# Supplementary material for: Application of different building representation techniques in HEC-RAS 2-D for urban flood modeling using the Toce River experimental case
Source: PeerJ. 2021 Jul 2;9:e11667. doi: 10.7717/peerj.11667 (PMC8256810; doi:10.7717/peerj.11667)
Supplement: Supplemental Information 2 — The raw output data show the results of numerical simulations using different techniques, different models, different mesh resolutions, different Manning value, and different configuration layout. [file peerj-09-11667-s002.xlsx]

## Sheet: BR_Technique(1A)
t	S3	S4	S5	S6	S7	S8	S9	S10		t	HEC_M10_P3	HEC_M10_P4	HEC_M10_P5	HEC_M10_P6	HEC_M10_P7	HEC_M10_P8	HEC_M10_P9	HEC_M10_P10		HEC_M0.1_P3	HEC_M0.1_P4	HEC_M0.1_P5	HEC_M0.1_P6	HEC_M0.1_P7	HEC_M0.1_P8	HEC_M0.1_P9	HEC_M0.1_P10		HEC_M1_P3	HEC_M1_P4	HEC_M1_P5	HEC_M1_P6	HEC_M1_P7	HEC_M1_P8	HEC_M1_P9	HEC_M1_P10		t	HEC_P3	HEC_P4	HEC_P5	HEC_P6	HEC_P7	HEC_P8	HEC_P9	HEC_P10
0	0.00011	-8e-05	0.00039	6e-05	0	-3e-05	-7e-05	-4e-05		0	0	0	0	0	0	0	0	0		0	0	0	0	0	0	0	0		0	0	0	0	0	0	0	0		0	0	0	0	0	0	0	0	0
0.2	-0.00014	7e-05	-6e-05	0.00011	0	-3e-05	-7e-05	-9e-05		0.2	0	0	0	0	0	0	0	0		0	0	0	0	0	0	0	0		0	0	0	0	0	0	0	0		0.2	0	0	0	0	0	0	0	0
0.4	-0.00014	-3e-05	-6e-05	6e-05	-0.00015	0.00012	-2e-05	-9e-05		0.4	0	0	0	0	0	0	0	0		0	0	0	0	0	0	0	0		0	0	0	0	0	0	0	0		0.4	0	0	0	0	0	0	0	0
0.6	6e-05	2e-05	-6e-05	6e-05	5e-05	-8e-05	3e-05	-9e-05		0.6	0	0	0	0	0	0	0	0		0	0	0	0	0	0	0	0		0	0	0	0	0	0	0	0		0.6	0	0	0	0	0	0	0	0
0.8	1e-05	-0.00013	4e-05	6e-05	-5e-05	-3e-05	3e-05	-9e-05		0.8	0	0	0	0	0	0	0	0		0	0	0	0	0	0	0	0		0	0	0	0	0	0	0	0		0.8	0	0	0	0	0	0	0	0
1	-0.00014	0.00017	-6e-05	6e-05	-0.00015	0.00012	3e-05	-0.00014		1	0	0	0	0	0	0	0	0		0	0	0	0	0	0	0	0		0	0	0	0	0	0	0	0		1	0	0	0	0	0	0	0	0
1.2	1e-05	-3e-05	-0.00021	1e-05	0.0001	-3e-05	-2e-05	-0.00014		1.2	0	0	0	0	0	0	0	0		0	0	0	0	0	0	0	0		0	0	0	0	0	0	0	0		1.2	0	0	0	0	0	0	0	0
1.4	1e-05	-3e-05	9e-05	6e-05	0	-3e-05	-2e-05	-0.00014		1.4	0	0	0	0	0	0	0	0		0	0	0	0	0	0	0	0		0	0	0	0	0	0	0	0		1.4	0	0	0	0	0	0	0	0
1.6	0.00026	-0.00013	4e-05	-4e-05	-5e-05	0.00012	-2e-05	-0.00014		1.6	0	0	0	0	0	0	0	0		0	0	0	0	0	0	0	0		0	0	0	0	0	0	0	0		1.6	0	0	0	0	0	0	0	0
1.8	1e-05	0.00027	-1e-05	-4e-05	0.0002	-0.00013	3e-05	-0.00014		1.8	0	0	0	0	0	0	0	0		0	0	0	0	0	0	0	0		0	0	0	0	0	0	0	0		1.8	0	0	0	0	0	0	0	0
2	-9e-05	2e-05	-1e-05	1e-05	0	-3e-05	0.00013	-9e-05		2	0	0	0	0	0	0	0	0		0	0	0	0	0	0	0	0		0	0	0	0	0	0	0	0		2	0	0	0	0	0	0	0	0
2.2	0.00011	-0.00018	-1e-05	-4e-05	0	0.00012	0.00013	-9e-05		2.2	0	0	0	0	0	0	0	0		0	0	0	0	0	0	0	0		0	0	0	0	0	0	0	0		2.2	0	0	0	0	0	0	0	0
2.4	1e-05	-0.00013	-1e-05	1e-05	-0.00015	-0.00013	0.00013	1e-05		2.4	0	0	0	0	0	0	0	0		0	0	0	0	0	0	0	0		0	0	0	0	0	0	0	0		2.4	0	0	0	0	0	0	0	0
2.6	-9e-05	0.00032	-0.00016	-4e-05	5e-05	7e-05	0.00023	0.00011		2.6	0	0	0	0	0	0	0	0		0	0	0	0	0	0	0	0		0	0	0	0	0	0	0	0		2.6	0	0	0	0	0	0	0	0
2.8	0.00011	7e-05	4e-05	-4e-05	0	0.00012	-7e-05	0.00031		2.8	0	0	0	0	0	0	0	0		0	0	0	0	0	0	0	0		0	0	0	0	0	0	0	0		2.8	0	0	0	0	0	0	0	0
3	1e-05	-8e-05	4e-05	-4e-05	-0.00015	-0.00013	-0.00012	0.00021		3	0	0	0	0	0	0	0	0		0	0	0	0	0	0	0	0		0	0	0	0	0	0	0	0		3	0	0	0	0	0	0	0	0
3.2	-0.00014	-0.00013	-0.00016	-9e-05	0.0001	-0.00013	-0.00012	0.00011		3.2	0	0	0	0	0	0	0	0		0	0	0	0	0	0	0	0		0	0	0	0	0	0	0	0		3.2	0	0	0	0	0	0	0	0
3.4	6e-05	0.00017	0.00034	-4e-05	0	0.00012	-7e-05	0.00011		3.4	0	0	0	0	0	0	0	0		0	0	0	0	0	0	0	0		0	0	0	0	0	0	0	0		3.4	0	0	0	0	0	0	0	0
3.6	1e-05	-3e-05	-6e-05	-9e-05	0	-0.00018	-7e-05	0.00016		3.6	0	0	0	0	0	0	0	0		0	0	0	0	0	0	0	0		0	0	0	0	0	0	0	0		3.6	0	0	0	0	0	0	0	0
3.8	-0.00014	2e-05	-1e-05	-4e-05	0.0002	7e-05	-2e-05	0.00011		3.8	0	0	0	0	0	0	0	0		0	0	0	0	0	0	0	0		0	0	0	0	0	0	0	0		3.8	0	0	0	0	0	0	0	0
4	1e-05	-8e-05	-0.00016	-9e-05	0	2e-05	-2e-05	6e-05		4	0	0	0	0	0	0	0	0		0	0	0	0	0	0	0	0		0	0	0	0	0	0	0	0		4	0	0	0	0	0	0	0	0
4.2	-4e-05	7e-05	-1e-05	-9e-05	-5e-05	-0.00018	-0.00017	6e-05		4.2	0	0	0	0	0	0	0	0		0	0	0	0	0	0	0	0		0	0	0	0	0	0	0	0		4.2	0	0	0	0	0	0	0	0
4.4	0.00011	7e-05	-0.00016	-9e-05	5e-05	-8e-05	3e-05	6e-05		4.4	0	0	0	0	0	0	0	0		0	0	0	0	0	0	0	0		0	0	0	0	0	0	0	0		4.4	0	0	0	0	0	0	0	0
4.6	-4e-05	-3e-05	-0.00021	-4e-05	5e-05	2e-05	3e-05	1e-05		4.6	0	0	0	0	0	0	0	0		0	0	0	0	0	0	0	0		0	0	0	0	0	0	0	0		4.6	0	0	0	0	0	0	0	0
4.8	-9e-05	-8e-05	4e-05	-4e-05	-5e-05	-0.00023	-2e-05	6e-05		4.8	0	0	0	0	0	0	0	0		0	0	0	0	0	0	0	0		0	0	0	0	0	0	0	0		4.8	0	0	0	0	0	0	0	0
5	0.00016	-8e-05	-6e-05	1e-05	-0.0002	-3e-05	3e-05	1e-05		5	0	0	0	0	0	0	0	0		0	0	0	0	0	0	0	0		0	0	0	0	0	0	0	0		5	0	0	0	0	0	0	0	0
5.2	-4e-05	7e-05	-0.00011	1e-05	5e-05	-3e-05	8e-05	1e-05		5.2	0	0	0	0	0	0	0	0		0	0	0	0	0	0	0	0		0	0	0	0	0	0	0	0		5.2	0	0	0	0	0	0	0	0
5.4	-0.00014	2e-05	9e-05	-9e-05	-0.0001	-0.00018	8e-05	1e-05		5.4	0	0	0	0	0	0	0	0		0	0	0	0	0	0	0	0		0	0	0	0	0	0	0	0		5.4	0	0	0	0	0	0	0	0
5.6	6e-05	-3e-05	-6e-05	-0.00019	-0.0001	-0.00013	0.00013	-9e-05		5.6	0	0	0	0	0	0	0	0		0	0	0	0	0	0	0	0		0	0	0	0	0	0	0	0		5.6	0	0	0	0	0	0	0	0
5.8	1e-05	-8e-05	-6e-05	1e-05	0.0001	-8e-05	0.00033	-4e-05		5.8	0	0	0	0	0	0	0	0		0	0	0	0	0	0	0	0		0	0	0	0	0	0	0	0		5.8	0	0	0	0	0	0	0	0
6	-0.00014	7e-05	-0.00021	-4e-05	-0.0001	-3e-05	3e-05	1e-05		6	0	0	0	0	0	0	0	0		0	0	0	0	0	0	0	0		0	0	0	0	0	0	0	0		6	0	0	0	0	0	0	0	0
6.2	6e-05	-3e-05	-1e-05	-4e-05	0	-0.00013	-0.00017	-4e-05		6.2	0	0	0	0	0	0	0	0		0	0	0	0	0	0	0	0		0	0	0	0	0	0	0	0		6.2	0	0	0	0	0	0	0	0
6.4	1e-05	-3e-05	4e-05	-4e-05	0.0002	2e-05	-0.00012	-4e-05		6.4	0	0	0	0	0	0	0	0		0	0	0	0	0	0	0	0		0	0	0	0	0	0	0	0		6.4	0	0	0	0	0	0	0	0
6.6	-0.00014	-0.00013	-0.00016	-4e-05	0	0.00032	-7e-05	1e-05		6.6	0	0	0	0	0	0	0	0		0	0	0	0	0	0	0	0		0	0	0	0	0	0	0	0		6.6	0	0	0	0	0	0	0	0
6.8	1e-05	2e-05	0.00014	-9e-05	0	-0.00013	-7e-05	-4e-05		6.8	0	0	0	0	0	0	0	0		0	0	0	0	0	0	0	0		0	0	0	0	0	0	0	0		6.8	0	0	0	0	0	0	0	0
7	-4e-05	2e-05	-6e-05	-9e-05	-0.00015	-0.00018	-2e-05	1e-05		7	0	0	0	0	0	0	0	0		0	0	0	0	0	0	0	0		0	0	0	0	0	0	0	0		7	0	0	0	0	0	0	0	0
7.2	6e-05	-0.00013	-6e-05	-4e-05	5e-05	-3e-05	-2e-05	-4e-05		7.2	0	0	0	0	0	0	0	0		0	0	0	0	0	0	0	0		0	0	0	0	0	0	0	0		7.2	0	0	0	0	0	0	0	0
7.4	1e-05	-0.00018	-0.00016	-9e-05	0	-0.00018	8e-05	-0.00014		7.4	0	0	0	0	0	0	0	0		0	0	0	0	0	0	0	0		0	0	0	0	0	0	0	0		7.4	0	0	0	0	0	0	0	0
7.6	-9e-05	0.00012	-6e-05	-0.00014	-0.0002	-8e-05	3e-05	-4e-05		7.6	0	0	0	0	0	0	0	0		0	0	0	0	0	0	0	0		0	0	0	0	0	0	0	0		7.6	0	0	0	0	0	0	0	0
7.8	0.00011	2e-05	-0.00026	-4e-05	5e-05	2e-05	3e-05	1e-05		7.8	0	0	0	0	0	0	0	0		0	0	0	0	0	0	0	0		0	0	0	0	0	0	0	0		7.8	0	0	0	0	0	0	0	0
8	-4e-05	-3e-05	-0.00021	-0.00014	-5e-05	-0.00018	-2e-05	-4e-05		8	0	0	0	0	0	0	0	0		0	0	0	0	0	0	0	0		0	0	0	0	0	0	0	0		8	0	0	0	0	0	0	0	0
8.2	-0.00014	-0.00018	4e-05	-0.00014	-0.0001	-3e-05	-2e-05	-9e-05		8.2	0	0	0	0	0	0	0	0		0	0	0	0	0	0	0	0		0	0	0	0	0	0	0	0		8.2	0	0	0	0	0	0	0	0
8.4	6e-05	7e-05	-6e-05	-0.00014	0.0001	2e-05	8e-05	-9e-05		8.4	0	0	0	0	0	0	0	0		0	0	0	0	0	0	0	0		0	0	0	0	0	0	0	0		8.4	0	0	0	0	0	0	0	0
8.6	1e-05	-3e-05	-0.00016	-9e-05	-5e-05	-0.00023	8e-05	-9e-05		8.6	0	0	0	0	0	0	0	0		0	0	0	0	0	0	0	0		0	0	0	0	0	0	0	0		8.6	0	0	0	0	0	0	0	0
8.8	-0.00014	-8e-05	0.00024	-0.00014	-5e-05	2e-05	8e-05	-0.00014		8.8	0	0	0	0	0	0	0	0		0	0	0	0	0	0	0	0		0	0	0	0	0	0	0	0		8.8	0	0	0	0	0	0	0	0
9	6e-05	-0.00013	-6e-05	-0.00014	0	-3e-05	0.00013	-0.00014		9	0	0	0	0	0	0	0	0		0	0	0	0	0	0	0	0		0	0	0	0	0	0	0	0		9	0	0	0	0	0	0	0	0
9.2	1e-05	0.00012	-6e-05	-0.00019	0	-0.00023	8e-05	-0.00014		9.2	0	0	0	0	0	0	0	0		0	0	0	0	0	0	0	0		0	0	0	0	0	0	0	0		9.2	0	0	0	0	0	0	0	0
9.4	-0.00014	-3e-05	-0.00021	-0.00019	0	-8e-05	-0.00012	-9e-05		9.4	0	0	0	0	0	0	0	0		0	0	0	0	0	0	0	0		0	0	0	0	0	0	0	0		9.4	0	0	0	0	0	0	0	0
9.6	-4e-05	-8e-05	4e-05	-0.00019	-0.00015	-0.00013	-0.00012	-0.00014		9.6	0	0	0	0	0	0	0	0		0	0	0	0	0	0	0	0		0	0	0	0	0	0	0	0		9.6	0	0	0	0	0	0	0	0
9.8	-4e-05	-0.00018	-1e-05	-0.00024	0	-0.00013	-0.00012	-0.00019		9.8	0	0	0	0	0	0	0	0		0	0	0	0	0	0	0	0		0	0	0	0	0	0	0	0		9.8	0	0	0	0	0	0	0	0
10	1e-05	7e-05	-0.00021	-0.00019	-0.0002	-0.00013	-7e-05	-0.00014		10	0	0	0	0	0	0	0	0		0	0	0	0	0	0	0	0		0	0	0	0	0	0	0	0		10	0	0	0	0	0	0	0	0
10.2	-4e-05	-3e-05	9e-05	-0.00019	-0.0002	-8e-05	-7e-05	-0.00014		10.2	0	0	0	0	0	0	0	0		0	0	0	0	0	0	0	0		0	0	0	0	0	0	0	0		10.2	0	0	0	0	0	0	0	0
10.4	-9e-05	-3e-05	-6e-05	-0.00024	5e-05	0.00027	-2e-05	-0.00019		10.4	0	0	0	0	0	0	0	0		0	0	0	0	0	0	0	0		0	0	0	0	0	0	0	0		10.4	0	0	0	0	0	0	0	0
10.6	0.00011	-0.00013	-0.00011	-0.00024	-0.0001	-0.00013	3e-05	-0.00014		10.6	0	0.0334	0	0	0	0	0	0		0	0.0334	0	0	0	0	0	0		0	0.0334	0	0	0	0	0	0		10.6	0	0.0334	0	0	0	0	0	0
10.8	-9e-05	0.00012	4e-05	-0.00024	-0.00015	-8e-05	-2e-05	-0.00019		10.8	0.0096	0.0355	0	0	0	0	0	0		0.0096	0.0315	0	0	0	0	0	0		0.0096	0.0316	0	0	0	0	0	0		10.8	0.0096	0.0653	0	0	0	0	0	0
11	-9e-05	0.01222	-6e-05	-0.00024	0.00015	2e-05	-2e-05	-0.00014		11	0.0346	0.0772	0	0	0	0	0	0		0.0346	0.0312	0	0	0	0	0	0		0.0346	0.0542	0	0	0	0	0	0		11	0.0345	0.0797	0	0	0	0	0	0
11.2	0.00856	0.01177	-6e-05	-0.00034	0	-0.00013	-7e-05	-9e-05		11.2	0.0522	0.0715	0.0307	0	0	0	0	0		0.035	0.0273	0.0395	0	0	0	0	0		0.0491	0.0656	0.031	0	0	0	0	0		11.2	0.0545	0.0709	0.0306	0	0	0	0	0
11.4	0.01061	0.01367	0.00559	-0.00024	-5e-05	-8e-05	8e-05	1e-05		11.4	0.053	0.0763	0.0283	0	0	0	0	0		0.0336	0.0253	0.042	0	0	0	0	0		0.0523	0.0765	0.0284	0	0	0	0	0		11.4	0.0534	0.0773	0.0282	0	0	0	0	0
11.6	0.01181	0.02292	0.01494	-0.00024	-0.0002	2e-05	3e-05	0.00011		11.6	0.0556	0.075	0.0295	0	0	0	0	0		0.0341	0.0228	0.0449	0.0279	0	0	0	0		0.0545	0.0713	0.0309	0	0	0	0	0		11.6	0.0553	0.0765	0.0297	0	0	0	0	0
11.8	0.01331	0.03092	0.01844	-0.00029	5e-05	-0.00023	-2e-05	0.00026		11.8	0.0555	0.0788	0.0314	0.0078	0	0.0306	0	0		0.0327	0.0256	0.0434	0.0256	0	0.0359	0	0		0.0547	0.0736	0.0341	0.0076	0	0.023	0	0		11.8	0.0563	0.0798	0.0322	0.0064	0	0.0362	0	0
12	0.01706	0.03382	0.01754	0.00066	0	0.00627	8e-05	0.00016		12	0.0613	0.082	0.0353	0.0081	0	0.0322	0	0		0.0343	0.0225	0.0448	0.027	0.0264	0.0399	0	0		0.0607	0.0746	0.0378	0.0067	0	0.0332	0	0		12	0.0628	0.0837	0.0387	0.0119	0	0.0328	0	0
12.2	0.01746	0.03642	0.01979	0.00136	-0.00015	0.01307	8e-05	0.00011		12.2	0.0639	0.0804	0.0431	0.0287	0.0224	0.0341	0.0147	0		0.0354	0.0238	0.0463	0.0263	0.03	0.0379	0.0231	0		0.0616	0.0758	0.0423	0.0259	0.0228	0.034	0.0089	0		12.2	0.0642	0.081	0.0448	0.0298	0.0221	0.0365	0.0138	0
12.4	0.02076	0.04367	0.02344	0.00266	0.0067	0.01547	0.00033	6e-05		12.4	0.0624	0.0795	0.041	0.0294	0.0218	0.0406	0.0053	0		0.0348	0.0244	0.0452	0.0286	0.0297	0.0408	0.0238	0		0.0613	0.0762	0.0421	0.0287	0.021	0.0376	0.0067	0		12.4	0.0625	0.0802	0.0405	0.0321	0.0245	0.0451	0.0058	0
12.6	0.02851	0.04817	0.02414	0.01246	0.0123	0.01622	0.00098	6e-05		12.6	0.0677	0.0835	0.0404	0.0291	0.026	0.0431	0.0074	0		0.0447	0.03	0.0446	0.0294	0.0333	0.0417	0.0278	0		0.0669	0.0804	0.0414	0.0277	0.0236	0.0434	0.0067	0		12.6	0.0675	0.0844	0.0404	0.0305	0.0277	0.0471	0.0112	0
12.8	0.03826	0.06057	0.02669	0.01386	0.01965	0.01752	0.00308	1e-05		12.8	0.0681	0.0876	0.0398	0.0308	0.0304	0.0441	0.0257	0		0.0505	0.0288	0.0454	0.0298	0.0343	0.0432	0.0286	0.025		0.0677	0.0819	0.041	0.0269	0.0276	0.0425	0.025	0		12.8	0.0689	0.0896	0.0408	0.0313	0.0314	0.0473	0.0274	0
13	0.04916	0.07412	0.02794	0.02156	0.02145	0.01862	0.00578	1e-05		13	0.0746	0.0876	0.0425	0.0305	0.0355	0.0449	0.03	0		0.0553	0.0289	0.0495	0.0302	0.0343	0.0454	0.0287	0.0279		0.0713	0.0835	0.0434	0.0277	0.0342	0.044	0.0279	0		13	0.0768	0.0877	0.0436	0.0319	0.0377	0.048	0.0312	0.0089
13.2	0.06541	0.07367	0.02954	0.01996	0.0256	0.01972	0.01258	-0.00124		13.2	0.0701	0.0865	0.0415	0.0338	0.0322	0.0462	0.0273	0.0199		0.0511	0.0298	0.0491	0.0367	0.0459	0.0475	0.0294	0.0279		0.0689	0.0844	0.0446	0.0302	0.0321	0.0451	0.0274	0.0196		13.2	0.0716	0.0867	0.0422	0.0352	0.0334	0.0492	0.03	0.0201
13.4	0.08311	0.08617	0.03114	0.02486	0.02465	0.02162	0.01458	0.01201		13.4	0.0703	0.0875	0.0419	0.0397	0.0354	0.0496	0.0285	0.0213		0.0509	0.0316	0.0487	0.0407	0.0455	0.051	0.041	0.0333		0.0677	0.0866	0.0457	0.0341	0.0317	0.0485	0.0288	0.0197		13.4	0.0711	0.0882	0.0425	0.0413	0.038	0.0531	0.0305	0.022
13.6	0.09356	0.10002	0.03409	0.02051	0.02425	0.02432	0.01683	0.01401		13.6	0.0704	0.0878	0.0446	0.0382	0.0388	0.0509	0.0311	0.0236		0.0519	0.0308	0.0515	0.0399	0.0429	0.0538	0.042	0.0347		0.0689	0.0846	0.0471	0.0363	0.0348	0.0503	0.0304	0.0223		13.6	0.0716	0.088	0.0465	0.0399	0.0406	0.0537	0.0365	0.0216
13.8	0.09211	0.11207	0.03734	0.02026	0.0322	0.03217	0.01813	0.01666		13.8	0.0711	0.088	0.0457	0.0371	0.0371	0.0494	0.035	0.0238		0.053	0.0326	0.0517	0.0405	0.042	0.0534	0.0403	0.0347		0.0698	0.086	0.0477	0.0374	0.0352	0.0521	0.0329	0.0201		13.8	0.071	0.0881	0.047	0.0382	0.0383	0.0535	0.039	0.0207
14	0.08721	0.10767	0.03649	0.02336	0.02875	0.03472	0.01658	0.01921		14	0.0689	0.0893	0.0459	0.0392	0.0369	0.0516	0.0342	0.0183		0.0525	0.0311	0.0515	0.0439	0.0412	0.0555	0.0416	0.0331		0.0687	0.0862	0.0485	0.0388	0.0349	0.0521	0.034	0.0164		14	0.0688	0.0911	0.0474	0.041	0.0382	0.0548	0.0361	0.0217
14.2	0.08866	0.08122	0.03739	0.02111	0.032	0.03662	0.02648	0.01711		14.2	0.0716	0.0916	0.0478	0.0377	0.0372	0.0522	0.0359	0.0204		0.0546	0.0311	0.0524	0.0434	0.0427	0.0542	0.0448	0.0344		0.0703	0.0866	0.0502	0.0394	0.0352	0.0523	0.0347	0.0189		14.2	0.0717	0.0926	0.0494	0.0396	0.0387	0.0556	0.0364	0.022
14.4	0.06751	0.05867	0.03899	0.02611	0.0382	0.03537	0.03343	0.01686		14.4	0.0745	0.0919	0.0478	0.0379	0.0392	0.0524	0.0355	0.0207		0.0556	0.0306	0.0529	0.046	0.0416	0.0561	0.0431	0.0365		0.0734	0.0869	0.051	0.0402	0.0365	0.0527	0.0348	0.0205		14.4	0.0755	0.0922	0.0489	0.0377	0.0412	0.0555	0.0371	0.0221
14.6	0.07586	0.06127	0.03879	0.02996	0.04085	0.03697	0.02658	0.01986		14.6	0.0739	0.091	0.047	0.039	0.0389	0.0537	0.0341	0.021		0.0571	0.0349	0.0525	0.0456	0.0447	0.0569	0.0444	0.0389		0.0721	0.0864	0.0519	0.041	0.0382	0.0533	0.0361	0.0212		14.6	0.0749	0.0918	0.0479	0.0399	0.0403	0.0576	0.0379	0.0218
14.8	0.07081	0.06082	0.03624	0.02856	0.0364	0.04277	0.02558	0.02331		14.8	0.0737	0.0901	0.046	0.043	0.04	0.0534	0.0362	0.0211		0.0554	0.0359	0.0528	0.0467	0.0456	0.0562	0.0451	0.0395		0.0716	0.0862	0.0527	0.0427	0.0392	0.053	0.0392	0.0219		14.8	0.0746	0.0911	0.0472	0.0451	0.0424	0.0571	0.0423	0.0211
15	0.05986	0.06542	0.03179	0.03486	0.04535	0.05187	0.03303	0.02011		15	0.0732	0.0918	0.0469	0.0441	0.0423	0.0535	0.0386	0.0207		0.0553	0.0384	0.0544	0.0467	0.0446	0.0565	0.0466	0.0404		0.0717	0.0885	0.0543	0.0437	0.0398	0.0529	0.0417	0.02		15	0.0751	0.0922	0.0481	0.0465	0.045	0.0566	0.0431	0.0209
15.2	0.05676	0.06552	0.03439	0.02776	0.04495	0.04847	0.03698	0.01876		15.2	0.073	0.0942	0.0472	0.0437	0.0426	0.0527	0.0405	0.0217		0.0543	0.046	0.0554	0.0472	0.0442	0.0583	0.0465	0.0407		0.0713	0.0907	0.0553	0.044	0.0404	0.0533	0.0423	0.0215		15.2	0.0743	0.0953	0.0482	0.0455	0.0441	0.0558	0.0445	0.0226
15.4	0.05421	0.06997	0.03574	0.03796	0.0441	0.04777	0.03878	0.02191		15.4	0.0764	0.0942	0.0486	0.0436	0.0421	0.0527	0.0418	0.0225		0.0561	0.0538	0.0569	0.046	0.0456	0.0567	0.0472	0.0408		0.0732	0.0913	0.0556	0.0439	0.0413	0.0532	0.0428	0.0264		15.4	0.0762	0.0944	0.0496	0.0453	0.0438	0.0557	0.0467	0.0244
15.6	0.05036	0.06872	0.03814	0.04091	0.0384	0.04587	0.03318	0.02261		15.6	0.0774	0.0928	0.0487	0.0439	0.0415	0.053	0.0434	0.022		0.0571	0.0591	0.0576	0.0473	0.0449	0.0562	0.0468	0.0418		0.0748	0.0913	0.0559	0.0445	0.0415	0.0535	0.0432	0.0278		15.6	0.0772	0.0941	0.0509	0.0459	0.043	0.0556	0.0472	0.0252
15.8	0.06066	0.07227	0.04424	0.03876	0.04365	0.04272	0.03988	0.02541		15.8	0.0764	0.0916	0.0506	0.0441	0.0419	0.0544	0.0431	0.0235		0.0565	0.0601	0.0583	0.0488	0.0455	0.057	0.0479	0.0426		0.075	0.0892	0.0578	0.045	0.0421	0.0543	0.0436	0.0251		15.8	0.0771	0.0942	0.053	0.0454	0.0435	0.0575	0.0455	0.0258
16	0.06731	0.07332	0.03969	0.04041	0.0455	0.04337	0.03938	0.02546		16	0.0756	0.0931	0.0515	0.0453	0.0432	0.0545	0.0433	0.0245		0.0559	0.0617	0.0591	0.0492	0.0471	0.0575	0.0491	0.0426		0.0749	0.0901	0.0594	0.0461	0.0428	0.0544	0.0448	0.025		16	0.0761	0.0943	0.0528	0.0468	0.0444	0.0578	0.0472	0.0262
16.2	0.06436	0.06372	0.04259	0.03921	0.0442	0.04602	0.04133	0.03281		16.2	0.0755	0.0923	0.0513	0.0462	0.044	0.0547	0.0443	0.025		0.055	0.0598	0.0586	0.0497	0.0465	0.0579	0.0502	0.0438		0.0742	0.0874	0.059	0.047	0.0434	0.0543	0.0458	0.0273		16.2	0.0767	0.0926	0.0521	0.0486	0.0448	0.0589	0.0479	0.0259
16.4	0.06821	0.07677	0.04159	0.04831	0.0434	0.04847	0.03748	0.03076		16.4	0.0757	0.0899	0.0509	0.0463	0.0439	0.0544	0.0447	0.0252		0.0555	0.0582	0.0594	0.0492	0.0462	0.0575	0.0504	0.0448		0.0748	0.086	0.0593	0.0469	0.0443	0.0539	0.0463	0.0277		16.4	0.0764	0.0914	0.0525	0.0493	0.045	0.0589	0.0485	0.0264
16.6	0.06966	0.08267	0.04069	0.04286	0.0529	0.05132	0.03973	0.02791		16.6	0.0739	0.0899	0.0502	0.0468	0.0442	0.0543	0.0447	0.0248		0.0541	0.0602	0.0578	0.0498	0.0465	0.0576	0.05	0.0449		0.0725	0.0853	0.0579	0.0475	0.0447	0.0538	0.0463	0.0252		16.6	0.0742	0.0911	0.0513	0.0499	0.0457	0.0588	0.0478	0.0262
16.8	0.07811	0.07867	0.04249	0.04676	0.05315	0.04997	0.03463	0.02311		16.8	0.0732	0.0895	0.0498	0.0465	0.0446	0.0541	0.0449	0.0245		0.0526	0.0596	0.0572	0.0492	0.0469	0.0562	0.0504	0.045		0.0713	0.0835	0.0576	0.0475	0.0444	0.0543	0.0467	0.027		16.8	0.0746	0.091	0.0506	0.0492	0.0469	0.0582	0.048	0.0262
17	0.08626	0.08157	0.03964	0.05101	0.0476	0.05247	0.04443	0.02456		17	0.0751	0.0886	0.05	0.0452	0.0449	0.0533	0.0453	0.025		0.0544	0.0593	0.0572	0.0477	0.0463	0.0546	0.0498	0.0445		0.0731	0.0831	0.0587	0.0473	0.0449	0.054	0.047	0.0293		17	0.0753	0.0887	0.0502	0.0473	0.0475	0.0575	0.0493	0.0262
17.2	0.08441	0.08422	0.03949	0.04191	0.04965	0.04977	0.04223	0.02706		17.2	0.0727	0.0882	0.0493	0.0454	0.0438	0.0528	0.0462	0.0254		0.0537	0.0577	0.0564	0.0482	0.0455	0.0542	0.0484	0.0448		0.0707	0.0832	0.0581	0.0476	0.0441	0.0535	0.0469	0.0291		17.2	0.0734	0.0875	0.0497	0.0474	0.0465	0.0567	0.051	0.0263
17.4	0.08701	0.08477	0.03994	0.04271	0.0484	0.05367	0.04253	0.02731		17.4	0.0718	0.0863	0.0499	0.0458	0.0431	0.0536	0.0466	0.0254		0.0524	0.0572	0.0552	0.048	0.045	0.0542	0.0487	0.0444		0.07	0.0819	0.057	0.0476	0.0435	0.0542	0.047	0.0257		17.4	0.0726	0.0872	0.05	0.0479	0.0455	0.0566	0.0505	0.0267
17.6	0.07881	0.08287	0.03749	0.03821	0.04505	0.05327	0.04738	0.03041		17.6	0.0714	0.0856	0.0503	0.046	0.0433	0.0528	0.047	0.0252		0.052	0.0566	0.0559	0.0475	0.0448	0.0541	0.049	0.0434		0.0701	0.082	0.0574	0.0472	0.0438	0.0535	0.0479	0.0272		17.6	0.0717	0.0868	0.0501	0.0484	0.0449	0.0558	0.0497	0.0267
17.8	0.07731	0.08347	0.03819	0.04576	0.0425	0.05247	0.04328	0.03136		17.8	0.0702	0.0849	0.0499	0.0457	0.0426	0.0529	0.0461	0.0252		0.0511	0.0562	0.0554	0.0468	0.0442	0.0536	0.0485	0.0431		0.0688	0.0809	0.0572	0.047	0.0434	0.0531	0.0471	0.0291		17.8	0.0709	0.0861	0.0496	0.0478	0.0439	0.0555	0.048	0.0271
18	0.07666	0.08562	0.03779	0.04756	0.0511	0.05212	0.04523	0.02721		18	0.0691	0.0853	0.05	0.0454	0.0417	0.0528	0.0457	0.0255		0.0507	0.0566	0.0551	0.0469	0.0435	0.0531	0.0479	0.0433		0.0676	0.081	0.0571	0.0473	0.0429	0.053	0.0467	0.0281		18	0.0688	0.0859	0.0501	0.0482	0.043	0.0551	0.0479	0.0281
18.2	0.07911	0.08342	0.03909	0.04761	0.051	0.05922	0.03873	0.02861		18.2	0.0689	0.0842	0.0506	0.0457	0.0421	0.0522	0.046	0.0249		0.0511	0.0547	0.0548	0.0462	0.0434	0.0526	0.0477	0.0433		0.067	0.0793	0.0566	0.047	0.043	0.0526	0.047	0.0255		18.2	0.0685	0.0847	0.0507	0.0475	0.0431	0.0551	0.0487	0.0281
18.4	0.07806	0.07852	0.03529	0.04041	0.0569	0.05532	0.04853	0.02506		18.4	0.0688	0.0827	0.0503	0.0453	0.0422	0.052	0.046	0.0247		0.0499	0.0541	0.0542	0.0456	0.0424	0.0521	0.0469	0.043		0.0667	0.0789	0.0559	0.0465	0.0427	0.0528	0.0463	0.0272		18.4	0.0691	0.0826	0.0502	0.0465	0.0431	0.0549	0.0493	0.0273
18.6	0.07841	0.07867	0.03644	0.05411	0.04695	0.05227	0.04578	0.02576		18.6	0.0681	0.0814	0.0498	0.0445	0.0418	0.0523	0.0459	0.025		0.0486	0.0531	0.0535	0.0455	0.0416	0.0521	0.0465	0.0424		0.0664	0.0781	0.0555	0.046	0.0424	0.0526	0.0462	0.0281		18.6	0.0689	0.082	0.049	0.0459	0.0428	0.0552	0.0493	0.0264
18.8	0.08076	0.08132	0.03479	0.04241	0.05105	0.05247	0.04353	0.02801		18.8	0.0679	0.08	0.049	0.0447	0.0415	0.0522	0.0462	0.0253		0.049	0.0523	0.0527	0.0449	0.0422	0.0513	0.0459	0.0418		0.0663	0.078	0.0552	0.0456	0.0422	0.0518	0.0463	0.0289		18.8	0.069	0.081	0.0484	0.0456	0.0434	0.0546	0.0489	0.0268
19	0.07706	0.08272	0.03654	0.04636	0.0543	0.06187	0.04563	0.02926		19	0.0682	0.0792	0.0483	0.0445	0.0418	0.0515	0.046	0.0226		0.0491	0.0521	0.0518	0.0444	0.0421	0.0504	0.0455	0.0418		0.0652	0.0775	0.0545	0.0457	0.042	0.0513	0.046	0.025		19	0.068	0.0799	0.0483	0.0459	0.0443	0.0538	0.0479	0.027
19.2	0.07726	0.07862	0.03274	0.04636	0.0486	0.06807	0.05043	0.02821		19.2	0.0672	0.0784	0.049	0.0446	0.0413	0.051	0.0457	0.0227		0.0481	0.0512	0.0515	0.0442	0.0413	0.0502	0.0453	0.0417		0.0659	0.076	0.0548	0.0455	0.0418	0.051	0.0457	0.026		19.2	0.0676	0.0792	0.049	0.0462	0.0443	0.0529	0.0477	0.0269
19.4	0.07906	0.07647	0.03329	0.03971	0.0493	0.05462	0.04203	0.02636		19.4	0.0664	0.0782	0.0496	0.0444	0.0414	0.0505	0.0456	0.0242		0.0476	0.0501	0.0517	0.0436	0.0407	0.0496	0.0448	0.0412		0.0653	0.0757	0.0545	0.0453	0.0418	0.0507	0.0456	0.0283		19.4	0.0673	0.0788	0.0486	0.0465	0.0434	0.0523	0.0475	0.0252
19.6	0.07561	0.08287	0.03539	0.04016	0.054	0.04997	0.04878	0.02656		19.6	0.0663	0.0776	0.0495	0.0444	0.0412	0.0503	0.0456	0.0258		0.0476	0.0505	0.0509	0.0433	0.0404	0.0494	0.0442	0.0402		0.0646	0.0752	0.054	0.0452	0.0414	0.0507	0.0454	0.0293		19.6	0.067	0.0779	0.0472	0.0469	0.0427	0.0515	0.0471	0.0229
19.8	0.06921	0.08357	0.03439	0.05011	0.05205	0.05162	0.03913	0.02651		19.8	0.067	0.0773	0.0487	0.0446	0.0411	0.0501	0.0457	0.0254		0.0472	0.0501	0.0499	0.0429	0.0399	0.0488	0.0439	0.0399		0.065	0.0745	0.0535	0.0452	0.0414	0.0506	0.0455	0.0267		19.8	0.0663	0.0773	0.0479	0.047	0.0419	0.0516	0.0467	0.0231
20	0.07251	0.07517	0.03359	0.04581	0.0475	0.06012	0.04643	0.02841		20	0.0657	0.0766	0.0485	0.0448	0.041	0.0503	0.0458	0.0205		0.0465	0.0496	0.05	0.0425	0.0398	0.0483	0.0435	0.0396		0.0643	0.0736	0.0535	0.0449	0.0415	0.0503	0.0454	0.0258		20	0.0658	0.0782	0.049	0.0462	0.0416	0.0518	0.0472	0.0263
20.2	0.07461	0.07322	0.03374	0.04361	0.04805	0.05912	0.04088	0.02961		20.2	0.0655	0.0769	0.0491	0.0449	0.0408	0.0505	0.0459	0.0223		0.0467	0.0495	0.0502	0.0421	0.0395	0.0478	0.0433	0.0394		0.0638	0.0731	0.0534	0.0447	0.0412	0.0502	0.045	0.0281		20.2	0.0654	0.0777	0.0497	0.0454	0.0413	0.0522	0.0479	0.0264
20.4	0.07411	0.07272	0.03259	0.04481	0.04695	0.05577	0.04968	0.02836		20.4	0.0643	0.0768	0.0496	0.0447	0.0409	0.0507	0.0456	0.0253		0.0464	0.0491	0.0495	0.0422	0.0388	0.0478	0.0431	0.0392		0.0639	0.0725	0.0535	0.0445	0.0411	0.0503	0.0448	0.0292		20.4	0.0653	0.0762	0.0487	0.0444	0.0407	0.0532	0.0477	0.0239
20.6	0.07051	0.06922	0.03459	0.04176	0.0447	0.05437	0.04268	0.02691		20.6	0.0649	0.0763	0.0488	0.0442	0.0409	0.0506	0.0454	0.0247		0.0456	0.0491	0.0492	0.0419	0.0385	0.0476	0.043	0.0389		0.0631	0.0719	0.0532	0.0443	0.0408	0.0502	0.0449	0.0273		20.6	0.0647	0.0758	0.0468	0.0441	0.0411	0.0528	0.0477	0.0249
20.8	0.07006	0.07247	0.03779	0.04531	0.04605	0.05012	0.03968	0.02541		20.8	0.0639	0.0759	0.047	0.0438	0.0407	0.05	0.0453	0.0212		0.0455	0.0486	0.0489	0.041	0.0385	0.0469	0.0426	0.0384		0.0633	0.0726	0.0526	0.0442	0.0407	0.0502	0.0448	0.025		20.8	0.0641	0.0755	0.0456	0.0442	0.0414	0.0519	0.0471	0.0249
21	0.07141	0.06942	0.03589	0.04281	0.04915	0.04652	0.04328	0.02396		21	0.0636	0.0755	0.0464	0.0437	0.0405	0.0495	0.0454	0.0215		0.046	0.0488	0.0487	0.041	0.0382	0.0465	0.0419	0.0383		0.0626	0.0729	0.052	0.0443	0.0405	0.0496	0.0448	0.0278		21	0.0639	0.0761	0.0456	0.045	0.0419	0.0505	0.0464	0.0247
21.2	0.06961	0.07017	0.03404	0.04411	0.0502	0.05617	0.03663	0.02631		21.2	0.0629	0.0751	0.047	0.0439	0.0406	0.0489	0.0454	0.0244		0.046	0.0483	0.0484	0.0409	0.0379	0.0464	0.0418	0.038		0.0623	0.0728	0.0517	0.044	0.0403	0.0492	0.0446	0.0283		21.2	0.0631	0.0759	0.046	0.0456	0.042	0.0499	0.0456	0.0247
21.4	0.06981	0.07657	0.03364	0.03941	0.05025	0.05207	0.04488	0.02836		21.4	0.063	0.0753	0.0474	0.0435	0.0402	0.0485	0.045	0.0246		0.0456	0.0476	0.0491	0.0408	0.0377	0.0465	0.0415	0.0375		0.0623	0.0727	0.0521	0.0436	0.0401	0.0492	0.0443	0.0258		21.4	0.0635	0.0753	0.046	0.0449	0.0412	0.0497	0.0455	0.0257
21.6	0.07291	0.08447	0.03209	0.04501	0.04885	0.04987	0.04598	0.02801		21.6	0.0624	0.0748	0.0466	0.0431	0.0398	0.0483	0.0448	0.0207		0.0452	0.0477	0.0483	0.0406	0.0376	0.0461	0.0413	0.0373		0.0623	0.0724	0.0518	0.0435	0.0399	0.0494	0.0443	0.025		21.6	0.0625	0.0745	0.0461	0.0442	0.0405	0.0498	0.046	0.0263
21.8	0.06981	0.07972	0.03409	0.04036	0.0446	0.05502	0.04103	0.02611		21.8	0.062	0.0735	0.0461	0.0428	0.0395	0.0487	0.0447	0.0216		0.0448	0.0474	0.0483	0.0407	0.0371	0.0464	0.0411	0.0371		0.0617	0.0718	0.0513	0.0434	0.0398	0.0494	0.0446	0.0275		21.8	0.0617	0.0743	0.0458	0.044	0.0398	0.0507	0.0463	0.0232
22	0.06906	0.07917	0.03089	0.04221	0.04585	0.05482	0.04388	0.02666		22	0.061	0.0732	0.0463	0.0429	0.0392	0.0488	0.0451	0.0241		0.0451	0.0475	0.048	0.0397	0.0373	0.0459	0.041	0.0367		0.0612	0.0709	0.0512	0.0432	0.0397	0.0491	0.0444	0.0279		22	0.0616	0.0738	0.0456	0.0432	0.0396	0.0508	0.0465	0.0242
22.2	0.06761	0.07577	0.03069	0.03986	0.0501	0.05122	0.03768	0.02606		22.2	0.0609	0.0731	0.0464	0.0426	0.0392	0.0487	0.0453	0.024		0.0442	0.0472	0.0472	0.0399	0.0371	0.0457	0.0404	0.0365		0.0604	0.0703	0.0511	0.043	0.0396	0.0487	0.0441	0.0235		22.2	0.061	0.0732	0.0451	0.0425	0.0394	0.0504	0.0463	0.0258
22.4	0.07041	0.07037	0.03219	0.04101	0.0436	0.04952	0.04458	0.03166		22.4	0.0606	0.0732	0.0464	0.0425	0.039	0.0483	0.0449	0.0205		0.0438	0.0464	0.0474	0.0399	0.0367	0.0452	0.0406	0.0368		0.0595	0.0702	0.051	0.0426	0.0394	0.0482	0.0439	0.0255		22.4	0.0603	0.0731	0.0442	0.0421	0.0392	0.0494	0.046	0.0272
22.6	0.06881	0.07157	0.03089	0.04486	0.04545	0.05312	0.03978	0.02636		22.6	0.0601	0.0724	0.0455	0.0419	0.039	0.0475	0.0443	0.0205		0.044	0.0461	0.0472	0.0392	0.0366	0.0449	0.0404	0.0365		0.0589	0.0694	0.0508	0.0423	0.0391	0.0479	0.0436	0.0272		22.6	0.0603	0.0724	0.0436	0.0422	0.0394	0.0479	0.0452	0.0258
22.8	0.06726	0.07132	0.02999	0.03686	0.0454	0.05347	0.04093	0.02656		22.8	0.06	0.0718	0.045	0.0417	0.0389	0.0467	0.0436	0.0235		0.044	0.0464	0.0465	0.0391	0.0362	0.045	0.0399	0.0362		0.0589	0.0691	0.0505	0.0421	0.0388	0.0477	0.0433	0.0274		22.8	0.0601	0.0716	0.0434	0.0429	0.0392	0.0467	0.0442	0.0234
23	0.06541	0.07512	0.03029	0.04761	0.0474	0.05477	0.03948	0.02391		23	0.0596	0.071	0.0449	0.042	0.0385	0.0462	0.0436	0.0238		0.0439	0.0463	0.0462	0.0389	0.0361	0.0445	0.0398	0.036		0.0586	0.069	0.0503	0.0418	0.0384	0.0474	0.0431	0.0256		23	0.0604	0.0708	0.0429	0.0427	0.0385	0.0468	0.0439	0.023
23.2	0.06816	0.07192	0.03129	0.03671	0.0513	0.04967	0.04133	0.02721		23.2	0.0601	0.0707	0.045	0.042	0.0382	0.046	0.0438	0.0186		0.0434	0.0468	0.0465	0.0387	0.036	0.0441	0.0397	0.0357		0.0584	0.0683	0.0501	0.0417	0.0381	0.0472	0.043	0.0249		23.2	0.0595	0.0704	0.0433	0.0427	0.038	0.0474	0.0444	0.0251
23.4	0.06706	0.07177	0.03264	0.04291	0.04185	0.05122	0.04348	0.02741		23.4	0.0594	0.0704	0.045	0.0419	0.0378	0.0464	0.0438	0.0202		0.0434	0.0459	0.0465	0.0386	0.0357	0.044	0.0393	0.0357		0.0585	0.0684	0.0502	0.0416	0.0379	0.0469	0.0429	0.0267		23.4	0.0589	0.0704	0.0442	0.0423	0.0377	0.0486	0.0447	0.0261
23.6	0.06556	0.07472	0.03154	0.04106	0.04105	0.04547	0.03843	0.02836		23.6	0.0591	0.0698	0.0452	0.0412	0.0375	0.0474	0.0438	0.0238		0.0436	0.046	0.0466	0.0387	0.0356	0.0441	0.0394	0.0357		0.0581	0.0683	0.0502	0.0414	0.0379	0.0467	0.0428	0.0275		23.6	0.0585	0.0699	0.045	0.0416	0.0377	0.0495	0.0442	0.0223
23.8	0.06931	0.07867	0.03239	0.03876	0.0415	0.04672	0.04058	0.02721		23.8	0.0585	0.0693	0.0454	0.0405	0.0374	0.0479	0.044	0.023		0.0433	0.0458	0.0462	0.0386	0.0354	0.0441	0.0392	0.0353		0.0577	0.0677	0.05	0.0413	0.0378	0.0467	0.0426	0.0227		23.8	0.0587	0.0695	0.0446	0.0409	0.0379	0.0501	0.0439	0.023
24	0.06516	0.07277	0.03154	0.04006	0.04555	0.04922	0.03828	0.02461		24	0.0583	0.0692	0.0451	0.0404	0.0375	0.0479	0.0441	0.019		0.0427	0.0459	0.0458	0.0382	0.0353	0.044	0.0391	0.0351		0.0573	0.0673	0.0496	0.041	0.0376	0.0466	0.0425	0.0235		24	0.0584	0.069	0.0432	0.0406	0.0383	0.0496	0.0439	0.0247
24.2	0.06541	0.06802	0.03074	0.03906	0.0509	0.04892	0.04143	0.02436		24.2	0.058	0.0688	0.0443	0.0407	0.0377	0.0472	0.0438	0.0193		0.0425	0.0455	0.0456	0.038	0.0352	0.0437	0.0391	0.035		0.0573	0.0667	0.0493	0.0406	0.0374	0.0466	0.0424	0.0262		24.2	0.0578	0.0686	0.0423	0.0404	0.038	0.0483	0.0437	0.0241
24.4	0.06706	0.07067	0.03139	0.03961	0.04015	0.04947	0.04038	0.02646		24.4	0.0583	0.0682	0.0437	0.0412	0.0379	0.046	0.043	0.0223		0.0425	0.045	0.0455	0.0375	0.0348	0.0434	0.0385	0.0348		0.0567	0.0664	0.049	0.0404	0.0371	0.0465	0.0423	0.0263		24.4	0.0579	0.0682	0.0422	0.0406	0.0377	0.0463	0.043	0.0194
24.6	0.06921	0.06927	0.03174	0.04081	0.04155	0.04947	0.03693	0.02791		24.6	0.0579	0.068	0.0438	0.0411	0.0377	0.0452	0.0422	0.0232		0.0426	0.0445	0.0453	0.0374	0.0346	0.0432	0.0383	0.0347		0.0563	0.0663	0.0487	0.0401	0.037	0.0461	0.0421	0.0217		24.6	0.0583	0.0683	0.0432	0.0413	0.0373	0.0446	0.0422	0.0193
24.8	0.06461	0.07117	0.03129	0.03836	0.03905	0.04907	0.04058	0.02486		24.8	0.0579	0.0674	0.0446	0.0406	0.0372	0.0445	0.0418	0.0221		0.0423	0.0447	0.0449	0.0373	0.0345	0.043	0.0381	0.0345		0.0563	0.0657	0.0487	0.04	0.0368	0.0457	0.0417	0.0236		24.8	0.0577	0.0678	0.0435	0.0411	0.0369	0.0438	0.0416	0.0222
25	0.06586	0.06962	0.03109	0.03606	0.04335	0.04432	0.04208	0.02516		25	0.0575	0.0674	0.0452	0.0402	0.037	0.0444	0.0421	0.0184		0.0417	0.0447	0.0448	0.0372	0.0343	0.0427	0.0381	0.0343		0.0567	0.0652	0.0487	0.04	0.0367	0.0452	0.0413	0.0259		25	0.0574	0.0668	0.0426	0.0408	0.0365	0.0441	0.0417	0.0243
25.2	0.06271	0.06442	0.03309	0.03996	0.04475	0.04727	0.03873	0.02496		25.2	0.0571	0.0672	0.0444	0.0402	0.0366	0.045	0.0428	0.0202		0.0418	0.0441	0.0449	0.037	0.0341	0.0426	0.0379	0.0341		0.0564	0.0649	0.0483	0.0399	0.0364	0.0451	0.0411	0.0264		25.2	0.0571	0.0669	0.0429	0.0403	0.0364	0.0458	0.0431	0.0232
25.4	0.06366	0.06572	0.03154	0.03616	0.0414	0.05037	0.03878	0.02496		25.4	0.0574	0.0667	0.044	0.0398	0.0364	0.0458	0.0432	0.0223		0.0419	0.0438	0.0447	0.0367	0.034	0.0426	0.0375	0.0339		0.0564	0.0647	0.0484	0.0397	0.0362	0.0451	0.0412	0.022		25.4	0.057	0.0672	0.0434	0.0398	0.0362	0.0475	0.0439	0.0217
25.6	0.06291	0.06462	0.03019	0.03946	0.04295	0.04717	0.04038	0.02716		25.6	0.057	0.0663	0.044	0.0395	0.0362	0.0459	0.043	0.0215		0.0414	0.0439	0.0442	0.0367	0.0337	0.0424	0.0374	0.0338		0.0563	0.0642	0.0484	0.0395	0.036	0.0452	0.0413	0.0231		25.6	0.057	0.0662	0.0432	0.0394	0.0361	0.0483	0.043	0.0228
25.8	0.06586	0.06857	0.03134	0.03446	0.0444	0.04312	0.03753	0.02371		25.8	0.0566	0.0654	0.0439	0.0396	0.0362	0.046	0.0425	0.0191		0.0413	0.0439	0.044	0.0367	0.0336	0.0422	0.0374	0.0337		0.0559	0.0642	0.0483	0.0395	0.0359	0.0452	0.0412	0.0252		25.8	0.0569	0.0657	0.0431	0.0393	0.0365	0.0482	0.0417	0.0242
26	0.06616	0.06957	0.03199	0.03601	0.0384	0.04022	0.03778	0.02631		26	0.0567	0.0657	0.0442	0.0397	0.0366	0.0455	0.042	0.022		0.0406	0.0433	0.0443	0.0363	0.0336	0.042	0.0374	0.0336		0.0553	0.0636	0.0481	0.0393	0.0359	0.0451	0.0411	0.0254		26	0.0566	0.0658	0.0425	0.0394	0.0371	0.0471	0.0412	0.0238
26.2	0.06071	0.06967	0.03084	0.03621	0.03635	0.04492	0.03953	0.02496		26.2	0.0561	0.0654	0.0441	0.0397	0.0366	0.0447	0.0414	0.0233		0.0408	0.043	0.0439	0.0361	0.0333	0.0418	0.037	0.0334		0.0551	0.0638	0.0479	0.0394	0.036	0.0449	0.0408	0.0221		26.2	0.0564	0.0657	0.0427	0.0392	0.0369	0.046	0.0412	0.0196
26.4	0.06276	0.07107	0.03059	0.03476	0.0376	0.04987	0.03623	0.02441		26.4	0.0562	0.065	0.0439	0.0397	0.0365	0.0446	0.0412	0.0215		0.0408	0.0429	0.0438	0.0361	0.0332	0.0419	0.0368	0.0334		0.0546	0.0632	0.0475	0.0391	0.0359	0.0446	0.0406	0.0233		26.4	0.0569	0.0647	0.0424	0.0395	0.0364	0.0447	0.0415	0.021
26.6	0.06461	0.06337	0.03094	0.03766	0.0405	0.04397	0.03733	0.02451		26.6	0.0563	0.0645	0.0436	0.0394	0.0362	0.0443	0.0415	0.0179		0.0407	0.0431	0.0432	0.0358	0.033	0.0415	0.0368	0.0332		0.055	0.0632	0.0475	0.039	0.0358	0.0445	0.0404	0.0264		26.6	0.0566	0.0646	0.0416	0.0403	0.036	0.0439	0.0418	0.0241
26.8	0.06291	0.06372	0.02989	0.03656	0.047	0.04287	0.03568	0.02191		26.8	0.0561	0.0646	0.0434	0.0395	0.0358	0.0443	0.0418	0.0197		0.04	0.0429	0.0432	0.0358	0.0329	0.0414	0.0366	0.033		0.0553	0.0632	0.0474	0.0389	0.0356	0.0443	0.0404	0.025		26.8	0.0562	0.0652	0.0414	0.0406	0.0357	0.0437	0.0414	0.0231
27	0.05966	0.06822	0.03214	0.03841	0.0413	0.04377	0.03543	0.02221		27	0.0559	0.0646	0.0434	0.0395	0.0358	0.0443	0.0418	0.0222		0.0402	0.0427	0.0433	0.0354	0.0326	0.041	0.0365	0.0329		0.0548	0.0626	0.0471	0.039	0.0354	0.0443	0.0404	0.0205		27	0.0561	0.0654	0.0422	0.0401	0.0358	0.0436	0.0409	0.0231
27.2	0.06446	0.06877	0.02984	0.03771	0.0394	0.04657	0.03998	0.02356		27.2	0.056	0.0646	0.0436	0.0394	0.0358	0.0443	0.0415	0.0178		0.0406	0.0429	0.043	0.0352	0.0326	0.0409	0.0362	0.0327		0.0548	0.0624	0.0473	0.0389	0.0354	0.0443	0.0404	0.0242		27.2	0.0561	0.0649	0.0428	0.0397	0.0357	0.0445	0.0412	0.0197
27.4	0.06561	0.06682	0.03174	0.03806	0.03765	0.04262	0.03428	0.02361		27.4	0.0559	0.0641	0.0436	0.0392	0.0359	0.0443	0.0413	0.0184		0.0402	0.0425	0.0429	0.0354	0.0324	0.0409	0.036	0.0326		0.0547	0.0624	0.0475	0.0387	0.0355	0.0441	0.0401	0.0254		27.4	0.0563	0.065	0.0427	0.0391	0.0355	0.0457	0.0416	0.0239
27.6	0.06211	0.07087	0.03374	0.03861	0.0442	0.04192	0.04008	0.02441		27.6	0.0558	0.064	0.0436	0.0388	0.0357	0.0444	0.0412	0.0219		0.04	0.0422	0.043	0.0351	0.0322	0.0407	0.0361	0.0325		0.0545	0.0623	0.0471	0.0387	0.0354	0.044	0.04	0.0258		27.6	0.0562	0.0647	0.0423	0.0386	0.0353	0.0465	0.0418	0.0235
27.8	0.06216	0.06657	0.02934	0.03636	0.0425	0.04047	0.03368	0.02471		27.8	0.0557	0.0639	0.0434	0.0388	0.0356	0.0443	0.0413	0.0226		0.04	0.0416	0.0428	0.0351	0.0322	0.0407	0.036	0.0323		0.0542	0.0621	0.0467	0.0386	0.0352	0.044	0.04	0.021		27.8	0.056	0.0643	0.042	0.0387	0.0354	0.0465	0.0417	0.02
28	0.06066	0.06622	0.03049	0.03886	0.04095	0.04487	0.03913	0.02276		28	0.0555	0.0637	0.0432	0.0392	0.0356	0.0443	0.0415	0.0204		0.0395	0.0415	0.0425	0.0351	0.032	0.0407	0.0358	0.0322		0.0543	0.0617	0.0466	0.0385	0.0352	0.0439	0.04	0.0236		28	0.0559	0.0637	0.0419	0.0391	0.0358	0.046	0.0413	0.0213
28.2	0.06221	0.06537	0.03129	0.03481	0.03705	0.04502	0.03293	0.02611		28.2	0.0555	0.0633	0.043	0.0391	0.0356	0.044	0.0412	0.0188		0.0391	0.0421	0.0419	0.0347	0.0321	0.0404	0.0357	0.0321		0.054	0.0609	0.0466	0.0384	0.035	0.0439	0.04	0.0258		28.2	0.0556	0.0636	0.0419	0.0392	0.0359	0.0451	0.0409	0.024
28.4	0.06071	0.06457	0.03234	0.03716	0.03525	0.04107	0.04073	0.02276		28.4	0.0553	0.063	0.043	0.0391	0.0356	0.0439	0.0407	0.0206		0.0391	0.0417	0.0418	0.0344	0.032	0.0402	0.0355	0.032		0.0539	0.0605	0.0464	0.0382	0.0349	0.0438	0.0397	0.0248		28.4	0.0552	0.0634	0.0415	0.0391	0.0359	0.0444	0.0407	0.0256
28.6	0.06111	0.06277	0.03239	0.03946	0.0409	0.04297	0.03578	0.02521		28.6	0.0551	0.063	0.0431	0.0387	0.0354	0.0437	0.0407	0.0233		0.0392	0.0412	0.042	0.0342	0.0317	0.0397	0.0353	0.032		0.0537	0.0602	0.0462	0.0382	0.0349	0.0436	0.0396	0.0206		28.6	0.055	0.0629	0.0414	0.0394	0.0356	0.0437	0.0408	0.0234
28.8	0.06111	0.05982	0.02999	0.03326	0.0371	0.04502	0.03608	0.02321		28.8	0.0548	0.0631	0.043	0.0386	0.0355	0.0437	0.041	0.0215		0.0389	0.0412	0.0417	0.0342	0.0313	0.0396	0.0351	0.0319		0.0536	0.0603	0.0461	0.0381	0.0348	0.0434	0.0396	0.023		28.8	0.055	0.0633	0.0411	0.0393	0.0354	0.0434	0.0409	0.0185
29	0.06246	0.06117	0.02999	0.03876	0.03765	0.04407	0.03348	0.02311		29	0.0549	0.0631	0.0429	0.0385	0.0352	0.0438	0.0411	0.0184		0.0389	0.041	0.0417	0.0341	0.0311	0.0398	0.0349	0.0316		0.0531	0.06	0.0458	0.038	0.0348	0.0432	0.0394	0.025		29	0.0549	0.0632	0.0412	0.0391	0.0352	0.0437	0.0408	0.0205
29.2	0.05706	0.06727	0.03174	0.03406	0.0342	0.04207	0.03653	0.02496		29.2	0.055	0.0627	0.0427	0.0386	0.0352	0.0438	0.041	0.0194		0.039	0.0408	0.0416	0.0338	0.0313	0.0396	0.0349	0.0313		0.0534	0.0602	0.046	0.0379	0.0346	0.0431	0.0393	0.0257		29.2	0.0553	0.0626	0.0417	0.0387	0.0349	0.0441	0.0406	0.0241
29.4	0.06121	0.06727	0.02949	0.03786	0.0358	0.04107	0.03613	0.02216		29.4	0.0549	0.0622	0.0425	0.0386	0.0351	0.0437	0.0406	0.0226		0.039	0.0412	0.0413	0.034	0.0311	0.0394	0.0347	0.0312		0.0534	0.0601	0.046	0.0377	0.0345	0.043	0.0394	0.0203		29.4	0.0549	0.0626	0.0417	0.0383	0.0348	0.0445	0.0406	0.0244
29.6	0.05911	0.06512	0.03379	0.03436	0.0394	0.04022	0.03458	0.02436		29.6	0.0547	0.0619	0.0424	0.0385	0.035	0.0436	0.0405	0.023		0.0386	0.0406	0.0413	0.0339	0.031	0.0393	0.0347	0.0313		0.0532	0.0599	0.0459	0.0378	0.0344	0.0431	0.0392	0.0216		29.6	0.0547	0.0628	0.0416	0.038	0.0346	0.045	0.0406	0.021
29.8	0.06011	0.06682	0.03284	0.03486	0.0406	0.04437	0.03343	0.02131		29.8	0.0542	0.0621	0.0427	0.0385	0.0352	0.0435	0.0405	0.0212		0.039	0.0407	0.0416	0.0337	0.0311	0.0392	0.0347	0.0313		0.053	0.0601	0.0457	0.0378	0.0343	0.043	0.0391	0.0245		29.8	0.0545	0.0625	0.0416	0.0379	0.0349	0.0449	0.0409	0.0216
30	0.05966	0.07052	0.02889	0.03951	0.04505	0.04197	0.03393	0.02361		30	0.0541	0.0619	0.0427	0.0383	0.0351	0.0433	0.0406	0.0179		0.0384	0.0405	0.0412	0.0337	0.031	0.0391	0.0346	0.0312		0.0528	0.0596	0.0455	0.0378	0.0344	0.043	0.0389	0.0254		30	0.0548	0.0622	0.0414	0.0382	0.0348	0.0446	0.0408	0.0236
30.2	0.06161	0.07612	0.02794	0.03181	0.04165	0.03877	0.03548	0.02586		30.2	0.054	0.0618	0.0424	0.0383	0.035	0.0434	0.0405	0.0217		0.0383	0.0404	0.0412	0.0337	0.0305	0.0393	0.0343	0.031		0.0525	0.0592	0.0454	0.0376	0.0344	0.043	0.0389	0.0213		30.2	0.0543	0.0615	0.041	0.0386	0.0348	0.0443	0.0405	0.0247
30.4	0.06101	0.06772	0.03264	0.03846	0.03925	0.04107	0.03428	0.02436		30.4	0.054	0.0612	0.0421	0.0381	0.0348	0.0433	0.0403	0.0223		0.0376	0.0404	0.041	0.0333	0.0305	0.039	0.0344	0.0309		0.0522	0.0591	0.0453	0.0374	0.0342	0.043	0.0388	0.0222		30.4	0.0541	0.0611	0.041	0.0384	0.0349	0.0439	0.0401	0.0199
30.6	0.05826	0.07232	0.03029	0.03391	0.041	0.04182	0.04083	0.02356		30.6	0.0537	0.0608	0.042	0.038	0.0347	0.0432	0.0402	0.0168		0.0376	0.0397	0.0407	0.033	0.0304	0.0388	0.034	0.0306		0.0521	0.0587	0.0451	0.0373	0.0341	0.0429	0.0388	0.0248		30.6	0.0541	0.0608	0.0409	0.0382	0.0349	0.0435	0.0399	0.0206
30.8	0.06001	0.07132	0.03089	0.03396	0.03875	0.04072	0.02983	0.02346		30.8	0.0539	0.0602	0.0419	0.0379	0.0346	0.043	0.04	0.0183		0.0374	0.0398	0.0404	0.0328	0.0304	0.0386	0.034	0.0305		0.0519	0.0583	0.0447	0.0372	0.0339	0.0426	0.0388	0.0245		30.8	0.0539	0.0607	0.0409	0.038	0.0348	0.0432	0.0402	0.0221
31	0.05866	0.07052	0.02904	0.03381	0.03685	0.04342	0.03828	0.02376		31	0.0536	0.0605	0.0418	0.0378	0.0346	0.0429	0.0399	0.0202		0.0375	0.0394	0.0399	0.0327	0.0301	0.0383	0.0337	0.0305		0.052	0.0582	0.0445	0.037	0.0338	0.0424	0.0385	0.02		31	0.0536	0.0602	0.0408	0.0376	0.0345	0.0431	0.0402	0.0219
31.2	0.05781	0.07362	0.02839	0.03061	0.0382	0.04752	0.02913	0.02351		31.2	0.0537	0.0601	0.0418	0.0376	0.0345	0.0427	0.0398	0.0226		0.0375	0.0392	0.0399	0.0327	0.03	0.0383	0.0337	0.0305		0.0521	0.0583	0.0445	0.0369	0.0338	0.0422	0.0384	0.0224		31.2	0.0536	0.0602	0.0406	0.0378	0.0343	0.0432	0.0401	0.0226
31.4	0.05936	0.07617	0.02894	0.03806	0.0407	0.04087	0.03713	0.02391		31.4	0.0536	0.0599	0.0419	0.0376	0.0344	0.0425	0.0398	0.0209		0.0375	0.0393	0.0399	0.0323	0.0299	0.0379	0.0335	0.0302		0.052	0.0578	0.0444	0.0368	0.0336	0.0422	0.0383	0.0241		31.4	0.0536	0.0604	0.0407	0.0376	0.0342	0.0433	0.0399	0.02
31.6	0.05861	0.06992	0.02784	0.03126	0.04035	0.03712	0.03233	0.02171		31.6	0.0534	0.0595	0.0417	0.0376	0.0342	0.0424	0.0398	0.0178		0.0374	0.0385	0.0398	0.0324	0.0297	0.0378	0.0332	0.0302		0.0521	0.058	0.0443	0.0368	0.0336	0.0421	0.0383	0.025		31.6	0.0537	0.0598	0.041	0.0376	0.034	0.0431	0.0397	0.0222
31.8	0.05646	0.07137	0.02949	0.03446	0.04045	0.03722	0.02918	0.02281		31.8	0.0529	0.0592	0.0418	0.0376	0.0342	0.0426	0.0397	0.0199		0.0374	0.0389	0.0399	0.0324	0.0295	0.0377	0.0332	0.03		0.0516	0.0576	0.0442	0.0369	0.0335	0.042	0.0383	0.0217		31.8	0.0533	0.0594	0.0408	0.0375	0.0339	0.0431	0.0396	0.0248
32	0.05936	0.07292	0.02984	0.03631	0.03635	0.04052	0.03813	0.02256		32	0.0526	0.0593	0.0417	0.0375	0.0343	0.0424	0.0397	0.0227		0.0369	0.0386	0.0397	0.0322	0.0295	0.0377	0.033	0.0298		0.0517	0.0577	0.0443	0.0369	0.0337	0.0419	0.0382	0.0214		32	0.0529	0.0595	0.0407	0.0375	0.0341	0.0432	0.0397	0.0219
32.2	0.05726	0.06657	0.02979	0.03276	0.03975	0.04292	0.03138	0.02606		32.2	0.0525	0.0587	0.0415	0.0375	0.0343	0.0424	0.0394	0.0218		0.0369	0.0389	0.0395	0.0323	0.0295	0.0378	0.0332	0.0297		0.0513	0.0574	0.0438	0.0367	0.0336	0.0418	0.0379	0.0243		32.2	0.0524	0.0591	0.0407	0.0374	0.0343	0.043	0.0399	0.0188
32.4	0.05766	0.06392	0.02984	0.03556	0.0365	0.04242	0.03693	0.02411		32.4	0.0524	0.0585	0.0413	0.0374	0.0344	0.0422	0.0394	0.0176		0.0366	0.0383	0.0392	0.032	0.0294	0.0374	0.0331	0.0297		0.0509	0.0569	0.0435	0.0367	0.0335	0.0419	0.0378	0.0251		32.4	0.0524	0.0587	0.0407	0.0373	0.0344	0.0426	0.0398	0.0217
32.6	0.05781	0.06422	0.03064	0.03301	0.039	0.03887	0.03263	0.02371		32.6	0.0519	0.0582	0.041	0.0372	0.0343	0.042	0.0392	0.0191		0.0364	0.0386	0.0393	0.0319	0.0292	0.0376	0.0329	0.0297		0.0509	0.0565	0.0435	0.0364	0.0334	0.0417	0.0379	0.0218		32.6	0.0518	0.0585	0.0402	0.0374	0.0342	0.0425	0.0396	0.0236
32.8	0.05606	0.06102	0.03024	0.03281	0.0426	0.03952	0.03323	0.02281		32.8	0.0516	0.0579	0.0412	0.0372	0.0342	0.0418	0.0391	0.0222		0.0361	0.0383	0.0389	0.0316	0.029	0.0372	0.0329	0.0296		0.0504	0.0562	0.0433	0.0363	0.0333	0.0416	0.0378	0.0211		32.8	0.0517	0.0583	0.0399	0.0375	0.0341	0.0424	0.0393	0.0245
33	0.05911	0.05952	0.03084	0.03396	0.0392	0.03977	0.03233	0.02136		33	0.0513	0.0581	0.0411	0.037	0.034	0.0416	0.0391	0.0211		0.0361	0.0386	0.039	0.0316	0.0287	0.0371	0.0325	0.0295		0.0501	0.0562	0.043	0.0362	0.0331	0.0415	0.0377	0.0238		33	0.0514	0.0582	0.0396	0.0371	0.0338	0.0422	0.039	0.0218
33.2	0.05706	0.05987	0.02869	0.03316	0.0393	0.04342	0.03408	0.02596		33.2	0.0514	0.0578	0.0407	0.037	0.0338	0.0414	0.0389	0.0195		0.0362	0.0381	0.0389	0.0311	0.0286	0.0367	0.0324	0.0293		0.05	0.0564	0.0429	0.036	0.033	0.0411	0.0374	0.0253		33.2	0.0513	0.0582	0.0393	0.0368	0.0336	0.042	0.0389	0.0201
33.4	0.05566	0.05787	0.02819	0.03431	0.0389	0.03677	0.03443	0.02316		33.4	0.0513	0.0578	0.0403	0.0368	0.0336	0.0413	0.0388	0.0175		0.0363	0.0381	0.0389	0.0313	0.0286	0.0368	0.0322	0.0291		0.0499	0.0558	0.0428	0.0358	0.033	0.0409	0.0373	0.0232		33.4	0.0513	0.0583	0.0392	0.0368	0.0335	0.0417	0.039	0.0227
33.6	0.05606	0.05802	0.02864	0.02896	0.0377	0.04067	0.03203	0.02311		33.6	0.0509	0.0575	0.04	0.0367	0.0335	0.0412	0.0387	0.0211		0.036	0.0379	0.0386	0.0312	0.0284	0.0366	0.0321	0.029		0.0499	0.0557	0.0427	0.0358	0.0327	0.0408	0.0371	0.0212		33.6	0.0508	0.058	0.039	0.0368	0.0334	0.0415	0.039	0.0241
33.8	0.05616	0.05917	0.02969	0.03311	0.0391	0.03682	0.03008	0.02276		33.8	0.0507	0.0569	0.0401	0.0366	0.0334	0.0412	0.0387	0.0222		0.036	0.0377	0.0385	0.0312	0.0284	0.0367	0.032	0.0289		0.0494	0.0554	0.0423	0.0358	0.0327	0.0407	0.037	0.0235		33.8	0.0509	0.0578	0.039	0.0368	0.0332	0.0416	0.0388	0.0229
34	0.05671	0.06047	0.03054	0.03286	0.0429	0.03922	0.03838	0.02316		34	0.0504	0.057	0.0402	0.0365	0.0333	0.0411	0.0385	0.0176		0.0358	0.0373	0.0384	0.031	0.0285	0.0365	0.0321	0.0288		0.0492	0.0553	0.0424	0.0357	0.0326	0.0406	0.0371	0.025		34	0.0505	0.0574	0.0386	0.0366	0.033	0.0415	0.0386	0.0206
34.2	0.05486	0.05972	0.02864	0.03146	0.0395	0.03892	0.02863	0.02171		34.2	0.0503	0.0571	0.0401	0.0364	0.0333	0.041	0.0384	0.0185		0.0357	0.0375	0.0383	0.031	0.0283	0.0364	0.0319	0.0288		0.0491	0.0547	0.0423	0.0356	0.0326	0.0405	0.037	0.0223		34.2	0.0503	0.057	0.0386	0.0364	0.033	0.0416	0.0383	0.0213
34.4	0.05591	0.05852	0.02769	0.03331	0.0366	0.03942	0.03468	0.02446		34.4	0.05	0.0564	0.0397	0.0363	0.0331	0.0408	0.0383	0.0193		0.0352	0.037	0.038	0.0308	0.0281	0.0364	0.0318	0.0287		0.049	0.0547	0.042	0.0355	0.0325	0.0405	0.0368	0.0206		34.4	0.0502	0.0566	0.0385	0.0363	0.033	0.0414	0.0384	0.0216
34.6	0.05341	0.05747	0.02889	0.03051	0.03725	0.04417	0.03183	0.02241		34.6	0.0498	0.0559	0.0393	0.0361	0.0329	0.0407	0.0381	0.0195		0.0352	0.0372	0.0381	0.0306	0.028	0.0363	0.0316	0.0286		0.0485	0.0542	0.0417	0.0354	0.0324	0.0404	0.0367	0.0232		34.6	0.0498	0.0563	0.0385	0.0363	0.033	0.0411	0.0384	0.0228
34.8	0.05356	0.05652	0.02864	0.03361	0.0397	0.03727	0.03123	0.02036		34.8	0.0498	0.0558	0.0393	0.0361	0.0329	0.0406	0.038	0.0195		0.0349	0.0371	0.0376	0.0303	0.0279	0.036	0.0315	0.0284		0.0483	0.0544	0.0416	0.0352	0.0323	0.0403	0.0367	0.0244		34.8	0.0497	0.0558	0.0386	0.0363	0.0329	0.0408	0.0384	0.0246
35	0.05476	0.05482	0.02704	0.02651	0.04025	0.03922	0.03588	0.02171		35	0.0492	0.0556	0.0394	0.0362	0.0328	0.0404	0.038	0.0206		0.0348	0.0365	0.0377	0.0304	0.0277	0.0359	0.0312	0.0283		0.0483	0.0537	0.0414	0.035	0.0321	0.04	0.0365	0.022		35	0.0493	0.056	0.0383	0.0361	0.0327	0.0407	0.0382	0.0238
35.2	0.05366	0.05547	0.02954	0.03546	0.0382	0.03662	0.02703	0.02286		35.2	0.0495	0.0555	0.0395	0.036	0.0327	0.0402	0.0379	0.0217		0.035	0.0369	0.0376	0.0301	0.0275	0.0356	0.0313	0.0283		0.0481	0.0539	0.0414	0.035	0.032	0.0398	0.0363	0.0199		35.2	0.049	0.0554	0.038	0.0359	0.0324	0.0406	0.038	0.0199
35.4	0.05456	0.05482	0.03084	0.03031	0.04155	0.03972	0.03533	0.02326		35.4	0.049	0.0553	0.039	0.0359	0.0326	0.04	0.0377	0.0174		0.0348	0.0362	0.0373	0.0301	0.0276	0.0357	0.0311	0.0281		0.048	0.0539	0.0413	0.0348	0.0319	0.0396	0.0361	0.0228		35.4	0.0494	0.0553	0.038	0.0358	0.0322	0.0406	0.0378	0.0222
35.6	0.05421	0.05647	0.03009	0.03031	0.03455	0.03802	0.03248	0.02221		35.6	0.0489	0.0553	0.0388	0.0357	0.0324	0.04	0.0375	0.0156		0.035	0.0359	0.0373	0.0301	0.0274	0.0354	0.031	0.028		0.0478	0.0535	0.041	0.0348	0.0318	0.0396	0.0361	0.0243		35.6	0.049	0.0551	0.0372	0.0356	0.0322	0.0404	0.0376	0.023
35.8	0.05401	0.05667	0.02969	0.03036	0.0313	0.04117	0.03283	0.01891		35.8	0.0487	0.0549	0.0386	0.0355	0.0324	0.0398	0.0375	0.0192		0.0345	0.0359	0.037	0.0299	0.0273	0.0352	0.031	0.028		0.0475	0.0529	0.0409	0.0348	0.0316	0.0395	0.036	0.0219		35.8	0.0485	0.0547	0.0373	0.0356	0.032	0.0402	0.0375	0.023
36	0.05351	0.05817	0.02669	0.02736	0.0355	0.04097	0.03093	0.02306		36	0.0482	0.0545	0.0386	0.0353	0.0323	0.0397	0.0374	0.0219		0.0343	0.0357	0.0368	0.03	0.0273	0.0354	0.0309	0.0279		0.0475	0.0528	0.0409	0.0346	0.0316	0.0395	0.036	0.0195		36	0.0483	0.0545	0.0373	0.0355	0.032	0.0399	0.0374	0.0191
36.2	0.05301	0.05837	0.02724	0.03006	0.0365	0.03422	0.03173	0.02161		36.2	0.0481	0.0538	0.0387	0.0353	0.0321	0.0396	0.0373	0.0206		0.0341	0.0351	0.0367	0.0296	0.0271	0.0351	0.0308	0.0279		0.0468	0.0521	0.0405	0.0345	0.0315	0.0394	0.0358	0.0226		36.2	0.0481	0.0536	0.0376	0.0351	0.032	0.0397	0.0372	0.0199
36.4	0.05176	0.05667	0.02779	0.03121	0.03755	0.03602	0.03103	0.02226		36.4	0.0477	0.0532	0.0384	0.0352	0.032	0.0394	0.0371	0.0185		0.0338	0.0351	0.0365	0.0295	0.0271	0.0348	0.0307	0.0277		0.0467	0.0516	0.0403	0.0343	0.0313	0.0393	0.0357	0.0236		36.4	0.0475	0.0533	0.0376	0.0349	0.0316	0.0397	0.0371	0.0222
36.6	0.05281	0.05737	0.02914	0.03061	0.03965	0.03572	0.03368	0.02046		36.6	0.0473	0.0527	0.038	0.035	0.0318	0.0392	0.0367	0.0188		0.0334	0.0349	0.0361	0.0293	0.0267	0.0347	0.0305	0.0276		0.0461	0.0512	0.04	0.0342	0.0312	0.039	0.0356	0.02		36.6	0.047	0.0529	0.0369	0.0347	0.0315	0.0397	0.0369	0.0228
36.8	0.05096	0.05397	0.02829	0.02821	0.0418	0.03792	0.02778	0.02231		36.8	0.0466	0.0523	0.0378	0.0348	0.0316	0.0392	0.0368	0.0223		0.033	0.0344	0.036	0.0291	0.0265	0.0346	0.0303	0.0275		0.0458	0.0509	0.0397	0.034	0.0311	0.0388	0.0355	0.0197		36.8	0.0467	0.0523	0.0368	0.0346	0.0313	0.0396	0.0369	0.0207
37	0.05161	0.05692	0.03119	0.03001	0.04035	0.03852	0.03528	0.02341		37	0.0464	0.052	0.0379	0.0345	0.0315	0.039	0.0368	0.0219		0.0329	0.0344	0.0357	0.0287	0.0263	0.0342	0.03	0.0273		0.0453	0.0506	0.0395	0.0338	0.0309	0.0386	0.0353	0.0224		37	0.0463	0.052	0.0367	0.0346	0.0311	0.0392	0.0367	0.0187
37.2	0.05136	0.05562	0.02674	0.02946	0.03655	0.03967	0.02833	0.02151		37.2	0.0459	0.0519	0.0379	0.0344	0.0312	0.0388	0.0368	0.0171		0.0325	0.0341	0.0353	0.0285	0.0261	0.0339	0.0298	0.0271		0.045	0.0502	0.0393	0.0335	0.0307	0.0383	0.0351	0.0234		37.2	0.0458	0.0518	0.0367	0.0342	0.031	0.039	0.0365	0.0218
37.4	0.05211	0.05352	0.02724	0.02906	0.03165	0.04022	0.03183	0.02061		37.4	0.0458	0.052	0.0377	0.0342	0.031	0.0385	0.0364	0.0187		0.0324	0.0342	0.0352	0.0283	0.0258	0.0337	0.0296	0.0269		0.0449	0.05	0.0392	0.0333	0.0304	0.0381	0.0348	0.022		37.4	0.0457	0.0515	0.0366	0.034	0.0305	0.0388	0.0362	0.0234
37.6	0.04886	0.05427	0.02629	0.02926	0.0303	0.03622	0.02833	0.02031		37.6	0.0457	0.0517	0.0372	0.034	0.0308	0.0383	0.0359	0.0224		0.0324	0.0336	0.0349	0.028	0.0256	0.0335	0.0294	0.0268		0.0446	0.0498	0.039	0.0331	0.0302	0.0379	0.0346	0.0209		37.6	0.0455	0.0516	0.0362	0.034	0.0305	0.0385	0.0359	0.0219
37.8	0.04936	0.05792	0.02549	0.02761	0.03255	0.04397	0.03038	0.02161		37.8	0.0456	0.0513	0.037	0.0339	0.0306	0.038	0.0356	0.0199		0.0324	0.0337	0.0349	0.028	0.0255	0.0334	0.0292	0.0266		0.0443	0.0496	0.0386	0.033	0.03	0.0378	0.0344	0.021		37.8	0.0453	0.0516	0.0357	0.0336	0.0303	0.0384	0.0357	0.0191
38	0.05146	0.05577	0.02839	0.03071	0.0358	0.03782	0.03033	0.01976		38	0.0455	0.051	0.0369	0.0336	0.0305	0.0378	0.0355	0.0175		0.032	0.0334	0.0346	0.0278	0.0252	0.0332	0.0291	0.0264		0.0441	0.0495	0.0385	0.0328	0.0298	0.0377	0.0343	0.0224		38	0.0453	0.0513	0.0358	0.0334	0.03	0.0381	0.0355	0.0196
38.2	0.05051	0.05482	0.02594	0.02916	0.0417	0.03412	0.02743	0.02036		38.2	0.0455	0.0512	0.0371	0.0335	0.0303	0.0378	0.0355	0.0159		0.0319	0.0336	0.0347	0.0278	0.0251	0.0331	0.029	0.0263		0.0441	0.0492	0.0385	0.0327	0.0297	0.0374	0.0342	0.0231		38.2	0.0455	0.0515	0.036	0.0332	0.0299	0.038	0.0353	0.0214
38.4	0.04991	0.05397	0.02804	0.03106	0.04155	0.03232	0.03133	0.02236		38.4	0.045	0.0508	0.0371	0.0334	0.0301	0.0377	0.0355	0.0199		0.0317	0.0335	0.0345	0.0275	0.0249	0.0329	0.0288	0.0261		0.044	0.0488	0.0384	0.0325	0.0295	0.0373	0.034	0.022		38.4	0.0448	0.0512	0.0359	0.0333	0.0298	0.0379	0.0353	0.0224
38.6	0.05086	0.05632	0.02604	0.02721	0.0383	0.03342	0.03173	0.02486		38.6	0.0447	0.0508	0.037	0.0333	0.03	0.0377	0.0354	0.0209		0.0314	0.0332	0.0345	0.0274	0.0249	0.0328	0.0287	0.026		0.0435	0.049	0.0382	0.0324	0.0293	0.0372	0.0338	0.02		38.6	0.0448	0.0508	0.0359	0.0333	0.0296	0.0379	0.0352	0.0215
38.8	0.04966	0.05182	0.02634	0.03246	0.03655	0.03627	0.02848	0.02376		38.8	0.0447	0.0506	0.0368	0.0331	0.0298	0.0375	0.0352	0.0202		0.0315	0.0333	0.0345	0.0273	0.0245	0.0327	0.0284	0.0259		0.0432	0.0488	0.0379	0.0323	0.0292	0.0371	0.0337	0.0216		38.8	0.0449	0.0507	0.0356	0.033	0.0296	0.0377	0.035	0.0213
39	0.04826	0.05702	0.02679	0.02681	0.0349	0.03582	0.02863	0.02281		39	0.0445	0.0501	0.0366	0.0329	0.0297	0.0374	0.0349	0.0168		0.0312	0.0329	0.0342	0.027	0.0245	0.0325	0.0284	0.0258		0.0433	0.0487	0.0378	0.032	0.0291	0.0369	0.0335	0.0224		39	0.0445	0.0501	0.0354	0.0328	0.0295	0.0376	0.0348	0.0207
39.2	0.05046	0.05842	0.02584	0.02666	0.03575	0.03737	0.03263	0.02151		39.2	0.0445	0.0497	0.0363	0.0328	0.0296	0.0374	0.0347	0.0179		0.031	0.0325	0.0341	0.027	0.0243	0.0326	0.0281	0.0256		0.0433	0.0483	0.0376	0.0319	0.029	0.0368	0.0334	0.0223		39.2	0.0443	0.0497	0.0353	0.0325	0.0293	0.0375	0.0347	0.02
39.4	0.05321	0.05922	0.02664	0.02796	0.0401	0.03537	0.02783	0.02031		39.4	0.0441	0.0493	0.0359	0.0327	0.0295	0.0373	0.0347	0.0188		0.031	0.0325	0.0337	0.0268	0.0242	0.0324	0.0282	0.0254		0.0432	0.0478	0.0373	0.0318	0.0288	0.0367	0.0333	0.0187		39.4	0.044	0.0494	0.035	0.0324	0.0292	0.0376	0.0347	0.0204
39.6	0.04871	0.06377	0.02514	0.02551	0.03565	0.03582	0.02938	0.02126		39.6	0.044	0.0489	0.0359	0.0327	0.0294	0.0371	0.0347	0.0198		0.0304	0.0323	0.0334	0.0268	0.0242	0.0323	0.028	0.0253		0.043	0.0472	0.0372	0.0316	0.0286	0.0366	0.0331	0.0205		39.6	0.0439	0.0491	0.035	0.0326	0.029	0.0375	0.0347	0.0199
39.8	0.04911	0.05957	0.02679	0.03236	0.037	0.03377	0.02788	0.02091		39.8	0.044	0.0486	0.0359	0.0325	0.0293	0.0368	0.0346	0.0183		0.0305	0.0322	0.0333	0.0265	0.024	0.032	0.0279	0.0252		0.0425	0.0474	0.0371	0.0315	0.0285	0.0364	0.0331	0.0218		39.8	0.0437	0.0487	0.0349	0.0324	0.0289	0.037	0.0345	0.02
40	0.05041	0.05472	0.02634	0.02646	0.0366	0.03282	0.02713	0.01926		40	0.0438	0.0486	0.0358	0.0324	0.0293	0.0365	0.0343	0.0149		0.0304	0.0318	0.0331	0.0262	0.024	0.0318	0.0277	0.0253		0.0425	0.0472	0.037	0.0313	0.0285	0.0362	0.0329	0.0229		40	0.0436	0.0484	0.0347	0.0322	0.0288	0.0367	0.0341	0.0201
40.2	0.04881	0.05652	0.02629	0.02731	0.0347	0.04232	0.02643	0.02076		40.2	0.0436	0.0488	0.0357	0.0322	0.029	0.0363	0.034	0.0185		0.0304	0.0322	0.0331	0.0262	0.0238	0.0316	0.0275	0.0251		0.0426	0.0471	0.0369	0.0312	0.0284	0.036	0.0328	0.0216		40.2	0.0438	0.0487	0.0344	0.032	0.0286	0.0365	0.0337	0.0198
40.4	0.04841	0.05487	0.02774	0.02831	0.03295	0.03822	0.02903	0.02131		40.4	0.0435	0.0487	0.0355	0.0321	0.0289	0.0362	0.0339	0.0202		0.0301	0.0315	0.0329	0.0261	0.0235	0.0314	0.0273	0.025		0.0425	0.0475	0.0366	0.0311	0.0283	0.0358	0.0326	0.0192		40.4	0.0434	0.0487	0.0343	0.0319	0.0286	0.0365	0.0338	0.0204
40.6	0.04766	0.05667	0.02789	0.02756	0.0367	0.03607	0.02778	0.02241		40.6	0.0437	0.0484	0.0356	0.032	0.0289	0.0362	0.0339	0.0189		0.0303	0.0317	0.0331	0.0261	0.0235	0.0314	0.0273	0.0248		0.0424	0.047	0.0364	0.0311	0.0282	0.0358	0.0325	0.0205		40.6	0.0434	0.0486	0.0345	0.0318	0.0285	0.0364	0.034	0.0206
40.8	0.04721	0.06067	0.02794	0.03046	0.0309	0.03502	0.02973	0.02001		40.8	0.0437	0.0479	0.0356	0.032	0.0287	0.0362	0.0339	0.0153		0.0302	0.0315	0.0328	0.0258	0.0233	0.0312	0.0271	0.0246		0.0423	0.0467	0.0364	0.031	0.028	0.0356	0.0324	0.0217		40.8	0.0436	0.0482	0.0346	0.0318	0.0283	0.0363	0.034	0.0191
41	0.04751	0.05772	0.02654	0.02591	0.03615	0.03672	0.02633	0.02281		41	0.0433	0.0479	0.0354	0.032	0.0287	0.0361	0.0338	0.0171		0.0302	0.031	0.0328	0.0259	0.0234	0.0313	0.0271	0.0245		0.0423	0.0463	0.0365	0.0309	0.028	0.0356	0.0323	0.0228		41	0.0433	0.0477	0.0345	0.0319	0.0283	0.0362	0.0337	0.0184
41.2	0.04621	0.05632	0.02804	0.03086	0.0345	0.03347	0.02623	0.02276		41.2	0.043	0.0475	0.0353	0.032	0.0287	0.0361	0.0336	0.0181		0.0302	0.0308	0.0326	0.0258	0.0232	0.0311	0.0269	0.0244		0.042	0.046	0.0363	0.0309	0.028	0.0356	0.0322	0.0215		41.2	0.043	0.0473	0.0342	0.0316	0.0283	0.0362	0.0333	0.0203
41.4	0.04901	0.05722	0.02584	0.02681	0.03525	0.03517	0.03278	0.02186		41.4	0.0426	0.0469	0.0352	0.0319	0.0287	0.0358	0.0335	0.0188		0.0299	0.0305	0.0324	0.0258	0.0233	0.031	0.0271	0.0244		0.0416	0.0454	0.036	0.0308	0.028	0.0355	0.0321	0.0196		41.4	0.0424	0.0468	0.0341	0.0315	0.0283	0.0361	0.0332	0.0223
41.6	0.04616	0.05732	0.03019	0.02941	0.037	0.03737	0.02398	0.01911		41.6	0.0422	0.0464	0.0352	0.0317	0.0287	0.0357	0.0333	0.0209		0.0294	0.0302	0.032	0.0257	0.0231	0.031	0.0268	0.0243		0.0412	0.0449	0.0358	0.0307	0.0279	0.0354	0.0321	0.0201		41.6	0.042	0.0462	0.0341	0.0314	0.0283	0.0361	0.0333	0.0212
41.8	0.04751	0.05757	0.02759	0.02486	0.0409	0.03592	0.03008	0.02216		41.8	0.0417	0.046	0.0349	0.0315	0.0285	0.0355	0.0333	0.0208		0.0292	0.0301	0.0319	0.0256	0.0231	0.0309	0.0269	0.0243		0.0408	0.0445	0.0355	0.0305	0.0278	0.0351	0.032	0.0211		41.8	0.0414	0.0458	0.0338	0.0313	0.0283	0.0359	0.0335	0.0192
42	0.04651	0.05722	0.02664	0.02466	0.0368	0.03602	0.02663	0.02251		42	0.0411	0.0457	0.0345	0.0314	0.0283	0.0353	0.0332	0.0175		0.0288	0.0303	0.0316	0.0252	0.0229	0.0306	0.0267	0.0243		0.0403	0.0444	0.0352	0.0303	0.0277	0.035	0.0319	0.0223		42	0.0411	0.0458	0.0337	0.0312	0.028	0.0356	0.0333	0.0174
42.2	0.04701	0.05592	0.02599	0.02581	0.0363	0.03312	0.03088	0.02486		42.2	0.0408	0.0459	0.0341	0.0312	0.0282	0.0351	0.033	0.0165		0.0286	0.03	0.0316	0.025	0.0227	0.0304	0.0265	0.0241		0.0398	0.0443	0.035	0.0301	0.0274	0.0348	0.0317	0.0203		42.2	0.0407	0.0457	0.0333	0.031	0.0278	0.0352	0.0329	0.019
42.4	0.04481	0.05592	0.02489	0.02851	0.03995	0.03222	0.02598	0.02061		42.4	0.0406	0.046	0.0341	0.0309	0.028	0.0349	0.0328	0.0178		0.0284	0.0301	0.0314	0.0247	0.0224	0.03	0.0262	0.024		0.0397	0.0444	0.0349	0.0298	0.0273	0.0344	0.0315	0.0187		42.4	0.0407	0.0457	0.0333	0.0307	0.0276	0.0349	0.0325	0.0212
42.6	0.04421	0.05387	0.02749	0.02531	0.0327	0.03582	0.02778	0.02011		42.6	0.0408	0.0459	0.0342	0.0307	0.0278	0.0346	0.0326	0.0184		0.0286	0.0302	0.0313	0.0246	0.0222	0.0299	0.026	0.0239		0.0396	0.0445	0.0348	0.0297	0.0271	0.0342	0.0312	0.0204		42.6	0.0407	0.0458	0.0333	0.0304	0.0273	0.0348	0.0323	0.0214
42.8	0.04621	0.05542	0.02629	0.02531	0.03665	0.03572	0.02648	0.01981		42.8	0.041	0.0457	0.0342	0.0306	0.0275	0.0345	0.0325	0.0181		0.0284	0.0297	0.0311	0.0244	0.0219	0.0296	0.0257	0.0236		0.0397	0.0441	0.0348	0.0296	0.0269	0.0341	0.031	0.0207		42.8	0.0408	0.0456	0.0332	0.0303	0.0271	0.0348	0.0323	0.02
43	0.04456	0.05572	0.02804	0.02791	0.0339	0.03392	0.02718	0.01891		43	0.0408	0.0453	0.0339	0.0306	0.0273	0.0343	0.0323	0.0177		0.0285	0.0292	0.0312	0.0244	0.0219	0.0297	0.0257	0.0234		0.0397	0.0438	0.0347	0.0295	0.0267	0.034	0.0308	0.022		43	0.0409	0.0454	0.0332	0.0303	0.027	0.0347	0.0323	0.0182
43.2	0.04536	0.05662	0.02909	0.02731	0.034	0.03707	0.02763	0.02031		43.2	0.0404	0.0448	0.0337	0.0306	0.0272	0.0343	0.0321	0.0156		0.0284	0.0291	0.0309	0.0242	0.0217	0.0294	0.0255	0.0234		0.0397	0.0433	0.0346	0.0295	0.0266	0.034	0.0307	0.0205		43.2	0.0405	0.0448	0.0329	0.0305	0.0269	0.0345	0.0322	0.0187
43.4	0.04536	0.05717	0.02584	0.02271	0.03775	0.03212	0.02333	0.01926		43.4	0.0403	0.0443	0.0337	0.0305	0.0272	0.0343	0.0319	0.0165		0.0284	0.0286	0.0307	0.0244	0.0218	0.0296	0.0255	0.0232		0.0391	0.0427	0.0344	0.0294	0.0265	0.034	0.0307	0.0187		43.4	0.0403	0.0441	0.0329	0.0304	0.0269	0.0345	0.0319	0.0189
43.6	0.04526	0.05107	0.02519	0.02486	0.03545	0.03772	0.02873	0.02021		43.6	0.0399	0.0435	0.0337	0.0302	0.0271	0.0342	0.0318	0.019		0.028	0.0281	0.0304	0.0243	0.0216	0.0295	0.0254	0.0231		0.0386	0.042	0.0342	0.0293	0.0265	0.0339	0.0307	0.0199		43.6	0.0397	0.0433	0.0328	0.0303	0.0269	0.0346	0.0317	0.0185
43.8	0.04491	0.05017	0.02444	0.02501	0.03235	0.03412	0.02478	0.02171		43.8	0.0393	0.0427	0.0334	0.0302	0.027	0.0342	0.0318	0.02		0.0273	0.0277	0.0301	0.0241	0.0217	0.0294	0.0255	0.0231		0.0382	0.0417	0.034	0.0291	0.0264	0.0338	0.0306	0.0203		43.8	0.039	0.0427	0.0328	0.03	0.0268	0.0344	0.0317	0.0166
44	0.04366	0.05042	0.02784	0.02721	0.03295	0.03297	0.02868	0.02026		44	0.0384	0.0419	0.033	0.03	0.0269	0.034	0.0318	0.0197		0.0269	0.0272	0.0298	0.0239	0.0215	0.0292	0.0253	0.023		0.0375	0.0411	0.0336	0.0289	0.0263	0.0335	0.0305	0.0212		44	0.0384	0.0421	0.0325	0.0297	0.0266	0.0342	0.0317	0.018
44.2	0.04346	0.05117	0.02584	0.02486	0.02755	0.03732	0.02468	0.01836		44.2	0.0379	0.0416	0.0327	0.0297	0.0268	0.0337	0.0317	0.0147		0.0264	0.0273	0.0295	0.0236	0.0213	0.0289	0.0251	0.023		0.0371	0.0405	0.0332	0.0287	0.0261	0.0332	0.0303	0.0195		44.2	0.0377	0.0417	0.032	0.0295	0.0265	0.0339	0.0316	0.0198
44.4	0.04191	0.04917	0.02734	0.02271	0.03405	0.03962	0.02978	0.02006		44.4	0.0374	0.0415	0.0325	0.0293	0.0266	0.0332	0.0315	0.0146		0.0259	0.0272	0.0291	0.0232	0.021	0.0285	0.0248	0.0229		0.0367	0.0405	0.0329	0.0284	0.0259	0.0329	0.0301	0.0183		44.4	0.0374	0.0415	0.0317	0.0291	0.0263	0.0336	0.0313	0.0204
44.6	0.04236	0.05162	0.02814	0.02316	0.0322	0.03412	0.02638	0.01831		44.6	0.0371	0.0415	0.0323	0.029	0.0264	0.0329	0.0312	0.0165		0.0255	0.0273	0.0288	0.0228	0.0207	0.0281	0.0246	0.0227		0.0363	0.0402	0.0326	0.0281	0.0257	0.0326	0.0299	0.0197		44.6	0.0371	0.0415	0.0313	0.0288	0.026	0.0331	0.0311	0.0188
44.8	0.04181	0.05282	0.02499	0.02526	0.02795	0.03042	0.02383	0.02191		44.8	0.0374	0.0413	0.0322	0.0287	0.026	0.0326	0.0308	0.0176		0.0255	0.027	0.0287	0.0225	0.0204	0.0278	0.0242	0.0225		0.0363	0.0402	0.0326	0.0279	0.0254	0.0324	0.0296	0.0201		44.8	0.0372	0.0414	0.0314	0.0286	0.0257	0.0328	0.0309	0.0164
45	0.04161	0.05257	0.02919	0.02811	0.02945	0.02867	0.02663	0.02076		45	0.0375	0.041	0.032	0.0287	0.0258	0.0324	0.0306	0.0166		0.0254	0.0268	0.0285	0.0222	0.0201	0.0275	0.0239	0.0223		0.0364	0.0399	0.0325	0.0277	0.0251	0.0322	0.0293	0.0208		45	0.0374	0.0411	0.0313	0.0284	0.0253	0.0326	0.0306	0.018
45.2	0.04136	0.05282	0.02564	0.02381	0.0282	0.03562	0.02343	0.01986		45.2	0.0373	0.0408	0.0319	0.0288	0.0255	0.0323	0.0303	0.0164		0.0257	0.0266	0.0284	0.0221	0.0199	0.0273	0.0237	0.022		0.0364	0.0395	0.0324	0.0276	0.0249	0.032	0.0291	0.0198		45.2	0.0373	0.0408	0.0312	0.0284	0.025	0.0324	0.0303	0.0186
45.4	0.04201	0.04907	0.02679	0.02286	0.03055	0.04152	0.02708	0.01881		45.4	0.0372	0.0404	0.0318	0.0287	0.0253	0.0322	0.0301	0.0166		0.0257	0.0263	0.0282	0.022	0.0196	0.0272	0.0235	0.0218		0.0362	0.0392	0.0323	0.0276	0.0247	0.0319	0.0289	0.0179		45.4	0.0371	0.0406	0.0312	0.0284	0.0249	0.0323	0.0299	0.0182
45.6	0.04096	0.04657	0.02409	0.02346	0.0317	0.03157	0.02508	0.01861		45.6	0.037	0.0404	0.032	0.0285	0.0252	0.0321	0.0299	0.0171		0.0256	0.026	0.028	0.0222	0.0195	0.0272	0.0235	0.0217		0.0358	0.0392	0.0321	0.0275	0.0246	0.0319	0.0288	0.0191		45.6	0.0368	0.0403	0.0311	0.0283	0.0248	0.0323	0.0297	0.0178
45.8	0.04031	0.04622	0.02449	0.02336	0.0264	0.03337	0.02783	0.02041		45.8	0.0367	0.0405	0.0321	0.0283	0.0252	0.032	0.0298	0.017		0.0255	0.0258	0.0279	0.0221	0.0195	0.0272	0.0235	0.0215		0.0355	0.039	0.032	0.0274	0.0246	0.0317	0.0287	0.0196		45.8	0.0365	0.0403	0.0311	0.0281	0.0248	0.0322	0.0297	0.0177
46	0.04161	0.04652	0.02734	0.02401	0.0329	0.03302	0.02508	0.01961		46	0.0363	0.0403	0.0319	0.0281	0.0251	0.0319	0.0298	0.0146		0.0253	0.0256	0.0278	0.022	0.0195	0.0271	0.0234	0.0214		0.0353	0.0389	0.032	0.0272	0.0245	0.0316	0.0286	0.0192		46	0.0361	0.0402	0.0309	0.0279	0.0248	0.0321	0.0297	0.0177
46.2	0.03976	0.04447	0.02319	0.02661	0.02725	0.03247	0.02528	0.02046		46.2	0.0359	0.0402	0.0316	0.028	0.025	0.0319	0.0297	0.0162		0.025	0.0257	0.0278	0.0218	0.0193	0.0269	0.0233	0.0213		0.0349	0.0388	0.0317	0.027	0.0244	0.0314	0.0285	0.0193		46.2	0.0357	0.0399	0.0308	0.0278	0.0246	0.032	0.0297	0.0186
46.4	0.04046	0.04407	0.02594	0.02486	0.02425	0.03172	0.02133	0.01751		46.4	0.0354	0.04	0.0312	0.0279	0.0248	0.0318	0.0296	0.0183		0.0248	0.0259	0.0277	0.0216	0.0191	0.0267	0.0232	0.0213		0.0346	0.0388	0.0313	0.0268	0.0242	0.0312	0.0283	0.0202		46.4	0.0354	0.0401	0.0307	0.0276	0.0245	0.0319	0.0295	0.0191
46.6	0.04031	0.04572	0.02469	0.02251	0.02345	0.02942	0.02243	0.01851		46.6	0.0353	0.04	0.0311	0.0276	0.0247	0.0316	0.0294	0.0194		0.0246	0.026	0.0276	0.0214	0.019	0.0266	0.0229	0.0211		0.0344	0.0389	0.031	0.0266	0.024	0.0311	0.0282	0.0196		46.6	0.0351	0.04	0.0305	0.0273	0.0243	0.0316	0.0292	0.0197
46.8	0.03886	0.04892	0.02339	0.02041	0.02365	0.03222	0.02438	0.01886		46.8	0.0354	0.04	0.031	0.0274	0.0246	0.0313	0.0292	0.0189		0.0244	0.0263	0.0276	0.0211	0.0187	0.0264	0.0227	0.021		0.0344	0.0388	0.0309	0.0264	0.0238	0.0309	0.028	0.0189		46.8	0.0352	0.0398	0.0306	0.027	0.0242	0.0314	0.0289	0.0195
47	0.04021	0.05087	0.02499	0.02331	0.02395	0.03592	0.02588	0.01876		47	0.0354	0.0398	0.031	0.0272	0.0244	0.0311	0.0289	0.0168		0.0243	0.0262	0.0275	0.0209	0.0185	0.0262	0.0225	0.0208		0.0346	0.0385	0.0309	0.0262	0.0237	0.0307	0.0278	0.0189		47	0.0353	0.0397	0.0304	0.0267	0.024	0.0313	0.0288	0.018
47.2	0.03741	0.04967	0.02414	0.02286	0.0246	0.03402	0.02273	0.01721		47.2	0.0357	0.0395	0.0309	0.0271	0.0242	0.031	0.0287	0.0134		0.0242	0.026	0.0275	0.0208	0.0183	0.0261	0.0223	0.0206		0.0346	0.0383	0.0309	0.0261	0.0235	0.0306	0.0276	0.018		47.2	0.0354	0.0394	0.0301	0.0267	0.0238	0.0312	0.0287	0.017
47.4	0.03836	0.05062	0.02554	0.02086	0.0278	0.03767	0.02628	0.01881		47.4	0.0357	0.0391	0.0307	0.0272	0.024	0.0309	0.0287	0.0137		0.0243	0.0257	0.0274	0.0208	0.0182	0.0261	0.0221	0.0204		0.0346	0.0379	0.0307	0.0261	0.0233	0.0306	0.0275	0.0185		47.4	0.0356	0.039	0.03	0.0269	0.0236	0.0311	0.0287	0.0144
47.6	0.03766	0.04887	0.02409	0.02411	0.02765	0.03007	0.02233	0.02046		47.6	0.0356	0.0387	0.0304	0.0272	0.0239	0.0308	0.0288	0.0141		0.0242	0.0255	0.0272	0.0207	0.0182	0.0261	0.0221	0.0202		0.0346	0.0376	0.0305	0.026	0.0232	0.0305	0.0274	0.0195		47.6	0.0356	0.0388	0.0297	0.027	0.0235	0.031	0.0287	0.0166
47.8	0.03826	0.04922	0.02369	0.02421	0.0294	0.02872	0.02458	0.01966		47.8	0.0355	0.0383	0.0303	0.0271	0.0238	0.0307	0.0287	0.0146		0.0241	0.0253	0.027	0.0208	0.0183	0.0261	0.0221	0.0201		0.0344	0.0372	0.0304	0.026	0.0232	0.0304	0.0274	0.0191		47.8	0.0353	0.0384	0.0295	0.0269	0.0234	0.0308	0.0284	0.0179
48	0.03711	0.04702	0.02474	0.02286	0.02785	0.02937	0.02208	0.02026		48	0.0354	0.0384	0.0301	0.027	0.0238	0.0306	0.0285	0.0157		0.0241	0.025	0.0267	0.0208	0.0183	0.026	0.0221	0.0201		0.0342	0.0371	0.0303	0.0259	0.0231	0.0302	0.0273	0.0185		48	0.0353	0.0384	0.0296	0.0267	0.0233	0.0307	0.0281	0.0194
48.2	0.03721	0.04657	0.02329	0.02546	0.027	0.03257	0.02243	0.01916		48.2	0.0351	0.0384	0.0301	0.0268	0.0238	0.0305	0.0283	0.0176		0.0242	0.0248	0.0266	0.0208	0.0184	0.0259	0.0221	0.0201		0.034	0.0371	0.0302	0.0258	0.0231	0.0301	0.0272	0.0178		48.2	0.035	0.0383	0.0295	0.0265	0.0233	0.0306	0.028	0.0189
48.4	0.03751	0.04737	0.02439	0.02136	0.02365	0.03802	0.02418	0.01816		48.4	0.035	0.0383	0.0301	0.0267	0.0238	0.0304	0.0282	0.0174		0.0241	0.0247	0.0265	0.0206	0.0184	0.0258	0.0221	0.0201		0.0338	0.037	0.03	0.0257	0.023	0.0299	0.0271	0.018		48.4	0.0347	0.0383	0.0296	0.0264	0.0234	0.0305	0.028	0.0186
48.6	0.03706	0.04752	0.02354	0.02216	0.02495	0.03542	0.02368	0.01846		48.6	0.0347	0.0382	0.03	0.0266	0.0237	0.0303	0.0282	0.0154		0.0241	0.0247	0.0265	0.0206	0.0183	0.0256	0.022	0.0201		0.0336	0.037	0.03	0.0255	0.023	0.0298	0.027	0.0184		48.6	0.0346	0.0381	0.0295	0.0264	0.0233	0.0304	0.028	0.0185
48.8	0.03841	0.04902	0.02329	0.02116	0.02645	0.03912	0.02313	0.01886		48.8	0.0346	0.038	0.0299	0.0265	0.0236	0.03	0.0281	0.0132		0.0239	0.0246	0.0265	0.0205	0.0182	0.0255	0.0218	0.0201		0.0335	0.0368	0.0299	0.0254	0.0229	0.0296	0.0269	0.0175		48.8	0.0346	0.038	0.0293	0.0263	0.0233	0.0302	0.028	0.0168
49	0.03731	0.04612	0.02369	0.02061	0.02715	0.03087	0.02403	0.01941		49	0.0347	0.0379	0.0298	0.0264	0.0236	0.0299	0.0279	0.015		0.0239	0.0245	0.0266	0.0204	0.018	0.0253	0.0217	0.02		0.0335	0.0367	0.0298	0.0253	0.0228	0.0296	0.0267	0.0172		49	0.0345	0.0379	0.0292	0.0262	0.0233	0.0301	0.0279	0.0143
49.2	0.03846	0.04617	0.02259	0.02056	0.0237	0.02712	0.02313	0.01986		49.2	0.0347	0.0377	0.0297	0.0263	0.0235	0.0298	0.0277	0.0179		0.0237	0.0245	0.0265	0.0203	0.0179	0.0253	0.0216	0.0199		0.0337	0.0365	0.0296	0.0252	0.0226	0.0295	0.0266	0.0167		49.2	0.0346	0.0377	0.029	0.0259	0.0231	0.03	0.0277	0.0156
49.4	0.03706	0.04487	0.02399	0.02216	0.02135	0.02922	0.02418	0.01976		49.4	0.0346	0.0375	0.0297	0.0262	0.0234	0.0297	0.0276	0.0183		0.0237	0.0247	0.0265	0.0202	0.0178	0.0253	0.0215	0.0197		0.0337	0.0363	0.0295	0.0252	0.0226	0.0294	0.0265	0.0175		49.4	0.0345	0.0376	0.0292	0.0259	0.023	0.03	0.0276	0.017
49.6	0.03711	0.04442	0.02314	0.02036	0.0226	0.02827	0.02128	0.01631		49.6	0.0345	0.0374	0.0297	0.0262	0.0233	0.0297	0.0276	0.0179		0.0236	0.0247	0.0264	0.0202	0.0178	0.0253	0.0214	0.0197		0.0334	0.0362	0.0294	0.0251	0.0225	0.0293	0.0264	0.0187		49.6	0.0344	0.0375	0.0292	0.0259	0.0229	0.03	0.0275	0.0176
49.8	0.03671	0.04532	0.02229	0.02226	0.02245	0.03147	0.02123	0.01711		49.8	0.0343	0.0372	0.0297	0.0262	0.0232	0.0297	0.0276	0.0164		0.0238	0.0246	0.0263	0.0202	0.0177	0.0253	0.0214	0.0196		0.0333	0.0362	0.0294	0.0251	0.0225	0.0293	0.0263	0.0185		49.8	0.0342	0.0373	0.0293	0.026	0.0229	0.03	0.0275	0.0177
50	0.03686	0.04547	0.02319	0.02141	0.02015	0.02962	0.02373	0.01796		50	0.034	0.0372	0.0296	0.0262	0.0231	0.0296	0.0276	0.0161		0.0238	0.0247	0.0262	0.0201	0.0178	0.0252	0.0215	0.0195		0.0332	0.0359	0.0294	0.0251	0.0225	0.0292	0.0263	0.0185		50	0.0341	0.0372	0.0292	0.0259	0.0228	0.0298	0.0274	0.0165
50.2	0.03636	0.04502	0.02194	0.02051	0.0208	0.03052	0.02278	0.01791		50.2	0.0338	0.0373	0.0294	0.026	0.0231	0.0294	0.0274	0.0162		0.0239	0.0246	0.0261	0.0202	0.0178	0.0251	0.0215	0.0195		0.033	0.0361	0.0293	0.0249	0.0224	0.0291	0.0262	0.0176		50.2	0.0338	0.0372	0.0289	0.0258	0.0227	0.0296	0.0273	0.0161
50.4	0.03666	0.04512	0.02359	0.02121	0.02165	0.03057	0.02173	0.01796		50.4	0.0337	0.0374	0.0293	0.0258	0.023	0.0292	0.0272	0.0162		0.0238	0.0246	0.0261	0.0202	0.0177	0.0251	0.0215	0.0196		0.0327	0.0361	0.0292	0.0248	0.0223	0.029	0.0261	0.0169		50.4	0.0336	0.0374	0.0288	0.0255	0.0227	0.0294	0.0271	0.0172
50.6	0.03656	0.04597	0.02259	0.02006	0.021	0.02977	0.02353	0.01736		50.6	0.0336	0.0377	0.0292	0.0256	0.0229	0.0291	0.027	0.0157		0.0238	0.0247	0.0262	0.0202	0.0177	0.025	0.0214	0.0196		0.0326	0.0364	0.029	0.0247	0.0222	0.0289	0.026	0.0171		50.6	0.0334	0.0378	0.0287	0.0254	0.0226	0.0294	0.0269	0.0177
50.8	0.03591	0.04742	0.02209	0.02186	0.0216	0.03182	0.02178	0.01991		50.8	0.0335	0.0381	0.0291	0.0255	0.0228	0.0291	0.0269	0.0157		0.0238	0.0248	0.0263	0.02	0.0177	0.025	0.0213	0.0196		0.0326	0.0366	0.029	0.0246	0.0221	0.0288	0.0258	0.0174		50.8	0.0335	0.0382	0.0286	0.0254	0.0225	0.0293	0.0269	0.0186
51	0.03661	0.04502	0.02324	0.02086	0.02245	0.03152	0.01913	0.01971		51	0.0336	0.0381	0.0291	0.0255	0.0227	0.029	0.0269	0.0157		0.0239	0.0248	0.0264	0.02	0.0176	0.025	0.0212	0.0194		0.0327	0.0368	0.0289	0.0245	0.022	0.0287	0.0257	0.0183		51	0.0337	0.0381	0.0287	0.0253	0.0225	0.0293	0.0269	0.0181
51.2	0.03691	0.04547	0.02159	0.01971	0.02135	0.02647	0.02303	0.02031		51.2	0.0339	0.038	0.0291	0.0255	0.0226	0.029	0.0269	0.0157		0.024	0.0249	0.0266	0.02	0.0175	0.0249	0.0211	0.0194		0.0328	0.0367	0.029	0.0245	0.0219	0.0287	0.0257	0.0187		51.2	0.034	0.0382	0.0288	0.0253	0.0223	0.0292	0.0269	0.0179
51.4	0.03546	0.04557	0.02244	0.02181	0.02205	0.02972	0.02193	0.02046		51.4	0.0341	0.0379	0.0292	0.0255	0.0225	0.0289	0.0268	0.0157		0.0238	0.0251	0.0265	0.02	0.0175	0.0249	0.0211	0.0193		0.0329	0.0367	0.029	0.0244	0.0218	0.0287	0.0257	0.018		51.4	0.0339	0.0381	0.0287	0.0253	0.0222	0.0292	0.0268	0.018
51.6	0.03576	0.04642	0.02404	0.02146	0.02235	0.02922	0.02388	0.01896		51.6	0.0341	0.0379	0.0291	0.0254	0.0224	0.0289	0.0267	0.0157		0.0238	0.025	0.0264	0.02	0.0175	0.025	0.021	0.0192		0.033	0.0364	0.0289	0.0245	0.0218	0.0287	0.0257	0.0183		51.6	0.0341	0.0379	0.0287	0.0252	0.0222	0.0293	0.0267	0.0178
51.8	0.03586	0.04797	0.02289	0.02006	0.02185	0.02937	0.02093	0.01836		51.8	0.0341	0.0377	0.0291	0.0254	0.0224	0.029	0.0266	0.0158		0.0238	0.025	0.0265	0.02	0.0175	0.0251	0.0211	0.0191		0.0331	0.0363	0.0288	0.0245	0.0218	0.0287	0.0256	0.0178		51.8	0.0342	0.0379	0.0288	0.0254	0.0222	0.0294	0.0266	0.0168
52	0.03501	0.04752	0.02319	0.02046	0.0208	0.02997	0.02158	0.01981		52	0.0341	0.0376	0.029	0.0254	0.0224	0.0291	0.0266	0.0159		0.0238	0.0251	0.0264	0.02	0.0176	0.0251	0.0211	0.0191		0.0329	0.0363	0.0287	0.0245	0.0218	0.0287	0.0256	0.018		52	0.034	0.0377	0.0287	0.0254	0.0223	0.0294	0.0267	0.0162
52.2	0.03546	0.04912	0.02194	0.02091	0.02045	0.03017	0.02178	0.01926		52.2	0.034	0.0377	0.029	0.0255	0.0225	0.029	0.0268	0.0159		0.0238	0.025	0.0262	0.02	0.0176	0.0251	0.0211	0.0191		0.0329	0.0364	0.0287	0.0244	0.0218	0.0287	0.0256	0.0174		52.2	0.034	0.0377	0.0287	0.0254	0.0223	0.0295	0.0267	0.0158
52.4	0.03521	0.04737	0.02169	0.01841	0.0239	0.02692	0.02103	0.01861		52.4	0.0339	0.0378	0.0289	0.0255	0.0225	0.0289	0.0268	0.0159		0.0238	0.0253	0.0263	0.0201	0.0176	0.0251	0.0211	0.0191		0.0329	0.0365	0.0287	0.0244	0.0218	0.0286	0.0256	0.0166		52.4	0.034	0.0381	0.0286	0.0252	0.0222	0.0294	0.0267	0.0158
52.6	0.03626	0.04582	0.02124	0.02091	0.02195	0.02807	0.02208	0.01851		52.6	0.034	0.0383	0.0288	0.0254	0.0225	0.0289	0.0267	0.0159		0.0239	0.0253	0.0263	0.02	0.0176	0.0251	0.0212	0.0192		0.033	0.0368	0.0287	0.0243	0.0218	0.0285	0.0256	0.0163		52.6	0.0339	0.0384	0.0283	0.0252	0.0223	0.0292	0.0267	0.0164
52.8	0.03581	0.04652	0.02089	0.01956	0.0249	0.02677	0.01973	0.01776		52.8	0.034	0.0386	0.0287	0.0253	0.0225	0.0287	0.0266	0.016		0.0241	0.0255	0.0265	0.02	0.0176	0.0251	0.0212	0.0192		0.033	0.037	0.0287	0.0243	0.0217	0.0285	0.0256	0.0167		52.8	0.034	0.0387	0.0285	0.0252	0.0223	0.0292	0.0266	0.0177
53	0.03491	0.04637	0.02209	0.02011	0.02285	0.02792	0.02118	0.01771		53	0.0342	0.0387	0.0288	0.0253	0.0224	0.0287	0.0265	0.0161		0.0242	0.0256	0.0267	0.02	0.0175	0.0251	0.0211	0.0192		0.0331	0.0374	0.0287	0.0243	0.0217	0.0285	0.0255	0.0182		53	0.0342	0.0389	0.0285	0.0251	0.0222	0.0291	0.0266	0.018
53.2	0.03616	0.04622	0.02224	0.02271	0.02095	0.02667	0.02258	0.01946		53.2	0.0344	0.039	0.0289	0.0253	0.0224	0.0288	0.0264	0.0162		0.0243	0.0257	0.0268	0.0201	0.0175	0.0251	0.0211	0.0192		0.0333	0.0378	0.0287	0.0243	0.0217	0.0285	0.0254	0.0177		53.2	0.0345	0.0393	0.0285	0.0252	0.0223	0.0291	0.0266	0.0179
53.4	0.03596	0.04532	0.02189	0.01976	0.0215	0.03032	0.02058	0.01801		53.4	0.0347	0.0392	0.0289	0.0253	0.0225	0.0288	0.0265	0.0163		0.0245	0.026	0.027	0.0202	0.0176	0.0253	0.0211	0.0192		0.0336	0.0379	0.0288	0.0243	0.0217	0.0286	0.0253	0.0173		53.4	0.0348	0.0394	0.0287	0.0252	0.0223	0.0292	0.0265	0.0176
53.6	0.03526	0.04432	0.02264	0.02166	0.0201	0.02722	0.02048	0.01836		53.6	0.035	0.0396	0.029	0.0254	0.0225	0.0289	0.0265	0.0164		0.0246	0.0261	0.027	0.0203	0.0177	0.0253	0.0212	0.0192		0.0339	0.0383	0.029	0.0244	0.0217	0.0287	0.0253	0.0169		53.6	0.035	0.0397	0.0287	0.0253	0.0222	0.0293	0.0265	0.0173
53.8	0.03596	0.04552	0.02119	0.01961	0.02185	0.02632	0.01963	0.01791		53.8	0.0352	0.0398	0.0291	0.0255	0.0225	0.029	0.0266	0.0166		0.0249	0.0262	0.0272	0.0205	0.0179	0.0255	0.0213	0.0192		0.0341	0.0384	0.029	0.0245	0.0217	0.0288	0.0254	0.0167		53.8	0.0351	0.0396	0.0287	0.0254	0.0223	0.0295	0.0266	0.0172
54	0.03601	0.05037	0.02269	0.02031	0.02175	0.03027	0.02013	0.01831		54	0.0354	0.0397	0.0291	0.0256	0.0226	0.029	0.0266	0.0168		0.0252	0.0262	0.0273	0.0206	0.018	0.0256	0.0214	0.0193		0.0343	0.0384	0.0291	0.0246	0.0218	0.0289	0.0255	0.0173		54	0.0354	0.0398	0.0289	0.0255	0.0224	0.0296	0.0266	0.0161
54.2	0.03571	0.05132	0.02109	0.01976	0.02105	0.02817	0.02393	0.01761		54.2	0.0356	0.0398	0.0292	0.0257	0.0226	0.0292	0.0266	0.0169		0.0255	0.0263	0.0274	0.0208	0.0182	0.0258	0.0216	0.0194		0.0344	0.0383	0.0292	0.0246	0.0219	0.029	0.0256	0.0165		54.2	0.0354	0.0397	0.0289	0.0256	0.0224	0.0297	0.0268	0.016
54.4	0.03571	0.04842	0.02294	0.01841	0.02065	0.02882	0.02193	0.01706		54.4	0.0354	0.0394	0.0291	0.0258	0.0226	0.0293	0.0267	0.0169		0.0255	0.0263	0.0275	0.0209	0.0183	0.026	0.0217	0.0195		0.0343	0.0382	0.0291	0.0247	0.022	0.029	0.0257	0.0165		54.4	0.0353	0.0398	0.0289	0.0256	0.0225	0.0298	0.0269	0.0163
54.6	0.03586	0.04687	0.02224	0.02096	0.02415	0.02652	0.02043	0.01916		54.6	0.0353	0.0393	0.0291	0.0258	0.0228	0.0294	0.0267	0.0168		0.0254	0.026	0.0276	0.021	0.0184	0.0261	0.0218	0.0196		0.0342	0.0381	0.029	0.0247	0.0221	0.0291	0.0257	0.0177		54.6	0.0352	0.0394	0.0288	0.0257	0.0226	0.03	0.0268	0.0165
54.8	0.03601	0.04767	0.02249	0.01971	0.02225	0.02717	0.01953	0.01826		54.8	0.0351	0.0392	0.0289	0.0258	0.0229	0.0295	0.0268	0.0166		0.0254	0.026	0.0277	0.0211	0.0185	0.0262	0.0219	0.0197		0.0342	0.0377	0.029	0.0248	0.0222	0.0292	0.0257	0.0181		54.8	0.0352	0.0393	0.0287	0.0257	0.0227	0.0298	0.0269	0.0169
55	0.03636	0.04847	0.02299	0.02111	0.02325	0.02857	0.02188	0.01886		55	0.0348	0.0392	0.0289	0.0258	0.0229	0.0294	0.0268	0.0164		0.0252	0.0261	0.0276	0.0211	0.0186	0.0261	0.022	0.0198		0.034	0.0376	0.029	0.0247	0.0222	0.0292	0.0258	0.0182		55	0.0349	0.039	0.0286	0.0257	0.0229	0.0298	0.0269	0.0173
55.2	0.03616	0.04622	0.02219	0.01991	0.02325	0.02592	0.02133	0.01796		55.2	0.0349	0.0393	0.0288	0.0257	0.023	0.0293	0.0269	0.0165		0.025	0.0265	0.0276	0.0211	0.0187	0.0262	0.022	0.0198		0.0339	0.0379	0.0289	0.0247	0.0223	0.0291	0.0259	0.0172		55.2	0.0348	0.0394	0.0286	0.0257	0.0228	0.0299	0.027	0.0174
55.4	0.03626	0.04712	0.02194	0.01901	0.0199	0.02647	0.02123	0.01846		55.4	0.035	0.0398	0.0289	0.0257	0.023	0.0293	0.0269	0.0153		0.025	0.027	0.0275	0.021	0.0187	0.0262	0.0221	0.0199		0.0337	0.0383	0.0289	0.0247	0.0222	0.0291	0.0259	0.0168		55.4	0.0348	0.0398	0.0286	0.0256	0.0228	0.0299	0.027	0.0171
55.6	0.03731	0.04512	0.02279	0.02096	0.0204	0.02722	0.02013	0.01846		55.6	0.0351	0.0405	0.0289	0.0257	0.0229	0.0292	0.0269	0.0151		0.0253	0.0273	0.0277	0.021	0.0187	0.0261	0.0221	0.02		0.0341	0.0391	0.0291	0.0247	0.0222	0.029	0.0259	0.0169		55.6	0.0351	0.0407	0.0288	0.0255	0.0228	0.0297	0.0271	0.0176
55.8	0.03621	0.04492	0.02229	0.01806	0.02325	0.02602	0.02173	0.01631		55.8	0.0355	0.0415	0.0291	0.0256	0.0229	0.0291	0.0269	0.0154		0.0256	0.0279	0.0279	0.0209	0.0187	0.026	0.022	0.02		0.0345	0.0397	0.0294	0.0246	0.0221	0.0288	0.0258	0.0164		55.8	0.0354	0.0417	0.0289	0.0255	0.0228	0.0296	0.027	0.0177
56	0.03706	0.04412	0.02384	0.02036	0.0261	0.02717	0.02098	0.01781		56	0.0361	0.042	0.0293	0.0256	0.0228	0.0291	0.0268	0.0158		0.026	0.0279	0.0282	0.021	0.0186	0.026	0.022	0.02		0.0351	0.0402	0.0296	0.0246	0.0221	0.0288	0.0257	0.0169		56	0.036	0.0422	0.0292	0.0255	0.0226	0.0296	0.0269	0.0183
56.2	0.03696	0.04302	0.02194	0.01836	0.02205	0.02522	0.02338	0.01986		56.2	0.0368	0.0421	0.0297	0.0258	0.0228	0.0293	0.0267	0.0159		0.0265	0.0277	0.0287	0.0213	0.0186	0.0262	0.022	0.02		0.0355	0.0404	0.0297	0.0248	0.0221	0.0291	0.0257	0.0175		56.2	0.0368	0.0422	0.0293	0.0257	0.0226	0.0298	0.0269	0.0188
56.4	0.03666	0.04482	0.02439	0.02156	0.02175	0.02527	0.01988	0.01786		56.4	0.0372	0.0421	0.0297	0.026	0.0228	0.0296	0.0267	0.0157		0.0267	0.0276	0.0289	0.0216	0.0186	0.0265	0.0221	0.02		0.0357	0.0404	0.0297	0.025	0.0221	0.0293	0.0257	0.0186		56.4	0.0371	0.0422	0.0292	0.0261	0.0226	0.03	0.0269	0.0185
56.6	0.03706	0.04662	0.02424	0.01991	0.0202	0.02722	0.02188	0.01861		56.6	0.0371	0.0418	0.0295	0.0264	0.023	0.0299	0.0269	0.0156		0.0268	0.0279	0.0288	0.0218	0.0189	0.0269	0.0223	0.02		0.0359	0.0404	0.0298	0.0253	0.0223	0.0296	0.0259	0.0187		56.6	0.037	0.0424	0.0292	0.0263	0.0228	0.0306	0.027	0.0184
56.8	0.03696	0.04597	0.02264	0.02111	0.0217	0.03132	0.01753	0.01761		56.8	0.037	0.0416	0.0297	0.0266	0.0232	0.0303	0.0271	0.0155		0.0267	0.0277	0.0287	0.0222	0.0192	0.0273	0.0225	0.02		0.0357	0.0402	0.0299	0.0255	0.0226	0.0299	0.0261	0.0186		56.8	0.037	0.0419	0.0295	0.0266	0.0231	0.031	0.0273	0.0182
57	0.03736	0.04332	0.02399	0.02026	0.0211	0.02837	0.02188	0.01806		57	0.0367	0.0414	0.0297	0.0267	0.0235	0.0304	0.0274	0.0158		0.0268	0.0277	0.0288	0.0223	0.0195	0.0274	0.0228	0.0201		0.0357	0.0401	0.0301	0.0255	0.0228	0.03	0.0263	0.0186		57	0.0372	0.0419	0.0298	0.0266	0.0234	0.0311	0.0275	0.0182
57.2	0.03741	0.04482	0.02244	0.02196	0.0223	0.02582	0.02248	0.01636		57.2	0.0365	0.0413	0.0298	0.0266	0.0237	0.0304	0.0275	0.0168		0.0268	0.0279	0.0288	0.0222	0.0198	0.0274	0.0231	0.0203		0.0358	0.0397	0.0302	0.0254	0.0229	0.03	0.0264	0.0186		57.2	0.0369	0.0416	0.0296	0.0266	0.0236	0.0311	0.0276	0.0178
57.4	0.03681	0.04497	0.02499	0.01996	0.0249	0.02677	0.02093	0.01976		57.4	0.0364	0.041	0.0298	0.0264	0.0237	0.0303	0.0275	0.017		0.0266	0.0276	0.0289	0.0222	0.0198	0.0274	0.0231	0.0206		0.0354	0.0398	0.03	0.0253	0.0229	0.0299	0.0264	0.0184		57.4	0.0365	0.0414	0.0296	0.0265	0.0236	0.0311	0.0277	0.017
57.6	0.03711	0.04552	0.02289	0.02396	0.02585	0.02747	0.02413	0.01816		57.6	0.0361	0.041	0.0295	0.0262	0.0237	0.0302	0.0274	0.0163		0.0266	0.0275	0.0291	0.0222	0.0197	0.0274	0.0231	0.0209		0.035	0.0395	0.0297	0.0254	0.0229	0.03	0.0265	0.0184		57.6	0.0363	0.0413	0.0293	0.0264	0.0237	0.031	0.0278	0.0151
57.8	0.03781	0.04447	0.02209	0.02011	0.0266	0.02692	0.02208	0.01896		57.8	0.0357	0.0409	0.0292	0.0262	0.0237	0.0302	0.0274	0.0132		0.0264	0.0276	0.029	0.0222	0.0197	0.0273	0.0231	0.021		0.035	0.0395	0.0297	0.0252	0.0229	0.0299	0.0265	0.0184		57.8	0.0359	0.0411	0.0293	0.0264	0.0238	0.0308	0.0278	0.0166
58	0.03711	0.04682	0.02254	0.02051	0.0288	0.02742	0.02073	0.01806		58	0.0359	0.0407	0.0293	0.0263	0.0237	0.03	0.0275	0.0132		0.026	0.0277	0.0288	0.0221	0.0197	0.0273	0.023	0.0209		0.0351	0.0392	0.0297	0.0252	0.023	0.0299	0.0266	0.0184		58	0.0361	0.0408	0.0293	0.0263	0.0238	0.0308	0.0278	0.0175
58.2	0.03761	0.04937	0.02154	0.02006	0.02295	0.02647	0.02248	0.01916		58.2	0.0363	0.0406	0.0293	0.0263	0.0237	0.0299	0.0276	0.0144		0.026	0.0276	0.0288	0.022	0.0196	0.0274	0.023	0.0208		0.0355	0.0391	0.0298	0.0252	0.0229	0.0298	0.0265	0.0183		58.2	0.0365	0.0404	0.0293	0.0264	0.0237	0.0307	0.0279	0.0185
58.4	0.03686	0.05132	0.02349	0.02336	0.02485	0.02642	0.02178	0.01986		58.4	0.0365	0.0407	0.0295	0.0264	0.0236	0.0298	0.0276	0.0162		0.0264	0.0276	0.0287	0.0219	0.0197	0.0272	0.023	0.0208		0.0353	0.0389	0.0299	0.0254	0.0228	0.0298	0.0265	0.0181		58.4	0.0367	0.0407	0.029	0.0263	0.0234	0.0307	0.0278	0.0191
58.6	0.03676	0.04957	0.02349	0.02086	0.02355	0.02702	0.02353	0.01876		58.6	0.0364	0.0404	0.0294	0.0265	0.0233	0.0299	0.0275	0.0178		0.0269	0.0275	0.0285	0.022	0.0199	0.0271	0.023	0.0208		0.0353	0.0391	0.0299	0.0254	0.0227	0.0297	0.0266	0.0177		58.6	0.0363	0.0406	0.0289	0.0267	0.0233	0.0307	0.0278	0.0176
58.8	0.03721	0.04937	0.02144	0.02091	0.02495	0.02792	0.02153	0.01666		58.8	0.0363	0.0408	0.0295	0.0266	0.0233	0.0299	0.0275	0.0189		0.0271	0.0276	0.0285	0.0221	0.0198	0.0271	0.0231	0.0208		0.0352	0.039	0.0301	0.0255	0.0228	0.0297	0.0265	0.0174		58.8	0.0365	0.0406	0.0292	0.0267	0.0233	0.0307	0.0279	0.0172
59	0.03686	0.04882	0.02369	0.02296	0.0258	0.03112	0.02198	0.01726		59	0.0362	0.041	0.0294	0.0264	0.0233	0.0299	0.0274	0.0184		0.027	0.0277	0.0285	0.0223	0.0198	0.0272	0.0232	0.0211		0.035	0.0393	0.0303	0.0254	0.0228	0.0296	0.0265	0.017		59	0.0363	0.0411	0.0294	0.0265	0.0234	0.0305	0.0278	0.0171
59.2	0.03836	0.04712	0.02344	0.02206	0.0274	0.02967	0.02228	0.01661		59.2	0.0361	0.0416	0.0299	0.0265	0.0234	0.0299	0.0274	0.0168		0.0269	0.0279	0.0288	0.0224	0.0198	0.0272	0.0233	0.0211		0.0351	0.0399	0.0303	0.0255	0.0229	0.0297	0.0264	0.0169		59.2	0.0361	0.0417	0.0298	0.0265	0.0234	0.0305	0.0276	0.0172
59.4	0.03736	0.04587	0.02459	0.01946	0.02775	0.02847	0.02173	0.01706		59.4	0.0361	0.0423	0.0299	0.0263	0.0235	0.03	0.0273	0.016		0.0268	0.028	0.0292	0.0225	0.0198	0.0274	0.0234	0.0211		0.0351	0.0405	0.0303	0.0254	0.0229	0.0298	0.0264	0.0172		59.4	0.0363	0.0424	0.0299	0.0264	0.0234	0.0306	0.0274	0.0181
59.6	0.03796	0.04642	0.02274	0.02311	0.02575	0.02852	0.02268	0.02011		59.6	0.0362	0.0428	0.0298	0.0263	0.0236	0.0301	0.0273	0.0146		0.0269	0.0282	0.0295	0.0224	0.0198	0.0274	0.0233	0.0211		0.0353	0.0408	0.0303	0.0255	0.0229	0.0299	0.0265	0.0176		59.6	0.0364	0.0427	0.0295	0.0265	0.0235	0.0307	0.0275	0.0192
59.8	0.03706	0.04827	0.02204	0.02016	0.03275	0.02817	0.02248	0.01871		59.8	0.0365	0.0426	0.0298	0.0264	0.0235	0.0303	0.0274	0.0143		0.027	0.0285	0.0297	0.0224	0.0198	0.0275	0.0233	0.021		0.0356	0.0409	0.0303	0.0255	0.0229	0.0299	0.0266	0.0184		59.8	0.0366	0.0427	0.0295	0.0266	0.0235	0.0309	0.0277	0.0186
											0.0367	0.0424	0.0298	0.0266	0.0235	0.0304	0.0276	0.0146		0.0271	0.0291	0.0297	0.0224	0.0197	0.0276	0.0233	0.021		0.0357	0.0409	0.0303	0.0255	0.0229	0.03	0.0266	0.0187

## Sheet: RMSE_BR_0.1
t	S3	S4	S5	S6	S7	S8	S9	S10		HEC_M0.1_P3	HEC_M0.1_P4	HEC_M0.1_P5	HEC_M0.1_P6	HEC_M0.1_P7	HEC_M0.1_P8	HEC_M0.1_P9	HEC_M0.1_P10		Error_3	Error_4	Error_5	Error_6	Error_7	Error_8	Error_9	Error_10		Error^2_3	Error^2_4	Error^2_5	Error^2_6	Error^2_7	Error^2_8	Error^2_9	Error^2_10		RMSE_3	RMSE_4	RMSE_5	RMSE_6	RMSE_7	RMSE_8	RMSE_9	RMSE_10
0	0.00011	-8e-05	0.00039	6e-05	0	-3e-05	-7e-05	-4e-05		0	0	0	0	0	0	0	0		0.00011	-8e-05	0.00039	6e-05	0	-3e-05	-7e-05	-4e-05		1.21e-08	6.4e-09	1.521e-07	3.6e-09	0	9e-10	4.9e-09	1.6e-09		1.7623	2.31712	1.06162	0.583072	0.874792	0.769698	0.579304	0.794239
0.2	-0.00014	7e-05	-6e-05	0.00011	0	-3e-05	-7e-05	-9e-05		0	0	0	0	0	0	0	0		-0.00014	7e-05	-6e-05	0.00011	0	-3e-05	-7e-05	-9e-05		1.96e-08	4.9e-09	3.6e-09	1.21e-08	0	9e-10	4.9e-09	8.1e-09
0.4	-0.00014	-3e-05	-6e-05	6e-05	-0.00015	0.00012	-2e-05	-9e-05		0	0	0	0	0	0	0	0		-0.00014	-3e-05	-6e-05	6e-05	-0.00015	0.00012	-2e-05	-9e-05		1.96e-08	9e-10	3.6e-09	3.6e-09	2.25e-08	1.44e-08	4e-10	8.1e-09
0.6	6e-05	2e-05	-6e-05	6e-05	5e-05	-8e-05	3e-05	-9e-05		0	0	0	0	0	0	0	0		6e-05	2e-05	-6e-05	6e-05	5e-05	-8e-05	3e-05	-9e-05		3.6e-09	4e-10	3.6e-09	3.6e-09	2.5e-09	6.4e-09	9e-10	8.1e-09
0.8	1e-05	-0.00013	4e-05	6e-05	-5e-05	-3e-05	3e-05	-9e-05		0	0	0	0	0	0	0	0		1e-05	-0.00013	4e-05	6e-05	-5e-05	-3e-05	3e-05	-9e-05		1e-10	1.69e-08	1.6e-09	3.6e-09	2.5e-09	9e-10	9e-10	8.1e-09
1	-0.00014	0.00017	-6e-05	6e-05	-0.00015	0.00012	3e-05	-0.00014		0	0	0	0	0	0	0	0		-0.00014	0.00017	-6e-05	6e-05	-0.00015	0.00012	3e-05	-0.00014		1.96e-08	2.89e-08	3.6e-09	3.6e-09	2.25e-08	1.44e-08	9e-10	1.96e-08
1.2	1e-05	-3e-05	-0.00021	1e-05	0.0001	-3e-05	-2e-05	-0.00014		0	0	0	0	0	0	0	0		1e-05	-3e-05	-0.00021	1e-05	0.0001	-3e-05	-2e-05	-0.00014		1e-10	9e-10	4.41e-08	1e-10	1e-08	9e-10	4e-10	1.96e-08
1.4	1e-05	-3e-05	9e-05	6e-05	0	-3e-05	-2e-05	-0.00014		0	0	0	0	0	0	0	0		1e-05	-3e-05	9e-05	6e-05	0	-3e-05	-2e-05	-0.00014		1e-10	9e-10	8.1e-09	3.6e-09	0	9e-10	4e-10	1.96e-08
1.6	0.00026	-0.00013	4e-05	-4e-05	-5e-05	0.00012	-2e-05	-0.00014		0	0	0	0	0	0	0	0		0.00026	-0.00013	4e-05	-4e-05	-5e-05	0.00012	-2e-05	-0.00014		6.76e-08	1.69e-08	1.6e-09	1.6e-09	2.5e-09	1.44e-08	4e-10	1.96e-08
1.8	1e-05	0.00027	-1e-05	-4e-05	0.0002	-0.00013	3e-05	-0.00014		0	0	0	0	0	0	0	0		1e-05	0.00027	-1e-05	-4e-05	0.0002	-0.00013	3e-05	-0.00014		1e-10	7.29e-08	1e-10	1.6e-09	4e-08	1.69e-08	9e-10	1.96e-08
2	-9e-05	2e-05	-1e-05	1e-05	0	-3e-05	0.00013	-9e-05		0	0	0	0	0	0	0	0		-9e-05	2e-05	-1e-05	1e-05	0	-3e-05	0.00013	-9e-05		8.1e-09	4e-10	1e-10	1e-10	0	9e-10	1.69e-08	8.1e-09
2.2	0.00011	-0.00018	-1e-05	-4e-05	0	0.00012	0.00013	-9e-05		0	0	0	0	0	0	0	0		0.00011	-0.00018	-1e-05	-4e-05	0	0.00012	0.00013	-9e-05		1.21e-08	3.24e-08	1e-10	1.6e-09	0	1.44e-08	1.69e-08	8.1e-09
2.4	1e-05	-0.00013	-1e-05	1e-05	-0.00015	-0.00013	0.00013	1e-05		0	0	0	0	0	0	0	0		1e-05	-0.00013	-1e-05	1e-05	-0.00015	-0.00013	0.00013	1e-05		1e-10	1.69e-08	1e-10	1e-10	2.25e-08	1.69e-08	1.69e-08	1e-10
2.6	-9e-05	0.00032	-0.00016	-4e-05	5e-05	7e-05	0.00023	0.00011		0	0	0	0	0	0	0	0		-9e-05	0.00032	-0.00016	-4e-05	5e-05	7e-05	0.00023	0.00011		8.1e-09	1.024e-07	2.56e-08	1.6e-09	2.5e-09	4.9e-09	5.29e-08	1.21e-08
2.8	0.00011	7e-05	4e-05	-4e-05	0	0.00012	-7e-05	0.00031		0	0	0	0	0	0	0	0		0.00011	7e-05	4e-05	-4e-05	0	0.00012	-7e-05	0.00031		1.21e-08	4.9e-09	1.6e-09	1.6e-09	0	1.44e-08	4.9e-09	9.61e-08
3	1e-05	-8e-05	4e-05	-4e-05	-0.00015	-0.00013	-0.00012	0.00021		0	0	0	0	0	0	0	0		1e-05	-8e-05	4e-05	-4e-05	-0.00015	-0.00013	-0.00012	0.00021		1e-10	6.4e-09	1.6e-09	1.6e-09	2.25e-08	1.69e-08	1.44e-08	4.41e-08
3.2	-0.00014	-0.00013	-0.00016	-9e-05	0.0001	-0.00013	-0.00012	0.00011		0	0	0	0	0	0	0	0		-0.00014	-0.00013	-0.00016	-9e-05	0.0001	-0.00013	-0.00012	0.00011		1.96e-08	1.69e-08	2.56e-08	8.1e-09	1e-08	1.69e-08	1.44e-08	1.21e-08
3.4	6e-05	0.00017	0.00034	-4e-05	0	0.00012	-7e-05	0.00011		0	0	0	0	0	0	0	0		6e-05	0.00017	0.00034	-4e-05	0	0.00012	-7e-05	0.00011		3.6e-09	2.89e-08	1.156e-07	1.6e-09	0	1.44e-08	4.9e-09	1.21e-08
3.6	1e-05	-3e-05	-6e-05	-9e-05	0	-0.00018	-7e-05	0.00016		0	0	0	0	0	0	0	0		1e-05	-3e-05	-6e-05	-9e-05	0	-0.00018	-7e-05	0.00016		1e-10	9e-10	3.6e-09	8.1e-09	0	3.24e-08	4.9e-09	2.56e-08
3.8	-0.00014	2e-05	-1e-05	-4e-05	0.0002	7e-05	-2e-05	0.00011		0	0	0	0	0	0	0	0		-0.00014	2e-05	-1e-05	-4e-05	0.0002	7e-05	-2e-05	0.00011		1.96e-08	4e-10	1e-10	1.6e-09	4e-08	4.9e-09	4e-10	1.21e-08
4	1e-05	-8e-05	-0.00016	-9e-05	0	2e-05	-2e-05	6e-05		0	0	0	0	0	0	0	0		1e-05	-8e-05	-0.00016	-9e-05	0	2e-05	-2e-05	6e-05		1e-10	6.4e-09	2.56e-08	8.1e-09	0	4e-10	4e-10	3.6e-09
4.2	-4e-05	7e-05	-1e-05	-9e-05	-5e-05	-0.00018	-0.00017	6e-05		0	0	0	0	0	0	0	0		-4e-05	7e-05	-1e-05	-9e-05	-5e-05	-0.00018	-0.00017	6e-05		1.6e-09	4.9e-09	1e-10	8.1e-09	2.5e-09	3.24e-08	2.89e-08	3.6e-09
4.4	0.00011	7e-05	-0.00016	-9e-05	5e-05	-8e-05	3e-05	6e-05		0	0	0	0	0	0	0	0		0.00011	7e-05	-0.00016	-9e-05	5e-05	-8e-05	3e-05	6e-05		1.21e-08	4.9e-09	2.56e-08	8.1e-09	2.5e-09	6.4e-09	9e-10	3.6e-09
4.6	-4e-05	-3e-05	-0.00021	-4e-05	5e-05	2e-05	3e-05	1e-05		0	0	0	0	0	0	0	0		-4e-05	-3e-05	-0.00021	-4e-05	5e-05	2e-05	3e-05	1e-05		1.6e-09	9e-10	4.41e-08	1.6e-09	2.5e-09	4e-10	9e-10	1e-10
4.8	-9e-05	-8e-05	4e-05	-4e-05	-5e-05	-0.00023	-2e-05	6e-05		0	0	0	0	0	0	0	0		-9e-05	-8e-05	4e-05	-4e-05	-5e-05	-0.00023	-2e-05	6e-05		8.1e-09	6.4e-09	1.6e-09	1.6e-09	2.5e-09	5.29e-08	4e-10	3.6e-09
5	0.00016	-8e-05	-6e-05	1e-05	-0.0002	-3e-05	3e-05	1e-05		0	0	0	0	0	0	0	0		0.00016	-8e-05	-6e-05	1e-05	-0.0002	-3e-05	3e-05	1e-05		2.56e-08	6.4e-09	3.6e-09	1e-10	4e-08	9e-10	9e-10	1e-10
5.2	-4e-05	7e-05	-0.00011	1e-05	5e-05	-3e-05	8e-05	1e-05		0	0	0	0	0	0	0	0		-4e-05	7e-05	-0.00011	1e-05	5e-05	-3e-05	8e-05	1e-05		1.6e-09	4.9e-09	1.21e-08	1e-10	2.5e-09	9e-10	6.4e-09	1e-10
5.4	-0.00014	2e-05	9e-05	-9e-05	-0.0001	-0.00018	8e-05	1e-05		0	0	0	0	0	0	0	0		-0.00014	2e-05	9e-05	-9e-05	-0.0001	-0.00018	8e-05	1e-05		1.96e-08	4e-10	8.1e-09	8.1e-09	1e-08	3.24e-08	6.4e-09	1e-10
5.6	6e-05	-3e-05	-6e-05	-0.00019	-0.0001	-0.00013	0.00013	-9e-05		0	0	0	0	0	0	0	0		6e-05	-3e-05	-6e-05	-0.00019	-0.0001	-0.00013	0.00013	-9e-05		3.6e-09	9e-10	3.6e-09	3.61e-08	1e-08	1.69e-08	1.69e-08	8.1e-09
5.8	1e-05	-8e-05	-6e-05	1e-05	0.0001	-8e-05	0.00033	-4e-05		0	0	0	0	0	0	0	0		1e-05	-8e-05	-6e-05	1e-05	0.0001	-8e-05	0.00033	-4e-05		1e-10	6.4e-09	3.6e-09	1e-10	1e-08	6.4e-09	1.089e-07	1.6e-09
6	-0.00014	7e-05	-0.00021	-4e-05	-0.0001	-3e-05	3e-05	1e-05		0	0	0	0	0	0	0	0		-0.00014	7e-05	-0.00021	-4e-05	-0.0001	-3e-05	3e-05	1e-05		1.96e-08	4.9e-09	4.41e-08	1.6e-09	1e-08	9e-10	9e-10	1e-10
6.2	6e-05	-3e-05	-1e-05	-4e-05	0	-0.00013	-0.00017	-4e-05		0	0	0	0	0	0	0	0		6e-05	-3e-05	-1e-05	-4e-05	0	-0.00013	-0.00017	-4e-05		3.6e-09	9e-10	1e-10	1.6e-09	0	1.69e-08	2.89e-08	1.6e-09
6.4	1e-05	-3e-05	4e-05	-4e-05	0.0002	2e-05	-0.00012	-4e-05		0	0	0	0	0	0	0	0		1e-05	-3e-05	4e-05	-4e-05	0.0002	2e-05	-0.00012	-4e-05		1e-10	9e-10	1.6e-09	1.6e-09	4e-08	4e-10	1.44e-08	1.6e-09
6.6	-0.00014	-0.00013	-0.00016	-4e-05	0	0.00032	-7e-05	1e-05		0	0	0	0	0	0	0	0		-0.00014	-0.00013	-0.00016	-4e-05	0	0.00032	-7e-05	1e-05		1.96e-08	1.69e-08	2.56e-08	1.6e-09	0	1.024e-07	4.9e-09	1e-10
6.8	1e-05	2e-05	0.00014	-9e-05	0	-0.00013	-7e-05	-4e-05		0	0	0	0	0	0	0	0		1e-05	2e-05	0.00014	-9e-05	0	-0.00013	-7e-05	-4e-05		1e-10	4e-10	1.96e-08	8.1e-09	0	1.69e-08	4.9e-09	1.6e-09
7	-4e-05	2e-05	-6e-05	-9e-05	-0.00015	-0.00018	-2e-05	1e-05		0	0	0	0	0	0	0	0		-4e-05	2e-05	-6e-05	-9e-05	-0.00015	-0.00018	-2e-05	1e-05		1.6e-09	4e-10	3.6e-09	8.1e-09	2.25e-08	3.24e-08	4e-10	1e-10
7.2	6e-05	-0.00013	-6e-05	-4e-05	5e-05	-3e-05	-2e-05	-4e-05		0	0	0	0	0	0	0	0		6e-05	-0.00013	-6e-05	-4e-05	5e-05	-3e-05	-2e-05	-4e-05		3.6e-09	1.69e-08	3.6e-09	1.6e-09	2.5e-09	9e-10	4e-10	1.6e-09
7.4	1e-05	-0.00018	-0.00016	-9e-05	0	-0.00018	8e-05	-0.00014		0	0	0	0	0	0	0	0		1e-05	-0.00018	-0.00016	-9e-05	0	-0.00018	8e-05	-0.00014		1e-10	3.24e-08	2.56e-08	8.1e-09	0	3.24e-08	6.4e-09	1.96e-08
7.6	-9e-05	0.00012	-6e-05	-0.00014	-0.0002	-8e-05	3e-05	-4e-05		0	0	0	0	0	0	0	0		-9e-05	0.00012	-6e-05	-0.00014	-0.0002	-8e-05	3e-05	-4e-05		8.1e-09	1.44e-08	3.6e-09	1.96e-08	4e-08	6.4e-09	9e-10	1.6e-09
7.8	0.00011	2e-05	-0.00026	-4e-05	5e-05	2e-05	3e-05	1e-05		0	0	0	0	0	0	0	0		0.00011	2e-05	-0.00026	-4e-05	5e-05	2e-05	3e-05	1e-05		1.21e-08	4e-10	6.76e-08	1.6e-09	2.5e-09	4e-10	9e-10	1e-10
8	-4e-05	-3e-05	-0.00021	-0.00014	-5e-05	-0.00018	-2e-05	-4e-05		0	0	0	0	0	0	0	0		-4e-05	-3e-05	-0.00021	-0.00014	-5e-05	-0.00018	-2e-05	-4e-05		1.6e-09	9e-10	4.41e-08	1.96e-08	2.5e-09	3.24e-08	4e-10	1.6e-09
8.2	-0.00014	-0.00018	4e-05	-0.00014	-0.0001	-3e-05	-2e-05	-9e-05		0	0	0	0	0	0	0	0		-0.00014	-0.00018	4e-05	-0.00014	-0.0001	-3e-05	-2e-05	-9e-05		1.96e-08	3.24e-08	1.6e-09	1.96e-08	1e-08	9e-10	4e-10	8.1e-09
8.4	6e-05	7e-05	-6e-05	-0.00014	0.0001	2e-05	8e-05	-9e-05		0	0	0	0	0	0	0	0		6e-05	7e-05	-6e-05	-0.00014	0.0001	2e-05	8e-05	-9e-05		3.6e-09	4.9e-09	3.6e-09	1.96e-08	1e-08	4e-10	6.4e-09	8.1e-09
8.6	1e-05	-3e-05	-0.00016	-9e-05	-5e-05	-0.00023	8e-05	-9e-05		0	0	0	0	0	0	0	0		1e-05	-3e-05	-0.00016	-9e-05	-5e-05	-0.00023	8e-05	-9e-05		1e-10	9e-10	2.56e-08	8.1e-09	2.5e-09	5.29e-08	6.4e-09	8.1e-09
8.8	-0.00014	-8e-05	0.00024	-0.00014	-5e-05	2e-05	8e-05	-0.00014		0	0	0	0	0	0	0	0		-0.00014	-8e-05	0.00024	-0.00014	-5e-05	2e-05	8e-05	-0.00014		1.96e-08	6.4e-09	5.76e-08	1.96e-08	2.5e-09	4e-10	6.4e-09	1.96e-08
9	6e-05	-0.00013	-6e-05	-0.00014	0	-3e-05	0.00013	-0.00014		0	0	0	0	0	0	0	0		6e-05	-0.00013	-6e-05	-0.00014	0	-3e-05	0.00013	-0.00014		3.6e-09	1.69e-08	3.6e-09	1.96e-08	0	9e-10	1.69e-08	1.96e-08
9.2	1e-05	0.00012	-6e-05	-0.00019	0	-0.00023	8e-05	-0.00014		0	0	0	0	0	0	0	0		1e-05	0.00012	-6e-05	-0.00019	0	-0.00023	8e-05	-0.00014		1e-10	1.44e-08	3.6e-09	3.61e-08	0	5.29e-08	6.4e-09	1.96e-08
9.4	-0.00014	-3e-05	-0.00021	-0.00019	0	-8e-05	-0.00012	-9e-05		0	0	0	0	0	0	0	0		-0.00014	-3e-05	-0.00021	-0.00019	0	-8e-05	-0.00012	-9e-05		1.96e-08	9e-10	4.41e-08	3.61e-08	0	6.4e-09	1.44e-08	8.1e-09
9.6	-4e-05	-8e-05	4e-05	-0.00019	-0.00015	-0.00013	-0.00012	-0.00014		0	0	0	0	0	0	0	0		-4e-05	-8e-05	4e-05	-0.00019	-0.00015	-0.00013	-0.00012	-0.00014		1.6e-09	6.4e-09	1.6e-09	3.61e-08	2.25e-08	1.69e-08	1.44e-08	1.96e-08
9.8	-4e-05	-0.00018	-1e-05	-0.00024	0	-0.00013	-0.00012	-0.00019		0	0	0	0	0	0	0	0		-4e-05	-0.00018	-1e-05	-0.00024	0	-0.00013	-0.00012	-0.00019		1.6e-09	3.24e-08	1e-10	5.76e-08	0	1.69e-08	1.44e-08	3.61e-08
10	1e-05	7e-05	-0.00021	-0.00019	-0.0002	-0.00013	-7e-05	-0.00014		0	0	0	0	0	0	0	0		1e-05	7e-05	-0.00021	-0.00019	-0.0002	-0.00013	-7e-05	-0.00014		1e-10	4.9e-09	4.41e-08	3.61e-08	4e-08	1.69e-08	4.9e-09	1.96e-08
10.2	-4e-05	-3e-05	9e-05	-0.00019	-0.0002	-8e-05	-7e-05	-0.00014		0	0	0	0	0	0	0	0		-4e-05	-3e-05	9e-05	-0.00019	-0.0002	-8e-05	-7e-05	-0.00014		1.6e-09	9e-10	8.1e-09	3.61e-08	4e-08	6.4e-09	4.9e-09	1.96e-08
10.4	-9e-05	-3e-05	-6e-05	-0.00024	5e-05	0.00027	-2e-05	-0.00019		0	0	0	0	0	0	0	0		-9e-05	-3e-05	-6e-05	-0.00024	5e-05	0.00027	-2e-05	-0.00019		8.1e-09	9e-10	3.6e-09	5.76e-08	2.5e-09	7.29e-08	4e-10	3.61e-08
10.6	0.00011	-0.00013	-0.00011	-0.00024	-0.0001	-0.00013	3e-05	-0.00014		0	0.0334	0	0	0	0	0	0		0.00011	-0.03353	-0.00011	-0.00024	-0.0001	-0.00013	3e-05	-0.00014		1.21e-08	0.00112426	1.21e-08	5.76e-08	1e-08	1.69e-08	9e-10	1.96e-08
10.8	-9e-05	0.00012	4e-05	-0.00024	-0.00015	-8e-05	-2e-05	-0.00019		0.0096	0.0315	0	0	0	0	0	0		-0.00969	-0.03138	4e-05	-0.00024	-0.00015	-8e-05	-2e-05	-0.00019		9.38961e-05	0.000984704	1.6e-09	5.76e-08	2.25e-08	6.4e-09	4e-10	3.61e-08
11	-9e-05	0.01222	-6e-05	-0.00024	0.00015	2e-05	-2e-05	-0.00014		0.0346	0.0312	0	0	0	0	0	0		-0.03469	-0.01898	-6e-05	-0.00024	0.00015	2e-05	-2e-05	-0.00014		0.0012034	0.00036024	3.6e-09	5.76e-08	2.25e-08	4e-10	4e-10	1.96e-08
11.2	0.00856	0.01177	-6e-05	-0.00034	0	-0.00013	-7e-05	-9e-05		0.035	0.0273	0.0395	0	0	0	0	0		-0.02644	-0.01553	-0.03956	-0.00034	0	-0.00013	-7e-05	-9e-05		0.000699074	0.000241181	0.00156499	1.156e-07	0	1.69e-08	4.9e-09	8.1e-09
11.4	0.01061	0.01367	0.00559	-0.00024	-5e-05	-8e-05	8e-05	1e-05		0.0336	0.0253	0.042	0	0	0	0	0		-0.02299	-0.01163	-0.03641	-0.00024	-5e-05	-8e-05	8e-05	1e-05		0.00052854	0.000135257	0.00132569	5.76e-08	2.5e-09	6.4e-09	6.4e-09	1e-10
11.6	0.01181	0.02292	0.01494	-0.00024	-0.0002	2e-05	3e-05	0.00011		0.0341	0.0228	0.0449	0.0279	0	0	0	0		-0.02229	0.00012	-0.02996	-0.02814	-0.0002	2e-05	3e-05	0.00011		0.000496844	1.44e-08	0.000897602	0.00079186	4e-08	4e-10	9e-10	1.21e-08
11.8	0.01331	0.03092	0.01844	-0.00029	5e-05	-0.00023	-2e-05	0.00026		0.0327	0.0256	0.0434	0.0256	0	0.0359	0	0		-0.01939	0.00532	-0.02496	-0.02589	5e-05	-0.03613	-2e-05	0.00026		0.000375972	2.83024e-05	0.000623002	0.000670292	2.5e-09	0.00130538	4e-10	6.76e-08
12	0.01706	0.03382	0.01754	0.00066	0	0.00627	8e-05	0.00016		0.0343	0.0225	0.0448	0.027	0.0264	0.0399	0	0		-0.01724	0.01132	-0.02726	-0.02634	-0.0264	-0.03363	8e-05	0.00016		0.000297218	0.000128142	0.000743108	0.000693796	0.00069696	0.00113098	6.4e-09	2.56e-08
12.2	0.01746	0.03642	0.01979	0.00136	-0.00015	0.01307	8e-05	0.00011		0.0354	0.0238	0.0463	0.0263	0.03	0.0379	0.0231	0		-0.01794	0.01262	-0.02651	-0.02494	-0.03015	-0.02483	-0.02302	0.00011		0.000321844	0.000159264	0.00070278	0.000622004	0.000909022	0.000616529	0.00052992	1.21e-08
12.4	0.02076	0.04367	0.02344	0.00266	0.0067	0.01547	0.00033	6e-05		0.0348	0.0244	0.0452	0.0286	0.0297	0.0408	0.0238	0		-0.01404	0.01927	-0.02176	-0.02594	-0.023	-0.02533	-0.02347	6e-05		0.000197122	0.000371333	0.000473498	0.000672884	0.000529	0.000641609	0.000550841	3.6e-09
12.6	0.02851	0.04817	0.02414	0.01246	0.0123	0.01622	0.00098	6e-05		0.0447	0.03	0.0446	0.0294	0.0333	0.0417	0.0278	0		-0.01619	0.01817	-0.02046	-0.01694	-0.021	-0.02548	-0.02682	6e-05		0.000262116	0.000330149	0.000418612	0.000286964	0.000441	0.00064923	0.000719312	3.6e-09
12.8	0.03826	0.06057	0.02669	0.01386	0.01965	0.01752	0.00308	1e-05		0.0505	0.0288	0.0454	0.0298	0.0343	0.0432	0.0286	0.025		-0.01224	0.03177	-0.01871	-0.01594	-0.01465	-0.02568	-0.02552	-0.02499		0.000149818	0.00100933	0.000350064	0.000254084	0.000214622	0.000659462	0.00065127	0.0006245
13	0.04916	0.07412	0.02794	0.02156	0.02145	0.01862	0.00578	1e-05		0.0553	0.0289	0.0495	0.0302	0.0343	0.0454	0.0287	0.0279		-0.00614	0.04522	-0.02156	-0.00864	-0.01285	-0.02678	-0.02292	-0.02789		3.76996e-05	0.00204485	0.000464834	7.46496e-05	0.000165122	0.000717168	0.000525326	0.000777852
13.2	0.06541	0.07367	0.02954	0.01996	0.0256	0.01972	0.01258	-0.00124		0.0511	0.0298	0.0491	0.0367	0.0459	0.0475	0.0294	0.0279		0.01431	0.04387	-0.01956	-0.01674	-0.0203	-0.02778	-0.01682	-0.02914		0.000204776	0.00192458	0.000382594	0.000280228	0.00041209	0.000771728	0.000282912	0.00084914
13.4	0.08311	0.08617	0.03114	0.02486	0.02465	0.02162	0.01458	0.01201		0.0509	0.0316	0.0487	0.0407	0.0455	0.051	0.041	0.0333		0.03221	0.05457	-0.01756	-0.01584	-0.02085	-0.02938	-0.02642	-0.02129		0.00103748	0.00297788	0.000308354	0.000250906	0.000434723	0.000863184	0.000698016	0.000453264
13.6	0.09356	0.10002	0.03409	0.02051	0.02425	0.02432	0.01683	0.01401		0.0519	0.0308	0.0515	0.0399	0.0429	0.0538	0.042	0.0347		0.04166	0.06922	-0.01741	-0.01939	-0.01865	-0.02948	-0.02517	-0.02069		0.00173556	0.00479141	0.000303108	0.000375972	0.000347822	0.00086907	0.000633529	0.000428076
13.8	0.09211	0.11207	0.03734	0.02026	0.0322	0.03217	0.01813	0.01666		0.053	0.0326	0.0517	0.0405	0.042	0.0534	0.0403	0.0347		0.03911	0.07947	-0.01436	-0.02024	-0.0098	-0.02123	-0.02217	-0.01804		0.00152959	0.00631548	0.00020621	0.000409658	9.604e-05	0.000450713	0.000491509	0.000325442
14	0.08721	0.10767	0.03649	0.02336	0.02875	0.03472	0.01658	0.01921		0.0525	0.0311	0.0515	0.0439	0.0412	0.0555	0.0416	0.0331		0.03471	0.07657	-0.01501	-0.02054	-0.01245	-0.02078	-0.02502	-0.01389		0.00120478	0.00586296	0.0002253	0.000421892	0.000155002	0.000431808	0.000626	0.000192932
14.2	0.08866	0.08122	0.03739	0.02111	0.032	0.03662	0.02648	0.01711		0.0546	0.0311	0.0524	0.0434	0.0427	0.0542	0.0448	0.0344		0.03406	0.05012	-0.01501	-0.02229	-0.0107	-0.01758	-0.01832	-0.01729		0.00116008	0.00251201	0.0002253	0.000496844	0.00011449	0.000309056	0.000335622	0.000298944
14.4	0.06751	0.05867	0.03899	0.02611	0.0382	0.03537	0.03343	0.01686		0.0556	0.0306	0.0529	0.046	0.0416	0.0561	0.0431	0.0365		0.01191	0.02807	-0.01391	-0.01989	-0.0034	-0.02073	-0.00967	-0.01964		0.000141848	0.000787925	0.000193488	0.000395612	1.156e-05	0.000429733	9.35089e-05	0.00038573
14.6	0.07586	0.06127	0.03879	0.02996	0.04085	0.03697	0.02658	0.01986		0.0571	0.0349	0.0525	0.0456	0.0447	0.0569	0.0444	0.0389		0.01876	0.02637	-0.01371	-0.01564	-0.00385	-0.01993	-0.01782	-0.01904		0.000351938	0.000695377	0.000187964	0.00024461	1.48225e-05	0.000397205	0.000317552	0.000362522
14.8	0.07081	0.06082	0.03624	0.02856	0.0364	0.04277	0.02558	0.02331		0.0554	0.0359	0.0528	0.0467	0.0456	0.0562	0.0451	0.0395		0.01541	0.02492	-0.01656	-0.01814	-0.0092	-0.01343	-0.01952	-0.01619		0.000237468	0.000621006	0.000274234	0.00032906	8.464e-05	0.000180365	0.00038103	0.000262116
15	0.05986	0.06542	0.03179	0.03486	0.04535	0.05187	0.03303	0.02011		0.0553	0.0384	0.0544	0.0467	0.0446	0.0565	0.0466	0.0404		0.00456	0.02702	-0.02261	-0.01184	0.00075	-0.00463	-0.01357	-0.02029		2.07936e-05	0.00073008	0.000511212	0.000140186	5.625e-07	2.14369e-05	0.000184145	0.000411684
15.2	0.05676	0.06552	0.03439	0.02776	0.04495	0.04847	0.03698	0.01876		0.0543	0.046	0.0554	0.0472	0.0442	0.0583	0.0465	0.0407		0.00246	0.01952	-0.02101	-0.01944	0.00075	-0.00983	-0.00952	-0.02194		6.0516e-06	0.00038103	0.00044142	0.000377914	5.625e-07	9.66289e-05	9.06304e-05	0.000481364
15.4	0.05421	0.06997	0.03574	0.03796	0.0441	0.04777	0.03878	0.02191		0.0561	0.0538	0.0569	0.046	0.0456	0.0567	0.0472	0.0408		-0.00189	0.01617	-0.02116	-0.00804	-0.0015	-0.00893	-0.00842	-0.01889		3.5721e-06	0.000261469	0.000447746	6.46416e-05	2.25e-06	7.97449e-05	7.08964e-05	0.000356832
15.6	0.05036	0.06872	0.03814	0.04091	0.0384	0.04587	0.03318	0.02261		0.0571	0.0591	0.0576	0.0473	0.0449	0.0562	0.0468	0.0418		-0.00674	0.00962	-0.01946	-0.00639	-0.0065	-0.01033	-0.01362	-0.01919		4.54276e-05	9.25444e-05	0.000378692	4.08321e-05	4.225e-05	0.000106709	0.000185504	0.000368256
15.8	0.06066	0.07227	0.04424	0.03876	0.04365	0.04272	0.03988	0.02541		0.0565	0.0601	0.0583	0.0488	0.0455	0.057	0.0479	0.0426		0.00416	0.01217	-0.01406	-0.01004	-0.00185	-0.01428	-0.00802	-0.01719		1.73056e-05	0.000148109	0.000197684	0.000100802	3.4225e-06	0.000203918	6.43204e-05	0.000295496
16	0.06731	0.07332	0.03969	0.04041	0.0455	0.04337	0.03938	0.02546		0.0559	0.0617	0.0591	0.0492	0.0471	0.0575	0.0491	0.0426		0.01141	0.01162	-0.01941	-0.00879	-0.0016	-0.01413	-0.00972	-0.01714		0.000130188	0.000135024	0.000376748	7.72641e-05	2.56e-06	0.000199657	9.44784e-05	0.00029378
16.2	0.06436	0.06372	0.04259	0.03921	0.0442	0.04602	0.04133	0.03281		0.055	0.0598	0.0586	0.0497	0.0465	0.0579	0.0502	0.0438		0.00936	0.00392	-0.01601	-0.01049	-0.0023	-0.01188	-0.00887	-0.01099		8.76096e-05	1.53664e-05	0.00025632	0.00011004	5.29e-06	0.000141134	7.86769e-05	0.00012078
16.4	0.06821	0.07677	0.04159	0.04831	0.0434	0.04847	0.03748	0.03076		0.0555	0.0582	0.0594	0.0492	0.0462	0.0575	0.0504	0.0448		0.01271	0.01857	-0.01781	-0.00089	-0.0028	-0.00903	-0.01292	-0.01404		0.000161544	0.000344845	0.000317196	7.921e-07	7.84e-06	8.15409e-05	0.000166926	0.000197122
16.6	0.06966	0.08267	0.04069	0.04286	0.0529	0.05132	0.03973	0.02791		0.0541	0.0602	0.0578	0.0498	0.0465	0.0576	0.05	0.0449		0.01556	0.02247	-0.01711	-0.00694	0.0064	-0.00628	-0.01027	-0.01699		0.000242114	0.000504901	0.000292752	4.81636e-05	4.096e-05	3.94384e-05	0.000105473	0.00028866
16.8	0.07811	0.07867	0.04249	0.04676	0.05315	0.04997	0.03463	0.02311		0.0526	0.0596	0.0572	0.0492	0.0469	0.0562	0.0504	0.045		0.02551	0.01907	-0.01471	-0.00244	0.00625	-0.00623	-0.01577	-0.02189		0.00065076	0.000363665	0.000216384	5.9536e-06	3.90625e-05	3.88129e-05	0.000248693	0.000479172
17	0.08626	0.08157	0.03964	0.05101	0.0476	0.05247	0.04443	0.02456		0.0544	0.0593	0.0572	0.0477	0.0463	0.0546	0.0498	0.0445		0.03186	0.02227	-0.01756	0.00331	0.0013	-0.00213	-0.00537	-0.01994		0.00101506	0.000495953	0.000308354	1.09561e-05	1.69e-06	4.5369e-06	2.88369e-05	0.000397604
17.2	0.08441	0.08422	0.03949	0.04191	0.04965	0.04977	0.04223	0.02706		0.0537	0.0577	0.0564	0.0482	0.0455	0.0542	0.0484	0.0448		0.03071	0.02652	-0.01691	-0.00629	0.00415	-0.00443	-0.00617	-0.01774		0.000943104	0.00070331	0.000285948	3.95641e-05	1.72225e-05	1.96249e-05	3.80689e-05	0.000314708
17.4	0.08701	0.08477	0.03994	0.04271	0.0484	0.05367	0.04253	0.02731		0.0524	0.0572	0.0552	0.048	0.045	0.0542	0.0487	0.0444		0.03461	0.02757	-0.01526	-0.00529	0.0034	-0.00053	-0.00617	-0.01709		0.00119785	0.000760105	0.000232868	2.79841e-05	1.156e-05	2.809e-07	3.80689e-05	0.000292068
17.6	0.07881	0.08287	0.03749	0.03821	0.04505	0.05327	0.04738	0.03041		0.052	0.0566	0.0559	0.0475	0.0448	0.0541	0.049	0.0434		0.02681	0.02627	-0.01841	-0.00929	0.00025	-0.00083	-0.00162	-0.01299		0.000718776	0.000690113	0.000338928	8.63041e-05	6.25e-08	6.889e-07	2.6244e-06	0.00016874
17.8	0.07731	0.08347	0.03819	0.04576	0.0425	0.05247	0.04328	0.03136		0.0511	0.0562	0.0554	0.0468	0.0442	0.0536	0.0485	0.0431		0.02621	0.02727	-0.01721	-0.00104	-0.0017	-0.00113	-0.00522	-0.01174		0.000686964	0.000743653	0.000296184	1.0816e-06	2.89e-06	1.2769e-06	2.72484e-05	0.000137828
18	0.07666	0.08562	0.03779	0.04756	0.0511	0.05212	0.04523	0.02721		0.0507	0.0566	0.0551	0.0469	0.0435	0.0531	0.0479	0.0433		0.02596	0.02902	-0.01731	0.00066	0.0076	-0.00098	-0.00267	-0.01609		0.000673922	0.00084216	0.000299636	4.356e-07	5.776e-05	9.604e-07	7.1289e-06	0.000258888
18.2	0.07911	0.08342	0.03909	0.04761	0.051	0.05922	0.03873	0.02861		0.0511	0.0547	0.0548	0.0462	0.0434	0.0526	0.0477	0.0433		0.02801	0.02872	-0.01571	0.00141	0.0076	0.00662	-0.00897	-0.01469		0.00078456	0.000824838	0.000246804	1.9881e-06	5.776e-05	4.38244e-05	8.04609e-05	0.000215796
18.4	0.07806	0.07852	0.03529	0.04041	0.0569	0.05532	0.04853	0.02506		0.0499	0.0541	0.0542	0.0456	0.0424	0.0521	0.0469	0.043		0.02816	0.02442	-0.01891	-0.00519	0.0145	0.00322	0.00163	-0.01794		0.000792986	0.000596336	0.000357588	2.69361e-05	0.00021025	1.03684e-05	2.6569e-06	0.000321844
18.6	0.07841	0.07867	0.03644	0.05411	0.04695	0.05227	0.04578	0.02576		0.0486	0.0531	0.0535	0.0455	0.0416	0.0521	0.0465	0.0424		0.02981	0.02557	-0.01706	0.00861	0.00535	0.00017	-0.00072	-0.01664		0.000888636	0.000653825	0.000291044	7.41321e-05	2.86225e-05	2.89e-08	5.184e-07	0.00027689
18.8	0.08076	0.08132	0.03479	0.04241	0.05105	0.05247	0.04353	0.02801		0.049	0.0523	0.0527	0.0449	0.0422	0.0513	0.0459	0.0418		0.03176	0.02902	-0.01791	-0.00249	0.00885	0.00117	-0.00237	-0.01379		0.0010087	0.00084216	0.000320768	6.2001e-06	7.83225e-05	1.3689e-06	5.6169e-06	0.000190164
19	0.07706	0.08272	0.03654	0.04636	0.0543	0.06187	0.04563	0.02926		0.0491	0.0521	0.0518	0.0444	0.0421	0.0504	0.0455	0.0418		0.02796	0.03062	-0.01526	0.00196	0.0122	0.01147	0.00013	-0.01254		0.000781762	0.000937584	0.000232868	3.8416e-06	0.00014884	0.000131561	1.69e-08	0.000157252
19.2	0.07726	0.07862	0.03274	0.04636	0.0486	0.06807	0.05043	0.02821		0.0481	0.0512	0.0515	0.0442	0.0413	0.0502	0.0453	0.0417		0.02916	0.02742	-0.01876	0.00216	0.0073	0.01787	0.00513	-0.01349		0.000850306	0.000751856	0.000351938	4.6656e-06	5.329e-05	0.000319337	2.63169e-05	0.00018198
19.4	0.07906	0.07647	0.03329	0.03971	0.0493	0.05462	0.04203	0.02636		0.0476	0.0501	0.0517	0.0436	0.0407	0.0496	0.0448	0.0412		0.03146	0.02637	-0.01841	-0.00389	0.0086	0.00502	-0.00277	-0.01484		0.000989732	0.000695377	0.000338928	1.51321e-05	7.396e-05	2.52004e-05	7.6729e-06	0.000220226
19.6	0.07561	0.08287	0.03539	0.04016	0.054	0.04997	0.04878	0.02656		0.0476	0.0505	0.0509	0.0433	0.0404	0.0494	0.0442	0.0402		0.02801	0.03237	-0.01551	-0.00314	0.0136	0.00057	0.00458	-0.01364		0.00078456	0.00104782	0.00024056	9.8596e-06	0.00018496	3.249e-07	2.09764e-05	0.00018605
19.8	0.06921	0.08357	0.03439	0.05011	0.05205	0.05162	0.03913	0.02651		0.0472	0.0501	0.0499	0.0429	0.0399	0.0488	0.0439	0.0399		0.02201	0.03347	-0.01551	0.00721	0.01215	0.00282	-0.00477	-0.01339		0.00048444	0.00112024	0.00024056	5.19841e-05	0.000147623	7.9524e-06	2.27529e-05	0.000179292
20	0.07251	0.07517	0.03359	0.04581	0.0475	0.06012	0.04643	0.02841		0.0465	0.0496	0.05	0.0425	0.0398	0.0483	0.0435	0.0396		0.02601	0.02557	-0.01641	0.00331	0.0077	0.01182	0.00293	-0.01119		0.00067652	0.000653825	0.000269288	1.09561e-05	5.929e-05	0.000139712	8.5849e-06	0.000125216
20.2	0.07461	0.07322	0.03374	0.04361	0.04805	0.05912	0.04088	0.02961		0.0467	0.0495	0.0502	0.0421	0.0395	0.0478	0.0433	0.0394		0.02791	0.02372	-0.01646	0.00151	0.00855	0.01132	-0.00242	-0.00979		0.000778968	0.000562638	0.000270932	2.2801e-06	7.31025e-05	0.000128142	5.8564e-06	9.58441e-05
20.4	0.07411	0.07272	0.03259	0.04481	0.04695	0.05577	0.04968	0.02836		0.0464	0.0491	0.0495	0.0422	0.0388	0.0478	0.0431	0.0392		0.02771	0.02362	-0.01691	0.00261	0.00815	0.00797	0.00658	-0.01084		0.000767844	0.000557904	0.000285948	6.8121e-06	6.64225e-05	6.35209e-05	4.32964e-05	0.000117506
20.6	0.07051	0.06922	0.03459	0.04176	0.0447	0.05437	0.04268	0.02691		0.0456	0.0491	0.0492	0.0419	0.0385	0.0476	0.043	0.0389		0.02491	0.02012	-0.01461	-0.00014	0.0062	0.00677	-0.00032	-0.01199		0.000620508	0.000404814	0.000213452	1.96e-08	3.844e-05	4.58329e-05	1.024e-07	0.00014376
20.8	0.07006	0.07247	0.03779	0.04531	0.04605	0.05012	0.03968	0.02541		0.0455	0.0486	0.0489	0.041	0.0385	0.0469	0.0426	0.0384		0.02456	0.02387	-0.01111	0.00431	0.00755	0.00322	-0.00292	-0.01299		0.000603194	0.000569777	0.000123432	1.85761e-05	5.70025e-05	1.03684e-05	8.5264e-06	0.00016874
21	0.07141	0.06942	0.03589	0.04281	0.04915	0.04652	0.04328	0.02396		0.046	0.0488	0.0487	0.041	0.0382	0.0465	0.0419	0.0383		0.02541	0.02062	-0.01281	0.00181	0.01095	2e-05	0.00138	-0.01434		0.000645668	0.000425184	0.000164096	3.2761e-06	0.000119903	4e-10	1.9044e-06	0.000205636
21.2	0.06961	0.07017	0.03404	0.04411	0.0502	0.05617	0.03663	0.02631		0.046	0.0483	0.0484	0.0409	0.0379	0.0464	0.0418	0.038		0.02361	0.02187	-0.01436	0.00321	0.0123	0.00977	-0.00517	-0.01169		0.000557432	0.000478297	0.00020621	1.03041e-05	0.00015129	9.54529e-05	2.67289e-05	0.000136656
21.4	0.06981	0.07657	0.03364	0.03941	0.05025	0.05207	0.04488	0.02836		0.0456	0.0476	0.0491	0.0408	0.0377	0.0465	0.0415	0.0375		0.02421	0.02897	-0.01546	-0.00139	0.01255	0.00557	0.00338	-0.00914		0.000586124	0.000839261	0.000239012	1.9321e-06	0.000157503	3.10249e-05	1.14244e-05	8.35396e-05
21.6	0.07291	0.08447	0.03209	0.04501	0.04885	0.04987	0.04598	0.02801		0.0452	0.0477	0.0483	0.0406	0.0376	0.0461	0.0413	0.0373		0.02771	0.03677	-0.01621	0.00441	0.01125	0.00377	0.00468	-0.00929		0.000767844	0.00135203	0.000262764	1.94481e-05	0.000126562	1.42129e-05	2.19024e-05	8.63041e-05
21.8	0.06981	0.07972	0.03409	0.04036	0.0446	0.05502	0.04103	0.02611		0.0448	0.0474	0.0483	0.0407	0.0371	0.0464	0.0411	0.0371		0.02501	0.03232	-0.01421	-0.00034	0.0075	0.00862	-7e-05	-0.01099		0.0006255	0.00104458	0.000201924	1.156e-07	5.625e-05	7.43044e-05	4.9e-09	0.00012078
22	0.06906	0.07917	0.03089	0.04221	0.04585	0.05482	0.04388	0.02666		0.0451	0.0475	0.048	0.0397	0.0373	0.0459	0.041	0.0367		0.02396	0.03167	-0.01711	0.00251	0.00855	0.00892	0.00288	-0.01004		0.000574082	0.00100299	0.000292752	6.3001e-06	7.31025e-05	7.95664e-05	8.2944e-06	0.000100802
22.2	0.06761	0.07577	0.03069	0.03986	0.0501	0.05122	0.03768	0.02606		0.0442	0.0472	0.0472	0.0399	0.0371	0.0457	0.0404	0.0365		0.02341	0.02857	-0.01651	-4e-05	0.013	0.00552	-0.00272	-0.01044		0.000548028	0.000816245	0.00027258	1.6e-09	0.000169	3.04704e-05	7.3984e-06	0.000108994
22.4	0.07041	0.07037	0.03219	0.04101	0.0436	0.04952	0.04458	0.03166		0.0438	0.0464	0.0474	0.0399	0.0367	0.0452	0.0406	0.0368		0.02661	0.02397	-0.01521	0.00111	0.0069	0.00432	0.00398	-0.00514		0.000708092	0.000574561	0.000231344	1.2321e-06	4.761e-05	1.86624e-05	1.58404e-05	2.64196e-05
22.6	0.06881	0.07157	0.03089	0.04486	0.04545	0.05312	0.03978	0.02636		0.044	0.0461	0.0472	0.0392	0.0366	0.0449	0.0404	0.0365		0.02481	0.02547	-0.01631	0.00566	0.00885	0.00822	-0.00062	-0.01014		0.000615536	0.000648721	0.000266016	3.20356e-05	7.83225e-05	6.75684e-05	3.844e-07	0.00010282
22.8	0.06726	0.07132	0.02999	0.03686	0.0454	0.05347	0.04093	0.02656		0.044	0.0464	0.0465	0.0391	0.0362	0.045	0.0399	0.0362		0.02326	0.02492	-0.01651	-0.00224	0.0092	0.00847	0.00103	-0.00964		0.000541028	0.000621006	0.00027258	5.0176e-06	8.464e-05	7.17409e-05	1.0609e-06	9.29296e-05
23	0.06541	0.07512	0.03029	0.04761	0.0474	0.05477	0.03948	0.02391		0.0439	0.0463	0.0462	0.0389	0.0361	0.0445	0.0398	0.036		0.02151	0.02882	-0.01591	0.00871	0.0113	0.01027	-0.00032	-0.01209		0.00046268	0.000830592	0.000253128	7.58641e-05	0.00012769	0.000105473	1.024e-07	0.000146168
23.2	0.06816	0.07192	0.03129	0.03671	0.0513	0.04967	0.04133	0.02721		0.0434	0.0468	0.0465	0.0387	0.036	0.0441	0.0397	0.0357		0.02476	0.02512	-0.01521	-0.00199	0.0153	0.00557	0.00163	-0.00849		0.000613058	0.000631014	0.000231344	3.9601e-06	0.00023409	3.10249e-05	2.6569e-06	7.20801e-05
23.4	0.06706	0.07177	0.03264	0.04291	0.04185	0.05122	0.04348	0.02741		0.0434	0.0459	0.0465	0.0386	0.0357	0.044	0.0393	0.0357		0.02366	0.02587	-0.01386	0.00431	0.00615	0.00722	0.00418	-0.00829		0.000559796	0.000669257	0.0001921	1.85761e-05	3.78225e-05	5.21284e-05	1.74724e-05	6.87241e-05
23.6	0.06556	0.07472	0.03154	0.04106	0.04105	0.04547	0.03843	0.02836		0.0436	0.046	0.0466	0.0387	0.0356	0.0441	0.0394	0.0357		0.02196	0.02872	-0.01506	0.00236	0.00545	0.00137	-0.00097	-0.00734		0.000482242	0.000824838	0.000226804	5.5696e-06	2.97025e-05	1.8769e-06	9.409e-07	5.38756e-05
23.8	0.06931	0.07867	0.03239	0.03876	0.0415	0.04672	0.04058	0.02721		0.0433	0.0458	0.0462	0.0386	0.0354	0.0441	0.0392	0.0353		0.02601	0.03287	-0.01381	0.00016	0.0061	0.00262	0.00138	-0.00809		0.00067652	0.00108044	0.000190716	2.56e-08	3.721e-05	6.8644e-06	1.9044e-06	6.54481e-05
24	0.06516	0.07277	0.03154	0.04006	0.04555	0.04922	0.03828	0.02461		0.0427	0.0459	0.0458	0.0382	0.0353	0.044	0.0391	0.0351		0.02246	0.02687	-0.01426	0.00186	0.01025	0.00522	-0.00082	-0.01049		0.000504452	0.000721997	0.000203348	3.4596e-06	0.000105063	2.72484e-05	6.724e-07	0.00011004
24.2	0.06541	0.06802	0.03074	0.03906	0.0509	0.04892	0.04143	0.02436		0.0425	0.0455	0.0456	0.038	0.0352	0.0437	0.0391	0.035		0.02291	0.02252	-0.01486	0.00106	0.0157	0.00522	0.00233	-0.01064		0.000524868	0.00050715	0.00022082	1.1236e-06	0.00024649	2.72484e-05	5.4289e-06	0.00011321
24.4	0.06706	0.07067	0.03139	0.03961	0.04015	0.04947	0.04038	0.02646		0.0425	0.045	0.0455	0.0375	0.0348	0.0434	0.0385	0.0348		0.02456	0.02567	-0.01411	0.00211	0.00535	0.00607	0.00188	-0.00834		0.000603194	0.000658949	0.000199092	4.4521e-06	2.86225e-05	3.68449e-05	3.5344e-06	6.95556e-05
24.6	0.06921	0.06927	0.03174	0.04081	0.04155	0.04947	0.03693	0.02791		0.0426	0.0445	0.0453	0.0374	0.0346	0.0432	0.0383	0.0347		0.02661	0.02477	-0.01356	0.00341	0.00695	0.00627	-0.00137	-0.00679		0.000708092	0.000613553	0.000183874	1.16281e-05	4.83025e-05	3.93129e-05	1.8769e-06	4.61041e-05
24.8	0.06461	0.07117	0.03129	0.03836	0.03905	0.04907	0.04058	0.02486		0.0423	0.0447	0.0449	0.0373	0.0345	0.043	0.0381	0.0345		0.02231	0.02647	-0.01361	0.00106	0.00455	0.00607	0.00248	-0.00964		0.000497736	0.000700661	0.000185232	1.1236e-06	2.07025e-05	3.68449e-05	6.1504e-06	9.29296e-05
25	0.06586	0.06962	0.03109	0.03606	0.04335	0.04432	0.04208	0.02516		0.0417	0.0447	0.0448	0.0372	0.0343	0.0427	0.0381	0.0343		0.02416	0.02492	-0.01371	-0.00114	0.00905	0.00162	0.00398	-0.00914		0.000583706	0.000621006	0.000187964	1.2996e-06	8.19025e-05	2.6244e-06	1.58404e-05	8.35396e-05
25.2	0.06271	0.06442	0.03309	0.03996	0.04475	0.04727	0.03873	0.02496		0.0418	0.0441	0.0449	0.037	0.0341	0.0426	0.0379	0.0341		0.02091	0.02032	-0.01181	0.00296	0.01065	0.00467	0.00083	-0.00914		0.000437228	0.000412902	0.000139476	8.7616e-06	0.000113422	2.18089e-05	6.889e-07	8.35396e-05
25.4	0.06366	0.06572	0.03154	0.03616	0.0414	0.05037	0.03878	0.02496		0.0419	0.0438	0.0447	0.0367	0.034	0.0426	0.0375	0.0339		0.02176	0.02192	-0.01316	-0.00054	0.0074	0.00777	0.00128	-0.00894		0.000473498	0.000480486	0.000173186	2.916e-07	5.476e-05	6.03729e-05	1.6384e-06	7.99236e-05
25.6	0.06291	0.06462	0.03019	0.03946	0.04295	0.04717	0.04038	0.02716		0.0414	0.0439	0.0442	0.0367	0.0337	0.0424	0.0374	0.0338		0.02151	0.02072	-0.01401	0.00276	0.00925	0.00477	0.00298	-0.00664		0.00046268	0.000429318	0.00019628	7.6176e-06	8.55625e-05	2.27529e-05	8.8804e-06	4.40896e-05
25.8	0.06586	0.06857	0.03134	0.03446	0.0444	0.04312	0.03753	0.02371		0.0413	0.0439	0.044	0.0367	0.0336	0.0422	0.0374	0.0337		0.02456	0.02467	-0.01266	-0.00224	0.0108	0.00092	0.00013	-0.00999		0.000603194	0.000608609	0.000160276	5.0176e-06	0.00011664	8.464e-07	1.69e-08	9.98001e-05
26	0.06616	0.06957	0.03199	0.03601	0.0384	0.04022	0.03778	0.02631		0.0406	0.0433	0.0443	0.0363	0.0336	0.042	0.0374	0.0336		0.02556	0.02627	-0.01231	-0.00029	0.0048	-0.00178	0.00038	-0.00729		0.000653314	0.000690113	0.000151536	8.41e-08	2.304e-05	3.1684e-06	1.444e-07	5.31441e-05
26.2	0.06071	0.06967	0.03084	0.03621	0.03635	0.04492	0.03953	0.02496		0.0408	0.043	0.0439	0.0361	0.0333	0.0418	0.037	0.0334		0.01991	0.02667	-0.01306	0.00011	0.00305	0.00312	0.00253	-0.00844		0.000396408	0.000711289	0.000170564	1.21e-08	9.3025e-06	9.7344e-06	6.4009e-06	7.12336e-05
26.4	0.06276	0.07107	0.03059	0.03476	0.0376	0.04987	0.03623	0.02441		0.0408	0.0429	0.0438	0.0361	0.0332	0.0419	0.0368	0.0334		0.02196	0.02817	-0.01321	-0.00134	0.0044	0.00797	-0.00057	-0.00899		0.000482242	0.000793549	0.000174504	1.7956e-06	1.936e-05	6.35209e-05	3.249e-07	8.08201e-05
26.6	0.06461	0.06337	0.03094	0.03766	0.0405	0.04397	0.03733	0.02451		0.0407	0.0431	0.0432	0.0358	0.033	0.0415	0.0368	0.0332		0.02391	0.02027	-0.01226	0.00186	0.0075	0.00247	0.00053	-0.00869		0.000571688	0.000410873	0.000150308	3.4596e-06	5.625e-05	6.1009e-06	2.809e-07	7.55161e-05
26.8	0.06291	0.06372	0.02989	0.03656	0.047	0.04287	0.03568	0.02191		0.04	0.0429	0.0432	0.0358	0.0329	0.0414	0.0366	0.033		0.02291	0.02082	-0.01331	0.00076	0.0141	0.00147	-0.00092	-0.01109		0.000524868	0.000433472	0.000177156	5.776e-07	0.00019881	2.1609e-06	8.464e-07	0.000122988
27	0.05966	0.06822	0.03214	0.03841	0.0413	0.04377	0.03543	0.02221		0.0402	0.0427	0.0433	0.0354	0.0326	0.041	0.0365	0.0329		0.01946	0.02552	-0.01116	0.00301	0.0087	0.00277	-0.00107	-0.01069		0.000378692	0.00065127	0.000124546	9.0601e-06	7.569e-05	7.6729e-06	1.1449e-06	0.000114276
27.2	0.06446	0.06877	0.02984	0.03771	0.0394	0.04657	0.03998	0.02356		0.0406	0.0429	0.043	0.0352	0.0326	0.0409	0.0362	0.0327		0.02386	0.02587	-0.01316	0.00251	0.0068	0.00567	0.00378	-0.00914		0.0005693	0.000669257	0.000173186	6.3001e-06	4.624e-05	3.21489e-05	1.42884e-05	8.35396e-05
27.4	0.06561	0.06682	0.03174	0.03806	0.03765	0.04262	0.03428	0.02361		0.0402	0.0425	0.0429	0.0354	0.0324	0.0409	0.036	0.0326		0.02541	0.02432	-0.01116	0.00266	0.00525	0.00172	-0.00172	-0.00899		0.000645668	0.000591462	0.000124546	7.0756e-06	2.75625e-05	2.9584e-06	2.9584e-06	8.08201e-05
27.6	0.06211	0.07087	0.03374	0.03861	0.0442	0.04192	0.04008	0.02441		0.04	0.0422	0.043	0.0351	0.0322	0.0407	0.0361	0.0325		0.02211	0.02867	-0.00926	0.00351	0.012	0.00122	0.00398	-0.00809		0.000488852	0.000821969	8.57476e-05	1.23201e-05	0.000144	1.4884e-06	1.58404e-05	6.54481e-05
27.8	0.06216	0.06657	0.02934	0.03636	0.0425	0.04047	0.03368	0.02471		0.04	0.0416	0.0428	0.0351	0.0322	0.0407	0.036	0.0323		0.02216	0.02497	-0.01346	0.00126	0.0103	-0.00023	-0.00232	-0.00759		0.000491066	0.000623501	0.000181172	1.5876e-06	0.00010609	5.29e-08	5.3824e-06	5.76081e-05
28	0.06066	0.06622	0.03049	0.03886	0.04095	0.04487	0.03913	0.02276		0.0395	0.0415	0.0425	0.0351	0.032	0.0407	0.0358	0.0322		0.02116	0.02472	-0.01201	0.00376	0.00895	0.00417	0.00333	-0.00944		0.000447746	0.000611078	0.00014424	1.41376e-05	8.01025e-05	1.73889e-05	1.10889e-05	8.91136e-05
28.2	0.06221	0.06537	0.03129	0.03481	0.03705	0.04502	0.03293	0.02611		0.0391	0.0421	0.0419	0.0347	0.0321	0.0404	0.0357	0.0321		0.02311	0.02327	-0.01061	0.00011	0.00495	0.00462	-0.00277	-0.00599		0.000534072	0.000541493	0.000112572	1.21e-08	2.45025e-05	2.13444e-05	7.6729e-06	3.58801e-05
28.4	0.06071	0.06457	0.03234	0.03716	0.03525	0.04107	0.04073	0.02276		0.0391	0.0417	0.0418	0.0344	0.032	0.0402	0.0355	0.032		0.02161	0.02287	-0.00946	0.00276	0.00325	0.00087	0.00523	-0.00924		0.000466992	0.000523037	8.94916e-05	7.6176e-06	1.05625e-05	7.569e-07	2.73529e-05	8.53776e-05
28.6	0.06111	0.06277	0.03239	0.03946	0.0409	0.04297	0.03578	0.02521		0.0392	0.0412	0.042	0.0342	0.0317	0.0397	0.0353	0.032		0.02191	0.02157	-0.00961	0.00526	0.0092	0.00327	0.00048	-0.00679		0.000480048	0.000465265	9.23521e-05	2.76676e-05	8.464e-05	1.06929e-05	2.304e-07	4.61041e-05
28.8	0.06111	0.05982	0.02999	0.03326	0.0371	0.04502	0.03608	0.02321		0.0389	0.0412	0.0417	0.0342	0.0313	0.0396	0.0351	0.0319		0.02221	0.01862	-0.01171	-0.00094	0.0058	0.00542	0.00098	-0.00869		0.000493284	0.000346704	0.000137124	8.836e-07	3.364e-05	2.93764e-05	9.604e-07	7.55161e-05
29	0.06246	0.06117	0.02999	0.03876	0.03765	0.04407	0.03348	0.02311		0.0389	0.041	0.0417	0.0341	0.0311	0.0398	0.0349	0.0316		0.02356	0.02017	-0.01171	0.00466	0.00655	0.00427	-0.00142	-0.00849		0.000555074	0.000406829	0.000137124	2.17156e-05	4.29025e-05	1.82329e-05	2.0164e-06	7.20801e-05
29.2	0.05706	0.06727	0.03174	0.03406	0.0342	0.04207	0.03653	0.02496		0.039	0.0408	0.0416	0.0338	0.0313	0.0396	0.0349	0.0313		0.01806	0.02647	-0.00986	0.00026	0.0029	0.00247	0.00163	-0.00634		0.000326164	0.000700661	9.72196e-05	6.76e-08	8.41e-06	6.1009e-06	2.6569e-06	4.01956e-05
29.4	0.06121	0.06727	0.02949	0.03786	0.0358	0.04107	0.03613	0.02216		0.039	0.0412	0.0413	0.034	0.0311	0.0394	0.0347	0.0312		0.02221	0.02607	-0.01181	0.00386	0.0047	0.00167	0.00143	-0.00904		0.000493284	0.000679645	0.000139476	1.48996e-05	2.209e-05	2.7889e-06	2.0449e-06	8.17216e-05
29.6	0.05911	0.06512	0.03379	0.03436	0.0394	0.04022	0.03458	0.02436		0.0386	0.0406	0.0413	0.0339	0.031	0.0393	0.0347	0.0313		0.02051	0.02452	-0.00751	0.00046	0.0084	0.00092	-0.00012	-0.00694		0.00042066	0.00060123	5.64001e-05	2.116e-07	7.056e-05	8.464e-07	1.44e-08	4.81636e-05
29.8	0.06011	0.06682	0.03284	0.03486	0.0406	0.04437	0.03343	0.02131		0.039	0.0407	0.0416	0.0337	0.0311	0.0392	0.0347	0.0313		0.02111	0.02612	-0.00876	0.00116	0.0095	0.00517	-0.00127	-0.00999		0.000445632	0.000682254	7.67376e-05	1.3456e-06	9.025e-05	2.67289e-05	1.6129e-06	9.98001e-05
30	0.05966	0.07052	0.02889	0.03951	0.04505	0.04197	0.03393	0.02361		0.0384	0.0405	0.0412	0.0337	0.031	0.0391	0.0346	0.0312		0.02126	0.03002	-0.01231	0.00581	0.01405	0.00287	-0.00067	-0.00759		0.000451988	0.0009012	0.000151536	3.37561e-05	0.000197403	8.2369e-06	4.489e-07	5.76081e-05
30.2	0.06161	0.07612	0.02794	0.03181	0.04165	0.03877	0.03548	0.02586		0.0383	0.0404	0.0412	0.0337	0.0305	0.0393	0.0343	0.031		0.02331	0.03572	-0.01326	-0.00189	0.01115	-0.00053	0.00118	-0.00514		0.000543356	0.00127592	0.000175828	3.5721e-06	0.000124323	2.809e-07	1.3924e-06	2.64196e-05
30.4	0.06101	0.06772	0.03264	0.03846	0.03925	0.04107	0.03428	0.02436		0.0376	0.0404	0.041	0.0333	0.0305	0.039	0.0344	0.0309		0.02341	0.02732	-0.00836	0.00516	0.00875	0.00207	-0.00012	-0.00654		0.000548028	0.000746382	6.98896e-05	2.66256e-05	7.65625e-05	4.2849e-06	1.44e-08	4.27716e-05
30.6	0.05826	0.07232	0.03029	0.03391	0.041	0.04182	0.04083	0.02356		0.0376	0.0397	0.0407	0.033	0.0304	0.0388	0.034	0.0306		0.02066	0.03262	-0.01041	0.00091	0.0106	0.00302	0.00683	-0.00704		0.000426836	0.00106406	0.000108368	8.281e-07	0.00011236	9.1204e-06	4.66489e-05	4.95616e-05
30.8	0.06001	0.07132	0.03089	0.03396	0.03875	0.04072	0.02983	0.02346		0.0374	0.0398	0.0404	0.0328	0.0304	0.0386	0.034	0.0305		0.02261	0.03152	-0.00951	0.00116	0.00835	0.00212	-0.00417	-0.00704		0.000511212	0.00099351	9.04401e-05	1.3456e-06	6.97225e-05	4.4944e-06	1.73889e-05	4.95616e-05
31	0.05866	0.07052	0.02904	0.03381	0.03685	0.04342	0.03828	0.02376		0.0375	0.0394	0.0399	0.0327	0.0301	0.0383	0.0337	0.0305		0.02116	0.03112	-0.01086	0.00111	0.00675	0.00512	0.00458	-0.00674		0.000447746	0.000968454	0.00011794	1.2321e-06	4.55625e-05	2.62144e-05	2.09764e-05	4.54276e-05
31.2	0.05781	0.07362	0.02839	0.03061	0.0382	0.04752	0.02913	0.02351		0.0375	0.0392	0.0399	0.0327	0.03	0.0383	0.0337	0.0305		0.02031	0.03442	-0.01151	-0.00209	0.0082	0.00922	-0.00457	-0.00699		0.000412496	0.00118474	0.00013248	4.3681e-06	6.724e-05	8.50084e-05	2.08849e-05	4.88601e-05
31.4	0.05936	0.07617	0.02894	0.03806	0.0407	0.04087	0.03713	0.02391		0.0375	0.0393	0.0399	0.0323	0.0299	0.0379	0.0335	0.0302		0.02186	0.03687	-0.01096	0.00576	0.0108	0.00297	0.00363	-0.00629		0.00047786	0.0013594	0.000120122	3.31776e-05	0.00011664	8.8209e-06	1.31769e-05	3.95641e-05
31.6	0.05861	0.06992	0.02784	0.03126	0.04035	0.03712	0.03233	0.02171		0.0374	0.0385	0.0398	0.0324	0.0297	0.0378	0.0332	0.0302		0.02121	0.03142	-0.01196	-0.00114	0.01065	-0.00068	-0.00087	-0.00849		0.000449864	0.000987216	0.000143042	1.2996e-06	0.000113422	4.624e-07	7.569e-07	7.20801e-05
31.8	0.05646	0.07137	0.02949	0.03446	0.04045	0.03722	0.02918	0.02281		0.0374	0.0389	0.0399	0.0324	0.0295	0.0377	0.0332	0.03		0.01906	0.03247	-0.01041	0.00206	0.01095	-0.00048	-0.00402	-0.00719		0.000363284	0.0010543	0.000108368	4.2436e-06	0.000119903	2.304e-07	1.61604e-05	5.16961e-05
32	0.05936	0.07292	0.02984	0.03631	0.03635	0.04052	0.03813	0.02256		0.0369	0.0386	0.0397	0.0322	0.0295	0.0377	0.033	0.0298		0.02246	0.03432	-0.00986	0.00411	0.00685	0.00282	0.00513	-0.00724		0.000504452	0.00117786	9.72196e-05	1.68921e-05	4.69225e-05	7.9524e-06	2.63169e-05	5.24176e-05
32.2	0.05726	0.06657	0.02979	0.03276	0.03975	0.04292	0.03138	0.02606		0.0369	0.0389	0.0395	0.0323	0.0295	0.0378	0.0332	0.0297		0.02036	0.02767	-0.00971	0.00046	0.01025	0.00512	-0.00182	-0.00364		0.00041453	0.000765629	9.42841e-05	2.116e-07	0.000105063	2.62144e-05	3.3124e-06	1.32496e-05
32.4	0.05766	0.06392	0.02984	0.03556	0.0365	0.04242	0.03693	0.02411		0.0366	0.0383	0.0392	0.032	0.0294	0.0374	0.0331	0.0297		0.02106	0.02562	-0.00936	0.00356	0.0071	0.00502	0.00383	-0.00559		0.000443524	0.000656384	8.76096e-05	1.26736e-05	5.041e-05	2.52004e-05	1.46689e-05	3.12481e-05
32.6	0.05781	0.06422	0.03064	0.03301	0.039	0.03887	0.03263	0.02371		0.0364	0.0386	0.0393	0.0319	0.0292	0.0376	0.0329	0.0297		0.02141	0.02562	-0.00866	0.00111	0.0098	0.00127	-0.00027	-0.00599		0.000458388	0.000656384	7.49956e-05	1.2321e-06	9.604e-05	1.6129e-06	7.29e-08	3.58801e-05
32.8	0.05606	0.06102	0.03024	0.03281	0.0426	0.03952	0.03323	0.02281		0.0361	0.0383	0.0389	0.0316	0.029	0.0372	0.0329	0.0296		0.01996	0.02272	-0.00866	0.00121	0.0136	0.00232	0.00033	-0.00679		0.000398402	0.000516198	7.49956e-05	1.4641e-06	0.00018496	5.3824e-06	1.089e-07	4.61041e-05
33	0.05911	0.05952	0.03084	0.03396	0.0392	0.03977	0.03233	0.02136		0.0361	0.0386	0.039	0.0316	0.0287	0.0371	0.0325	0.0295		0.02301	0.02092	-0.00816	0.00236	0.0105	0.00267	-0.00017	-0.00814		0.00052946	0.000437646	6.65856e-05	5.5696e-06	0.00011025	7.1289e-06	2.89e-08	6.62596e-05
33.2	0.05706	0.05987	0.02869	0.03316	0.0393	0.04342	0.03408	0.02596		0.0362	0.0381	0.0389	0.0311	0.0286	0.0367	0.0324	0.0293		0.02086	0.02177	-0.01021	0.00206	0.0107	0.00672	0.00168	-0.00334		0.00043514	0.000473933	0.000104244	4.2436e-06	0.00011449	4.51584e-05	2.8224e-06	1.11556e-05
33.4	0.05566	0.05787	0.02819	0.03431	0.0389	0.03677	0.03443	0.02316		0.0363	0.0381	0.0389	0.0313	0.0286	0.0368	0.0322	0.0291		0.01936	0.01977	-0.01071	0.00301	0.0103	-3e-05	0.00223	-0.00594		0.00037481	0.000390853	0.000114704	9.0601e-06	0.00010609	9e-10	4.9729e-06	3.52836e-05
33.6	0.05606	0.05802	0.02864	0.02896	0.0377	0.04067	0.03203	0.02311		0.036	0.0379	0.0386	0.0312	0.0284	0.0366	0.0321	0.029		0.02006	0.02012	-0.00996	-0.00224	0.0093	0.00407	-7e-05	-0.00589		0.000402404	0.000404814	9.92016e-05	5.0176e-06	8.649e-05	1.65649e-05	4.9e-09	3.46921e-05
33.8	0.05616	0.05917	0.02969	0.03311	0.0391	0.03682	0.03008	0.02276		0.036	0.0377	0.0385	0.0312	0.0284	0.0367	0.032	0.0289		0.02016	0.02147	-0.00881	0.00191	0.0107	0.00012	-0.00192	-0.00614		0.000406426	0.000460961	7.76161e-05	3.6481e-06	0.00011449	1.44e-08	3.6864e-06	3.76996e-05
34	0.05671	0.06047	0.03054	0.03286	0.0429	0.03922	0.03838	0.02316		0.0358	0.0373	0.0384	0.031	0.0285	0.0365	0.0321	0.0288		0.02091	0.02317	-0.00786	0.00186	0.0144	0.00272	0.00628	-0.00564		0.000437228	0.000536849	6.17796e-05	3.4596e-06	0.00020736	7.3984e-06	3.94384e-05	3.18096e-05
34.2	0.05486	0.05972	0.02864	0.03146	0.0395	0.03892	0.02863	0.02171		0.0357	0.0375	0.0383	0.031	0.0283	0.0364	0.0319	0.0288		0.01916	0.02222	-0.00966	0.00046	0.0112	0.00252	-0.00327	-0.00709		0.000367106	0.000493728	9.33156e-05	2.116e-07	0.00012544	6.3504e-06	1.06929e-05	5.02681e-05
34.4	0.05591	0.05852	0.02769	0.03331	0.0366	0.03942	0.03468	0.02446		0.0352	0.037	0.038	0.0308	0.0281	0.0364	0.0318	0.0287		0.02071	0.02152	-0.01031	0.00251	0.0085	0.00302	0.00288	-0.00424		0.000428904	0.00046311	0.000106296	6.3001e-06	7.225e-05	9.1204e-06	8.2944e-06	1.79776e-05
34.6	0.05341	0.05747	0.02889	0.03051	0.03725	0.04417	0.03183	0.02241		0.0352	0.0372	0.0381	0.0306	0.028	0.0363	0.0316	0.0286		0.01821	0.02027	-0.00921	-9e-05	0.00925	0.00787	0.00023	-0.00619		0.000331604	0.000410873	8.48241e-05	8.1e-09	8.55625e-05	6.19369e-05	5.29e-08	3.83161e-05
34.8	0.05356	0.05652	0.02864	0.03361	0.0397	0.03727	0.03123	0.02036		0.0349	0.0371	0.0376	0.0303	0.0279	0.036	0.0315	0.0284		0.01866	0.01942	-0.00896	0.00331	0.0118	0.00127	-0.00027	-0.00804		0.000348196	0.000377136	8.02816e-05	1.09561e-05	0.00013924	1.6129e-06	7.29e-08	6.46416e-05
35	0.05476	0.05482	0.02704	0.02651	0.04025	0.03922	0.03588	0.02171		0.0348	0.0365	0.0377	0.0304	0.0277	0.0359	0.0312	0.0283		0.01996	0.01832	-0.01066	-0.00389	0.01255	0.00332	0.00468	-0.00659		0.000398402	0.000335622	0.000113636	1.51321e-05	0.000157503	1.10224e-05	2.19024e-05	4.34281e-05
35.2	0.05366	0.05547	0.02954	0.03546	0.0382	0.03662	0.02703	0.02286		0.035	0.0369	0.0376	0.0301	0.0275	0.0356	0.0313	0.0283		0.01866	0.01857	-0.00806	0.00536	0.0107	0.00102	-0.00427	-0.00544		0.000348196	0.000344845	6.49636e-05	2.87296e-05	0.00011449	1.0404e-06	1.82329e-05	2.95936e-05
35.4	0.05456	0.05482	0.03084	0.03031	0.04155	0.03972	0.03533	0.02326		0.0348	0.0362	0.0373	0.0301	0.0276	0.0357	0.0311	0.0281		0.01976	0.01862	-0.00646	0.00021	0.01395	0.00402	0.00423	-0.00484		0.000390458	0.000346704	4.17316e-05	4.41e-08	0.000194602	1.61604e-05	1.78929e-05	2.34256e-05
35.6	0.05421	0.05647	0.03009	0.03031	0.03455	0.03802	0.03248	0.02221		0.035	0.0359	0.0373	0.0301	0.0274	0.0354	0.031	0.028		0.01921	0.02057	-0.00721	0.00021	0.00715	0.00262	0.00148	-0.00579		0.000369024	0.000423125	5.19841e-05	4.41e-08	5.11225e-05	6.8644e-06	2.1904e-06	3.35241e-05
35.8	0.05401	0.05667	0.02969	0.03036	0.0313	0.04117	0.03283	0.01891		0.0345	0.0359	0.037	0.0299	0.0273	0.0352	0.031	0.028		0.01951	0.02077	-0.00731	0.00046	0.004	0.00597	0.00183	-0.00909		0.00038064	0.000431393	5.34361e-05	2.116e-07	1.6e-05	3.56409e-05	3.3489e-06	8.26281e-05
36	0.05351	0.05817	0.02669	0.02736	0.0355	0.04097	0.03093	0.02306		0.0343	0.0357	0.0368	0.03	0.0273	0.0354	0.0309	0.0279		0.01921	0.02247	-0.01011	-0.00264	0.0082	0.00557	3e-05	-0.00484		0.000369024	0.000504901	0.000102212	6.9696e-06	6.724e-05	3.10249e-05	9e-10	2.34256e-05
36.2	0.05301	0.05837	0.02724	0.03006	0.0365	0.03422	0.03173	0.02161		0.0341	0.0351	0.0367	0.0296	0.0271	0.0351	0.0308	0.0279		0.01891	0.02327	-0.00946	0.00046	0.0094	-0.00088	0.00093	-0.00629		0.000357588	0.000541493	8.94916e-05	2.116e-07	8.836e-05	7.744e-07	8.649e-07	3.95641e-05
36.4	0.05176	0.05667	0.02779	0.03121	0.03755	0.03602	0.03103	0.02226		0.0338	0.0351	0.0365	0.0295	0.0271	0.0348	0.0307	0.0277		0.01796	0.02157	-0.00871	0.00171	0.01045	0.00122	0.00033	-0.00544		0.000322562	0.000465265	7.58641e-05	2.9241e-06	0.000109203	1.4884e-06	1.089e-07	2.95936e-05
36.6	0.05281	0.05737	0.02914	0.03061	0.03965	0.03572	0.03368	0.02046		0.0334	0.0349	0.0361	0.0293	0.0267	0.0347	0.0305	0.0276		0.01941	0.02247	-0.00696	0.00131	0.01295	0.00102	0.00318	-0.00714		0.000376748	0.000504901	4.84416e-05	1.7161e-06	0.000167702	1.0404e-06	1.01124e-05	5.09796e-05
36.8	0.05096	0.05397	0.02829	0.02821	0.0418	0.03792	0.02778	0.02231		0.033	0.0344	0.036	0.0291	0.0265	0.0346	0.0303	0.0275		0.01796	0.01957	-0.00771	-0.00089	0.0153	0.00332	-0.00252	-0.00519		0.000322562	0.000382985	5.94441e-05	7.921e-07	0.00023409	1.10224e-05	6.3504e-06	2.69361e-05
37	0.05161	0.05692	0.03119	0.03001	0.04035	0.03852	0.03528	0.02341		0.0329	0.0344	0.0357	0.0287	0.0263	0.0342	0.03	0.0273		0.01871	0.02252	-0.00451	0.00131	0.01405	0.00432	0.00528	-0.00389		0.000350064	0.00050715	2.03401e-05	1.7161e-06	0.000197402	1.86624e-05	2.78784e-05	1.51321e-05
37.2	0.05136	0.05562	0.02674	0.02946	0.03655	0.03967	0.02833	0.02151		0.0325	0.0341	0.0353	0.0285	0.0261	0.0339	0.0298	0.0271		0.01886	0.02152	-0.00856	0.00096	0.01045	0.00577	-0.00147	-0.00559		0.0003557	0.00046311	7.32736e-05	9.216e-07	0.000109202	3.32929e-05	2.1609e-06	3.12481e-05
37.4	0.05211	0.05352	0.02724	0.02906	0.03165	0.04022	0.03183	0.02061		0.0324	0.0342	0.0352	0.0283	0.0258	0.0337	0.0296	0.0269		0.01971	0.01932	-0.00796	0.00076	0.00585	0.00652	0.00223	-0.00629		0.000388484	0.000373262	6.33616e-05	5.776e-07	3.42225e-05	4.25104e-05	4.9729e-06	3.95641e-05
37.6	0.04886	0.05427	0.02629	0.02926	0.0303	0.03622	0.02833	0.02031		0.0324	0.0336	0.0349	0.028	0.0256	0.0335	0.0294	0.0268		0.01646	0.02067	-0.00861	0.00126	0.0047	0.00272	-0.00107	-0.00649		0.000270932	0.000427249	7.41321e-05	1.5876e-06	2.209e-05	7.3984e-06	1.1449e-06	4.21201e-05
37.8	0.04936	0.05792	0.02549	0.02761	0.03255	0.04397	0.03038	0.02161		0.0324	0.0337	0.0349	0.028	0.0255	0.0334	0.0292	0.0266		0.01696	0.02422	-0.00941	-0.00039	0.00705	0.01057	0.00118	-0.00499		0.000287642	0.000586608	8.85481e-05	1.521e-07	4.97025e-05	0.000111725	1.3924e-06	2.49001e-05
38	0.05146	0.05577	0.02839	0.03071	0.0358	0.03782	0.03033	0.01976		0.032	0.0334	0.0346	0.0278	0.0252	0.0332	0.0291	0.0264		0.01946	0.02237	-0.00621	0.00291	0.0106	0.00462	0.00123	-0.00664		0.000378692	0.000500417	3.85641e-05	8.4681e-06	0.00011236	2.13444e-05	1.5129e-06	4.40896e-05
38.2	0.05051	0.05482	0.02594	0.02916	0.0417	0.03412	0.02743	0.02036		0.0319	0.0336	0.0347	0.0278	0.0251	0.0331	0.029	0.0263		0.01861	0.02122	-0.00876	0.00136	0.0166	0.00102	-0.00157	-0.00594		0.000346332	0.000450288	7.67376e-05	1.8496e-06	0.00027556	1.0404e-06	2.4649e-06	3.52836e-05
38.4	0.04991	0.05397	0.02804	0.03106	0.04155	0.03232	0.03133	0.02236		0.0317	0.0335	0.0345	0.0275	0.0249	0.0329	0.0288	0.0261		0.01821	0.02047	-0.00646	0.00356	0.01665	-0.00058	0.00253	-0.00374		0.000331604	0.000419021	4.17316e-05	1.26736e-05	0.000277222	3.364e-07	6.4009e-06	1.39876e-05
38.6	0.05086	0.05632	0.02604	0.02721	0.0383	0.03342	0.03173	0.02486		0.0314	0.0332	0.0345	0.0274	0.0249	0.0328	0.0287	0.026		0.01946	0.02312	-0.00846	-0.00019	0.0134	0.00062	0.00303	-0.00114		0.000378692	0.000534534	7.15716e-05	3.61e-08	0.00017956	3.844e-07	9.1809e-06	1.2996e-06
38.8	0.04966	0.05182	0.02634	0.03246	0.03655	0.03627	0.02848	0.02376		0.0315	0.0333	0.0345	0.0273	0.0245	0.0327	0.0284	0.0259		0.01816	0.01852	-0.00816	0.00516	0.01205	0.00357	8e-05	-0.00214		0.000329786	0.00034299	6.65856e-05	2.66256e-05	0.000145202	1.27449e-05	6.4e-09	4.5796e-06
39	0.04826	0.05702	0.02679	0.02681	0.0349	0.03582	0.02863	0.02281		0.0312	0.0329	0.0342	0.027	0.0245	0.0325	0.0284	0.0258		0.01706	0.02412	-0.00741	-0.00019	0.0104	0.00332	0.00023	-0.00299		0.000291044	0.000581774	5.49081e-05	3.61e-08	0.00010816	1.10224e-05	5.29e-08	8.9401e-06
39.2	0.05046	0.05842	0.02584	0.02666	0.03575	0.03737	0.03263	0.02151		0.031	0.0325	0.0341	0.027	0.0243	0.0326	0.0281	0.0256		0.01946	0.02592	-0.00826	-0.00034	0.01145	0.00477	0.00453	-0.00409		0.000378692	0.000671846	6.82276e-05	1.156e-07	0.000131102	2.27529e-05	2.05209e-05	1.67281e-05
39.4	0.05321	0.05922	0.02664	0.02796	0.0401	0.03537	0.02783	0.02031		0.031	0.0325	0.0337	0.0268	0.0242	0.0324	0.0282	0.0254		0.02221	0.02672	-0.00706	0.00116	0.0159	0.00297	-0.00037	-0.00509		0.000493284	0.000713958	4.98436e-05	1.3456e-06	0.00025281	8.8209e-06	1.369e-07	2.59081e-05
39.6	0.04871	0.06377	0.02514	0.02551	0.03565	0.03582	0.02938	0.02126		0.0304	0.0323	0.0334	0.0268	0.0242	0.0323	0.028	0.0253		0.01831	0.03147	-0.00826	-0.00129	0.01145	0.00352	0.00138	-0.00404		0.000335256	0.000990361	6.82276e-05	1.6641e-06	0.000131103	1.23904e-05	1.9044e-06	1.63216e-05
39.8	0.04911	0.05957	0.02679	0.03236	0.037	0.03377	0.02788	0.02091		0.0305	0.0322	0.0333	0.0265	0.024	0.032	0.0279	0.0252		0.01861	0.02737	-0.00651	0.00586	0.013	0.00177	-2e-05	-0.00429		0.000346332	0.000749117	4.23801e-05	3.43396e-05	0.000169	3.1329e-06	4e-10	1.84041e-05
40	0.05041	0.05472	0.02634	0.02646	0.0366	0.03282	0.02713	0.01926		0.0304	0.0318	0.0331	0.0262	0.024	0.0318	0.0277	0.0253		0.02001	0.02292	-0.00676	0.00026	0.0126	0.00102	-0.00057	-0.00604		0.0004004	0.000525326	4.56976e-05	6.76e-08	0.00015876	1.0404e-06	3.249e-07	3.64816e-05
40.2	0.04881	0.05652	0.02629	0.02731	0.0347	0.04232	0.02643	0.02076		0.0304	0.0322	0.0331	0.0262	0.0238	0.0316	0.0275	0.0251		0.01841	0.02432	-0.00681	0.00111	0.0109	0.01072	-0.00107	-0.00434		0.000338928	0.000591462	4.63761e-05	1.2321e-06	0.00011881	0.000114918	1.1449e-06	1.88356e-05
40.4	0.04841	0.05487	0.02774	0.02831	0.03295	0.03822	0.02903	0.02131		0.0301	0.0315	0.0329	0.0261	0.0235	0.0314	0.0273	0.025		0.01831	0.02337	-0.00516	0.00221	0.00945	0.00682	0.00173	-0.00369		0.000335256	0.000546157	2.66256e-05	4.8841e-06	8.93025e-05	4.65124e-05	2.9929e-06	1.36161e-05
40.6	0.04766	0.05667	0.02789	0.02756	0.0367	0.03607	0.02778	0.02241		0.0303	0.0317	0.0331	0.0261	0.0235	0.0314	0.0273	0.0248		0.01736	0.02497	-0.00521	0.00146	0.0132	0.00467	0.00048	-0.00239		0.00030137	0.000623501	2.71441e-05	2.1316e-06	0.00017424	2.18089e-05	2.304e-07	5.7121e-06
40.8	0.04721	0.06067	0.02794	0.03046	0.0309	0.03502	0.02973	0.02001		0.0302	0.0315	0.0328	0.0258	0.0233	0.0312	0.0271	0.0246		0.01701	0.02917	-0.00486	0.00466	0.0076	0.00382	0.00263	-0.00459		0.00028934	0.000850889	2.36196e-05	2.17156e-05	5.776e-05	1.45924e-05	6.9169e-06	2.10681e-05
41	0.04751	0.05772	0.02654	0.02591	0.03615	0.03672	0.02633	0.02281		0.0302	0.031	0.0328	0.0259	0.0234	0.0313	0.0271	0.0245		0.01731	0.02672	-0.00626	1e-05	0.01275	0.00542	-0.00077	-0.00169		0.000299636	0.000713958	3.91876e-05	1e-10	0.000162563	2.93764e-05	5.929e-07	2.8561e-06
41.2	0.04621	0.05632	0.02804	0.03086	0.0345	0.03347	0.02623	0.02276		0.0302	0.0308	0.0326	0.0258	0.0232	0.0311	0.0269	0.0244		0.01601	0.02552	-0.00456	0.00506	0.0113	0.00237	-0.00067	-0.00164		0.00025632	0.00065127	2.07936e-05	2.56036e-05	0.00012769	5.6169e-06	4.489e-07	2.6896e-06
41.4	0.04901	0.05722	0.02584	0.02681	0.03525	0.03517	0.03278	0.02186		0.0299	0.0305	0.0324	0.0258	0.0233	0.031	0.0271	0.0244		0.01911	0.02672	-0.00656	0.00101	0.01195	0.00417	0.00568	-0.00254		0.000365192	0.000713958	4.30336e-05	1.0201e-06	0.000142802	1.73889e-05	3.22624e-05	6.4516e-06
41.6	0.04616	0.05732	0.03019	0.02941	0.037	0.03737	0.02398	0.01911		0.0294	0.0302	0.032	0.0257	0.0231	0.031	0.0268	0.0243		0.01676	0.02712	-0.00181	0.00371	0.0139	0.00637	-0.00282	-0.00519		0.000280898	0.000735494	3.2761e-06	1.37641e-05	0.00019321	4.05769e-05	7.9524e-06	2.69361e-05
41.8	0.04751	0.05757	0.02759	0.02486	0.0409	0.03592	0.03008	0.02216		0.0292	0.0301	0.0319	0.0256	0.0231	0.0309	0.0269	0.0243		0.01831	0.02747	-0.00431	-0.00074	0.0178	0.00502	0.00318	-0.00214		0.000335256	0.000754601	1.85761e-05	5.476e-07	0.00031684	2.52004e-05	1.01124e-05	4.5796e-06
42	0.04651	0.05722	0.02664	0.02466	0.0368	0.03602	0.02663	0.02251		0.0288	0.0303	0.0316	0.0252	0.0229	0.0306	0.0267	0.0243		0.01771	0.02692	-0.00496	-0.00054	0.0139	0.00542	-7e-05	-0.00179		0.000313644	0.000724686	2.46016e-05	2.916e-07	0.00019321	2.93764e-05	4.9e-09	3.2041e-06
42.2	0.04701	0.05592	0.02599	0.02581	0.0363	0.03312	0.03088	0.02486		0.0286	0.03	0.0316	0.025	0.0227	0.0304	0.0265	0.0241		0.01841	0.02592	-0.00561	0.00081	0.0136	0.00272	0.00438	0.00076		0.000338928	0.000671846	3.14721e-05	6.561e-07	0.00018496	7.3984e-06	1.91844e-05	5.776e-07
42.4	0.04481	0.05592	0.02489	0.02851	0.03995	0.03222	0.02598	0.02061		0.0284	0.0301	0.0314	0.0247	0.0224	0.03	0.0262	0.024		0.01641	0.02582	-0.00651	0.00381	0.01755	0.00222	-0.00022	-0.00339		0.000269288	0.000666672	4.23801e-05	1.45161e-05	0.000308002	4.9284e-06	4.84e-08	1.14921e-05
42.6	0.04421	0.05387	0.02749	0.02531	0.0327	0.03582	0.02778	0.02011		0.0286	0.0302	0.0313	0.0246	0.0222	0.0299	0.026	0.0239		0.01561	0.02367	-0.00381	0.00071	0.0105	0.00592	0.00178	-0.00379		0.000243672	0.000560269	1.45161e-05	5.041e-07	0.00011025	3.50464e-05	3.1684e-06	1.43641e-05
42.8	0.04621	0.05542	0.02629	0.02531	0.03665	0.03572	0.02648	0.01981		0.0284	0.0297	0.0311	0.0244	0.0219	0.0296	0.0257	0.0236		0.01781	0.02572	-0.00481	0.00091	0.01475	0.00612	0.00078	-0.00379		0.000317196	0.000661518	2.31361e-05	8.281e-07	0.000217563	3.74544e-05	6.084e-07	1.43641e-05
43	0.04456	0.05572	0.02804	0.02791	0.0339	0.03392	0.02718	0.01891		0.0285	0.0292	0.0312	0.0244	0.0219	0.0297	0.0257	0.0234		0.01606	0.02652	-0.00316	0.00351	0.012	0.00422	0.00148	-0.00449		0.000257924	0.00070331	9.9856e-06	1.23201e-05	0.000144	1.78084e-05	2.1904e-06	2.01601e-05
43.2	0.04536	0.05662	0.02909	0.02731	0.034	0.03707	0.02763	0.02031		0.0284	0.0291	0.0309	0.0242	0.0217	0.0294	0.0255	0.0234		0.01696	0.02752	-0.00181	0.00311	0.0123	0.00767	0.00213	-0.00309		0.000287642	0.00075735	3.2761e-06	9.6721e-06	0.00015129	5.88289e-05	4.5369e-06	9.5481e-06
43.4	0.04536	0.05717	0.02584	0.02271	0.03775	0.03212	0.02333	0.01926		0.0284	0.0286	0.0307	0.0244	0.0218	0.0296	0.0255	0.0232		0.01696	0.02857	-0.00486	-0.00169	0.01595	0.00252	-0.00217	-0.00394		0.000287642	0.000816245	2.36196e-05	2.8561e-06	0.000254402	6.3504e-06	4.7089e-06	1.55236e-05
43.6	0.04526	0.05107	0.02519	0.02486	0.03545	0.03772	0.02873	0.02021		0.028	0.0281	0.0304	0.0243	0.0216	0.0295	0.0254	0.0231		0.01726	0.02297	-0.00521	0.00056	0.01385	0.00822	0.00333	-0.00289		0.000297908	0.000527621	2.71441e-05	3.136e-07	0.000191823	6.75684e-05	1.10889e-05	8.3521e-06
43.8	0.04491	0.05017	0.02444	0.02501	0.03235	0.03412	0.02478	0.02171		0.0273	0.0277	0.0301	0.0241	0.0217	0.0294	0.0255	0.0231		0.01761	0.02247	-0.00566	0.00091	0.01065	0.00472	-0.00072	-0.00139		0.000310112	0.000504901	3.20356e-05	8.281e-07	0.000113422	2.22784e-05	5.184e-07	1.9321e-06
44	0.04366	0.05042	0.02784	0.02721	0.03295	0.03297	0.02868	0.02026		0.0269	0.0272	0.0298	0.0239	0.0215	0.0292	0.0253	0.023		0.01676	0.02322	-0.00196	0.00331	0.01145	0.00377	0.00338	-0.00274		0.000280898	0.000539168	3.8416e-06	1.09561e-05	0.000131103	1.42129e-05	1.14244e-05	7.5076e-06
44.2	0.04346	0.05117	0.02584	0.02486	0.02755	0.03732	0.02468	0.01836		0.0264	0.0273	0.0295	0.0236	0.0213	0.0289	0.0251	0.023		0.01706	0.02387	-0.00366	0.00126	0.00625	0.00842	-0.00042	-0.00464		0.000291044	0.000569777	1.33956e-05	1.5876e-06	3.90625e-05	7.08964e-05	1.764e-07	2.15296e-05
44.4	0.04191	0.04917	0.02734	0.02271	0.03405	0.03962	0.02978	0.02006		0.0259	0.0272	0.0291	0.0232	0.021	0.0285	0.0248	0.0229		0.01601	0.02197	-0.00176	-0.00049	0.01305	0.01112	0.00498	-0.00284		0.00025632	0.000482681	3.0976e-06	2.401e-07	0.000170302	0.000123654	2.48004e-05	8.0656e-06
44.6	0.04236	0.05162	0.02814	0.02316	0.0322	0.03412	0.02638	0.01831		0.0255	0.0273	0.0288	0.0228	0.0207	0.0281	0.0246	0.0227		0.01686	0.02432	-0.00066	0.00036	0.0115	0.00602	0.00178	-0.00439		0.00028426	0.000591462	4.356e-07	1.296e-07	0.00013225	3.62404e-05	3.1684e-06	1.92721e-05
44.8	0.04181	0.05282	0.02499	0.02526	0.02795	0.03042	0.02383	0.02191		0.0255	0.027	0.0287	0.0225	0.0204	0.0278	0.0242	0.0225		0.01631	0.02582	-0.00371	0.00276	0.00755	0.00262	-0.00037	-0.00059		0.000266016	0.000666672	1.37641e-05	7.6176e-06	5.70025e-05	6.8644e-06	1.369e-07	3.481e-07
45	0.04161	0.05257	0.02919	0.02811	0.02945	0.02867	0.02663	0.02076		0.0254	0.0268	0.0285	0.0222	0.0201	0.0275	0.0239	0.0223		0.01621	0.02577	0.00069	0.00591	0.00935	0.00117	0.00273	-0.00154		0.000262764	0.000664093	4.761e-07	3.49281e-05	8.74225e-05	1.3689e-06	7.4529e-06	2.3716e-06
45.2	0.04136	0.05282	0.02564	0.02381	0.0282	0.03562	0.02343	0.01986		0.0257	0.0266	0.0284	0.0221	0.0199	0.0273	0.0237	0.022		0.01566	0.02622	-0.00276	0.00171	0.0083	0.00832	-0.00027	-0.00214		0.000245236	0.000687488	7.6176e-06	2.9241e-06	6.889e-05	6.92224e-05	7.29e-08	4.5796e-06
45.4	0.04201	0.04907	0.02679	0.02286	0.03055	0.04152	0.02708	0.01881		0.0257	0.0263	0.0282	0.022	0.0196	0.0272	0.0235	0.0218		0.01631	0.02277	-0.00141	0.00086	0.01095	0.01432	0.00358	-0.00299		0.000266016	0.000518473	1.9881e-06	7.396e-07	0.000119903	0.000205062	1.28164e-05	8.9401e-06
45.6	0.04096	0.04657	0.02409	0.02346	0.0317	0.03157	0.02508	0.01861		0.0256	0.026	0.028	0.0222	0.0195	0.0272	0.0235	0.0217		0.01536	0.02057	-0.00391	0.00126	0.0122	0.00437	0.00158	-0.00309		0.00023593	0.000423125	1.52881e-05	1.5876e-06	0.00014884	1.90969e-05	2.4964e-06	9.5481e-06
45.8	0.04031	0.04622	0.02449	0.02336	0.0264	0.03337	0.02783	0.02041		0.0255	0.0258	0.0279	0.0221	0.0195	0.0272	0.0235	0.0215		0.01481	0.02042	-0.00341	0.00126	0.0069	0.00617	0.00433	-0.00109		0.000219336	0.000416976	1.16281e-05	1.5876e-06	4.761e-05	3.80689e-05	1.87489e-05	1.1881e-06
46	0.04161	0.04652	0.02734	0.02401	0.0329	0.03302	0.02508	0.01961		0.0253	0.0256	0.0278	0.022	0.0195	0.0271	0.0234	0.0214		0.01631	0.02092	-0.00046	0.00201	0.0134	0.00592	0.00168	-0.00179		0.000266016	0.000437646	2.116e-07	4.0401e-06	0.00017956	3.50464e-05	2.8224e-06	3.2041e-06
46.2	0.03976	0.04447	0.02319	0.02661	0.02725	0.03247	0.02528	0.02046		0.025	0.0257	0.0278	0.0218	0.0193	0.0269	0.0233	0.0213		0.01476	0.01877	-0.00461	0.00481	0.00795	0.00557	0.00198	-0.00084		0.000217858	0.000352313	2.12521e-05	2.31361e-05	6.32025e-05	3.10249e-05	3.9204e-06	7.056e-07
46.4	0.04046	0.04407	0.02594	0.02486	0.02425	0.03172	0.02133	0.01751		0.0248	0.0259	0.0277	0.0216	0.0191	0.0267	0.0232	0.0213		0.01566	0.01817	-0.00176	0.00326	0.00515	0.00502	-0.00187	-0.00379		0.000245236	0.000330149	3.0976e-06	1.06276e-05	2.65225e-05	2.52004e-05	3.4969e-06	1.43641e-05
46.6	0.04031	0.04572	0.02469	0.02251	0.02345	0.02942	0.02243	0.01851		0.0246	0.026	0.0276	0.0214	0.019	0.0266	0.0229	0.0211		0.01571	0.01972	-0.00291	0.00111	0.00445	0.00282	-0.00047	-0.00259		0.000246804	0.000388878	8.4681e-06	1.2321e-06	1.98025e-05	7.9524e-06	2.209e-07	6.7081e-06
46.8	0.03886	0.04892	0.02339	0.02041	0.02365	0.03222	0.02438	0.01886		0.0244	0.0263	0.0276	0.0211	0.0187	0.0264	0.0227	0.021		0.01446	0.02262	-0.00421	-0.00069	0.00495	0.00582	0.00168	-0.00214		0.000209092	0.000511664	1.77241e-05	4.761e-07	2.45025e-05	3.38724e-05	2.8224e-06	4.5796e-06
47	0.04021	0.05087	0.02499	0.02331	0.02395	0.03592	0.02588	0.01876		0.0243	0.0262	0.0275	0.0209	0.0185	0.0262	0.0225	0.0208		0.01591	0.02467	-0.00251	0.00241	0.00545	0.00972	0.00338	-0.00204		0.000253128	0.000608609	6.3001e-06	5.8081e-06	2.97025e-05	9.44784e-05	1.14244e-05	4.1616e-06
47.2	0.03741	0.04967	0.02414	0.02286	0.0246	0.03402	0.02273	0.01721		0.0242	0.026	0.0275	0.0208	0.0183	0.0261	0.0223	0.0206		0.01321	0.02367	-0.00336	0.00206	0.0063	0.00792	0.00043	-0.00339		0.000174504	0.000560269	1.12896e-05	4.2436e-06	3.969e-05	6.27264e-05	1.849e-07	1.14921e-05
47.4	0.03836	0.05062	0.02554	0.02086	0.0278	0.03767	0.02628	0.01881		0.0243	0.0257	0.0274	0.0208	0.0182	0.0261	0.0221	0.0204		0.01406	0.02492	-0.00186	6e-05	0.0096	0.01157	0.00418	-0.00159		0.000197684	0.000621006	3.4596e-06	3.6e-09	9.216e-05	0.000133865	1.74724e-05	2.5281e-06
47.6	0.03766	0.04887	0.02409	0.02411	0.02765	0.03007	0.02233	0.02046		0.0242	0.0255	0.0272	0.0207	0.0182	0.0261	0.0221	0.0202		0.01346	0.02337	-0.00311	0.00341	0.00945	0.00397	0.00023	0.00026		0.000181172	0.000546157	9.6721e-06	1.16281e-05	8.93025e-05	1.57609e-05	5.29e-08	6.76e-08
47.8	0.03826	0.04922	0.02369	0.02421	0.0294	0.02872	0.02458	0.01966		0.0241	0.0253	0.027	0.0208	0.0183	0.0261	0.0221	0.0201		0.01416	0.02392	-0.00331	0.00341	0.0111	0.00262	0.00248	-0.00044		0.000200506	0.000572166	1.09561e-05	1.16281e-05	0.00012321	6.8644e-06	6.1504e-06	1.936e-07
48	0.03711	0.04702	0.02474	0.02286	0.02785	0.02937	0.02208	0.02026		0.0241	0.025	0.0267	0.0208	0.0183	0.026	0.0221	0.0201		0.01301	0.02202	-0.00196	0.00206	0.00955	0.00337	-2e-05	0.00016		0.00016926	0.00048488	3.8416e-06	4.2436e-06	9.12025e-05	1.13569e-05	4e-10	2.56e-08
48.2	0.03721	0.04657	0.02329	0.02546	0.027	0.03257	0.02243	0.01916		0.0242	0.0248	0.0266	0.0208	0.0184	0.0259	0.0221	0.0201		0.01301	0.02177	-0.00331	0.00466	0.0086	0.00667	0.00033	-0.00094		0.00016926	0.000473933	1.09561e-05	2.17156e-05	7.396e-05	4.44889e-05	1.089e-07	8.836e-07
48.4	0.03751	0.04737	0.02439	0.02136	0.02365	0.03802	0.02418	0.01816		0.0241	0.0247	0.0265	0.0206	0.0184	0.0258	0.0221	0.0201		0.01341	0.02267	-0.00211	0.00076	0.00525	0.01222	0.00208	-0.00194		0.000179828	0.000513929	4.4521e-06	5.776e-07	2.75625e-05	0.000149328	4.3264e-06	3.7636e-06
48.6	0.03706	0.04752	0.02354	0.02216	0.02495	0.03542	0.02368	0.01846		0.0241	0.0247	0.0265	0.0206	0.0183	0.0256	0.022	0.0201		0.01296	0.02282	-0.00296	0.00156	0.00665	0.00982	0.00168	-0.00164		0.000167962	0.000520752	8.7616e-06	2.4336e-06	4.42225e-05	9.64324e-05	2.8224e-06	2.6896e-06
48.8	0.03841	0.04902	0.02329	0.02116	0.02645	0.03912	0.02313	0.01886		0.0239	0.0246	0.0265	0.0205	0.0182	0.0255	0.0218	0.0201		0.01451	0.02442	-0.00321	0.00066	0.00825	0.01362	0.00133	-0.00124		0.00021054	0.000596336	1.03041e-05	4.356e-07	6.80625e-05	0.000185504	1.7689e-06	1.5376e-06
49	0.03731	0.04612	0.02369	0.02061	0.02715	0.03087	0.02403	0.01941		0.0239	0.0245	0.0266	0.0204	0.018	0.0253	0.0217	0.02		0.01341	0.02162	-0.00291	0.00021	0.00915	0.00557	0.00233	-0.00059		0.000179828	0.000467424	8.4681e-06	4.41e-08	8.37225e-05	3.10249e-05	5.4289e-06	3.481e-07
49.2	0.03846	0.04617	0.02259	0.02056	0.0237	0.02712	0.02313	0.01986		0.0237	0.0245	0.0265	0.0203	0.0179	0.0253	0.0216	0.0199		0.01476	0.02167	-0.00391	0.00026	0.0058	0.00182	0.00153	-4e-05		0.000217858	0.000469589	1.52881e-05	6.76e-08	3.364e-05	3.3124e-06	2.3409e-06	1.6e-09
49.4	0.03706	0.04487	0.02399	0.02216	0.02135	0.02922	0.02418	0.01976		0.0237	0.0247	0.0265	0.0202	0.0178	0.0253	0.0215	0.0197		0.01336	0.02017	-0.00251	0.00196	0.00355	0.00392	0.00268	6e-05		0.00017849	0.000406829	6.3001e-06	3.8416e-06	1.26025e-05	1.53664e-05	7.1824e-06	3.6e-09
49.6	0.03711	0.04442	0.02314	0.02036	0.0226	0.02827	0.02128	0.01631		0.0236	0.0247	0.0264	0.0202	0.0178	0.0253	0.0214	0.0197		0.01351	0.01972	-0.00326	0.00016	0.0048	0.00297	-0.00012	-0.00339		0.00018252	0.000388878	1.06276e-05	2.56e-08	2.304e-05	8.8209e-06	1.44e-08	1.14921e-05
49.8	0.03671	0.04532	0.02229	0.02226	0.02245	0.03147	0.02123	0.01711		0.0238	0.0246	0.0263	0.0202	0.0177	0.0253	0.0214	0.0196		0.01291	0.02072	-0.00401	0.00206	0.00475	0.00617	-0.00017	-0.00249		0.000166668	0.000429318	1.60801e-05	4.2436e-06	2.25625e-05	3.80689e-05	2.89e-08	6.2001e-06
50	0.03686	0.04547	0.02319	0.02141	0.02015	0.02962	0.02373	0.01796		0.0238	0.0247	0.0262	0.0201	0.0178	0.0252	0.0215	0.0195		0.01306	0.02077	-0.00301	0.00131	0.00235	0.00442	0.00223	-0.00154		0.000170564	0.000431393	9.0601e-06	1.7161e-06	5.5225e-06	1.95364e-05	4.9729e-06	2.3716e-06
50.2	0.03636	0.04502	0.02194	0.02051	0.0208	0.03052	0.02278	0.01791		0.0239	0.0246	0.0261	0.0202	0.0178	0.0251	0.0215	0.0195		0.01246	0.02042	-0.00416	0.00031	0.003	0.00542	0.00128	-0.00159		0.000155252	0.000416976	1.73056e-05	9.61e-08	9e-06	2.93764e-05	1.6384e-06	2.5281e-06
50.4	0.03666	0.04512	0.02359	0.02121	0.02165	0.03057	0.02173	0.01796		0.0238	0.0246	0.0261	0.0202	0.0177	0.0251	0.0215	0.0196		0.01286	0.02052	-0.00251	0.00101	0.00395	0.00547	0.00023	-0.00164		0.00016538	0.00042107	6.3001e-06	1.0201e-06	1.56025e-05	2.99209e-05	5.29e-08	2.6896e-06
50.6	0.03656	0.04597	0.02259	0.02006	0.021	0.02977	0.02353	0.01736		0.0238	0.0247	0.0262	0.0202	0.0177	0.025	0.0214	0.0196		0.01276	0.02127	-0.00361	-0.00014	0.0033	0.00477	0.00213	-0.00224		0.000162818	0.000452413	1.30321e-05	1.96e-08	1.089e-05	2.27529e-05	4.5369e-06	5.0176e-06
50.8	0.03591	0.04742	0.02209	0.02186	0.0216	0.03182	0.02178	0.01991		0.0238	0.0248	0.0263	0.02	0.0177	0.025	0.0213	0.0196		0.01211	0.02262	-0.00421	0.00186	0.0039	0.00682	0.00048	0.00031		0.000146652	0.000511664	1.77241e-05	3.4596e-06	1.521e-05	4.65124e-05	2.304e-07	9.61e-08
51	0.03661	0.04502	0.02324	0.02086	0.02245	0.03152	0.01913	0.01971		0.0239	0.0248	0.0264	0.02	0.0176	0.025	0.0212	0.0194		0.01271	0.02022	-0.00316	0.00086	0.00485	0.00652	-0.00207	0.00031		0.000161544	0.000408848	9.9856e-06	7.396e-07	2.35225e-05	4.25104e-05	4.2849e-06	9.61e-08
51.2	0.03691	0.04547	0.02159	0.01971	0.02135	0.02647	0.02303	0.02031		0.024	0.0249	0.0266	0.02	0.0175	0.0249	0.0211	0.0194		0.01291	0.02057	-0.00501	-0.00029	0.00385	0.00157	0.00193	0.00091		0.000166668	0.000423125	2.51001e-05	8.41e-08	1.48225e-05	2.4649e-06	3.7249e-06	8.281e-07
51.4	0.03546	0.04557	0.02244	0.02181	0.02205	0.02972	0.02193	0.02046		0.0238	0.0251	0.0265	0.02	0.0175	0.0249	0.0211	0.0193		0.01166	0.02047	-0.00406	0.00181	0.00455	0.00482	0.00083	0.00116		0.000135956	0.000419021	1.64836e-05	3.2761e-06	2.07025e-05	2.32324e-05	6.889e-07	1.3456e-06
51.6	0.03576	0.04642	0.02404	0.02146	0.02235	0.02922	0.02388	0.01896		0.0238	0.025	0.0264	0.02	0.0175	0.025	0.021	0.0192		0.01196	0.02142	-0.00236	0.00146	0.00485	0.00422	0.00288	-0.00024		0.000143042	0.000458816	5.5696e-06	2.1316e-06	2.35225e-05	1.78084e-05	8.2944e-06	5.76e-08
51.8	0.03586	0.04797	0.02289	0.02006	0.02185	0.02937	0.02093	0.01836		0.0238	0.025	0.0265	0.02	0.0175	0.0251	0.0211	0.0191		0.01206	0.02297	-0.00361	6e-05	0.00435	0.00427	-0.00017	-0.00074		0.000145444	0.000527621	1.30321e-05	3.6e-09	1.89225e-05	1.82329e-05	2.89e-08	5.476e-07
52	0.03501	0.04752	0.02319	0.02046	0.0208	0.02997	0.02158	0.01981		0.0238	0.0251	0.0264	0.02	0.0176	0.0251	0.0211	0.0191		0.01121	0.02242	-0.00321	0.00046	0.0032	0.00487	0.00048	0.00071		0.000125664	0.000502656	1.03041e-05	2.116e-07	1.024e-05	2.37169e-05	2.304e-07	5.041e-07
52.2	0.03546	0.04912	0.02194	0.02091	0.02045	0.03017	0.02178	0.01926		0.0238	0.025	0.0262	0.02	0.0176	0.0251	0.0211	0.0191		0.01166	0.02412	-0.00426	0.00091	0.00285	0.00507	0.00068	0.00016		0.000135956	0.000581774	1.81476e-05	8.281e-07	8.1225e-06	2.57049e-05	4.624e-07	2.56e-08
52.4	0.03521	0.04737	0.02169	0.01841	0.0239	0.02692	0.02103	0.01861		0.0238	0.0253	0.0263	0.0201	0.0176	0.0251	0.0211	0.0191		0.01141	0.02207	-0.00461	-0.00169	0.0063	0.00182	-7e-05	-0.00049		0.000130188	0.000487085	2.12521e-05	2.8561e-06	3.969e-05	3.3124e-06	4.9e-09	2.401e-07
52.6	0.03626	0.04582	0.02124	0.02091	0.02195	0.02807	0.02208	0.01851		0.0239	0.0253	0.0263	0.02	0.0176	0.0251	0.0212	0.0192		0.01236	0.02052	-0.00506	0.00091	0.00435	0.00297	0.00088	-0.00069		0.00015277	0.00042107	2.56036e-05	8.281e-07	1.89225e-05	8.8209e-06	7.744e-07	4.761e-07
52.8	0.03581	0.04652	0.02089	0.01956	0.0249	0.02677	0.01973	0.01776		0.0241	0.0255	0.0265	0.02	0.0176	0.0251	0.0212	0.0192		0.01171	0.02102	-0.00561	-0.00044	0.0073	0.00167	-0.00147	-0.00144		0.000137124	0.00044184	3.14721e-05	1.936e-07	5.329e-05	2.7889e-06	2.1609e-06	2.0736e-06
53	0.03491	0.04637	0.02209	0.02011	0.02285	0.02792	0.02118	0.01771		0.0242	0.0256	0.0267	0.02	0.0175	0.0251	0.0211	0.0192		0.01071	0.02077	-0.00461	0.00011	0.00535	0.00282	8e-05	-0.00149		0.000114704	0.000431393	2.12521e-05	1.21e-08	2.86225e-05	7.9524e-06	6.4e-09	2.2201e-06
53.2	0.03616	0.04622	0.02224	0.02271	0.02095	0.02667	0.02258	0.01946		0.0243	0.0257	0.0268	0.0201	0.0175	0.0251	0.0211	0.0192		0.01186	0.02052	-0.00456	0.00261	0.00345	0.00157	0.00148	0.00026		0.00014066	0.00042107	2.07936e-05	6.8121e-06	1.19025e-05	2.4649e-06	2.1904e-06	6.76e-08
53.4	0.03596	0.04532	0.02189	0.01976	0.0215	0.03032	0.02058	0.01801		0.0245	0.026	0.027	0.0202	0.0176	0.0253	0.0211	0.0192		0.01146	0.01932	-0.00511	-0.00044	0.0039	0.00502	-0.00052	-0.00119		0.000131332	0.000373262	2.61121e-05	1.936e-07	1.521e-05	2.52004e-05	2.704e-07	1.4161e-06
53.6	0.03526	0.04432	0.02264	0.02166	0.0201	0.02722	0.02048	0.01836		0.0246	0.0261	0.027	0.0203	0.0177	0.0253	0.0212	0.0192		0.01066	0.01822	-0.00436	0.00136	0.0024	0.00192	-0.00072	-0.00084		0.000113636	0.000331968	1.90096e-05	1.8496e-06	5.76e-06	3.6864e-06	5.184e-07	7.056e-07
53.8	0.03596	0.04552	0.02119	0.01961	0.02185	0.02632	0.01963	0.01791		0.0249	0.0262	0.0272	0.0205	0.0179	0.0255	0.0213	0.0192		0.01106	0.01932	-0.00601	-0.00089	0.00395	0.00082	-0.00167	-0.00129		0.000122324	0.000373262	3.61201e-05	7.921e-07	1.56025e-05	6.724e-07	2.7889e-06	1.6641e-06
54	0.03601	0.05037	0.02269	0.02031	0.02175	0.03027	0.02013	0.01831		0.0252	0.0262	0.0273	0.0206	0.018	0.0256	0.0214	0.0193		0.01081	0.02417	-0.00461	-0.00029	0.00375	0.00467	-0.00127	-0.00099		0.000116856	0.000584189	2.12521e-05	8.41e-08	1.40625e-05	2.18089e-05	1.6129e-06	9.801e-07
54.2	0.03571	0.05132	0.02109	0.01976	0.02105	0.02817	0.02393	0.01761		0.0255	0.0263	0.0274	0.0208	0.0182	0.0258	0.0216	0.0194		0.01021	0.02502	-0.00631	-0.00104	0.00285	0.00237	0.00233	-0.00179		0.000104244	0.000626	3.98161e-05	1.0816e-06	8.1225e-06	5.6169e-06	5.4289e-06	3.2041e-06
54.4	0.03571	0.04842	0.02294	0.01841	0.02065	0.02882	0.02193	0.01706		0.0255	0.0263	0.0275	0.0209	0.0183	0.026	0.0217	0.0195		0.01021	0.02212	-0.00456	-0.00249	0.00235	0.00282	0.00023	-0.00244		0.000104244	0.000489294	2.07936e-05	6.2001e-06	5.5225e-06	7.9524e-06	5.29e-08	5.9536e-06
54.6	0.03586	0.04687	0.02224	0.02096	0.02415	0.02652	0.02043	0.01916		0.0254	0.026	0.0276	0.021	0.0184	0.0261	0.0218	0.0196		0.01046	0.02087	-0.00536	-4e-05	0.00575	0.00042	-0.00137	-0.00044		0.000109412	0.000435557	2.87296e-05	1.6e-09	3.30625e-05	1.764e-07	1.8769e-06	1.936e-07
54.8	0.03601	0.04767	0.02249	0.01971	0.02225	0.02717	0.01953	0.01826		0.0254	0.026	0.0277	0.0211	0.0185	0.0262	0.0219	0.0197		0.01061	0.02167	-0.00521	-0.00139	0.00375	0.00097	-0.00237	-0.00144		0.000112572	0.000469589	2.71441e-05	1.9321e-06	1.40625e-05	9.409e-07	5.6169e-06	2.0736e-06
55	0.03636	0.04847	0.02299	0.02111	0.02325	0.02857	0.02188	0.01886		0.0252	0.0261	0.0276	0.0211	0.0186	0.0261	0.022	0.0198		0.01116	0.02237	-0.00461	1e-05	0.00465	0.00247	-0.00012	-0.00094		0.000124546	0.000500417	2.12521e-05	1e-10	2.16225e-05	6.1009e-06	1.44e-08	8.836e-07
55.2	0.03616	0.04622	0.02219	0.01991	0.02325	0.02592	0.02133	0.01796		0.025	0.0265	0.0276	0.0211	0.0187	0.0262	0.022	0.0198		0.01116	0.01972	-0.00541	-0.00119	0.00455	-0.00028	-0.00067	-0.00184		0.000124546	0.000388878	2.92681e-05	1.4161e-06	2.07025e-05	7.84e-08	4.489e-07	3.3856e-06
55.4	0.03626	0.04712	0.02194	0.01901	0.0199	0.02647	0.02123	0.01846		0.025	0.027	0.0275	0.021	0.0187	0.0262	0.0221	0.0199		0.01126	0.02012	-0.00556	-0.00199	0.0012	0.00027	-0.00087	-0.00144		0.000126788	0.000404814	3.09136e-05	3.9601e-06	1.44e-06	7.29e-08	7.569e-07	2.0736e-06
55.6	0.03731	0.04512	0.02279	0.02096	0.0204	0.02722	0.02013	0.01846		0.0253	0.0273	0.0277	0.021	0.0187	0.0261	0.0221	0.02		0.01201	0.01782	-0.00491	-4e-05	0.0017	0.00112	-0.00197	-0.00154		0.00014424	0.000317552	2.41081e-05	1.6e-09	2.89e-06	1.2544e-06	3.8809e-06	2.3716e-06
55.8	0.03621	0.04492	0.02229	0.01806	0.02325	0.02602	0.02173	0.01631		0.0256	0.0279	0.0279	0.0209	0.0187	0.026	0.022	0.02		0.01061	0.01702	-0.00561	-0.00284	0.00455	2e-05	-0.00027	-0.00369		0.000112572	0.00028968	3.14721e-05	8.0656e-06	2.07025e-05	4e-10	7.29e-08	1.36161e-05
56	0.03706	0.04412	0.02384	0.02036	0.0261	0.02717	0.02098	0.01781		0.026	0.0279	0.0282	0.021	0.0186	0.026	0.022	0.02		0.01106	0.01622	-0.00436	-0.00064	0.0075	0.00117	-0.00102	-0.00219		0.000122324	0.000263088	1.90096e-05	4.096e-07	5.625e-05	1.3689e-06	1.0404e-06	4.7961e-06
56.2	0.03696	0.04302	0.02194	0.01836	0.02205	0.02522	0.02338	0.01986		0.0265	0.0277	0.0287	0.0213	0.0186	0.0262	0.022	0.02		0.01046	0.01532	-0.00676	-0.00294	0.00345	-0.00098	0.00138	-0.00014		0.000109412	0.000234702	4.56976e-05	8.6436e-06	1.19025e-05	9.604e-07	1.9044e-06	1.96e-08
56.4	0.03666	0.04482	0.02439	0.02156	0.02175	0.02527	0.01988	0.01786		0.0267	0.0276	0.0289	0.0216	0.0186	0.0265	0.0221	0.02		0.00996	0.01722	-0.00451	-4e-05	0.00315	-0.00123	-0.00222	-0.00214		9.92016e-05	0.000296528	2.03401e-05	1.6e-09	9.9225e-06	1.5129e-06	4.9284e-06	4.5796e-06
56.6	0.03706	0.04662	0.02424	0.01991	0.0202	0.02722	0.02188	0.01861		0.0268	0.0279	0.0288	0.0218	0.0189	0.0269	0.0223	0.02		0.01026	0.01872	-0.00456	-0.00189	0.0013	0.00032	-0.00042	-0.00139		0.000105268	0.000350438	2.07936e-05	3.5721e-06	1.69e-06	1.024e-07	1.764e-07	1.9321e-06
56.8	0.03696	0.04597	0.02264	0.02111	0.0217	0.03132	0.01753	0.01761		0.0267	0.0277	0.0287	0.0222	0.0192	0.0273	0.0225	0.02		0.01026	0.01827	-0.00606	-0.00109	0.0025	0.00402	-0.00497	-0.00239		0.000105268	0.000333793	3.67236e-05	1.1881e-06	6.25e-06	1.61604e-05	2.47009e-05	5.7121e-06
57	0.03736	0.04332	0.02399	0.02026	0.0211	0.02837	0.02188	0.01806		0.0268	0.0277	0.0288	0.0223	0.0195	0.0274	0.0228	0.0201		0.01056	0.01562	-0.00481	-0.00204	0.0016	0.00097	-0.00092	-0.00204		0.000111514	0.000243984	2.31361e-05	4.1616e-06	2.56e-06	9.409e-07	8.464e-07	4.1616e-06
57.2	0.03741	0.04482	0.02244	0.02196	0.0223	0.02582	0.02248	0.01636		0.0268	0.0279	0.0288	0.0222	0.0198	0.0274	0.0231	0.0203		0.01061	0.01692	-0.00636	-0.00024	0.0025	-0.00158	-0.00062	-0.00394		0.000112572	0.000286286	4.04496e-05	5.76e-08	6.25e-06	2.4964e-06	3.844e-07	1.55236e-05
57.4	0.03681	0.04497	0.02499	0.01996	0.0249	0.02677	0.02093	0.01976		0.0266	0.0276	0.0289	0.0222	0.0198	0.0274	0.0231	0.0206		0.01021	0.01737	-0.00391	-0.00224	0.0051	-0.00063	-0.00217	-0.00084		0.000104244	0.000301717	1.52881e-05	5.0176e-06	2.601e-05	3.969e-07	4.7089e-06	7.056e-07
57.6	0.03711	0.04552	0.02289	0.02396	0.02585	0.02747	0.02413	0.01816		0.0266	0.0275	0.0291	0.0222	0.0197	0.0274	0.0231	0.0209		0.01051	0.01802	-0.00621	0.00176	0.00615	7e-05	0.00103	-0.00274		0.00011046	0.00032472	3.85641e-05	3.0976e-06	3.78225e-05	4.9e-09	1.0609e-06	7.5076e-06
57.8	0.03781	0.04447	0.02209	0.02011	0.0266	0.02692	0.02208	0.01896		0.0264	0.0276	0.029	0.0222	0.0197	0.0273	0.0231	0.021		0.01141	0.01687	-0.00691	-0.00209	0.0069	-0.00038	-0.00102	-0.00204		0.000130188	0.000284597	4.77481e-05	4.3681e-06	4.761e-05	1.444e-07	1.0404e-06	4.1616e-06
58	0.03711	0.04682	0.02254	0.02051	0.0288	0.02742	0.02073	0.01806		0.026	0.0277	0.0288	0.0221	0.0197	0.0273	0.023	0.0209		0.01111	0.01912	-0.00626	-0.00159	0.0091	0.00012	-0.00227	-0.00284		0.000123432	0.000365574	3.91876e-05	2.5281e-06	8.281e-05	1.44e-08	5.1529e-06	8.0656e-06
58.2	0.03761	0.04937	0.02154	0.02006	0.02295	0.02647	0.02248	0.01916		0.026	0.0276	0.0288	0.022	0.0196	0.0274	0.023	0.0208		0.01161	0.02177	-0.00726	-0.00194	0.00335	-0.00093	-0.00052	-0.00164		0.000134792	0.000473933	5.27076e-05	3.7636e-06	1.12225e-05	8.649e-07	2.704e-07	2.6896e-06
58.4	0.03686	0.05132	0.02349	0.02336	0.02485	0.02642	0.02178	0.01986		0.0264	0.0276	0.0287	0.0219	0.0197	0.0272	0.023	0.0208		0.01046	0.02372	-0.00521	0.00146	0.00515	-0.00078	-0.00122	-0.00094		0.000109412	0.000562638	2.71441e-05	2.1316e-06	2.65225e-05	6.084e-07	1.4884e-06	8.836e-07
58.6	0.03676	0.04957	0.02349	0.02086	0.02355	0.02702	0.02353	0.01876		0.0269	0.0275	0.0285	0.022	0.0199	0.0271	0.023	0.0208		0.00986	0.02207	-0.00501	-0.00114	0.00365	-8e-05	0.00053	-0.00204		9.72196e-05	0.000487085	2.51001e-05	1.2996e-06	1.33225e-05	6.4e-09	2.809e-07	4.1616e-06
58.8	0.03721	0.04937	0.02144	0.02091	0.02495	0.02792	0.02153	0.01666		0.0271	0.0276	0.0285	0.0221	0.0198	0.0271	0.0231	0.0208		0.01011	0.02177	-0.00706	-0.00119	0.00515	0.00082	-0.00157	-0.00414		0.000102212	0.000473933	4.98436e-05	1.4161e-06	2.65225e-05	6.724e-07	2.4649e-06	1.71396e-05
59	0.03686	0.04882	0.02369	0.02296	0.0258	0.03112	0.02198	0.01726		0.027	0.0277	0.0285	0.0223	0.0198	0.0272	0.0232	0.0211		0.00986	0.02112	-0.00481	0.00066	0.006	0.00392	-0.00122	-0.00384		9.72196e-05	0.000446054	2.31361e-05	4.356e-07	3.6e-05	1.53664e-05	1.4884e-06	1.47456e-05
59.2	0.03836	0.04712	0.02344	0.02206	0.0274	0.02967	0.02228	0.01661		0.0269	0.0279	0.0288	0.0224	0.0198	0.0272	0.0233	0.0211		0.01146	0.01922	-0.00536	-0.00034	0.0076	0.00247	-0.00102	-0.00449		0.000131332	0.000369408	2.87296e-05	1.156e-07	5.776e-05	6.1009e-06	1.0404e-06	2.01601e-05
59.4	0.03736	0.04587	0.02459	0.01946	0.02775	0.02847	0.02173	0.01706		0.0268	0.028	0.0292	0.0225	0.0198	0.0274	0.0234	0.0211		0.01056	0.01787	-0.00461	-0.00304	0.00795	0.00107	-0.00167	-0.00404		0.000111514	0.000319337	2.12521e-05	9.2416e-06	6.32025e-05	1.1449e-06	2.7889e-06	1.63216e-05
59.6	0.03796	0.04642	0.02274	0.02311	0.02575	0.02852	0.02268	0.02011		0.0269	0.0282	0.0295	0.0224	0.0198	0.0274	0.0233	0.0211		0.01106	0.01822	-0.00676	0.00071	0.00595	0.00112	-0.00062	-0.00099		0.000122324	0.000331968	4.56976e-05	5.041e-07	3.54025e-05	1.2544e-06	3.844e-07	9.801e-07
59.8	0.03706	0.04827	0.02204	0.02016	0.03275	0.02817	0.02248	0.01871		0.027	0.0285	0.0297	0.0224	0.0198	0.0275	0.0233	0.021		0.01006	0.01977	-0.00766	-0.00224	0.01295	0.00067	-0.00082	-0.00229		0.000101204	0.000390853	5.86756e-05	5.0176e-06	0.000167702	4.489e-07	6.724e-07	5.2441e-06
										0.0271	0.0291	0.0297	0.0224	0.0197	0.0276	0.0233	0.021		-0.0271	-0.0291	-0.0297	-0.0224	-0.0197	-0.0276	-0.0233	-0.021		0.00073441	0.00084681	0.00088209	0.00050176	0.00038809	0.00076176	0.00054289	0.000441

## Sheet: RMSE_BR_1
t	S3	S4	S5	S6	S7	S8	S9	S10		HEC_M1_P3	HEC_M1_P4	HEC_M1_P5	HEC_M1_P6	HEC_M1_P7	HEC_M1_P8	HEC_M1_P9	HEC_M1_P10		Error_3	Error_4	Error_5	Error_6	Error_7	Error_8	Error_9	Error_10		Error^2_3	Error^2_4	Error^2_5	Error^2_6	Error^2_7	Error^2_8	Error^2_9	Error^2_10		RMSE_3	RMSE_4	RMSE_5	RMSE_6	RMSE_7	RMSE_8	RMSE_9	RMSE_10
0	0.00011	-8e-05	0.00039	6e-05	0	-3e-05	-7e-05	-4e-05		0	0	0	0	0	0	0	0		0.00011	-8e-05	0.00039	6e-05	0	-3e-05	-7e-05	-4e-05		1.21e-08	6.4e-09	1.521e-07	3.6e-09	0	9e-10	4.9e-09	1.6e-09		1.01898	1.20776	1.20921	0.516801	0.57421	0.621822	0.514058	0.250854
0.2	-0.00014	7e-05	-6e-05	0.00011	0	-3e-05	-7e-05	-9e-05		0	0	0	0	0	0	0	0		-0.00014	7e-05	-6e-05	0.00011	0	-3e-05	-7e-05	-9e-05		1.96e-08	4.9e-09	3.6e-09	1.21e-08	0	9e-10	4.9e-09	8.1e-09
0.4	-0.00014	-3e-05	-6e-05	6e-05	-0.00015	0.00012	-2e-05	-9e-05		0	0	0	0	0	0	0	0		-0.00014	-3e-05	-6e-05	6e-05	-0.00015	0.00012	-2e-05	-9e-05		1.96e-08	9e-10	3.6e-09	3.6e-09	2.25e-08	1.44e-08	4e-10	8.1e-09
0.6	6e-05	2e-05	-6e-05	6e-05	5e-05	-8e-05	3e-05	-9e-05		0	0	0	0	0	0	0	0		6e-05	2e-05	-6e-05	6e-05	5e-05	-8e-05	3e-05	-9e-05		3.6e-09	4e-10	3.6e-09	3.6e-09	2.5e-09	6.4e-09	9e-10	8.1e-09
0.8	1e-05	-0.00013	4e-05	6e-05	-5e-05	-3e-05	3e-05	-9e-05		0	0	0	0	0	0	0	0		1e-05	-0.00013	4e-05	6e-05	-5e-05	-3e-05	3e-05	-9e-05		1e-10	1.69e-08	1.6e-09	3.6e-09	2.5e-09	9e-10	9e-10	8.1e-09
1	-0.00014	0.00017	-6e-05	6e-05	-0.00015	0.00012	3e-05	-0.00014		0	0	0	0	0	0	0	0		-0.00014	0.00017	-6e-05	6e-05	-0.00015	0.00012	3e-05	-0.00014		1.96e-08	2.89e-08	3.6e-09	3.6e-09	2.25e-08	1.44e-08	9e-10	1.96e-08
1.2	1e-05	-3e-05	-0.00021	1e-05	0.0001	-3e-05	-2e-05	-0.00014		0	0	0	0	0	0	0	0		1e-05	-3e-05	-0.00021	1e-05	0.0001	-3e-05	-2e-05	-0.00014		1e-10	9e-10	4.41e-08	1e-10	1e-08	9e-10	4e-10	1.96e-08
1.4	1e-05	-3e-05	9e-05	6e-05	0	-3e-05	-2e-05	-0.00014		0	0	0	0	0	0	0	0		1e-05	-3e-05	9e-05	6e-05	0	-3e-05	-2e-05	-0.00014		1e-10	9e-10	8.1e-09	3.6e-09	0	9e-10	4e-10	1.96e-08
1.6	0.00026	-0.00013	4e-05	-4e-05	-5e-05	0.00012	-2e-05	-0.00014		0	0	0	0	0	0	0	0		0.00026	-0.00013	4e-05	-4e-05	-5e-05	0.00012	-2e-05	-0.00014		6.76e-08	1.69e-08	1.6e-09	1.6e-09	2.5e-09	1.44e-08	4e-10	1.96e-08
1.8	1e-05	0.00027	-1e-05	-4e-05	0.0002	-0.00013	3e-05	-0.00014		0	0	0	0	0	0	0	0		1e-05	0.00027	-1e-05	-4e-05	0.0002	-0.00013	3e-05	-0.00014		1e-10	7.29e-08	1e-10	1.6e-09	4e-08	1.69e-08	9e-10	1.96e-08
2	-9e-05	2e-05	-1e-05	1e-05	0	-3e-05	0.00013	-9e-05		0	0	0	0	0	0	0	0		-9e-05	2e-05	-1e-05	1e-05	0	-3e-05	0.00013	-9e-05		8.1e-09	4e-10	1e-10	1e-10	0	9e-10	1.69e-08	8.1e-09
2.2	0.00011	-0.00018	-1e-05	-4e-05	0	0.00012	0.00013	-9e-05		0	0	0	0	0	0	0	0		0.00011	-0.00018	-1e-05	-4e-05	0	0.00012	0.00013	-9e-05		1.21e-08	3.24e-08	1e-10	1.6e-09	0	1.44e-08	1.69e-08	8.1e-09
2.4	1e-05	-0.00013	-1e-05	1e-05	-0.00015	-0.00013	0.00013	1e-05		0	0	0	0	0	0	0	0		1e-05	-0.00013	-1e-05	1e-05	-0.00015	-0.00013	0.00013	1e-05		1e-10	1.69e-08	1e-10	1e-10	2.25e-08	1.69e-08	1.69e-08	1e-10
2.6	-9e-05	0.00032	-0.00016	-4e-05	5e-05	7e-05	0.00023	0.00011		0	0	0	0	0	0	0	0		-9e-05	0.00032	-0.00016	-4e-05	5e-05	7e-05	0.00023	0.00011		8.1e-09	1.024e-07	2.56e-08	1.6e-09	2.5e-09	4.9e-09	5.29e-08	1.21e-08
2.8	0.00011	7e-05	4e-05	-4e-05	0	0.00012	-7e-05	0.00031		0	0	0	0	0	0	0	0		0.00011	7e-05	4e-05	-4e-05	0	0.00012	-7e-05	0.00031		1.21e-08	4.9e-09	1.6e-09	1.6e-09	0	1.44e-08	4.9e-09	9.61e-08
3	1e-05	-8e-05	4e-05	-4e-05	-0.00015	-0.00013	-0.00012	0.00021		0	0	0	0	0	0	0	0		1e-05	-8e-05	4e-05	-4e-05	-0.00015	-0.00013	-0.00012	0.00021		1e-10	6.4e-09	1.6e-09	1.6e-09	2.25e-08	1.69e-08	1.44e-08	4.41e-08
3.2	-0.00014	-0.00013	-0.00016	-9e-05	0.0001	-0.00013	-0.00012	0.00011		0	0	0	0	0	0	0	0		-0.00014	-0.00013	-0.00016	-9e-05	0.0001	-0.00013	-0.00012	0.00011		1.96e-08	1.69e-08	2.56e-08	8.1e-09	1e-08	1.69e-08	1.44e-08	1.21e-08
3.4	6e-05	0.00017	0.00034	-4e-05	0	0.00012	-7e-05	0.00011		0	0	0	0	0	0	0	0		6e-05	0.00017	0.00034	-4e-05	0	0.00012	-7e-05	0.00011		3.6e-09	2.89e-08	1.156e-07	1.6e-09	0	1.44e-08	4.9e-09	1.21e-08
3.6	1e-05	-3e-05	-6e-05	-9e-05	0	-0.00018	-7e-05	0.00016		0	0	0	0	0	0	0	0		1e-05	-3e-05	-6e-05	-9e-05	0	-0.00018	-7e-05	0.00016		1e-10	9e-10	3.6e-09	8.1e-09	0	3.24e-08	4.9e-09	2.56e-08
3.8	-0.00014	2e-05	-1e-05	-4e-05	0.0002	7e-05	-2e-05	0.00011		0	0	0	0	0	0	0	0		-0.00014	2e-05	-1e-05	-4e-05	0.0002	7e-05	-2e-05	0.00011		1.96e-08	4e-10	1e-10	1.6e-09	4e-08	4.9e-09	4e-10	1.21e-08
4	1e-05	-8e-05	-0.00016	-9e-05	0	2e-05	-2e-05	6e-05		0	0	0	0	0	0	0	0		1e-05	-8e-05	-0.00016	-9e-05	0	2e-05	-2e-05	6e-05		1e-10	6.4e-09	2.56e-08	8.1e-09	0	4e-10	4e-10	3.6e-09
4.2	-4e-05	7e-05	-1e-05	-9e-05	-5e-05	-0.00018	-0.00017	6e-05		0	0	0	0	0	0	0	0		-4e-05	7e-05	-1e-05	-9e-05	-5e-05	-0.00018	-0.00017	6e-05		1.6e-09	4.9e-09	1e-10	8.1e-09	2.5e-09	3.24e-08	2.89e-08	3.6e-09
4.4	0.00011	7e-05	-0.00016	-9e-05	5e-05	-8e-05	3e-05	6e-05		0	0	0	0	0	0	0	0		0.00011	7e-05	-0.00016	-9e-05	5e-05	-8e-05	3e-05	6e-05		1.21e-08	4.9e-09	2.56e-08	8.1e-09	2.5e-09	6.4e-09	9e-10	3.6e-09
4.6	-4e-05	-3e-05	-0.00021	-4e-05	5e-05	2e-05	3e-05	1e-05		0	0	0	0	0	0	0	0		-4e-05	-3e-05	-0.00021	-4e-05	5e-05	2e-05	3e-05	1e-05		1.6e-09	9e-10	4.41e-08	1.6e-09	2.5e-09	4e-10	9e-10	1e-10
4.8	-9e-05	-8e-05	4e-05	-4e-05	-5e-05	-0.00023	-2e-05	6e-05		0	0	0	0	0	0	0	0		-9e-05	-8e-05	4e-05	-4e-05	-5e-05	-0.00023	-2e-05	6e-05		8.1e-09	6.4e-09	1.6e-09	1.6e-09	2.5e-09	5.29e-08	4e-10	3.6e-09
5	0.00016	-8e-05	-6e-05	1e-05	-0.0002	-3e-05	3e-05	1e-05		0	0	0	0	0	0	0	0		0.00016	-8e-05	-6e-05	1e-05	-0.0002	-3e-05	3e-05	1e-05		2.56e-08	6.4e-09	3.6e-09	1e-10	4e-08	9e-10	9e-10	1e-10
5.2	-4e-05	7e-05	-0.00011	1e-05	5e-05	-3e-05	8e-05	1e-05		0	0	0	0	0	0	0	0		-4e-05	7e-05	-0.00011	1e-05	5e-05	-3e-05	8e-05	1e-05		1.6e-09	4.9e-09	1.21e-08	1e-10	2.5e-09	9e-10	6.4e-09	1e-10
5.4	-0.00014	2e-05	9e-05	-9e-05	-0.0001	-0.00018	8e-05	1e-05		0	0	0	0	0	0	0	0		-0.00014	2e-05	9e-05	-9e-05	-0.0001	-0.00018	8e-05	1e-05		1.96e-08	4e-10	8.1e-09	8.1e-09	1e-08	3.24e-08	6.4e-09	1e-10
5.6	6e-05	-3e-05	-6e-05	-0.00019	-0.0001	-0.00013	0.00013	-9e-05		0	0	0	0	0	0	0	0		6e-05	-3e-05	-6e-05	-0.00019	-0.0001	-0.00013	0.00013	-9e-05		3.6e-09	9e-10	3.6e-09	3.61e-08	1e-08	1.69e-08	1.69e-08	8.1e-09
5.8	1e-05	-8e-05	-6e-05	1e-05	0.0001	-8e-05	0.00033	-4e-05		0	0	0	0	0	0	0	0		1e-05	-8e-05	-6e-05	1e-05	0.0001	-8e-05	0.00033	-4e-05		1e-10	6.4e-09	3.6e-09	1e-10	1e-08	6.4e-09	1.089e-07	1.6e-09
6	-0.00014	7e-05	-0.00021	-4e-05	-0.0001	-3e-05	3e-05	1e-05		0	0	0	0	0	0	0	0		-0.00014	7e-05	-0.00021	-4e-05	-0.0001	-3e-05	3e-05	1e-05		1.96e-08	4.9e-09	4.41e-08	1.6e-09	1e-08	9e-10	9e-10	1e-10
6.2	6e-05	-3e-05	-1e-05	-4e-05	0	-0.00013	-0.00017	-4e-05		0	0	0	0	0	0	0	0		6e-05	-3e-05	-1e-05	-4e-05	0	-0.00013	-0.00017	-4e-05		3.6e-09	9e-10	1e-10	1.6e-09	0	1.69e-08	2.89e-08	1.6e-09
6.4	1e-05	-3e-05	4e-05	-4e-05	0.0002	2e-05	-0.00012	-4e-05		0	0	0	0	0	0	0	0		1e-05	-3e-05	4e-05	-4e-05	0.0002	2e-05	-0.00012	-4e-05		1e-10	9e-10	1.6e-09	1.6e-09	4e-08	4e-10	1.44e-08	1.6e-09
6.6	-0.00014	-0.00013	-0.00016	-4e-05	0	0.00032	-7e-05	1e-05		0	0	0	0	0	0	0	0		-0.00014	-0.00013	-0.00016	-4e-05	0	0.00032	-7e-05	1e-05		1.96e-08	1.69e-08	2.56e-08	1.6e-09	0	1.024e-07	4.9e-09	1e-10
6.8	1e-05	2e-05	0.00014	-9e-05	0	-0.00013	-7e-05	-4e-05		0	0	0	0	0	0	0	0		1e-05	2e-05	0.00014	-9e-05	0	-0.00013	-7e-05	-4e-05		1e-10	4e-10	1.96e-08	8.1e-09	0	1.69e-08	4.9e-09	1.6e-09
7	-4e-05	2e-05	-6e-05	-9e-05	-0.00015	-0.00018	-2e-05	1e-05		0	0	0	0	0	0	0	0		-4e-05	2e-05	-6e-05	-9e-05	-0.00015	-0.00018	-2e-05	1e-05		1.6e-09	4e-10	3.6e-09	8.1e-09	2.25e-08	3.24e-08	4e-10	1e-10
7.2	6e-05	-0.00013	-6e-05	-4e-05	5e-05	-3e-05	-2e-05	-4e-05		0	0	0	0	0	0	0	0		6e-05	-0.00013	-6e-05	-4e-05	5e-05	-3e-05	-2e-05	-4e-05		3.6e-09	1.69e-08	3.6e-09	1.6e-09	2.5e-09	9e-10	4e-10	1.6e-09
7.4	1e-05	-0.00018	-0.00016	-9e-05	0	-0.00018	8e-05	-0.00014		0	0	0	0	0	0	0	0		1e-05	-0.00018	-0.00016	-9e-05	0	-0.00018	8e-05	-0.00014		1e-10	3.24e-08	2.56e-08	8.1e-09	0	3.24e-08	6.4e-09	1.96e-08
7.6	-9e-05	0.00012	-6e-05	-0.00014	-0.0002	-8e-05	3e-05	-4e-05		0	0	0	0	0	0	0	0		-9e-05	0.00012	-6e-05	-0.00014	-0.0002	-8e-05	3e-05	-4e-05		8.1e-09	1.44e-08	3.6e-09	1.96e-08	4e-08	6.4e-09	9e-10	1.6e-09
7.8	0.00011	2e-05	-0.00026	-4e-05	5e-05	2e-05	3e-05	1e-05		0	0	0	0	0	0	0	0		0.00011	2e-05	-0.00026	-4e-05	5e-05	2e-05	3e-05	1e-05		1.21e-08	4e-10	6.76e-08	1.6e-09	2.5e-09	4e-10	9e-10	1e-10
8	-4e-05	-3e-05	-0.00021	-0.00014	-5e-05	-0.00018	-2e-05	-4e-05		0	0	0	0	0	0	0	0		-4e-05	-3e-05	-0.00021	-0.00014	-5e-05	-0.00018	-2e-05	-4e-05		1.6e-09	9e-10	4.41e-08	1.96e-08	2.5e-09	3.24e-08	4e-10	1.6e-09
8.2	-0.00014	-0.00018	4e-05	-0.00014	-0.0001	-3e-05	-2e-05	-9e-05		0	0	0	0	0	0	0	0		-0.00014	-0.00018	4e-05	-0.00014	-0.0001	-3e-05	-2e-05	-9e-05		1.96e-08	3.24e-08	1.6e-09	1.96e-08	1e-08	9e-10	4e-10	8.1e-09
8.4	6e-05	7e-05	-6e-05	-0.00014	0.0001	2e-05	8e-05	-9e-05		0	0	0	0	0	0	0	0		6e-05	7e-05	-6e-05	-0.00014	0.0001	2e-05	8e-05	-9e-05		3.6e-09	4.9e-09	3.6e-09	1.96e-08	1e-08	4e-10	6.4e-09	8.1e-09
8.6	1e-05	-3e-05	-0.00016	-9e-05	-5e-05	-0.00023	8e-05	-9e-05		0	0	0	0	0	0	0	0		1e-05	-3e-05	-0.00016	-9e-05	-5e-05	-0.00023	8e-05	-9e-05		1e-10	9e-10	2.56e-08	8.1e-09	2.5e-09	5.29e-08	6.4e-09	8.1e-09
8.8	-0.00014	-8e-05	0.00024	-0.00014	-5e-05	2e-05	8e-05	-0.00014		0	0	0	0	0	0	0	0		-0.00014	-8e-05	0.00024	-0.00014	-5e-05	2e-05	8e-05	-0.00014		1.96e-08	6.4e-09	5.76e-08	1.96e-08	2.5e-09	4e-10	6.4e-09	1.96e-08
9	6e-05	-0.00013	-6e-05	-0.00014	0	-3e-05	0.00013	-0.00014		0	0	0	0	0	0	0	0		6e-05	-0.00013	-6e-05	-0.00014	0	-3e-05	0.00013	-0.00014		3.6e-09	1.69e-08	3.6e-09	1.96e-08	0	9e-10	1.69e-08	1.96e-08
9.2	1e-05	0.00012	-6e-05	-0.00019	0	-0.00023	8e-05	-0.00014		0	0	0	0	0	0	0	0		1e-05	0.00012	-6e-05	-0.00019	0	-0.00023	8e-05	-0.00014		1e-10	1.44e-08	3.6e-09	3.61e-08	0	5.29e-08	6.4e-09	1.96e-08
9.4	-0.00014	-3e-05	-0.00021	-0.00019	0	-8e-05	-0.00012	-9e-05		0	0	0	0	0	0	0	0		-0.00014	-3e-05	-0.00021	-0.00019	0	-8e-05	-0.00012	-9e-05		1.96e-08	9e-10	4.41e-08	3.61e-08	0	6.4e-09	1.44e-08	8.1e-09
9.6	-4e-05	-8e-05	4e-05	-0.00019	-0.00015	-0.00013	-0.00012	-0.00014		0	0	0	0	0	0	0	0		-4e-05	-8e-05	4e-05	-0.00019	-0.00015	-0.00013	-0.00012	-0.00014		1.6e-09	6.4e-09	1.6e-09	3.61e-08	2.25e-08	1.69e-08	1.44e-08	1.96e-08
9.8	-4e-05	-0.00018	-1e-05	-0.00024	0	-0.00013	-0.00012	-0.00019		0	0	0	0	0	0	0	0		-4e-05	-0.00018	-1e-05	-0.00024	0	-0.00013	-0.00012	-0.00019		1.6e-09	3.24e-08	1e-10	5.76e-08	0	1.69e-08	1.44e-08	3.61e-08
10	1e-05	7e-05	-0.00021	-0.00019	-0.0002	-0.00013	-7e-05	-0.00014		0	0	0	0	0	0	0	0		1e-05	7e-05	-0.00021	-0.00019	-0.0002	-0.00013	-7e-05	-0.00014		1e-10	4.9e-09	4.41e-08	3.61e-08	4e-08	1.69e-08	4.9e-09	1.96e-08
10.2	-4e-05	-3e-05	9e-05	-0.00019	-0.0002	-8e-05	-7e-05	-0.00014		0	0	0	0	0	0	0	0		-4e-05	-3e-05	9e-05	-0.00019	-0.0002	-8e-05	-7e-05	-0.00014		1.6e-09	9e-10	8.1e-09	3.61e-08	4e-08	6.4e-09	4.9e-09	1.96e-08
10.4	-9e-05	-3e-05	-6e-05	-0.00024	5e-05	0.00027	-2e-05	-0.00019		0	0	0	0	0	0	0	0		-9e-05	-3e-05	-6e-05	-0.00024	5e-05	0.00027	-2e-05	-0.00019		8.1e-09	9e-10	3.6e-09	5.76e-08	2.5e-09	7.29e-08	4e-10	3.61e-08
10.6	0.00011	-0.00013	-0.00011	-0.00024	-0.0001	-0.00013	3e-05	-0.00014		0	0.0334	0	0	0	0	0	0		0.00011	-0.03353	-0.00011	-0.00024	-0.0001	-0.00013	3e-05	-0.00014		1.21e-08	0.00112426	1.21e-08	5.76e-08	1e-08	1.69e-08	9e-10	1.96e-08
10.8	-9e-05	0.00012	4e-05	-0.00024	-0.00015	-8e-05	-2e-05	-0.00019		0.0096	0.0316	0	0	0	0	0	0		-0.00969	-0.03148	4e-05	-0.00024	-0.00015	-8e-05	-2e-05	-0.00019		9.38961e-05	0.00099099	1.6e-09	5.76e-08	2.25e-08	6.4e-09	4e-10	3.61e-08
11	-9e-05	0.01222	-6e-05	-0.00024	0.00015	2e-05	-2e-05	-0.00014		0.0346	0.0542	0	0	0	0	0	0		-0.03469	-0.04198	-6e-05	-0.00024	0.00015	2e-05	-2e-05	-0.00014		0.0012034	0.00176232	3.6e-09	5.76e-08	2.25e-08	4e-10	4e-10	1.96e-08
11.2	0.00856	0.01177	-6e-05	-0.00034	0	-0.00013	-7e-05	-9e-05		0.0491	0.0656	0.031	0	0	0	0	0		-0.04054	-0.05383	-0.03106	-0.00034	0	-0.00013	-7e-05	-9e-05		0.00164349	0.00289767	0.000964724	1.156e-07	0	1.69e-08	4.9e-09	8.1e-09
11.4	0.01061	0.01367	0.00559	-0.00024	-5e-05	-8e-05	8e-05	1e-05		0.0523	0.0765	0.0284	0	0	0	0	0		-0.04169	-0.06283	-0.02281	-0.00024	-5e-05	-8e-05	8e-05	1e-05		0.00173806	0.00394761	0.000520296	5.76e-08	2.5e-09	6.4e-09	6.4e-09	1e-10
11.6	0.01181	0.02292	0.01494	-0.00024	-0.0002	2e-05	3e-05	0.00011		0.0545	0.0713	0.0309	0	0	0	0	0		-0.04269	-0.04838	-0.01596	-0.00024	-0.0002	2e-05	3e-05	0.00011		0.00182244	0.00234062	0.000254722	5.76e-08	4e-08	4e-10	9e-10	1.21e-08
11.8	0.01331	0.03092	0.01844	-0.00029	5e-05	-0.00023	-2e-05	0.00026		0.0547	0.0736	0.0341	0.0076	0	0.023	0	0		-0.04139	-0.04268	-0.01566	-0.00789	5e-05	-0.02323	-2e-05	0.00026		0.00171313	0.00182158	0.000245236	6.22521e-05	2.5e-09	0.000539633	4e-10	6.76e-08
12	0.01706	0.03382	0.01754	0.00066	0	0.00627	8e-05	0.00016		0.0607	0.0746	0.0378	0.0067	0	0.0332	0	0		-0.04364	-0.04078	-0.02026	-0.00604	0	-0.02693	8e-05	0.00016		0.00190445	0.00166301	0.000410468	3.64816e-05	0	0.000725225	6.4e-09	2.56e-08
12.2	0.01746	0.03642	0.01979	0.00136	-0.00015	0.01307	8e-05	0.00011		0.0616	0.0758	0.0423	0.0259	0.0228	0.034	0.0089	0		-0.04414	-0.03938	-0.02251	-0.02454	-0.02295	-0.02093	-0.00882	0.00011		0.00194834	0.00155078	0.0005067	0.000602212	0.000526703	0.000438065	7.77924e-05	1.21e-08
12.4	0.02076	0.04367	0.02344	0.00266	0.0067	0.01547	0.00033	6e-05		0.0613	0.0762	0.0421	0.0287	0.021	0.0376	0.0067	0		-0.04054	-0.03253	-0.01866	-0.02604	-0.0143	-0.02213	-0.00637	6e-05		0.00164349	0.0010582	0.000348196	0.000678082	0.00020449	0.000489737	4.05769e-05	3.6e-09
12.6	0.02851	0.04817	0.02414	0.01246	0.0123	0.01622	0.00098	6e-05		0.0669	0.0804	0.0414	0.0277	0.0236	0.0434	0.0067	0		-0.03839	-0.03223	-0.01726	-0.01524	-0.0113	-0.02718	-0.00572	6e-05		0.00147379	0.00103877	0.000297908	0.000232258	0.00012769	0.000738752	3.27184e-05	3.6e-09
12.8	0.03826	0.06057	0.02669	0.01386	0.01965	0.01752	0.00308	1e-05		0.0677	0.0819	0.041	0.0269	0.0276	0.0425	0.025	0		-0.02944	-0.02133	-0.01431	-0.01304	-0.00795	-0.02498	-0.02192	1e-05		0.000866714	0.000454969	0.000204776	0.000170042	6.32025e-05	0.000624	0.000480486	1e-10
13	0.04916	0.07412	0.02794	0.02156	0.02145	0.01862	0.00578	1e-05		0.0713	0.0835	0.0434	0.0277	0.0342	0.044	0.0279	0		-0.02214	-0.00938	-0.01546	-0.00614	-0.01275	-0.02538	-0.02212	1e-05		0.00049018	8.79844e-05	0.000239012	3.76996e-05	0.000162563	0.000644144	0.000489294	1e-10
13.2	0.06541	0.07367	0.02954	0.01996	0.0256	0.01972	0.01258	-0.00124		0.0689	0.0844	0.0446	0.0302	0.0321	0.0451	0.0274	0.0196		-0.00349	-0.01073	-0.01506	-0.01024	-0.0065	-0.02538	-0.01482	-0.02084		1.21801e-05	0.000115133	0.000226804	0.000104858	4.225e-05	0.000644144	0.000219632	0.000434306
13.4	0.08311	0.08617	0.03114	0.02486	0.02465	0.02162	0.01458	0.01201		0.0677	0.0866	0.0457	0.0341	0.0317	0.0485	0.0288	0.0197		0.01541	-0.00043	-0.01456	-0.00924	-0.00705	-0.02688	-0.01422	-0.00769		0.000237468	1.849e-07	0.000211994	8.53776e-05	4.97025e-05	0.000722534	0.000202208	5.91361e-05
13.6	0.09356	0.10002	0.03409	0.02051	0.02425	0.02432	0.01683	0.01401		0.0689	0.0846	0.0471	0.0363	0.0348	0.0503	0.0304	0.0223		0.02466	0.01542	-0.01301	-0.01579	-0.01055	-0.02598	-0.01357	-0.00829		0.000608116	0.000237776	0.00016926	0.000249324	0.000111302	0.00067496	0.000184145	6.87241e-05
13.8	0.09211	0.11207	0.03734	0.02026	0.0322	0.03217	0.01813	0.01666		0.0698	0.086	0.0477	0.0374	0.0352	0.0521	0.0329	0.0201		0.02231	0.02607	-0.01036	-0.01714	-0.003	-0.01993	-0.01477	-0.00344		0.000497736	0.000679645	0.00010733	0.00029378	9e-06	0.000397205	0.000218153	1.18336e-05
14	0.08721	0.10767	0.03649	0.02336	0.02875	0.03472	0.01658	0.01921		0.0687	0.0862	0.0485	0.0388	0.0349	0.0521	0.034	0.0164		0.01851	0.02147	-0.01201	-0.01544	-0.00615	-0.01738	-0.01742	0.00281		0.00034262	0.000460961	0.00014424	0.000238394	3.78225e-05	0.000302064	0.000303456	7.8961e-06
14.2	0.08866	0.08122	0.03739	0.02111	0.032	0.03662	0.02648	0.01711		0.0703	0.0866	0.0502	0.0394	0.0352	0.0523	0.0347	0.0189		0.01836	-0.00538	-0.01281	-0.01829	-0.0032	-0.01568	-0.00822	-0.00179		0.00033709	2.89444e-05	0.000164096	0.000334524	1.024e-05	0.000245862	6.75684e-05	3.2041e-06
14.4	0.06751	0.05867	0.03899	0.02611	0.0382	0.03537	0.03343	0.01686		0.0734	0.0869	0.051	0.0402	0.0365	0.0527	0.0348	0.0205		-0.00589	-0.02823	-0.01201	-0.01409	0.0017	-0.01733	-0.00137	-0.00364		3.46921e-05	0.000796933	0.00014424	0.000198528	2.89e-06	0.000300329	1.8769e-06	1.32496e-05
14.6	0.07586	0.06127	0.03879	0.02996	0.04085	0.03697	0.02658	0.01986		0.0721	0.0864	0.0519	0.041	0.0382	0.0533	0.0361	0.0212		0.00376	-0.02513	-0.01311	-0.01104	0.00265	-0.01633	-0.00952	-0.00134		1.41376e-05	0.000631517	0.000171872	0.000121882	7.0225e-06	0.000266669	9.06304e-05	1.7956e-06
14.8	0.07081	0.06082	0.03624	0.02856	0.0364	0.04277	0.02558	0.02331		0.0716	0.0862	0.0527	0.0427	0.0392	0.053	0.0392	0.0219		-0.00079	-0.02538	-0.01646	-0.01414	-0.0028	-0.01023	-0.01362	0.00141		6.241e-07	0.000644144	0.000270932	0.00019994	7.84e-06	0.000104653	0.000185504	1.9881e-06
15	0.05986	0.06542	0.03179	0.03486	0.04535	0.05187	0.03303	0.02011		0.0717	0.0885	0.0543	0.0437	0.0398	0.0529	0.0417	0.02		-0.01184	-0.02308	-0.02251	-0.00884	0.00555	-0.00103	-0.00867	0.00011		0.000140186	0.000532686	0.0005067	7.81456e-05	3.08025e-05	1.0609e-06	7.51689e-05	1.21e-08
15.2	0.05676	0.06552	0.03439	0.02776	0.04495	0.04847	0.03698	0.01876		0.0713	0.0907	0.0553	0.044	0.0404	0.0533	0.0423	0.0215		-0.01454	-0.02518	-0.02091	-0.01624	0.00455	-0.00483	-0.00532	-0.00274		0.000211412	0.000634032	0.000437228	0.000263738	2.07025e-05	2.33289e-05	2.83024e-05	7.5076e-06
15.4	0.05421	0.06997	0.03574	0.03796	0.0441	0.04777	0.03878	0.02191		0.0732	0.0913	0.0556	0.0439	0.0413	0.0532	0.0428	0.0264		-0.01899	-0.02133	-0.01986	-0.00594	0.0028	-0.00543	-0.00402	-0.00449		0.00036062	0.000454969	0.00039442	3.52836e-05	7.84e-06	2.94849e-05	1.61604e-05	2.01601e-05
15.6	0.05036	0.06872	0.03814	0.04091	0.0384	0.04587	0.03318	0.02261		0.0748	0.0913	0.0559	0.0445	0.0415	0.0535	0.0432	0.0278		-0.02444	-0.02258	-0.01776	-0.00359	-0.0031	-0.00763	-0.01002	-0.00519		0.000597314	0.000509856	0.000315418	1.28881e-05	9.61e-06	5.82169e-05	0.0001004	2.69361e-05
15.8	0.06066	0.07227	0.04424	0.03876	0.04365	0.04272	0.03988	0.02541		0.075	0.0892	0.0578	0.045	0.0421	0.0543	0.0436	0.0251		-0.01434	-0.01693	-0.01356	-0.00624	0.00155	-0.01158	-0.00372	0.00031		0.000205636	0.000286625	0.000183874	3.89376e-05	2.4025e-06	0.000134096	1.38384e-05	9.61e-08
16	0.06731	0.07332	0.03969	0.04041	0.0455	0.04337	0.03938	0.02546		0.0749	0.0901	0.0594	0.0461	0.0428	0.0544	0.0448	0.025		-0.00759	-0.01678	-0.01971	-0.00569	0.0027	-0.01103	-0.00542	0.00046		5.76081e-05	0.000281568	0.000388484	3.23761e-05	7.29e-06	0.000121661	2.93764e-05	2.116e-07
16.2	0.06436	0.06372	0.04259	0.03921	0.0442	0.04602	0.04133	0.03281		0.0742	0.0874	0.059	0.047	0.0434	0.0543	0.0458	0.0273		-0.00984	-0.02368	-0.01641	-0.00779	0.0008	-0.00828	-0.00447	0.00551		9.68256e-05	0.000560742	0.000269288	6.06841e-05	6.4e-07	6.85584e-05	1.99809e-05	3.03601e-05
16.4	0.06821	0.07677	0.04159	0.04831	0.0434	0.04847	0.03748	0.03076		0.0748	0.086	0.0593	0.0469	0.0443	0.0539	0.0463	0.0277		-0.00659	-0.00923	-0.01771	0.00141	-0.0009	-0.00543	-0.00882	0.00306		4.34281e-05	8.51929e-05	0.000313644	1.9881e-06	8.1e-07	2.94849e-05	7.77924e-05	9.3636e-06
16.6	0.06966	0.08267	0.04069	0.04286	0.0529	0.05132	0.03973	0.02791		0.0725	0.0853	0.0579	0.0475	0.0447	0.0538	0.0463	0.0252		-0.00284	-0.00263	-0.01721	-0.00464	0.0082	-0.00248	-0.00657	0.00271		8.0656e-06	6.9169e-06	0.000296184	2.15296e-05	6.724e-05	6.1504e-06	4.31649e-05	7.3441e-06
16.8	0.07811	0.07867	0.04249	0.04676	0.05315	0.04997	0.03463	0.02311		0.0713	0.0835	0.0576	0.0475	0.0444	0.0543	0.0467	0.027		0.00681	-0.00483	-0.01511	-0.00074	0.00875	-0.00433	-0.01207	-0.00389		4.63761e-05	2.33289e-05	0.000228312	5.476e-07	7.65625e-05	1.87489e-05	0.000145685	1.51321e-05
17	0.08626	0.08157	0.03964	0.05101	0.0476	0.05247	0.04443	0.02456		0.0731	0.0831	0.0587	0.0473	0.0449	0.054	0.047	0.0293		0.01316	-0.00153	-0.01906	0.00371	0.0027	-0.00153	-0.00257	-0.00474		0.000173186	2.3409e-06	0.000363284	1.37641e-05	7.29e-06	2.3409e-06	6.6049e-06	2.24676e-05
17.2	0.08441	0.08422	0.03949	0.04191	0.04965	0.04977	0.04223	0.02706		0.0707	0.0832	0.0581	0.0476	0.0441	0.0535	0.0469	0.0291		0.01371	0.00102	-0.01861	-0.00569	0.00555	-0.00373	-0.00467	-0.00204		0.000187964	1.0404e-06	0.000346332	3.23761e-05	3.08025e-05	1.39129e-05	2.18089e-05	4.1616e-06
17.4	0.08701	0.08477	0.03994	0.04271	0.0484	0.05367	0.04253	0.02731		0.07	0.0819	0.057	0.0476	0.0435	0.0542	0.047	0.0257		0.01701	0.00287	-0.01706	-0.00489	0.0049	-0.00053	-0.00447	0.00161		0.00028934	8.2369e-06	0.000291044	2.39121e-05	2.401e-05	2.809e-07	1.99809e-05	2.5921e-06
17.6	0.07881	0.08287	0.03749	0.03821	0.04505	0.05327	0.04738	0.03041		0.0701	0.082	0.0574	0.0472	0.0438	0.0535	0.0479	0.0272		0.00871	0.00087	-0.01991	-0.00899	0.00125	-0.00023	-0.00052	0.00321		7.58641e-05	7.569e-07	0.000396408	8.08201e-05	1.5625e-06	5.29e-08	2.704e-07	1.03041e-05
17.8	0.07731	0.08347	0.03819	0.04576	0.0425	0.05247	0.04328	0.03136		0.0688	0.0809	0.0572	0.047	0.0434	0.0531	0.0471	0.0291		0.00851	0.00257	-0.01901	-0.00124	-0.0009	-0.00063	-0.00382	0.00226		7.24201e-05	6.6049e-06	0.00036138	1.5376e-06	8.1e-07	3.969e-07	1.45924e-05	5.1076e-06
18	0.07666	0.08562	0.03779	0.04756	0.0511	0.05212	0.04523	0.02721		0.0676	0.081	0.0571	0.0473	0.0429	0.053	0.0467	0.0281		0.00906	0.00462	-0.01931	0.00026	0.0082	-0.00088	-0.00147	-0.00089		8.20836e-05	2.13444e-05	0.000372876	6.76e-08	6.724e-05	7.744e-07	2.1609e-06	7.921e-07
18.2	0.07911	0.08342	0.03909	0.04761	0.051	0.05922	0.03873	0.02861		0.067	0.0793	0.0566	0.047	0.043	0.0526	0.047	0.0255		0.01211	0.00412	-0.01751	0.00061	0.008	0.00662	-0.00827	0.00311		0.000146652	1.69744e-05	0.0003066	3.721e-07	6.4e-05	4.38244e-05	6.83929e-05	9.6721e-06
18.4	0.07806	0.07852	0.03529	0.04041	0.0569	0.05532	0.04853	0.02506		0.0667	0.0789	0.0559	0.0465	0.0427	0.0528	0.0463	0.0272		0.01136	-0.00038	-0.02061	-0.00609	0.0142	0.00252	0.00223	-0.00214		0.00012905	1.444e-07	0.000424772	3.70881e-05	0.00020164	6.3504e-06	4.9729e-06	4.5796e-06
18.6	0.07841	0.07867	0.03644	0.05411	0.04695	0.05227	0.04578	0.02576		0.0664	0.0781	0.0555	0.046	0.0424	0.0526	0.0462	0.0281		0.01201	0.00057	-0.01906	0.00811	0.00455	-0.00033	-0.00042	-0.00234		0.00014424	3.249e-07	0.000363284	6.57721e-05	2.07025e-05	1.089e-07	1.764e-07	5.4756e-06
18.8	0.08076	0.08132	0.03479	0.04241	0.05105	0.05247	0.04353	0.02801		0.0663	0.078	0.0552	0.0456	0.0422	0.0518	0.0463	0.0289		0.01446	0.00332	-0.02041	-0.00319	0.00885	0.00067	-0.00277	-0.00089		0.000209092	1.10224e-05	0.000416568	1.01761e-05	7.83225e-05	4.489e-07	7.6729e-06	7.921e-07
19	0.07706	0.08272	0.03654	0.04636	0.0543	0.06187	0.04563	0.02926		0.0652	0.0775	0.0545	0.0457	0.042	0.0513	0.046	0.025		0.01186	0.00522	-0.01796	0.00066	0.0123	0.01057	-0.00037	0.00426		0.00014066	2.72484e-05	0.000322562	4.356e-07	0.00015129	0.000111725	1.369e-07	1.81476e-05
19.2	0.07726	0.07862	0.03274	0.04636	0.0486	0.06807	0.05043	0.02821		0.0659	0.076	0.0548	0.0455	0.0418	0.051	0.0457	0.026		0.01136	0.00262	-0.02206	0.00086	0.0068	0.01707	0.00473	0.00221		0.00012905	6.8644e-06	0.000486644	7.396e-07	4.624e-05	0.000291385	2.23729e-05	4.8841e-06
19.4	0.07906	0.07647	0.03329	0.03971	0.0493	0.05462	0.04203	0.02636		0.0653	0.0757	0.0545	0.0453	0.0418	0.0507	0.0456	0.0283		0.01376	0.00077	-0.02121	-0.00559	0.0075	0.00392	-0.00357	-0.00194		0.000189338	5.929e-07	0.000449864	3.12481e-05	5.625e-05	1.53664e-05	1.27449e-05	3.7636e-06
19.6	0.07561	0.08287	0.03539	0.04016	0.054	0.04997	0.04878	0.02656		0.0646	0.0752	0.054	0.0452	0.0414	0.0507	0.0454	0.0293		0.01101	0.00767	-0.01861	-0.00504	0.0126	-0.00073	0.00338	-0.00274		0.00012122	5.88289e-05	0.000346332	2.54016e-05	0.00015876	5.329e-07	1.14244e-05	7.5076e-06
19.8	0.06921	0.08357	0.03439	0.05011	0.05205	0.05162	0.03913	0.02651		0.065	0.0745	0.0535	0.0452	0.0414	0.0506	0.0455	0.0267		0.00421	0.00907	-0.01911	0.00491	0.01065	0.00102	-0.00637	-0.00019		1.77241e-05	8.22649e-05	0.000365192	2.41081e-05	0.000113422	1.0404e-06	4.05769e-05	3.61e-08
20	0.07251	0.07517	0.03359	0.04581	0.0475	0.06012	0.04643	0.02841		0.0643	0.0736	0.0535	0.0449	0.0415	0.0503	0.0454	0.0258		0.00821	0.00157	-0.01991	0.00091	0.006	0.00982	0.00103	0.00261		6.74041e-05	2.4649e-06	0.000396408	8.281e-07	3.6e-05	9.64324e-05	1.0609e-06	6.8121e-06
20.2	0.07461	0.07322	0.03374	0.04361	0.04805	0.05912	0.04088	0.02961		0.0638	0.0731	0.0534	0.0447	0.0412	0.0502	0.045	0.0281		0.01081	0.00012	-0.01966	-0.00109	0.00685	0.00892	-0.00412	0.00151		0.000116856	1.44e-08	0.000386516	1.1881e-06	4.69225e-05	7.95664e-05	1.69744e-05	2.2801e-06
20.4	0.07411	0.07272	0.03259	0.04481	0.04695	0.05577	0.04968	0.02836		0.0639	0.0725	0.0535	0.0445	0.0411	0.0503	0.0448	0.0292		0.01021	0.00022	-0.02091	0.00031	0.00585	0.00547	0.00488	-0.00084		0.000104244	4.84e-08	0.000437228	9.61e-08	3.42225e-05	2.99209e-05	2.38144e-05	7.056e-07
20.6	0.07051	0.06922	0.03459	0.04176	0.0447	0.05437	0.04268	0.02691		0.0631	0.0719	0.0532	0.0443	0.0408	0.0502	0.0449	0.0273		0.00741	-0.00268	-0.01861	-0.00254	0.0039	0.00417	-0.00222	-0.00039		5.49081e-05	7.1824e-06	0.000346332	6.4516e-06	1.521e-05	1.73889e-05	4.9284e-06	1.521e-07
20.8	0.07006	0.07247	0.03779	0.04531	0.04605	0.05012	0.03968	0.02541		0.0633	0.0726	0.0526	0.0442	0.0407	0.0502	0.0448	0.025		0.00676	-0.00013	-0.01481	0.00111	0.00535	-8e-05	-0.00512	0.00041		4.56976e-05	1.69e-08	0.000219336	1.2321e-06	2.86225e-05	6.4e-09	2.62144e-05	1.681e-07
21	0.07141	0.06942	0.03589	0.04281	0.04915	0.04652	0.04328	0.02396		0.0626	0.0729	0.052	0.0443	0.0405	0.0496	0.0448	0.0278		0.00881	-0.00348	-0.01611	-0.00149	0.00865	-0.00308	-0.00152	-0.00384		7.76161e-05	1.21104e-05	0.000259532	2.2201e-06	7.48225e-05	9.4864e-06	2.3104e-06	1.47456e-05
21.2	0.06961	0.07017	0.03404	0.04411	0.0502	0.05617	0.03663	0.02631		0.0623	0.0728	0.0517	0.044	0.0403	0.0492	0.0446	0.0283		0.00731	-0.00263	-0.01766	0.00011	0.0099	0.00697	-0.00797	-0.00199		5.34361e-05	6.9169e-06	0.000311876	1.21e-08	9.801e-05	4.85809e-05	6.35209e-05	3.9601e-06
21.4	0.06981	0.07657	0.03364	0.03941	0.05025	0.05207	0.04488	0.02836		0.0623	0.0727	0.0521	0.0436	0.0401	0.0492	0.0443	0.0258		0.00751	0.00387	-0.01846	-0.00419	0.01015	0.00287	0.00058	0.00256		5.64001e-05	1.49769e-05	0.000340772	1.75561e-05	0.000103023	8.2369e-06	3.364e-07	6.5536e-06
21.6	0.07291	0.08447	0.03209	0.04501	0.04885	0.04987	0.04598	0.02801		0.0623	0.0724	0.0518	0.0435	0.0399	0.0494	0.0443	0.025		0.01061	0.01207	-0.01971	0.00151	0.00895	0.00047	0.00168	0.00301		0.000112572	0.000145685	0.000388484	2.2801e-06	8.01025e-05	2.209e-07	2.8224e-06	9.0601e-06
21.8	0.06981	0.07972	0.03409	0.04036	0.0446	0.05502	0.04103	0.02611		0.0617	0.0718	0.0513	0.0434	0.0398	0.0494	0.0446	0.0275		0.00811	0.00792	-0.01721	-0.00304	0.0048	0.00562	-0.00357	-0.00139		6.57721e-05	6.27264e-05	0.000296184	9.2416e-06	2.304e-05	3.15844e-05	1.27449e-05	1.9321e-06
22	0.06906	0.07917	0.03089	0.04221	0.04585	0.05482	0.04388	0.02666		0.0612	0.0709	0.0512	0.0432	0.0397	0.0491	0.0444	0.0279		0.00786	0.00827	-0.02031	-0.00099	0.00615	0.00572	-0.00052	-0.00124		6.17796e-05	6.83929e-05	0.000412496	9.801e-07	3.78225e-05	3.27184e-05	2.704e-07	1.5376e-06
22.2	0.06761	0.07577	0.03069	0.03986	0.0501	0.05122	0.03768	0.02606		0.0604	0.0703	0.0511	0.043	0.0396	0.0487	0.0441	0.0235		0.00721	0.00547	-0.02041	-0.00314	0.0105	0.00252	-0.00642	0.00256		5.19841e-05	2.99209e-05	0.000416568	9.8596e-06	0.00011025	6.3504e-06	4.12164e-05	6.5536e-06
22.4	0.07041	0.07037	0.03219	0.04101	0.0436	0.04952	0.04458	0.03166		0.0595	0.0702	0.051	0.0426	0.0394	0.0482	0.0439	0.0255		0.01091	0.00017	-0.01881	-0.00159	0.0042	0.00132	0.00068	0.00616		0.000119028	2.89e-08	0.000353816	2.5281e-06	1.764e-05	1.7424e-06	4.624e-07	3.79456e-05
22.6	0.06881	0.07157	0.03089	0.04486	0.04545	0.05312	0.03978	0.02636		0.0589	0.0694	0.0508	0.0423	0.0391	0.0479	0.0436	0.0272		0.00991	0.00217	-0.01991	0.00256	0.00635	0.00522	-0.00382	-0.00084		9.82081e-05	4.7089e-06	0.000396408	6.5536e-06	4.03225e-05	2.72484e-05	1.45924e-05	7.056e-07
22.8	0.06726	0.07132	0.02999	0.03686	0.0454	0.05347	0.04093	0.02656		0.0589	0.0691	0.0505	0.0421	0.0388	0.0477	0.0433	0.0274		0.00836	0.00222	-0.02051	-0.00524	0.0066	0.00577	-0.00237	-0.00084		6.98896e-05	4.9284e-06	0.00042066	2.74576e-05	4.356e-05	3.32929e-05	5.6169e-06	7.056e-07
23	0.06541	0.07512	0.03029	0.04761	0.0474	0.05477	0.03948	0.02391		0.0586	0.069	0.0503	0.0418	0.0384	0.0474	0.0431	0.0256		0.00681	0.00612	-0.02001	0.00581	0.009	0.00737	-0.00362	-0.00169		4.63761e-05	3.74544e-05	0.0004004	3.37561e-05	8.1e-05	5.43169e-05	1.31044e-05	2.8561e-06
23.2	0.06816	0.07192	0.03129	0.03671	0.0513	0.04967	0.04133	0.02721		0.0584	0.0683	0.0501	0.0417	0.0381	0.0472	0.043	0.0249		0.00976	0.00362	-0.01881	-0.00499	0.0132	0.00247	-0.00167	0.00231		9.52576e-05	1.31044e-05	0.000353816	2.49001e-05	0.00017424	6.1009e-06	2.7889e-06	5.3361e-06
23.4	0.06706	0.07177	0.03264	0.04291	0.04185	0.05122	0.04348	0.02741		0.0585	0.0684	0.0502	0.0416	0.0379	0.0469	0.0429	0.0267		0.00856	0.00337	-0.01756	0.00131	0.00395	0.00432	0.00058	0.00071		7.32736e-05	1.13569e-05	0.000308354	1.7161e-06	1.56025e-05	1.86624e-05	3.364e-07	5.041e-07
23.6	0.06556	0.07472	0.03154	0.04106	0.04105	0.04547	0.03843	0.02836		0.0581	0.0683	0.0502	0.0414	0.0379	0.0467	0.0428	0.0275		0.00746	0.00642	-0.01866	-0.00034	0.00315	-0.00123	-0.00437	0.00086		5.56516e-05	4.12164e-05	0.000348196	1.156e-07	9.9225e-06	1.5129e-06	1.90969e-05	7.396e-07
23.8	0.06931	0.07867	0.03239	0.03876	0.0415	0.04672	0.04058	0.02721		0.0577	0.0677	0.05	0.0413	0.0378	0.0467	0.0426	0.0227		0.01161	0.01097	-0.01761	-0.00254	0.0037	2e-05	-0.00202	0.00451		0.000134792	0.000120341	0.000310112	6.4516e-06	1.369e-05	4e-10	4.0804e-06	2.03401e-05
24	0.06516	0.07277	0.03154	0.04006	0.04555	0.04922	0.03828	0.02461		0.0573	0.0673	0.0496	0.041	0.0376	0.0466	0.0425	0.0235		0.00786	0.00547	-0.01806	-0.00094	0.00795	0.00262	-0.00422	0.00111		6.17796e-05	2.99209e-05	0.000326164	8.836e-07	6.32025e-05	6.8644e-06	1.78084e-05	1.2321e-06
24.2	0.06541	0.06802	0.03074	0.03906	0.0509	0.04892	0.04143	0.02436		0.0573	0.0667	0.0493	0.0406	0.0374	0.0466	0.0424	0.0262		0.00811	0.00132	-0.01856	-0.00154	0.0135	0.00232	-0.00097	-0.00184		6.57721e-05	1.7424e-06	0.000344474	2.3716e-06	0.00018225	5.3824e-06	9.409e-07	3.3856e-06
24.4	0.06706	0.07067	0.03139	0.03961	0.04015	0.04947	0.04038	0.02646		0.0567	0.0664	0.049	0.0404	0.0371	0.0465	0.0423	0.0263		0.01036	0.00427	-0.01761	-0.00079	0.00305	0.00297	-0.00192	0.00016		0.00010733	1.82329e-05	0.000310112	6.241e-07	9.3025e-06	8.8209e-06	3.6864e-06	2.56e-08
24.6	0.06921	0.06927	0.03174	0.04081	0.04155	0.04947	0.03693	0.02791		0.0563	0.0663	0.0487	0.0401	0.037	0.0461	0.0421	0.0217		0.01291	0.00297	-0.01696	0.00071	0.00455	0.00337	-0.00517	0.00621		0.000166668	8.8209e-06	0.000287642	5.041e-07	2.07025e-05	1.13569e-05	2.67289e-05	3.85641e-05
24.8	0.06461	0.07117	0.03129	0.03836	0.03905	0.04907	0.04058	0.02486		0.0563	0.0657	0.0487	0.04	0.0368	0.0457	0.0417	0.0236		0.00831	0.00547	-0.01741	-0.00164	0.00225	0.00337	-0.00112	0.00126		6.90561e-05	2.99209e-05	0.000303108	2.6896e-06	5.0625e-06	1.13569e-05	1.2544e-06	1.5876e-06
25	0.06586	0.06962	0.03109	0.03606	0.04335	0.04432	0.04208	0.02516		0.0567	0.0652	0.0487	0.04	0.0367	0.0452	0.0413	0.0259		0.00916	0.00442	-0.01761	-0.00394	0.00665	-0.00088	0.00078	-0.00074		8.39056e-05	1.95364e-05	0.000310112	1.55236e-05	4.42225e-05	7.744e-07	6.084e-07	5.476e-07
25.2	0.06271	0.06442	0.03309	0.03996	0.04475	0.04727	0.03873	0.02496		0.0564	0.0649	0.0483	0.0399	0.0364	0.0451	0.0411	0.0264		0.00631	-0.00048	-0.01521	6e-05	0.00835	0.00217	-0.00237	-0.00144		3.98161e-05	2.304e-07	0.000231344	3.6e-09	6.97225e-05	4.7089e-06	5.6169e-06	2.0736e-06
25.4	0.06366	0.06572	0.03154	0.03616	0.0414	0.05037	0.03878	0.02496		0.0564	0.0647	0.0484	0.0397	0.0362	0.0451	0.0412	0.022		0.00726	0.00102	-0.01686	-0.00354	0.0052	0.00527	-0.00242	0.00296		5.27076e-05	1.0404e-06	0.00028426	1.25316e-05	2.704e-05	2.77729e-05	5.8564e-06	8.7616e-06
25.6	0.06291	0.06462	0.03019	0.03946	0.04295	0.04717	0.04038	0.02716		0.0563	0.0642	0.0484	0.0395	0.036	0.0452	0.0413	0.0231		0.00661	0.00042	-0.01821	-4e-05	0.00695	0.00197	-0.00092	0.00406		4.36921e-05	1.764e-07	0.000331604	1.6e-09	4.83025e-05	3.8809e-06	8.464e-07	1.64836e-05
25.8	0.06586	0.06857	0.03134	0.03446	0.0444	0.04312	0.03753	0.02371		0.0559	0.0642	0.0483	0.0395	0.0359	0.0452	0.0412	0.0252		0.00996	0.00437	-0.01696	-0.00504	0.0085	-0.00208	-0.00367	-0.00149		9.92016e-05	1.90969e-05	0.000287642	2.54016e-05	7.225e-05	4.3264e-06	1.34689e-05	2.2201e-06
26	0.06616	0.06957	0.03199	0.03601	0.0384	0.04022	0.03778	0.02631		0.0553	0.0636	0.0481	0.0393	0.0359	0.0451	0.0411	0.0254		0.01086	0.00597	-0.01611	-0.00329	0.0025	-0.00488	-0.00332	0.00091		0.00011794	3.56409e-05	0.000259532	1.08241e-05	6.25e-06	2.38144e-05	1.10224e-05	8.281e-07
26.2	0.06071	0.06967	0.03084	0.03621	0.03635	0.04492	0.03953	0.02496		0.0551	0.0638	0.0479	0.0394	0.036	0.0449	0.0408	0.0221		0.00561	0.00587	-0.01706	-0.00319	0.00035	2e-05	-0.00127	0.00286		3.14721e-05	3.44569e-05	0.000291044	1.01761e-05	1.225e-07	4e-10	1.6129e-06	8.1796e-06
26.4	0.06276	0.07107	0.03059	0.03476	0.0376	0.04987	0.03623	0.02441		0.0546	0.0632	0.0475	0.0391	0.0359	0.0446	0.0406	0.0233		0.00816	0.00787	-0.01691	-0.00434	0.0017	0.00527	-0.00437	0.00111		6.65856e-05	6.19369e-05	0.000285948	1.88356e-05	2.89e-06	2.77729e-05	1.90969e-05	1.2321e-06
26.6	0.06461	0.06337	0.03094	0.03766	0.0405	0.04397	0.03733	0.02451		0.055	0.0632	0.0475	0.039	0.0358	0.0445	0.0404	0.0264		0.00961	0.00017	-0.01656	-0.00134	0.0047	-0.00053	-0.00307	-0.00189		9.23521e-05	2.89e-08	0.000274234	1.7956e-06	2.209e-05	2.809e-07	9.4249e-06	3.5721e-06
26.8	0.06291	0.06372	0.02989	0.03656	0.047	0.04287	0.03568	0.02191		0.0553	0.0632	0.0474	0.0389	0.0356	0.0443	0.0404	0.025		0.00761	0.00052	-0.01751	-0.00234	0.0114	-0.00143	-0.00472	-0.00309		5.79121e-05	2.704e-07	0.0003066	5.4756e-06	0.00012996	2.0449e-06	2.22784e-05	9.5481e-06
27	0.05966	0.06822	0.03214	0.03841	0.0413	0.04377	0.03543	0.02221		0.0548	0.0626	0.0471	0.039	0.0354	0.0443	0.0404	0.0205		0.00486	0.00562	-0.01496	-0.00059	0.0059	-0.00053	-0.00497	0.00171		2.36196e-05	3.15844e-05	0.000223802	3.481e-07	3.481e-05	2.809e-07	2.47009e-05	2.9241e-06
27.2	0.06446	0.06877	0.02984	0.03771	0.0394	0.04657	0.03998	0.02356		0.0548	0.0624	0.0473	0.0389	0.0354	0.0443	0.0404	0.0242		0.00966	0.00637	-0.01746	-0.00119	0.004	0.00227	-0.00042	-0.00064		9.33156e-05	4.05769e-05	0.000304852	1.4161e-06	1.6e-05	5.1529e-06	1.764e-07	4.096e-07
27.4	0.06561	0.06682	0.03174	0.03806	0.03765	0.04262	0.03428	0.02361		0.0547	0.0624	0.0475	0.0387	0.0355	0.0441	0.0401	0.0254		0.01091	0.00442	-0.01576	-0.00064	0.00215	-0.00148	-0.00582	-0.00179		0.000119028	1.95364e-05	0.000248378	4.096e-07	4.6225e-06	2.1904e-06	3.38724e-05	3.2041e-06
27.6	0.06211	0.07087	0.03374	0.03861	0.0442	0.04192	0.04008	0.02441		0.0545	0.0623	0.0471	0.0387	0.0354	0.044	0.04	0.0258		0.00761	0.00857	-0.01336	-9e-05	0.0088	-0.00208	8e-05	-0.00139		5.79121e-05	7.34449e-05	0.00017849	8.1e-09	7.744e-05	4.3264e-06	6.4e-09	1.9321e-06
27.8	0.06216	0.06657	0.02934	0.03636	0.0425	0.04047	0.03368	0.02471		0.0542	0.0621	0.0467	0.0386	0.0352	0.044	0.04	0.021		0.00796	0.00447	-0.01736	-0.00224	0.0073	-0.00353	-0.00632	0.00371		6.33616e-05	1.99809e-05	0.00030137	5.0176e-06	5.329e-05	1.24609e-05	3.99424e-05	1.37641e-05
28	0.06066	0.06622	0.03049	0.03886	0.04095	0.04487	0.03913	0.02276		0.0543	0.0617	0.0466	0.0385	0.0352	0.0439	0.04	0.0236		0.00636	0.00452	-0.01611	0.00036	0.00575	0.00097	-0.00087	-0.00084		4.04496e-05	2.04304e-05	0.000259532	1.296e-07	3.30625e-05	9.409e-07	7.569e-07	7.056e-07
28.2	0.06221	0.06537	0.03129	0.03481	0.03705	0.04502	0.03293	0.02611		0.054	0.0609	0.0466	0.0384	0.035	0.0439	0.04	0.0258		0.00821	0.00447	-0.01531	-0.00359	0.00205	0.00112	-0.00707	0.00031		6.74041e-05	1.99809e-05	0.000234396	1.28881e-05	4.2025e-06	1.2544e-06	4.99849e-05	9.61e-08
28.4	0.06071	0.06457	0.03234	0.03716	0.03525	0.04107	0.04073	0.02276		0.0539	0.0605	0.0464	0.0382	0.0349	0.0438	0.0397	0.0248		0.00681	0.00407	-0.01406	-0.00104	0.00035	-0.00273	0.00103	-0.00204		4.63761e-05	1.65649e-05	0.000197684	1.0816e-06	1.225e-07	7.4529e-06	1.0609e-06	4.1616e-06
28.6	0.06111	0.06277	0.03239	0.03946	0.0409	0.04297	0.03578	0.02521		0.0537	0.0602	0.0462	0.0382	0.0349	0.0436	0.0396	0.0206		0.00741	0.00257	-0.01381	0.00126	0.006	-0.00063	-0.00382	0.00461		5.49081e-05	6.6049e-06	0.000190716	1.5876e-06	3.6e-05	3.969e-07	1.45924e-05	2.12521e-05
28.8	0.06111	0.05982	0.02999	0.03326	0.0371	0.04502	0.03608	0.02321		0.0536	0.0603	0.0461	0.0381	0.0348	0.0434	0.0396	0.023		0.00751	-0.00048	-0.01611	-0.00484	0.0023	0.00162	-0.00352	0.00021		5.64001e-05	2.304e-07	0.000259532	2.34256e-05	5.29e-06	2.6244e-06	1.23904e-05	4.41e-08
29	0.06246	0.06117	0.02999	0.03876	0.03765	0.04407	0.03348	0.02311		0.0531	0.06	0.0458	0.038	0.0348	0.0432	0.0394	0.025		0.00936	0.00117	-0.01581	0.00076	0.00285	0.00087	-0.00592	-0.00189		8.76096e-05	1.3689e-06	0.000249956	5.776e-07	8.1225e-06	7.569e-07	3.50464e-05	3.5721e-06
29.2	0.05706	0.06727	0.03174	0.03406	0.0342	0.04207	0.03653	0.02496		0.0534	0.0602	0.046	0.0379	0.0346	0.0431	0.0393	0.0257		0.00366	0.00707	-0.01426	-0.00384	-0.0004	-0.00103	-0.00277	-0.00074		1.33956e-05	4.99849e-05	0.000203348	1.47456e-05	1.6e-07	1.0609e-06	7.6729e-06	5.476e-07
29.4	0.06121	0.06727	0.02949	0.03786	0.0358	0.04107	0.03613	0.02216		0.0534	0.0601	0.046	0.0377	0.0345	0.043	0.0394	0.0203		0.00781	0.00717	-0.01651	0.00016	0.0013	-0.00193	-0.00327	0.00186		6.09961e-05	5.14089e-05	0.00027258	2.56e-08	1.69e-06	3.7249e-06	1.06929e-05	3.4596e-06
29.6	0.05911	0.06512	0.03379	0.03436	0.0394	0.04022	0.03458	0.02436		0.0532	0.0599	0.0459	0.0378	0.0344	0.0431	0.0392	0.0216		0.00591	0.00522	-0.01211	-0.00344	0.005	-0.00288	-0.00462	0.00276		3.49281e-05	2.72484e-05	0.000146652	1.18336e-05	2.5e-05	8.2944e-06	2.13444e-05	7.6176e-06
29.8	0.06011	0.06682	0.03284	0.03486	0.0406	0.04437	0.03343	0.02131		0.053	0.0601	0.0457	0.0378	0.0343	0.043	0.0391	0.0245		0.00711	0.00672	-0.01286	-0.00294	0.0063	0.00137	-0.00567	-0.00319		5.05521e-05	4.51584e-05	0.00016538	8.6436e-06	3.969e-05	1.8769e-06	3.21489e-05	1.01761e-05
30	0.05966	0.07052	0.02889	0.03951	0.04505	0.04197	0.03393	0.02361		0.0528	0.0596	0.0455	0.0378	0.0344	0.043	0.0389	0.0254		0.00686	0.01092	-0.01661	0.00171	0.01065	-0.00103	-0.00497	-0.00179		4.70596e-05	0.000119246	0.000275892	2.9241e-06	0.000113422	1.0609e-06	2.47009e-05	3.2041e-06
30.2	0.06161	0.07612	0.02794	0.03181	0.04165	0.03877	0.03548	0.02586		0.0525	0.0592	0.0454	0.0376	0.0344	0.043	0.0389	0.0213		0.00911	0.01692	-0.01746	-0.00579	0.00725	-0.00423	-0.00342	0.00456		8.29921e-05	0.000286286	0.000304852	3.35241e-05	5.25625e-05	1.78929e-05	1.16964e-05	2.07936e-05
30.4	0.06101	0.06772	0.03264	0.03846	0.03925	0.04107	0.03428	0.02436		0.0522	0.0591	0.0453	0.0374	0.0342	0.043	0.0388	0.0222		0.00881	0.00862	-0.01266	0.00106	0.00505	-0.00193	-0.00452	0.00216		7.76161e-05	7.43044e-05	0.000160276	1.1236e-06	2.55025e-05	3.7249e-06	2.04304e-05	4.6656e-06
30.6	0.05826	0.07232	0.03029	0.03391	0.041	0.04182	0.04083	0.02356		0.0521	0.0587	0.0451	0.0373	0.0341	0.0429	0.0388	0.0248		0.00616	0.01362	-0.01481	-0.00339	0.0069	-0.00108	0.00203	-0.00124		3.79456e-05	0.000185504	0.000219336	1.14921e-05	4.761e-05	1.1664e-06	4.1209e-06	1.5376e-06
30.8	0.06001	0.07132	0.03089	0.03396	0.03875	0.04072	0.02983	0.02346		0.0519	0.0583	0.0447	0.0372	0.0339	0.0426	0.0388	0.0245		0.00811	0.01302	-0.01381	-0.00324	0.00485	-0.00188	-0.00897	-0.00104		6.57721e-05	0.00016952	0.000190716	1.04976e-05	2.35225e-05	3.5344e-06	8.04609e-05	1.0816e-06
31	0.05866	0.07052	0.02904	0.03381	0.03685	0.04342	0.03828	0.02376		0.052	0.0582	0.0445	0.037	0.0338	0.0424	0.0385	0.02		0.00666	0.01232	-0.01546	-0.00319	0.00305	0.00102	-0.00022	0.00376		4.43556e-05	0.000151782	0.000239012	1.01761e-05	9.3025e-06	1.0404e-06	4.84e-08	1.41376e-05
31.2	0.05781	0.07362	0.02839	0.03061	0.0382	0.04752	0.02913	0.02351		0.0521	0.0583	0.0445	0.0369	0.0338	0.0422	0.0384	0.0224		0.00571	0.01532	-0.01611	-0.00629	0.0044	0.00532	-0.00927	0.00111		3.26041e-05	0.000234702	0.000259532	3.95641e-05	1.936e-05	2.83024e-05	8.59329e-05	1.2321e-06
31.4	0.05936	0.07617	0.02894	0.03806	0.0407	0.04087	0.03713	0.02391		0.052	0.0578	0.0444	0.0368	0.0336	0.0422	0.0383	0.0241		0.00736	0.01837	-0.01546	0.00126	0.0071	-0.00133	-0.00117	-0.00019		5.41696e-05	0.000337457	0.000239012	1.5876e-06	5.041e-05	1.7689e-06	1.3689e-06	3.61e-08
31.6	0.05861	0.06992	0.02784	0.03126	0.04035	0.03712	0.03233	0.02171		0.0521	0.058	0.0443	0.0368	0.0336	0.0421	0.0383	0.025		0.00651	0.01192	-0.01646	-0.00554	0.00675	-0.00498	-0.00597	-0.00329		4.23801e-05	0.000142086	0.000270932	3.06916e-05	4.55625e-05	2.48004e-05	3.56409e-05	1.08241e-05
31.8	0.05646	0.07137	0.02949	0.03446	0.04045	0.03722	0.02918	0.02281		0.0516	0.0576	0.0442	0.0369	0.0335	0.042	0.0383	0.0217		0.00486	0.01377	-0.01471	-0.00244	0.00695	-0.00478	-0.00912	0.00111		2.36196e-05	0.000189613	0.000216384	5.9536e-06	4.83025e-05	2.28484e-05	8.31744e-05	1.2321e-06
32	0.05936	0.07292	0.02984	0.03631	0.03635	0.04052	0.03813	0.02256		0.0517	0.0577	0.0443	0.0369	0.0337	0.0419	0.0382	0.0214		0.00766	0.01522	-0.01446	-0.00059	0.00265	-0.00138	-7e-05	0.00116		5.86756e-05	0.000231648	0.000209092	3.481e-07	7.0225e-06	1.9044e-06	4.9e-09	1.3456e-06
32.2	0.05726	0.06657	0.02979	0.03276	0.03975	0.04292	0.03138	0.02606		0.0513	0.0574	0.0438	0.0367	0.0336	0.0418	0.0379	0.0243		0.00596	0.00917	-0.01401	-0.00394	0.00615	0.00112	-0.00652	0.00176		3.55216e-05	8.40889e-05	0.00019628	1.55236e-05	3.78225e-05	1.2544e-06	4.25104e-05	3.0976e-06
32.4	0.05766	0.06392	0.02984	0.03556	0.0365	0.04242	0.03693	0.02411		0.0509	0.0569	0.0435	0.0367	0.0335	0.0419	0.0378	0.0251		0.00676	0.00702	-0.01366	-0.00114	0.003	0.00052	-0.00087	-0.00099		4.56976e-05	4.92804e-05	0.000186596	1.2996e-06	9e-06	2.704e-07	7.569e-07	9.801e-07
32.6	0.05781	0.06422	0.03064	0.03301	0.039	0.03887	0.03263	0.02371		0.0509	0.0565	0.0435	0.0364	0.0334	0.0417	0.0379	0.0218		0.00691	0.00772	-0.01286	-0.00339	0.0056	-0.00283	-0.00527	0.00191		4.77481e-05	5.95984e-05	0.00016538	1.14921e-05	3.136e-05	8.0089e-06	2.77729e-05	3.6481e-06
32.8	0.05606	0.06102	0.03024	0.03281	0.0426	0.03952	0.03323	0.02281		0.0504	0.0562	0.0433	0.0363	0.0333	0.0416	0.0378	0.0211		0.00566	0.00482	-0.01306	-0.00349	0.0093	-0.00208	-0.00457	0.00171		3.20356e-05	2.32324e-05	0.000170564	1.21801e-05	8.649e-05	4.3264e-06	2.08849e-05	2.9241e-06
33	0.05911	0.05952	0.03084	0.03396	0.0392	0.03977	0.03233	0.02136		0.0501	0.0562	0.043	0.0362	0.0331	0.0415	0.0377	0.0238		0.00901	0.00332	-0.01216	-0.00224	0.0061	-0.00173	-0.00537	-0.00244		8.11801e-05	1.10224e-05	0.000147866	5.0176e-06	3.721e-05	2.9929e-06	2.88369e-05	5.9536e-06
33.2	0.05706	0.05987	0.02869	0.03316	0.0393	0.04342	0.03408	0.02596		0.05	0.0564	0.0429	0.036	0.033	0.0411	0.0374	0.0253		0.00706	0.00347	-0.01421	-0.00284	0.0063	0.00232	-0.00332	0.00066		4.98436e-05	1.20409e-05	0.000201924	8.0656e-06	3.969e-05	5.3824e-06	1.10224e-05	4.356e-07
33.4	0.05566	0.05787	0.02819	0.03431	0.0389	0.03677	0.03443	0.02316		0.0499	0.0558	0.0428	0.0358	0.033	0.0409	0.0373	0.0232		0.00576	0.00207	-0.01461	-0.00149	0.0059	-0.00413	-0.00287	-4e-05		3.31776e-05	4.2849e-06	0.000213452	2.2201e-06	3.481e-05	1.70569e-05	8.2369e-06	1.6e-09
33.6	0.05606	0.05802	0.02864	0.02896	0.0377	0.04067	0.03203	0.02311		0.0499	0.0557	0.0427	0.0358	0.0327	0.0408	0.0371	0.0212		0.00616	0.00232	-0.01406	-0.00684	0.005	-0.00013	-0.00507	0.00191		3.79456e-05	5.3824e-06	0.000197684	4.67856e-05	2.5e-05	1.69e-08	2.57049e-05	3.6481e-06
33.8	0.05616	0.05917	0.02969	0.03311	0.0391	0.03682	0.03008	0.02276		0.0494	0.0554	0.0423	0.0358	0.0327	0.0407	0.037	0.0235		0.00676	0.00377	-0.01261	-0.00269	0.0064	-0.00388	-0.00692	-0.00074		4.56976e-05	1.42129e-05	0.000159012	7.2361e-06	4.096e-05	1.50544e-05	4.78864e-05	5.476e-07
34	0.05671	0.06047	0.03054	0.03286	0.0429	0.03922	0.03838	0.02316		0.0492	0.0553	0.0424	0.0357	0.0326	0.0406	0.0371	0.025		0.00751	0.00517	-0.01186	-0.00284	0.0103	-0.00138	0.00128	-0.00184		5.64001e-05	2.67289e-05	0.00014066	8.0656e-06	0.00010609	1.9044e-06	1.6384e-06	3.3856e-06
34.2	0.05486	0.05972	0.02864	0.03146	0.0395	0.03892	0.02863	0.02171		0.0491	0.0547	0.0423	0.0356	0.0326	0.0405	0.037	0.0223		0.00576	0.00502	-0.01366	-0.00414	0.0069	-0.00158	-0.00837	-0.00059		3.31776e-05	2.52004e-05	0.000186596	1.71396e-05	4.761e-05	2.4964e-06	7.00569e-05	3.481e-07
34.4	0.05591	0.05852	0.02769	0.03331	0.0366	0.03942	0.03468	0.02446		0.049	0.0547	0.042	0.0355	0.0325	0.0405	0.0368	0.0206		0.00691	0.00382	-0.01431	-0.00219	0.0041	-0.00108	-0.00212	0.00386		4.77481e-05	1.45924e-05	0.000204776	4.7961e-06	1.681e-05	1.1664e-06	4.4944e-06	1.48996e-05
34.6	0.05341	0.05747	0.02889	0.03051	0.03725	0.04417	0.03183	0.02241		0.0485	0.0542	0.0417	0.0354	0.0324	0.0404	0.0367	0.0232		0.00491	0.00327	-0.01281	-0.00489	0.00485	0.00377	-0.00487	-0.00079		2.41081e-05	1.06929e-05	0.000164096	2.39121e-05	2.35225e-05	1.42129e-05	2.37169e-05	6.241e-07
34.8	0.05356	0.05652	0.02864	0.03361	0.0397	0.03727	0.03123	0.02036		0.0483	0.0544	0.0416	0.0352	0.0323	0.0403	0.0367	0.0244		0.00526	0.00212	-0.01296	-0.00159	0.0074	-0.00303	-0.00547	-0.00404		2.76676e-05	4.4944e-06	0.000167962	2.5281e-06	5.476e-05	9.1809e-06	2.99209e-05	1.63216e-05
35	0.05476	0.05482	0.02704	0.02651	0.04025	0.03922	0.03588	0.02171		0.0483	0.0537	0.0414	0.035	0.0321	0.04	0.0365	0.022		0.00646	0.00112	-0.01436	-0.00849	0.00815	-0.00078	-0.00062	-0.00029		4.17316e-05	1.2544e-06	0.00020621	7.20801e-05	6.64225e-05	6.084e-07	3.844e-07	8.41e-08
35.2	0.05366	0.05547	0.02954	0.03546	0.0382	0.03662	0.02703	0.02286		0.0481	0.0539	0.0414	0.035	0.032	0.0398	0.0363	0.0199		0.00556	0.00157	-0.01186	0.00046	0.0062	-0.00318	-0.00927	0.00296		3.09136e-05	2.4649e-06	0.00014066	2.116e-07	3.844e-05	1.01124e-05	8.59329e-05	8.7616e-06
35.4	0.05456	0.05482	0.03084	0.03031	0.04155	0.03972	0.03533	0.02326		0.048	0.0539	0.0413	0.0348	0.0319	0.0396	0.0361	0.0228		0.00656	0.00092	-0.01046	-0.00449	0.00965	0.00012	-0.00077	0.00046		4.30336e-05	8.464e-07	0.000109412	2.01601e-05	9.31225e-05	1.44e-08	5.929e-07	2.116e-07
35.6	0.05421	0.05647	0.03009	0.03031	0.03455	0.03802	0.03248	0.02221		0.0478	0.0535	0.041	0.0348	0.0318	0.0396	0.0361	0.0243		0.00641	0.00297	-0.01091	-0.00449	0.00275	-0.00158	-0.00362	-0.00209		4.10881e-05	8.8209e-06	0.000119028	2.01601e-05	7.5625e-06	2.4964e-06	1.31044e-05	4.3681e-06
35.8	0.05401	0.05667	0.02969	0.03036	0.0313	0.04117	0.03283	0.01891		0.0475	0.0529	0.0409	0.0348	0.0316	0.0395	0.036	0.0219		0.00651	0.00377	-0.01121	-0.00444	-0.0003	0.00167	-0.00317	-0.00299		4.23801e-05	1.42129e-05	0.000125664	1.97136e-05	9e-08	2.7889e-06	1.00489e-05	8.9401e-06
36	0.05351	0.05817	0.02669	0.02736	0.0355	0.04097	0.03093	0.02306		0.0475	0.0528	0.0409	0.0346	0.0316	0.0395	0.036	0.0195		0.00601	0.00537	-0.01421	-0.00724	0.0039	0.00147	-0.00507	0.00356		3.61201e-05	2.88369e-05	0.000201924	5.24176e-05	1.521e-05	2.1609e-06	2.57049e-05	1.26736e-05
36.2	0.05301	0.05837	0.02724	0.03006	0.0365	0.03422	0.03173	0.02161		0.0468	0.0521	0.0405	0.0345	0.0315	0.0394	0.0358	0.0226		0.00621	0.00627	-0.01326	-0.00444	0.005	-0.00518	-0.00407	-0.00099		3.85641e-05	3.93129e-05	0.000175828	1.97136e-05	2.5e-05	2.68324e-05	1.65649e-05	9.801e-07
36.4	0.05176	0.05667	0.02779	0.03121	0.03755	0.03602	0.03103	0.02226		0.0467	0.0516	0.0403	0.0343	0.0313	0.0393	0.0357	0.0236		0.00506	0.00507	-0.01251	-0.00309	0.00625	-0.00328	-0.00467	-0.00134		2.56036e-05	2.57049e-05	0.0001565	9.5481e-06	3.90625e-05	1.07584e-05	2.18089e-05	1.7956e-06
36.6	0.05281	0.05737	0.02914	0.03061	0.03965	0.03572	0.03368	0.02046		0.0461	0.0512	0.04	0.0342	0.0312	0.039	0.0356	0.02		0.00671	0.00617	-0.01086	-0.00359	0.00845	-0.00328	-0.00192	0.00046		4.50241e-05	3.80689e-05	0.00011794	1.28881e-05	7.14025e-05	1.07584e-05	3.6864e-06	2.116e-07
36.8	0.05096	0.05397	0.02829	0.02821	0.0418	0.03792	0.02778	0.02231		0.0458	0.0509	0.0397	0.034	0.0311	0.0388	0.0355	0.0197		0.00516	0.00307	-0.01141	-0.00579	0.0107	-0.00088	-0.00772	0.00261		2.66256e-05	9.4249e-06	0.000130188	3.35241e-05	0.00011449	7.744e-07	5.95984e-05	6.8121e-06
37	0.05161	0.05692	0.03119	0.03001	0.04035	0.03852	0.03528	0.02341		0.0453	0.0506	0.0395	0.0338	0.0309	0.0386	0.0353	0.0224		0.00631	0.00632	-0.00831	-0.00379	0.00945	-8e-05	-2e-05	0.00101		3.98161e-05	3.99424e-05	6.90561e-05	1.43641e-05	8.93025e-05	6.4e-09	4e-10	1.0201e-06
37.2	0.05136	0.05562	0.02674	0.02946	0.03655	0.03967	0.02833	0.02151		0.045	0.0502	0.0393	0.0335	0.0307	0.0383	0.0351	0.0234		0.00636	0.00542	-0.01256	-0.00404	0.00585	0.00137	-0.00677	-0.00189		4.04496e-05	2.93764e-05	0.000157754	1.63216e-05	3.42225e-05	1.8769e-06	4.58329e-05	3.5721e-06
37.4	0.05211	0.05352	0.02724	0.02906	0.03165	0.04022	0.03183	0.02061		0.0449	0.05	0.0392	0.0333	0.0304	0.0381	0.0348	0.022		0.00721	0.00352	-0.01196	-0.00424	0.00125	0.00212	-0.00297	-0.00139		5.19841e-05	1.23904e-05	0.000143042	1.79776e-05	1.5625e-06	4.4944e-06	8.8209e-06	1.9321e-06
37.6	0.04886	0.05427	0.02629	0.02926	0.0303	0.03622	0.02833	0.02031		0.0446	0.0498	0.039	0.0331	0.0302	0.0379	0.0346	0.0209		0.00426	0.00447	-0.01271	-0.00384	0.0001	-0.00168	-0.00627	-0.00059		1.81476e-05	1.99809e-05	0.000161544	1.47456e-05	1e-08	2.8224e-06	3.93129e-05	3.481e-07
37.8	0.04936	0.05792	0.02549	0.02761	0.03255	0.04397	0.03038	0.02161		0.0443	0.0496	0.0386	0.033	0.03	0.0378	0.0344	0.021		0.00506	0.00832	-0.01311	-0.00539	0.00255	0.00617	-0.00402	0.00061		2.56036e-05	6.92224e-05	0.000171872	2.90521e-05	6.5025e-06	3.80689e-05	1.61604e-05	3.721e-07
38	0.05146	0.05577	0.02839	0.03071	0.0358	0.03782	0.03033	0.01976		0.0441	0.0495	0.0385	0.0328	0.0298	0.0377	0.0343	0.0224		0.00736	0.00627	-0.01011	-0.00209	0.006	0.00012	-0.00397	-0.00264		5.41696e-05	3.93129e-05	0.000102212	4.3681e-06	3.6e-05	1.44e-08	1.57609e-05	6.9696e-06
38.2	0.05051	0.05482	0.02594	0.02916	0.0417	0.03412	0.02743	0.02036		0.0441	0.0492	0.0385	0.0327	0.0297	0.0374	0.0342	0.0231		0.00641	0.00562	-0.01256	-0.00354	0.012	-0.00328	-0.00677	-0.00274		4.10881e-05	3.15844e-05	0.000157754	1.25316e-05	0.000144	1.07584e-05	4.58329e-05	7.5076e-06
38.4	0.04991	0.05397	0.02804	0.03106	0.04155	0.03232	0.03133	0.02236		0.044	0.0488	0.0384	0.0325	0.0295	0.0373	0.034	0.022		0.00591	0.00517	-0.01036	-0.00144	0.01205	-0.00498	-0.00267	0.00036		3.49281e-05	2.67289e-05	0.00010733	2.0736e-06	0.000145202	2.48004e-05	7.1289e-06	1.296e-07
38.6	0.05086	0.05632	0.02604	0.02721	0.0383	0.03342	0.03173	0.02486		0.0435	0.049	0.0382	0.0324	0.0293	0.0372	0.0338	0.02		0.00736	0.00732	-0.01216	-0.00519	0.009	-0.00378	-0.00207	0.00486		5.41696e-05	5.35824e-05	0.000147866	2.69361e-05	8.1e-05	1.42884e-05	4.2849e-06	2.36196e-05
38.8	0.04966	0.05182	0.02634	0.03246	0.03655	0.03627	0.02848	0.02376		0.0432	0.0488	0.0379	0.0323	0.0292	0.0371	0.0337	0.0216		0.00646	0.00302	-0.01156	0.00016	0.00735	-0.00083	-0.00522	0.00216		4.17316e-05	9.1204e-06	0.000133634	2.56e-08	5.40225e-05	6.889e-07	2.72484e-05	4.6656e-06
39	0.04826	0.05702	0.02679	0.02681	0.0349	0.03582	0.02863	0.02281		0.0433	0.0487	0.0378	0.032	0.0291	0.0369	0.0335	0.0224		0.00496	0.00832	-0.01101	-0.00519	0.0058	-0.00108	-0.00487	0.00041		2.46016e-05	6.92224e-05	0.00012122	2.69361e-05	3.364e-05	1.1664e-06	2.37169e-05	1.681e-07
39.2	0.05046	0.05842	0.02584	0.02666	0.03575	0.03737	0.03263	0.02151		0.0433	0.0483	0.0376	0.0319	0.029	0.0368	0.0334	0.0223		0.00716	0.01012	-0.01176	-0.00524	0.00675	0.00057	-0.00077	-0.00079		5.12656e-05	0.000102414	0.000138298	2.74576e-05	4.55625e-05	3.249e-07	5.929e-07	6.241e-07
39.4	0.05321	0.05922	0.02664	0.02796	0.0401	0.03537	0.02783	0.02031		0.0432	0.0478	0.0373	0.0318	0.0288	0.0367	0.0333	0.0187		0.01001	0.01142	-0.01066	-0.00384	0.0113	-0.00133	-0.00547	0.00161		0.0001002	0.000130416	0.000113636	1.47456e-05	0.00012769	1.7689e-06	2.99209e-05	2.5921e-06
39.6	0.04871	0.06377	0.02514	0.02551	0.03565	0.03582	0.02938	0.02126		0.043	0.0472	0.0372	0.0316	0.0286	0.0366	0.0331	0.0205		0.00571	0.01657	-0.01206	-0.00609	0.00705	-0.00078	-0.00372	0.00076		3.26041e-05	0.000274565	0.000145444	3.70881e-05	4.97025e-05	6.084e-07	1.38384e-05	5.776e-07
39.8	0.04911	0.05957	0.02679	0.03236	0.037	0.03377	0.02788	0.02091		0.0425	0.0474	0.0371	0.0315	0.0285	0.0364	0.0331	0.0218		0.00661	0.01217	-0.01031	0.00086	0.0085	-0.00263	-0.00522	-0.00089		4.36921e-05	0.000148109	0.000106296	7.396e-07	7.225e-05	6.9169e-06	2.72484e-05	7.921e-07
40	0.05041	0.05472	0.02634	0.02646	0.0366	0.03282	0.02713	0.01926		0.0425	0.0472	0.037	0.0313	0.0285	0.0362	0.0329	0.0229		0.00791	0.00752	-0.01066	-0.00484	0.0081	-0.00338	-0.00577	-0.00364		6.25681e-05	5.65504e-05	0.000113636	2.34256e-05	6.561e-05	1.14244e-05	3.32929e-05	1.32496e-05
40.2	0.04881	0.05652	0.02629	0.02731	0.0347	0.04232	0.02643	0.02076		0.0426	0.0471	0.0369	0.0312	0.0284	0.036	0.0328	0.0216		0.00621	0.00942	-0.01061	-0.00389	0.0063	0.00632	-0.00637	-0.00084		3.85641e-05	8.87364e-05	0.000112572	1.51321e-05	3.969e-05	3.99424e-05	4.05769e-05	7.056e-07
40.4	0.04841	0.05487	0.02774	0.02831	0.03295	0.03822	0.02903	0.02131		0.0425	0.0475	0.0366	0.0311	0.0283	0.0358	0.0326	0.0192		0.00591	0.00737	-0.00886	-0.00279	0.00465	0.00242	-0.00357	0.00211		3.49281e-05	5.43169e-05	7.84996e-05	7.7841e-06	2.16225e-05	5.8564e-06	1.27449e-05	4.4521e-06
40.6	0.04766	0.05667	0.02789	0.02756	0.0367	0.03607	0.02778	0.02241		0.0424	0.047	0.0364	0.0311	0.0282	0.0358	0.0325	0.0205		0.00526	0.00967	-0.00851	-0.00354	0.0085	0.00027	-0.00472	0.00191		2.76676e-05	9.35089e-05	7.24201e-05	1.25316e-05	7.225e-05	7.29e-08	2.22784e-05	3.6481e-06
40.8	0.04721	0.06067	0.02794	0.03046	0.0309	0.03502	0.02973	0.02001		0.0423	0.0467	0.0364	0.031	0.028	0.0356	0.0324	0.0217		0.00491	0.01397	-0.00846	-0.00054	0.0029	-0.00058	-0.00267	-0.00169		2.41081e-05	0.000195161	7.15716e-05	2.916e-07	8.41e-06	3.364e-07	7.1289e-06	2.8561e-06
41	0.04751	0.05772	0.02654	0.02591	0.03615	0.03672	0.02633	0.02281		0.0423	0.0463	0.0365	0.0309	0.028	0.0356	0.0323	0.0228		0.00521	0.01142	-0.00996	-0.00499	0.00815	0.00112	-0.00597	1e-05		2.71441e-05	0.000130416	9.92016e-05	2.49001e-05	6.64225e-05	1.2544e-06	3.56409e-05	1e-10
41.2	0.04621	0.05632	0.02804	0.03086	0.0345	0.03347	0.02623	0.02276		0.042	0.046	0.0363	0.0309	0.028	0.0356	0.0322	0.0215		0.00421	0.01032	-0.00826	-4e-05	0.0065	-0.00213	-0.00597	0.00126		1.77241e-05	0.000106502	6.82276e-05	1.6e-09	4.225e-05	4.5369e-06	3.56409e-05	1.5876e-06
41.4	0.04901	0.05722	0.02584	0.02681	0.03525	0.03517	0.03278	0.02186		0.0416	0.0454	0.036	0.0308	0.028	0.0355	0.0321	0.0196		0.00741	0.01182	-0.01016	-0.00399	0.00725	-0.00033	0.00068	0.00226		5.49081e-05	0.000139712	0.000103226	1.59201e-05	5.25625e-05	1.089e-07	4.624e-07	5.1076e-06
41.6	0.04616	0.05732	0.03019	0.02941	0.037	0.03737	0.02398	0.01911		0.0412	0.0449	0.0358	0.0307	0.0279	0.0354	0.0321	0.0201		0.00496	0.01242	-0.00561	-0.00129	0.0091	0.00197	-0.00812	-0.00099		2.46016e-05	0.000154256	3.14721e-05	1.6641e-06	8.281e-05	3.8809e-06	6.59344e-05	9.801e-07
41.8	0.04751	0.05757	0.02759	0.02486	0.0409	0.03592	0.03008	0.02216		0.0408	0.0445	0.0355	0.0305	0.0278	0.0351	0.032	0.0211		0.00671	0.01307	-0.00791	-0.00564	0.0131	0.00082	-0.00192	0.00106		4.50241e-05	0.000170825	6.25681e-05	3.18096e-05	0.00017161	6.724e-07	3.6864e-06	1.1236e-06
42	0.04651	0.05722	0.02664	0.02466	0.0368	0.03602	0.02663	0.02251		0.0403	0.0444	0.0352	0.0303	0.0277	0.035	0.0319	0.0223		0.00621	0.01282	-0.00856	-0.00564	0.0091	0.00102	-0.00527	0.00021		3.85641e-05	0.000164352	7.32736e-05	3.18096e-05	8.281e-05	1.0404e-06	2.77729e-05	4.41e-08
42.2	0.04701	0.05592	0.02599	0.02581	0.0363	0.03312	0.03088	0.02486		0.0398	0.0443	0.035	0.0301	0.0274	0.0348	0.0317	0.0203		0.00721	0.01162	-0.00901	-0.00429	0.0089	-0.00168	-0.00082	0.00456		5.19841e-05	0.000135024	8.11801e-05	1.84041e-05	7.921e-05	2.8224e-06	6.724e-07	2.07936e-05
42.4	0.04481	0.05592	0.02489	0.02851	0.03995	0.03222	0.02598	0.02061		0.0397	0.0444	0.0349	0.0298	0.0273	0.0344	0.0315	0.0187		0.00511	0.01152	-0.01001	-0.00129	0.01265	-0.00218	-0.00552	0.00191		2.61121e-05	0.00013271	0.0001002	1.6641e-06	0.000160022	4.7524e-06	3.04704e-05	3.6481e-06
42.6	0.04421	0.05387	0.02749	0.02531	0.0327	0.03582	0.02778	0.02011		0.0396	0.0445	0.0348	0.0297	0.0271	0.0342	0.0312	0.0204		0.00461	0.00937	-0.00731	-0.00439	0.0056	0.00162	-0.00342	-0.00029		2.12521e-05	8.77969e-05	5.34361e-05	1.92721e-05	3.136e-05	2.6244e-06	1.16964e-05	8.41e-08
42.8	0.04621	0.05542	0.02629	0.02531	0.03665	0.03572	0.02648	0.01981		0.0397	0.0441	0.0348	0.0296	0.0269	0.0341	0.031	0.0207		0.00651	0.01132	-0.00851	-0.00429	0.00975	0.00162	-0.00452	-0.00089		4.23801e-05	0.000128142	7.24201e-05	1.84041e-05	9.50625e-05	2.6244e-06	2.04304e-05	7.921e-07
43	0.04456	0.05572	0.02804	0.02791	0.0339	0.03392	0.02718	0.01891		0.0397	0.0438	0.0347	0.0295	0.0267	0.034	0.0308	0.022		0.00486	0.01192	-0.00666	-0.00159	0.0072	-8e-05	-0.00362	-0.00309		2.36196e-05	0.000142086	4.43556e-05	2.5281e-06	5.184e-05	6.4e-09	1.31044e-05	9.5481e-06
43.2	0.04536	0.05662	0.02909	0.02731	0.034	0.03707	0.02763	0.02031		0.0397	0.0433	0.0346	0.0295	0.0266	0.034	0.0307	0.0205		0.00566	0.01332	-0.00551	-0.00219	0.0074	0.00307	-0.00307	-0.00019		3.20356e-05	0.000177422	3.03601e-05	4.7961e-06	5.476e-05	9.4249e-06	9.4249e-06	3.61e-08
43.4	0.04536	0.05717	0.02584	0.02271	0.03775	0.03212	0.02333	0.01926		0.0391	0.0427	0.0344	0.0294	0.0265	0.034	0.0307	0.0187		0.00626	0.01447	-0.00856	-0.00669	0.01125	-0.00188	-0.00737	0.00056		3.91876e-05	0.000209381	7.32736e-05	4.47561e-05	0.000126562	3.5344e-06	5.43169e-05	3.136e-07
43.6	0.04526	0.05107	0.02519	0.02486	0.03545	0.03772	0.02873	0.02021		0.0386	0.042	0.0342	0.0293	0.0265	0.0339	0.0307	0.0199		0.00666	0.00907	-0.00901	-0.00444	0.00895	0.00382	-0.00197	0.00031		4.43556e-05	8.22649e-05	8.11801e-05	1.97136e-05	8.01025e-05	1.45924e-05	3.8809e-06	9.61e-08
43.8	0.04491	0.05017	0.02444	0.02501	0.03235	0.03412	0.02478	0.02171		0.0382	0.0417	0.034	0.0291	0.0264	0.0338	0.0306	0.0203		0.00671	0.00847	-0.00956	-0.00409	0.00595	0.00032	-0.00582	0.00141		4.50241e-05	7.17409e-05	9.13936e-05	1.67281e-05	3.54025e-05	1.024e-07	3.38724e-05	1.9881e-06
44	0.04366	0.05042	0.02784	0.02721	0.03295	0.03297	0.02868	0.02026		0.0375	0.0411	0.0336	0.0289	0.0263	0.0335	0.0305	0.0212		0.00616	0.00932	-0.00576	-0.00169	0.00665	-0.00053	-0.00182	-0.00094		3.79456e-05	8.68624e-05	3.31776e-05	2.8561e-06	4.42225e-05	2.809e-07	3.3124e-06	8.836e-07
44.2	0.04346	0.05117	0.02584	0.02486	0.02755	0.03732	0.02468	0.01836		0.0371	0.0405	0.0332	0.0287	0.0261	0.0332	0.0303	0.0195		0.00636	0.01067	-0.00736	-0.00384	0.00145	0.00412	-0.00562	-0.00114		4.04496e-05	0.000113849	5.41696e-05	1.47456e-05	2.1025e-06	1.69744e-05	3.15844e-05	1.2996e-06
44.4	0.04191	0.04917	0.02734	0.02271	0.03405	0.03962	0.02978	0.02006		0.0367	0.0405	0.0329	0.0284	0.0259	0.0329	0.0301	0.0183		0.00521	0.00867	-0.00556	-0.00569	0.00815	0.00672	-0.00032	0.00176		2.71441e-05	7.51689e-05	3.09136e-05	3.23761e-05	6.64225e-05	4.51584e-05	1.024e-07	3.0976e-06
44.6	0.04236	0.05162	0.02814	0.02316	0.0322	0.03412	0.02638	0.01831		0.0363	0.0402	0.0326	0.0281	0.0257	0.0326	0.0299	0.0197		0.00606	0.01142	-0.00446	-0.00494	0.0065	0.00152	-0.00352	-0.00139		3.67236e-05	0.000130416	1.98916e-05	2.44036e-05	4.225e-05	2.3104e-06	1.23904e-05	1.9321e-06
44.8	0.04181	0.05282	0.02499	0.02526	0.02795	0.03042	0.02383	0.02191		0.0363	0.0402	0.0326	0.0279	0.0254	0.0324	0.0296	0.0201		0.00551	0.01262	-0.00761	-0.00264	0.00255	-0.00198	-0.00577	0.00181		3.03601e-05	0.000159264	5.79121e-05	6.9696e-06	6.5025e-06	3.9204e-06	3.32929e-05	3.2761e-06
45	0.04161	0.05257	0.02919	0.02811	0.02945	0.02867	0.02663	0.02076		0.0364	0.0399	0.0325	0.0277	0.0251	0.0322	0.0293	0.0208		0.00521	0.01267	-0.00331	0.00041	0.00435	-0.00353	-0.00267	-4e-05		2.71441e-05	0.000160529	1.09561e-05	1.681e-07	1.89225e-05	1.24609e-05	7.1289e-06	1.6e-09
45.2	0.04136	0.05282	0.02564	0.02381	0.0282	0.03562	0.02343	0.01986		0.0364	0.0395	0.0324	0.0276	0.0249	0.032	0.0291	0.0198		0.00496	0.01332	-0.00676	-0.00379	0.0033	0.00362	-0.00567	6e-05		2.46016e-05	0.000177422	4.56976e-05	1.43641e-05	1.089e-05	1.31044e-05	3.21489e-05	3.6e-09
45.4	0.04201	0.04907	0.02679	0.02286	0.03055	0.04152	0.02708	0.01881		0.0362	0.0392	0.0323	0.0276	0.0247	0.0319	0.0289	0.0179		0.00581	0.00987	-0.00551	-0.00474	0.00585	0.00962	-0.00182	0.00091		3.37561e-05	9.74169e-05	3.03601e-05	2.24676e-05	3.42225e-05	9.25444e-05	3.3124e-06	8.281e-07
45.6	0.04096	0.04657	0.02409	0.02346	0.0317	0.03157	0.02508	0.01861		0.0358	0.0392	0.0321	0.0275	0.0246	0.0319	0.0288	0.0191		0.00516	0.00737	-0.00801	-0.00404	0.0071	-0.00033	-0.00372	-0.00049		2.66256e-05	5.43169e-05	6.41601e-05	1.63216e-05	5.041e-05	1.089e-07	1.38384e-05	2.401e-07
45.8	0.04031	0.04622	0.02449	0.02336	0.0264	0.03337	0.02783	0.02041		0.0355	0.039	0.032	0.0274	0.0246	0.0317	0.0287	0.0196		0.00481	0.00722	-0.00751	-0.00404	0.0018	0.00167	-0.00087	0.00081		2.31361e-05	5.21284e-05	5.64001e-05	1.63216e-05	3.24e-06	2.7889e-06	7.569e-07	6.561e-07
46	0.04161	0.04652	0.02734	0.02401	0.0329	0.03302	0.02508	0.01961		0.0353	0.0389	0.032	0.0272	0.0245	0.0316	0.0286	0.0192		0.00631	0.00762	-0.00466	-0.00319	0.0084	0.00142	-0.00352	0.00041		3.98161e-05	5.80644e-05	2.17156e-05	1.01761e-05	7.056e-05	2.0164e-06	1.23904e-05	1.681e-07
46.2	0.03976	0.04447	0.02319	0.02661	0.02725	0.03247	0.02528	0.02046		0.0349	0.0388	0.0317	0.027	0.0244	0.0314	0.0285	0.0193		0.00486	0.00567	-0.00851	-0.00039	0.00285	0.00107	-0.00322	0.00116		2.36196e-05	3.21489e-05	7.24201e-05	1.521e-07	8.1225e-06	1.1449e-06	1.03684e-05	1.3456e-06
46.4	0.04046	0.04407	0.02594	0.02486	0.02425	0.03172	0.02133	0.01751		0.0346	0.0388	0.0313	0.0268	0.0242	0.0312	0.0283	0.0202		0.00586	0.00527	-0.00536	-0.00194	5e-05	0.00052	-0.00697	-0.00269		3.43396e-05	2.77729e-05	2.87296e-05	3.7636e-06	2.5e-09	2.704e-07	4.85809e-05	7.2361e-06
46.6	0.04031	0.04572	0.02469	0.02251	0.02345	0.02942	0.02243	0.01851		0.0344	0.0389	0.031	0.0266	0.024	0.0311	0.0282	0.0196		0.00591	0.00682	-0.00631	-0.00409	-0.00055	-0.00168	-0.00577	-0.00109		3.49281e-05	4.65124e-05	3.98161e-05	1.67281e-05	3.025e-07	2.8224e-06	3.32929e-05	1.1881e-06
46.8	0.03886	0.04892	0.02339	0.02041	0.02365	0.03222	0.02438	0.01886		0.0344	0.0388	0.0309	0.0264	0.0238	0.0309	0.028	0.0189		0.00446	0.01012	-0.00751	-0.00599	-0.00015	0.00132	-0.00362	-4e-05		1.98916e-05	0.000102414	5.64001e-05	3.58801e-05	2.25e-08	1.7424e-06	1.31044e-05	1.6e-09
47	0.04021	0.05087	0.02499	0.02331	0.02395	0.03592	0.02588	0.01876		0.0346	0.0385	0.0309	0.0262	0.0237	0.0307	0.0278	0.0189		0.00561	0.01237	-0.00591	-0.00289	0.00025	0.00522	-0.00192	-0.00014		3.14721e-05	0.000153017	3.49281e-05	8.3521e-06	6.25e-08	2.72484e-05	3.6864e-06	1.96e-08
47.2	0.03741	0.04967	0.02414	0.02286	0.0246	0.03402	0.02273	0.01721		0.0346	0.0383	0.0309	0.0261	0.0235	0.0306	0.0276	0.018		0.00281	0.01137	-0.00676	-0.00324	0.0011	0.00342	-0.00487	-0.00079		7.8961e-06	0.000129277	4.56976e-05	1.04976e-05	1.21e-06	1.16964e-05	2.37169e-05	6.241e-07
47.4	0.03836	0.05062	0.02554	0.02086	0.0278	0.03767	0.02628	0.01881		0.0346	0.0379	0.0307	0.0261	0.0233	0.0306	0.0275	0.0185		0.00376	0.01272	-0.00516	-0.00524	0.0045	0.00707	-0.00122	0.00031		1.41376e-05	0.000161798	2.66256e-05	2.74576e-05	2.025e-05	4.99849e-05	1.4884e-06	9.61e-08
47.6	0.03766	0.04887	0.02409	0.02411	0.02765	0.03007	0.02233	0.02046		0.0346	0.0376	0.0305	0.026	0.0232	0.0305	0.0274	0.0195		0.00306	0.01127	-0.00641	-0.00189	0.00445	-0.00043	-0.00507	0.00096		9.3636e-06	0.000127013	4.10881e-05	3.5721e-06	1.98025e-05	1.849e-07	2.57049e-05	9.216e-07
47.8	0.03826	0.04922	0.02369	0.02421	0.0294	0.02872	0.02458	0.01966		0.0344	0.0372	0.0304	0.026	0.0232	0.0304	0.0274	0.0191		0.00386	0.01202	-0.00671	-0.00179	0.0062	-0.00168	-0.00282	0.00056		1.48996e-05	0.00014448	4.50241e-05	3.2041e-06	3.844e-05	2.8224e-06	7.9524e-06	3.136e-07
48	0.03711	0.04702	0.02474	0.02286	0.02785	0.02937	0.02208	0.02026		0.0342	0.0371	0.0303	0.0259	0.0231	0.0302	0.0273	0.0185		0.00291	0.00992	-0.00556	-0.00304	0.00475	-0.00083	-0.00522	0.00176		8.4681e-06	9.84064e-05	3.09136e-05	9.2416e-06	2.25625e-05	6.889e-07	2.72484e-05	3.0976e-06
48.2	0.03721	0.04657	0.02329	0.02546	0.027	0.03257	0.02243	0.01916		0.034	0.0371	0.0302	0.0258	0.0231	0.0301	0.0272	0.0178		0.00321	0.00947	-0.00691	-0.00034	0.0039	0.00247	-0.00477	0.00136		1.03041e-05	8.96809e-05	4.77481e-05	1.156e-07	1.521e-05	6.1009e-06	2.27529e-05	1.8496e-06
48.4	0.03751	0.04737	0.02439	0.02136	0.02365	0.03802	0.02418	0.01816		0.0338	0.037	0.03	0.0257	0.023	0.0299	0.0271	0.018		0.00371	0.01037	-0.00561	-0.00434	0.00065	0.00812	-0.00292	0.00016		1.37641e-05	0.000107537	3.14721e-05	1.88356e-05	4.225e-07	6.59344e-05	8.5264e-06	2.56e-08
48.6	0.03706	0.04752	0.02354	0.02216	0.02495	0.03542	0.02368	0.01846		0.0336	0.037	0.03	0.0255	0.023	0.0298	0.027	0.0184		0.00346	0.01052	-0.00646	-0.00334	0.00195	0.00562	-0.00332	6e-05		1.19716e-05	0.00011067	4.17316e-05	1.11556e-05	3.8025e-06	3.15844e-05	1.10224e-05	3.6e-09
48.8	0.03841	0.04902	0.02329	0.02116	0.02645	0.03912	0.02313	0.01886		0.0335	0.0368	0.0299	0.0254	0.0229	0.0296	0.0269	0.0175		0.00491	0.01222	-0.00661	-0.00424	0.00355	0.00952	-0.00377	0.00136		2.41081e-05	0.000149328	4.36921e-05	1.79776e-05	1.26025e-05	9.06304e-05	1.42129e-05	1.8496e-06
49	0.03731	0.04612	0.02369	0.02061	0.02715	0.03087	0.02403	0.01941		0.0335	0.0367	0.0298	0.0253	0.0228	0.0296	0.0267	0.0172		0.00381	0.00942	-0.00611	-0.00469	0.00435	0.00127	-0.00267	0.00221		1.45161e-05	8.87364e-05	3.73321e-05	2.19961e-05	1.89225e-05	1.6129e-06	7.1289e-06	4.8841e-06
49.2	0.03846	0.04617	0.02259	0.02056	0.0237	0.02712	0.02313	0.01986		0.0337	0.0365	0.0296	0.0252	0.0226	0.0295	0.0266	0.0167		0.00476	0.00967	-0.00701	-0.00464	0.0011	-0.00238	-0.00347	0.00316		2.26576e-05	9.35089e-05	4.91401e-05	2.15296e-05	1.21e-06	5.6644e-06	1.20409e-05	9.9856e-06
49.4	0.03706	0.04487	0.02399	0.02216	0.02135	0.02922	0.02418	0.01976		0.0337	0.0363	0.0295	0.0252	0.0226	0.0294	0.0265	0.0175		0.00336	0.00857	-0.00551	-0.00304	-0.00125	-0.00018	-0.00232	0.00226		1.12896e-05	7.34449e-05	3.03601e-05	9.2416e-06	1.5625e-06	3.24e-08	5.3824e-06	5.1076e-06
49.6	0.03711	0.04442	0.02314	0.02036	0.0226	0.02827	0.02128	0.01631		0.0334	0.0362	0.0294	0.0251	0.0225	0.0293	0.0264	0.0187		0.00371	0.00822	-0.00626	-0.00474	0.0001	-0.00103	-0.00512	-0.00239		1.37641e-05	6.75684e-05	3.91876e-05	2.24676e-05	1e-08	1.0609e-06	2.62144e-05	5.7121e-06
49.8	0.03671	0.04532	0.02229	0.02226	0.02245	0.03147	0.02123	0.01711		0.0333	0.0362	0.0294	0.0251	0.0225	0.0293	0.0263	0.0185		0.00341	0.00912	-0.00711	-0.00284	-5e-05	0.00217	-0.00507	-0.00139		1.16281e-05	8.31744e-05	5.05521e-05	8.0656e-06	2.5e-09	4.7089e-06	2.57049e-05	1.9321e-06
50	0.03686	0.04547	0.02319	0.02141	0.02015	0.02962	0.02373	0.01796		0.0332	0.0359	0.0294	0.0251	0.0225	0.0292	0.0263	0.0185		0.00366	0.00957	-0.00621	-0.00369	-0.00235	0.00042	-0.00257	-0.00054		1.33956e-05	9.15849e-05	3.85641e-05	1.36161e-05	5.5225e-06	1.764e-07	6.6049e-06	2.916e-07
50.2	0.03636	0.04502	0.02194	0.02051	0.0208	0.03052	0.02278	0.01791		0.033	0.0361	0.0293	0.0249	0.0224	0.0291	0.0262	0.0176		0.00336	0.00892	-0.00736	-0.00439	-0.0016	0.00142	-0.00342	0.00031		1.12896e-05	7.95664e-05	5.41696e-05	1.92721e-05	2.56e-06	2.0164e-06	1.16964e-05	9.61e-08
50.4	0.03666	0.04512	0.02359	0.02121	0.02165	0.03057	0.02173	0.01796		0.0327	0.0361	0.0292	0.0248	0.0223	0.029	0.0261	0.0169		0.00396	0.00902	-0.00561	-0.00359	-0.00065	0.00157	-0.00437	0.00106		1.56816e-05	8.13604e-05	3.14721e-05	1.28881e-05	4.225e-07	2.4649e-06	1.90969e-05	1.1236e-06
50.6	0.03656	0.04597	0.02259	0.02006	0.021	0.02977	0.02353	0.01736		0.0326	0.0364	0.029	0.0247	0.0222	0.0289	0.026	0.0171		0.00396	0.00957	-0.00641	-0.00464	-0.0012	0.00087	-0.00247	0.00026		1.56816e-05	9.15849e-05	4.10881e-05	2.15296e-05	1.44e-06	7.569e-07	6.1009e-06	6.76e-08
50.8	0.03591	0.04742	0.02209	0.02186	0.0216	0.03182	0.02178	0.01991		0.0326	0.0366	0.029	0.0246	0.0221	0.0288	0.0258	0.0174		0.00331	0.01082	-0.00691	-0.00274	-0.0005	0.00302	-0.00402	0.00251		1.09561e-05	0.000117072	4.77481e-05	7.5076e-06	2.5e-07	9.1204e-06	1.61604e-05	6.3001e-06
51	0.03661	0.04502	0.02324	0.02086	0.02245	0.03152	0.01913	0.01971		0.0327	0.0368	0.0289	0.0245	0.022	0.0287	0.0257	0.0183		0.00391	0.00822	-0.00566	-0.00364	0.00045	0.00282	-0.00657	0.00141		1.52881e-05	6.75684e-05	3.20356e-05	1.32496e-05	2.025e-07	7.9524e-06	4.31649e-05	1.9881e-06
51.2	0.03691	0.04547	0.02159	0.01971	0.02135	0.02647	0.02303	0.02031		0.0328	0.0367	0.029	0.0245	0.0219	0.0287	0.0257	0.0187		0.00411	0.00877	-0.00741	-0.00479	-0.00055	-0.00223	-0.00267	0.00161		1.68921e-05	7.69129e-05	5.49081e-05	2.29441e-05	3.025e-07	4.9729e-06	7.1289e-06	2.5921e-06
51.4	0.03546	0.04557	0.02244	0.02181	0.02205	0.02972	0.02193	0.02046		0.0329	0.0367	0.029	0.0244	0.0218	0.0287	0.0257	0.018		0.00256	0.00887	-0.00656	-0.00259	0.00025	0.00102	-0.00377	0.00246		6.5536e-06	7.86769e-05	4.30336e-05	6.7081e-06	6.25e-08	1.0404e-06	1.42129e-05	6.0516e-06
51.6	0.03576	0.04642	0.02404	0.02146	0.02235	0.02922	0.02388	0.01896		0.033	0.0364	0.0289	0.0245	0.0218	0.0287	0.0257	0.0183		0.00276	0.01002	-0.00486	-0.00304	0.00055	0.00052	-0.00182	0.00066		7.6176e-06	0.0001004	2.36196e-05	9.2416e-06	3.025e-07	2.704e-07	3.3124e-06	4.356e-07
51.8	0.03586	0.04797	0.02289	0.02006	0.02185	0.02937	0.02093	0.01836		0.0331	0.0363	0.0288	0.0245	0.0218	0.0287	0.0256	0.0178		0.00276	0.01167	-0.00591	-0.00444	5e-05	0.00067	-0.00467	0.00056		7.6176e-06	0.000136189	3.49281e-05	1.97136e-05	2.5e-09	4.489e-07	2.18089e-05	3.136e-07
52	0.03501	0.04752	0.02319	0.02046	0.0208	0.02997	0.02158	0.01981		0.0329	0.0363	0.0287	0.0245	0.0218	0.0287	0.0256	0.018		0.00211	0.01122	-0.00551	-0.00404	-0.001	0.00127	-0.00402	0.00181		4.4521e-06	0.000125888	3.03601e-05	1.63216e-05	1e-06	1.6129e-06	1.61604e-05	3.2761e-06
52.2	0.03546	0.04912	0.02194	0.02091	0.02045	0.03017	0.02178	0.01926		0.0329	0.0364	0.0287	0.0244	0.0218	0.0287	0.0256	0.0174		0.00256	0.01272	-0.00676	-0.00349	-0.00135	0.00147	-0.00382	0.00186		6.5536e-06	0.000161798	4.56976e-05	1.21801e-05	1.8225e-06	2.1609e-06	1.45924e-05	3.4596e-06
52.4	0.03521	0.04737	0.02169	0.01841	0.0239	0.02692	0.02103	0.01861		0.0329	0.0365	0.0287	0.0244	0.0218	0.0286	0.0256	0.0166		0.00231	0.01087	-0.00701	-0.00599	0.0021	-0.00168	-0.00457	0.00201		5.3361e-06	0.000118157	4.91401e-05	3.58801e-05	4.41e-06	2.8224e-06	2.08849e-05	4.0401e-06
52.6	0.03626	0.04582	0.02124	0.02091	0.02195	0.02807	0.02208	0.01851		0.033	0.0368	0.0287	0.0243	0.0218	0.0285	0.0256	0.0163		0.00326	0.00902	-0.00746	-0.00339	0.00015	-0.00043	-0.00352	0.00221		1.06276e-05	8.13604e-05	5.56516e-05	1.14921e-05	2.25e-08	1.849e-07	1.23904e-05	4.8841e-06
52.8	0.03581	0.04652	0.02089	0.01956	0.0249	0.02677	0.01973	0.01776		0.033	0.037	0.0287	0.0243	0.0217	0.0285	0.0256	0.0167		0.00281	0.00952	-0.00781	-0.00474	0.0032	-0.00173	-0.00587	0.00106		7.8961e-06	9.06304e-05	6.09961e-05	2.24676e-05	1.024e-05	2.9929e-06	3.44569e-05	1.1236e-06
53	0.03491	0.04637	0.02209	0.02011	0.02285	0.02792	0.02118	0.01771		0.0331	0.0374	0.0287	0.0243	0.0217	0.0285	0.0255	0.0182		0.00181	0.00897	-0.00661	-0.00419	0.00115	-0.00058	-0.00432	-0.00049		3.2761e-06	8.04609e-05	4.36921e-05	1.75561e-05	1.3225e-06	3.364e-07	1.86624e-05	2.401e-07
53.2	0.03616	0.04622	0.02224	0.02271	0.02095	0.02667	0.02258	0.01946		0.0333	0.0378	0.0287	0.0243	0.0217	0.0285	0.0254	0.0177		0.00286	0.00842	-0.00646	-0.00159	-0.00075	-0.00183	-0.00282	0.00176		8.1796e-06	7.08964e-05	4.17316e-05	2.5281e-06	5.625e-07	3.3489e-06	7.9524e-06	3.0976e-06
53.4	0.03596	0.04532	0.02189	0.01976	0.0215	0.03032	0.02058	0.01801		0.0336	0.0379	0.0288	0.0243	0.0217	0.0286	0.0253	0.0173		0.00236	0.00742	-0.00691	-0.00454	-0.0002	0.00172	-0.00472	0.00071		5.5696e-06	5.50564e-05	4.77481e-05	2.06116e-05	4e-08	2.9584e-06	2.22784e-05	5.041e-07
53.6	0.03526	0.04432	0.02264	0.02166	0.0201	0.02722	0.02048	0.01836		0.0339	0.0383	0.029	0.0244	0.0217	0.0287	0.0253	0.0169		0.00136	0.00602	-0.00636	-0.00274	-0.0016	-0.00148	-0.00482	0.00146		1.8496e-06	3.62404e-05	4.04496e-05	7.5076e-06	2.56e-06	2.1904e-06	2.32324e-05	2.1316e-06
53.8	0.03596	0.04552	0.02119	0.01961	0.02185	0.02632	0.01963	0.01791		0.0341	0.0384	0.029	0.0245	0.0217	0.0288	0.0254	0.0167		0.00186	0.00712	-0.00781	-0.00489	0.00015	-0.00248	-0.00577	0.00121		3.4596e-06	5.06944e-05	6.09961e-05	2.39121e-05	2.25e-08	6.1504e-06	3.32929e-05	1.4641e-06
54	0.03601	0.05037	0.02269	0.02031	0.02175	0.03027	0.02013	0.01831		0.0343	0.0384	0.0291	0.0246	0.0218	0.0289	0.0255	0.0173		0.00171	0.01197	-0.00641	-0.00429	-5e-05	0.00137	-0.00537	0.00101		2.9241e-06	0.000143281	4.10881e-05	1.84041e-05	2.5e-09	1.8769e-06	2.88369e-05	1.0201e-06
54.2	0.03571	0.05132	0.02109	0.01976	0.02105	0.02817	0.02393	0.01761		0.0344	0.0383	0.0292	0.0246	0.0219	0.029	0.0256	0.0165		0.00131	0.01302	-0.00811	-0.00484	-0.00085	-0.00083	-0.00167	0.00111		1.7161e-06	0.00016952	6.57721e-05	2.34256e-05	7.225e-07	6.889e-07	2.7889e-06	1.2321e-06
54.4	0.03571	0.04842	0.02294	0.01841	0.02065	0.02882	0.02193	0.01706		0.0343	0.0382	0.0291	0.0247	0.022	0.029	0.0257	0.0165		0.00141	0.01022	-0.00616	-0.00629	-0.00135	-0.00018	-0.00377	0.00056		1.9881e-06	0.000104448	3.79456e-05	3.95641e-05	1.8225e-06	3.24e-08	1.42129e-05	3.136e-07
54.6	0.03586	0.04687	0.02224	0.02096	0.02415	0.02652	0.02043	0.01916		0.0342	0.0381	0.029	0.0247	0.0221	0.0291	0.0257	0.0177		0.00166	0.00877	-0.00676	-0.00374	0.00205	-0.00258	-0.00527	0.00146		2.7556e-06	7.69129e-05	4.56976e-05	1.39876e-05	4.2025e-06	6.6564e-06	2.77729e-05	2.1316e-06
54.8	0.03601	0.04767	0.02249	0.01971	0.02225	0.02717	0.01953	0.01826		0.0342	0.0377	0.029	0.0248	0.0222	0.0292	0.0257	0.0181		0.00181	0.00997	-0.00651	-0.00509	5e-05	-0.00203	-0.00617	0.00016		3.2761e-06	9.94009e-05	4.23801e-05	2.59081e-05	2.5e-09	4.1209e-06	3.80689e-05	2.56e-08
55	0.03636	0.04847	0.02299	0.02111	0.02325	0.02857	0.02188	0.01886		0.034	0.0376	0.029	0.0247	0.0222	0.0292	0.0258	0.0182		0.00236	0.01087	-0.00601	-0.00359	0.00105	-0.00063	-0.00392	0.00066		5.5696e-06	0.000118157	3.61201e-05	1.28881e-05	1.1025e-06	3.969e-07	1.53664e-05	4.356e-07
55.2	0.03616	0.04622	0.02219	0.01991	0.02325	0.02592	0.02133	0.01796		0.0339	0.0379	0.0289	0.0247	0.0223	0.0291	0.0259	0.0172		0.00226	0.00832	-0.00671	-0.00479	0.00095	-0.00318	-0.00457	0.00076		5.1076e-06	6.92224e-05	4.50241e-05	2.29441e-05	9.025e-07	1.01124e-05	2.08849e-05	5.776e-07
55.4	0.03626	0.04712	0.02194	0.01901	0.0199	0.02647	0.02123	0.01846		0.0337	0.0383	0.0289	0.0247	0.0222	0.0291	0.0259	0.0168		0.00256	0.00882	-0.00696	-0.00569	-0.0023	-0.00263	-0.00467	0.00166		6.5536e-06	7.77924e-05	4.84416e-05	3.23761e-05	5.29e-06	6.9169e-06	2.18089e-05	2.7556e-06
55.6	0.03731	0.04512	0.02279	0.02096	0.0204	0.02722	0.02013	0.01846		0.0341	0.0391	0.0291	0.0247	0.0222	0.029	0.0259	0.0169		0.00321	0.00602	-0.00631	-0.00374	-0.0018	-0.00178	-0.00577	0.00156		1.03041e-05	3.62404e-05	3.98161e-05	1.39876e-05	3.24e-06	3.1684e-06	3.32929e-05	2.4336e-06
55.8	0.03621	0.04492	0.02229	0.01806	0.02325	0.02602	0.02173	0.01631		0.0345	0.0397	0.0294	0.0246	0.0221	0.0288	0.0258	0.0164		0.00171	0.00522	-0.00711	-0.00654	0.00115	-0.00278	-0.00407	-9e-05		2.9241e-06	2.72484e-05	5.05521e-05	4.27716e-05	1.3225e-06	7.7284e-06	1.65649e-05	8.1e-09
56	0.03706	0.04412	0.02384	0.02036	0.0261	0.02717	0.02098	0.01781		0.0351	0.0402	0.0296	0.0246	0.0221	0.0288	0.0257	0.0169		0.00196	0.00392	-0.00576	-0.00424	0.004	-0.00163	-0.00472	0.00091		3.8416e-06	1.53664e-05	3.31776e-05	1.79776e-05	1.6e-05	2.6569e-06	2.22784e-05	8.281e-07
56.2	0.03696	0.04302	0.02194	0.01836	0.02205	0.02522	0.02338	0.01986		0.0355	0.0404	0.0297	0.0248	0.0221	0.0291	0.0257	0.0175		0.00146	0.00262	-0.00776	-0.00644	-5e-05	-0.00388	-0.00232	0.00236		2.1316e-06	6.8644e-06	6.02176e-05	4.14736e-05	2.5e-09	1.50544e-05	5.3824e-06	5.5696e-06
56.4	0.03666	0.04482	0.02439	0.02156	0.02175	0.02527	0.01988	0.01786		0.0357	0.0404	0.0297	0.025	0.0221	0.0293	0.0257	0.0186		0.00096	0.00442	-0.00531	-0.00344	-0.00035	-0.00403	-0.00582	-0.00074		9.216e-07	1.95364e-05	2.81961e-05	1.18336e-05	1.225e-07	1.62409e-05	3.38724e-05	5.476e-07
56.6	0.03706	0.04662	0.02424	0.01991	0.0202	0.02722	0.02188	0.01861		0.0359	0.0404	0.0298	0.0253	0.0223	0.0296	0.0259	0.0187		0.00116	0.00622	-0.00556	-0.00539	-0.0021	-0.00238	-0.00402	-9e-05		1.3456e-06	3.86884e-05	3.09136e-05	2.90521e-05	4.41e-06	5.6644e-06	1.61604e-05	8.1e-09
56.8	0.03696	0.04597	0.02264	0.02111	0.0217	0.03132	0.01753	0.01761		0.0357	0.0402	0.0299	0.0255	0.0226	0.0299	0.0261	0.0186		0.00126	0.00577	-0.00726	-0.00439	-0.0009	0.00142	-0.00857	-0.00099		1.5876e-06	3.32929e-05	5.27076e-05	1.92721e-05	8.1e-07	2.0164e-06	7.34449e-05	9.801e-07
57	0.03736	0.04332	0.02399	0.02026	0.0211	0.02837	0.02188	0.01806		0.0357	0.0401	0.0301	0.0255	0.0228	0.03	0.0263	0.0186		0.00166	0.00322	-0.00611	-0.00524	-0.0017	-0.00163	-0.00442	-0.00054		2.7556e-06	1.03684e-05	3.73321e-05	2.74576e-05	2.89e-06	2.6569e-06	1.95364e-05	2.916e-07
57.2	0.03741	0.04482	0.02244	0.02196	0.0223	0.02582	0.02248	0.01636		0.0358	0.0397	0.0302	0.0254	0.0229	0.03	0.0264	0.0186		0.00161	0.00512	-0.00776	-0.00344	-0.0006	-0.00418	-0.00392	-0.00224		2.5921e-06	2.62144e-05	6.02176e-05	1.18336e-05	3.6e-07	1.74724e-05	1.53664e-05	5.0176e-06
57.4	0.03681	0.04497	0.02499	0.01996	0.0249	0.02677	0.02093	0.01976		0.0354	0.0398	0.03	0.0253	0.0229	0.0299	0.0264	0.0184		0.00141	0.00517	-0.00501	-0.00534	0.002	-0.00313	-0.00547	0.00136		1.9881e-06	2.67289e-05	2.51001e-05	2.85156e-05	4e-06	9.7969e-06	2.99209e-05	1.8496e-06
57.6	0.03711	0.04552	0.02289	0.02396	0.02585	0.02747	0.02413	0.01816		0.035	0.0395	0.0297	0.0254	0.0229	0.03	0.0265	0.0184		0.00211	0.00602	-0.00681	-0.00144	0.00295	-0.00253	-0.00237	-0.00024		4.4521e-06	3.62404e-05	4.63761e-05	2.0736e-06	8.7025e-06	6.4009e-06	5.6169e-06	5.76e-08
57.8	0.03781	0.04447	0.02209	0.02011	0.0266	0.02692	0.02208	0.01896		0.035	0.0395	0.0297	0.0252	0.0229	0.0299	0.0265	0.0184		0.00281	0.00497	-0.00761	-0.00509	0.0037	-0.00298	-0.00442	0.00056		7.8961e-06	2.47009e-05	5.79121e-05	2.59081e-05	1.369e-05	8.8804e-06	1.95364e-05	3.136e-07
58	0.03711	0.04682	0.02254	0.02051	0.0288	0.02742	0.02073	0.01806		0.0351	0.0392	0.0297	0.0252	0.023	0.0299	0.0266	0.0184		0.00201	0.00762	-0.00716	-0.00469	0.0058	-0.00248	-0.00587	-0.00034		4.0401e-06	5.80644e-05	5.12656e-05	2.19961e-05	3.364e-05	6.1504e-06	3.44569e-05	1.156e-07
58.2	0.03761	0.04937	0.02154	0.02006	0.02295	0.02647	0.02248	0.01916		0.0355	0.0391	0.0298	0.0252	0.0229	0.0298	0.0265	0.0183		0.00211	0.01027	-0.00826	-0.00514	5e-05	-0.00333	-0.00402	0.00086		4.4521e-06	0.000105473	6.82276e-05	2.64196e-05	2.5e-09	1.10889e-05	1.61604e-05	7.396e-07
58.4	0.03686	0.05132	0.02349	0.02336	0.02485	0.02642	0.02178	0.01986		0.0353	0.0389	0.0299	0.0254	0.0228	0.0298	0.0265	0.0181		0.00156	0.01242	-0.00641	-0.00204	0.00205	-0.00338	-0.00472	0.00176		2.4336e-06	0.000154256	4.10881e-05	4.1616e-06	4.2025e-06	1.14244e-05	2.22784e-05	3.0976e-06
58.6	0.03676	0.04957	0.02349	0.02086	0.02355	0.02702	0.02353	0.01876		0.0353	0.0391	0.0299	0.0254	0.0227	0.0297	0.0266	0.0177		0.00146	0.01047	-0.00641	-0.00454	0.00085	-0.00268	-0.00307	0.00106		2.1316e-06	0.000109621	4.10881e-05	2.06116e-05	7.225e-07	7.1824e-06	9.4249e-06	1.1236e-06
58.8	0.03721	0.04937	0.02144	0.02091	0.02495	0.02792	0.02153	0.01666		0.0352	0.039	0.0301	0.0255	0.0228	0.0297	0.0265	0.0174		0.00201	0.01037	-0.00866	-0.00459	0.00215	-0.00178	-0.00497	-0.00074		4.0401e-06	0.000107537	7.49956e-05	2.10681e-05	4.6225e-06	3.1684e-06	2.47009e-05	5.476e-07
59	0.03686	0.04882	0.02369	0.02296	0.0258	0.03112	0.02198	0.01726		0.035	0.0393	0.0303	0.0254	0.0228	0.0296	0.0265	0.017		0.00186	0.00952	-0.00661	-0.00244	0.003	0.00152	-0.00452	0.00026		3.4596e-06	9.06304e-05	4.36921e-05	5.9536e-06	9e-06	2.3104e-06	2.04304e-05	6.76e-08
59.2	0.03836	0.04712	0.02344	0.02206	0.0274	0.02967	0.02228	0.01661		0.0351	0.0399	0.0303	0.0255	0.0229	0.0297	0.0264	0.0169		0.00326	0.00722	-0.00686	-0.00344	0.0045	-3e-05	-0.00412	-0.00029		1.06276e-05	5.21284e-05	4.70596e-05	1.18336e-05	2.025e-05	9e-10	1.69744e-05	8.41e-08
59.4	0.03736	0.04587	0.02459	0.01946	0.02775	0.02847	0.02173	0.01706		0.0351	0.0405	0.0303	0.0254	0.0229	0.0298	0.0264	0.0172		0.00226	0.00537	-0.00571	-0.00594	0.00485	-0.00133	-0.00467	-0.00014		5.1076e-06	2.88369e-05	3.26041e-05	3.52836e-05	2.35225e-05	1.7689e-06	2.18089e-05	1.96e-08
59.6	0.03796	0.04642	0.02274	0.02311	0.02575	0.02852	0.02268	0.02011		0.0353	0.0408	0.0303	0.0255	0.0229	0.0299	0.0265	0.0176		0.00266	0.00562	-0.00756	-0.00239	0.00285	-0.00138	-0.00382	0.00251		7.0756e-06	3.15844e-05	5.71536e-05	5.7121e-06	8.1225e-06	1.9044e-06	1.45924e-05	6.3001e-06
59.8	0.03706	0.04827	0.02204	0.02016	0.03275	0.02817	0.02248	0.01871		0.0356	0.0409	0.0303	0.0255	0.0229	0.0299	0.0266	0.0184		0.00146	0.00737	-0.00826	-0.00534	0.00985	-0.00173	-0.00412	0.00031		2.1316e-06	5.43169e-05	6.82276e-05	2.85156e-05	9.70225e-05	2.9929e-06	1.69744e-05	9.61e-08
										0.0357	0.0409	0.0303	0.0255	0.0229	0.03	0.0266	0.0187		-0.0357	-0.0409	-0.0303	-0.0255	-0.0229	-0.03	-0.0266	-0.0187		0.00127449	0.00167281	0.00091809	0.00065025	0.00052441	0.0009	0.00070756	0.00034969

## Sheet: RMSE_BR_10
t	S3	S4	S5	S6	S7	S8	S9	S10		HEC_M10_P3	HEC_M10_P4	HEC_M10_P5	HEC_M10_P6	HEC_M10_P7	HEC_M10_P8	HEC_M10_P9	HEC_M10_P10		Error_3	Error_4	Error_5	Error_6	Error_7	Error_8	Error_9	Error_10		Error^2_3	Error^2_4	Error^2_5	Error^2_6	Error^2_7	Error^2_8	Error^2_9	Error^2_10		RMSE_3	RMSE_4	RMSE_5	RMSE_6	RMSE_7	RMSE_8	RMSE_9	RMSE_10
0	0.00011	-8e-05	0.00039	6e-05	0	-3e-05	-7e-05	-4e-05		0	0	0	0	0	0	0	0		0.00011	-8e-05	0.00039	6e-05	0	-3e-05	-7e-05	-4e-05		1.21e-08	6.4e-09	1.521e-07	3.6e-09	0	9e-10	4.9e-09	1.6e-09		0.973013	1.23922	0.955714	0.55151	0.548125	0.618298	0.560774	0.356839
0.2	-0.00014	7e-05	-6e-05	0.00011	0	-3e-05	-7e-05	-9e-05		0	0	0	0	0	0	0	0		-0.00014	7e-05	-6e-05	0.00011	0	-3e-05	-7e-05	-9e-05		1.96e-08	4.9e-09	3.6e-09	1.21e-08	0	9e-10	4.9e-09	8.1e-09
0.4	-0.00014	-3e-05	-6e-05	6e-05	-0.00015	0.00012	-2e-05	-9e-05		0	0	0	0	0	0	0	0		-0.00014	-3e-05	-6e-05	6e-05	-0.00015	0.00012	-2e-05	-9e-05		1.96e-08	9e-10	3.6e-09	3.6e-09	2.25e-08	1.44e-08	4e-10	8.1e-09
0.6	6e-05	2e-05	-6e-05	6e-05	5e-05	-8e-05	3e-05	-9e-05		0	0	0	0	0	0	0	0		6e-05	2e-05	-6e-05	6e-05	5e-05	-8e-05	3e-05	-9e-05		3.6e-09	4e-10	3.6e-09	3.6e-09	2.5e-09	6.4e-09	9e-10	8.1e-09
0.8	1e-05	-0.00013	4e-05	6e-05	-5e-05	-3e-05	3e-05	-9e-05		0	0	0	0	0	0	0	0		1e-05	-0.00013	4e-05	6e-05	-5e-05	-3e-05	3e-05	-9e-05		1e-10	1.69e-08	1.6e-09	3.6e-09	2.5e-09	9e-10	9e-10	8.1e-09
1	-0.00014	0.00017	-6e-05	6e-05	-0.00015	0.00012	3e-05	-0.00014		0	0	0	0	0	0	0	0		-0.00014	0.00017	-6e-05	6e-05	-0.00015	0.00012	3e-05	-0.00014		1.96e-08	2.89e-08	3.6e-09	3.6e-09	2.25e-08	1.44e-08	9e-10	1.96e-08
1.2	1e-05	-3e-05	-0.00021	1e-05	0.0001	-3e-05	-2e-05	-0.00014		0	0	0	0	0	0	0	0		1e-05	-3e-05	-0.00021	1e-05	0.0001	-3e-05	-2e-05	-0.00014		1e-10	9e-10	4.41e-08	1e-10	1e-08	9e-10	4e-10	1.96e-08
1.4	1e-05	-3e-05	9e-05	6e-05	0	-3e-05	-2e-05	-0.00014		0	0	0	0	0	0	0	0		1e-05	-3e-05	9e-05	6e-05	0	-3e-05	-2e-05	-0.00014		1e-10	9e-10	8.1e-09	3.6e-09	0	9e-10	4e-10	1.96e-08
1.6	0.00026	-0.00013	4e-05	-4e-05	-5e-05	0.00012	-2e-05	-0.00014		0	0	0	0	0	0	0	0		0.00026	-0.00013	4e-05	-4e-05	-5e-05	0.00012	-2e-05	-0.00014		6.76e-08	1.69e-08	1.6e-09	1.6e-09	2.5e-09	1.44e-08	4e-10	1.96e-08
1.8	1e-05	0.00027	-1e-05	-4e-05	0.0002	-0.00013	3e-05	-0.00014		0	0	0	0	0	0	0	0		1e-05	0.00027	-1e-05	-4e-05	0.0002	-0.00013	3e-05	-0.00014		1e-10	7.29e-08	1e-10	1.6e-09	4e-08	1.69e-08	9e-10	1.96e-08
2	-9e-05	2e-05	-1e-05	1e-05	0	-3e-05	0.00013	-9e-05		0	0	0	0	0	0	0	0		-9e-05	2e-05	-1e-05	1e-05	0	-3e-05	0.00013	-9e-05		8.1e-09	4e-10	1e-10	1e-10	0	9e-10	1.69e-08	8.1e-09
2.2	0.00011	-0.00018	-1e-05	-4e-05	0	0.00012	0.00013	-9e-05		0	0	0	0	0	0	0	0		0.00011	-0.00018	-1e-05	-4e-05	0	0.00012	0.00013	-9e-05		1.21e-08	3.24e-08	1e-10	1.6e-09	0	1.44e-08	1.69e-08	8.1e-09
2.4	1e-05	-0.00013	-1e-05	1e-05	-0.00015	-0.00013	0.00013	1e-05		0	0	0	0	0	0	0	0		1e-05	-0.00013	-1e-05	1e-05	-0.00015	-0.00013	0.00013	1e-05		1e-10	1.69e-08	1e-10	1e-10	2.25e-08	1.69e-08	1.69e-08	1e-10
2.6	-9e-05	0.00032	-0.00016	-4e-05	5e-05	7e-05	0.00023	0.00011		0	0	0	0	0	0	0	0		-9e-05	0.00032	-0.00016	-4e-05	5e-05	7e-05	0.00023	0.00011		8.1e-09	1.024e-07	2.56e-08	1.6e-09	2.5e-09	4.9e-09	5.29e-08	1.21e-08
2.8	0.00011	7e-05	4e-05	-4e-05	0	0.00012	-7e-05	0.00031		0	0	0	0	0	0	0	0		0.00011	7e-05	4e-05	-4e-05	0	0.00012	-7e-05	0.00031		1.21e-08	4.9e-09	1.6e-09	1.6e-09	0	1.44e-08	4.9e-09	9.61e-08
3	1e-05	-8e-05	4e-05	-4e-05	-0.00015	-0.00013	-0.00012	0.00021		0	0	0	0	0	0	0	0		1e-05	-8e-05	4e-05	-4e-05	-0.00015	-0.00013	-0.00012	0.00021		1e-10	6.4e-09	1.6e-09	1.6e-09	2.25e-08	1.69e-08	1.44e-08	4.41e-08
3.2	-0.00014	-0.00013	-0.00016	-9e-05	0.0001	-0.00013	-0.00012	0.00011		0	0	0	0	0	0	0	0		-0.00014	-0.00013	-0.00016	-9e-05	0.0001	-0.00013	-0.00012	0.00011		1.96e-08	1.69e-08	2.56e-08	8.1e-09	1e-08	1.69e-08	1.44e-08	1.21e-08
3.4	6e-05	0.00017	0.00034	-4e-05	0	0.00012	-7e-05	0.00011		0	0	0	0	0	0	0	0		6e-05	0.00017	0.00034	-4e-05	0	0.00012	-7e-05	0.00011		3.6e-09	2.89e-08	1.156e-07	1.6e-09	0	1.44e-08	4.9e-09	1.21e-08
3.6	1e-05	-3e-05	-6e-05	-9e-05	0	-0.00018	-7e-05	0.00016		0	0	0	0	0	0	0	0		1e-05	-3e-05	-6e-05	-9e-05	0	-0.00018	-7e-05	0.00016		1e-10	9e-10	3.6e-09	8.1e-09	0	3.24e-08	4.9e-09	2.56e-08
3.8	-0.00014	2e-05	-1e-05	-4e-05	0.0002	7e-05	-2e-05	0.00011		0	0	0	0	0	0	0	0		-0.00014	2e-05	-1e-05	-4e-05	0.0002	7e-05	-2e-05	0.00011		1.96e-08	4e-10	1e-10	1.6e-09	4e-08	4.9e-09	4e-10	1.21e-08
4	1e-05	-8e-05	-0.00016	-9e-05	0	2e-05	-2e-05	6e-05		0	0	0	0	0	0	0	0		1e-05	-8e-05	-0.00016	-9e-05	0	2e-05	-2e-05	6e-05		1e-10	6.4e-09	2.56e-08	8.1e-09	0	4e-10	4e-10	3.6e-09
4.2	-4e-05	7e-05	-1e-05	-9e-05	-5e-05	-0.00018	-0.00017	6e-05		0	0	0	0	0	0	0	0		-4e-05	7e-05	-1e-05	-9e-05	-5e-05	-0.00018	-0.00017	6e-05		1.6e-09	4.9e-09	1e-10	8.1e-09	2.5e-09	3.24e-08	2.89e-08	3.6e-09
4.4	0.00011	7e-05	-0.00016	-9e-05	5e-05	-8e-05	3e-05	6e-05		0	0	0	0	0	0	0	0		0.00011	7e-05	-0.00016	-9e-05	5e-05	-8e-05	3e-05	6e-05		1.21e-08	4.9e-09	2.56e-08	8.1e-09	2.5e-09	6.4e-09	9e-10	3.6e-09
4.6	-4e-05	-3e-05	-0.00021	-4e-05	5e-05	2e-05	3e-05	1e-05		0	0	0	0	0	0	0	0		-4e-05	-3e-05	-0.00021	-4e-05	5e-05	2e-05	3e-05	1e-05		1.6e-09	9e-10	4.41e-08	1.6e-09	2.5e-09	4e-10	9e-10	1e-10
4.8	-9e-05	-8e-05	4e-05	-4e-05	-5e-05	-0.00023	-2e-05	6e-05		0	0	0	0	0	0	0	0		-9e-05	-8e-05	4e-05	-4e-05	-5e-05	-0.00023	-2e-05	6e-05		8.1e-09	6.4e-09	1.6e-09	1.6e-09	2.5e-09	5.29e-08	4e-10	3.6e-09
5	0.00016	-8e-05	-6e-05	1e-05	-0.0002	-3e-05	3e-05	1e-05		0	0	0	0	0	0	0	0		0.00016	-8e-05	-6e-05	1e-05	-0.0002	-3e-05	3e-05	1e-05		2.56e-08	6.4e-09	3.6e-09	1e-10	4e-08	9e-10	9e-10	1e-10
5.2	-4e-05	7e-05	-0.00011	1e-05	5e-05	-3e-05	8e-05	1e-05		0	0	0	0	0	0	0	0		-4e-05	7e-05	-0.00011	1e-05	5e-05	-3e-05	8e-05	1e-05		1.6e-09	4.9e-09	1.21e-08	1e-10	2.5e-09	9e-10	6.4e-09	1e-10
5.4	-0.00014	2e-05	9e-05	-9e-05	-0.0001	-0.00018	8e-05	1e-05		0	0	0	0	0	0	0	0		-0.00014	2e-05	9e-05	-9e-05	-0.0001	-0.00018	8e-05	1e-05		1.96e-08	4e-10	8.1e-09	8.1e-09	1e-08	3.24e-08	6.4e-09	1e-10
5.6	6e-05	-3e-05	-6e-05	-0.00019	-0.0001	-0.00013	0.00013	-9e-05		0	0	0	0	0	0	0	0		6e-05	-3e-05	-6e-05	-0.00019	-0.0001	-0.00013	0.00013	-9e-05		3.6e-09	9e-10	3.6e-09	3.61e-08	1e-08	1.69e-08	1.69e-08	8.1e-09
5.8	1e-05	-8e-05	-6e-05	1e-05	0.0001	-8e-05	0.00033	-4e-05		0	0	0	0	0	0	0	0		1e-05	-8e-05	-6e-05	1e-05	0.0001	-8e-05	0.00033	-4e-05		1e-10	6.4e-09	3.6e-09	1e-10	1e-08	6.4e-09	1.089e-07	1.6e-09
6	-0.00014	7e-05	-0.00021	-4e-05	-0.0001	-3e-05	3e-05	1e-05		0	0	0	0	0	0	0	0		-0.00014	7e-05	-0.00021	-4e-05	-0.0001	-3e-05	3e-05	1e-05		1.96e-08	4.9e-09	4.41e-08	1.6e-09	1e-08	9e-10	9e-10	1e-10
6.2	6e-05	-3e-05	-1e-05	-4e-05	0	-0.00013	-0.00017	-4e-05		0	0	0	0	0	0	0	0		6e-05	-3e-05	-1e-05	-4e-05	0	-0.00013	-0.00017	-4e-05		3.6e-09	9e-10	1e-10	1.6e-09	0	1.69e-08	2.89e-08	1.6e-09
6.4	1e-05	-3e-05	4e-05	-4e-05	0.0002	2e-05	-0.00012	-4e-05		0	0	0	0	0	0	0	0		1e-05	-3e-05	4e-05	-4e-05	0.0002	2e-05	-0.00012	-4e-05		1e-10	9e-10	1.6e-09	1.6e-09	4e-08	4e-10	1.44e-08	1.6e-09
6.6	-0.00014	-0.00013	-0.00016	-4e-05	0	0.00032	-7e-05	1e-05		0	0	0	0	0	0	0	0		-0.00014	-0.00013	-0.00016	-4e-05	0	0.00032	-7e-05	1e-05		1.96e-08	1.69e-08	2.56e-08	1.6e-09	0	1.024e-07	4.9e-09	1e-10
6.8	1e-05	2e-05	0.00014	-9e-05	0	-0.00013	-7e-05	-4e-05		0	0	0	0	0	0	0	0		1e-05	2e-05	0.00014	-9e-05	0	-0.00013	-7e-05	-4e-05		1e-10	4e-10	1.96e-08	8.1e-09	0	1.69e-08	4.9e-09	1.6e-09
7	-4e-05	2e-05	-6e-05	-9e-05	-0.00015	-0.00018	-2e-05	1e-05		0	0	0	0	0	0	0	0		-4e-05	2e-05	-6e-05	-9e-05	-0.00015	-0.00018	-2e-05	1e-05		1.6e-09	4e-10	3.6e-09	8.1e-09	2.25e-08	3.24e-08	4e-10	1e-10
7.2	6e-05	-0.00013	-6e-05	-4e-05	5e-05	-3e-05	-2e-05	-4e-05		0	0	0	0	0	0	0	0		6e-05	-0.00013	-6e-05	-4e-05	5e-05	-3e-05	-2e-05	-4e-05		3.6e-09	1.69e-08	3.6e-09	1.6e-09	2.5e-09	9e-10	4e-10	1.6e-09
7.4	1e-05	-0.00018	-0.00016	-9e-05	0	-0.00018	8e-05	-0.00014		0	0	0	0	0	0	0	0		1e-05	-0.00018	-0.00016	-9e-05	0	-0.00018	8e-05	-0.00014		1e-10	3.24e-08	2.56e-08	8.1e-09	0	3.24e-08	6.4e-09	1.96e-08
7.6	-9e-05	0.00012	-6e-05	-0.00014	-0.0002	-8e-05	3e-05	-4e-05		0	0	0	0	0	0	0	0		-9e-05	0.00012	-6e-05	-0.00014	-0.0002	-8e-05	3e-05	-4e-05		8.1e-09	1.44e-08	3.6e-09	1.96e-08	4e-08	6.4e-09	9e-10	1.6e-09
7.8	0.00011	2e-05	-0.00026	-4e-05	5e-05	2e-05	3e-05	1e-05		0	0	0	0	0	0	0	0		0.00011	2e-05	-0.00026	-4e-05	5e-05	2e-05	3e-05	1e-05		1.21e-08	4e-10	6.76e-08	1.6e-09	2.5e-09	4e-10	9e-10	1e-10
8	-4e-05	-3e-05	-0.00021	-0.00014	-5e-05	-0.00018	-2e-05	-4e-05		0	0	0	0	0	0	0	0		-4e-05	-3e-05	-0.00021	-0.00014	-5e-05	-0.00018	-2e-05	-4e-05		1.6e-09	9e-10	4.41e-08	1.96e-08	2.5e-09	3.24e-08	4e-10	1.6e-09
8.2	-0.00014	-0.00018	4e-05	-0.00014	-0.0001	-3e-05	-2e-05	-9e-05		0	0	0	0	0	0	0	0		-0.00014	-0.00018	4e-05	-0.00014	-0.0001	-3e-05	-2e-05	-9e-05		1.96e-08	3.24e-08	1.6e-09	1.96e-08	1e-08	9e-10	4e-10	8.1e-09
8.4	6e-05	7e-05	-6e-05	-0.00014	0.0001	2e-05	8e-05	-9e-05		0	0	0	0	0	0	0	0		6e-05	7e-05	-6e-05	-0.00014	0.0001	2e-05	8e-05	-9e-05		3.6e-09	4.9e-09	3.6e-09	1.96e-08	1e-08	4e-10	6.4e-09	8.1e-09
8.6	1e-05	-3e-05	-0.00016	-9e-05	-5e-05	-0.00023	8e-05	-9e-05		0	0	0	0	0	0	0	0		1e-05	-3e-05	-0.00016	-9e-05	-5e-05	-0.00023	8e-05	-9e-05		1e-10	9e-10	2.56e-08	8.1e-09	2.5e-09	5.29e-08	6.4e-09	8.1e-09
8.8	-0.00014	-8e-05	0.00024	-0.00014	-5e-05	2e-05	8e-05	-0.00014		0	0	0	0	0	0	0	0		-0.00014	-8e-05	0.00024	-0.00014	-5e-05	2e-05	8e-05	-0.00014		1.96e-08	6.4e-09	5.76e-08	1.96e-08	2.5e-09	4e-10	6.4e-09	1.96e-08
9	6e-05	-0.00013	-6e-05	-0.00014	0	-3e-05	0.00013	-0.00014		0	0	0	0	0	0	0	0		6e-05	-0.00013	-6e-05	-0.00014	0	-3e-05	0.00013	-0.00014		3.6e-09	1.69e-08	3.6e-09	1.96e-08	0	9e-10	1.69e-08	1.96e-08
9.2	1e-05	0.00012	-6e-05	-0.00019	0	-0.00023	8e-05	-0.00014		0	0	0	0	0	0	0	0		1e-05	0.00012	-6e-05	-0.00019	0	-0.00023	8e-05	-0.00014		1e-10	1.44e-08	3.6e-09	3.61e-08	0	5.29e-08	6.4e-09	1.96e-08
9.4	-0.00014	-3e-05	-0.00021	-0.00019	0	-8e-05	-0.00012	-9e-05		0	0	0	0	0	0	0	0		-0.00014	-3e-05	-0.00021	-0.00019	0	-8e-05	-0.00012	-9e-05		1.96e-08	9e-10	4.41e-08	3.61e-08	0	6.4e-09	1.44e-08	8.1e-09
9.6	-4e-05	-8e-05	4e-05	-0.00019	-0.00015	-0.00013	-0.00012	-0.00014		0	0	0	0	0	0	0	0		-4e-05	-8e-05	4e-05	-0.00019	-0.00015	-0.00013	-0.00012	-0.00014		1.6e-09	6.4e-09	1.6e-09	3.61e-08	2.25e-08	1.69e-08	1.44e-08	1.96e-08
9.8	-4e-05	-0.00018	-1e-05	-0.00024	0	-0.00013	-0.00012	-0.00019		0	0	0	0	0	0	0	0		-4e-05	-0.00018	-1e-05	-0.00024	0	-0.00013	-0.00012	-0.00019		1.6e-09	3.24e-08	1e-10	5.76e-08	0	1.69e-08	1.44e-08	3.61e-08
10	1e-05	7e-05	-0.00021	-0.00019	-0.0002	-0.00013	-7e-05	-0.00014		0	0	0	0	0	0	0	0		1e-05	7e-05	-0.00021	-0.00019	-0.0002	-0.00013	-7e-05	-0.00014		1e-10	4.9e-09	4.41e-08	3.61e-08	4e-08	1.69e-08	4.9e-09	1.96e-08
10.2	-4e-05	-3e-05	9e-05	-0.00019	-0.0002	-8e-05	-7e-05	-0.00014		0	0	0	0	0	0	0	0		-4e-05	-3e-05	9e-05	-0.00019	-0.0002	-8e-05	-7e-05	-0.00014		1.6e-09	9e-10	8.1e-09	3.61e-08	4e-08	6.4e-09	4.9e-09	1.96e-08
10.4	-9e-05	-3e-05	-6e-05	-0.00024	5e-05	0.00027	-2e-05	-0.00019		0	0	0	0	0	0	0	0		-9e-05	-3e-05	-6e-05	-0.00024	5e-05	0.00027	-2e-05	-0.00019		8.1e-09	9e-10	3.6e-09	5.76e-08	2.5e-09	7.29e-08	4e-10	3.61e-08
10.6	0.00011	-0.00013	-0.00011	-0.00024	-0.0001	-0.00013	3e-05	-0.00014		0	0.0334	0	0	0	0	0	0		0.00011	-0.03353	-0.00011	-0.00024	-0.0001	-0.00013	3e-05	-0.00014		1.21e-08	0.00112426	1.21e-08	5.76e-08	1e-08	1.69e-08	9e-10	1.96e-08
10.8	-9e-05	0.00012	4e-05	-0.00024	-0.00015	-8e-05	-2e-05	-0.00019		0.0096	0.0355	0	0	0	0	0	0		-0.00969	-0.03538	4e-05	-0.00024	-0.00015	-8e-05	-2e-05	-0.00019		9.38961e-05	0.00125174	1.6e-09	5.76e-08	2.25e-08	6.4e-09	4e-10	3.61e-08
11	-9e-05	0.01222	-6e-05	-0.00024	0.00015	2e-05	-2e-05	-0.00014		0.0346	0.0772	0	0	0	0	0	0		-0.03469	-0.06498	-6e-05	-0.00024	0.00015	2e-05	-2e-05	-0.00014		0.0012034	0.0042224	3.6e-09	5.76e-08	2.25e-08	4e-10	4e-10	1.96e-08
11.2	0.00856	0.01177	-6e-05	-0.00034	0	-0.00013	-7e-05	-9e-05		0.0522	0.0715	0.0307	0	0	0	0	0		-0.04364	-0.05973	-0.03076	-0.00034	0	-0.00013	-7e-05	-9e-05		0.00190445	0.00356767	0.000946178	1.156e-07	0	1.69e-08	4.9e-09	8.1e-09
11.4	0.01061	0.01367	0.00559	-0.00024	-5e-05	-8e-05	8e-05	1e-05		0.053	0.0763	0.0283	0	0	0	0	0		-0.04239	-0.06263	-0.02271	-0.00024	-5e-05	-8e-05	8e-05	1e-05		0.00179691	0.00392252	0.000515744	5.76e-08	2.5e-09	6.4e-09	6.4e-09	1e-10
11.6	0.01181	0.02292	0.01494	-0.00024	-0.0002	2e-05	3e-05	0.00011		0.0556	0.075	0.0295	0	0	0	0	0		-0.04379	-0.05208	-0.01456	-0.00024	-0.0002	2e-05	3e-05	0.00011		0.00191756	0.00271233	0.000211994	5.76e-08	4e-08	4e-10	9e-10	1.21e-08
11.8	0.01331	0.03092	0.01844	-0.00029	5e-05	-0.00023	-2e-05	0.00026		0.0555	0.0788	0.0314	0.0078	0	0.0306	0	0		-0.04219	-0.04788	-0.01296	-0.00809	5e-05	-0.03083	-2e-05	0.00026		0.00178	0.00229249	0.000167962	6.54481e-05	2.5e-09	0.000950489	4e-10	6.76e-08
12	0.01706	0.03382	0.01754	0.00066	0	0.00627	8e-05	0.00016		0.0613	0.082	0.0353	0.0081	0	0.0322	0	0		-0.04424	-0.04818	-0.01776	-0.00744	0	-0.02593	8e-05	0.00016		0.00195718	0.00232131	0.000315418	5.53536e-05	0	0.000672365	6.4e-09	2.56e-08
12.2	0.01746	0.03642	0.01979	0.00136	-0.00015	0.01307	8e-05	0.00011		0.0639	0.0804	0.0431	0.0287	0.0224	0.0341	0.0147	0		-0.04644	-0.04398	-0.02331	-0.02734	-0.02255	-0.02103	-0.01462	0.00011		0.00215667	0.00193424	0.000543356	0.000747476	0.000508503	0.000442261	0.000213744	1.21e-08
12.4	0.02076	0.04367	0.02344	0.00266	0.0067	0.01547	0.00033	6e-05		0.0624	0.0795	0.041	0.0294	0.0218	0.0406	0.0053	0		-0.04164	-0.03583	-0.01756	-0.02674	-0.0151	-0.02513	-0.00497	6e-05		0.00173389	0.00128379	0.000308354	0.000715028	0.00022801	0.000631517	2.47009e-05	3.6e-09
12.6	0.02851	0.04817	0.02414	0.01246	0.0123	0.01622	0.00098	6e-05		0.0677	0.0835	0.0404	0.0291	0.026	0.0431	0.0074	0		-0.03919	-0.03533	-0.01626	-0.01664	-0.0137	-0.02688	-0.00642	6e-05		0.00153586	0.00124821	0.000264388	0.00027689	0.00018769	0.000722534	4.12164e-05	3.6e-09
12.8	0.03826	0.06057	0.02669	0.01386	0.01965	0.01752	0.00308	1e-05		0.0681	0.0876	0.0398	0.0308	0.0304	0.0441	0.0257	0		-0.02984	-0.02703	-0.01311	-0.01694	-0.01075	-0.02658	-0.02262	1e-05		0.000890426	0.000730621	0.000171872	0.000286964	0.000115562	0.000706496	0.000511664	1e-10
13	0.04916	0.07412	0.02794	0.02156	0.02145	0.01862	0.00578	1e-05		0.0746	0.0876	0.0425	0.0305	0.0355	0.0449	0.03	0		-0.02544	-0.01348	-0.01456	-0.00894	-0.01405	-0.02628	-0.02422	1e-05		0.000647194	0.00018171	0.000211994	7.99236e-05	0.000197402	0.000690638	0.000586608	1e-10
13.2	0.06541	0.07367	0.02954	0.01996	0.0256	0.01972	0.01258	-0.00124		0.0701	0.0865	0.0415	0.0338	0.0322	0.0462	0.0273	0.0199		-0.00469	-0.01283	-0.01196	-0.01384	-0.0066	-0.02648	-0.01472	-0.02114		2.19961e-05	0.000164609	0.000143042	0.000191546	4.356e-05	0.00070119	0.000216678	0.0004469
13.4	0.08311	0.08617	0.03114	0.02486	0.02465	0.02162	0.01458	0.01201		0.0703	0.0875	0.0419	0.0397	0.0354	0.0496	0.0285	0.0213		0.01281	-0.00133	-0.01076	-0.01484	-0.01075	-0.02798	-0.01392	-0.00929		0.000164096	1.7689e-06	0.000115778	0.000220226	0.000115563	0.00078288	0.000193766	8.63041e-05
13.6	0.09356	0.10002	0.03409	0.02051	0.02425	0.02432	0.01683	0.01401		0.0704	0.0878	0.0446	0.0382	0.0388	0.0509	0.0311	0.0236		0.02316	0.01222	-0.01051	-0.01769	-0.01455	-0.02658	-0.01427	-0.00959		0.000536386	0.000149328	0.00011046	0.000312936	0.000211703	0.000706496	0.000203633	9.19681e-05
13.8	0.09211	0.11207	0.03734	0.02026	0.0322	0.03217	0.01813	0.01666		0.0711	0.088	0.0457	0.0371	0.0371	0.0494	0.035	0.0238		0.02101	0.02407	-0.00836	-0.01684	-0.0049	-0.01723	-0.01687	-0.00714		0.00044142	0.000579365	6.98896e-05	0.000283586	2.401e-05	0.000296873	0.000284597	5.09796e-05
14	0.08721	0.10767	0.03649	0.02336	0.02875	0.03472	0.01658	0.01921		0.0689	0.0893	0.0459	0.0392	0.0369	0.0516	0.0342	0.0183		0.01831	0.01837	-0.00941	-0.01584	-0.00815	-0.01688	-0.01762	0.00091		0.000335256	0.000337457	8.85481e-05	0.000250906	6.64225e-05	0.000284934	0.000310464	8.281e-07
14.2	0.08866	0.08122	0.03739	0.02111	0.032	0.03662	0.02648	0.01711		0.0716	0.0916	0.0478	0.0377	0.0372	0.0522	0.0359	0.0204		0.01706	-0.01038	-0.01041	-0.01659	-0.0052	-0.01558	-0.00942	-0.00329		0.000291044	0.000107744	0.000108368	0.000275228	2.704e-05	0.000242736	8.87364e-05	1.08241e-05
14.4	0.06751	0.05867	0.03899	0.02611	0.0382	0.03537	0.03343	0.01686		0.0745	0.0919	0.0478	0.0379	0.0392	0.0524	0.0355	0.0207		-0.00699	-0.03323	-0.00881	-0.01179	-0.001	-0.01703	-0.00207	-0.00384		4.88601e-05	0.00110423	7.76161e-05	0.000139004	1e-06	0.000290021	4.2849e-06	1.47456e-05
14.6	0.07586	0.06127	0.03879	0.02996	0.04085	0.03697	0.02658	0.01986		0.0739	0.091	0.047	0.039	0.0389	0.0537	0.0341	0.021		0.00196	-0.02973	-0.00821	-0.00904	0.00195	-0.01673	-0.00752	-0.00114		3.8416e-06	0.000883873	6.74041e-05	8.17216e-05	3.8025e-06	0.000279893	5.65504e-05	1.2996e-06
14.8	0.07081	0.06082	0.03624	0.02856	0.0364	0.04277	0.02558	0.02331		0.0737	0.0901	0.046	0.043	0.04	0.0534	0.0362	0.0211		-0.00289	-0.02928	-0.00976	-0.01444	-0.0036	-0.01063	-0.01062	0.00221		8.3521e-06	0.000857318	9.52576e-05	0.000208514	1.296e-05	0.000112997	0.000112784	4.8841e-06
15	0.05986	0.06542	0.03179	0.03486	0.04535	0.05187	0.03303	0.02011		0.0732	0.0918	0.0469	0.0441	0.0423	0.0535	0.0386	0.0207		-0.01334	-0.02638	-0.01511	-0.00924	0.00305	-0.00163	-0.00557	-0.00059		0.000177956	0.000695904	0.000228312	8.53776e-05	9.3025e-06	2.6569e-06	3.10249e-05	3.481e-07
15.2	0.05676	0.06552	0.03439	0.02776	0.04495	0.04847	0.03698	0.01876		0.073	0.0942	0.0472	0.0437	0.0426	0.0527	0.0405	0.0217		-0.01624	-0.02868	-0.01281	-0.01594	0.00235	-0.00423	-0.00352	-0.00294		0.000263738	0.000822542	0.000164096	0.000254084	5.5225e-06	1.78929e-05	1.23904e-05	8.6436e-06
15.4	0.05421	0.06997	0.03574	0.03796	0.0441	0.04777	0.03878	0.02191		0.0764	0.0942	0.0486	0.0436	0.0421	0.0527	0.0418	0.0225		-0.02219	-0.02423	-0.01286	-0.00564	0.002	-0.00493	-0.00302	-0.00059		0.000492396	0.000587093	0.00016538	3.18096e-05	4e-06	2.43049e-05	9.1204e-06	3.481e-07
15.6	0.05036	0.06872	0.03814	0.04091	0.0384	0.04587	0.03318	0.02261		0.0774	0.0928	0.0487	0.0439	0.0415	0.053	0.0434	0.022		-0.02704	-0.02408	-0.01056	-0.00299	-0.0031	-0.00713	-0.01022	0.00061		0.000731162	0.000579846	0.000111514	8.9401e-06	9.61e-06	5.08369e-05	0.000104448	3.721e-07
15.8	0.06066	0.07227	0.04424	0.03876	0.04365	0.04272	0.03988	0.02541		0.0764	0.0916	0.0506	0.0441	0.0419	0.0544	0.0431	0.0235		-0.01574	-0.01933	-0.00636	-0.00534	0.00175	-0.01168	-0.00322	0.00191		0.000247748	0.000373649	4.04496e-05	2.85156e-05	3.0625e-06	0.000136422	1.03684e-05	3.6481e-06
16	0.06731	0.07332	0.03969	0.04041	0.0455	0.04337	0.03938	0.02546		0.0756	0.0931	0.0515	0.0453	0.0432	0.0545	0.0433	0.0245		-0.00829	-0.01978	-0.01181	-0.00489	0.0023	-0.01113	-0.00392	0.00096		6.87241e-05	0.000391248	0.000139476	2.39121e-05	5.29e-06	0.000123877	1.53664e-05	9.216e-07
16.2	0.06436	0.06372	0.04259	0.03921	0.0442	0.04602	0.04133	0.03281		0.0755	0.0923	0.0513	0.0462	0.044	0.0547	0.0443	0.025		-0.01114	-0.02858	-0.00871	-0.00699	0.0002	-0.00868	-0.00297	0.00781		0.0001241	0.000816816	7.58641e-05	4.88601e-05	4e-08	7.53424e-05	8.8209e-06	6.09961e-05
16.4	0.06821	0.07677	0.04159	0.04831	0.0434	0.04847	0.03748	0.03076		0.0757	0.0899	0.0509	0.0463	0.0439	0.0544	0.0447	0.0252		-0.00749	-0.01313	-0.00931	0.00201	-0.0005	-0.00593	-0.00722	0.00556		5.61001e-05	0.000172397	8.66761e-05	4.0401e-06	2.5e-07	3.51649e-05	5.21284e-05	3.09136e-05
16.6	0.06966	0.08267	0.04069	0.04286	0.0529	0.05132	0.03973	0.02791		0.0739	0.0899	0.0502	0.0468	0.0442	0.0543	0.0447	0.0248		-0.00424	-0.00723	-0.00951	-0.00394	0.0087	-0.00298	-0.00497	0.00311		1.79776e-05	5.22729e-05	9.04401e-05	1.55236e-05	7.569e-05	8.8804e-06	2.47009e-05	9.6721e-06
16.8	0.07811	0.07867	0.04249	0.04676	0.05315	0.04997	0.03463	0.02311		0.0732	0.0895	0.0498	0.0465	0.0446	0.0541	0.0449	0.0245		0.00491	-0.01083	-0.00731	0.00026	0.00855	-0.00413	-0.01027	-0.00139		2.41081e-05	0.000117289	5.34361e-05	6.76e-08	7.31025e-05	1.70569e-05	0.000105473	1.9321e-06
17	0.08626	0.08157	0.03964	0.05101	0.0476	0.05247	0.04443	0.02456		0.0751	0.0886	0.05	0.0452	0.0449	0.0533	0.0453	0.025		0.01116	-0.00703	-0.01036	0.00581	0.0027	-0.00083	-0.00087	-0.00044		0.000124546	4.94209e-05	0.00010733	3.37561e-05	7.29e-06	6.889e-07	7.569e-07	1.936e-07
17.2	0.08441	0.08422	0.03949	0.04191	0.04965	0.04977	0.04223	0.02706		0.0727	0.0882	0.0493	0.0454	0.0438	0.0528	0.0462	0.0254		0.01171	-0.00398	-0.00981	-0.00349	0.00585	-0.00303	-0.00397	0.00166		0.000137124	1.58404e-05	9.62361e-05	1.21801e-05	3.42225e-05	9.1809e-06	1.57609e-05	2.7556e-06
17.4	0.08701	0.08477	0.03994	0.04271	0.0484	0.05367	0.04253	0.02731		0.0718	0.0863	0.0499	0.0458	0.0431	0.0536	0.0466	0.0254		0.01521	-0.00153	-0.00996	-0.00309	0.0053	7e-05	-0.00407	0.00191		0.000231344	2.3409e-06	9.92016e-05	9.5481e-06	2.809e-05	4.9e-09	1.65649e-05	3.6481e-06
17.6	0.07881	0.08287	0.03749	0.03821	0.04505	0.05327	0.04738	0.03041		0.0714	0.0856	0.0503	0.046	0.0433	0.0528	0.047	0.0252		0.00741	-0.00273	-0.01281	-0.00779	0.00175	0.00047	0.00038	0.00521		5.49081e-05	7.4529e-06	0.000164096	6.06841e-05	3.0625e-06	2.209e-07	1.444e-07	2.71441e-05
17.8	0.07731	0.08347	0.03819	0.04576	0.0425	0.05247	0.04328	0.03136		0.0702	0.0849	0.0499	0.0457	0.0426	0.0529	0.0461	0.0252		0.00711	-0.00143	-0.01171	6e-05	-0.0001	-0.00043	-0.00282	0.00616		5.05521e-05	2.0449e-06	0.000137124	3.6e-09	1e-08	1.849e-07	7.9524e-06	3.79456e-05
18	0.07666	0.08562	0.03779	0.04756	0.0511	0.05212	0.04523	0.02721		0.0691	0.0853	0.05	0.0454	0.0417	0.0528	0.0457	0.0255		0.00756	0.00032	-0.01221	0.00216	0.0094	-0.00068	-0.00047	0.00171		5.71536e-05	1.024e-07	0.000149084	4.6656e-06	8.836e-05	4.624e-07	2.209e-07	2.9241e-06
18.2	0.07911	0.08342	0.03909	0.04761	0.051	0.05922	0.03873	0.02861		0.0689	0.0842	0.0506	0.0457	0.0421	0.0522	0.046	0.0249		0.01021	-0.00078	-0.01151	0.00191	0.0089	0.00702	-0.00727	0.00371		0.000104244	6.084e-07	0.00013248	3.6481e-06	7.921e-05	4.92804e-05	5.28529e-05	1.37641e-05
18.4	0.07806	0.07852	0.03529	0.04041	0.0569	0.05532	0.04853	0.02506		0.0688	0.0827	0.0503	0.0453	0.0422	0.052	0.046	0.0247		0.00926	-0.00418	-0.01501	-0.00489	0.0147	0.00332	0.00253	0.00036		8.57476e-05	1.74724e-05	0.0002253	2.39121e-05	0.00021609	1.10224e-05	6.4009e-06	1.296e-07
18.6	0.07841	0.07867	0.03644	0.05411	0.04695	0.05227	0.04578	0.02576		0.0681	0.0814	0.0498	0.0445	0.0418	0.0523	0.0459	0.025		0.01031	-0.00273	-0.01336	0.00961	0.00515	-3e-05	-0.00012	0.00076		0.000106296	7.4529e-06	0.00017849	9.23521e-05	2.65225e-05	9e-10	1.44e-08	5.776e-07
18.8	0.08076	0.08132	0.03479	0.04241	0.05105	0.05247	0.04353	0.02801		0.0679	0.08	0.049	0.0447	0.0415	0.0522	0.0462	0.0253		0.01286	0.00132	-0.01421	-0.00229	0.00955	0.00027	-0.00267	0.00271		0.00016538	1.7424e-06	0.000201924	5.2441e-06	9.12025e-05	7.29e-08	7.1289e-06	7.3441e-06
19	0.07706	0.08272	0.03654	0.04636	0.0543	0.06187	0.04563	0.02926		0.0682	0.0792	0.0483	0.0445	0.0418	0.0515	0.046	0.0226		0.00886	0.00352	-0.01176	0.00186	0.0125	0.01037	-0.00037	0.00666		7.84996e-05	1.23904e-05	0.000138298	3.4596e-06	0.00015625	0.000107537	1.369e-07	4.43556e-05
19.2	0.07726	0.07862	0.03274	0.04636	0.0486	0.06807	0.05043	0.02821		0.0672	0.0784	0.049	0.0446	0.0413	0.051	0.0457	0.0227		0.01006	0.00022	-0.01626	0.00176	0.0073	0.01707	0.00473	0.00551		0.000101204	4.84e-08	0.000264388	3.0976e-06	5.329e-05	0.000291385	2.23729e-05	3.03601e-05
19.4	0.07906	0.07647	0.03329	0.03971	0.0493	0.05462	0.04203	0.02636		0.0664	0.0782	0.0496	0.0444	0.0414	0.0505	0.0456	0.0242		0.01266	-0.00173	-0.01631	-0.00469	0.0079	0.00412	-0.00357	0.00216		0.000160276	2.9929e-06	0.000266016	2.19961e-05	6.241e-05	1.69744e-05	1.27449e-05	4.6656e-06
19.6	0.07561	0.08287	0.03539	0.04016	0.054	0.04997	0.04878	0.02656		0.0663	0.0776	0.0495	0.0444	0.0412	0.0503	0.0456	0.0258		0.00931	0.00527	-0.01411	-0.00424	0.0128	-0.00033	0.00318	0.00076		8.66761e-05	2.77729e-05	0.000199092	1.79776e-05	0.00016384	1.089e-07	1.01124e-05	5.776e-07
19.8	0.06921	0.08357	0.03439	0.05011	0.05205	0.05162	0.03913	0.02651		0.067	0.0773	0.0487	0.0446	0.0411	0.0501	0.0457	0.0254		0.00221	0.00627	-0.01431	0.00551	0.01095	0.00152	-0.00657	0.00111		4.8841e-06	3.93129e-05	0.000204776	3.03601e-05	0.000119903	2.3104e-06	4.31649e-05	1.2321e-06
20	0.07251	0.07517	0.03359	0.04581	0.0475	0.06012	0.04643	0.02841		0.0657	0.0766	0.0485	0.0448	0.041	0.0503	0.0458	0.0205		0.00681	-0.00143	-0.01491	0.00101	0.0065	0.00982	0.00063	0.00791		4.63761e-05	2.0449e-06	0.000222308	1.0201e-06	4.225e-05	9.64324e-05	3.969e-07	6.25681e-05
20.2	0.07461	0.07322	0.03374	0.04361	0.04805	0.05912	0.04088	0.02961		0.0655	0.0769	0.0491	0.0449	0.0408	0.0505	0.0459	0.0223		0.00911	-0.00368	-0.01536	-0.00129	0.00725	0.00862	-0.00502	0.00731		8.29921e-05	1.35424e-05	0.00023593	1.6641e-06	5.25625e-05	7.43044e-05	2.52004e-05	5.34361e-05
20.4	0.07411	0.07272	0.03259	0.04481	0.04695	0.05577	0.04968	0.02836		0.0643	0.0768	0.0496	0.0447	0.0409	0.0507	0.0456	0.0253		0.00981	-0.00408	-0.01701	0.00011	0.00605	0.00507	0.00408	0.00306		9.62361e-05	1.66464e-05	0.00028934	1.21e-08	3.66025e-05	2.57049e-05	1.66464e-05	9.3636e-06
20.6	0.07051	0.06922	0.03459	0.04176	0.0447	0.05437	0.04268	0.02691		0.0649	0.0763	0.0488	0.0442	0.0409	0.0506	0.0454	0.0247		0.00561	-0.00708	-0.01421	-0.00244	0.0038	0.00377	-0.00272	0.00221		3.14721e-05	5.01264e-05	0.000201924	5.9536e-06	1.444e-05	1.42129e-05	7.3984e-06	4.8841e-06
20.8	0.07006	0.07247	0.03779	0.04531	0.04605	0.05012	0.03968	0.02541		0.0639	0.0759	0.047	0.0438	0.0407	0.05	0.0453	0.0212		0.00616	-0.00343	-0.00921	0.00151	0.00535	0.00012	-0.00562	0.00421		3.79456e-05	1.17649e-05	8.48241e-05	2.2801e-06	2.86225e-05	1.44e-08	3.15844e-05	1.77241e-05
21	0.07141	0.06942	0.03589	0.04281	0.04915	0.04652	0.04328	0.02396		0.0636	0.0755	0.0464	0.0437	0.0405	0.0495	0.0454	0.0215		0.00781	-0.00608	-0.01051	-0.00089	0.00865	-0.00298	-0.00212	0.00246		6.09961e-05	3.69664e-05	0.00011046	7.921e-07	7.48225e-05	8.8804e-06	4.4944e-06	6.0516e-06
21.2	0.06961	0.07017	0.03404	0.04411	0.0502	0.05617	0.03663	0.02631		0.0629	0.0751	0.047	0.0439	0.0406	0.0489	0.0454	0.0244		0.00671	-0.00493	-0.01296	0.00021	0.0096	0.00727	-0.00877	0.00191		4.50241e-05	2.43049e-05	0.000167962	4.41e-08	9.216e-05	5.28529e-05	7.69129e-05	3.6481e-06
21.4	0.06981	0.07657	0.03364	0.03941	0.05025	0.05207	0.04488	0.02836		0.063	0.0753	0.0474	0.0435	0.0402	0.0485	0.045	0.0246		0.00681	0.00127	-0.01376	-0.00409	0.01005	0.00357	-0.00012	0.00376		4.63761e-05	1.6129e-06	0.000189338	1.67281e-05	0.000101003	1.27449e-05	1.44e-08	1.41376e-05
21.6	0.07291	0.08447	0.03209	0.04501	0.04885	0.04987	0.04598	0.02801		0.0624	0.0748	0.0466	0.0431	0.0398	0.0483	0.0448	0.0207		0.01051	0.00967	-0.01451	0.00191	0.00905	0.00157	0.00118	0.00731		0.00011046	9.35089e-05	0.00021054	3.6481e-06	8.19025e-05	2.4649e-06	1.3924e-06	5.34361e-05
21.8	0.06981	0.07972	0.03409	0.04036	0.0446	0.05502	0.04103	0.02611		0.062	0.0735	0.0461	0.0428	0.0395	0.0487	0.0447	0.0216		0.00781	0.00622	-0.01201	-0.00244	0.0051	0.00632	-0.00367	0.00451		6.09961e-05	3.86884e-05	0.00014424	5.9536e-06	2.601e-05	3.99424e-05	1.34689e-05	2.03401e-05
22	0.06906	0.07917	0.03089	0.04221	0.04585	0.05482	0.04388	0.02666		0.061	0.0732	0.0463	0.0429	0.0392	0.0488	0.0451	0.0241		0.00806	0.00597	-0.01541	-0.00069	0.00665	0.00602	-0.00122	0.00256		6.49636e-05	3.56409e-05	0.000237468	4.761e-07	4.42225e-05	3.62404e-05	1.4884e-06	6.5536e-06
22.2	0.06761	0.07577	0.03069	0.03986	0.0501	0.05122	0.03768	0.02606		0.0609	0.0731	0.0464	0.0426	0.0392	0.0487	0.0453	0.024		0.00671	0.00267	-0.01571	-0.00274	0.0109	0.00252	-0.00762	0.00206		4.50241e-05	7.1289e-06	0.000246804	7.5076e-06	0.00011881	6.3504e-06	5.80644e-05	4.2436e-06
22.4	0.07041	0.07037	0.03219	0.04101	0.0436	0.04952	0.04458	0.03166		0.0606	0.0732	0.0464	0.0425	0.039	0.0483	0.0449	0.0205		0.00981	-0.00283	-0.01421	-0.00149	0.0046	0.00122	-0.00032	0.01116		9.62361e-05	8.0089e-06	0.000201924	2.2201e-06	2.116e-05	1.4884e-06	1.024e-07	0.000124546
22.6	0.06881	0.07157	0.03089	0.04486	0.04545	0.05312	0.03978	0.02636		0.0601	0.0724	0.0455	0.0419	0.039	0.0475	0.0443	0.0205		0.00871	-0.00083	-0.01461	0.00296	0.00645	0.00562	-0.00452	0.00586		7.58641e-05	6.889e-07	0.000213452	8.7616e-06	4.16025e-05	3.15844e-05	2.04304e-05	3.43396e-05
22.8	0.06726	0.07132	0.02999	0.03686	0.0454	0.05347	0.04093	0.02656		0.06	0.0718	0.045	0.0417	0.0389	0.0467	0.0436	0.0235		0.00726	-0.00048	-0.01501	-0.00484	0.0065	0.00677	-0.00267	0.00306		5.27076e-05	2.304e-07	0.0002253	2.34256e-05	4.225e-05	4.58329e-05	7.1289e-06	9.3636e-06
23	0.06541	0.07512	0.03029	0.04761	0.0474	0.05477	0.03948	0.02391		0.0596	0.071	0.0449	0.042	0.0385	0.0462	0.0436	0.0238		0.00581	0.00412	-0.01461	0.00561	0.0089	0.00857	-0.00412	0.00011		3.37561e-05	1.69744e-05	0.000213452	3.14721e-05	7.921e-05	7.34449e-05	1.69744e-05	1.21e-08
23.2	0.06816	0.07192	0.03129	0.03671	0.0513	0.04967	0.04133	0.02721		0.0601	0.0707	0.045	0.042	0.0382	0.046	0.0438	0.0186		0.00806	0.00122	-0.01371	-0.00529	0.0131	0.00367	-0.00247	0.00861		6.49636e-05	1.4884e-06	0.000187964	2.79841e-05	0.00017161	1.34689e-05	6.1009e-06	7.41321e-05
23.4	0.06706	0.07177	0.03264	0.04291	0.04185	0.05122	0.04348	0.02741		0.0594	0.0704	0.045	0.0419	0.0378	0.0464	0.0438	0.0202		0.00766	0.00137	-0.01236	0.00101	0.00405	0.00482	-0.00032	0.00721		5.86756e-05	1.8769e-06	0.00015277	1.0201e-06	1.64025e-05	2.32324e-05	1.024e-07	5.19841e-05
23.6	0.06556	0.07472	0.03154	0.04106	0.04105	0.04547	0.03843	0.02836		0.0591	0.0698	0.0452	0.0412	0.0375	0.0474	0.0438	0.0238		0.00646	0.00492	-0.01366	-0.00014	0.00355	-0.00193	-0.00537	0.00456		4.17316e-05	2.42064e-05	0.000186596	1.96e-08	1.26025e-05	3.7249e-06	2.88369e-05	2.07936e-05
23.8	0.06931	0.07867	0.03239	0.03876	0.0415	0.04672	0.04058	0.02721		0.0585	0.0693	0.0454	0.0405	0.0374	0.0479	0.044	0.023		0.01081	0.00937	-0.01301	-0.00174	0.0041	-0.00118	-0.00342	0.00421		0.000116856	8.77969e-05	0.00016926	3.0276e-06	1.681e-05	1.3924e-06	1.16964e-05	1.77241e-05
24	0.06516	0.07277	0.03154	0.04006	0.04555	0.04922	0.03828	0.02461		0.0583	0.0692	0.0451	0.0404	0.0375	0.0479	0.0441	0.019		0.00686	0.00357	-0.01356	-0.00034	0.00805	0.00132	-0.00582	0.00561		4.70596e-05	1.27449e-05	0.000183874	1.156e-07	6.48025e-05	1.7424e-06	3.38724e-05	3.14721e-05
24.2	0.06541	0.06802	0.03074	0.03906	0.0509	0.04892	0.04143	0.02436		0.058	0.0688	0.0443	0.0407	0.0377	0.0472	0.0438	0.0193		0.00741	-0.00078	-0.01356	-0.00164	0.0132	0.00172	-0.00237	0.00506		5.49081e-05	6.084e-07	0.000183874	2.6896e-06	0.00017424	2.9584e-06	5.6169e-06	2.56036e-05
24.4	0.06706	0.07067	0.03139	0.03961	0.04015	0.04947	0.04038	0.02646		0.0583	0.0682	0.0437	0.0412	0.0379	0.046	0.043	0.0223		0.00876	0.00247	-0.01231	-0.00159	0.00225	0.00347	-0.00262	0.00416		7.67376e-05	6.1009e-06	0.000151536	2.5281e-06	5.0625e-06	1.20409e-05	6.8644e-06	1.73056e-05
24.6	0.06921	0.06927	0.03174	0.04081	0.04155	0.04947	0.03693	0.02791		0.0579	0.068	0.0438	0.0411	0.0377	0.0452	0.0422	0.0232		0.01131	0.00127	-0.01206	-0.00029	0.00385	0.00427	-0.00527	0.00471		0.000127916	1.6129e-06	0.000145444	8.41e-08	1.48225e-05	1.82329e-05	2.77729e-05	2.21841e-05
24.8	0.06461	0.07117	0.03129	0.03836	0.03905	0.04907	0.04058	0.02486		0.0579	0.0674	0.0446	0.0406	0.0372	0.0445	0.0418	0.0221		0.00671	0.00377	-0.01331	-0.00224	0.00185	0.00457	-0.00122	0.00276		4.50241e-05	1.42129e-05	0.000177156	5.0176e-06	3.4225e-06	2.08849e-05	1.4884e-06	7.6176e-06
25	0.06586	0.06962	0.03109	0.03606	0.04335	0.04432	0.04208	0.02516		0.0575	0.0674	0.0452	0.0402	0.037	0.0444	0.0421	0.0184		0.00836	0.00222	-0.01411	-0.00414	0.00635	-8e-05	-2e-05	0.00676		6.98896e-05	4.9284e-06	0.000199092	1.71396e-05	4.03225e-05	6.4e-09	4e-10	4.56976e-05
25.2	0.06271	0.06442	0.03309	0.03996	0.04475	0.04727	0.03873	0.02496		0.0571	0.0672	0.0444	0.0402	0.0366	0.045	0.0428	0.0202		0.00561	-0.00278	-0.01131	-0.00024	0.00815	0.00227	-0.00407	0.00476		3.14721e-05	7.7284e-06	0.000127916	5.76e-08	6.64225e-05	5.1529e-06	1.65649e-05	2.26576e-05
25.4	0.06366	0.06572	0.03154	0.03616	0.0414	0.05037	0.03878	0.02496		0.0574	0.0667	0.044	0.0398	0.0364	0.0458	0.0432	0.0223		0.00626	-0.00098	-0.01246	-0.00364	0.005	0.00457	-0.00442	0.00266		3.91876e-05	9.604e-07	0.000155252	1.32496e-05	2.5e-05	2.08849e-05	1.95364e-05	7.0756e-06
25.6	0.06291	0.06462	0.03019	0.03946	0.04295	0.04717	0.04038	0.02716		0.057	0.0663	0.044	0.0395	0.0362	0.0459	0.043	0.0215		0.00591	-0.00168	-0.01381	-4e-05	0.00675	0.00127	-0.00262	0.00566		3.49281e-05	2.8224e-06	0.000190716	1.6e-09	4.55625e-05	1.6129e-06	6.8644e-06	3.20356e-05
25.8	0.06586	0.06857	0.03134	0.03446	0.0444	0.04312	0.03753	0.02371		0.0566	0.0654	0.0439	0.0396	0.0362	0.046	0.0425	0.0191		0.00926	0.00317	-0.01256	-0.00514	0.0082	-0.00288	-0.00497	0.00461		8.57476e-05	1.00489e-05	0.000157754	2.64196e-05	6.724e-05	8.2944e-06	2.47009e-05	2.12521e-05
26	0.06616	0.06957	0.03199	0.03601	0.0384	0.04022	0.03778	0.02631		0.0567	0.0657	0.0442	0.0397	0.0366	0.0455	0.042	0.022		0.00946	0.00387	-0.01221	-0.00369	0.0018	-0.00528	-0.00422	0.00431		8.94916e-05	1.49769e-05	0.000149084	1.36161e-05	3.24e-06	2.78784e-05	1.78084e-05	1.85761e-05
26.2	0.06071	0.06967	0.03084	0.03621	0.03635	0.04492	0.03953	0.02496		0.0561	0.0654	0.0441	0.0397	0.0366	0.0447	0.0414	0.0233		0.00461	0.00427	-0.01326	-0.00349	-0.00025	0.00022	-0.00187	0.00166		2.12521e-05	1.82329e-05	0.000175828	1.21801e-05	6.25e-08	4.84e-08	3.4969e-06	2.7556e-06
26.4	0.06276	0.07107	0.03059	0.03476	0.0376	0.04987	0.03623	0.02441		0.0562	0.065	0.0439	0.0397	0.0365	0.0446	0.0412	0.0215		0.00656	0.00607	-0.01331	-0.00494	0.0011	0.00527	-0.00497	0.00291		4.30336e-05	3.68449e-05	0.000177156	2.44036e-05	1.21e-06	2.77729e-05	2.47009e-05	8.4681e-06
26.6	0.06461	0.06337	0.03094	0.03766	0.0405	0.04397	0.03733	0.02451		0.0563	0.0645	0.0436	0.0394	0.0362	0.0443	0.0415	0.0179		0.00831	-0.00113	-0.01266	-0.00174	0.0043	-0.00033	-0.00417	0.00661		6.90561e-05	1.2769e-06	0.000160276	3.0276e-06	1.849e-05	1.089e-07	1.73889e-05	4.36921e-05
26.8	0.06291	0.06372	0.02989	0.03656	0.047	0.04287	0.03568	0.02191		0.0561	0.0646	0.0434	0.0395	0.0358	0.0443	0.0418	0.0197		0.00681	-0.00088	-0.01351	-0.00294	0.0112	-0.00143	-0.00612	0.00221		4.63761e-05	7.744e-07	0.00018252	8.6436e-06	0.00012544	2.0449e-06	3.74544e-05	4.8841e-06
27	0.05966	0.06822	0.03214	0.03841	0.0413	0.04377	0.03543	0.02221		0.0559	0.0646	0.0434	0.0395	0.0358	0.0443	0.0418	0.0222		0.00376	0.00362	-0.01126	-0.00109	0.0055	-0.00053	-0.00637	1e-05		1.41376e-05	1.31044e-05	0.000126788	1.1881e-06	3.025e-05	2.809e-07	4.05769e-05	1e-10
27.2	0.06446	0.06877	0.02984	0.03771	0.0394	0.04657	0.03998	0.02356		0.056	0.0646	0.0436	0.0394	0.0358	0.0443	0.0415	0.0178		0.00846	0.00417	-0.01376	-0.00169	0.0036	0.00227	-0.00152	0.00576		7.15716e-05	1.73889e-05	0.000189338	2.8561e-06	1.296e-05	5.1529e-06	2.3104e-06	3.31776e-05
27.4	0.06561	0.06682	0.03174	0.03806	0.03765	0.04262	0.03428	0.02361		0.0559	0.0641	0.0436	0.0392	0.0359	0.0443	0.0413	0.0184		0.00971	0.00272	-0.01186	-0.00114	0.00175	-0.00168	-0.00702	0.00521		9.42841e-05	7.3984e-06	0.00014066	1.2996e-06	3.0625e-06	2.8224e-06	4.92804e-05	2.71441e-05
27.6	0.06211	0.07087	0.03374	0.03861	0.0442	0.04192	0.04008	0.02441		0.0558	0.064	0.0436	0.0388	0.0357	0.0444	0.0412	0.0219		0.00631	0.00687	-0.00986	-0.00019	0.0085	-0.00248	-0.00112	0.00251		3.98161e-05	4.71969e-05	9.72196e-05	3.61e-08	7.225e-05	6.1504e-06	1.2544e-06	6.3001e-06
27.8	0.06216	0.06657	0.02934	0.03636	0.0425	0.04047	0.03368	0.02471		0.0557	0.0639	0.0434	0.0388	0.0356	0.0443	0.0413	0.0226		0.00646	0.00267	-0.01406	-0.00244	0.0069	-0.00383	-0.00762	0.00211		4.17316e-05	7.1289e-06	0.000197684	5.9536e-06	4.761e-05	1.46689e-05	5.80644e-05	4.4521e-06
28	0.06066	0.06622	0.03049	0.03886	0.04095	0.04487	0.03913	0.02276		0.0555	0.0637	0.0432	0.0392	0.0356	0.0443	0.0415	0.0204		0.00516	0.00252	-0.01271	-0.00034	0.00535	0.00057	-0.00237	0.00236		2.66256e-05	6.3504e-06	0.000161544	1.156e-07	2.86225e-05	3.249e-07	5.6169e-06	5.5696e-06
28.2	0.06221	0.06537	0.03129	0.03481	0.03705	0.04502	0.03293	0.02611		0.0555	0.0633	0.043	0.0391	0.0356	0.044	0.0412	0.0188		0.00671	0.00207	-0.01171	-0.00429	0.00145	0.00102	-0.00827	0.00731		4.50241e-05	4.2849e-06	0.000137124	1.84041e-05	2.1025e-06	1.0404e-06	6.83929e-05	5.34361e-05
28.4	0.06071	0.06457	0.03234	0.03716	0.03525	0.04107	0.04073	0.02276		0.0553	0.063	0.043	0.0391	0.0356	0.0439	0.0407	0.0206		0.00541	0.00157	-0.01066	-0.00194	-0.00035	-0.00283	3e-05	0.00216		2.92681e-05	2.4649e-06	0.000113636	3.7636e-06	1.225e-07	8.0089e-06	9e-10	4.6656e-06
28.6	0.06111	0.06277	0.03239	0.03946	0.0409	0.04297	0.03578	0.02521		0.0551	0.063	0.0431	0.0387	0.0354	0.0437	0.0407	0.0233		0.00601	-0.00023	-0.01071	0.00076	0.0055	-0.00073	-0.00492	0.00191		3.61201e-05	5.29e-08	0.000114704	5.776e-07	3.025e-05	5.329e-07	2.42064e-05	3.6481e-06
28.8	0.06111	0.05982	0.02999	0.03326	0.0371	0.04502	0.03608	0.02321		0.0548	0.0631	0.043	0.0386	0.0355	0.0437	0.041	0.0215		0.00631	-0.00328	-0.01301	-0.00534	0.0016	0.00132	-0.00492	0.00171		3.98161e-05	1.07584e-05	0.00016926	2.85156e-05	2.56e-06	1.7424e-06	2.42064e-05	2.9241e-06
29	0.06246	0.06117	0.02999	0.03876	0.03765	0.04407	0.03348	0.02311		0.0549	0.0631	0.0429	0.0385	0.0352	0.0438	0.0411	0.0184		0.00756	-0.00193	-0.01291	0.00026	0.00245	0.00027	-0.00762	0.00471		5.71536e-05	3.7249e-06	0.000166668	6.76e-08	6.0025e-06	7.29e-08	5.80644e-05	2.21841e-05
29.2	0.05706	0.06727	0.03174	0.03406	0.0342	0.04207	0.03653	0.02496		0.055	0.0627	0.0427	0.0386	0.0352	0.0438	0.041	0.0194		0.00206	0.00457	-0.01096	-0.00454	-0.001	-0.00173	-0.00447	0.00556		4.2436e-06	2.08849e-05	0.000120122	2.06116e-05	1e-06	2.9929e-06	1.99809e-05	3.09136e-05
29.4	0.06121	0.06727	0.02949	0.03786	0.0358	0.04107	0.03613	0.02216		0.0549	0.0622	0.0425	0.0386	0.0351	0.0437	0.0406	0.0226		0.00631	0.00507	-0.01301	-0.00074	0.0007	-0.00263	-0.00447	-0.00044		3.98161e-05	2.57049e-05	0.00016926	5.476e-07	4.9e-07	6.9169e-06	1.99809e-05	1.936e-07
29.6	0.05911	0.06512	0.03379	0.03436	0.0394	0.04022	0.03458	0.02436		0.0547	0.0619	0.0424	0.0385	0.035	0.0436	0.0405	0.023		0.00441	0.00322	-0.00861	-0.00414	0.0044	-0.00338	-0.00592	0.00136		1.94481e-05	1.03684e-05	7.41321e-05	1.71396e-05	1.936e-05	1.14244e-05	3.50464e-05	1.8496e-06
29.8	0.06011	0.06682	0.03284	0.03486	0.0406	0.04437	0.03343	0.02131		0.0542	0.0621	0.0427	0.0385	0.0352	0.0435	0.0405	0.0212		0.00591	0.00472	-0.00986	-0.00364	0.0054	0.00087	-0.00707	0.00011		3.49281e-05	2.22784e-05	9.72196e-05	1.32496e-05	2.916e-05	7.569e-07	4.99849e-05	1.21e-08
30	0.05966	0.07052	0.02889	0.03951	0.04505	0.04197	0.03393	0.02361		0.0541	0.0619	0.0427	0.0383	0.0351	0.0433	0.0406	0.0179		0.00556	0.00862	-0.01381	0.00121	0.00995	-0.00133	-0.00667	0.00571		3.09136e-05	7.43044e-05	0.000190716	1.4641e-06	9.90025e-05	1.7689e-06	4.44889e-05	3.26041e-05
30.2	0.06161	0.07612	0.02794	0.03181	0.04165	0.03877	0.03548	0.02586		0.054	0.0618	0.0424	0.0383	0.035	0.0434	0.0405	0.0217		0.00761	0.01432	-0.01446	-0.00649	0.00665	-0.00463	-0.00502	0.00416		5.79121e-05	0.000205062	0.000209092	4.21201e-05	4.42225e-05	2.14369e-05	2.52004e-05	1.73056e-05
30.4	0.06101	0.06772	0.03264	0.03846	0.03925	0.04107	0.03428	0.02436		0.054	0.0612	0.0421	0.0381	0.0348	0.0433	0.0403	0.0223		0.00701	0.00652	-0.00946	0.00036	0.00445	-0.00223	-0.00602	0.00206		4.91401e-05	4.25104e-05	8.94916e-05	1.296e-07	1.98025e-05	4.9729e-06	3.62404e-05	4.2436e-06
30.6	0.05826	0.07232	0.03029	0.03391	0.041	0.04182	0.04083	0.02356		0.0537	0.0608	0.042	0.038	0.0347	0.0432	0.0402	0.0168		0.00456	0.01152	-0.01171	-0.00409	0.0063	-0.00138	0.00063	0.00676		2.07936e-05	0.00013271	0.000137124	1.67281e-05	3.969e-05	1.9044e-06	3.969e-07	4.56976e-05
30.8	0.06001	0.07132	0.03089	0.03396	0.03875	0.04072	0.02983	0.02346		0.0539	0.0602	0.0419	0.0379	0.0346	0.043	0.04	0.0183		0.00611	0.01112	-0.01101	-0.00394	0.00415	-0.00228	-0.01017	0.00516		3.73321e-05	0.000123654	0.00012122	1.55236e-05	1.72225e-05	5.1984e-06	0.000103429	2.66256e-05
31	0.05866	0.07052	0.02904	0.03381	0.03685	0.04342	0.03828	0.02376		0.0536	0.0605	0.0418	0.0378	0.0346	0.0429	0.0399	0.0202		0.00506	0.01002	-0.01276	-0.00399	0.00225	0.00052	-0.00162	0.00356		2.56036e-05	0.0001004	0.000162818	1.59201e-05	5.0625e-06	2.704e-07	2.6244e-06	1.26736e-05
31.2	0.05781	0.07362	0.02839	0.03061	0.0382	0.04752	0.02913	0.02351		0.0537	0.0601	0.0418	0.0376	0.0345	0.0427	0.0398	0.0226		0.00411	0.01352	-0.01341	-0.00699	0.0037	0.00482	-0.01067	0.00091		1.68921e-05	0.00018279	0.000179828	4.88601e-05	1.369e-05	2.32324e-05	0.000113849	8.281e-07
31.4	0.05936	0.07617	0.02894	0.03806	0.0407	0.04087	0.03713	0.02391		0.0536	0.0599	0.0419	0.0376	0.0344	0.0425	0.0398	0.0209		0.00576	0.01627	-0.01296	0.00046	0.0063	-0.00163	-0.00267	0.00301		3.31776e-05	0.000264713	0.000167962	2.116e-07	3.969e-05	2.6569e-06	7.1289e-06	9.0601e-06
31.6	0.05861	0.06992	0.02784	0.03126	0.04035	0.03712	0.03233	0.02171		0.0534	0.0595	0.0417	0.0376	0.0342	0.0424	0.0398	0.0178		0.00521	0.01042	-0.01386	-0.00634	0.00615	-0.00528	-0.00747	0.00391		2.71441e-05	0.000108576	0.0001921	4.01956e-05	3.78225e-05	2.78784e-05	5.58009e-05	1.52881e-05
31.8	0.05646	0.07137	0.02949	0.03446	0.04045	0.03722	0.02918	0.02281		0.0529	0.0592	0.0418	0.0376	0.0342	0.0426	0.0397	0.0199		0.00356	0.01217	-0.01231	-0.00314	0.00625	-0.00538	-0.01052	0.00291		1.26736e-05	0.000148109	0.000151536	9.8596e-06	3.90625e-05	2.89444e-05	0.00011067	8.4681e-06
32	0.05936	0.07292	0.02984	0.03631	0.03635	0.04052	0.03813	0.02256		0.0526	0.0593	0.0417	0.0375	0.0343	0.0424	0.0397	0.0227		0.00676	0.01362	-0.01186	-0.00119	0.00205	-0.00188	-0.00157	-0.00014		4.56976e-05	0.000185504	0.00014066	1.4161e-06	4.2025e-06	3.5344e-06	2.4649e-06	1.96e-08
32.2	0.05726	0.06657	0.02979	0.03276	0.03975	0.04292	0.03138	0.02606		0.0525	0.0587	0.0415	0.0375	0.0343	0.0424	0.0394	0.0218		0.00476	0.00787	-0.01171	-0.00474	0.00545	0.00052	-0.00802	0.00426		2.26576e-05	6.19369e-05	0.000137124	2.24676e-05	2.97025e-05	2.704e-07	6.43204e-05	1.81476e-05
32.4	0.05766	0.06392	0.02984	0.03556	0.0365	0.04242	0.03693	0.02411		0.0524	0.0585	0.0413	0.0374	0.0344	0.0422	0.0394	0.0176		0.00526	0.00542	-0.01146	-0.00184	0.0021	0.00022	-0.00247	0.00651		2.76676e-05	2.93764e-05	0.000131332	3.3856e-06	4.41e-06	4.84e-08	6.1009e-06	4.23801e-05
32.6	0.05781	0.06422	0.03064	0.03301	0.039	0.03887	0.03263	0.02371		0.0519	0.0582	0.041	0.0372	0.0343	0.042	0.0392	0.0191		0.00591	0.00602	-0.01036	-0.00419	0.0047	-0.00313	-0.00657	0.00461		3.49281e-05	3.62404e-05	0.00010733	1.75561e-05	2.209e-05	9.7969e-06	4.31649e-05	2.12521e-05
32.8	0.05606	0.06102	0.03024	0.03281	0.0426	0.03952	0.03323	0.02281		0.0516	0.0579	0.0412	0.0372	0.0342	0.0418	0.0391	0.0222		0.00446	0.00312	-0.01096	-0.00439	0.0084	-0.00228	-0.00587	0.00061		1.98916e-05	9.7344e-06	0.000120122	1.92721e-05	7.056e-05	5.1984e-06	3.44569e-05	3.721e-07
33	0.05911	0.05952	0.03084	0.03396	0.0392	0.03977	0.03233	0.02136		0.0513	0.0581	0.0411	0.037	0.034	0.0416	0.0391	0.0211		0.00781	0.00142	-0.01026	-0.00304	0.0052	-0.00183	-0.00677	0.00026		6.09961e-05	2.0164e-06	0.000105268	9.2416e-06	2.704e-05	3.3489e-06	4.58329e-05	6.76e-08
33.2	0.05706	0.05987	0.02869	0.03316	0.0393	0.04342	0.03408	0.02596		0.0514	0.0578	0.0407	0.037	0.0338	0.0414	0.0389	0.0195		0.00566	0.00207	-0.01201	-0.00384	0.0055	0.00202	-0.00482	0.00646		3.20356e-05	4.2849e-06	0.00014424	1.47456e-05	3.025e-05	4.0804e-06	2.32324e-05	4.17316e-05
33.4	0.05566	0.05787	0.02819	0.03431	0.0389	0.03677	0.03443	0.02316		0.0513	0.0578	0.0403	0.0368	0.0336	0.0413	0.0388	0.0175		0.00436	7e-05	-0.01211	-0.00249	0.0053	-0.00453	-0.00437	0.00566		1.90096e-05	4.9e-09	0.000146652	6.2001e-06	2.809e-05	2.05209e-05	1.90969e-05	3.20356e-05
33.6	0.05606	0.05802	0.02864	0.02896	0.0377	0.04067	0.03203	0.02311		0.0509	0.0575	0.04	0.0367	0.0335	0.0412	0.0387	0.0211		0.00516	0.00052	-0.01136	-0.00774	0.0042	-0.00053	-0.00667	0.00201		2.66256e-05	2.704e-07	0.00012905	5.99076e-05	1.764e-05	2.809e-07	4.44889e-05	4.0401e-06
33.8	0.05616	0.05917	0.02969	0.03311	0.0391	0.03682	0.03008	0.02276		0.0507	0.0569	0.0401	0.0366	0.0334	0.0412	0.0387	0.0222		0.00546	0.00227	-0.01041	-0.00349	0.0057	-0.00438	-0.00862	0.00056		2.98116e-05	5.1529e-06	0.000108368	1.21801e-05	3.249e-05	1.91844e-05	7.43044e-05	3.136e-07
34	0.05671	0.06047	0.03054	0.03286	0.0429	0.03922	0.03838	0.02316		0.0504	0.057	0.0402	0.0365	0.0333	0.0411	0.0385	0.0176		0.00631	0.00347	-0.00966	-0.00364	0.0096	-0.00188	-0.00012	0.00556		3.98161e-05	1.20409e-05	9.33156e-05	1.32496e-05	9.216e-05	3.5344e-06	1.44e-08	3.09136e-05
34.2	0.05486	0.05972	0.02864	0.03146	0.0395	0.03892	0.02863	0.02171		0.0503	0.0571	0.0401	0.0364	0.0333	0.041	0.0384	0.0185		0.00456	0.00262	-0.01146	-0.00494	0.0062	-0.00208	-0.00977	0.00321		2.07936e-05	6.8644e-06	0.000131332	2.44036e-05	3.844e-05	4.3264e-06	9.54529e-05	1.03041e-05
34.4	0.05591	0.05852	0.02769	0.03331	0.0366	0.03942	0.03468	0.02446		0.05	0.0564	0.0397	0.0363	0.0331	0.0408	0.0383	0.0193		0.00591	0.00212	-0.01201	-0.00299	0.0035	-0.00138	-0.00362	0.00516		3.49281e-05	4.4944e-06	0.00014424	8.9401e-06	1.225e-05	1.9044e-06	1.31044e-05	2.66256e-05
34.6	0.05341	0.05747	0.02889	0.03051	0.03725	0.04417	0.03183	0.02241		0.0498	0.0559	0.0393	0.0361	0.0329	0.0407	0.0381	0.0195		0.00361	0.00157	-0.01041	-0.00559	0.00435	0.00347	-0.00627	0.00291		1.30321e-05	2.4649e-06	0.000108368	3.12481e-05	1.89225e-05	1.20409e-05	3.93129e-05	8.4681e-06
34.8	0.05356	0.05652	0.02864	0.03361	0.0397	0.03727	0.03123	0.02036		0.0498	0.0558	0.0393	0.0361	0.0329	0.0406	0.038	0.0195		0.00376	0.00072	-0.01066	-0.00249	0.0068	-0.00333	-0.00677	0.00086		1.41376e-05	5.184e-07	0.000113636	6.2001e-06	4.624e-05	1.10889e-05	4.58329e-05	7.396e-07
35	0.05476	0.05482	0.02704	0.02651	0.04025	0.03922	0.03588	0.02171		0.0492	0.0556	0.0394	0.0362	0.0328	0.0404	0.038	0.0206		0.00556	-0.00078	-0.01236	-0.00969	0.00745	-0.00118	-0.00212	0.00111		3.09136e-05	6.084e-07	0.00015277	9.38961e-05	5.55025e-05	1.3924e-06	4.4944e-06	1.2321e-06
35.2	0.05366	0.05547	0.02954	0.03546	0.0382	0.03662	0.02703	0.02286		0.0495	0.0555	0.0395	0.036	0.0327	0.0402	0.0379	0.0217		0.00416	-3e-05	-0.00996	-0.00054	0.0055	-0.00358	-0.01087	0.00116		1.73056e-05	9e-10	9.92016e-05	2.916e-07	3.025e-05	1.28164e-05	0.000118157	1.3456e-06
35.4	0.05456	0.05482	0.03084	0.03031	0.04155	0.03972	0.03533	0.02326		0.049	0.0553	0.039	0.0359	0.0326	0.04	0.0377	0.0174		0.00556	-0.00048	-0.00816	-0.00559	0.00895	-0.00028	-0.00237	0.00586		3.09136e-05	2.304e-07	6.65856e-05	3.12481e-05	8.01025e-05	7.84e-08	5.6169e-06	3.43396e-05
35.6	0.05421	0.05647	0.03009	0.03031	0.03455	0.03802	0.03248	0.02221		0.0489	0.0553	0.0388	0.0357	0.0324	0.04	0.0375	0.0156		0.00531	0.00117	-0.00871	-0.00539	0.00215	-0.00198	-0.00502	0.00661		2.81961e-05	1.3689e-06	7.58641e-05	2.90521e-05	4.6225e-06	3.9204e-06	2.52004e-05	4.36921e-05
35.8	0.05401	0.05667	0.02969	0.03036	0.0313	0.04117	0.03283	0.01891		0.0487	0.0549	0.0386	0.0355	0.0324	0.0398	0.0375	0.0192		0.00531	0.00177	-0.00891	-0.00514	-0.0011	0.00137	-0.00467	-0.00029		2.81961e-05	3.1329e-06	7.93881e-05	2.64196e-05	1.21e-06	1.8769e-06	2.18089e-05	8.41e-08
36	0.05351	0.05817	0.02669	0.02736	0.0355	0.04097	0.03093	0.02306		0.0482	0.0545	0.0386	0.0353	0.0323	0.0397	0.0374	0.0219		0.00531	0.00367	-0.01191	-0.00794	0.0032	0.00127	-0.00647	0.00116		2.81961e-05	1.34689e-05	0.000141848	6.30436e-05	1.024e-05	1.6129e-06	4.18609e-05	1.3456e-06
36.2	0.05301	0.05837	0.02724	0.03006	0.0365	0.03422	0.03173	0.02161		0.0481	0.0538	0.0387	0.0353	0.0321	0.0396	0.0373	0.0206		0.00491	0.00457	-0.01146	-0.00524	0.0044	-0.00538	-0.00557	0.00101		2.41081e-05	2.08849e-05	0.000131332	2.74576e-05	1.936e-05	2.89444e-05	3.10249e-05	1.0201e-06
36.4	0.05176	0.05667	0.02779	0.03121	0.03755	0.03602	0.03103	0.02226		0.0477	0.0532	0.0384	0.0352	0.032	0.0394	0.0371	0.0185		0.00406	0.00347	-0.01061	-0.00399	0.00555	-0.00338	-0.00607	0.00376		1.64836e-05	1.20409e-05	0.000112572	1.59201e-05	3.08025e-05	1.14244e-05	3.68449e-05	1.41376e-05
36.6	0.05281	0.05737	0.02914	0.03061	0.03965	0.03572	0.03368	0.02046		0.0473	0.0527	0.038	0.035	0.0318	0.0392	0.0367	0.0188		0.00551	0.00467	-0.00886	-0.00439	0.00785	-0.00348	-0.00302	0.00166		3.03601e-05	2.18089e-05	7.84996e-05	1.92721e-05	6.16225e-05	1.21104e-05	9.1204e-06	2.7556e-06
36.8	0.05096	0.05397	0.02829	0.02821	0.0418	0.03792	0.02778	0.02231		0.0466	0.0523	0.0378	0.0348	0.0316	0.0392	0.0368	0.0223		0.00436	0.00167	-0.00951	-0.00659	0.0102	-0.00128	-0.00902	1e-05		1.90096e-05	2.7889e-06	9.04401e-05	4.34281e-05	0.00010404	1.6384e-06	8.13604e-05	1e-10
37	0.05161	0.05692	0.03119	0.03001	0.04035	0.03852	0.03528	0.02341		0.0464	0.052	0.0379	0.0345	0.0315	0.039	0.0368	0.0219		0.00521	0.00492	-0.00671	-0.00449	0.00885	-0.00048	-0.00152	0.00151		2.71441e-05	2.42064e-05	4.50241e-05	2.01601e-05	7.83225e-05	2.304e-07	2.3104e-06	2.2801e-06
37.2	0.05136	0.05562	0.02674	0.02946	0.03655	0.03967	0.02833	0.02151		0.0459	0.0519	0.0379	0.0344	0.0312	0.0388	0.0368	0.0171		0.00546	0.00372	-0.01116	-0.00494	0.00535	0.00087	-0.00847	0.00441		2.98116e-05	1.38384e-05	0.000124546	2.44036e-05	2.86225e-05	7.569e-07	7.17409e-05	1.94481e-05
37.4	0.05211	0.05352	0.02724	0.02906	0.03165	0.04022	0.03183	0.02061		0.0458	0.052	0.0377	0.0342	0.031	0.0385	0.0364	0.0187		0.00631	0.00152	-0.01046	-0.00514	0.00065	0.00172	-0.00457	0.00191		3.98161e-05	2.3104e-06	0.000109412	2.64196e-05	4.225e-07	2.9584e-06	2.08849e-05	3.6481e-06
37.6	0.04886	0.05427	0.02629	0.02926	0.0303	0.03622	0.02833	0.02031		0.0457	0.0517	0.0372	0.034	0.0308	0.0383	0.0359	0.0224		0.00316	0.00257	-0.01091	-0.00474	-0.0005	-0.00208	-0.00757	-0.00209		9.9856e-06	6.6049e-06	0.000119028	2.24676e-05	2.5e-07	4.3264e-06	5.73049e-05	4.3681e-06
37.8	0.04936	0.05792	0.02549	0.02761	0.03255	0.04397	0.03038	0.02161		0.0456	0.0513	0.037	0.0339	0.0306	0.038	0.0356	0.0199		0.00376	0.00662	-0.01151	-0.00629	0.00195	0.00597	-0.00522	0.00171		1.41376e-05	4.38244e-05	0.00013248	3.95641e-05	3.8025e-06	3.56409e-05	2.72484e-05	2.9241e-06
38	0.05146	0.05577	0.02839	0.03071	0.0358	0.03782	0.03033	0.01976		0.0455	0.051	0.0369	0.0336	0.0305	0.0378	0.0355	0.0175		0.00596	0.00477	-0.00851	-0.00289	0.0053	2e-05	-0.00517	0.00226		3.55216e-05	2.27529e-05	7.24201e-05	8.3521e-06	2.809e-05	4e-10	2.67289e-05	5.1076e-06
38.2	0.05051	0.05482	0.02594	0.02916	0.0417	0.03412	0.02743	0.02036		0.0455	0.0512	0.0371	0.0335	0.0303	0.0378	0.0355	0.0159		0.00501	0.00362	-0.01116	-0.00434	0.0114	-0.00368	-0.00807	0.00446		2.51001e-05	1.31044e-05	0.000124546	1.88356e-05	0.00012996	1.35424e-05	6.51249e-05	1.98916e-05
38.4	0.04991	0.05397	0.02804	0.03106	0.04155	0.03232	0.03133	0.02236		0.045	0.0508	0.0371	0.0334	0.0301	0.0377	0.0355	0.0199		0.00491	0.00317	-0.00906	-0.00234	0.01145	-0.00538	-0.00417	0.00246		2.41081e-05	1.00489e-05	8.20836e-05	5.4756e-06	0.000131102	2.89444e-05	1.73889e-05	6.0516e-06
38.6	0.05086	0.05632	0.02604	0.02721	0.0383	0.03342	0.03173	0.02486		0.0447	0.0508	0.037	0.0333	0.03	0.0377	0.0354	0.0209		0.00616	0.00552	-0.01096	-0.00609	0.0083	-0.00428	-0.00367	0.00396		3.79456e-05	3.04704e-05	0.000120122	3.70881e-05	6.889e-05	1.83184e-05	1.34689e-05	1.56816e-05
38.8	0.04966	0.05182	0.02634	0.03246	0.03655	0.03627	0.02848	0.02376		0.0447	0.0506	0.0368	0.0331	0.0298	0.0375	0.0352	0.0202		0.00496	0.00122	-0.01046	-0.00064	0.00675	-0.00123	-0.00672	0.00356		2.46016e-05	1.4884e-06	0.000109412	4.096e-07	4.55625e-05	1.5129e-06	4.51584e-05	1.26736e-05
39	0.04826	0.05702	0.02679	0.02681	0.0349	0.03582	0.02863	0.02281		0.0445	0.0501	0.0366	0.0329	0.0297	0.0374	0.0349	0.0168		0.00376	0.00692	-0.00981	-0.00609	0.0052	-0.00158	-0.00627	0.00601		1.41376e-05	4.78864e-05	9.62361e-05	3.70881e-05	2.704e-05	2.4964e-06	3.93129e-05	3.61201e-05
39.2	0.05046	0.05842	0.02584	0.02666	0.03575	0.03737	0.03263	0.02151		0.0445	0.0497	0.0363	0.0328	0.0296	0.0374	0.0347	0.0179		0.00596	0.00872	-0.01046	-0.00614	0.00615	-3e-05	-0.00207	0.00361		3.55216e-05	7.60384e-05	0.000109412	3.76996e-05	3.78225e-05	9e-10	4.2849e-06	1.30321e-05
39.4	0.05321	0.05922	0.02664	0.02796	0.0401	0.03537	0.02783	0.02031		0.0441	0.0493	0.0359	0.0327	0.0295	0.0373	0.0347	0.0188		0.00911	0.00992	-0.00926	-0.00474	0.0106	-0.00193	-0.00687	0.00151		8.29921e-05	9.84064e-05	8.57476e-05	2.24676e-05	0.00011236	3.7249e-06	4.71969e-05	2.2801e-06
39.6	0.04871	0.06377	0.02514	0.02551	0.03565	0.03582	0.02938	0.02126		0.044	0.0489	0.0359	0.0327	0.0294	0.0371	0.0347	0.0198		0.00471	0.01487	-0.01076	-0.00719	0.00625	-0.00128	-0.00532	0.00146		2.21841e-05	0.000221117	0.000115778	5.16961e-05	3.90625e-05	1.6384e-06	2.83024e-05	2.1316e-06
39.8	0.04911	0.05957	0.02679	0.03236	0.037	0.03377	0.02788	0.02091		0.044	0.0486	0.0359	0.0325	0.0293	0.0368	0.0346	0.0183		0.00511	0.01097	-0.00911	-0.00014	0.0077	-0.00303	-0.00672	0.00261		2.61121e-05	0.000120341	8.29921e-05	1.96e-08	5.929e-05	9.1809e-06	4.51584e-05	6.8121e-06
40	0.05041	0.05472	0.02634	0.02646	0.0366	0.03282	0.02713	0.01926		0.0438	0.0486	0.0358	0.0324	0.0293	0.0365	0.0343	0.0149		0.00661	0.00612	-0.00946	-0.00594	0.0073	-0.00368	-0.00717	0.00436		4.36921e-05	3.74544e-05	8.94916e-05	3.52836e-05	5.329e-05	1.35424e-05	5.14089e-05	1.90096e-05
40.2	0.04881	0.05652	0.02629	0.02731	0.0347	0.04232	0.02643	0.02076		0.0436	0.0488	0.0357	0.0322	0.029	0.0363	0.034	0.0185		0.00521	0.00772	-0.00941	-0.00489	0.0057	0.00602	-0.00757	0.00226		2.71441e-05	5.95984e-05	8.85481e-05	2.39121e-05	3.249e-05	3.62404e-05	5.73049e-05	5.1076e-06
40.4	0.04841	0.05487	0.02774	0.02831	0.03295	0.03822	0.02903	0.02131		0.0435	0.0487	0.0355	0.0321	0.0289	0.0362	0.0339	0.0202		0.00491	0.00617	-0.00776	-0.00379	0.00405	0.00202	-0.00487	0.00111		2.41081e-05	3.80689e-05	6.02176e-05	1.43641e-05	1.64025e-05	4.0804e-06	2.37169e-05	1.2321e-06
40.6	0.04766	0.05667	0.02789	0.02756	0.0367	0.03607	0.02778	0.02241		0.0437	0.0484	0.0356	0.032	0.0289	0.0362	0.0339	0.0189		0.00396	0.00827	-0.00771	-0.00444	0.0078	-0.00013	-0.00612	0.00351		1.56816e-05	6.83929e-05	5.94441e-05	1.97136e-05	6.084e-05	1.69e-08	3.74544e-05	1.23201e-05
40.8	0.04721	0.06067	0.02794	0.03046	0.0309	0.03502	0.02973	0.02001		0.0437	0.0479	0.0356	0.032	0.0287	0.0362	0.0339	0.0153		0.00351	0.01277	-0.00766	-0.00154	0.0022	-0.00118	-0.00417	0.00471		1.23201e-05	0.000163073	5.86756e-05	2.3716e-06	4.84e-06	1.3924e-06	1.73889e-05	2.21841e-05
41	0.04751	0.05772	0.02654	0.02591	0.03615	0.03672	0.02633	0.02281		0.0433	0.0479	0.0354	0.032	0.0287	0.0361	0.0338	0.0171		0.00421	0.00982	-0.00886	-0.00609	0.00745	0.00062	-0.00747	0.00571		1.77241e-05	9.64324e-05	7.84996e-05	3.70881e-05	5.55025e-05	3.844e-07	5.58009e-05	3.26041e-05
41.2	0.04621	0.05632	0.02804	0.03086	0.0345	0.03347	0.02623	0.02276		0.043	0.0475	0.0353	0.032	0.0287	0.0361	0.0336	0.0181		0.00321	0.00882	-0.00726	-0.00114	0.0058	-0.00263	-0.00737	0.00466		1.03041e-05	7.77924e-05	5.27076e-05	1.2996e-06	3.364e-05	6.9169e-06	5.43169e-05	2.17156e-05
41.4	0.04901	0.05722	0.02584	0.02681	0.03525	0.03517	0.03278	0.02186		0.0426	0.0469	0.0352	0.0319	0.0287	0.0358	0.0335	0.0188		0.00641	0.01032	-0.00936	-0.00509	0.00655	-0.00063	-0.00072	0.00306		4.10881e-05	0.000106502	8.76096e-05	2.59081e-05	4.29025e-05	3.969e-07	5.184e-07	9.3636e-06
41.6	0.04616	0.05732	0.03019	0.02941	0.037	0.03737	0.02398	0.01911		0.0422	0.0464	0.0352	0.0317	0.0287	0.0357	0.0333	0.0209		0.00396	0.01092	-0.00501	-0.00229	0.0083	0.00167	-0.00932	-0.00179		1.56816e-05	0.000119246	2.51001e-05	5.2441e-06	6.889e-05	2.7889e-06	8.68624e-05	3.2041e-06
41.8	0.04751	0.05757	0.02759	0.02486	0.0409	0.03592	0.03008	0.02216		0.0417	0.046	0.0349	0.0315	0.0285	0.0355	0.0333	0.0208		0.00581	0.01157	-0.00731	-0.00664	0.0124	0.00042	-0.00322	0.00136		3.37561e-05	0.000133865	5.34361e-05	4.40896e-05	0.00015376	1.764e-07	1.03684e-05	1.8496e-06
42	0.04651	0.05722	0.02664	0.02466	0.0368	0.03602	0.02663	0.02251		0.0411	0.0457	0.0345	0.0314	0.0283	0.0353	0.0332	0.0175		0.00541	0.01152	-0.00786	-0.00674	0.0085	0.00072	-0.00657	0.00501		2.92681e-05	0.00013271	6.17796e-05	4.54276e-05	7.225e-05	5.184e-07	4.31649e-05	2.51001e-05
42.2	0.04701	0.05592	0.02599	0.02581	0.0363	0.03312	0.03088	0.02486		0.0408	0.0459	0.0341	0.0312	0.0282	0.0351	0.033	0.0165		0.00621	0.01002	-0.00811	-0.00539	0.0081	-0.00198	-0.00212	0.00836		3.85641e-05	0.0001004	6.57721e-05	2.90521e-05	6.561e-05	3.9204e-06	4.4944e-06	6.98896e-05
42.4	0.04481	0.05592	0.02489	0.02851	0.03995	0.03222	0.02598	0.02061		0.0406	0.046	0.0341	0.0309	0.028	0.0349	0.0328	0.0178		0.00421	0.00992	-0.00921	-0.00239	0.01195	-0.00268	-0.00682	0.00281		1.77241e-05	9.84064e-05	8.48241e-05	5.7121e-06	0.000142802	7.1824e-06	4.65124e-05	7.8961e-06
42.6	0.04421	0.05387	0.02749	0.02531	0.0327	0.03582	0.02778	0.02011		0.0408	0.0459	0.0342	0.0307	0.0278	0.0346	0.0326	0.0184		0.00341	0.00797	-0.00671	-0.00539	0.0049	0.00122	-0.00482	0.00171		1.16281e-05	6.35209e-05	4.50241e-05	2.90521e-05	2.401e-05	1.4884e-06	2.32324e-05	2.9241e-06
42.8	0.04621	0.05542	0.02629	0.02531	0.03665	0.03572	0.02648	0.01981		0.041	0.0457	0.0342	0.0306	0.0275	0.0345	0.0325	0.0181		0.00521	0.00972	-0.00791	-0.00529	0.00915	0.00122	-0.00602	0.00171		2.71441e-05	9.44784e-05	6.25681e-05	2.79841e-05	8.37225e-05	1.4884e-06	3.62404e-05	2.9241e-06
43	0.04456	0.05572	0.02804	0.02791	0.0339	0.03392	0.02718	0.01891		0.0408	0.0453	0.0339	0.0306	0.0273	0.0343	0.0323	0.0177		0.00376	0.01042	-0.00586	-0.00269	0.0066	-0.00038	-0.00512	0.00121		1.41376e-05	0.000108576	3.43396e-05	7.2361e-06	4.356e-05	1.444e-07	2.62144e-05	1.4641e-06
43.2	0.04536	0.05662	0.02909	0.02731	0.034	0.03707	0.02763	0.02031		0.0404	0.0448	0.0337	0.0306	0.0272	0.0343	0.0321	0.0156		0.00496	0.01182	-0.00461	-0.00329	0.0068	0.00277	-0.00447	0.00471		2.46016e-05	0.000139712	2.12521e-05	1.08241e-05	4.624e-05	7.6729e-06	1.99809e-05	2.21841e-05
43.4	0.04536	0.05717	0.02584	0.02271	0.03775	0.03212	0.02333	0.01926		0.0403	0.0443	0.0337	0.0305	0.0272	0.0343	0.0319	0.0165		0.00506	0.01287	-0.00786	-0.00779	0.01055	-0.00218	-0.00857	0.00276		2.56036e-05	0.000165637	6.17796e-05	6.06841e-05	0.000111303	4.7524e-06	7.34449e-05	7.6176e-06
43.6	0.04526	0.05107	0.02519	0.02486	0.03545	0.03772	0.02873	0.02021		0.0399	0.0435	0.0337	0.0302	0.0271	0.0342	0.0318	0.019		0.00536	0.00757	-0.00851	-0.00534	0.00835	0.00352	-0.00307	0.00121		2.87296e-05	5.73049e-05	7.24201e-05	2.85156e-05	6.97225e-05	1.23904e-05	9.4249e-06	1.4641e-06
43.8	0.04491	0.05017	0.02444	0.02501	0.03235	0.03412	0.02478	0.02171		0.0393	0.0427	0.0334	0.0302	0.027	0.0342	0.0318	0.02		0.00561	0.00747	-0.00896	-0.00519	0.00535	-8e-05	-0.00702	0.00171		3.14721e-05	5.58009e-05	8.02816e-05	2.69361e-05	2.86225e-05	6.4e-09	4.92804e-05	2.9241e-06
44	0.04366	0.05042	0.02784	0.02721	0.03295	0.03297	0.02868	0.02026		0.0384	0.0419	0.033	0.03	0.0269	0.034	0.0318	0.0197		0.00526	0.00852	-0.00516	-0.00279	0.00605	-0.00103	-0.00312	0.00056		2.76676e-05	7.25904e-05	2.66256e-05	7.7841e-06	3.66025e-05	1.0609e-06	9.7344e-06	3.136e-07
44.2	0.04346	0.05117	0.02584	0.02486	0.02755	0.03732	0.02468	0.01836		0.0379	0.0416	0.0327	0.0297	0.0268	0.0337	0.0317	0.0147		0.00556	0.00957	-0.00686	-0.00484	0.00075	0.00362	-0.00702	0.00366		3.09136e-05	9.15849e-05	4.70596e-05	2.34256e-05	5.625e-07	1.31044e-05	4.92804e-05	1.33956e-05
44.4	0.04191	0.04917	0.02734	0.02271	0.03405	0.03962	0.02978	0.02006		0.0374	0.0415	0.0325	0.0293	0.0266	0.0332	0.0315	0.0146		0.00451	0.00767	-0.00516	-0.00659	0.00745	0.00642	-0.00172	0.00546		2.03401e-05	5.88289e-05	2.66256e-05	4.34281e-05	5.55025e-05	4.12164e-05	2.9584e-06	2.98116e-05
44.6	0.04236	0.05162	0.02814	0.02316	0.0322	0.03412	0.02638	0.01831		0.0371	0.0415	0.0323	0.029	0.0264	0.0329	0.0312	0.0165		0.00526	0.01012	-0.00416	-0.00584	0.0058	0.00122	-0.00482	0.00181		2.76676e-05	0.000102414	1.73056e-05	3.41056e-05	3.364e-05	1.4884e-06	2.32324e-05	3.2761e-06
44.8	0.04181	0.05282	0.02499	0.02526	0.02795	0.03042	0.02383	0.02191		0.0374	0.0413	0.0322	0.0287	0.026	0.0326	0.0308	0.0176		0.00441	0.01152	-0.00721	-0.00344	0.00195	-0.00218	-0.00697	0.00431		1.94481e-05	0.00013271	5.19841e-05	1.18336e-05	3.8025e-06	4.7524e-06	4.85809e-05	1.85761e-05
45	0.04161	0.05257	0.02919	0.02811	0.02945	0.02867	0.02663	0.02076		0.0375	0.041	0.032	0.0287	0.0258	0.0324	0.0306	0.0166		0.00411	0.01157	-0.00281	-0.00059	0.00365	-0.00373	-0.00397	0.00416		1.68921e-05	0.000133865	7.8961e-06	3.481e-07	1.33225e-05	1.39129e-05	1.57609e-05	1.73056e-05
45.2	0.04136	0.05282	0.02564	0.02381	0.0282	0.03562	0.02343	0.01986		0.0373	0.0408	0.0319	0.0288	0.0255	0.0323	0.0303	0.0164		0.00406	0.01202	-0.00626	-0.00499	0.0027	0.00332	-0.00687	0.00346		1.64836e-05	0.00014448	3.91876e-05	2.49001e-05	7.29e-06	1.10224e-05	4.71969e-05	1.19716e-05
45.4	0.04201	0.04907	0.02679	0.02286	0.03055	0.04152	0.02708	0.01881		0.0372	0.0404	0.0318	0.0287	0.0253	0.0322	0.0301	0.0166		0.00481	0.00867	-0.00501	-0.00584	0.00525	0.00932	-0.00302	0.00221		2.31361e-05	7.51689e-05	2.51001e-05	3.41056e-05	2.75625e-05	8.68624e-05	9.1204e-06	4.8841e-06
45.6	0.04096	0.04657	0.02409	0.02346	0.0317	0.03157	0.02508	0.01861		0.037	0.0404	0.032	0.0285	0.0252	0.0321	0.0299	0.0171		0.00396	0.00617	-0.00791	-0.00504	0.0065	-0.00053	-0.00482	0.00151		1.56816e-05	3.80689e-05	6.25681e-05	2.54016e-05	4.225e-05	2.809e-07	2.32324e-05	2.2801e-06
45.8	0.04031	0.04622	0.02449	0.02336	0.0264	0.03337	0.02783	0.02041		0.0367	0.0405	0.0321	0.0283	0.0252	0.032	0.0298	0.017		0.00361	0.00572	-0.00761	-0.00494	0.0012	0.00137	-0.00197	0.00341		1.30321e-05	3.27184e-05	5.79121e-05	2.44036e-05	1.44e-06	1.8769e-06	3.8809e-06	1.16281e-05
46	0.04161	0.04652	0.02734	0.02401	0.0329	0.03302	0.02508	0.01961		0.0363	0.0403	0.0319	0.0281	0.0251	0.0319	0.0298	0.0146		0.00531	0.00622	-0.00456	-0.00409	0.0078	0.00112	-0.00472	0.00501		2.81961e-05	3.86884e-05	2.07936e-05	1.67281e-05	6.084e-05	1.2544e-06	2.22784e-05	2.51001e-05
46.2	0.03976	0.04447	0.02319	0.02661	0.02725	0.03247	0.02528	0.02046		0.0359	0.0402	0.0316	0.028	0.025	0.0319	0.0297	0.0162		0.00386	0.00427	-0.00841	-0.00139	0.00225	0.00057	-0.00442	0.00426		1.48996e-05	1.82329e-05	7.07281e-05	1.9321e-06	5.0625e-06	3.249e-07	1.95364e-05	1.81476e-05
46.4	0.04046	0.04407	0.02594	0.02486	0.02425	0.03172	0.02133	0.01751		0.0354	0.04	0.0312	0.0279	0.0248	0.0318	0.0296	0.0183		0.00506	0.00407	-0.00526	-0.00304	-0.00055	-8e-05	-0.00827	-0.00079		2.56036e-05	1.65649e-05	2.76676e-05	9.2416e-06	3.025e-07	6.4e-09	6.83929e-05	6.241e-07
46.6	0.04031	0.04572	0.02469	0.02251	0.02345	0.02942	0.02243	0.01851		0.0353	0.04	0.0311	0.0276	0.0247	0.0316	0.0294	0.0194		0.00501	0.00572	-0.00641	-0.00509	-0.00125	-0.00218	-0.00697	-0.00089		2.51001e-05	3.27184e-05	4.10881e-05	2.59081e-05	1.5625e-06	4.7524e-06	4.85809e-05	7.921e-07
46.8	0.03886	0.04892	0.02339	0.02041	0.02365	0.03222	0.02438	0.01886		0.0354	0.04	0.031	0.0274	0.0246	0.0313	0.0292	0.0189		0.00346	0.00892	-0.00761	-0.00699	-0.00095	0.00092	-0.00482	-4e-05		1.19716e-05	7.95664e-05	5.79121e-05	4.88601e-05	9.025e-07	8.464e-07	2.32324e-05	1.6e-09
47	0.04021	0.05087	0.02499	0.02331	0.02395	0.03592	0.02588	0.01876		0.0354	0.0398	0.031	0.0272	0.0244	0.0311	0.0289	0.0168		0.00481	0.01107	-0.00601	-0.00389	-0.00045	0.00482	-0.00302	0.00196		2.31361e-05	0.000122545	3.61201e-05	1.51321e-05	2.025e-07	2.32324e-05	9.1204e-06	3.8416e-06
47.2	0.03741	0.04967	0.02414	0.02286	0.0246	0.03402	0.02273	0.01721		0.0357	0.0395	0.0309	0.0271	0.0242	0.031	0.0287	0.0134		0.00171	0.01017	-0.00676	-0.00424	0.0004	0.00302	-0.00597	0.00381		2.9241e-06	0.000103429	4.56976e-05	1.79776e-05	1.6e-07	9.1204e-06	3.56409e-05	1.45161e-05
47.4	0.03836	0.05062	0.02554	0.02086	0.0278	0.03767	0.02628	0.01881		0.0357	0.0391	0.0307	0.0272	0.024	0.0309	0.0287	0.0137		0.00266	0.01152	-0.00516	-0.00634	0.0038	0.00677	-0.00242	0.00511		7.0756e-06	0.00013271	2.66256e-05	4.01956e-05	1.444e-05	4.58329e-05	5.8564e-06	2.61121e-05
47.6	0.03766	0.04887	0.02409	0.02411	0.02765	0.03007	0.02233	0.02046		0.0356	0.0387	0.0304	0.0272	0.0239	0.0308	0.0288	0.0141		0.00206	0.01017	-0.00631	-0.00309	0.00375	-0.00073	-0.00647	0.00636		4.2436e-06	0.000103429	3.98161e-05	9.5481e-06	1.40625e-05	5.329e-07	4.18609e-05	4.04496e-05
47.8	0.03826	0.04922	0.02369	0.02421	0.0294	0.02872	0.02458	0.01966		0.0355	0.0383	0.0303	0.0271	0.0238	0.0307	0.0287	0.0146		0.00276	0.01092	-0.00661	-0.00289	0.0056	-0.00198	-0.00412	0.00506		7.6176e-06	0.000119246	4.36921e-05	8.3521e-06	3.136e-05	3.9204e-06	1.69744e-05	2.56036e-05
48	0.03711	0.04702	0.02474	0.02286	0.02785	0.02937	0.02208	0.02026		0.0354	0.0384	0.0301	0.027	0.0238	0.0306	0.0285	0.0157		0.00171	0.00862	-0.00536	-0.00414	0.00405	-0.00123	-0.00642	0.00456		2.9241e-06	7.43044e-05	2.87296e-05	1.71396e-05	1.64025e-05	1.5129e-06	4.12164e-05	2.07936e-05
48.2	0.03721	0.04657	0.02329	0.02546	0.027	0.03257	0.02243	0.01916		0.0351	0.0384	0.0301	0.0268	0.0238	0.0305	0.0283	0.0176		0.00211	0.00817	-0.00681	-0.00134	0.0032	0.00207	-0.00587	0.00156		4.4521e-06	6.67489e-05	4.63761e-05	1.7956e-06	1.024e-05	4.2849e-06	3.44569e-05	2.4336e-06
48.4	0.03751	0.04737	0.02439	0.02136	0.02365	0.03802	0.02418	0.01816		0.035	0.0383	0.0301	0.0267	0.0238	0.0304	0.0282	0.0174		0.00251	0.00907	-0.00571	-0.00534	-0.00015	0.00762	-0.00402	0.00076		6.3001e-06	8.22649e-05	3.26041e-05	2.85156e-05	2.25e-08	5.80644e-05	1.61604e-05	5.776e-07
48.6	0.03706	0.04752	0.02354	0.02216	0.02495	0.03542	0.02368	0.01846		0.0347	0.0382	0.03	0.0266	0.0237	0.0303	0.0282	0.0154		0.00236	0.00932	-0.00646	-0.00444	0.00125	0.00512	-0.00452	0.00306		5.5696e-06	8.68624e-05	4.17316e-05	1.97136e-05	1.5625e-06	2.62144e-05	2.04304e-05	9.3636e-06
48.8	0.03841	0.04902	0.02329	0.02116	0.02645	0.03912	0.02313	0.01886		0.0346	0.038	0.0299	0.0265	0.0236	0.03	0.0281	0.0132		0.00381	0.01102	-0.00661	-0.00534	0.00285	0.00912	-0.00497	0.00566		1.45161e-05	0.00012144	4.36921e-05	2.85156e-05	8.1225e-06	8.31744e-05	2.47009e-05	3.20356e-05
49	0.03731	0.04612	0.02369	0.02061	0.02715	0.03087	0.02403	0.01941		0.0347	0.0379	0.0298	0.0264	0.0236	0.0299	0.0279	0.015		0.00261	0.00822	-0.00611	-0.00579	0.00355	0.00097	-0.00387	0.00441		6.8121e-06	6.75684e-05	3.73321e-05	3.35241e-05	1.26025e-05	9.409e-07	1.49769e-05	1.94481e-05
49.2	0.03846	0.04617	0.02259	0.02056	0.0237	0.02712	0.02313	0.01986		0.0347	0.0377	0.0297	0.0263	0.0235	0.0298	0.0277	0.0179		0.00376	0.00847	-0.00711	-0.00574	0.0002	-0.00268	-0.00457	0.00196		1.41376e-05	7.17409e-05	5.05521e-05	3.29476e-05	4e-08	7.1824e-06	2.08849e-05	3.8416e-06
49.4	0.03706	0.04487	0.02399	0.02216	0.02135	0.02922	0.02418	0.01976		0.0346	0.0375	0.0297	0.0262	0.0234	0.0297	0.0276	0.0183		0.00246	0.00737	-0.00571	-0.00404	-0.00205	-0.00048	-0.00342	0.00146		6.0516e-06	5.43169e-05	3.26041e-05	1.63216e-05	4.2025e-06	2.304e-07	1.16964e-05	2.1316e-06
49.6	0.03711	0.04442	0.02314	0.02036	0.0226	0.02827	0.02128	0.01631		0.0345	0.0374	0.0297	0.0262	0.0233	0.0297	0.0276	0.0179		0.00261	0.00702	-0.00656	-0.00584	-0.0007	-0.00143	-0.00632	-0.00159		6.8121e-06	4.92804e-05	4.30336e-05	3.41056e-05	4.9e-07	2.0449e-06	3.99424e-05	2.5281e-06
49.8	0.03671	0.04532	0.02229	0.02226	0.02245	0.03147	0.02123	0.01711		0.0343	0.0372	0.0297	0.0262	0.0232	0.0297	0.0276	0.0164		0.00241	0.00812	-0.00741	-0.00394	-0.00075	0.00177	-0.00637	0.00071		5.8081e-06	6.59344e-05	5.49081e-05	1.55236e-05	5.625e-07	3.1329e-06	4.05769e-05	5.041e-07
50	0.03686	0.04547	0.02319	0.02141	0.02015	0.02962	0.02373	0.01796		0.034	0.0372	0.0296	0.0262	0.0231	0.0296	0.0276	0.0161		0.00286	0.00827	-0.00641	-0.00479	-0.00295	2e-05	-0.00387	0.00186		8.1796e-06	6.83929e-05	4.10881e-05	2.29441e-05	8.7025e-06	4e-10	1.49769e-05	3.4596e-06
50.2	0.03636	0.04502	0.02194	0.02051	0.0208	0.03052	0.02278	0.01791		0.0338	0.0373	0.0294	0.026	0.0231	0.0294	0.0274	0.0162		0.00256	0.00772	-0.00746	-0.00549	-0.0023	0.00112	-0.00462	0.00171		6.5536e-06	5.95984e-05	5.56516e-05	3.01401e-05	5.29e-06	1.2544e-06	2.13444e-05	2.9241e-06
50.4	0.03666	0.04512	0.02359	0.02121	0.02165	0.03057	0.02173	0.01796		0.0337	0.0374	0.0293	0.0258	0.023	0.0292	0.0272	0.0162		0.00296	0.00772	-0.00571	-0.00459	-0.00135	0.00137	-0.00547	0.00176		8.7616e-06	5.95984e-05	3.26041e-05	2.10681e-05	1.8225e-06	1.8769e-06	2.99209e-05	3.0976e-06
50.6	0.03656	0.04597	0.02259	0.02006	0.021	0.02977	0.02353	0.01736		0.0336	0.0377	0.0292	0.0256	0.0229	0.0291	0.027	0.0157		0.00296	0.00827	-0.00661	-0.00554	-0.0019	0.00067	-0.00347	0.00166		8.7616e-06	6.83929e-05	4.36921e-05	3.06916e-05	3.61e-06	4.489e-07	1.20409e-05	2.7556e-06
50.8	0.03591	0.04742	0.02209	0.02186	0.0216	0.03182	0.02178	0.01991		0.0335	0.0381	0.0291	0.0255	0.0228	0.0291	0.0269	0.0157		0.00241	0.00932	-0.00701	-0.00364	-0.0012	0.00272	-0.00512	0.00421		5.8081e-06	8.68624e-05	4.91401e-05	1.32496e-05	1.44e-06	7.3984e-06	2.62144e-05	1.77241e-05
51	0.03661	0.04502	0.02324	0.02086	0.02245	0.03152	0.01913	0.01971		0.0336	0.0381	0.0291	0.0255	0.0227	0.029	0.0269	0.0157		0.00301	0.00692	-0.00586	-0.00464	-0.00025	0.00252	-0.00777	0.00401		9.0601e-06	4.78864e-05	3.43396e-05	2.15296e-05	6.25e-08	6.3504e-06	6.03729e-05	1.60801e-05
51.2	0.03691	0.04547	0.02159	0.01971	0.02135	0.02647	0.02303	0.02031		0.0339	0.038	0.0291	0.0255	0.0226	0.029	0.0269	0.0157		0.00301	0.00747	-0.00751	-0.00579	-0.00125	-0.00253	-0.00387	0.00461		9.0601e-06	5.58009e-05	5.64001e-05	3.35241e-05	1.5625e-06	6.4009e-06	1.49769e-05	2.12521e-05
51.4	0.03546	0.04557	0.02244	0.02181	0.02205	0.02972	0.02193	0.02046		0.0341	0.0379	0.0292	0.0255	0.0225	0.0289	0.0268	0.0157		0.00136	0.00767	-0.00676	-0.00369	-0.00045	0.00082	-0.00487	0.00476		1.8496e-06	5.88289e-05	4.56976e-05	1.36161e-05	2.025e-07	6.724e-07	2.37169e-05	2.26576e-05
51.6	0.03576	0.04642	0.02404	0.02146	0.02235	0.02922	0.02388	0.01896		0.0341	0.0379	0.0291	0.0254	0.0224	0.0289	0.0267	0.0157		0.00166	0.00852	-0.00506	-0.00394	-5e-05	0.00032	-0.00282	0.00326		2.7556e-06	7.25904e-05	2.56036e-05	1.55236e-05	2.5e-09	1.024e-07	7.9524e-06	1.06276e-05
51.8	0.03586	0.04797	0.02289	0.02006	0.02185	0.02937	0.02093	0.01836		0.0341	0.0377	0.0291	0.0254	0.0224	0.029	0.0266	0.0158		0.00176	0.01027	-0.00621	-0.00534	-0.00055	0.00037	-0.00567	0.00256		3.0976e-06	0.000105473	3.85641e-05	2.85156e-05	3.025e-07	1.369e-07	3.21489e-05	6.5536e-06
52	0.03501	0.04752	0.02319	0.02046	0.0208	0.02997	0.02158	0.01981		0.0341	0.0376	0.029	0.0254	0.0224	0.0291	0.0266	0.0159		0.00091	0.00992	-0.00581	-0.00494	-0.0016	0.00087	-0.00502	0.00391		8.281e-07	9.84064e-05	3.37561e-05	2.44036e-05	2.56e-06	7.569e-07	2.52004e-05	1.52881e-05
52.2	0.03546	0.04912	0.02194	0.02091	0.02045	0.03017	0.02178	0.01926		0.034	0.0377	0.029	0.0255	0.0225	0.029	0.0268	0.0159		0.00146	0.01142	-0.00706	-0.00459	-0.00205	0.00117	-0.00502	0.00336		2.1316e-06	0.000130416	4.98436e-05	2.10681e-05	4.2025e-06	1.3689e-06	2.52004e-05	1.12896e-05
52.4	0.03521	0.04737	0.02169	0.01841	0.0239	0.02692	0.02103	0.01861		0.0339	0.0378	0.0289	0.0255	0.0225	0.0289	0.0268	0.0159		0.00131	0.00957	-0.00721	-0.00709	0.0014	-0.00198	-0.00577	0.00271		1.7161e-06	9.15849e-05	5.19841e-05	5.02681e-05	1.96e-06	3.9204e-06	3.32929e-05	7.3441e-06
52.6	0.03626	0.04582	0.02124	0.02091	0.02195	0.02807	0.02208	0.01851		0.034	0.0383	0.0288	0.0254	0.0225	0.0289	0.0267	0.0159		0.00226	0.00752	-0.00756	-0.00449	-0.00055	-0.00083	-0.00462	0.00261		5.1076e-06	5.65504e-05	5.71536e-05	2.01601e-05	3.025e-07	6.889e-07	2.13444e-05	6.8121e-06
52.8	0.03581	0.04652	0.02089	0.01956	0.0249	0.02677	0.01973	0.01776		0.034	0.0386	0.0287	0.0253	0.0225	0.0287	0.0266	0.016		0.00181	0.00792	-0.00781	-0.00574	0.0024	-0.00193	-0.00687	0.00176		3.2761e-06	6.27264e-05	6.09961e-05	3.29476e-05	5.76e-06	3.7249e-06	4.71969e-05	3.0976e-06
53	0.03491	0.04637	0.02209	0.02011	0.02285	0.02792	0.02118	0.01771		0.0342	0.0387	0.0288	0.0253	0.0224	0.0287	0.0265	0.0161		0.00071	0.00767	-0.00671	-0.00519	0.00045	-0.00078	-0.00532	0.00161		5.041e-07	5.88289e-05	4.50241e-05	2.69361e-05	2.025e-07	6.084e-07	2.83024e-05	2.5921e-06
53.2	0.03616	0.04622	0.02224	0.02271	0.02095	0.02667	0.02258	0.01946		0.0344	0.039	0.0289	0.0253	0.0224	0.0288	0.0264	0.0162		0.00176	0.00722	-0.00666	-0.00259	-0.00145	-0.00213	-0.00382	0.00326		3.0976e-06	5.21284e-05	4.43556e-05	6.7081e-06	2.1025e-06	4.5369e-06	1.45924e-05	1.06276e-05
53.4	0.03596	0.04532	0.02189	0.01976	0.0215	0.03032	0.02058	0.01801		0.0347	0.0392	0.0289	0.0253	0.0225	0.0288	0.0265	0.0163		0.00126	0.00612	-0.00701	-0.00554	-0.001	0.00152	-0.00592	0.00171		1.5876e-06	3.74544e-05	4.91401e-05	3.06916e-05	1e-06	2.3104e-06	3.50464e-05	2.9241e-06
53.6	0.03526	0.04432	0.02264	0.02166	0.0201	0.02722	0.02048	0.01836		0.035	0.0396	0.029	0.0254	0.0225	0.0289	0.0265	0.0164		0.00026	0.00472	-0.00636	-0.00374	-0.0024	-0.00168	-0.00602	0.00196		6.76e-08	2.22784e-05	4.04496e-05	1.39876e-05	5.76e-06	2.8224e-06	3.62404e-05	3.8416e-06
53.8	0.03596	0.04552	0.02119	0.01961	0.02185	0.02632	0.01963	0.01791		0.0352	0.0398	0.0291	0.0255	0.0225	0.029	0.0266	0.0166		0.00076	0.00572	-0.00791	-0.00589	-0.00065	-0.00268	-0.00697	0.00131		5.776e-07	3.27184e-05	6.25681e-05	3.46921e-05	4.225e-07	7.1824e-06	4.85809e-05	1.7161e-06
54	0.03601	0.05037	0.02269	0.02031	0.02175	0.03027	0.02013	0.01831		0.0354	0.0397	0.0291	0.0256	0.0226	0.029	0.0266	0.0168		0.00061	0.01067	-0.00641	-0.00529	-0.00085	0.00127	-0.00647	0.00151		3.721e-07	0.000113849	4.10881e-05	2.79841e-05	7.225e-07	1.6129e-06	4.18609e-05	2.2801e-06
54.2	0.03571	0.05132	0.02109	0.01976	0.02105	0.02817	0.02393	0.01761		0.0356	0.0398	0.0292	0.0257	0.0226	0.0292	0.0266	0.0169		0.00011	0.01152	-0.00811	-0.00594	-0.00155	-0.00103	-0.00267	0.00071		1.21e-08	0.00013271	6.57721e-05	3.52836e-05	2.4025e-06	1.0609e-06	7.1289e-06	5.041e-07
54.4	0.03571	0.04842	0.02294	0.01841	0.02065	0.02882	0.02193	0.01706		0.0354	0.0394	0.0291	0.0258	0.0226	0.0293	0.0267	0.0169		0.00031	0.00902	-0.00616	-0.00739	-0.00195	-0.00048	-0.00477	0.00016		9.61e-08	8.13604e-05	3.79456e-05	5.46121e-05	3.8025e-06	2.304e-07	2.27529e-05	2.56e-08
54.6	0.03586	0.04687	0.02224	0.02096	0.02415	0.02652	0.02043	0.01916		0.0353	0.0393	0.0291	0.0258	0.0228	0.0294	0.0267	0.0168		0.00056	0.00757	-0.00686	-0.00484	0.00135	-0.00288	-0.00627	0.00236		3.136e-07	5.73049e-05	4.70596e-05	2.34256e-05	1.8225e-06	8.2944e-06	3.93129e-05	5.5696e-06
54.8	0.03601	0.04767	0.02249	0.01971	0.02225	0.02717	0.01953	0.01826		0.0351	0.0392	0.0289	0.0258	0.0229	0.0295	0.0268	0.0166		0.00091	0.00847	-0.00641	-0.00609	-0.00065	-0.00233	-0.00727	0.00166		8.281e-07	7.17409e-05	4.10881e-05	3.70881e-05	4.225e-07	5.4289e-06	5.28529e-05	2.7556e-06
55	0.03636	0.04847	0.02299	0.02111	0.02325	0.02857	0.02188	0.01886		0.0348	0.0392	0.0289	0.0258	0.0229	0.0294	0.0268	0.0164		0.00156	0.00927	-0.00591	-0.00469	0.00035	-0.00083	-0.00492	0.00246		2.4336e-06	8.59329e-05	3.49281e-05	2.19961e-05	1.225e-07	6.889e-07	2.42064e-05	6.0516e-06
55.2	0.03616	0.04622	0.02219	0.01991	0.02325	0.02592	0.02133	0.01796		0.0349	0.0393	0.0288	0.0257	0.023	0.0293	0.0269	0.0165		0.00126	0.00692	-0.00661	-0.00579	0.00025	-0.00338	-0.00557	0.00146		1.5876e-06	4.78864e-05	4.36921e-05	3.35241e-05	6.25e-08	1.14244e-05	3.10249e-05	2.1316e-06
55.4	0.03626	0.04712	0.02194	0.01901	0.0199	0.02647	0.02123	0.01846		0.035	0.0398	0.0289	0.0257	0.023	0.0293	0.0269	0.0153		0.00126	0.00732	-0.00696	-0.00669	-0.0031	-0.00283	-0.00567	0.00316		1.5876e-06	5.35824e-05	4.84416e-05	4.47561e-05	9.61e-06	8.0089e-06	3.21489e-05	9.9856e-06
55.6	0.03731	0.04512	0.02279	0.02096	0.0204	0.02722	0.02013	0.01846		0.0351	0.0405	0.0289	0.0257	0.0229	0.0292	0.0269	0.0151		0.00221	0.00462	-0.00611	-0.00474	-0.0025	-0.00198	-0.00677	0.00336		4.8841e-06	2.13444e-05	3.73321e-05	2.24676e-05	6.25e-06	3.9204e-06	4.58329e-05	1.12896e-05
55.8	0.03621	0.04492	0.02229	0.01806	0.02325	0.02602	0.02173	0.01631		0.0355	0.0415	0.0291	0.0256	0.0229	0.0291	0.0269	0.0154		0.00071	0.00342	-0.00681	-0.00754	0.00035	-0.00308	-0.00517	0.00091		5.041e-07	1.16964e-05	4.63761e-05	5.68516e-05	1.225e-07	9.4864e-06	2.67289e-05	8.281e-07
56	0.03706	0.04412	0.02384	0.02036	0.0261	0.02717	0.02098	0.01781		0.0361	0.042	0.0293	0.0256	0.0228	0.0291	0.0268	0.0158		0.00096	0.00212	-0.00546	-0.00524	0.0033	-0.00193	-0.00582	0.00201		9.216e-07	4.4944e-06	2.98116e-05	2.74576e-05	1.089e-05	3.7249e-06	3.38724e-05	4.0401e-06
56.2	0.03696	0.04302	0.02194	0.01836	0.02205	0.02522	0.02338	0.01986		0.0368	0.0421	0.0297	0.0258	0.0228	0.0293	0.0267	0.0159		0.00016	0.00092	-0.00776	-0.00744	-0.00075	-0.00408	-0.00332	0.00396		2.56e-08	8.464e-07	6.02176e-05	5.53536e-05	5.625e-07	1.66464e-05	1.10224e-05	1.56816e-05
56.4	0.03666	0.04482	0.02439	0.02156	0.02175	0.02527	0.01988	0.01786		0.0372	0.0421	0.0297	0.026	0.0228	0.0296	0.0267	0.0157		-0.00054	0.00272	-0.00531	-0.00444	-0.00105	-0.00433	-0.00682	0.00216		2.916e-07	7.3984e-06	2.81961e-05	1.97136e-05	1.1025e-06	1.87489e-05	4.65124e-05	4.6656e-06
56.6	0.03706	0.04662	0.02424	0.01991	0.0202	0.02722	0.02188	0.01861		0.0371	0.0418	0.0295	0.0264	0.023	0.0299	0.0269	0.0156		-4e-05	0.00482	-0.00526	-0.00649	-0.0028	-0.00268	-0.00502	0.00301		1.6e-09	2.32324e-05	2.76676e-05	4.21201e-05	7.84e-06	7.1824e-06	2.52004e-05	9.0601e-06
56.8	0.03696	0.04597	0.02264	0.02111	0.0217	0.03132	0.01753	0.01761		0.037	0.0416	0.0297	0.0266	0.0232	0.0303	0.0271	0.0155		-4e-05	0.00437	-0.00706	-0.00549	-0.0015	0.00102	-0.00957	0.00211		1.6e-09	1.90969e-05	4.98436e-05	3.01401e-05	2.25e-06	1.0404e-06	9.15849e-05	4.4521e-06
57	0.03736	0.04332	0.02399	0.02026	0.0211	0.02837	0.02188	0.01806		0.0367	0.0414	0.0297	0.0267	0.0235	0.0304	0.0274	0.0158		0.00066	0.00192	-0.00571	-0.00644	-0.0024	-0.00203	-0.00552	0.00226		4.356e-07	3.6864e-06	3.26041e-05	4.14736e-05	5.76e-06	4.1209e-06	3.04704e-05	5.1076e-06
57.2	0.03741	0.04482	0.02244	0.02196	0.0223	0.02582	0.02248	0.01636		0.0365	0.0413	0.0298	0.0266	0.0237	0.0304	0.0275	0.0168		0.00091	0.00352	-0.00736	-0.00464	-0.0014	-0.00458	-0.00502	-0.00044		8.281e-07	1.23904e-05	5.41696e-05	2.15296e-05	1.96e-06	2.09764e-05	2.52004e-05	1.936e-07
57.4	0.03681	0.04497	0.02499	0.01996	0.0249	0.02677	0.02093	0.01976		0.0364	0.041	0.0298	0.0264	0.0237	0.0303	0.0275	0.017		0.00041	0.00397	-0.00481	-0.00644	0.0012	-0.00353	-0.00657	0.00276		1.681e-07	1.57609e-05	2.31361e-05	4.14736e-05	1.44e-06	1.24609e-05	4.31649e-05	7.6176e-06
57.6	0.03711	0.04552	0.02289	0.02396	0.02585	0.02747	0.02413	0.01816		0.0361	0.041	0.0295	0.0262	0.0237	0.0302	0.0274	0.0163		0.00101	0.00452	-0.00661	-0.00224	0.00215	-0.00273	-0.00327	0.00186		1.0201e-06	2.04304e-05	4.36921e-05	5.0176e-06	4.6225e-06	7.4529e-06	1.06929e-05	3.4596e-06
57.8	0.03781	0.04447	0.02209	0.02011	0.0266	0.02692	0.02208	0.01896		0.0357	0.0409	0.0292	0.0262	0.0237	0.0302	0.0274	0.0132		0.00211	0.00357	-0.00711	-0.00609	0.0029	-0.00328	-0.00532	0.00576		4.4521e-06	1.27449e-05	5.05521e-05	3.70881e-05	8.41e-06	1.07584e-05	2.83024e-05	3.31776e-05
58	0.03711	0.04682	0.02254	0.02051	0.0288	0.02742	0.02073	0.01806		0.0359	0.0407	0.0293	0.0263	0.0237	0.03	0.0275	0.0132		0.00121	0.00612	-0.00676	-0.00579	0.0051	-0.00258	-0.00677	0.00486		1.4641e-06	3.74544e-05	4.56976e-05	3.35241e-05	2.601e-05	6.6564e-06	4.58329e-05	2.36196e-05
58.2	0.03761	0.04937	0.02154	0.02006	0.02295	0.02647	0.02248	0.01916		0.0363	0.0406	0.0293	0.0263	0.0237	0.0299	0.0276	0.0144		0.00131	0.00877	-0.00776	-0.00624	-0.00075	-0.00343	-0.00512	0.00476		1.7161e-06	7.69129e-05	6.02176e-05	3.89376e-05	5.625e-07	1.17649e-05	2.62144e-05	2.26576e-05
58.4	0.03686	0.05132	0.02349	0.02336	0.02485	0.02642	0.02178	0.01986		0.0365	0.0407	0.0295	0.0264	0.0236	0.0298	0.0276	0.0162		0.00036	0.01062	-0.00601	-0.00304	0.00125	-0.00338	-0.00582	0.00366		1.296e-07	0.000112784	3.61201e-05	9.2416e-06	1.5625e-06	1.14244e-05	3.38724e-05	1.33956e-05
58.6	0.03676	0.04957	0.02349	0.02086	0.02355	0.02702	0.02353	0.01876		0.0364	0.0404	0.0294	0.0265	0.0233	0.0299	0.0275	0.0178		0.00036	0.00917	-0.00591	-0.00564	0.00025	-0.00288	-0.00397	0.00096		1.296e-07	8.40889e-05	3.49281e-05	3.18096e-05	6.25e-08	8.2944e-06	1.57609e-05	9.216e-07
58.8	0.03721	0.04937	0.02144	0.02091	0.02495	0.02792	0.02153	0.01666		0.0363	0.0408	0.0295	0.0266	0.0233	0.0299	0.0275	0.0189		0.00091	0.00857	-0.00806	-0.00569	0.00165	-0.00198	-0.00597	-0.00224		8.281e-07	7.34449e-05	6.49636e-05	3.23761e-05	2.7225e-06	3.9204e-06	3.56409e-05	5.0176e-06
59	0.03686	0.04882	0.02369	0.02296	0.0258	0.03112	0.02198	0.01726		0.0362	0.041	0.0294	0.0264	0.0233	0.0299	0.0274	0.0184		0.00066	0.00782	-0.00571	-0.00344	0.0025	0.00122	-0.00542	-0.00114		4.356e-07	6.11524e-05	3.26041e-05	1.18336e-05	6.25e-06	1.4884e-06	2.93764e-05	1.2996e-06
59.2	0.03836	0.04712	0.02344	0.02206	0.0274	0.02967	0.02228	0.01661		0.0361	0.0416	0.0299	0.0265	0.0234	0.0299	0.0274	0.0168		0.00226	0.00552	-0.00646	-0.00444	0.004	-0.00023	-0.00512	-0.00019		5.1076e-06	3.04704e-05	4.17316e-05	1.97136e-05	1.6e-05	5.29e-08	2.62144e-05	3.61e-08
59.4	0.03736	0.04587	0.02459	0.01946	0.02775	0.02847	0.02173	0.01706		0.0361	0.0423	0.0299	0.0263	0.0235	0.03	0.0273	0.016		0.00126	0.00357	-0.00531	-0.00684	0.00425	-0.00153	-0.00557	0.00106		1.5876e-06	1.27449e-05	2.81961e-05	4.67856e-05	1.80625e-05	2.3409e-06	3.10249e-05	1.1236e-06
59.6	0.03796	0.04642	0.02274	0.02311	0.02575	0.02852	0.02268	0.02011		0.0362	0.0428	0.0298	0.0263	0.0236	0.0301	0.0273	0.0146		0.00176	0.00362	-0.00706	-0.00319	0.00215	-0.00158	-0.00462	0.00551		3.0976e-06	1.31044e-05	4.98436e-05	1.01761e-05	4.6225e-06	2.4964e-06	2.13444e-05	3.03601e-05
59.8	0.03706	0.04827	0.02204	0.02016	0.03275	0.02817	0.02248	0.01871		0.0365	0.0426	0.0298	0.0264	0.0235	0.0303	0.0274	0.0143		0.00056	0.00567	-0.00776	-0.00624	0.00925	-0.00213	-0.00492	0.00441		3.136e-07	3.21489e-05	6.02176e-05	3.89376e-05	8.55625e-05	4.5369e-06	2.42064e-05	1.94481e-05
60	0.0541905	0.0650706	0.0317176	0.031793	0.0373012	0.042152	0.0331294	0.0258625		0.0488023	0.053931	0.0411879	0.0373307	0.0334165	0.0419019	0.0396919	0.0221959		0.00538829	0.0111396	-0.00947034	-0.0055377	0.00388472	0.000250103	-0.00656249	0.00366657		2.90336e-05	0.000124092	8.96873e-05	3.06661e-05	1.5091e-05	6.25513e-08	4.30663e-05	1.34437e-05

## Sheet: PPMCC
t	S3	S4	S5	S6	S7	S8	S9	S10		t	HEC_M10_P3	HEC_M10_P4	HEC_M10_P5	HEC_M10_P6	HEC_M10_P7	HEC_M10_P8	HEC_M10_P9	HEC_M10_P10		HEC_M0.1_P3	HEC_M0.1_P4	HEC_M0.1_P5	HEC_M0.1_P6	HEC_M0.1_P7	HEC_M0.1_P8	HEC_M0.1_P9	HEC_M0.1_P10		HEC_M1_P3	HEC_M1_P4	HEC_M1_P5	HEC_M1_P6	HEC_M1_P7	HEC_M1_P8	HEC_M1_P9	HEC_M1_P10		t	HEC_P3	HEC_P4	HEC_P5	HEC_P6	HEC_P7	HEC_P8	HEC_P9	HEC_P10
0	0.00011	-8e-05	0.00039	6e-05	0	-3e-05	-7e-05	-4e-05		0	0	0	0	0	0	0	0	0		0	0	0	0	0	0	0	0		0	0	0	0	0	0	0	0		0	0	0	0	0	0	0	0	0
0.2	-0.00014	7e-05	-6e-05	0.00011	0	-3e-05	-7e-05	-9e-05		0.2	0	0	0	0	0	0	0	0		0	0	0	0	0	0	0	0		0	0	0	0	0	0	0	0		0.2	0	0	0	0	0	0	0	0
0.4	-0.00014	-3e-05	-6e-05	6e-05	-0.00015	0.00012	-2e-05	-9e-05		0.4	0	0	0	0	0	0	0	0		0	0	0	0	0	0	0	0		0	0	0	0	0	0	0	0		0.4	0	0	0	0	0	0	0	0
0.6	6e-05	2e-05	-6e-05	6e-05	5e-05	-8e-05	3e-05	-9e-05		0.6	0	0	0	0	0	0	0	0		0	0	0	0	0	0	0	0		0	0	0	0	0	0	0	0		0.6	0	0	0	0	0	0	0	0
0.8	1e-05	-0.00013	4e-05	6e-05	-5e-05	-3e-05	3e-05	-9e-05		0.8	0	0	0	0	0	0	0	0		0	0	0	0	0	0	0	0		0	0	0	0	0	0	0	0		0.8	0	0	0	0	0	0	0	0
1	-0.00014	0.00017	-6e-05	6e-05	-0.00015	0.00012	3e-05	-0.00014		1	0	0	0	0	0	0	0	0		0	0	0	0	0	0	0	0		0	0	0	0	0	0	0	0		1	0	0	0	0	0	0	0	0
1.2	1e-05	-3e-05	-0.00021	1e-05	0.0001	-3e-05	-2e-05	-0.00014		1.2	0	0	0	0	0	0	0	0		0	0	0	0	0	0	0	0		0	0	0	0	0	0	0	0		1.2	0	0	0	0	0	0	0	0
1.4	1e-05	-3e-05	9e-05	6e-05	0	-3e-05	-2e-05	-0.00014		1.4	0	0	0	0	0	0	0	0		0	0	0	0	0	0	0	0		0	0	0	0	0	0	0	0		1.4	0	0	0	0	0	0	0	0
1.6	0.00026	-0.00013	4e-05	-4e-05	-5e-05	0.00012	-2e-05	-0.00014		1.6	0	0	0	0	0	0	0	0		0	0	0	0	0	0	0	0		0	0	0	0	0	0	0	0		1.6	0	0	0	0	0	0	0	0
1.8	1e-05	0.00027	-1e-05	-4e-05	0.0002	-0.00013	3e-05	-0.00014		1.8	0	0	0	0	0	0	0	0		0	0	0	0	0	0	0	0		0	0	0	0	0	0	0	0		1.8	0	0	0	0	0	0	0	0
2	-9e-05	2e-05	-1e-05	1e-05	0	-3e-05	0.00013	-9e-05		2	0	0	0	0	0	0	0	0		0	0	0	0	0	0	0	0		0	0	0	0	0	0	0	0		2	0	0	0	0	0	0	0	0
2.2	0.00011	-0.00018	-1e-05	-4e-05	0	0.00012	0.00013	-9e-05		2.2	0	0	0	0	0	0	0	0		0	0	0	0	0	0	0	0		0	0	0	0	0	0	0	0		2.2	0	0	0	0	0	0	0	0
2.4	1e-05	-0.00013	-1e-05	1e-05	-0.00015	-0.00013	0.00013	1e-05		2.4	0	0	0	0	0	0	0	0		0	0	0	0	0	0	0	0		0	0	0	0	0	0	0	0		2.4	0	0	0	0	0	0	0	0
2.6	-9e-05	0.00032	-0.00016	-4e-05	5e-05	7e-05	0.00023	0.00011		2.6	0	0	0	0	0	0	0	0		0	0	0	0	0	0	0	0		0	0	0	0	0	0	0	0		2.6	0	0	0	0	0	0	0	0
2.8	0.00011	7e-05	4e-05	-4e-05	0	0.00012	-7e-05	0.00031		2.8	0	0	0	0	0	0	0	0		0	0	0	0	0	0	0	0		0	0	0	0	0	0	0	0		2.8	0	0	0	0	0	0	0	0
3	1e-05	-8e-05	4e-05	-4e-05	-0.00015	-0.00013	-0.00012	0.00021		3	0	0	0	0	0	0	0	0		0	0	0	0	0	0	0	0		0	0	0	0	0	0	0	0		3	0	0	0	0	0	0	0	0
3.2	-0.00014	-0.00013	-0.00016	-9e-05	0.0001	-0.00013	-0.00012	0.00011		3.2	0	0	0	0	0	0	0	0		0	0	0	0	0	0	0	0		0	0	0	0	0	0	0	0		3.2	0	0	0	0	0	0	0	0
3.4	6e-05	0.00017	0.00034	-4e-05	0	0.00012	-7e-05	0.00011		3.4	0	0	0	0	0	0	0	0		0	0	0	0	0	0	0	0		0	0	0	0	0	0	0	0		3.4	0	0	0	0	0	0	0	0
3.6	1e-05	-3e-05	-6e-05	-9e-05	0	-0.00018	-7e-05	0.00016		3.6	0	0	0	0	0	0	0	0		0	0	0	0	0	0	0	0		0	0	0	0	0	0	0	0		3.6	0	0	0	0	0	0	0	0
3.8	-0.00014	2e-05	-1e-05	-4e-05	0.0002	7e-05	-2e-05	0.00011		3.8	0	0	0	0	0	0	0	0		0	0	0	0	0	0	0	0		0	0	0	0	0	0	0	0		3.8	0	0	0	0	0	0	0	0
4	1e-05	-8e-05	-0.00016	-9e-05	0	2e-05	-2e-05	6e-05		4	0	0	0	0	0	0	0	0		0	0	0	0	0	0	0	0		0	0	0	0	0	0	0	0		4	0	0	0	0	0	0	0	0
4.2	-4e-05	7e-05	-1e-05	-9e-05	-5e-05	-0.00018	-0.00017	6e-05		4.2	0	0	0	0	0	0	0	0		0	0	0	0	0	0	0	0		0	0	0	0	0	0	0	0		4.2	0	0	0	0	0	0	0	0
4.4	0.00011	7e-05	-0.00016	-9e-05	5e-05	-8e-05	3e-05	6e-05		4.4	0	0	0	0	0	0	0	0		0	0	0	0	0	0	0	0		0	0	0	0	0	0	0	0		4.4	0	0	0	0	0	0	0	0
4.6	-4e-05	-3e-05	-0.00021	-4e-05	5e-05	2e-05	3e-05	1e-05		4.6	0	0	0	0	0	0	0	0		0	0	0	0	0	0	0	0		0	0	0	0	0	0	0	0		4.6	0	0	0	0	0	0	0	0
4.8	-9e-05	-8e-05	4e-05	-4e-05	-5e-05	-0.00023	-2e-05	6e-05		4.8	0	0	0	0	0	0	0	0		0	0	0	0	0	0	0	0		0	0	0	0	0	0	0	0		4.8	0	0	0	0	0	0	0	0
5	0.00016	-8e-05	-6e-05	1e-05	-0.0002	-3e-05	3e-05	1e-05		5	0	0	0	0	0	0	0	0		0	0	0	0	0	0	0	0		0	0	0	0	0	0	0	0		5	0	0	0	0	0	0	0	0
5.2	-4e-05	7e-05	-0.00011	1e-05	5e-05	-3e-05	8e-05	1e-05		5.2	0	0	0	0	0	0	0	0		0	0	0	0	0	0	0	0		0	0	0	0	0	0	0	0		5.2	0	0	0	0	0	0	0	0
5.4	-0.00014	2e-05	9e-05	-9e-05	-0.0001	-0.00018	8e-05	1e-05		5.4	0	0	0	0	0	0	0	0		0	0	0	0	0	0	0	0		0	0	0	0	0	0	0	0		5.4	0	0	0	0	0	0	0	0
5.6	6e-05	-3e-05	-6e-05	-0.00019	-0.0001	-0.00013	0.00013	-9e-05		5.6	0	0	0	0	0	0	0	0		0	0	0	0	0	0	0	0		0	0	0	0	0	0	0	0		5.6	0	0	0	0	0	0	0	0
5.8	1e-05	-8e-05	-6e-05	1e-05	0.0001	-8e-05	0.00033	-4e-05		5.8	0	0	0	0	0	0	0	0		0	0	0	0	0	0	0	0		0	0	0	0	0	0	0	0		5.8	0	0	0	0	0	0	0	0
6	-0.00014	7e-05	-0.00021	-4e-05	-0.0001	-3e-05	3e-05	1e-05		6	0	0	0	0	0	0	0	0		0	0	0	0	0	0	0	0		0	0	0	0	0	0	0	0		6	0	0	0	0	0	0	0	0
6.2	6e-05	-3e-05	-1e-05	-4e-05	0	-0.00013	-0.00017	-4e-05		6.2	0	0	0	0	0	0	0	0		0	0	0	0	0	0	0	0		0	0	0	0	0	0	0	0		6.2	0	0	0	0	0	0	0	0
6.4	1e-05	-3e-05	4e-05	-4e-05	0.0002	2e-05	-0.00012	-4e-05		6.4	0	0	0	0	0	0	0	0		0	0	0	0	0	0	0	0		0	0	0	0	0	0	0	0		6.4	0	0	0	0	0	0	0	0
6.6	-0.00014	-0.00013	-0.00016	-4e-05	0	0.00032	-7e-05	1e-05		6.6	0	0	0	0	0	0	0	0		0	0	0	0	0	0	0	0		0	0	0	0	0	0	0	0		6.6	0	0	0	0	0	0	0	0
6.8	1e-05	2e-05	0.00014	-9e-05	0	-0.00013	-7e-05	-4e-05		6.8	0	0	0	0	0	0	0	0		0	0	0	0	0	0	0	0		0	0	0	0	0	0	0	0		6.8	0	0	0	0	0	0	0	0
7	-4e-05	2e-05	-6e-05	-9e-05	-0.00015	-0.00018	-2e-05	1e-05		7	0	0	0	0	0	0	0	0		0	0	0	0	0	0	0	0		0	0	0	0	0	0	0	0		7	0	0	0	0	0	0	0	0
7.2	6e-05	-0.00013	-6e-05	-4e-05	5e-05	-3e-05	-2e-05	-4e-05		7.2	0	0	0	0	0	0	0	0		0	0	0	0	0	0	0	0		0	0	0	0	0	0	0	0		7.2	0	0	0	0	0	0	0	0
7.4	1e-05	-0.00018	-0.00016	-9e-05	0	-0.00018	8e-05	-0.00014		7.4	0	0	0	0	0	0	0	0		0	0	0	0	0	0	0	0		0	0	0	0	0	0	0	0		7.4	0	0	0	0	0	0	0	0
7.6	-9e-05	0.00012	-6e-05	-0.00014	-0.0002	-8e-05	3e-05	-4e-05		7.6	0	0	0	0	0	0	0	0		0	0	0	0	0	0	0	0		0	0	0	0	0	0	0	0		7.6	0	0	0	0	0	0	0	0
7.8	0.00011	2e-05	-0.00026	-4e-05	5e-05	2e-05	3e-05	1e-05		7.8	0	0	0	0	0	0	0	0		0	0	0	0	0	0	0	0		0	0	0	0	0	0	0	0		7.8	0	0	0	0	0	0	0	0
8	-4e-05	-3e-05	-0.00021	-0.00014	-5e-05	-0.00018	-2e-05	-4e-05		8	0	0	0	0	0	0	0	0		0	0	0	0	0	0	0	0		0	0	0	0	0	0	0	0		8	0	0	0	0	0	0	0	0
8.2	-0.00014	-0.00018	4e-05	-0.00014	-0.0001	-3e-05	-2e-05	-9e-05		8.2	0	0	0	0	0	0	0	0		0	0	0	0	0	0	0	0		0	0	0	0	0	0	0	0		8.2	0	0	0	0	0	0	0	0
8.4	6e-05	7e-05	-6e-05	-0.00014	0.0001	2e-05	8e-05	-9e-05		8.4	0	0	0	0	0	0	0	0		0	0	0	0	0	0	0	0		0	0	0	0	0	0	0	0		8.4	0	0	0	0	0	0	0	0
8.6	1e-05	-3e-05	-0.00016	-9e-05	-5e-05	-0.00023	8e-05	-9e-05		8.6	0	0	0	0	0	0	0	0		0	0	0	0	0	0	0	0		0	0	0	0	0	0	0	0		8.6	0	0	0	0	0	0	0	0
8.8	-0.00014	-8e-05	0.00024	-0.00014	-5e-05	2e-05	8e-05	-0.00014		8.8	0	0	0	0	0	0	0	0		0	0	0	0	0	0	0	0		0	0	0	0	0	0	0	0		8.8	0	0	0	0	0	0	0	0
9	6e-05	-0.00013	-6e-05	-0.00014	0	-3e-05	0.00013	-0.00014		9	0	0	0	0	0	0	0	0		0	0	0	0	0	0	0	0		0	0	0	0	0	0	0	0		9	0	0	0	0	0	0	0	0
9.2	1e-05	0.00012	-6e-05	-0.00019	0	-0.00023	8e-05	-0.00014		9.2	0	0	0	0	0	0	0	0		0	0	0	0	0	0	0	0		0	0	0	0	0	0	0	0		9.2	0	0	0	0	0	0	0	0
9.4	-0.00014	-3e-05	-0.00021	-0.00019	0	-8e-05	-0.00012	-9e-05		9.4	0	0	0	0	0	0	0	0		0	0	0	0	0	0	0	0		0	0	0	0	0	0	0	0		9.4	0	0	0	0	0	0	0	0
9.6	-4e-05	-8e-05	4e-05	-0.00019	-0.00015	-0.00013	-0.00012	-0.00014		9.6	0	0	0	0	0	0	0	0		0	0	0	0	0	0	0	0		0	0	0	0	0	0	0	0		9.6	0	0	0	0	0	0	0	0
9.8	-4e-05	-0.00018	-1e-05	-0.00024	0	-0.00013	-0.00012	-0.00019		9.8	0	0	0	0	0	0	0	0		0	0	0	0	0	0	0	0		0	0	0	0	0	0	0	0		9.8	0	0	0	0	0	0	0	0
10	1e-05	7e-05	-0.00021	-0.00019	-0.0002	-0.00013	-7e-05	-0.00014		10	0	0	0	0	0	0	0	0		0	0	0	0	0	0	0	0		0	0	0	0	0	0	0	0		10	0	0	0	0	0	0	0	0
10.2	-4e-05	-3e-05	9e-05	-0.00019	-0.0002	-8e-05	-7e-05	-0.00014		10.2	0	0	0	0	0	0	0	0		0	0	0	0	0	0	0	0		0	0	0	0	0	0	0	0		10.2	0	0	0	0	0	0	0	0
10.4	-9e-05	-3e-05	-6e-05	-0.00024	5e-05	0.00027	-2e-05	-0.00019		10.4	0	0	0	0	0	0	0	0		0	0	0	0	0	0	0	0		0	0	0	0	0	0	0	0		10.4	0	0	0	0	0	0	0	0
10.6	0.00011	-0.00013	-0.00011	-0.00024	-0.0001	-0.00013	3e-05	-0.00014		10.6	0	0.0334	0	0	0	0	0	0		0	0.0334	0	0	0	0	0	0		0	0.0334	0	0	0	0	0	0		10.6	0	0.0334	0	0	0	0	0	0
10.8	-9e-05	0.00012	4e-05	-0.00024	-0.00015	-8e-05	-2e-05	-0.00019		10.8	0.0096	0.0355	0	0	0	0	0	0		0.0096	0.0315	0	0	0	0	0	0		0.0096	0.0316	0	0	0	0	0	0		10.8	0.0096	0.0653	0	0	0	0	0	0
11	-9e-05	0.01222	-6e-05	-0.00024	0.00015	2e-05	-2e-05	-0.00014		11	0.0346	0.0772	0	0	0	0	0	0		0.0346	0.0312	0	0	0	0	0	0		0.0346	0.0542	0	0	0	0	0	0		11	0.0345	0.0797	0	0	0	0	0	0
11.2	0.00856	0.01177	-6e-05	-0.00034	0	-0.00013	-7e-05	-9e-05		11.2	0.0522	0.0715	0.0307	0	0	0	0	0		0.035	0.0273	0.0395	0	0	0	0	0		0.0491	0.0656	0.031	0	0	0	0	0		11.2	0.0545	0.0709	0.0306	0	0	0	0	0
11.4	0.01061	0.01367	0.00559	-0.00024	-5e-05	-8e-05	8e-05	1e-05		11.4	0.053	0.0763	0.0283	0	0	0	0	0		0.0336	0.0253	0.042	0	0	0	0	0		0.0523	0.0765	0.0284	0	0	0	0	0		11.4	0.0534	0.0773	0.0282	0	0	0	0	0
11.6	0.01181	0.02292	0.01494	-0.00024	-0.0002	2e-05	3e-05	0.00011		11.6	0.0556	0.075	0.0295	0	0	0	0	0		0.0341	0.0228	0.0449	0.0279	0	0	0	0		0.0545	0.0713	0.0309	0	0	0	0	0		11.6	0.0553	0.0765	0.0297	0	0	0	0	0
11.8	0.01331	0.03092	0.01844	-0.00029	5e-05	-0.00023	-2e-05	0.00026		11.8	0.0555	0.0788	0.0314	0.0078	0	0.0306	0	0		0.0327	0.0256	0.0434	0.0256	0	0.0359	0	0		0.0547	0.0736	0.0341	0.0076	0	0.023	0	0		11.8	0.0563	0.0798	0.0322	0.0064	0	0.0362	0	0
12	0.01706	0.03382	0.01754	0.00066	0	0.00627	8e-05	0.00016		12	0.0613	0.082	0.0353	0.0081	0	0.0322	0	0		0.0343	0.0225	0.0448	0.027	0.0264	0.0399	0	0		0.0607	0.0746	0.0378	0.0067	0	0.0332	0	0		12	0.0628	0.0837	0.0387	0.0119	0	0.0328	0	0
12.2	0.01746	0.03642	0.01979	0.00136	-0.00015	0.01307	8e-05	0.00011		12.2	0.0639	0.0804	0.0431	0.0287	0.0224	0.0341	0.0147	0		0.0354	0.0238	0.0463	0.0263	0.03	0.0379	0.0231	0		0.0616	0.0758	0.0423	0.0259	0.0228	0.034	0.0089	0		12.2	0.0642	0.081	0.0448	0.0298	0.0221	0.0365	0.0138	0
12.4	0.02076	0.04367	0.02344	0.00266	0.0067	0.01547	0.00033	6e-05		12.4	0.0624	0.0795	0.041	0.0294	0.0218	0.0406	0.0053	0		0.0348	0.0244	0.0452	0.0286	0.0297	0.0408	0.0238	0		0.0613	0.0762	0.0421	0.0287	0.021	0.0376	0.0067	0		12.4	0.0625	0.0802	0.0405	0.0321	0.0245	0.0451	0.0058	0
12.6	0.02851	0.04817	0.02414	0.01246	0.0123	0.01622	0.00098	6e-05		12.6	0.0677	0.0835	0.0404	0.0291	0.026	0.0431	0.0074	0		0.0447	0.03	0.0446	0.0294	0.0333	0.0417	0.0278	0		0.0669	0.0804	0.0414	0.0277	0.0236	0.0434	0.0067	0		12.6	0.0675	0.0844	0.0404	0.0305	0.0277	0.0471	0.0112	0
12.8	0.03826	0.06057	0.02669	0.01386	0.01965	0.01752	0.00308	1e-05		12.8	0.0681	0.0876	0.0398	0.0308	0.0304	0.0441	0.0257	0		0.0505	0.0288	0.0454	0.0298	0.0343	0.0432	0.0286	0.025		0.0677	0.0819	0.041	0.0269	0.0276	0.0425	0.025	0		12.8	0.0689	0.0896	0.0408	0.0313	0.0314	0.0473	0.0274	0
13	0.04916	0.07412	0.02794	0.02156	0.02145	0.01862	0.00578	1e-05		13	0.0746	0.0876	0.0425	0.0305	0.0355	0.0449	0.03	0		0.0553	0.0289	0.0495	0.0302	0.0343	0.0454	0.0287	0.0279		0.0713	0.0835	0.0434	0.0277	0.0342	0.044	0.0279	0		13	0.0768	0.0877	0.0436	0.0319	0.0377	0.048	0.0312	0.0089
13.2	0.06541	0.07367	0.02954	0.01996	0.0256	0.01972	0.01258	-0.00124		13.2	0.0701	0.0865	0.0415	0.0338	0.0322	0.0462	0.0273	0.0199		0.0511	0.0298	0.0491	0.0367	0.0459	0.0475	0.0294	0.0279		0.0689	0.0844	0.0446	0.0302	0.0321	0.0451	0.0274	0.0196		13.2	0.0716	0.0867	0.0422	0.0352	0.0334	0.0492	0.03	0.0201
13.4	0.08311	0.08617	0.03114	0.02486	0.02465	0.02162	0.01458	0.01201		13.4	0.0703	0.0875	0.0419	0.0397	0.0354	0.0496	0.0285	0.0213		0.0509	0.0316	0.0487	0.0407	0.0455	0.051	0.041	0.0333		0.0677	0.0866	0.0457	0.0341	0.0317	0.0485	0.0288	0.0197		13.4	0.0711	0.0882	0.0425	0.0413	0.038	0.0531	0.0305	0.022
13.6	0.09356	0.10002	0.03409	0.02051	0.02425	0.02432	0.01683	0.01401		13.6	0.0704	0.0878	0.0446	0.0382	0.0388	0.0509	0.0311	0.0236		0.0519	0.0308	0.0515	0.0399	0.0429	0.0538	0.042	0.0347		0.0689	0.0846	0.0471	0.0363	0.0348	0.0503	0.0304	0.0223		13.6	0.0716	0.088	0.0465	0.0399	0.0406	0.0537	0.0365	0.0216
13.8	0.09211	0.11207	0.03734	0.02026	0.0322	0.03217	0.01813	0.01666		13.8	0.0711	0.088	0.0457	0.0371	0.0371	0.0494	0.035	0.0238		0.053	0.0326	0.0517	0.0405	0.042	0.0534	0.0403	0.0347		0.0698	0.086	0.0477	0.0374	0.0352	0.0521	0.0329	0.0201		13.8	0.071	0.0881	0.047	0.0382	0.0383	0.0535	0.039	0.0207
14	0.08721	0.10767	0.03649	0.02336	0.02875	0.03472	0.01658	0.01921		14	0.0689	0.0893	0.0459	0.0392	0.0369	0.0516	0.0342	0.0183		0.0525	0.0311	0.0515	0.0439	0.0412	0.0555	0.0416	0.0331		0.0687	0.0862	0.0485	0.0388	0.0349	0.0521	0.034	0.0164		14	0.0688	0.0911	0.0474	0.041	0.0382	0.0548	0.0361	0.0217
14.2	0.08866	0.08122	0.03739	0.02111	0.032	0.03662	0.02648	0.01711		14.2	0.0716	0.0916	0.0478	0.0377	0.0372	0.0522	0.0359	0.0204		0.0546	0.0311	0.0524	0.0434	0.0427	0.0542	0.0448	0.0344		0.0703	0.0866	0.0502	0.0394	0.0352	0.0523	0.0347	0.0189		14.2	0.0717	0.0926	0.0494	0.0396	0.0387	0.0556	0.0364	0.022
14.4	0.06751	0.05867	0.03899	0.02611	0.0382	0.03537	0.03343	0.01686		14.4	0.0745	0.0919	0.0478	0.0379	0.0392	0.0524	0.0355	0.0207		0.0556	0.0306	0.0529	0.046	0.0416	0.0561	0.0431	0.0365		0.0734	0.0869	0.051	0.0402	0.0365	0.0527	0.0348	0.0205		14.4	0.0755	0.0922	0.0489	0.0377	0.0412	0.0555	0.0371	0.0221
14.6	0.07586	0.06127	0.03879	0.02996	0.04085	0.03697	0.02658	0.01986		14.6	0.0739	0.091	0.047	0.039	0.0389	0.0537	0.0341	0.021		0.0571	0.0349	0.0525	0.0456	0.0447	0.0569	0.0444	0.0389		0.0721	0.0864	0.0519	0.041	0.0382	0.0533	0.0361	0.0212		14.6	0.0749	0.0918	0.0479	0.0399	0.0403	0.0576	0.0379	0.0218
14.8	0.07081	0.06082	0.03624	0.02856	0.0364	0.04277	0.02558	0.02331		14.8	0.0737	0.0901	0.046	0.043	0.04	0.0534	0.0362	0.0211		0.0554	0.0359	0.0528	0.0467	0.0456	0.0562	0.0451	0.0395		0.0716	0.0862	0.0527	0.0427	0.0392	0.053	0.0392	0.0219		14.8	0.0746	0.0911	0.0472	0.0451	0.0424	0.0571	0.0423	0.0211
15	0.05986	0.06542	0.03179	0.03486	0.04535	0.05187	0.03303	0.02011		15	0.0732	0.0918	0.0469	0.0441	0.0423	0.0535	0.0386	0.0207		0.0553	0.0384	0.0544	0.0467	0.0446	0.0565	0.0466	0.0404		0.0717	0.0885	0.0543	0.0437	0.0398	0.0529	0.0417	0.02		15	0.0751	0.0922	0.0481	0.0465	0.045	0.0566	0.0431	0.0209
15.2	0.05676	0.06552	0.03439	0.02776	0.04495	0.04847	0.03698	0.01876		15.2	0.073	0.0942	0.0472	0.0437	0.0426	0.0527	0.0405	0.0217		0.0543	0.046	0.0554	0.0472	0.0442	0.0583	0.0465	0.0407		0.0713	0.0907	0.0553	0.044	0.0404	0.0533	0.0423	0.0215		15.2	0.0743	0.0953	0.0482	0.0455	0.0441	0.0558	0.0445	0.0226
15.4	0.05421	0.06997	0.03574	0.03796	0.0441	0.04777	0.03878	0.02191		15.4	0.0764	0.0942	0.0486	0.0436	0.0421	0.0527	0.0418	0.0225		0.0561	0.0538	0.0569	0.046	0.0456	0.0567	0.0472	0.0408		0.0732	0.0913	0.0556	0.0439	0.0413	0.0532	0.0428	0.0264		15.4	0.0762	0.0944	0.0496	0.0453	0.0438	0.0557	0.0467	0.0244
15.6	0.05036	0.06872	0.03814	0.04091	0.0384	0.04587	0.03318	0.02261		15.6	0.0774	0.0928	0.0487	0.0439	0.0415	0.053	0.0434	0.022		0.0571	0.0591	0.0576	0.0473	0.0449	0.0562	0.0468	0.0418		0.0748	0.0913	0.0559	0.0445	0.0415	0.0535	0.0432	0.0278		15.6	0.0772	0.0941	0.0509	0.0459	0.043	0.0556	0.0472	0.0252
15.8	0.06066	0.07227	0.04424	0.03876	0.04365	0.04272	0.03988	0.02541		15.8	0.0764	0.0916	0.0506	0.0441	0.0419	0.0544	0.0431	0.0235		0.0565	0.0601	0.0583	0.0488	0.0455	0.057	0.0479	0.0426		0.075	0.0892	0.0578	0.045	0.0421	0.0543	0.0436	0.0251		15.8	0.0771	0.0942	0.053	0.0454	0.0435	0.0575	0.0455	0.0258
16	0.06731	0.07332	0.03969	0.04041	0.0455	0.04337	0.03938	0.02546		16	0.0756	0.0931	0.0515	0.0453	0.0432	0.0545	0.0433	0.0245		0.0559	0.0617	0.0591	0.0492	0.0471	0.0575	0.0491	0.0426		0.0749	0.0901	0.0594	0.0461	0.0428	0.0544	0.0448	0.025		16	0.0761	0.0943	0.0528	0.0468	0.0444	0.0578	0.0472	0.0262
16.2	0.06436	0.06372	0.04259	0.03921	0.0442	0.04602	0.04133	0.03281		16.2	0.0755	0.0923	0.0513	0.0462	0.044	0.0547	0.0443	0.025		0.055	0.0598	0.0586	0.0497	0.0465	0.0579	0.0502	0.0438		0.0742	0.0874	0.059	0.047	0.0434	0.0543	0.0458	0.0273		16.2	0.0767	0.0926	0.0521	0.0486	0.0448	0.0589	0.0479	0.0259
16.4	0.06821	0.07677	0.04159	0.04831	0.0434	0.04847	0.03748	0.03076		16.4	0.0757	0.0899	0.0509	0.0463	0.0439	0.0544	0.0447	0.0252		0.0555	0.0582	0.0594	0.0492	0.0462	0.0575	0.0504	0.0448		0.0748	0.086	0.0593	0.0469	0.0443	0.0539	0.0463	0.0277		16.4	0.0764	0.0914	0.0525	0.0493	0.045	0.0589	0.0485	0.0264
16.6	0.06966	0.08267	0.04069	0.04286	0.0529	0.05132	0.03973	0.02791		16.6	0.0739	0.0899	0.0502	0.0468	0.0442	0.0543	0.0447	0.0248		0.0541	0.0602	0.0578	0.0498	0.0465	0.0576	0.05	0.0449		0.0725	0.0853	0.0579	0.0475	0.0447	0.0538	0.0463	0.0252		16.6	0.0742	0.0911	0.0513	0.0499	0.0457	0.0588	0.0478	0.0262
16.8	0.07811	0.07867	0.04249	0.04676	0.05315	0.04997	0.03463	0.02311		16.8	0.0732	0.0895	0.0498	0.0465	0.0446	0.0541	0.0449	0.0245		0.0526	0.0596	0.0572	0.0492	0.0469	0.0562	0.0504	0.045		0.0713	0.0835	0.0576	0.0475	0.0444	0.0543	0.0467	0.027		16.8	0.0746	0.091	0.0506	0.0492	0.0469	0.0582	0.048	0.0262
17	0.08626	0.08157	0.03964	0.05101	0.0476	0.05247	0.04443	0.02456		17	0.0751	0.0886	0.05	0.0452	0.0449	0.0533	0.0453	0.025		0.0544	0.0593	0.0572	0.0477	0.0463	0.0546	0.0498	0.0445		0.0731	0.0831	0.0587	0.0473	0.0449	0.054	0.047	0.0293		17	0.0753	0.0887	0.0502	0.0473	0.0475	0.0575	0.0493	0.0262
17.2	0.08441	0.08422	0.03949	0.04191	0.04965	0.04977	0.04223	0.02706		17.2	0.0727	0.0882	0.0493	0.0454	0.0438	0.0528	0.0462	0.0254		0.0537	0.0577	0.0564	0.0482	0.0455	0.0542	0.0484	0.0448		0.0707	0.0832	0.0581	0.0476	0.0441	0.0535	0.0469	0.0291		17.2	0.0734	0.0875	0.0497	0.0474	0.0465	0.0567	0.051	0.0263
17.4	0.08701	0.08477	0.03994	0.04271	0.0484	0.05367	0.04253	0.02731		17.4	0.0718	0.0863	0.0499	0.0458	0.0431	0.0536	0.0466	0.0254		0.0524	0.0572	0.0552	0.048	0.045	0.0542	0.0487	0.0444		0.07	0.0819	0.057	0.0476	0.0435	0.0542	0.047	0.0257		17.4	0.0726	0.0872	0.05	0.0479	0.0455	0.0566	0.0505	0.0267
17.6	0.07881	0.08287	0.03749	0.03821	0.04505	0.05327	0.04738	0.03041		17.6	0.0714	0.0856	0.0503	0.046	0.0433	0.0528	0.047	0.0252		0.052	0.0566	0.0559	0.0475	0.0448	0.0541	0.049	0.0434		0.0701	0.082	0.0574	0.0472	0.0438	0.0535	0.0479	0.0272		17.6	0.0717	0.0868	0.0501	0.0484	0.0449	0.0558	0.0497	0.0267
17.8	0.07731	0.08347	0.03819	0.04576	0.0425	0.05247	0.04328	0.03136		17.8	0.0702	0.0849	0.0499	0.0457	0.0426	0.0529	0.0461	0.0252		0.0511	0.0562	0.0554	0.0468	0.0442	0.0536	0.0485	0.0431		0.0688	0.0809	0.0572	0.047	0.0434	0.0531	0.0471	0.0291		17.8	0.0709	0.0861	0.0496	0.0478	0.0439	0.0555	0.048	0.0271
18	0.07666	0.08562	0.03779	0.04756	0.0511	0.05212	0.04523	0.02721		18	0.0691	0.0853	0.05	0.0454	0.0417	0.0528	0.0457	0.0255		0.0507	0.0566	0.0551	0.0469	0.0435	0.0531	0.0479	0.0433		0.0676	0.081	0.0571	0.0473	0.0429	0.053	0.0467	0.0281		18	0.0688	0.0859	0.0501	0.0482	0.043	0.0551	0.0479	0.0281
18.2	0.07911	0.08342	0.03909	0.04761	0.051	0.05922	0.03873	0.02861		18.2	0.0689	0.0842	0.0506	0.0457	0.0421	0.0522	0.046	0.0249		0.0511	0.0547	0.0548	0.0462	0.0434	0.0526	0.0477	0.0433		0.067	0.0793	0.0566	0.047	0.043	0.0526	0.047	0.0255		18.2	0.0685	0.0847	0.0507	0.0475	0.0431	0.0551	0.0487	0.0281
18.4	0.07806	0.07852	0.03529	0.04041	0.0569	0.05532	0.04853	0.02506		18.4	0.0688	0.0827	0.0503	0.0453	0.0422	0.052	0.046	0.0247		0.0499	0.0541	0.0542	0.0456	0.0424	0.0521	0.0469	0.043		0.0667	0.0789	0.0559	0.0465	0.0427	0.0528	0.0463	0.0272		18.4	0.0691	0.0826	0.0502	0.0465	0.0431	0.0549	0.0493	0.0273
18.6	0.07841	0.07867	0.03644	0.05411	0.04695	0.05227	0.04578	0.02576		18.6	0.0681	0.0814	0.0498	0.0445	0.0418	0.0523	0.0459	0.025		0.0486	0.0531	0.0535	0.0455	0.0416	0.0521	0.0465	0.0424		0.0664	0.0781	0.0555	0.046	0.0424	0.0526	0.0462	0.0281		18.6	0.0689	0.082	0.049	0.0459	0.0428	0.0552	0.0493	0.0264
18.8	0.08076	0.08132	0.03479	0.04241	0.05105	0.05247	0.04353	0.02801		18.8	0.0679	0.08	0.049	0.0447	0.0415	0.0522	0.0462	0.0253		0.049	0.0523	0.0527	0.0449	0.0422	0.0513	0.0459	0.0418		0.0663	0.078	0.0552	0.0456	0.0422	0.0518	0.0463	0.0289		18.8	0.069	0.081	0.0484	0.0456	0.0434	0.0546	0.0489	0.0268
19	0.07706	0.08272	0.03654	0.04636	0.0543	0.06187	0.04563	0.02926		19	0.0682	0.0792	0.0483	0.0445	0.0418	0.0515	0.046	0.0226		0.0491	0.0521	0.0518	0.0444	0.0421	0.0504	0.0455	0.0418		0.0652	0.0775	0.0545	0.0457	0.042	0.0513	0.046	0.025		19	0.068	0.0799	0.0483	0.0459	0.0443	0.0538	0.0479	0.027
19.2	0.07726	0.07862	0.03274	0.04636	0.0486	0.06807	0.05043	0.02821		19.2	0.0672	0.0784	0.049	0.0446	0.0413	0.051	0.0457	0.0227		0.0481	0.0512	0.0515	0.0442	0.0413	0.0502	0.0453	0.0417		0.0659	0.076	0.0548	0.0455	0.0418	0.051	0.0457	0.026		19.2	0.0676	0.0792	0.049	0.0462	0.0443	0.0529	0.0477	0.0269
19.4	0.07906	0.07647	0.03329	0.03971	0.0493	0.05462	0.04203	0.02636		19.4	0.0664	0.0782	0.0496	0.0444	0.0414	0.0505	0.0456	0.0242		0.0476	0.0501	0.0517	0.0436	0.0407	0.0496	0.0448	0.0412		0.0653	0.0757	0.0545	0.0453	0.0418	0.0507	0.0456	0.0283		19.4	0.0673	0.0788	0.0486	0.0465	0.0434	0.0523	0.0475	0.0252
19.6	0.07561	0.08287	0.03539	0.04016	0.054	0.04997	0.04878	0.02656		19.6	0.0663	0.0776	0.0495	0.0444	0.0412	0.0503	0.0456	0.0258		0.0476	0.0505	0.0509	0.0433	0.0404	0.0494	0.0442	0.0402		0.0646	0.0752	0.054	0.0452	0.0414	0.0507	0.0454	0.0293		19.6	0.067	0.0779	0.0472	0.0469	0.0427	0.0515	0.0471	0.0229
19.8	0.06921	0.08357	0.03439	0.05011	0.05205	0.05162	0.03913	0.02651		19.8	0.067	0.0773	0.0487	0.0446	0.0411	0.0501	0.0457	0.0254		0.0472	0.0501	0.0499	0.0429	0.0399	0.0488	0.0439	0.0399		0.065	0.0745	0.0535	0.0452	0.0414	0.0506	0.0455	0.0267		19.8	0.0663	0.0773	0.0479	0.047	0.0419	0.0516	0.0467	0.0231
20	0.07251	0.07517	0.03359	0.04581	0.0475	0.06012	0.04643	0.02841		20	0.0657	0.0766	0.0485	0.0448	0.041	0.0503	0.0458	0.0205		0.0465	0.0496	0.05	0.0425	0.0398	0.0483	0.0435	0.0396		0.0643	0.0736	0.0535	0.0449	0.0415	0.0503	0.0454	0.0258		20	0.0658	0.0782	0.049	0.0462	0.0416	0.0518	0.0472	0.0263
20.2	0.07461	0.07322	0.03374	0.04361	0.04805	0.05912	0.04088	0.02961		20.2	0.0655	0.0769	0.0491	0.0449	0.0408	0.0505	0.0459	0.0223		0.0467	0.0495	0.0502	0.0421	0.0395	0.0478	0.0433	0.0394		0.0638	0.0731	0.0534	0.0447	0.0412	0.0502	0.045	0.0281		20.2	0.0654	0.0777	0.0497	0.0454	0.0413	0.0522	0.0479	0.0264
20.4	0.07411	0.07272	0.03259	0.04481	0.04695	0.05577	0.04968	0.02836		20.4	0.0643	0.0768	0.0496	0.0447	0.0409	0.0507	0.0456	0.0253		0.0464	0.0491	0.0495	0.0422	0.0388	0.0478	0.0431	0.0392		0.0639	0.0725	0.0535	0.0445	0.0411	0.0503	0.0448	0.0292		20.4	0.0653	0.0762	0.0487	0.0444	0.0407	0.0532	0.0477	0.0239
20.6	0.07051	0.06922	0.03459	0.04176	0.0447	0.05437	0.04268	0.02691		20.6	0.0649	0.0763	0.0488	0.0442	0.0409	0.0506	0.0454	0.0247		0.0456	0.0491	0.0492	0.0419	0.0385	0.0476	0.043	0.0389		0.0631	0.0719	0.0532	0.0443	0.0408	0.0502	0.0449	0.0273		20.6	0.0647	0.0758	0.0468	0.0441	0.0411	0.0528	0.0477	0.0249
20.8	0.07006	0.07247	0.03779	0.04531	0.04605	0.05012	0.03968	0.02541		20.8	0.0639	0.0759	0.047	0.0438	0.0407	0.05	0.0453	0.0212		0.0455	0.0486	0.0489	0.041	0.0385	0.0469	0.0426	0.0384		0.0633	0.0726	0.0526	0.0442	0.0407	0.0502	0.0448	0.025		20.8	0.0641	0.0755	0.0456	0.0442	0.0414	0.0519	0.0471	0.0249
21	0.07141	0.06942	0.03589	0.04281	0.04915	0.04652	0.04328	0.02396		21	0.0636	0.0755	0.0464	0.0437	0.0405	0.0495	0.0454	0.0215		0.046	0.0488	0.0487	0.041	0.0382	0.0465	0.0419	0.0383		0.0626	0.0729	0.052	0.0443	0.0405	0.0496	0.0448	0.0278		21	0.0639	0.0761	0.0456	0.045	0.0419	0.0505	0.0464	0.0247
21.2	0.06961	0.07017	0.03404	0.04411	0.0502	0.05617	0.03663	0.02631		21.2	0.0629	0.0751	0.047	0.0439	0.0406	0.0489	0.0454	0.0244		0.046	0.0483	0.0484	0.0409	0.0379	0.0464	0.0418	0.038		0.0623	0.0728	0.0517	0.044	0.0403	0.0492	0.0446	0.0283		21.2	0.0631	0.0759	0.046	0.0456	0.042	0.0499	0.0456	0.0247
21.4	0.06981	0.07657	0.03364	0.03941	0.05025	0.05207	0.04488	0.02836		21.4	0.063	0.0753	0.0474	0.0435	0.0402	0.0485	0.045	0.0246		0.0456	0.0476	0.0491	0.0408	0.0377	0.0465	0.0415	0.0375		0.0623	0.0727	0.0521	0.0436	0.0401	0.0492	0.0443	0.0258		21.4	0.0635	0.0753	0.046	0.0449	0.0412	0.0497	0.0455	0.0257
21.6	0.07291	0.08447	0.03209	0.04501	0.04885	0.04987	0.04598	0.02801		21.6	0.0624	0.0748	0.0466	0.0431	0.0398	0.0483	0.0448	0.0207		0.0452	0.0477	0.0483	0.0406	0.0376	0.0461	0.0413	0.0373		0.0623	0.0724	0.0518	0.0435	0.0399	0.0494	0.0443	0.025		21.6	0.0625	0.0745	0.0461	0.0442	0.0405	0.0498	0.046	0.0263
21.8	0.06981	0.07972	0.03409	0.04036	0.0446	0.05502	0.04103	0.02611		21.8	0.062	0.0735	0.0461	0.0428	0.0395	0.0487	0.0447	0.0216		0.0448	0.0474	0.0483	0.0407	0.0371	0.0464	0.0411	0.0371		0.0617	0.0718	0.0513	0.0434	0.0398	0.0494	0.0446	0.0275		21.8	0.0617	0.0743	0.0458	0.044	0.0398	0.0507	0.0463	0.0232
22	0.06906	0.07917	0.03089	0.04221	0.04585	0.05482	0.04388	0.02666		22	0.061	0.0732	0.0463	0.0429	0.0392	0.0488	0.0451	0.0241		0.0451	0.0475	0.048	0.0397	0.0373	0.0459	0.041	0.0367		0.0612	0.0709	0.0512	0.0432	0.0397	0.0491	0.0444	0.0279		22	0.0616	0.0738	0.0456	0.0432	0.0396	0.0508	0.0465	0.0242
22.2	0.06761	0.07577	0.03069	0.03986	0.0501	0.05122	0.03768	0.02606		22.2	0.0609	0.0731	0.0464	0.0426	0.0392	0.0487	0.0453	0.024		0.0442	0.0472	0.0472	0.0399	0.0371	0.0457	0.0404	0.0365		0.0604	0.0703	0.0511	0.043	0.0396	0.0487	0.0441	0.0235		22.2	0.061	0.0732	0.0451	0.0425	0.0394	0.0504	0.0463	0.0258
22.4	0.07041	0.07037	0.03219	0.04101	0.0436	0.04952	0.04458	0.03166		22.4	0.0606	0.0732	0.0464	0.0425	0.039	0.0483	0.0449	0.0205		0.0438	0.0464	0.0474	0.0399	0.0367	0.0452	0.0406	0.0368		0.0595	0.0702	0.051	0.0426	0.0394	0.0482	0.0439	0.0255		22.4	0.0603	0.0731	0.0442	0.0421	0.0392	0.0494	0.046	0.0272
22.6	0.06881	0.07157	0.03089	0.04486	0.04545	0.05312	0.03978	0.02636		22.6	0.0601	0.0724	0.0455	0.0419	0.039	0.0475	0.0443	0.0205		0.044	0.0461	0.0472	0.0392	0.0366	0.0449	0.0404	0.0365		0.0589	0.0694	0.0508	0.0423	0.0391	0.0479	0.0436	0.0272		22.6	0.0603	0.0724	0.0436	0.0422	0.0394	0.0479	0.0452	0.0258
22.8	0.06726	0.07132	0.02999	0.03686	0.0454	0.05347	0.04093	0.02656		22.8	0.06	0.0718	0.045	0.0417	0.0389	0.0467	0.0436	0.0235		0.044	0.0464	0.0465	0.0391	0.0362	0.045	0.0399	0.0362		0.0589	0.0691	0.0505	0.0421	0.0388	0.0477	0.0433	0.0274		22.8	0.0601	0.0716	0.0434	0.0429	0.0392	0.0467	0.0442	0.0234
23	0.06541	0.07512	0.03029	0.04761	0.0474	0.05477	0.03948	0.02391		23	0.0596	0.071	0.0449	0.042	0.0385	0.0462	0.0436	0.0238		0.0439	0.0463	0.0462	0.0389	0.0361	0.0445	0.0398	0.036		0.0586	0.069	0.0503	0.0418	0.0384	0.0474	0.0431	0.0256		23	0.0604	0.0708	0.0429	0.0427	0.0385	0.0468	0.0439	0.023
23.2	0.06816	0.07192	0.03129	0.03671	0.0513	0.04967	0.04133	0.02721		23.2	0.0601	0.0707	0.045	0.042	0.0382	0.046	0.0438	0.0186		0.0434	0.0468	0.0465	0.0387	0.036	0.0441	0.0397	0.0357		0.0584	0.0683	0.0501	0.0417	0.0381	0.0472	0.043	0.0249		23.2	0.0595	0.0704	0.0433	0.0427	0.038	0.0474	0.0444	0.0251
23.4	0.06706	0.07177	0.03264	0.04291	0.04185	0.05122	0.04348	0.02741		23.4	0.0594	0.0704	0.045	0.0419	0.0378	0.0464	0.0438	0.0202		0.0434	0.0459	0.0465	0.0386	0.0357	0.044	0.0393	0.0357		0.0585	0.0684	0.0502	0.0416	0.0379	0.0469	0.0429	0.0267		23.4	0.0589	0.0704	0.0442	0.0423	0.0377	0.0486	0.0447	0.0261
23.6	0.06556	0.07472	0.03154	0.04106	0.04105	0.04547	0.03843	0.02836		23.6	0.0591	0.0698	0.0452	0.0412	0.0375	0.0474	0.0438	0.0238		0.0436	0.046	0.0466	0.0387	0.0356	0.0441	0.0394	0.0357		0.0581	0.0683	0.0502	0.0414	0.0379	0.0467	0.0428	0.0275		23.6	0.0585	0.0699	0.045	0.0416	0.0377	0.0495	0.0442	0.0223
23.8	0.06931	0.07867	0.03239	0.03876	0.0415	0.04672	0.04058	0.02721		23.8	0.0585	0.0693	0.0454	0.0405	0.0374	0.0479	0.044	0.023		0.0433	0.0458	0.0462	0.0386	0.0354	0.0441	0.0392	0.0353		0.0577	0.0677	0.05	0.0413	0.0378	0.0467	0.0426	0.0227		23.8	0.0587	0.0695	0.0446	0.0409	0.0379	0.0501	0.0439	0.023
24	0.06516	0.07277	0.03154	0.04006	0.04555	0.04922	0.03828	0.02461		24	0.0583	0.0692	0.0451	0.0404	0.0375	0.0479	0.0441	0.019		0.0427	0.0459	0.0458	0.0382	0.0353	0.044	0.0391	0.0351		0.0573	0.0673	0.0496	0.041	0.0376	0.0466	0.0425	0.0235		24	0.0584	0.069	0.0432	0.0406	0.0383	0.0496	0.0439	0.0247
24.2	0.06541	0.06802	0.03074	0.03906	0.0509	0.04892	0.04143	0.02436		24.2	0.058	0.0688	0.0443	0.0407	0.0377	0.0472	0.0438	0.0193		0.0425	0.0455	0.0456	0.038	0.0352	0.0437	0.0391	0.035		0.0573	0.0667	0.0493	0.0406	0.0374	0.0466	0.0424	0.0262		24.2	0.0578	0.0686	0.0423	0.0404	0.038	0.0483	0.0437	0.0241
24.4	0.06706	0.07067	0.03139	0.03961	0.04015	0.04947	0.04038	0.02646		24.4	0.0583	0.0682	0.0437	0.0412	0.0379	0.046	0.043	0.0223		0.0425	0.045	0.0455	0.0375	0.0348	0.0434	0.0385	0.0348		0.0567	0.0664	0.049	0.0404	0.0371	0.0465	0.0423	0.0263		24.4	0.0579	0.0682	0.0422	0.0406	0.0377	0.0463	0.043	0.0194
24.6	0.06921	0.06927	0.03174	0.04081	0.04155	0.04947	0.03693	0.02791		24.6	0.0579	0.068	0.0438	0.0411	0.0377	0.0452	0.0422	0.0232		0.0426	0.0445	0.0453	0.0374	0.0346	0.0432	0.0383	0.0347		0.0563	0.0663	0.0487	0.0401	0.037	0.0461	0.0421	0.0217		24.6	0.0583	0.0683	0.0432	0.0413	0.0373	0.0446	0.0422	0.0193
24.8	0.06461	0.07117	0.03129	0.03836	0.03905	0.04907	0.04058	0.02486		24.8	0.0579	0.0674	0.0446	0.0406	0.0372	0.0445	0.0418	0.0221		0.0423	0.0447	0.0449	0.0373	0.0345	0.043	0.0381	0.0345		0.0563	0.0657	0.0487	0.04	0.0368	0.0457	0.0417	0.0236		24.8	0.0577	0.0678	0.0435	0.0411	0.0369	0.0438	0.0416	0.0222
25	0.06586	0.06962	0.03109	0.03606	0.04335	0.04432	0.04208	0.02516		25	0.0575	0.0674	0.0452	0.0402	0.037	0.0444	0.0421	0.0184		0.0417	0.0447	0.0448	0.0372	0.0343	0.0427	0.0381	0.0343		0.0567	0.0652	0.0487	0.04	0.0367	0.0452	0.0413	0.0259		25	0.0574	0.0668	0.0426	0.0408	0.0365	0.0441	0.0417	0.0243
25.2	0.06271	0.06442	0.03309	0.03996	0.04475	0.04727	0.03873	0.02496		25.2	0.0571	0.0672	0.0444	0.0402	0.0366	0.045	0.0428	0.0202		0.0418	0.0441	0.0449	0.037	0.0341	0.0426	0.0379	0.0341		0.0564	0.0649	0.0483	0.0399	0.0364	0.0451	0.0411	0.0264		25.2	0.0571	0.0669	0.0429	0.0403	0.0364	0.0458	0.0431	0.0232
25.4	0.06366	0.06572	0.03154	0.03616	0.0414	0.05037	0.03878	0.02496		25.4	0.0574	0.0667	0.044	0.0398	0.0364	0.0458	0.0432	0.0223		0.0419	0.0438	0.0447	0.0367	0.034	0.0426	0.0375	0.0339		0.0564	0.0647	0.0484	0.0397	0.0362	0.0451	0.0412	0.022		25.4	0.057	0.0672	0.0434	0.0398	0.0362	0.0475	0.0439	0.0217
25.6	0.06291	0.06462	0.03019	0.03946	0.04295	0.04717	0.04038	0.02716		25.6	0.057	0.0663	0.044	0.0395	0.0362	0.0459	0.043	0.0215		0.0414	0.0439	0.0442	0.0367	0.0337	0.0424	0.0374	0.0338		0.0563	0.0642	0.0484	0.0395	0.036	0.0452	0.0413	0.0231		25.6	0.057	0.0662	0.0432	0.0394	0.0361	0.0483	0.043	0.0228
25.8	0.06586	0.06857	0.03134	0.03446	0.0444	0.04312	0.03753	0.02371		25.8	0.0566	0.0654	0.0439	0.0396	0.0362	0.046	0.0425	0.0191		0.0413	0.0439	0.044	0.0367	0.0336	0.0422	0.0374	0.0337		0.0559	0.0642	0.0483	0.0395	0.0359	0.0452	0.0412	0.0252		25.8	0.0569	0.0657	0.0431	0.0393	0.0365	0.0482	0.0417	0.0242
26	0.06616	0.06957	0.03199	0.03601	0.0384	0.04022	0.03778	0.02631		26	0.0567	0.0657	0.0442	0.0397	0.0366	0.0455	0.042	0.022		0.0406	0.0433	0.0443	0.0363	0.0336	0.042	0.0374	0.0336		0.0553	0.0636	0.0481	0.0393	0.0359	0.0451	0.0411	0.0254		26	0.0566	0.0658	0.0425	0.0394	0.0371	0.0471	0.0412	0.0238
26.2	0.06071	0.06967	0.03084	0.03621	0.03635	0.04492	0.03953	0.02496		26.2	0.0561	0.0654	0.0441	0.0397	0.0366	0.0447	0.0414	0.0233		0.0408	0.043	0.0439	0.0361	0.0333	0.0418	0.037	0.0334		0.0551	0.0638	0.0479	0.0394	0.036	0.0449	0.0408	0.0221		26.2	0.0564	0.0657	0.0427	0.0392	0.0369	0.046	0.0412	0.0196
26.4	0.06276	0.07107	0.03059	0.03476	0.0376	0.04987	0.03623	0.02441		26.4	0.0562	0.065	0.0439	0.0397	0.0365	0.0446	0.0412	0.0215		0.0408	0.0429	0.0438	0.0361	0.0332	0.0419	0.0368	0.0334		0.0546	0.0632	0.0475	0.0391	0.0359	0.0446	0.0406	0.0233		26.4	0.0569	0.0647	0.0424	0.0395	0.0364	0.0447	0.0415	0.021
26.6	0.06461	0.06337	0.03094	0.03766	0.0405	0.04397	0.03733	0.02451		26.6	0.0563	0.0645	0.0436	0.0394	0.0362	0.0443	0.0415	0.0179		0.0407	0.0431	0.0432	0.0358	0.033	0.0415	0.0368	0.0332		0.055	0.0632	0.0475	0.039	0.0358	0.0445	0.0404	0.0264		26.6	0.0566	0.0646	0.0416	0.0403	0.036	0.0439	0.0418	0.0241
26.8	0.06291	0.06372	0.02989	0.03656	0.047	0.04287	0.03568	0.02191		26.8	0.0561	0.0646	0.0434	0.0395	0.0358	0.0443	0.0418	0.0197		0.04	0.0429	0.0432	0.0358	0.0329	0.0414	0.0366	0.033		0.0553	0.0632	0.0474	0.0389	0.0356	0.0443	0.0404	0.025		26.8	0.0562	0.0652	0.0414	0.0406	0.0357	0.0437	0.0414	0.0231
27	0.05966	0.06822	0.03214	0.03841	0.0413	0.04377	0.03543	0.02221		27	0.0559	0.0646	0.0434	0.0395	0.0358	0.0443	0.0418	0.0222		0.0402	0.0427	0.0433	0.0354	0.0326	0.041	0.0365	0.0329		0.0548	0.0626	0.0471	0.039	0.0354	0.0443	0.0404	0.0205		27	0.0561	0.0654	0.0422	0.0401	0.0358	0.0436	0.0409	0.0231
27.2	0.06446	0.06877	0.02984	0.03771	0.0394	0.04657	0.03998	0.02356		27.2	0.056	0.0646	0.0436	0.0394	0.0358	0.0443	0.0415	0.0178		0.0406	0.0429	0.043	0.0352	0.0326	0.0409	0.0362	0.0327		0.0548	0.0624	0.0473	0.0389	0.0354	0.0443	0.0404	0.0242		27.2	0.0561	0.0649	0.0428	0.0397	0.0357	0.0445	0.0412	0.0197
27.4	0.06561	0.06682	0.03174	0.03806	0.03765	0.04262	0.03428	0.02361		27.4	0.0559	0.0641	0.0436	0.0392	0.0359	0.0443	0.0413	0.0184		0.0402	0.0425	0.0429	0.0354	0.0324	0.0409	0.036	0.0326		0.0547	0.0624	0.0475	0.0387	0.0355	0.0441	0.0401	0.0254		27.4	0.0563	0.065	0.0427	0.0391	0.0355	0.0457	0.0416	0.0239
27.6	0.06211	0.07087	0.03374	0.03861	0.0442	0.04192	0.04008	0.02441		27.6	0.0558	0.064	0.0436	0.0388	0.0357	0.0444	0.0412	0.0219		0.04	0.0422	0.043	0.0351	0.0322	0.0407	0.0361	0.0325		0.0545	0.0623	0.0471	0.0387	0.0354	0.044	0.04	0.0258		27.6	0.0562	0.0647	0.0423	0.0386	0.0353	0.0465	0.0418	0.0235
27.8	0.06216	0.06657	0.02934	0.03636	0.0425	0.04047	0.03368	0.02471		27.8	0.0557	0.0639	0.0434	0.0388	0.0356	0.0443	0.0413	0.0226		0.04	0.0416	0.0428	0.0351	0.0322	0.0407	0.036	0.0323		0.0542	0.0621	0.0467	0.0386	0.0352	0.044	0.04	0.021		27.8	0.056	0.0643	0.042	0.0387	0.0354	0.0465	0.0417	0.02
28	0.06066	0.06622	0.03049	0.03886	0.04095	0.04487	0.03913	0.02276		28	0.0555	0.0637	0.0432	0.0392	0.0356	0.0443	0.0415	0.0204		0.0395	0.0415	0.0425	0.0351	0.032	0.0407	0.0358	0.0322		0.0543	0.0617	0.0466	0.0385	0.0352	0.0439	0.04	0.0236		28	0.0559	0.0637	0.0419	0.0391	0.0358	0.046	0.0413	0.0213
28.2	0.06221	0.06537	0.03129	0.03481	0.03705	0.04502	0.03293	0.02611		28.2	0.0555	0.0633	0.043	0.0391	0.0356	0.044	0.0412	0.0188		0.0391	0.0421	0.0419	0.0347	0.0321	0.0404	0.0357	0.0321		0.054	0.0609	0.0466	0.0384	0.035	0.0439	0.04	0.0258		28.2	0.0556	0.0636	0.0419	0.0392	0.0359	0.0451	0.0409	0.024
28.4	0.06071	0.06457	0.03234	0.03716	0.03525	0.04107	0.04073	0.02276		28.4	0.0553	0.063	0.043	0.0391	0.0356	0.0439	0.0407	0.0206		0.0391	0.0417	0.0418	0.0344	0.032	0.0402	0.0355	0.032		0.0539	0.0605	0.0464	0.0382	0.0349	0.0438	0.0397	0.0248		28.4	0.0552	0.0634	0.0415	0.0391	0.0359	0.0444	0.0407	0.0256
28.6	0.06111	0.06277	0.03239	0.03946	0.0409	0.04297	0.03578	0.02521		28.6	0.0551	0.063	0.0431	0.0387	0.0354	0.0437	0.0407	0.0233		0.0392	0.0412	0.042	0.0342	0.0317	0.0397	0.0353	0.032		0.0537	0.0602	0.0462	0.0382	0.0349	0.0436	0.0396	0.0206		28.6	0.055	0.0629	0.0414	0.0394	0.0356	0.0437	0.0408	0.0234
28.8	0.06111	0.05982	0.02999	0.03326	0.0371	0.04502	0.03608	0.02321		28.8	0.0548	0.0631	0.043	0.0386	0.0355	0.0437	0.041	0.0215		0.0389	0.0412	0.0417	0.0342	0.0313	0.0396	0.0351	0.0319		0.0536	0.0603	0.0461	0.0381	0.0348	0.0434	0.0396	0.023		28.8	0.055	0.0633	0.0411	0.0393	0.0354	0.0434	0.0409	0.0185
29	0.06246	0.06117	0.02999	0.03876	0.03765	0.04407	0.03348	0.02311		29	0.0549	0.0631	0.0429	0.0385	0.0352	0.0438	0.0411	0.0184		0.0389	0.041	0.0417	0.0341	0.0311	0.0398	0.0349	0.0316		0.0531	0.06	0.0458	0.038	0.0348	0.0432	0.0394	0.025		29	0.0549	0.0632	0.0412	0.0391	0.0352	0.0437	0.0408	0.0205
29.2	0.05706	0.06727	0.03174	0.03406	0.0342	0.04207	0.03653	0.02496		29.2	0.055	0.0627	0.0427	0.0386	0.0352	0.0438	0.041	0.0194		0.039	0.0408	0.0416	0.0338	0.0313	0.0396	0.0349	0.0313		0.0534	0.0602	0.046	0.0379	0.0346	0.0431	0.0393	0.0257		29.2	0.0553	0.0626	0.0417	0.0387	0.0349	0.0441	0.0406	0.0241
29.4	0.06121	0.06727	0.02949	0.03786	0.0358	0.04107	0.03613	0.02216		29.4	0.0549	0.0622	0.0425	0.0386	0.0351	0.0437	0.0406	0.0226		0.039	0.0412	0.0413	0.034	0.0311	0.0394	0.0347	0.0312		0.0534	0.0601	0.046	0.0377	0.0345	0.043	0.0394	0.0203		29.4	0.0549	0.0626	0.0417	0.0383	0.0348	0.0445	0.0406	0.0244
29.6	0.05911	0.06512	0.03379	0.03436	0.0394	0.04022	0.03458	0.02436		29.6	0.0547	0.0619	0.0424	0.0385	0.035	0.0436	0.0405	0.023		0.0386	0.0406	0.0413	0.0339	0.031	0.0393	0.0347	0.0313		0.0532	0.0599	0.0459	0.0378	0.0344	0.0431	0.0392	0.0216		29.6	0.0547	0.0628	0.0416	0.038	0.0346	0.045	0.0406	0.021
29.8	0.06011	0.06682	0.03284	0.03486	0.0406	0.04437	0.03343	0.02131		29.8	0.0542	0.0621	0.0427	0.0385	0.0352	0.0435	0.0405	0.0212		0.039	0.0407	0.0416	0.0337	0.0311	0.0392	0.0347	0.0313		0.053	0.0601	0.0457	0.0378	0.0343	0.043	0.0391	0.0245		29.8	0.0545	0.0625	0.0416	0.0379	0.0349	0.0449	0.0409	0.0216
30	0.05966	0.07052	0.02889	0.03951	0.04505	0.04197	0.03393	0.02361		30	0.0541	0.0619	0.0427	0.0383	0.0351	0.0433	0.0406	0.0179		0.0384	0.0405	0.0412	0.0337	0.031	0.0391	0.0346	0.0312		0.0528	0.0596	0.0455	0.0378	0.0344	0.043	0.0389	0.0254		30	0.0548	0.0622	0.0414	0.0382	0.0348	0.0446	0.0408	0.0236
30.2	0.06161	0.07612	0.02794	0.03181	0.04165	0.03877	0.03548	0.02586		30.2	0.054	0.0618	0.0424	0.0383	0.035	0.0434	0.0405	0.0217		0.0383	0.0404	0.0412	0.0337	0.0305	0.0393	0.0343	0.031		0.0525	0.0592	0.0454	0.0376	0.0344	0.043	0.0389	0.0213		30.2	0.0543	0.0615	0.041	0.0386	0.0348	0.0443	0.0405	0.0247
30.4	0.06101	0.06772	0.03264	0.03846	0.03925	0.04107	0.03428	0.02436		30.4	0.054	0.0612	0.0421	0.0381	0.0348	0.0433	0.0403	0.0223		0.0376	0.0404	0.041	0.0333	0.0305	0.039	0.0344	0.0309		0.0522	0.0591	0.0453	0.0374	0.0342	0.043	0.0388	0.0222		30.4	0.0541	0.0611	0.041	0.0384	0.0349	0.0439	0.0401	0.0199
30.6	0.05826	0.07232	0.03029	0.03391	0.041	0.04182	0.04083	0.02356		30.6	0.0537	0.0608	0.042	0.038	0.0347	0.0432	0.0402	0.0168		0.0376	0.0397	0.0407	0.033	0.0304	0.0388	0.034	0.0306		0.0521	0.0587	0.0451	0.0373	0.0341	0.0429	0.0388	0.0248		30.6	0.0541	0.0608	0.0409	0.0382	0.0349	0.0435	0.0399	0.0206
30.8	0.06001	0.07132	0.03089	0.03396	0.03875	0.04072	0.02983	0.02346		30.8	0.0539	0.0602	0.0419	0.0379	0.0346	0.043	0.04	0.0183		0.0374	0.0398	0.0404	0.0328	0.0304	0.0386	0.034	0.0305		0.0519	0.0583	0.0447	0.0372	0.0339	0.0426	0.0388	0.0245		30.8	0.0539	0.0607	0.0409	0.038	0.0348	0.0432	0.0402	0.0221
31	0.05866	0.07052	0.02904	0.03381	0.03685	0.04342	0.03828	0.02376		31	0.0536	0.0605	0.0418	0.0378	0.0346	0.0429	0.0399	0.0202		0.0375	0.0394	0.0399	0.0327	0.0301	0.0383	0.0337	0.0305		0.052	0.0582	0.0445	0.037	0.0338	0.0424	0.0385	0.02		31	0.0536	0.0602	0.0408	0.0376	0.0345	0.0431	0.0402	0.0219
31.2	0.05781	0.07362	0.02839	0.03061	0.0382	0.04752	0.02913	0.02351		31.2	0.0537	0.0601	0.0418	0.0376	0.0345	0.0427	0.0398	0.0226		0.0375	0.0392	0.0399	0.0327	0.03	0.0383	0.0337	0.0305		0.0521	0.0583	0.0445	0.0369	0.0338	0.0422	0.0384	0.0224		31.2	0.0536	0.0602	0.0406	0.0378	0.0343	0.0432	0.0401	0.0226
31.4	0.05936	0.07617	0.02894	0.03806	0.0407	0.04087	0.03713	0.02391		31.4	0.0536	0.0599	0.0419	0.0376	0.0344	0.0425	0.0398	0.0209		0.0375	0.0393	0.0399	0.0323	0.0299	0.0379	0.0335	0.0302		0.052	0.0578	0.0444	0.0368	0.0336	0.0422	0.0383	0.0241		31.4	0.0536	0.0604	0.0407	0.0376	0.0342	0.0433	0.0399	0.02
31.6	0.05861	0.06992	0.02784	0.03126	0.04035	0.03712	0.03233	0.02171		31.6	0.0534	0.0595	0.0417	0.0376	0.0342	0.0424	0.0398	0.0178		0.0374	0.0385	0.0398	0.0324	0.0297	0.0378	0.0332	0.0302		0.0521	0.058	0.0443	0.0368	0.0336	0.0421	0.0383	0.025		31.6	0.0537	0.0598	0.041	0.0376	0.034	0.0431	0.0397	0.0222
31.8	0.05646	0.07137	0.02949	0.03446	0.04045	0.03722	0.02918	0.02281		31.8	0.0529	0.0592	0.0418	0.0376	0.0342	0.0426	0.0397	0.0199		0.0374	0.0389	0.0399	0.0324	0.0295	0.0377	0.0332	0.03		0.0516	0.0576	0.0442	0.0369	0.0335	0.042	0.0383	0.0217		31.8	0.0533	0.0594	0.0408	0.0375	0.0339	0.0431	0.0396	0.0248
32	0.05936	0.07292	0.02984	0.03631	0.03635	0.04052	0.03813	0.02256		32	0.0526	0.0593	0.0417	0.0375	0.0343	0.0424	0.0397	0.0227		0.0369	0.0386	0.0397	0.0322	0.0295	0.0377	0.033	0.0298		0.0517	0.0577	0.0443	0.0369	0.0337	0.0419	0.0382	0.0214		32	0.0529	0.0595	0.0407	0.0375	0.0341	0.0432	0.0397	0.0219
32.2	0.05726	0.06657	0.02979	0.03276	0.03975	0.04292	0.03138	0.02606		32.2	0.0525	0.0587	0.0415	0.0375	0.0343	0.0424	0.0394	0.0218		0.0369	0.0389	0.0395	0.0323	0.0295	0.0378	0.0332	0.0297		0.0513	0.0574	0.0438	0.0367	0.0336	0.0418	0.0379	0.0243		32.2	0.0524	0.0591	0.0407	0.0374	0.0343	0.043	0.0399	0.0188
32.4	0.05766	0.06392	0.02984	0.03556	0.0365	0.04242	0.03693	0.02411		32.4	0.0524	0.0585	0.0413	0.0374	0.0344	0.0422	0.0394	0.0176		0.0366	0.0383	0.0392	0.032	0.0294	0.0374	0.0331	0.0297		0.0509	0.0569	0.0435	0.0367	0.0335	0.0419	0.0378	0.0251		32.4	0.0524	0.0587	0.0407	0.0373	0.0344	0.0426	0.0398	0.0217
32.6	0.05781	0.06422	0.03064	0.03301	0.039	0.03887	0.03263	0.02371		32.6	0.0519	0.0582	0.041	0.0372	0.0343	0.042	0.0392	0.0191		0.0364	0.0386	0.0393	0.0319	0.0292	0.0376	0.0329	0.0297		0.0509	0.0565	0.0435	0.0364	0.0334	0.0417	0.0379	0.0218		32.6	0.0518	0.0585	0.0402	0.0374	0.0342	0.0425	0.0396	0.0236
32.8	0.05606	0.06102	0.03024	0.03281	0.0426	0.03952	0.03323	0.02281		32.8	0.0516	0.0579	0.0412	0.0372	0.0342	0.0418	0.0391	0.0222		0.0361	0.0383	0.0389	0.0316	0.029	0.0372	0.0329	0.0296		0.0504	0.0562	0.0433	0.0363	0.0333	0.0416	0.0378	0.0211		32.8	0.0517	0.0583	0.0399	0.0375	0.0341	0.0424	0.0393	0.0245
33	0.05911	0.05952	0.03084	0.03396	0.0392	0.03977	0.03233	0.02136		33	0.0513	0.0581	0.0411	0.037	0.034	0.0416	0.0391	0.0211		0.0361	0.0386	0.039	0.0316	0.0287	0.0371	0.0325	0.0295		0.0501	0.0562	0.043	0.0362	0.0331	0.0415	0.0377	0.0238		33	0.0514	0.0582	0.0396	0.0371	0.0338	0.0422	0.039	0.0218
33.2	0.05706	0.05987	0.02869	0.03316	0.0393	0.04342	0.03408	0.02596		33.2	0.0514	0.0578	0.0407	0.037	0.0338	0.0414	0.0389	0.0195		0.0362	0.0381	0.0389	0.0311	0.0286	0.0367	0.0324	0.0293		0.05	0.0564	0.0429	0.036	0.033	0.0411	0.0374	0.0253		33.2	0.0513	0.0582	0.0393	0.0368	0.0336	0.042	0.0389	0.0201
33.4	0.05566	0.05787	0.02819	0.03431	0.0389	0.03677	0.03443	0.02316		33.4	0.0513	0.0578	0.0403	0.0368	0.0336	0.0413	0.0388	0.0175		0.0363	0.0381	0.0389	0.0313	0.0286	0.0368	0.0322	0.0291		0.0499	0.0558	0.0428	0.0358	0.033	0.0409	0.0373	0.0232		33.4	0.0513	0.0583	0.0392	0.0368	0.0335	0.0417	0.039	0.0227
33.6	0.05606	0.05802	0.02864	0.02896	0.0377	0.04067	0.03203	0.02311		33.6	0.0509	0.0575	0.04	0.0367	0.0335	0.0412	0.0387	0.0211		0.036	0.0379	0.0386	0.0312	0.0284	0.0366	0.0321	0.029		0.0499	0.0557	0.0427	0.0358	0.0327	0.0408	0.0371	0.0212		33.6	0.0508	0.058	0.039	0.0368	0.0334	0.0415	0.039	0.0241
33.8	0.05616	0.05917	0.02969	0.03311	0.0391	0.03682	0.03008	0.02276		33.8	0.0507	0.0569	0.0401	0.0366	0.0334	0.0412	0.0387	0.0222		0.036	0.0377	0.0385	0.0312	0.0284	0.0367	0.032	0.0289		0.0494	0.0554	0.0423	0.0358	0.0327	0.0407	0.037	0.0235		33.8	0.0509	0.0578	0.039	0.0368	0.0332	0.0416	0.0388	0.0229
34	0.05671	0.06047	0.03054	0.03286	0.0429	0.03922	0.03838	0.02316		34	0.0504	0.057	0.0402	0.0365	0.0333	0.0411	0.0385	0.0176		0.0358	0.0373	0.0384	0.031	0.0285	0.0365	0.0321	0.0288		0.0492	0.0553	0.0424	0.0357	0.0326	0.0406	0.0371	0.025		34	0.0505	0.0574	0.0386	0.0366	0.033	0.0415	0.0386	0.0206
34.2	0.05486	0.05972	0.02864	0.03146	0.0395	0.03892	0.02863	0.02171		34.2	0.0503	0.0571	0.0401	0.0364	0.0333	0.041	0.0384	0.0185		0.0357	0.0375	0.0383	0.031	0.0283	0.0364	0.0319	0.0288		0.0491	0.0547	0.0423	0.0356	0.0326	0.0405	0.037	0.0223		34.2	0.0503	0.057	0.0386	0.0364	0.033	0.0416	0.0383	0.0213
34.4	0.05591	0.05852	0.02769	0.03331	0.0366	0.03942	0.03468	0.02446		34.4	0.05	0.0564	0.0397	0.0363	0.0331	0.0408	0.0383	0.0193		0.0352	0.037	0.038	0.0308	0.0281	0.0364	0.0318	0.0287		0.049	0.0547	0.042	0.0355	0.0325	0.0405	0.0368	0.0206		34.4	0.0502	0.0566	0.0385	0.0363	0.033	0.0414	0.0384	0.0216
34.6	0.05341	0.05747	0.02889	0.03051	0.03725	0.04417	0.03183	0.02241		34.6	0.0498	0.0559	0.0393	0.0361	0.0329	0.0407	0.0381	0.0195		0.0352	0.0372	0.0381	0.0306	0.028	0.0363	0.0316	0.0286		0.0485	0.0542	0.0417	0.0354	0.0324	0.0404	0.0367	0.0232		34.6	0.0498	0.0563	0.0385	0.0363	0.033	0.0411	0.0384	0.0228
34.8	0.05356	0.05652	0.02864	0.03361	0.0397	0.03727	0.03123	0.02036		34.8	0.0498	0.0558	0.0393	0.0361	0.0329	0.0406	0.038	0.0195		0.0349	0.0371	0.0376	0.0303	0.0279	0.036	0.0315	0.0284		0.0483	0.0544	0.0416	0.0352	0.0323	0.0403	0.0367	0.0244		34.8	0.0497	0.0558	0.0386	0.0363	0.0329	0.0408	0.0384	0.0246
35	0.05476	0.05482	0.02704	0.02651	0.04025	0.03922	0.03588	0.02171		35	0.0492	0.0556	0.0394	0.0362	0.0328	0.0404	0.038	0.0206		0.0348	0.0365	0.0377	0.0304	0.0277	0.0359	0.0312	0.0283		0.0483	0.0537	0.0414	0.035	0.0321	0.04	0.0365	0.022		35	0.0493	0.056	0.0383	0.0361	0.0327	0.0407	0.0382	0.0238
35.2	0.05366	0.05547	0.02954	0.03546	0.0382	0.03662	0.02703	0.02286		35.2	0.0495	0.0555	0.0395	0.036	0.0327	0.0402	0.0379	0.0217		0.035	0.0369	0.0376	0.0301	0.0275	0.0356	0.0313	0.0283		0.0481	0.0539	0.0414	0.035	0.032	0.0398	0.0363	0.0199		35.2	0.049	0.0554	0.038	0.0359	0.0324	0.0406	0.038	0.0199
35.4	0.05456	0.05482	0.03084	0.03031	0.04155	0.03972	0.03533	0.02326		35.4	0.049	0.0553	0.039	0.0359	0.0326	0.04	0.0377	0.0174		0.0348	0.0362	0.0373	0.0301	0.0276	0.0357	0.0311	0.0281		0.048	0.0539	0.0413	0.0348	0.0319	0.0396	0.0361	0.0228		35.4	0.0494	0.0553	0.038	0.0358	0.0322	0.0406	0.0378	0.0222
35.6	0.05421	0.05647	0.03009	0.03031	0.03455	0.03802	0.03248	0.02221		35.6	0.0489	0.0553	0.0388	0.0357	0.0324	0.04	0.0375	0.0156		0.035	0.0359	0.0373	0.0301	0.0274	0.0354	0.031	0.028		0.0478	0.0535	0.041	0.0348	0.0318	0.0396	0.0361	0.0243		35.6	0.049	0.0551	0.0372	0.0356	0.0322	0.0404	0.0376	0.023
35.8	0.05401	0.05667	0.02969	0.03036	0.0313	0.04117	0.03283	0.01891		35.8	0.0487	0.0549	0.0386	0.0355	0.0324	0.0398	0.0375	0.0192		0.0345	0.0359	0.037	0.0299	0.0273	0.0352	0.031	0.028		0.0475	0.0529	0.0409	0.0348	0.0316	0.0395	0.036	0.0219		35.8	0.0485	0.0547	0.0373	0.0356	0.032	0.0402	0.0375	0.023
36	0.05351	0.05817	0.02669	0.02736	0.0355	0.04097	0.03093	0.02306		36	0.0482	0.0545	0.0386	0.0353	0.0323	0.0397	0.0374	0.0219		0.0343	0.0357	0.0368	0.03	0.0273	0.0354	0.0309	0.0279		0.0475	0.0528	0.0409	0.0346	0.0316	0.0395	0.036	0.0195		36	0.0483	0.0545	0.0373	0.0355	0.032	0.0399	0.0374	0.0191
36.2	0.05301	0.05837	0.02724	0.03006	0.0365	0.03422	0.03173	0.02161		36.2	0.0481	0.0538	0.0387	0.0353	0.0321	0.0396	0.0373	0.0206		0.0341	0.0351	0.0367	0.0296	0.0271	0.0351	0.0308	0.0279		0.0468	0.0521	0.0405	0.0345	0.0315	0.0394	0.0358	0.0226		36.2	0.0481	0.0536	0.0376	0.0351	0.032	0.0397	0.0372	0.0199
36.4	0.05176	0.05667	0.02779	0.03121	0.03755	0.03602	0.03103	0.02226		36.4	0.0477	0.0532	0.0384	0.0352	0.032	0.0394	0.0371	0.0185		0.0338	0.0351	0.0365	0.0295	0.0271	0.0348	0.0307	0.0277		0.0467	0.0516	0.0403	0.0343	0.0313	0.0393	0.0357	0.0236		36.4	0.0475	0.0533	0.0376	0.0349	0.0316	0.0397	0.0371	0.0222
36.6	0.05281	0.05737	0.02914	0.03061	0.03965	0.03572	0.03368	0.02046		36.6	0.0473	0.0527	0.038	0.035	0.0318	0.0392	0.0367	0.0188		0.0334	0.0349	0.0361	0.0293	0.0267	0.0347	0.0305	0.0276		0.0461	0.0512	0.04	0.0342	0.0312	0.039	0.0356	0.02		36.6	0.047	0.0529	0.0369	0.0347	0.0315	0.0397	0.0369	0.0228
36.8	0.05096	0.05397	0.02829	0.02821	0.0418	0.03792	0.02778	0.02231		36.8	0.0466	0.0523	0.0378	0.0348	0.0316	0.0392	0.0368	0.0223		0.033	0.0344	0.036	0.0291	0.0265	0.0346	0.0303	0.0275		0.0458	0.0509	0.0397	0.034	0.0311	0.0388	0.0355	0.0197		36.8	0.0467	0.0523	0.0368	0.0346	0.0313	0.0396	0.0369	0.0207
37	0.05161	0.05692	0.03119	0.03001	0.04035	0.03852	0.03528	0.02341		37	0.0464	0.052	0.0379	0.0345	0.0315	0.039	0.0368	0.0219		0.0329	0.0344	0.0357	0.0287	0.0263	0.0342	0.03	0.0273		0.0453	0.0506	0.0395	0.0338	0.0309	0.0386	0.0353	0.0224		37	0.0463	0.052	0.0367	0.0346	0.0311	0.0392	0.0367	0.0187
37.2	0.05136	0.05562	0.02674	0.02946	0.03655	0.03967	0.02833	0.02151		37.2	0.0459	0.0519	0.0379	0.0344	0.0312	0.0388	0.0368	0.0171		0.0325	0.0341	0.0353	0.0285	0.0261	0.0339	0.0298	0.0271		0.045	0.0502	0.0393	0.0335	0.0307	0.0383	0.0351	0.0234		37.2	0.0458	0.0518	0.0367	0.0342	0.031	0.039	0.0365	0.0218
37.4	0.05211	0.05352	0.02724	0.02906	0.03165	0.04022	0.03183	0.02061		37.4	0.0458	0.052	0.0377	0.0342	0.031	0.0385	0.0364	0.0187		0.0324	0.0342	0.0352	0.0283	0.0258	0.0337	0.0296	0.0269		0.0449	0.05	0.0392	0.0333	0.0304	0.0381	0.0348	0.022		37.4	0.0457	0.0515	0.0366	0.034	0.0305	0.0388	0.0362	0.0234
37.6	0.04886	0.05427	0.02629	0.02926	0.0303	0.03622	0.02833	0.02031		37.6	0.0457	0.0517	0.0372	0.034	0.0308	0.0383	0.0359	0.0224		0.0324	0.0336	0.0349	0.028	0.0256	0.0335	0.0294	0.0268		0.0446	0.0498	0.039	0.0331	0.0302	0.0379	0.0346	0.0209		37.6	0.0455	0.0516	0.0362	0.034	0.0305	0.0385	0.0359	0.0219
37.8	0.04936	0.05792	0.02549	0.02761	0.03255	0.04397	0.03038	0.02161		37.8	0.0456	0.0513	0.037	0.0339	0.0306	0.038	0.0356	0.0199		0.0324	0.0337	0.0349	0.028	0.0255	0.0334	0.0292	0.0266		0.0443	0.0496	0.0386	0.033	0.03	0.0378	0.0344	0.021		37.8	0.0453	0.0516	0.0357	0.0336	0.0303	0.0384	0.0357	0.0191
38	0.05146	0.05577	0.02839	0.03071	0.0358	0.03782	0.03033	0.01976		38	0.0455	0.051	0.0369	0.0336	0.0305	0.0378	0.0355	0.0175		0.032	0.0334	0.0346	0.0278	0.0252	0.0332	0.0291	0.0264		0.0441	0.0495	0.0385	0.0328	0.0298	0.0377	0.0343	0.0224		38	0.0453	0.0513	0.0358	0.0334	0.03	0.0381	0.0355	0.0196
38.2	0.05051	0.05482	0.02594	0.02916	0.0417	0.03412	0.02743	0.02036		38.2	0.0455	0.0512	0.0371	0.0335	0.0303	0.0378	0.0355	0.0159		0.0319	0.0336	0.0347	0.0278	0.0251	0.0331	0.029	0.0263		0.0441	0.0492	0.0385	0.0327	0.0297	0.0374	0.0342	0.0231		38.2	0.0455	0.0515	0.036	0.0332	0.0299	0.038	0.0353	0.0214
38.4	0.04991	0.05397	0.02804	0.03106	0.04155	0.03232	0.03133	0.02236		38.4	0.045	0.0508	0.0371	0.0334	0.0301	0.0377	0.0355	0.0199		0.0317	0.0335	0.0345	0.0275	0.0249	0.0329	0.0288	0.0261		0.044	0.0488	0.0384	0.0325	0.0295	0.0373	0.034	0.022		38.4	0.0448	0.0512	0.0359	0.0333	0.0298	0.0379	0.0353	0.0224
38.6	0.05086	0.05632	0.02604	0.02721	0.0383	0.03342	0.03173	0.02486		38.6	0.0447	0.0508	0.037	0.0333	0.03	0.0377	0.0354	0.0209		0.0314	0.0332	0.0345	0.0274	0.0249	0.0328	0.0287	0.026		0.0435	0.049	0.0382	0.0324	0.0293	0.0372	0.0338	0.02		38.6	0.0448	0.0508	0.0359	0.0333	0.0296	0.0379	0.0352	0.0215
38.8	0.04966	0.05182	0.02634	0.03246	0.03655	0.03627	0.02848	0.02376		38.8	0.0447	0.0506	0.0368	0.0331	0.0298	0.0375	0.0352	0.0202		0.0315	0.0333	0.0345	0.0273	0.0245	0.0327	0.0284	0.0259		0.0432	0.0488	0.0379	0.0323	0.0292	0.0371	0.0337	0.0216		38.8	0.0449	0.0507	0.0356	0.033	0.0296	0.0377	0.035	0.0213
39	0.04826	0.05702	0.02679	0.02681	0.0349	0.03582	0.02863	0.02281		39	0.0445	0.0501	0.0366	0.0329	0.0297	0.0374	0.0349	0.0168		0.0312	0.0329	0.0342	0.027	0.0245	0.0325	0.0284	0.0258		0.0433	0.0487	0.0378	0.032	0.0291	0.0369	0.0335	0.0224		39	0.0445	0.0501	0.0354	0.0328	0.0295	0.0376	0.0348	0.0207
39.2	0.05046	0.05842	0.02584	0.02666	0.03575	0.03737	0.03263	0.02151		39.2	0.0445	0.0497	0.0363	0.0328	0.0296	0.0374	0.0347	0.0179		0.031	0.0325	0.0341	0.027	0.0243	0.0326	0.0281	0.0256		0.0433	0.0483	0.0376	0.0319	0.029	0.0368	0.0334	0.0223		39.2	0.0443	0.0497	0.0353	0.0325	0.0293	0.0375	0.0347	0.02
39.4	0.05321	0.05922	0.02664	0.02796	0.0401	0.03537	0.02783	0.02031		39.4	0.0441	0.0493	0.0359	0.0327	0.0295	0.0373	0.0347	0.0188		0.031	0.0325	0.0337	0.0268	0.0242	0.0324	0.0282	0.0254		0.0432	0.0478	0.0373	0.0318	0.0288	0.0367	0.0333	0.0187		39.4	0.044	0.0494	0.035	0.0324	0.0292	0.0376	0.0347	0.0204
39.6	0.04871	0.06377	0.02514	0.02551	0.03565	0.03582	0.02938	0.02126		39.6	0.044	0.0489	0.0359	0.0327	0.0294	0.0371	0.0347	0.0198		0.0304	0.0323	0.0334	0.0268	0.0242	0.0323	0.028	0.0253		0.043	0.0472	0.0372	0.0316	0.0286	0.0366	0.0331	0.0205		39.6	0.0439	0.0491	0.035	0.0326	0.029	0.0375	0.0347	0.0199
39.8	0.04911	0.05957	0.02679	0.03236	0.037	0.03377	0.02788	0.02091		39.8	0.044	0.0486	0.0359	0.0325	0.0293	0.0368	0.0346	0.0183		0.0305	0.0322	0.0333	0.0265	0.024	0.032	0.0279	0.0252		0.0425	0.0474	0.0371	0.0315	0.0285	0.0364	0.0331	0.0218		39.8	0.0437	0.0487	0.0349	0.0324	0.0289	0.037	0.0345	0.02
40	0.05041	0.05472	0.02634	0.02646	0.0366	0.03282	0.02713	0.01926		40	0.0438	0.0486	0.0358	0.0324	0.0293	0.0365	0.0343	0.0149		0.0304	0.0318	0.0331	0.0262	0.024	0.0318	0.0277	0.0253		0.0425	0.0472	0.037	0.0313	0.0285	0.0362	0.0329	0.0229		40	0.0436	0.0484	0.0347	0.0322	0.0288	0.0367	0.0341	0.0201
40.2	0.04881	0.05652	0.02629	0.02731	0.0347	0.04232	0.02643	0.02076		40.2	0.0436	0.0488	0.0357	0.0322	0.029	0.0363	0.034	0.0185		0.0304	0.0322	0.0331	0.0262	0.0238	0.0316	0.0275	0.0251		0.0426	0.0471	0.0369	0.0312	0.0284	0.036	0.0328	0.0216		40.2	0.0438	0.0487	0.0344	0.032	0.0286	0.0365	0.0337	0.0198
40.4	0.04841	0.05487	0.02774	0.02831	0.03295	0.03822	0.02903	0.02131		40.4	0.0435	0.0487	0.0355	0.0321	0.0289	0.0362	0.0339	0.0202		0.0301	0.0315	0.0329	0.0261	0.0235	0.0314	0.0273	0.025		0.0425	0.0475	0.0366	0.0311	0.0283	0.0358	0.0326	0.0192		40.4	0.0434	0.0487	0.0343	0.0319	0.0286	0.0365	0.0338	0.0204
40.6	0.04766	0.05667	0.02789	0.02756	0.0367	0.03607	0.02778	0.02241		40.6	0.0437	0.0484	0.0356	0.032	0.0289	0.0362	0.0339	0.0189		0.0303	0.0317	0.0331	0.0261	0.0235	0.0314	0.0273	0.0248		0.0424	0.047	0.0364	0.0311	0.0282	0.0358	0.0325	0.0205		40.6	0.0434	0.0486	0.0345	0.0318	0.0285	0.0364	0.034	0.0206
40.8	0.04721	0.06067	0.02794	0.03046	0.0309	0.03502	0.02973	0.02001		40.8	0.0437	0.0479	0.0356	0.032	0.0287	0.0362	0.0339	0.0153		0.0302	0.0315	0.0328	0.0258	0.0233	0.0312	0.0271	0.0246		0.0423	0.0467	0.0364	0.031	0.028	0.0356	0.0324	0.0217		40.8	0.0436	0.0482	0.0346	0.0318	0.0283	0.0363	0.034	0.0191
41	0.04751	0.05772	0.02654	0.02591	0.03615	0.03672	0.02633	0.02281		41	0.0433	0.0479	0.0354	0.032	0.0287	0.0361	0.0338	0.0171		0.0302	0.031	0.0328	0.0259	0.0234	0.0313	0.0271	0.0245		0.0423	0.0463	0.0365	0.0309	0.028	0.0356	0.0323	0.0228		41	0.0433	0.0477	0.0345	0.0319	0.0283	0.0362	0.0337	0.0184
41.2	0.04621	0.05632	0.02804	0.03086	0.0345	0.03347	0.02623	0.02276		41.2	0.043	0.0475	0.0353	0.032	0.0287	0.0361	0.0336	0.0181		0.0302	0.0308	0.0326	0.0258	0.0232	0.0311	0.0269	0.0244		0.042	0.046	0.0363	0.0309	0.028	0.0356	0.0322	0.0215		41.2	0.043	0.0473	0.0342	0.0316	0.0283	0.0362	0.0333	0.0203
41.4	0.04901	0.05722	0.02584	0.02681	0.03525	0.03517	0.03278	0.02186		41.4	0.0426	0.0469	0.0352	0.0319	0.0287	0.0358	0.0335	0.0188		0.0299	0.0305	0.0324	0.0258	0.0233	0.031	0.0271	0.0244		0.0416	0.0454	0.036	0.0308	0.028	0.0355	0.0321	0.0196		41.4	0.0424	0.0468	0.0341	0.0315	0.0283	0.0361	0.0332	0.0223
41.6	0.04616	0.05732	0.03019	0.02941	0.037	0.03737	0.02398	0.01911		41.6	0.0422	0.0464	0.0352	0.0317	0.0287	0.0357	0.0333	0.0209		0.0294	0.0302	0.032	0.0257	0.0231	0.031	0.0268	0.0243		0.0412	0.0449	0.0358	0.0307	0.0279	0.0354	0.0321	0.0201		41.6	0.042	0.0462	0.0341	0.0314	0.0283	0.0361	0.0333	0.0212
41.8	0.04751	0.05757	0.02759	0.02486	0.0409	0.03592	0.03008	0.02216		41.8	0.0417	0.046	0.0349	0.0315	0.0285	0.0355	0.0333	0.0208		0.0292	0.0301	0.0319	0.0256	0.0231	0.0309	0.0269	0.0243		0.0408	0.0445	0.0355	0.0305	0.0278	0.0351	0.032	0.0211		41.8	0.0414	0.0458	0.0338	0.0313	0.0283	0.0359	0.0335	0.0192
42	0.04651	0.05722	0.02664	0.02466	0.0368	0.03602	0.02663	0.02251		42	0.0411	0.0457	0.0345	0.0314	0.0283	0.0353	0.0332	0.0175		0.0288	0.0303	0.0316	0.0252	0.0229	0.0306	0.0267	0.0243		0.0403	0.0444	0.0352	0.0303	0.0277	0.035	0.0319	0.0223		42	0.0411	0.0458	0.0337	0.0312	0.028	0.0356	0.0333	0.0174
42.2	0.04701	0.05592	0.02599	0.02581	0.0363	0.03312	0.03088	0.02486		42.2	0.0408	0.0459	0.0341	0.0312	0.0282	0.0351	0.033	0.0165		0.0286	0.03	0.0316	0.025	0.0227	0.0304	0.0265	0.0241		0.0398	0.0443	0.035	0.0301	0.0274	0.0348	0.0317	0.0203		42.2	0.0407	0.0457	0.0333	0.031	0.0278	0.0352	0.0329	0.019
42.4	0.04481	0.05592	0.02489	0.02851	0.03995	0.03222	0.02598	0.02061		42.4	0.0406	0.046	0.0341	0.0309	0.028	0.0349	0.0328	0.0178		0.0284	0.0301	0.0314	0.0247	0.0224	0.03	0.0262	0.024		0.0397	0.0444	0.0349	0.0298	0.0273	0.0344	0.0315	0.0187		42.4	0.0407	0.0457	0.0333	0.0307	0.0276	0.0349	0.0325	0.0212
42.6	0.04421	0.05387	0.02749	0.02531	0.0327	0.03582	0.02778	0.02011		42.6	0.0408	0.0459	0.0342	0.0307	0.0278	0.0346	0.0326	0.0184		0.0286	0.0302	0.0313	0.0246	0.0222	0.0299	0.026	0.0239		0.0396	0.0445	0.0348	0.0297	0.0271	0.0342	0.0312	0.0204		42.6	0.0407	0.0458	0.0333	0.0304	0.0273	0.0348	0.0323	0.0214
42.8	0.04621	0.05542	0.02629	0.02531	0.03665	0.03572	0.02648	0.01981		42.8	0.041	0.0457	0.0342	0.0306	0.0275	0.0345	0.0325	0.0181		0.0284	0.0297	0.0311	0.0244	0.0219	0.0296	0.0257	0.0236		0.0397	0.0441	0.0348	0.0296	0.0269	0.0341	0.031	0.0207		42.8	0.0408	0.0456	0.0332	0.0303	0.0271	0.0348	0.0323	0.02
43	0.04456	0.05572	0.02804	0.02791	0.0339	0.03392	0.02718	0.01891		43	0.0408	0.0453	0.0339	0.0306	0.0273	0.0343	0.0323	0.0177		0.0285	0.0292	0.0312	0.0244	0.0219	0.0297	0.0257	0.0234		0.0397	0.0438	0.0347	0.0295	0.0267	0.034	0.0308	0.022		43	0.0409	0.0454	0.0332	0.0303	0.027	0.0347	0.0323	0.0182
43.2	0.04536	0.05662	0.02909	0.02731	0.034	0.03707	0.02763	0.02031		43.2	0.0404	0.0448	0.0337	0.0306	0.0272	0.0343	0.0321	0.0156		0.0284	0.0291	0.0309	0.0242	0.0217	0.0294	0.0255	0.0234		0.0397	0.0433	0.0346	0.0295	0.0266	0.034	0.0307	0.0205		43.2	0.0405	0.0448	0.0329	0.0305	0.0269	0.0345	0.0322	0.0187
43.4	0.04536	0.05717	0.02584	0.02271	0.03775	0.03212	0.02333	0.01926		43.4	0.0403	0.0443	0.0337	0.0305	0.0272	0.0343	0.0319	0.0165		0.0284	0.0286	0.0307	0.0244	0.0218	0.0296	0.0255	0.0232		0.0391	0.0427	0.0344	0.0294	0.0265	0.034	0.0307	0.0187		43.4	0.0403	0.0441	0.0329	0.0304	0.0269	0.0345	0.0319	0.0189
43.6	0.04526	0.05107	0.02519	0.02486	0.03545	0.03772	0.02873	0.02021		43.6	0.0399	0.0435	0.0337	0.0302	0.0271	0.0342	0.0318	0.019		0.028	0.0281	0.0304	0.0243	0.0216	0.0295	0.0254	0.0231		0.0386	0.042	0.0342	0.0293	0.0265	0.0339	0.0307	0.0199		43.6	0.0397	0.0433	0.0328	0.0303	0.0269	0.0346	0.0317	0.0185
43.8	0.04491	0.05017	0.02444	0.02501	0.03235	0.03412	0.02478	0.02171		43.8	0.0393	0.0427	0.0334	0.0302	0.027	0.0342	0.0318	0.02		0.0273	0.0277	0.0301	0.0241	0.0217	0.0294	0.0255	0.0231		0.0382	0.0417	0.034	0.0291	0.0264	0.0338	0.0306	0.0203		43.8	0.039	0.0427	0.0328	0.03	0.0268	0.0344	0.0317	0.0166
44	0.04366	0.05042	0.02784	0.02721	0.03295	0.03297	0.02868	0.02026		44	0.0384	0.0419	0.033	0.03	0.0269	0.034	0.0318	0.0197		0.0269	0.0272	0.0298	0.0239	0.0215	0.0292	0.0253	0.023		0.0375	0.0411	0.0336	0.0289	0.0263	0.0335	0.0305	0.0212		44	0.0384	0.0421	0.0325	0.0297	0.0266	0.0342	0.0317	0.018
44.2	0.04346	0.05117	0.02584	0.02486	0.02755	0.03732	0.02468	0.01836		44.2	0.0379	0.0416	0.0327	0.0297	0.0268	0.0337	0.0317	0.0147		0.0264	0.0273	0.0295	0.0236	0.0213	0.0289	0.0251	0.023		0.0371	0.0405	0.0332	0.0287	0.0261	0.0332	0.0303	0.0195		44.2	0.0377	0.0417	0.032	0.0295	0.0265	0.0339	0.0316	0.0198
44.4	0.04191	0.04917	0.02734	0.02271	0.03405	0.03962	0.02978	0.02006		44.4	0.0374	0.0415	0.0325	0.0293	0.0266	0.0332	0.0315	0.0146		0.0259	0.0272	0.0291	0.0232	0.021	0.0285	0.0248	0.0229		0.0367	0.0405	0.0329	0.0284	0.0259	0.0329	0.0301	0.0183		44.4	0.0374	0.0415	0.0317	0.0291	0.0263	0.0336	0.0313	0.0204
44.6	0.04236	0.05162	0.02814	0.02316	0.0322	0.03412	0.02638	0.01831		44.6	0.0371	0.0415	0.0323	0.029	0.0264	0.0329	0.0312	0.0165		0.0255	0.0273	0.0288	0.0228	0.0207	0.0281	0.0246	0.0227		0.0363	0.0402	0.0326	0.0281	0.0257	0.0326	0.0299	0.0197		44.6	0.0371	0.0415	0.0313	0.0288	0.026	0.0331	0.0311	0.0188
44.8	0.04181	0.05282	0.02499	0.02526	0.02795	0.03042	0.02383	0.02191		44.8	0.0374	0.0413	0.0322	0.0287	0.026	0.0326	0.0308	0.0176		0.0255	0.027	0.0287	0.0225	0.0204	0.0278	0.0242	0.0225		0.0363	0.0402	0.0326	0.0279	0.0254	0.0324	0.0296	0.0201		44.8	0.0372	0.0414	0.0314	0.0286	0.0257	0.0328	0.0309	0.0164
45	0.04161	0.05257	0.02919	0.02811	0.02945	0.02867	0.02663	0.02076		45	0.0375	0.041	0.032	0.0287	0.0258	0.0324	0.0306	0.0166		0.0254	0.0268	0.0285	0.0222	0.0201	0.0275	0.0239	0.0223		0.0364	0.0399	0.0325	0.0277	0.0251	0.0322	0.0293	0.0208		45	0.0374	0.0411	0.0313	0.0284	0.0253	0.0326	0.0306	0.018
45.2	0.04136	0.05282	0.02564	0.02381	0.0282	0.03562	0.02343	0.01986		45.2	0.0373	0.0408	0.0319	0.0288	0.0255	0.0323	0.0303	0.0164		0.0257	0.0266	0.0284	0.0221	0.0199	0.0273	0.0237	0.022		0.0364	0.0395	0.0324	0.0276	0.0249	0.032	0.0291	0.0198		45.2	0.0373	0.0408	0.0312	0.0284	0.025	0.0324	0.0303	0.0186
45.4	0.04201	0.04907	0.02679	0.02286	0.03055	0.04152	0.02708	0.01881		45.4	0.0372	0.0404	0.0318	0.0287	0.0253	0.0322	0.0301	0.0166		0.0257	0.0263	0.0282	0.022	0.0196	0.0272	0.0235	0.0218		0.0362	0.0392	0.0323	0.0276	0.0247	0.0319	0.0289	0.0179		45.4	0.0371	0.0406	0.0312	0.0284	0.0249	0.0323	0.0299	0.0182
45.6	0.04096	0.04657	0.02409	0.02346	0.0317	0.03157	0.02508	0.01861		45.6	0.037	0.0404	0.032	0.0285	0.0252	0.0321	0.0299	0.0171		0.0256	0.026	0.028	0.0222	0.0195	0.0272	0.0235	0.0217		0.0358	0.0392	0.0321	0.0275	0.0246	0.0319	0.0288	0.0191		45.6	0.0368	0.0403	0.0311	0.0283	0.0248	0.0323	0.0297	0.0178
45.8	0.04031	0.04622	0.02449	0.02336	0.0264	0.03337	0.02783	0.02041		45.8	0.0367	0.0405	0.0321	0.0283	0.0252	0.032	0.0298	0.017		0.0255	0.0258	0.0279	0.0221	0.0195	0.0272	0.0235	0.0215		0.0355	0.039	0.032	0.0274	0.0246	0.0317	0.0287	0.0196		45.8	0.0365	0.0403	0.0311	0.0281	0.0248	0.0322	0.0297	0.0177
46	0.04161	0.04652	0.02734	0.02401	0.0329	0.03302	0.02508	0.01961		46	0.0363	0.0403	0.0319	0.0281	0.0251	0.0319	0.0298	0.0146		0.0253	0.0256	0.0278	0.022	0.0195	0.0271	0.0234	0.0214		0.0353	0.0389	0.032	0.0272	0.0245	0.0316	0.0286	0.0192		46	0.0361	0.0402	0.0309	0.0279	0.0248	0.0321	0.0297	0.0177
46.2	0.03976	0.04447	0.02319	0.02661	0.02725	0.03247	0.02528	0.02046		46.2	0.0359	0.0402	0.0316	0.028	0.025	0.0319	0.0297	0.0162		0.025	0.0257	0.0278	0.0218	0.0193	0.0269	0.0233	0.0213		0.0349	0.0388	0.0317	0.027	0.0244	0.0314	0.0285	0.0193		46.2	0.0357	0.0399	0.0308	0.0278	0.0246	0.032	0.0297	0.0186
46.4	0.04046	0.04407	0.02594	0.02486	0.02425	0.03172	0.02133	0.01751		46.4	0.0354	0.04	0.0312	0.0279	0.0248	0.0318	0.0296	0.0183		0.0248	0.0259	0.0277	0.0216	0.0191	0.0267	0.0232	0.0213		0.0346	0.0388	0.0313	0.0268	0.0242	0.0312	0.0283	0.0202		46.4	0.0354	0.0401	0.0307	0.0276	0.0245	0.0319	0.0295	0.0191
46.6	0.04031	0.04572	0.02469	0.02251	0.02345	0.02942	0.02243	0.01851		46.6	0.0353	0.04	0.0311	0.0276	0.0247	0.0316	0.0294	0.0194		0.0246	0.026	0.0276	0.0214	0.019	0.0266	0.0229	0.0211		0.0344	0.0389	0.031	0.0266	0.024	0.0311	0.0282	0.0196		46.6	0.0351	0.04	0.0305	0.0273	0.0243	0.0316	0.0292	0.0197
46.8	0.03886	0.04892	0.02339	0.02041	0.02365	0.03222	0.02438	0.01886		46.8	0.0354	0.04	0.031	0.0274	0.0246	0.0313	0.0292	0.0189		0.0244	0.0263	0.0276	0.0211	0.0187	0.0264	0.0227	0.021		0.0344	0.0388	0.0309	0.0264	0.0238	0.0309	0.028	0.0189		46.8	0.0352	0.0398	0.0306	0.027	0.0242	0.0314	0.0289	0.0195
47	0.04021	0.05087	0.02499	0.02331	0.02395	0.03592	0.02588	0.01876		47	0.0354	0.0398	0.031	0.0272	0.0244	0.0311	0.0289	0.0168		0.0243	0.0262	0.0275	0.0209	0.0185	0.0262	0.0225	0.0208		0.0346	0.0385	0.0309	0.0262	0.0237	0.0307	0.0278	0.0189		47	0.0353	0.0397	0.0304	0.0267	0.024	0.0313	0.0288	0.018
47.2	0.03741	0.04967	0.02414	0.02286	0.0246	0.03402	0.02273	0.01721		47.2	0.0357	0.0395	0.0309	0.0271	0.0242	0.031	0.0287	0.0134		0.0242	0.026	0.0275	0.0208	0.0183	0.0261	0.0223	0.0206		0.0346	0.0383	0.0309	0.0261	0.0235	0.0306	0.0276	0.018		47.2	0.0354	0.0394	0.0301	0.0267	0.0238	0.0312	0.0287	0.017
47.4	0.03836	0.05062	0.02554	0.02086	0.0278	0.03767	0.02628	0.01881		47.4	0.0357	0.0391	0.0307	0.0272	0.024	0.0309	0.0287	0.0137		0.0243	0.0257	0.0274	0.0208	0.0182	0.0261	0.0221	0.0204		0.0346	0.0379	0.0307	0.0261	0.0233	0.0306	0.0275	0.0185		47.4	0.0356	0.039	0.03	0.0269	0.0236	0.0311	0.0287	0.0144
47.6	0.03766	0.04887	0.02409	0.02411	0.02765	0.03007	0.02233	0.02046		47.6	0.0356	0.0387	0.0304	0.0272	0.0239	0.0308	0.0288	0.0141		0.0242	0.0255	0.0272	0.0207	0.0182	0.0261	0.0221	0.0202		0.0346	0.0376	0.0305	0.026	0.0232	0.0305	0.0274	0.0195		47.6	0.0356	0.0388	0.0297	0.027	0.0235	0.031	0.0287	0.0166
47.8	0.03826	0.04922	0.02369	0.02421	0.0294	0.02872	0.02458	0.01966		47.8	0.0355	0.0383	0.0303	0.0271	0.0238	0.0307	0.0287	0.0146		0.0241	0.0253	0.027	0.0208	0.0183	0.0261	0.0221	0.0201		0.0344	0.0372	0.0304	0.026	0.0232	0.0304	0.0274	0.0191		47.8	0.0353	0.0384	0.0295	0.0269	0.0234	0.0308	0.0284	0.0179
48	0.03711	0.04702	0.02474	0.02286	0.02785	0.02937	0.02208	0.02026		48	0.0354	0.0384	0.0301	0.027	0.0238	0.0306	0.0285	0.0157		0.0241	0.025	0.0267	0.0208	0.0183	0.026	0.0221	0.0201		0.0342	0.0371	0.0303	0.0259	0.0231	0.0302	0.0273	0.0185		48	0.0353	0.0384	0.0296	0.0267	0.0233	0.0307	0.0281	0.0194
48.2	0.03721	0.04657	0.02329	0.02546	0.027	0.03257	0.02243	0.01916		48.2	0.0351	0.0384	0.0301	0.0268	0.0238	0.0305	0.0283	0.0176		0.0242	0.0248	0.0266	0.0208	0.0184	0.0259	0.0221	0.0201		0.034	0.0371	0.0302	0.0258	0.0231	0.0301	0.0272	0.0178		48.2	0.035	0.0383	0.0295	0.0265	0.0233	0.0306	0.028	0.0189
48.4	0.03751	0.04737	0.02439	0.02136	0.02365	0.03802	0.02418	0.01816		48.4	0.035	0.0383	0.0301	0.0267	0.0238	0.0304	0.0282	0.0174		0.0241	0.0247	0.0265	0.0206	0.0184	0.0258	0.0221	0.0201		0.0338	0.037	0.03	0.0257	0.023	0.0299	0.0271	0.018		48.4	0.0347	0.0383	0.0296	0.0264	0.0234	0.0305	0.028	0.0186
48.6	0.03706	0.04752	0.02354	0.02216	0.02495	0.03542	0.02368	0.01846		48.6	0.0347	0.0382	0.03	0.0266	0.0237	0.0303	0.0282	0.0154		0.0241	0.0247	0.0265	0.0206	0.0183	0.0256	0.022	0.0201		0.0336	0.037	0.03	0.0255	0.023	0.0298	0.027	0.0184		48.6	0.0346	0.0381	0.0295	0.0264	0.0233	0.0304	0.028	0.0185
48.8	0.03841	0.04902	0.02329	0.02116	0.02645	0.03912	0.02313	0.01886		48.8	0.0346	0.038	0.0299	0.0265	0.0236	0.03	0.0281	0.0132		0.0239	0.0246	0.0265	0.0205	0.0182	0.0255	0.0218	0.0201		0.0335	0.0368	0.0299	0.0254	0.0229	0.0296	0.0269	0.0175		48.8	0.0346	0.038	0.0293	0.0263	0.0233	0.0302	0.028	0.0168
49	0.03731	0.04612	0.02369	0.02061	0.02715	0.03087	0.02403	0.01941		49	0.0347	0.0379	0.0298	0.0264	0.0236	0.0299	0.0279	0.015		0.0239	0.0245	0.0266	0.0204	0.018	0.0253	0.0217	0.02		0.0335	0.0367	0.0298	0.0253	0.0228	0.0296	0.0267	0.0172		49	0.0345	0.0379	0.0292	0.0262	0.0233	0.0301	0.0279	0.0143
49.2	0.03846	0.04617	0.02259	0.02056	0.0237	0.02712	0.02313	0.01986		49.2	0.0347	0.0377	0.0297	0.0263	0.0235	0.0298	0.0277	0.0179		0.0237	0.0245	0.0265	0.0203	0.0179	0.0253	0.0216	0.0199		0.0337	0.0365	0.0296	0.0252	0.0226	0.0295	0.0266	0.0167		49.2	0.0346	0.0377	0.029	0.0259	0.0231	0.03	0.0277	0.0156
49.4	0.03706	0.04487	0.02399	0.02216	0.02135	0.02922	0.02418	0.01976		49.4	0.0346	0.0375	0.0297	0.0262	0.0234	0.0297	0.0276	0.0183		0.0237	0.0247	0.0265	0.0202	0.0178	0.0253	0.0215	0.0197		0.0337	0.0363	0.0295	0.0252	0.0226	0.0294	0.0265	0.0175		49.4	0.0345	0.0376	0.0292	0.0259	0.023	0.03	0.0276	0.017
49.6	0.03711	0.04442	0.02314	0.02036	0.0226	0.02827	0.02128	0.01631		49.6	0.0345	0.0374	0.0297	0.0262	0.0233	0.0297	0.0276	0.0179		0.0236	0.0247	0.0264	0.0202	0.0178	0.0253	0.0214	0.0197		0.0334	0.0362	0.0294	0.0251	0.0225	0.0293	0.0264	0.0187		49.6	0.0344	0.0375	0.0292	0.0259	0.0229	0.03	0.0275	0.0176
49.8	0.03671	0.04532	0.02229	0.02226	0.02245	0.03147	0.02123	0.01711		49.8	0.0343	0.0372	0.0297	0.0262	0.0232	0.0297	0.0276	0.0164		0.0238	0.0246	0.0263	0.0202	0.0177	0.0253	0.0214	0.0196		0.0333	0.0362	0.0294	0.0251	0.0225	0.0293	0.0263	0.0185		49.8	0.0342	0.0373	0.0293	0.026	0.0229	0.03	0.0275	0.0177
50	0.03686	0.04547	0.02319	0.02141	0.02015	0.02962	0.02373	0.01796		50	0.034	0.0372	0.0296	0.0262	0.0231	0.0296	0.0276	0.0161		0.0238	0.0247	0.0262	0.0201	0.0178	0.0252	0.0215	0.0195		0.0332	0.0359	0.0294	0.0251	0.0225	0.0292	0.0263	0.0185		50	0.0341	0.0372	0.0292	0.0259	0.0228	0.0298	0.0274	0.0165
50.2	0.03636	0.04502	0.02194	0.02051	0.0208	0.03052	0.02278	0.01791		50.2	0.0338	0.0373	0.0294	0.026	0.0231	0.0294	0.0274	0.0162		0.0239	0.0246	0.0261	0.0202	0.0178	0.0251	0.0215	0.0195		0.033	0.0361	0.0293	0.0249	0.0224	0.0291	0.0262	0.0176		50.2	0.0338	0.0372	0.0289	0.0258	0.0227	0.0296	0.0273	0.0161
50.4	0.03666	0.04512	0.02359	0.02121	0.02165	0.03057	0.02173	0.01796		50.4	0.0337	0.0374	0.0293	0.0258	0.023	0.0292	0.0272	0.0162		0.0238	0.0246	0.0261	0.0202	0.0177	0.0251	0.0215	0.0196		0.0327	0.0361	0.0292	0.0248	0.0223	0.029	0.0261	0.0169		50.4	0.0336	0.0374	0.0288	0.0255	0.0227	0.0294	0.0271	0.0172
50.6	0.03656	0.04597	0.02259	0.02006	0.021	0.02977	0.02353	0.01736		50.6	0.0336	0.0377	0.0292	0.0256	0.0229	0.0291	0.027	0.0157		0.0238	0.0247	0.0262	0.0202	0.0177	0.025	0.0214	0.0196		0.0326	0.0364	0.029	0.0247	0.0222	0.0289	0.026	0.0171		50.6	0.0334	0.0378	0.0287	0.0254	0.0226	0.0294	0.0269	0.0177
50.8	0.03591	0.04742	0.02209	0.02186	0.0216	0.03182	0.02178	0.01991		50.8	0.0335	0.0381	0.0291	0.0255	0.0228	0.0291	0.0269	0.0157		0.0238	0.0248	0.0263	0.02	0.0177	0.025	0.0213	0.0196		0.0326	0.0366	0.029	0.0246	0.0221	0.0288	0.0258	0.0174		50.8	0.0335	0.0382	0.0286	0.0254	0.0225	0.0293	0.0269	0.0186
51	0.03661	0.04502	0.02324	0.02086	0.02245	0.03152	0.01913	0.01971		51	0.0336	0.0381	0.0291	0.0255	0.0227	0.029	0.0269	0.0157		0.0239	0.0248	0.0264	0.02	0.0176	0.025	0.0212	0.0194		0.0327	0.0368	0.0289	0.0245	0.022	0.0287	0.0257	0.0183		51	0.0337	0.0381	0.0287	0.0253	0.0225	0.0293	0.0269	0.0181
51.2	0.03691	0.04547	0.02159	0.01971	0.02135	0.02647	0.02303	0.02031		51.2	0.0339	0.038	0.0291	0.0255	0.0226	0.029	0.0269	0.0157		0.024	0.0249	0.0266	0.02	0.0175	0.0249	0.0211	0.0194		0.0328	0.0367	0.029	0.0245	0.0219	0.0287	0.0257	0.0187		51.2	0.034	0.0382	0.0288	0.0253	0.0223	0.0292	0.0269	0.0179
51.4	0.03546	0.04557	0.02244	0.02181	0.02205	0.02972	0.02193	0.02046		51.4	0.0341	0.0379	0.0292	0.0255	0.0225	0.0289	0.0268	0.0157		0.0238	0.0251	0.0265	0.02	0.0175	0.0249	0.0211	0.0193		0.0329	0.0367	0.029	0.0244	0.0218	0.0287	0.0257	0.018		51.4	0.0339	0.0381	0.0287	0.0253	0.0222	0.0292	0.0268	0.018
51.6	0.03576	0.04642	0.02404	0.02146	0.02235	0.02922	0.02388	0.01896		51.6	0.0341	0.0379	0.0291	0.0254	0.0224	0.0289	0.0267	0.0157		0.0238	0.025	0.0264	0.02	0.0175	0.025	0.021	0.0192		0.033	0.0364	0.0289	0.0245	0.0218	0.0287	0.0257	0.0183		51.6	0.0341	0.0379	0.0287	0.0252	0.0222	0.0293	0.0267	0.0178
51.8	0.03586	0.04797	0.02289	0.02006	0.02185	0.02937	0.02093	0.01836		51.8	0.0341	0.0377	0.0291	0.0254	0.0224	0.029	0.0266	0.0158		0.0238	0.025	0.0265	0.02	0.0175	0.0251	0.0211	0.0191		0.0331	0.0363	0.0288	0.0245	0.0218	0.0287	0.0256	0.0178		51.8	0.0342	0.0379	0.0288	0.0254	0.0222	0.0294	0.0266	0.0168
52	0.03501	0.04752	0.02319	0.02046	0.0208	0.02997	0.02158	0.01981		52	0.0341	0.0376	0.029	0.0254	0.0224	0.0291	0.0266	0.0159		0.0238	0.0251	0.0264	0.02	0.0176	0.0251	0.0211	0.0191		0.0329	0.0363	0.0287	0.0245	0.0218	0.0287	0.0256	0.018		52	0.034	0.0377	0.0287	0.0254	0.0223	0.0294	0.0267	0.0162
52.2	0.03546	0.04912	0.02194	0.02091	0.02045	0.03017	0.02178	0.01926		52.2	0.034	0.0377	0.029	0.0255	0.0225	0.029	0.0268	0.0159		0.0238	0.025	0.0262	0.02	0.0176	0.0251	0.0211	0.0191		0.0329	0.0364	0.0287	0.0244	0.0218	0.0287	0.0256	0.0174		52.2	0.034	0.0377	0.0287	0.0254	0.0223	0.0295	0.0267	0.0158
52.4	0.03521	0.04737	0.02169	0.01841	0.0239	0.02692	0.02103	0.01861		52.4	0.0339	0.0378	0.0289	0.0255	0.0225	0.0289	0.0268	0.0159		0.0238	0.0253	0.0263	0.0201	0.0176	0.0251	0.0211	0.0191		0.0329	0.0365	0.0287	0.0244	0.0218	0.0286	0.0256	0.0166		52.4	0.034	0.0381	0.0286	0.0252	0.0222	0.0294	0.0267	0.0158
52.6	0.03626	0.04582	0.02124	0.02091	0.02195	0.02807	0.02208	0.01851		52.6	0.034	0.0383	0.0288	0.0254	0.0225	0.0289	0.0267	0.0159		0.0239	0.0253	0.0263	0.02	0.0176	0.0251	0.0212	0.0192		0.033	0.0368	0.0287	0.0243	0.0218	0.0285	0.0256	0.0163		52.6	0.0339	0.0384	0.0283	0.0252	0.0223	0.0292	0.0267	0.0164
52.8	0.03581	0.04652	0.02089	0.01956	0.0249	0.02677	0.01973	0.01776		52.8	0.034	0.0386	0.0287	0.0253	0.0225	0.0287	0.0266	0.016		0.0241	0.0255	0.0265	0.02	0.0176	0.0251	0.0212	0.0192		0.033	0.037	0.0287	0.0243	0.0217	0.0285	0.0256	0.0167		52.8	0.034	0.0387	0.0285	0.0252	0.0223	0.0292	0.0266	0.0177
53	0.03491	0.04637	0.02209	0.02011	0.02285	0.02792	0.02118	0.01771		53	0.0342	0.0387	0.0288	0.0253	0.0224	0.0287	0.0265	0.0161		0.0242	0.0256	0.0267	0.02	0.0175	0.0251	0.0211	0.0192		0.0331	0.0374	0.0287	0.0243	0.0217	0.0285	0.0255	0.0182		53	0.0342	0.0389	0.0285	0.0251	0.0222	0.0291	0.0266	0.018
53.2	0.03616	0.04622	0.02224	0.02271	0.02095	0.02667	0.02258	0.01946		53.2	0.0344	0.039	0.0289	0.0253	0.0224	0.0288	0.0264	0.0162		0.0243	0.0257	0.0268	0.0201	0.0175	0.0251	0.0211	0.0192		0.0333	0.0378	0.0287	0.0243	0.0217	0.0285	0.0254	0.0177		53.2	0.0345	0.0393	0.0285	0.0252	0.0223	0.0291	0.0266	0.0179
53.4	0.03596	0.04532	0.02189	0.01976	0.0215	0.03032	0.02058	0.01801		53.4	0.0347	0.0392	0.0289	0.0253	0.0225	0.0288	0.0265	0.0163		0.0245	0.026	0.027	0.0202	0.0176	0.0253	0.0211	0.0192		0.0336	0.0379	0.0288	0.0243	0.0217	0.0286	0.0253	0.0173		53.4	0.0348	0.0394	0.0287	0.0252	0.0223	0.0292	0.0265	0.0176
53.6	0.03526	0.04432	0.02264	0.02166	0.0201	0.02722	0.02048	0.01836		53.6	0.035	0.0396	0.029	0.0254	0.0225	0.0289	0.0265	0.0164		0.0246	0.0261	0.027	0.0203	0.0177	0.0253	0.0212	0.0192		0.0339	0.0383	0.029	0.0244	0.0217	0.0287	0.0253	0.0169		53.6	0.035	0.0397	0.0287	0.0253	0.0222	0.0293	0.0265	0.0173
53.8	0.03596	0.04552	0.02119	0.01961	0.02185	0.02632	0.01963	0.01791		53.8	0.0352	0.0398	0.0291	0.0255	0.0225	0.029	0.0266	0.0166		0.0249	0.0262	0.0272	0.0205	0.0179	0.0255	0.0213	0.0192		0.0341	0.0384	0.029	0.0245	0.0217	0.0288	0.0254	0.0167		53.8	0.0351	0.0396	0.0287	0.0254	0.0223	0.0295	0.0266	0.0172
[truncated: 32 more rows]
