# Supplementary material for: Application of different building representation techniques in HEC-RAS 2-D for urban flood modeling using the Toce River experimental case
Source: PeerJ. 2021 Jul 2;9:e11667. doi: 10.7717/peerj.11667 (PMC8256810; doi:10.7717/peerj.11667)
Supplement: Supplemental Information 3 [file peerj-09-11667-s003.xlsx]

## Sheet: BR_Technique_(1B)
t	S3	S4	S5	S6	S7	S8	S9	S10			t	HEC_M10_P3	HEC_M10_P4	HEC_M10_P5	HEC_M10_P6	HEC_M10_P7	HEC_M10_P8	HEC_M10_P9	HEC_M10_P10		HEC_M0.1_P3	HEC_M0.1_P4	HEC_M0.1_P5	HEC_M0.1_P6	HEC_M0.1_P7	HEC_M0.1_P8	HEC_M0.1_P9	HEC_M0.1_P10		HEC_M1_P3	HEC_M1_P4	HEC_M1_P5	HEC_M1_P6	HEC_M1_P7	HEC_M1_P8	HEC_M1_P9	HEC_M1_P10			t	HEC_P3	HEC_P4	HEC_P5	HEC_P6	HEC_P7	HEC_P8	HEC_P9	HEC_P10
0	-1e-05	-4e-05	0	-0.00015	-2e-05	-7e-05	3e-05	1e-05			0	0	0	0	0	0	0	0	0		0	0	0	0	0	0	0	0		0	0	0	0	0	0	0	0			0	0	0	0	0	0	0	0	0
0.2	-6e-05	1e-05	-5e-05	0.00015	8e-05	0.00013	-0.00017	1e-05			0.2	0	0	0	0	0	0	0	0		0	0	0	0	0	0	0	0		0	0	0	0	0	0	0	0			0.2	0	0	0	0	0	0	0	0
0.4	0.00014	0.00011	5e-05	5e-05	3e-05	3e-05	-2e-05	1e-05			0.4	0	0	0	0	0	0	0	0		0	0	0	0	0	0	0	0		0	0	0	0	0	0	0	0			0.4	0	0	0	0	0	0	0	0
0.6	-1e-05	-9e-05	-0.0001	-5e-05	-7e-05	8e-05	-2e-05	-4e-05			0.6	0	0	0	0	0	0	0	0		0	0	0	0	0	0	0	0		0	0	0	0	0	0	0	0			0.6	0	0	0	0	0	0	0	0
0.8	-0.00016	-4e-05	5e-05	-5e-05	-0.00012	8e-05	-2e-05	6e-05			0.8	0	0	0	0	0	0	0	0		0	0	0	0	0	0	0	0		0	0	0	0	0	0	0	0			0.8	0	0	0	0	0	0	0	0
1	4e-05	1e-05	0.00015	-0.00015	-0.00017	0.00018	-7e-05	1e-05			1	0	0	0	0	0	0	0	0		0	0	0	0	0	0	0	0		0	0	0	0	0	0	0	0			1	0	0	0	0	0	0	0	0
1.2	-6e-05	0.00011	-0.0001	0.0002	0.00013	8e-05	-2e-05	-4e-05			1.2	0	0	0	0	0	0	0	0		0	0	0	0	0	0	0	0		0	0	0	0	0	0	0	0			1.2	0	0	0	0	0	0	0	0
1.4	0.00039	-9e-05	0.00015	0	0.00013	0.00033	-7e-05	-4e-05			1.4	0	0	0	0	0	0	0	0		0	0	0	0	0	0	0	0		0	0	0	0	0	0	0	0			1.4	0	0	0	0	0	0	0	0
1.6	-6e-05	1e-05	5e-05	-5e-05	8e-05	3e-05	-2e-05	-4e-05			1.6	0	0	0	0	0	0	0	0		0	0	0	0	0	0	0	0		0	0	0	0	0	0	0	0			1.6	0	0	0	0	0	0	0	0
1.8	-0.00016	1e-05	0.0001	-5e-05	-2e-05	-2e-05	3e-05	-4e-05			1.8	0	0	0	0	0	0	0	0		0	0	0	0	0	0	0	0		0	0	0	0	0	0	0	0			1.8	0	0	0	0	0	0	0	0
2	9e-05	0.00011	0	-0.00015	-2e-05	-7e-05	3e-05	1e-05			2	0	0	0	0	0	0	0	0		0	0	0	0	0	0	0	0		0	0	0	0	0	0	0	0			2	0	0	0	0	0	0	0	0
2.2	-1e-05	-0.00014	0	0.00015	8e-05	-0.00017	3e-05	6e-05			2.2	0	0	0	0	0	0	0	0		0	0	0	0	0	0	0	0		0	0	0	0	0	0	0	0			2.2	0	0	0	0	0	0	0	0
2.4	9e-05	1e-05	-0.00015	0	-2e-05	-7e-05	8e-05	6e-05			2.4	0	0	0	0	0	0	0	0		0	0	0	0	0	0	0	0		0	0	0	0	0	0	0	0			2.4	0	0	0	0	0	0	0	0
2.6	-6e-05	1e-05	5e-05	0	-7e-05	-0.00022	8e-05	0.00011			2.6	0	0	0	0	0	0	0	0		0	0	0	0	0	0	0	0		0	0	0	0	0	0	0	0			2.6	0	0	0	0	0	0	0	0
2.8	-0.00016	0.00011	-0.0001	-5e-05	-0.00012	-0.00012	0.00013	0.00011			2.8	0	0	0	0	0	0	0	0		0	0	0	0	0	0	0	0		0	0	0	0	0	0	0	0			2.8	0	0	0	0	0	0	0	0
3	4e-05	-9e-05	0	-0.00015	-0.00012	-0.00017	0.00013	0.00011			3	0	0	0	0	0	0	0	0		0	0	0	0	0	0	0	0		0	0	0	0	0	0	0	0			3	0	0	0	0	0	0	0	0
3.2	-1e-05	-4e-05	-0.0001	0.00015	0.00023	-7e-05	0.00028	0.00011			3.2	0	0	0	0	0	0	0	0		0	0	0	0	0	0	0	0		0	0	0	0	0	0	0	0			3.2	0	0	0	0	0	0	0	0
3.4	-0.00011	-4e-05	0.0001	0	0.00013	-0.00017	3e-05	0.00036			3.4	0	0	0	0	0	0	0	0		0	0	0	0	0	0	0	0		0	0	0	0	0	0	0	0			3.4	0	0	0	0	0	0	0	0
3.6	-6e-05	0.00011	0.0001	0	-2e-05	-7e-05	-0.00012	0.00011			3.6	0	0	0	0	0	0	0	0		0	0	0	0	0	0	0	0		0	0	0	0	0	0	0	0			3.6	0	0	0	0	0	0	0	0
3.8	-0.00011	-9e-05	0	-0.0001	-2e-05	-0.00017	-0.00012	1e-05			3.8	0	0	0	0	0	0	0	0		0	0	0	0	0	0	0	0		0	0	0	0	0	0	0	0			3.8	0	0	0	0	0	0	0	0
4	9e-05	6e-05	0.0003	-0.0002	-2e-05	-7e-05	-0.00022	-9e-05			4	0	0	0	0	0	0	0	0		0	0	0	0	0	0	0	0		0	0	0	0	0	0	0	0			4	0	0	0	0	0	0	0	0
4.2	-6e-05	1e-05	-5e-05	0.0001	3e-05	-0.00017	-0.00012	-0.00014			4.2	0	0	0	0	0	0	0	0		0	0	0	0	0	0	0	0		0	0	0	0	0	0	0	0			4.2	0	0	0	0	0	0	0	0
4.4	-0.00016	0.00011	0.00015	0	-2e-05	3e-05	-0.00012	-0.00014			4.4	0	0	0	0	0	0	0	0		0	0	0	0	0	0	0	0		0	0	0	0	0	0	0	0			4.4	0	0	0	0	0	0	0	0
4.6	-6e-05	-0.00014	-5e-05	-0.0001	-7e-05	-0.00012	-7e-05	-0.00014			4.6	0	0	0	0	0	0	0	0		0	0	0	0	0	0	0	0		0	0	0	0	0	0	0	0			4.6	0	0	0	0	0	0	0	0
4.8	-0.00011	1e-05	0.0001	-0.0001	-0.00017	3e-05	-0.00012	-0.00014			4.8	0	0	0	0	0	0	0	0		0	0	0	0	0	0	0	0		0	0	0	0	0	0	0	0			4.8	0	0	0	0	0	0	0	0
5	9e-05	1e-05	-0.0001	-0.0002	-7e-05	-7e-05	-0.00012	-0.00014			5	0	0	0	0	0	0	0	0		0	0	0	0	0	0	0	0		0	0	0	0	0	0	0	0			5	0	0	0	0	0	0	0	0
5.2	-1e-05	0.00016	5e-05	0.0001	0.00013	3e-05	-7e-05	-9e-05			5.2	0	0	0	0	0	0	0	0		0	0	0	0	0	0	0	0		0	0	0	0	0	0	0	0			5.2	0	0	0	0	0	0	0	0
5.4	-0.00021	-0.00014	-0.0001	-5e-05	0.00013	-7e-05	-2e-05	-9e-05			5.4	0	0	0	0	0	0	0	0		0	0	0	0	0	0	0	0		0	0	0	0	0	0	0	0			5.4	0	0	0	0	0	0	0	0
5.6	-1e-05	1e-05	0	0	3e-05	8e-05	-2e-05	-4e-05			5.6	0	0	0	0	0	0	0	0		0	0	0	0	0	0	0	0		0	0	0	0	0	0	0	0			5.6	0	0	0	0	0	0	0	0
5.8	-6e-05	1e-05	-0.00015	-0.0001	-2e-05	-2e-05	3e-05	-4e-05			5.8	0	0	0	0	0	0	0	0		0	0	0	0	0	0	0	0		0	0	0	0	0	0	0	0			5.8	0	0	0	0	0	0	0	0
6	9e-05	0.00011	5e-05	-0.00015	-2e-05	0.00028	-2e-05	1e-05			6	0	0	0	0	0	0	0	0		0	0	0	0	0	0	0	0		0	0	0	0	0	0	0	0			6	0	0	0	0	0	0	0	0
6.2	4e-05	-9e-05	5e-05	5e-05	3e-05	-7e-05	-7e-05	-4e-05			6.2	0	0	0	0	0	0	0	0		0	0	0	0	0	0	0	0		0	0	0	0	0	0	0	0			6.2	0	0	0	0	0	0	0	0
6.4	-0.00016	1e-05	0.0001	-5e-05	-7e-05	-2e-05	3e-05	-9e-05			6.4	0	0	0	0	0	0	0	0		0	0	0	0	0	0	0	0		0	0	0	0	0	0	0	0			6.4	0	0	0	0	0	0	0	0
6.6	4e-05	1e-05	0.00035	0	-7e-05	-7e-05	-7e-05	6e-05			6.6	0	0	0	0	0	0	0	0		0	0	0	0	0	0	0	0		0	0	0	0	0	0	0	0			6.6	0	0	0	0	0	0	0	0
6.8	-0.00011	0.00011	0	-0.0001	-0.00012	-0.00022	-7e-05	-4e-05			6.8	0	0	0	0	0	0	0	0		0	0	0	0	0	0	0	0		0	0	0	0	0	0	0	0			6.8	0	0	0	0	0	0	0	0
7	9e-05	-9e-05	0.00015	-5e-05	-2e-05	-0.00017	-7e-05	-4e-05			7	0	0	0	0	0	0	0	0		0	0	0	0	0	0	0	0		0	0	0	0	0	0	0	0			7	0	0	0	0	0	0	0	0
7.2	-6e-05	1e-05	0	5e-05	0.00013	-0.00022	-7e-05	1e-05			7.2	0	0	0	0	0	0	0	0		0	0	0	0	0	0	0	0		0	0	0	0	0	0	0	0			7.2	0	0	0	0	0	0	0	0
7.4	-0.00016	1e-05	5e-05	-5e-05	8e-05	-0.00012	-2e-05	-4e-05			7.4	0	0	0	0	0	0	0	0		0	0	0	0	0	0	0	0		0	0	0	0	0	0	0	0			7.4	0	0	0	0	0	0	0	0
7.6	-1e-05	0.00016	-0.0001	0	3e-05	-0.00022	-2e-05	1e-05			7.6	0	0	0	0	0	0	0	0		0	0	0	0	0	0	0	0		0	0	0	0	0	0	0	0			7.6	0	0	0	0	0	0	0	0
7.8	-0.00011	-9e-05	5e-05	-0.00015	-2e-05	-7e-05	-2e-05	1e-05			7.8	0	0	0	0	0	0	0	0		0	0	0	0	0	0	0	0		0	0	0	0	0	0	0	0			7.8	0	0	0	0	0	0	0	0
8	0.00029	1e-05	-0.00015	0.00015	3e-05	-0.00022	-2e-05	1e-05			8	0	0	0	0	0	0	0	0		0	0	0	0	0	0	0	0		0	0	0	0	0	0	0	0			8	0	0	0	0	0	0	0	0
8.2	-0.00011	1e-05	0	0.0001	-2e-05	-7e-05	3e-05	1e-05			8.2	0	0	0	0	0	0	0	0		0	0	0	0	0	0	0	0		0	0	0	0	0	0	0	0			8.2	0	0	0	0	0	0	0	0
8.4	-0.00016	0.00021	-0.0002	-5e-05	-2e-05	-0.00022	3e-05	6e-05			8.4	0	0	0	0	0	0	0	0		0	0	0	0	0	0	0	0		0	0	0	0	0	0	0	0			8.4	0	0	0	0	0	0	0	0
8.6	-1e-05	-0.00014	5e-05	-5e-05	-0.00012	3e-05	8e-05	0.00011			8.6	0	0	0	0	0	0	0	0		0	0	0	0	0	0	0	0		0	0	0	0	0	0	0	0			8.6	0	0	0	0	0	0	0	0
8.8	-6e-05	-4e-05	-5e-05	-0.00015	-0.00017	-0.00017	8e-05	6e-05			8.8	0	0	0	0	0	0	0	0		0	0	0	0	0	0	0	0		0	0	0	0	0	0	0	0			8.8	0	0	0	0	0	0	0	0
9	4e-05	1e-05	5e-05	0.00025	3e-05	-2e-05	0.00028	0.00011			9	0	0	0	0	0	0	0	0		0	0	0	0	0	0	0	0		0	0	0	0	0	0	0	0			9	0	0	0	0	0	0	0	0
9.2	-0.00011	0.00031	0.00035	5e-05	8e-05	-0.00012	3e-05	0.00016			9.2	0	0	0	0	0	0	0	0		0	0	0	0	0	0	0	0		0	0	0	0	0	0	0	0			9.2	0	0	0	0	0	0	0	0
9.4	-0.00016	-0.00014	-5e-05	-5e-05	3e-05	-2e-05	-7e-05	0.00016			9.4	0	0	0	0	0	0	0	0		0	0	0	0	0	0	0	0		0	0	0	0	0	0	0	0			9.4	0	0	0	0	0	0	0	0
9.6	4e-05	-0.00024	0.0001	-5e-05	-2e-05	-0.00012	-0.00017	6e-05			9.6	0	0	0	0	0	0	0	0		0	0	0	0	0	0	0	0		0	0	0	0	0	0	0	0			9.6	0	0	0	0	0	0	0	0
9.8	-1e-05	1e-05	-5e-05	-0.00015	-7e-05	8e-05	-0.00012	-0.00014			9.8	0	0	0	0	0	0	0	0		0	0	0	0	0	0	0	0		0	0	0	0	0	0	0	0			9.8	0	0	0	0	0	0	0	0
10	-0.00011	0.00041	0	0.0001	3e-05	-7e-05	-0.00017	-0.00019			10	0	0	0	0	0	0	0	0		0	0	0	0	0	0	0	0		0	0	0	0	0	0	0	0			10	0	0	0	0	0	0	0	0
10.2	-0.00011	-4e-05	-0.0001	-5e-05	-2e-05	0.00023	-0.00017	-0.00019			10.2	0	0	0	0	0	0	0	0		0	0	0	0	0	0	0	0		0	0	0	0	0	0	0	0			10.2	0	0	0	0	0	0	0	0
10.4	-0.00016	-0.00024	5e-05	-5e-05	-2e-05	-0.00012	-0.00017	-0.00014			10.4	0	0	0	0	0	0	0	0		0	0	0	0	0	0	0	0		0	0	0	0	0	0	0	0			10.4	0	0	0	0	0	0	0	0
10.6	4e-05	1e-05	-0.00015	-5e-05	-0.00012	-0.00012	-0.00012	-0.00019			10.6	0	0	0	0	0	0	0	0		0	0	0	0	0	0	0	0		0	0	0	0	0	0	0	0			10.6	0	0	0	0	0	0	0	0
10.8	-6e-05	0.00066	-5e-05	-0.0002	-0.00017	-0.00017	-0.00012	-0.00014			10.8	0	0	0	0	0	0	0	0		0	0	0	0	0	0	0	0		0	0	0	0	0	0	0	0			10.8	0	0	0	0	0	0	0	0
11	-0.00016	0.01081	-0.00015	0.0001	0.00013	-0.00027	-7e-05	-0.00014			11	0	0	0	0	0	0	0	0		0	0	0	0	0	0	0	0		0	0	0	0	0	0	0	0			11	0	0	0	0	0	0	0	0
11.2	0.00204	0.01051	5e-05	0	8e-05	-0.00012	-7e-05	-9e-05			11.2	0	0	0	0	0	0	0	0		0	0	0	0	0	0	0	0		0	0	0	0	0	0	0	0			11.2	0	0	0	0	0	0	0	0
11.4	0.00929	0.01211	0.00365	0	3e-05	-0.00032	-7e-05	-9e-05			11.4	0	0	0	0	0	0	0	0		0	0	0	0	0	0	0	0		0	0	0	0	0	0	0	0			11.4	0	0.0038	0	0	0	0	0	0
11.6	0.01154	0.01786	0.01275	-0.0001	3e-05	-0.00017	-2e-05	-4e-05			11.6	0	0.0338	0	0	0	0	0	0		0	0.034	0	0	0	0	0	0		0	0.0341	0	0	0	0	0	0			11.6	0	0.0322	0	0	0	0	0	0
11.8	0.01224	0.02656	0.01795	-0.0002	-0.00012	-0.00027	-2e-05	-4e-05			11.8	0.0366	0.0664	0	0	0	0	0	0		0.0365	0.0314	0	0	0	0	0	0		0.0367	0.0309	0	0	0	0	0	0			11.8	0.035	0.0706	0	0	0	0	0	0
12	0.01389	0.03236	0.0167	0.0028	-0.00012	-0.00017	-0.00017	-4e-05			12	0.0372	0.0732	0.0378	0.039	0	0	0	0		0.0358	0.0292	0.039	0	0	0	0	0		0.0358	0.0642	0.0359	0	0	0	0	0			12	0.0545	0.0708	0.0386	0	0	0	0	0
12.2	0.01684	0.03216	0.01835	0.00595	-7e-05	-0.00022	-2e-05	-0.00019			12.2	0.0516	0.0702	0.0278	0.0385	0	0	0	0		0.0331	0.0282	0.0385	0	0	0	0	0		0.0491	0.0696	0.0278	0	0	0	0	0			12.2	0.0531	0.0672	0.028	0	0	0	0	0
12.4	0.01794	0.03646	0.0221	0.00635	0.00508	0.00563	-7e-05	1e-05			12.4	0.0508	0.0706	0.0515	0.041	0	0	0	0		0.0326	0.023	0.041	0	0	0	0	0		0.05	0.0696	0.0348	0	0	0	0	0			12.4	0.0507	0.0689	0.0522	0	0	0	0	0
12.6	0.01994	0.03596	0.0244	0.0134	0.00718	0.01163	-7e-05	1e-05			12.6	0.0527	0.0713	0.0452	0.0416	0	0	0	0		0.0326	0.0214	0.0416	0.0272	0	0	0	0		0.0515	0.0688	0.0436	0.0169	0	0	0	0			12.6	0.052	0.0741	0.0475	0.0151	0	0	0	0
12.8	0.02579	0.04336	0.0287	0.01565	0.00888	0.01123	-7e-05	-4e-05			12.8	0.0619	0.0748	0.0374	0.0426	0	0.0146	0	0		0.0338	0	0.0426	0.0288	0	0.0305	0	0		0.0585	0.0711	0.0298	0.0217	0	0.0157	0	0			12.8	0.0612	0.0781	0.0432	0.0192	0	0.0137	0	0
13	0.03714	0.05026	0.03785	0.01655	0.00933	0.02568	0.00263	-4e-05			13	0.06	0.0776	0.0652	0.0427	0.0118	0.0098	0	0		0.0332	0.0214	0.0427	0.03	0.0263	0.0348	0	0		0.0591	0.0727	0.0367	0.0176	0.0181	0.012	0	0			13	0.0603	0.0792	0.0753	0.0175	0.0151	0.0102	0	0
13.2	0.04459	0.05761	0.0466	0.01715	0.00873	0.03688	0.00498	-4e-05			13.2	0.059	0.0778	0.0734	0.044	0.0111	0.0253	0	0		0.0344	0.026	0.044	0.0308	0.0282	0.0395	0.0229	0		0.0576	0.0741	0.0596	0.0268	0.0124	0.025	0	0			13.2	0.0587	0.0777	0.0724	0.0403	0.0107	0.0268	0	0
13.4	0.04989	0.06971	0.0498	0.02405	0.01243	0.03593	0.00293	-4e-05			13.4	0.0644	0.0787	0.0669	0.0433	0.0103	0.0255	0.0078	0		0.044	0.0264	0.0433	0.0323	0.0309	0.0417	0.0254	0		0.0635	0.0751	0.0606	0.0317	0.0117	0.0253	0.0086	0			13.4	0.0645	0.08	0.0693	0.0311	0.0112	0.0278	0.0078	0
13.6	0.06959	0.07761	0.0514	0.02615	0.01448	0.03508	0.00383	0.00116			13.6	0.0649	0.0824	0.0692	0.043	0.0118	0.0308	0.0055	0		0.049	0.0285	0.043	0.0321	0.0345	0.0438	0.0258	0		0.0643	0.078	0.0567	0.0264	0.0147	0.0287	0.0094	0			13.6	0.064	0.0832	0.0679	0.0248	0.0116	0.0345	0.0049	0
13.8	0.07604	0.09786	0.0611	0.0335	0.01423	0.03808	0.00793	0.00371			13.8	0.0692	0.0842	0.0676	0.0463	0.0116	0.0294	0.0085	0		0.0497	0.0266	0.0463	0.0318	0.0349	0.0435	0.0273	0.0196		0.0681	0.08	0.0601	0.0257	0.0164	0.0294	0.011	0			13.8	0.0713	0.0853	0.0666	0.0328	0.0114	0.0328	0.0071	0
14	0.07349	0.09986	0.0654	0.03585	0.01748	0.04083	0.01478	0.00296			14	0.0697	0.0861	0.0709	0.0477	0.032	0.0276	0.0207	0		0.0506	0.0293	0.0477	0.0337	0.0446	0.0437	0.0267	0.0213		0.0682	0.0837	0.0604	0.0283	0.0238	0.029	0.0127	0			14	0.0711	0.0859	0.0708	0.0313	0.0309	0.0315	0.0199	0
14.2	0.07234	0.09626	0.0739	0.0494	0.01353	0.03683	0.01713	0.00521			14.2	0.0694	0.0865	0.0758	0.0478	0.0325	0.0294	0.0196	0		0.0498	0.0289	0.0478	0.0352	0.0409	0.0491	0.0285	0.0227		0.0676	0.0854	0.0694	0.0302	0.0312	0.0305	0.0201	0			14.2	0.0715	0.0859	0.0744	0.0395	0.0318	0.0332	0.02	0
14.4	0.07174	0.07411	0.0755	0.05075	0.01613	0.03723	0.01978	0.01086			14.4	0.0706	0.0866	0.0727	0.0483	0.0312	0.0343	0.0246	0.0221		0.0505	0.0295	0.0483	0.0353	0.0412	0.0467	0.0366	0.0293		0.0672	0.0849	0.0708	0.0334	0.032	0.0332	0.0233	0.0229			14.4	0.072	0.0853	0.0746	0.0426	0.0297	0.0368	0.03	0.0129
14.6	0.06834	0.06826	0.077	0.0545	0.02118	0.03538	0.02338	0.01176			14.6	0.07	0.0861	0.0737	0.0487	0.0298	0.0335	0.0258	0.019		0.0505	0.0288	0.0487	0.0365	0.0405	0.0485	0.0354	0.0286		0.0684	0.0819	0.0697	0.0391	0.0306	0.0361	0.0255	0.017			14.6	0.0708	0.0853	0.0746	0.0447	0.0307	0.0344	0.025	0.0197
14.8	0.06979	0.06686	0.071	0.05585	0.02933	0.04408	0.01983	0.00971			14.8	0.0692	0.0844	0.0748	0.0493	0.0306	0.0343	0.0209	0.0128		0.0505	0.0284	0.0493	0.0369	0.041	0.0512	0.0373	0.0312		0.0683	0.082	0.0686	0.0368	0.0312	0.0372	0.0221	0.0134			14.8	0.0704	0.0852	0.0745	0.0516	0.0303	0.0363	0.0271	0.0146
15	0.06729	0.05431	0.0706	0.05295	0.02458	0.04708	0.02123	0.00966			15	0.0693	0.0852	0.074	0.0486	0.031	0.0354	0.0281	0.0139		0.0506	0.0307	0.0486	0.0377	0.0412	0.0518	0.0402	0.0315		0.0677	0.0833	0.0685	0.0385	0.0319	0.0383	0.0262	0.0127			15	0.071	0.0865	0.0756	0.0462	0.0313	0.0363	0.0301	0.0137
15.2	0.05639	0.06126	0.0714	0.05065	0.02568	0.04873	0.02823	0.01201			15.2	0.07	0.0859	0.0723	0.0493	0.0326	0.0364	0.0275	0.0141		0.0509	0.0334	0.0493	0.0375	0.0415	0.0516	0.0438	0.0342		0.0688	0.0831	0.0696	0.0411	0.0329	0.0389	0.0269	0.0135			15.2	0.0707	0.087	0.0752	0.0437	0.032	0.039	0.0318	0.0161
15.4	0.05179	0.05901	0.07695	0.0519	0.02878	0.04558	0.02578	0.01696			15.4	0.0726	0.0871	0.0713	0.0494	0.0335	0.0369	0.0293	0.018		0.0523	0.0371	0.0494	0.0381	0.0416	0.051	0.0437	0.0351		0.0711	0.0841	0.071	0.0426	0.0337	0.0397	0.0284	0.0168			15.4	0.0727	0.0885	0.073	0.0463	0.0337	0.0398	0.0313	0.0197
15.6	0.04294	0.05846	0.07595	0.06815	0.03343	0.04438	0.02938	0.01666			15.6	0.0721	0.0883	0.0718	0.0499	0.0341	0.0371	0.0301	0.0221		0.0524	0.0415	0.0499	0.0397	0.0422	0.0528	0.0437	0.037		0.0707	0.0858	0.0718	0.0448	0.0367	0.0419	0.0298	0.0211			15.6	0.0735	0.0897	0.0721	0.046	0.0344	0.04	0.0317	0.0223
15.8	0.05719	0.06526	0.0763	0.06585	0.03823	0.04713	0.02868	0.01861			15.8	0.0741	0.0892	0.0724	0.0517	0.0339	0.0386	0.0308	0.0184		0.0536	0.0474	0.0517	0.0398	0.0434	0.0519	0.0453	0.0378		0.0711	0.0864	0.0717	0.0473	0.0387	0.0444	0.0329	0.0197			15.8	0.0754	0.0889	0.0726	0.0473	0.0345	0.043	0.0341	0.0177
16	0.05904	0.06071	0.0817	0.0582	0.03218	0.05343	0.03658	0.01636			16	0.0732	0.0899	0.074	0.0513	0.0343	0.0412	0.0344	0.0179		0.0527	0.0523	0.0513	0.0419	0.0433	0.0529	0.0462	0.0386		0.0716	0.0875	0.0717	0.05	0.041	0.0464	0.0372	0.0187			16	0.0742	0.09	0.0754	0.0509	0.0349	0.0455	0.0375	0.0168
16.2	0.06914	0.06146	0.0814	0.06375	0.02833	0.05068	0.03503	0.02056			16.2	0.0737	0.0894	0.0751	0.0539	0.0349	0.0446	0.0368	0.0193		0.0528	0.056	0.0539	0.0442	0.0438	0.0545	0.047	0.0399		0.0719	0.0861	0.072	0.0513	0.0433	0.0486	0.0388	0.0204			16.2	0.0744	0.0909	0.0774	0.0525	0.0342	0.0484	0.0387	0.018
16.4	0.06989	0.07661	0.0782	0.05895	0.03993	0.05153	0.03643	0.01381			16.4	0.0735	0.0908	0.0762	0.0544	0.0366	0.0459	0.0383	0.0211		0.0529	0.059	0.0544	0.0468	0.0444	0.0543	0.0482	0.0393		0.0713	0.0882	0.0716	0.0515	0.0453	0.05	0.0409	0.0207			16.4	0.0747	0.0903	0.079	0.0523	0.0372	0.0495	0.0415	0.0208
16.6	0.07379	0.06681	0.082	0.0592	0.04083	0.05138	0.03693	0.01701			16.6	0.0739	0.0914	0.0759	0.0559	0.0394	0.0466	0.0392	0.0214		0.0536	0.0593	0.0559	0.048	0.0442	0.0551	0.0473	0.0402		0.0713	0.0876	0.0718	0.0513	0.046	0.0505	0.0426	0.0211			16.6	0.076	0.0922	0.0783	0.0529	0.0412	0.0502	0.0425	0.0213
16.8	0.07604	0.08126	0.07955	0.06915	0.04373	0.05268	0.03763	0.02261			16.8	0.077	0.0911	0.0753	0.0564	0.0421	0.0469	0.0409	0.0206		0.0549	0.0584	0.0564	0.0481	0.0446	0.0551	0.0478	0.0411		0.0747	0.0869	0.0732	0.0516	0.0465	0.0511	0.0437	0.0216			16.8	0.0767	0.0918	0.0775	0.0559	0.0438	0.0499	0.0447	0.0215
17	0.07794	0.07866	0.0755	0.06865	0.04203	0.05548	0.04463	0.02211			17	0.0765	0.0922	0.076	0.0566	0.0437	0.0478	0.0415	0.0217		0.0541	0.0605	0.0566	0.0492	0.0452	0.0558	0.0481	0.0413		0.0738	0.0888	0.0733	0.0535	0.0468	0.0517	0.045	0.0234			17	0.0774	0.0913	0.0765	0.0575	0.0461	0.0499	0.0434	0.0215
17.2	0.07469	0.07716	0.08105	0.06565	0.03713	0.05258	0.04333	0.01911			17.2	0.0768	0.0931	0.0754	0.0579	0.0446	0.0504	0.043	0.0211		0.0535	0.0594	0.0579	0.0497	0.0463	0.0559	0.0488	0.0422		0.0735	0.0879	0.0735	0.0564	0.0481	0.0536	0.0459	0.0249			17.2	0.0778	0.0922	0.0767	0.0575	0.0457	0.0525	0.0438	0.0211
17.4	0.07719	0.07941	0.082	0.06695	0.04623	0.05003	0.04313	0.01546			17.4	0.0777	0.0919	0.077	0.0584	0.0435	0.0519	0.0443	0.0214		0.0544	0.0573	0.0584	0.0503	0.0468	0.0559	0.0496	0.0427		0.0752	0.0867	0.0742	0.057	0.0495	0.0549	0.0477	0.0245			17.4	0.0775	0.0923	0.0774	0.0593	0.0447	0.0538	0.0457	0.0214
17.6	0.07644	0.08206	0.08045	0.06735	0.04683	0.05058	0.04453	0.02236			17.6	0.0754	0.0901	0.0786	0.0586	0.0434	0.0515	0.0439	0.0216		0.0528	0.0577	0.0586	0.0511	0.0468	0.0569	0.049	0.0436		0.0736	0.0861	0.0746	0.0581	0.0505	0.0561	0.0481	0.0251			17.6	0.0767	0.0917	0.0793	0.0578	0.0444	0.0532	0.0468	0.0204
17.8	0.07539	0.08211	0.07425	0.06775	0.04773	0.05263	0.04663	0.02091			17.8	0.0745	0.0914	0.0771	0.0575	0.0442	0.0502	0.0452	0.0218		0.0517	0.0599	0.0575	0.0504	0.0469	0.0564	0.0501	0.0439		0.0729	0.0871	0.0744	0.0583	0.0512	0.0565	0.0491	0.0257			17.8	0.0772	0.0911	0.0795	0.0554	0.0447	0.0519	0.0474	0.0214
18	0.07459	0.07896	0.0725	0.0722	0.04173	0.05813	0.04513	0.01526			18	0.076	0.0909	0.0763	0.0575	0.0455	0.0477	0.0451	0.0235		0.0527	0.0584	0.0575	0.0489	0.0464	0.0559	0.0495	0.0431		0.0736	0.0859	0.0745	0.0577	0.051	0.0558	0.0496	0.0255			18	0.0762	0.0904	0.0789	0.0548	0.0464	0.05	0.0467	0.0254
18.2	0.07589	0.07516	0.0737	0.06995	0.04483	0.06038	0.04253	0.01886			18.2	0.0771	0.0885	0.0766	0.0569	0.0482	0.0464	0.0436	0.0242		0.0534	0.0584	0.0569	0.0479	0.0454	0.0545	0.0488	0.0435		0.0744	0.0852	0.0746	0.0578	0.0513	0.0553	0.049	0.0258			18.2	0.077	0.0895	0.0782	0.055	0.05	0.0488	0.0457	0.0229
18.4	0.07639	0.07616	0.07315	0.06665	0.04868	0.05143	0.04403	0.01781			18.4	0.0765	0.0876	0.0754	0.0558	0.0498	0.0472	0.0442	0.0233		0.0523	0.0567	0.0558	0.0488	0.0455	0.0548	0.0479	0.0431		0.0733	0.0849	0.0739	0.0585	0.0515	0.0553	0.049	0.0264			18.4	0.0766	0.0891	0.0767	0.0574	0.0518	0.0492	0.0464	0.0219
18.6	0.07719	0.07821	0.0766	0.0661	0.04678	0.05363	0.05088	0.01821			18.6	0.0749	0.0876	0.0746	0.0559	0.0496	0.0489	0.0456	0.0219		0.0524	0.0573	0.0559	0.0487	0.0459	0.0538	0.0488	0.0433		0.0732	0.0848	0.073	0.0595	0.0516	0.0559	0.0497	0.0268			18.6	0.0765	0.0887	0.076	0.0611	0.0505	0.0505	0.0472	0.0223
18.8	0.07559	0.07751	0.07355	0.0696	0.04058	0.05628	0.04728	0.02026			18.8	0.0747	0.0872	0.075	0.0558	0.0482	0.0507	0.046	0.0224		0.051	0.0558	0.0558	0.0484	0.0454	0.0544	0.049	0.0429		0.0729	0.0839	0.0731	0.0594	0.052	0.0563	0.0501	0.0268			18.8	0.0753	0.0883	0.0759	0.0622	0.0476	0.0529	0.048	0.0224
19	0.07604	0.07886	0.075	0.066	0.04123	0.05663	0.04368	0.01861			19	0.0735	0.0877	0.0751	0.0566	0.0468	0.051	0.0461	0.0241		0.0512	0.055	0.0566	0.0479	0.0447	0.0541	0.0483	0.0432		0.0726	0.0836	0.0736	0.0592	0.052	0.0565	0.0501	0.0273			19	0.0746	0.0876	0.0763	0.0609	0.0456	0.0535	0.0484	0.0236
19.2	0.07449	0.07701	0.07315	0.0656	0.04068	0.05543	0.04853	0.01326			19.2	0.0718	0.0864	0.075	0.0554	0.0455	0.0504	0.0466	0.0228		0.0505	0.0546	0.0554	0.0478	0.0444	0.0538	0.0479	0.0426		0.0704	0.0826	0.0735	0.0586	0.0518	0.0562	0.0504	0.0271			19.2	0.0742	0.0864	0.0762	0.0591	0.0447	0.0529	0.0478	0.0215
19.4	0.07524	0.08196	0.06975	0.06485	0.04548	0.04843	0.04173	0.01371			19.4	0.0726	0.0849	0.0745	0.0542	0.045	0.0493	0.0462	0.0207		0.0496	0.053	0.0542	0.0475	0.0438	0.0538	0.0478	0.0428		0.0697	0.0818	0.0727	0.0586	0.0516	0.0559	0.05	0.0267			19.4	0.0726	0.0849	0.076	0.057	0.0451	0.0504	0.0475	0.021
19.6	0.07454	0.08271	0.0712	0.07045	0.04978	0.04818	0.04498	0.01971			19.6	0.0722	0.0835	0.073	0.0539	0.0455	0.0484	0.0456	0.0219		0.0492	0.0526	0.0539	0.0465	0.0436	0.053	0.0478	0.042		0.0701	0.0807	0.0711	0.0582	0.0518	0.0556	0.0496	0.0265			19.6	0.0721	0.0841	0.0751	0.0554	0.0466	0.0482	0.0468	0.0222
19.8	0.07154	0.07421	0.07345	0.0698	0.04628	0.05408	0.04433	0.02181			19.8	0.0718	0.0825	0.0714	0.0531	0.0469	0.0481	0.0453	0.0241		0.0487	0.0524	0.0531	0.0459	0.0433	0.0522	0.0468	0.0416		0.0686	0.0793	0.0698	0.0585	0.0515	0.0551	0.0492	0.0268			19.8	0.0725	0.0825	0.0737	0.0552	0.0487	0.0473	0.0465	0.0234
20	0.07534	0.07441	0.0734	0.0655	0.04163	0.05608	0.04308	0.01561			20	0.0711	0.0813	0.0712	0.0525	0.0483	0.0487	0.045	0.0249		0.0483	0.051	0.0525	0.0459	0.0431	0.0513	0.0463	0.0417		0.068	0.0783	0.0696	0.0582	0.0507	0.0547	0.0492	0.0264			20	0.072	0.0808	0.073	0.0563	0.0491	0.0478	0.0455	0.0248
20.2	0.07239	0.07361	0.0747	0.0646	0.04013	0.05683	0.04483	0.01146			20.2	0.0704	0.0807	0.0721	0.0522	0.0484	0.0501	0.0451	0.0229		0.0477	0.0496	0.0522	0.0458	0.042	0.0511	0.0462	0.0416		0.0684	0.0784	0.0695	0.0577	0.05	0.0547	0.0489	0.0258			20.2	0.0712	0.0805	0.0724	0.057	0.0473	0.0503	0.0447	0.021
20.4	0.07379	0.06721	0.0711	0.05895	0.04153	0.05318	0.04933	0.01681			20.4	0.0698	0.0802	0.0722	0.0515	0.0476	0.0515	0.0451	0.021		0.047	0.0497	0.0515	0.0449	0.0414	0.0508	0.0456	0.0406		0.0678	0.0775	0.069	0.0573	0.0497	0.0548	0.0488	0.0256			20.4	0.0707	0.0798	0.0722	0.0574	0.0451	0.0525	0.0444	0.0194
20.6	0.07119	0.07326	0.06915	0.0593	0.04378	0.05418	0.05028	0.02081			20.6	0.0686	0.0791	0.0714	0.0511	0.0468	0.0516	0.046	0.0215		0.0462	0.0497	0.0511	0.0444	0.0412	0.0503	0.0447	0.0399		0.067	0.0771	0.0686	0.0572	0.0498	0.0545	0.0487	0.0257			20.6	0.0704	0.0789	0.0724	0.0567	0.0444	0.0525	0.0453	0.0207
20.8	0.06954	0.06861	0.067	0.06415	0.04213	0.04708	0.04323	0.02661			20.8	0.0686	0.079	0.0712	0.0509	0.0464	0.0507	0.047	0.022		0.0462	0.0496	0.0509	0.0437	0.0409	0.0495	0.0444	0.0396		0.0662	0.076	0.0685	0.0573	0.0495	0.0538	0.0485	0.026			20.8	0.0693	0.0789	0.0721	0.056	0.0453	0.0511	0.0461	0.0224
21	0.07104	0.06891	0.0694	0.0638	0.03858	0.04653	0.04183	0.01881			21	0.0683	0.0788	0.0704	0.0504	0.0465	0.049	0.0466	0.0225		0.046	0.0489	0.0504	0.0434	0.0402	0.0494	0.0438	0.0395		0.0662	0.0758	0.0682	0.0571	0.0491	0.0535	0.0479	0.0258			21	0.0686	0.0787	0.0716	0.0559	0.0465	0.0493	0.0463	0.0245
21.2	0.06999	0.07491	0.0691	0.0642	0.03958	0.05513	0.03598	0.01566			21.2	0.0684	0.0778	0.0694	0.0501	0.0469	0.0479	0.0459	0.0227		0.0457	0.048	0.0501	0.0433	0.0395	0.0488	0.0435	0.0393		0.0663	0.0749	0.0677	0.0569	0.0488	0.0533	0.0474	0.0256			21.2	0.0682	0.079	0.0712	0.0558	0.0467	0.0488	0.0458	0.0212
21.4	0.07214	0.07586	0.07055	0.06075	0.03943	0.05383	0.04308	0.01196			21.4	0.0684	0.0774	0.0689	0.0498	0.0467	0.0479	0.0453	0.0205		0.0452	0.0476	0.0498	0.0428	0.0393	0.0487	0.0431	0.0385		0.066	0.0743	0.0673	0.0566	0.0487	0.0533	0.0472	0.0255			21.4	0.0685	0.0785	0.0701	0.056	0.0461	0.049	0.0455	0.0191
21.6	0.06904	0.07771	0.06605	0.06015	0.04333	0.05838	0.04688	0.02446			21.6	0.0677	0.0776	0.0686	0.0492	0.0459	0.0485	0.0449	0.0208		0.0445	0.0476	0.0492	0.0424	0.0389	0.048	0.0427	0.0381		0.0651	0.0736	0.0669	0.0564	0.0482	0.0533	0.0471	0.0254			21.6	0.0686	0.0777	0.0692	0.0565	0.0449	0.0498	0.0464	0.0208
21.8	0.07029	0.07616	0.06255	0.0651	0.04113	0.06003	0.03923	0.02151			21.8	0.0671	0.0764	0.0688	0.0487	0.0449	0.0489	0.0449	0.0209		0.0439	0.0473	0.0487	0.0419	0.0388	0.0475	0.0423	0.0378		0.0651	0.0733	0.0668	0.0562	0.0479	0.0534	0.0471	0.0252			21.8	0.0679	0.0778	0.0692	0.056	0.0436	0.0501	0.0469	0.0207
22	0.07089	0.07106	0.06435	0.0636	0.04313	0.05838	0.04068	0.01936			22	0.0663	0.0757	0.069	0.0484	0.0444	0.0487	0.0444	0.0209		0.044	0.0466	0.0484	0.0414	0.0383	0.047	0.0419	0.0376		0.0643	0.0736	0.0664	0.056	0.0477	0.0531	0.047	0.0251			22	0.0668	0.078	0.0685	0.0546	0.0436	0.0498	0.0456	0.0218
22.2	0.06834	0.07046	0.066	0.0598	0.04088	0.05353	0.04358	0.01711			22.2	0.0652	0.0759	0.0681	0.0483	0.0447	0.0487	0.0433	0.0229		0.0438	0.0462	0.0483	0.0408	0.038	0.0466	0.0414	0.0374		0.0638	0.0729	0.066	0.0554	0.0476	0.0528	0.0468	0.0251			22.2	0.0665	0.0773	0.0683	0.0532	0.0444	0.0488	0.044	0.0231
22.4	0.06949	0.06626	0.0657	0.05925	0.04278	0.05308	0.04333	0.01441			22.4	0.0653	0.0759	0.0672	0.0474	0.0454	0.0485	0.043	0.0217		0.0435	0.046	0.0474	0.0406	0.0374	0.0463	0.041	0.037		0.0641	0.0722	0.0653	0.055	0.0474	0.0525	0.0467	0.0253			22.4	0.066	0.0764	0.0678	0.0526	0.0452	0.0479	0.0432	0.0209
22.6	0.07089	0.06746	0.06935	0.05665	0.03878	0.05078	0.04423	0.02361			22.6	0.0656	0.0752	0.0667	0.0475	0.0456	0.0477	0.0427	0.0204		0.0429	0.0451	0.0475	0.0407	0.037	0.0462	0.0408	0.0363		0.0636	0.0719	0.0646	0.0548	0.0472	0.0521	0.0466	0.0251			22.6	0.0658	0.0755	0.0664	0.053	0.0455	0.0469	0.0434	0.0204
22.8	0.06644	0.07401	0.0648	0.0571	0.04023	0.05058	0.04053	0.01746			22.8	0.0656	0.0745	0.0663	0.0474	0.0453	0.0471	0.043	0.0209		0.0432	0.045	0.0474	0.04	0.037	0.0455	0.0405	0.0358		0.0631	0.0716	0.0641	0.0547	0.0468	0.0519	0.0464	0.0252			22.8	0.0655	0.0746	0.0657	0.0536	0.0446	0.0464	0.0439	0.0212
23	0.06524	0.07656	0.0654	0.05625	0.03798	0.05318	0.04303	0.01061			23	0.0652	0.074	0.0658	0.0465	0.0442	0.047	0.0438	0.0213		0.043	0.0448	0.0465	0.0396	0.037	0.0453	0.04	0.0357		0.0628	0.0713	0.0639	0.0544	0.0465	0.0517	0.0463	0.0252			23	0.0648	0.0743	0.0654	0.0538	0.0431	0.0471	0.0438	0.0215
23.2	0.06684	0.06801	0.0666	0.05545	0.03818	0.05503	0.04333	0.01031			23.2	0.0648	0.0737	0.0651	0.0466	0.0429	0.0476	0.044	0.0216		0.0429	0.0448	0.0466	0.0397	0.0364	0.045	0.0399	0.0358		0.0621	0.0712	0.0637	0.0541	0.0462	0.0514	0.0461	0.0253			23.2	0.0645	0.0742	0.0653	0.0543	0.0415	0.0486	0.0435	0.0221
23.4	0.06749	0.06561	0.0653	0.05875	0.03633	0.05293	0.04268	0.02256			23.4	0.064	0.0737	0.0648	0.0466	0.0421	0.0481	0.0437	0.0209		0.0423	0.0446	0.0466	0.0394	0.0364	0.0446	0.0397	0.0356		0.062	0.0707	0.0634	0.0538	0.046	0.0513	0.046	0.0251			23.4	0.0639	0.0736	0.0652	0.0552	0.0408	0.05	0.0433	0.0203
23.6	0.06504	0.07021	0.06115	0.0582	0.03853	0.05563	0.04208	0.02041			23.6	0.0633	0.0738	0.0643	0.0464	0.0423	0.0481	0.0436	0.0196		0.0421	0.0443	0.0464	0.0392	0.0361	0.0447	0.0394	0.0354		0.0615	0.0706	0.0631	0.0537	0.0457	0.051	0.0457	0.025			23.6	0.0637	0.0732	0.0651	0.0548	0.0409	0.0499	0.0433	0.0186
23.8	0.06874	0.07411	0.06305	0.0586	0.04158	0.05278	0.04243	0.01661			23.8	0.0626	0.0729	0.0638	0.0463	0.0429	0.0477	0.0435	0.0197		0.0419	0.044	0.0463	0.039	0.0358	0.0443	0.0393	0.035		0.0606	0.0697	0.0627	0.0535	0.0453	0.0509	0.0453	0.0249			23.8	0.0631	0.0729	0.0643	0.0539	0.0419	0.0488	0.0434	0.0206
24	0.06689	0.06471	0.06545	0.05555	0.04188	0.05123	0.03843	0.00986			24	0.0624	0.0721	0.0635	0.0459	0.0438	0.0475	0.0435	0.0216		0.0419	0.0443	0.0459	0.0386	0.0357	0.0442	0.0388	0.0346		0.0609	0.0696	0.0625	0.0534	0.0451	0.0509	0.0448	0.0249			24	0.0625	0.0726	0.0633	0.0527	0.043	0.0475	0.0435	0.0226
24.2	0.06409	0.06531	0.06645	0.0547	0.03703	0.04948	0.04063	0.01856			24.2	0.062	0.0715	0.0632	0.0454	0.0444	0.0475	0.0433	0.0226		0.0415	0.0438	0.0454	0.0385	0.0356	0.0442	0.0388	0.0346		0.06	0.0689	0.0619	0.0535	0.0449	0.051	0.0445	0.0249			24.2	0.0621	0.072	0.0629	0.0515	0.0438	0.0464	0.0433	0.0233
24.4	0.06729	0.06831	0.06305	0.06185	0.03923	0.04773	0.04248	0.02091			24.4	0.0616	0.0712	0.0628	0.0454	0.0446	0.0475	0.0434	0.0223		0.0414	0.0434	0.0454	0.0385	0.0353	0.0437	0.0386	0.0342		0.0596	0.0685	0.0614	0.0535	0.0447	0.0512	0.0446	0.0248			24.4	0.0619	0.0708	0.0624	0.0504	0.0439	0.0462	0.0435	0.022
24.6	0.06259	0.06556	0.06345	0.05655	0.03968	0.04873	0.04198	0.01986			24.6	0.0612	0.0705	0.0624	0.0452	0.0444	0.0472	0.0438	0.0211		0.0412	0.0433	0.0452	0.0381	0.0352	0.0435	0.0384	0.0343		0.0595	0.0682	0.0607	0.0532	0.0446	0.0513	0.0448	0.0246			24.6	0.0616	0.0704	0.0619	0.0505	0.0431	0.0468	0.044	0.0201
24.8	0.06304	0.06886	0.064	0.0549	0.04048	0.05008	0.03963	0.01441			24.8	0.0611	0.0697	0.0619	0.0451	0.0437	0.0469	0.0441	0.0209		0.041	0.0435	0.0451	0.0377	0.0348	0.0433	0.038	0.0339		0.0592	0.0678	0.0606	0.0528	0.0445	0.051	0.0451	0.0248			24.8	0.0611	0.0703	0.0615	0.0507	0.042	0.0471	0.044	0.0205
25	0.06314	0.06851	0.06165	0.05555	0.04273	0.04753	0.03973	0.01156			25	0.0607	0.0695	0.0615	0.0448	0.0429	0.0466	0.0442	0.0215		0.0408	0.0432	0.0448	0.0374	0.0346	0.0428	0.0377	0.0338		0.059	0.0679	0.0606	0.0523	0.0443	0.0507	0.0453	0.0248			25	0.0602	0.0697	0.0609	0.0509	0.041	0.047	0.0436	0.0208
25.2	0.06334	0.06691	0.06295	0.0543	0.04158	0.04593	0.04303	0.01546			25.2	0.0601	0.0694	0.0608	0.0447	0.042	0.0465	0.0438	0.0215		0.0411	0.0435	0.0447	0.0374	0.0344	0.0427	0.0376	0.0335		0.0587	0.0677	0.0605	0.0517	0.0442	0.0501	0.0453	0.025			25.2	0.0601	0.0695	0.0601	0.0511	0.0404	0.0466	0.043	0.0209
25.4	0.06584	0.06811	0.0639	0.0556	0.03848	0.04703	0.03958	0.01661			25.4	0.06	0.0691	0.0601	0.0445	0.0414	0.0464	0.0431	0.0218		0.0409	0.0433	0.0445	0.0371	0.0341	0.0426	0.0372	0.0332		0.0588	0.0672	0.0603	0.0513	0.0441	0.0498	0.045	0.025			25.4	0.0596	0.0701	0.0594	0.0511	0.0401	0.0462	0.0422	0.022
25.6	0.06379	0.06956	0.06485	0.0544	0.03748	0.04748	0.03928	0.01271			25.6	0.0596	0.0691	0.0597	0.0447	0.0411	0.0464	0.0427	0.0214		0.0405	0.0426	0.0447	0.0371	0.0341	0.0427	0.0373	0.033		0.0588	0.0667	0.0599	0.0512	0.0438	0.0497	0.0448	0.0249			25.6	0.0596	0.07	0.0589	0.051	0.0404	0.046	0.0414	0.0202
25.8	0.06579	0.07061	0.06335	0.0578	0.03753	0.05143	0.04078	0.00901			25.8	0.0597	0.0691	0.0596	0.0446	0.0411	0.0464	0.0426	0.0208		0.0406	0.0427	0.0446	0.037	0.0341	0.0425	0.0372	0.0328		0.0586	0.0663	0.0594	0.0512	0.0435	0.0499	0.0446	0.0248			25.8	0.0595	0.0687	0.0591	0.0508	0.0409	0.0462	0.0418	0.0197
26	0.06299	0.07181	0.05995	0.05645	0.03908	0.04698	0.03908	0.01261			26	0.0591	0.0683	0.0599	0.044	0.0414	0.0467	0.0424	0.0212		0.0402	0.0425	0.044	0.0371	0.034	0.0426	0.0371	0.0329		0.058	0.066	0.059	0.0513	0.0432	0.0501	0.0445	0.0248			26	0.0598	0.0678	0.0596	0.0505	0.0415	0.0462	0.0424	0.0209
26.2	0.06134	0.06631	0.0583	0.0556	0.04018	0.05188	0.04173	0.02541			26.2	0.0592	0.0673	0.0599	0.044	0.0419	0.0471	0.0421	0.022		0.04	0.0423	0.044	0.0369	0.0339	0.0425	0.0371	0.0329		0.0579	0.0653	0.0588	0.051	0.0431	0.0501	0.0443	0.0247			26.2	0.0591	0.0675	0.0598	0.0503	0.0418	0.0464	0.0426	0.0213
26.4	0.06489	0.06786	0.0603	0.0546	0.03793	0.05023	0.04013	0.02116			26.4	0.0589	0.0667	0.0594	0.0438	0.0423	0.0471	0.0422	0.0222		0.0401	0.0419	0.0438	0.0364	0.0339	0.042	0.0369	0.0327		0.0577	0.0649	0.0586	0.0509	0.043	0.0498	0.0441	0.0245			26.4	0.0591	0.067	0.0594	0.0498	0.0417	0.0462	0.0428	0.0217
26.6	0.06294	0.06696	0.06205	0.0532	0.03788	0.04638	0.04148	0.01801			26.6	0.0589	0.0667	0.0587	0.0435	0.0427	0.0466	0.0425	0.0214		0.0398	0.0414	0.0435	0.0362	0.0335	0.0418	0.0365	0.0326		0.0576	0.0646	0.0584	0.0507	0.0431	0.0494	0.0439	0.0245			26.6	0.0591	0.0666	0.0587	0.049	0.0409	0.0455	0.0426	0.0211
26.8	0.06299	0.06601	0.064	0.055	0.03958	0.04783	0.03673	0.01386			26.8	0.0589	0.0665	0.0582	0.0432	0.0422	0.0457	0.0428	0.021		0.0394	0.0408	0.0432	0.0363	0.0333	0.0416	0.0363	0.0326		0.0568	0.0641	0.0583	0.0506	0.043	0.0492	0.0437	0.0247			26.8	0.059	0.0664	0.0578	0.0479	0.0399	0.0445	0.0424	0.02
27	0.06019	0.06451	0.0634	0.05575	0.03518	0.05033	0.03768	0.01056			27	0.0587	0.0657	0.0582	0.0429	0.0413	0.045	0.0426	0.0212		0.0392	0.0407	0.0429	0.036	0.0332	0.0414	0.0363	0.0322		0.057	0.0637	0.0581	0.0505	0.0428	0.049	0.0436	0.0247			27	0.0594	0.0662	0.0574	0.0471	0.0388	0.0436	0.042	0.0206
27.2	0.06329	0.06651	0.06065	0.0565	0.03548	0.04803	0.03853	0.01131			27.2	0.0587	0.0653	0.0583	0.0425	0.0403	0.0449	0.0424	0.0215		0.0391	0.04	0.0425	0.0357	0.0332	0.0413	0.0362	0.0321		0.0568	0.0629	0.0578	0.0503	0.0426	0.0488	0.0435	0.0245			27.2	0.0592	0.0656	0.0577	0.0475	0.0384	0.0436	0.0417	0.0208
27.4	0.06294	0.07146	0.059	0.05265	0.04243	0.04448	0.04033	0.02361			27.4	0.0581	0.0649	0.0584	0.0424	0.0397	0.0451	0.042	0.0213		0.0387	0.0398	0.0424	0.0355	0.0329	0.041	0.0358	0.032		0.0566	0.0627	0.0575	0.05	0.0423	0.0486	0.0436	0.0246			27.4	0.059	0.0655	0.0581	0.0482	0.0385	0.0441	0.0414	0.0213
27.6	0.06299	0.06906	0.057	0.0579	0.04318	0.04998	0.04143	0.02091			27.6	0.058	0.0646	0.0583	0.0418	0.0397	0.0453	0.0417	0.0216		0.0385	0.0402	0.0418	0.0353	0.0327	0.0406	0.0358	0.032		0.0559	0.062	0.0571	0.0497	0.0418	0.0485	0.0436	0.0245			27.6	0.0586	0.0654	0.0582	0.0489	0.0391	0.045	0.0409	0.0215
27.8	0.06239	0.06886	0.0605	0.05525	0.03993	0.04673	0.04283	0.01656			27.8	0.058	0.0644	0.0579	0.0417	0.04	0.0452	0.0416	0.0214		0.0376	0.0401	0.0417	0.0351	0.0324	0.0405	0.0355	0.0316		0.0556	0.062	0.0571	0.0492	0.0414	0.0483	0.0435	0.0244			27.8	0.0578	0.0646	0.0586	0.0496	0.0399	0.0456	0.0405	0.0199
28	0.06404	0.06856	0.06275	0.0527	0.03428	0.04978	0.03853	0.01276			28	0.0572	0.0645	0.0574	0.0419	0.0404	0.0449	0.0411	0.0214		0.0378	0.0394	0.0419	0.0347	0.032	0.04	0.0353	0.0317		0.0552	0.0618	0.0569	0.0488	0.0412	0.0481	0.0431	0.0242			28	0.0571	0.064	0.0585	0.05	0.0404	0.0457	0.0406	0.0198
28.2	0.06169	0.06641	0.06405	0.05005	0.03418	0.05063	0.03998	0.00746			28.2	0.057	0.0641	0.0573	0.0417	0.0404	0.0449	0.0408	0.0216		0.0377	0.0395	0.0417	0.0344	0.0318	0.0399	0.0351	0.0314		0.055	0.0616	0.0568	0.0486	0.041	0.0478	0.0426	0.0242			28.2	0.0566	0.0637	0.0576	0.0499	0.0405	0.0452	0.0405	0.021
28.4	0.06004	0.06286	0.06325	0.0526	0.03418	0.04833	0.03833	0.00946			28.4	0.0566	0.0635	0.0576	0.0413	0.0402	0.0448	0.0408	0.0214		0.0378	0.0392	0.0413	0.0344	0.0314	0.0398	0.0345	0.031		0.0547	0.0611	0.0566	0.0485	0.0409	0.0475	0.0422	0.0241			28.4	0.0565	0.0639	0.0568	0.0495	0.0401	0.0445	0.0406	0.0207
28.6	0.05939	0.06936	0.0601	0.05085	0.03418	0.04778	0.03708	0.01516			28.6	0.0561	0.0634	0.0571	0.0412	0.04	0.0448	0.0405	0.0214		0.0372	0.0393	0.0412	0.0344	0.0313	0.0396	0.0345	0.031		0.0543	0.0606	0.0563	0.0485	0.0408	0.0471	0.0419	0.024			28.6	0.0569	0.0637	0.0566	0.0489	0.0389	0.0435	0.0408	0.0209
28.8	0.06219	0.06751	0.05775	0.0501	0.03938	0.04938	0.03743	0.01401			28.8	0.0561	0.0633	0.0568	0.0411	0.0396	0.0443	0.0404	0.0213		0.0371	0.0395	0.0411	0.0341	0.0311	0.0394	0.0345	0.0306		0.0538	0.0605	0.0557	0.0484	0.0407	0.0469	0.0416	0.024			28.8	0.0574	0.0641	0.0567	0.048	0.0375	0.0428	0.0406	0.0202
29	0.06069	0.06206	0.05935	0.05175	0.03888	0.04838	0.03898	0.01561			29	0.0566	0.0635	0.0566	0.041	0.0391	0.044	0.0403	0.021		0.0369	0.0397	0.041	0.0338	0.0309	0.0393	0.0343	0.0304		0.0536	0.0613	0.0556	0.0482	0.0405	0.0466	0.0415	0.0239			29	0.0572	0.0645	0.057	0.0474	0.0367	0.0425	0.0401	0.0196
29.2	0.06314	0.06301	0.0613	0.05005	0.03508	0.04573	0.03853	0.01301			29.2	0.0564	0.0643	0.0567	0.0412	0.0386	0.0437	0.0399	0.0209		0.037	0.0393	0.0412	0.0335	0.0307	0.0391	0.0339	0.0303		0.0539	0.0613	0.0557	0.0478	0.0402	0.0465	0.0414	0.0236			29.2	0.0574	0.0648	0.0578	0.0469	0.0365	0.0426	0.0396	0.0203
29.4	0.06064	0.06686	0.0637	0.0537	0.03593	0.04753	0.03733	0.02181			29.4	0.0565	0.0648	0.057	0.0413	0.0384	0.0436	0.0397	0.0212		0.0371	0.0394	0.0413	0.0334	0.0304	0.039	0.0337	0.0301		0.0538	0.0612	0.0561	0.0476	0.0396	0.0464	0.0413	0.0236			29.4	0.057	0.0646	0.058	0.0469	0.0369	0.0432	0.0392	0.0207
29.6	0.06234	0.06481	0.06135	0.0565	0.03823	0.04803	0.03838	0.02346			29.6	0.0566	0.0644	0.0577	0.0408	0.0382	0.0434	0.0393	0.0215		0.0367	0.0393	0.0408	0.0334	0.0302	0.0389	0.0336	0.0299		0.054	0.0607	0.0561	0.0474	0.0393	0.0464	0.0412	0.0235			29.6	0.057	0.0646	0.0578	0.0471	0.0377	0.0438	0.0389	0.0213
29.8	0.06029	0.06621	0.0586	0.0554	0.03523	0.04328	0.03968	0.01241			29.8	0.0568	0.0637	0.0579	0.0408	0.0384	0.0435	0.0392	0.0215		0.0366	0.0393	0.0408	0.0334	0.0301	0.039	0.0334	0.0297		0.0543	0.0608	0.056	0.0474	0.0391	0.0463	0.041	0.0233			29.8	0.0569	0.0643	0.0576	0.0474	0.0383	0.0443	0.0389	0.0207
30	0.06069	0.07081	0.059	0.0541	0.03268	0.04773	0.03883	0.01116			30	0.0567	0.0638	0.0574	0.0407	0.0387	0.0438	0.0396	0.0212		0.0365	0.0389	0.0407	0.0331	0.0301	0.0388	0.0334	0.0295		0.0541	0.0607	0.0556	0.0473	0.0392	0.0463	0.0409	0.0232			30	0.0567	0.0644	0.0571	0.0472	0.0385	0.0438	0.0393	0.0195
30.2	0.05919	0.06966	0.0587	0.0551	0.03278	0.04713	0.03603	0.00761			30.2	0.0566	0.0639	0.057	0.0407	0.0389	0.0438	0.04	0.0212		0.0369	0.039	0.0407	0.0329	0.0303	0.0387	0.0334	0.0292		0.0547	0.0609	0.0556	0.0471	0.0393	0.046	0.0407	0.0234			30.2	0.0566	0.0649	0.0569	0.0473	0.0386	0.0431	0.0398	0.0202
30.4	0.06124	0.06806	0.0604	0.0514	0.03163	0.04573	0.04023	0.00826			30.4	0.0568	0.0642	0.0568	0.0404	0.0387	0.0433	0.0404	0.0213		0.0369	0.0387	0.0404	0.0329	0.0302	0.0387	0.0331	0.0295		0.0544	0.0608	0.0555	0.0468	0.0394	0.0458	0.0407	0.0236			30.4	0.0566	0.0649	0.0571	0.0475	0.0385	0.0427	0.0399	0.0206
30.6	0.06099	0.07406	0.06385	0.0449	0.03563	0.04663	0.03308	0.02626			30.6	0.0568	0.0641	0.0568	0.0405	0.0386	0.0428	0.0404	0.0215		0.0369	0.0385	0.0405	0.033	0.0303	0.0386	0.0331	0.0297		0.0543	0.0608	0.0558	0.0466	0.0394	0.0456	0.0408	0.0234			30.6	0.0569	0.0643	0.0578	0.0484	0.038	0.0428	0.04	0.0205
30.8	0.05879	0.07251	0.06285	0.0483	0.03313	0.04658	0.03628	0.02426			30.8	0.0565	0.0639	0.0574	0.0404	0.0386	0.0429	0.04	0.0214		0.0368	0.0384	0.0404	0.0331	0.0304	0.0384	0.0333	0.0295		0.0542	0.0608	0.0559	0.0463	0.0395	0.0456	0.0407	0.0234			30.8	0.057	0.0638	0.0583	0.0483	0.0377	0.0433	0.0402	0.0204
31	0.05894	0.06786	0.06245	0.0494	0.03633	0.04418	0.03548	0.01776			31	0.0563	0.0636	0.0577	0.0405	0.0387	0.0433	0.0397	0.021		0.0365	0.0386	0.0405	0.0331	0.0303	0.0387	0.0333	0.0294		0.0546	0.0607	0.056	0.0464	0.0395	0.0454	0.0407	0.0233			31	0.0572	0.0635	0.0587	0.048	0.0375	0.0431	0.0398	0.0196
31.2	0.06084	0.06436	0.061	0.0533	0.03703	0.04543	0.04013	0.01721			31.2	0.0566	0.0635	0.0578	0.0403	0.0388	0.0436	0.0395	0.0211		0.0367	0.0384	0.0403	0.0329	0.0304	0.0385	0.0333	0.0295		0.0545	0.0609	0.0558	0.0467	0.0395	0.0453	0.0406	0.0233			31.2	0.0575	0.0633	0.0592	0.0473	0.0378	0.0428	0.0393	0.0195
31.4	0.05644	0.05711	0.05775	0.05125	0.03813	0.04293	0.03643	0.01606			31.4	0.0571	0.0635	0.0578	0.0402	0.0391	0.0434	0.0396	0.0213		0.0373	0.0384	0.0402	0.0327	0.0306	0.0383	0.0331	0.0294		0.0548	0.0608	0.0557	0.0467	0.0394	0.0453	0.0406	0.0233			31.4	0.0576	0.0628	0.0592	0.0466	0.0378	0.0422	0.0387	0.0205
31.6	0.06264	0.05946	0.0581	0.05115	0.03368	0.04613	0.03673	0.01496			31.6	0.0572	0.0627	0.0583	0.0401	0.0391	0.0429	0.0395	0.0217		0.0372	0.0379	0.0401	0.0328	0.0304	0.0383	0.033	0.0295		0.0548	0.0601	0.0559	0.0469	0.0392	0.0453	0.0405	0.0234			31.6	0.0582	0.0624	0.0593	0.046	0.0381	0.0418	0.0385	0.0208
31.8	0.06129	0.06341	0.0591	0.04875	0.03538	0.04543	0.03718	0.01491			31.8	0.057	0.0619	0.0585	0.0401	0.0389	0.0427	0.0393	0.0217		0.0367	0.0379	0.0401	0.0331	0.0303	0.0383	0.0332	0.0296		0.0545	0.0598	0.0561	0.0468	0.0391	0.0454	0.0404	0.0233			31.8	0.0578	0.0627	0.0592	0.0459	0.0382	0.0417	0.0384	0.0209
32	0.05809	0.06101	0.06125	0.04785	0.03333	0.04638	0.03648	0.01416			32	0.0565	0.0619	0.0585	0.04	0.0386	0.0427	0.0391	0.0213		0.0363	0.0377	0.04	0.0331	0.0303	0.0383	0.0332	0.0294		0.054	0.0592	0.0561	0.0467	0.039	0.0454	0.0403	0.0232			32	0.0572	0.0625	0.0589	0.046	0.0381	0.0418	0.0386	0.0201
32.2	0.06084	0.06261	0.06205	0.04615	0.03778	0.04298	0.03503	0.00961			32.2	0.056	0.0618	0.0584	0.0399	0.0383	0.0428	0.039	0.021		0.0361	0.0373	0.0399	0.0329	0.0303	0.0384	0.0331	0.0293		0.0535	0.0588	0.0561	0.0467	0.039	0.0453	0.0402	0.0232			32.2	0.0571	0.0618	0.0585	0.0463	0.0377	0.042	0.0387	0.0195
32.4	0.05939	0.06466	0.05905	0.0488	0.03513	0.04193	0.03713	0.01246			32.4	0.0559	0.0609	0.0583	0.0395	0.038	0.0424	0.039	0.0211		0.0357	0.0376	0.0395	0.0325	0.0303	0.0379	0.033	0.0292		0.0529	0.0583	0.0556	0.0465	0.0389	0.0451	0.0401	0.0233			32.4	0.0566	0.0606	0.0579	0.0468	0.0372	0.0425	0.0386	0.0201
32.6	0.05629	0.05971	0.05825	0.04965	0.03783	0.03873	0.03878	0.01946			32.6	0.0556	0.0602	0.0576	0.0392	0.0376	0.0421	0.039	0.0215		0.0353	0.0367	0.0392	0.0323	0.0299	0.0379	0.0328	0.0293		0.0526	0.0577	0.0552	0.0461	0.0387	0.0448	0.0399	0.0232			32.6	0.0559	0.0599	0.0572	0.0472	0.0366	0.0427	0.0383	0.0208
32.8	0.05954	0.05881	0.0581	0.05185	0.03383	0.03753	0.03728	0.01731			32.8	0.0551	0.06	0.0571	0.0389	0.0373	0.042	0.0388	0.0216		0.035	0.0366	0.0389	0.0321	0.0296	0.0376	0.0326	0.0291		0.0526	0.0578	0.0549	0.0456	0.0384	0.0446	0.0397	0.0232			32.8	0.0555	0.0598	0.0567	0.0467	0.0361	0.0426	0.0384	0.0214
33	0.05949	0.06081	0.05775	0.0469	0.03518	0.04623	0.03553	0.01386			33	0.0549	0.0599	0.0569	0.0384	0.037	0.0421	0.0384	0.0211		0.0348	0.0361	0.0384	0.0318	0.0295	0.0373	0.0324	0.0291		0.052	0.057	0.0546	0.0453	0.0381	0.0441	0.0395	0.0231			33	0.0545	0.0596	0.0567	0.0459	0.036	0.0422	0.038	0.0202
33.2	0.05784	0.06086	0.06155	0.0436	0.03723	0.04908	0.03418	0.01136			33.2	0.0547	0.0594	0.0567	0.0382	0.0369	0.042	0.038	0.0205		0.0346	0.0361	0.0382	0.0317	0.0292	0.037	0.0322	0.0288		0.0521	0.057	0.0546	0.045	0.0379	0.0438	0.0392	0.023			33.2	0.0544	0.0593	0.0565	0.0453	0.0362	0.0416	0.0378	0.0189
33.4	0.05749	0.05826	0.0614	0.04975	0.03063	0.04433	0.03273	0.01271			33.4	0.0546	0.0591	0.0562	0.0379	0.037	0.0416	0.0378	0.0206		0.0345	0.0357	0.0379	0.0313	0.0289	0.0365	0.0319	0.0286		0.0519	0.0568	0.0542	0.0448	0.0377	0.0436	0.039	0.023			33.4	0.0542	0.0592	0.0563	0.0451	0.0364	0.0409	0.0375	0.0196
33.6	0.05869	0.05941	0.0599	0.0507	0.03303	0.04558	0.03343	0.01451			33.6	0.054	0.0591	0.0559	0.0381	0.0371	0.0411	0.0378	0.021		0.0345	0.0357	0.0381	0.0311	0.0287	0.0365	0.0317	0.0285		0.0515	0.0568	0.0542	0.0449	0.0375	0.0434	0.0389	0.0228			33.6	0.0534	0.0593	0.0561	0.0452	0.0364	0.0407	0.037	0.0207
33.8	0.05789	0.06196	0.0562	0.05495	0.03573	0.04623	0.03643	0.01201			33.8	0.0534	0.0589	0.0558	0.0379	0.0371	0.0409	0.0379	0.021		0.0344	0.0358	0.0379	0.0309	0.0284	0.0361	0.0313	0.0284		0.0512	0.0566	0.054	0.0447	0.0374	0.0435	0.0388	0.0228			33.8	0.0535	0.0593	0.0559	0.0454	0.0361	0.041	0.0372	0.0205
34	0.05869	0.06201	0.05495	0.053	0.03348	0.05058	0.03898	0.01141			34	0.0532	0.0592	0.0558	0.0378	0.0368	0.0408	0.038	0.0207		0.0339	0.0358	0.0378	0.031	0.0281	0.0362	0.0313	0.0282		0.0511	0.0567	0.054	0.0448	0.0371	0.0433	0.0387	0.0225			34	0.0535	0.0594	0.0555	0.0456	0.0355	0.041	0.0371	0.0203
34.2	0.05759	0.06296	0.05585	0.04575	0.03193	0.04323	0.03298	0.00926			34.2	0.0531	0.0591	0.0556	0.038	0.0363	0.0408	0.0378	0.0201		0.0339	0.0361	0.038	0.0308	0.0279	0.0362	0.0312	0.0278		0.0508	0.0566	0.0539	0.0445	0.0369	0.0433	0.0385	0.0225			34.2	0.0532	0.0594	0.0553	0.0454	0.035	0.0413	0.0369	0.0191
34.4	0.05779	0.06546	0.05825	0.0451	0.03473	0.04303	0.03703	0.00816			34.4	0.0529	0.0592	0.0556	0.0379	0.0359	0.0409	0.0377	0.02		0.0338	0.0358	0.0379	0.0306	0.0278	0.0362	0.0311	0.0277		0.0507	0.0565	0.0538	0.0443	0.0367	0.0432	0.0383	0.0224			34.4	0.0535	0.0593	0.0552	0.0449	0.0345	0.0411	0.0371	0.0183
34.6	0.05919	0.06406	0.0602	0.0392	0.02983	0.04383	0.03423	0.01901			34.6	0.0528	0.0591	0.0553	0.0379	0.0356	0.041	0.0378	0.0203		0.0339	0.0362	0.0379	0.0304	0.0276	0.036	0.0308	0.0274		0.0506	0.0561	0.0535	0.0442	0.0365	0.0431	0.0381	0.0223			34.6	0.0532	0.059	0.0552	0.0447	0.0343	0.0408	0.0369	0.0194
34.8	0.05539	0.06166	0.06055	0.04535	0.02943	0.04098	0.03433	0.01596			34.8	0.0533	0.0584	0.0554	0.0377	0.0355	0.0409	0.0376	0.0205		0.0335	0.0361	0.0377	0.0304	0.0275	0.0359	0.0307	0.0275		0.0505	0.0562	0.0532	0.0441	0.0364	0.0428	0.0379	0.0223			34.8	0.0531	0.0587	0.0551	0.0446	0.0347	0.0403	0.0367	0.0201
35	0.05629	0.06231	0.0587	0.0472	0.04018	0.04173	0.03213	0.01416			35	0.0533	0.0584	0.0552	0.0379	0.0357	0.0407	0.0372	0.0206		0.0334	0.0356	0.0379	0.0304	0.0274	0.0361	0.0307	0.0273		0.0508	0.0557	0.053	0.0439	0.0363	0.0426	0.0378	0.022			35	0.0532	0.0586	0.0549	0.0447	0.0351	0.0399	0.0369	0.0202
35.2	0.05574	0.06156	0.056	0.0483	0.03688	0.04508	0.03708	0.01181			35.2	0.053	0.0581	0.0547	0.0377	0.036	0.0403	0.0369	0.0205		0.0335	0.0354	0.0377	0.0303	0.0274	0.0359	0.0306	0.0272		0.0511	0.0557	0.053	0.0437	0.0363	0.0424	0.0377	0.0221			35.2	0.0531	0.0586	0.0544	0.0447	0.0354	0.0396	0.0368	0.0199
35.4	0.05394	0.06031	0.05325	0.05325	0.03668	0.04513	0.03883	0.00906			35.4	0.0531	0.058	0.0544	0.0374	0.0362	0.04	0.0368	0.0201		0.0331	0.0354	0.0374	0.0303	0.0273	0.036	0.0307	0.0271		0.0508	0.0556	0.0527	0.0435	0.0362	0.0422	0.0377	0.0221			35.4	0.0528	0.0581	0.0543	0.0445	0.0355	0.0396	0.0367	0.0184
35.6	0.05269	0.06021	0.05245	0.0504	0.03338	0.04743	0.03358	0.00841			35.6	0.053	0.0578	0.0539	0.0373	0.0361	0.0399	0.037	0.02		0.0332	0.0355	0.0373	0.0301	0.0273	0.0357	0.0305	0.027		0.0509	0.0555	0.0528	0.0435	0.0361	0.0422	0.0376	0.022			35.6	0.0531	0.0578	0.0541	0.0444	0.0353	0.0395	0.0365	0.0185
35.8	0.05499	0.05776	0.0578	0.0475	0.03283	0.04673	0.03438	0.01136			35.8	0.0532	0.0577	0.0539	0.0372	0.0359	0.0398	0.0372	0.02		0.0332	0.0349	0.0372	0.0298	0.0274	0.0354	0.0304	0.0271		0.0509	0.0551	0.0528	0.0434	0.036	0.0422	0.0376	0.0219			35.8	0.0531	0.0575	0.0538	0.0444	0.0352	0.0396	0.0361	0.0195
36	0.05424	0.05836	0.06235	0.04125	0.03028	0.04493	0.03118	0.01271			36	0.0528	0.057	0.054	0.0371	0.0356	0.0399	0.0371	0.0203		0.0335	0.0347	0.0371	0.0297	0.0273	0.0352	0.0302	0.0269		0.0509	0.0548	0.0527	0.0435	0.036	0.0421	0.0375	0.0218			36	0.053	0.0572	0.0541	0.0442	0.035	0.0396	0.0362	0.0196
36.2	0.05639	0.05996	0.0619	0.04245	0.02933	0.04213	0.03298	0.01201			36.2	0.0528	0.0568	0.0541	0.0368	0.0353	0.0399	0.0369	0.0204		0.0333	0.0345	0.0368	0.0296	0.0272	0.0352	0.0301	0.0271		0.0504	0.0545	0.0525	0.0437	0.036	0.0422	0.0374	0.022			36.2	0.053	0.0568	0.0542	0.044	0.035	0.0395	0.0363	0.0199
36.4	0.05639	0.05716	0.05645	0.04335	0.03388	0.04038	0.03208	0.01096			36.4	0.0525	0.0564	0.0537	0.0367	0.0353	0.04	0.0365	0.0202		0.0332	0.0342	0.0367	0.0298	0.0273	0.0352	0.0301	0.0269		0.0502	0.0544	0.0522	0.0438	0.0361	0.0421	0.0374	0.022			36.4	0.0529	0.0562	0.0541	0.0439	0.0348	0.0393	0.0361	0.0195
36.6	0.05454	0.05821	0.0542	0.0417	0.03768	0.03943	0.03483	0.00936			36.6	0.0525	0.0561	0.0537	0.0366	0.0354	0.0399	0.0363	0.0198		0.033	0.0343	0.0366	0.0297	0.0273	0.035	0.0301	0.0268		0.05	0.0538	0.052	0.0439	0.0361	0.0419	0.0373	0.0219			36.6	0.0524	0.0562	0.0541	0.0437	0.0346	0.0391	0.0361	0.0185
36.8	0.05514	0.06226	0.05205	0.0453	0.04013	0.03923	0.02898	0.01001			36.8	0.052	0.0562	0.0536	0.0364	0.0356	0.0397	0.0362	0.0198		0.0328	0.0343	0.0364	0.0296	0.0273	0.035	0.0302	0.0267		0.0498	0.0537	0.052	0.0439	0.0361	0.0417	0.0372	0.022			36.8	0.052	0.0563	0.0536	0.0438	0.0342	0.039	0.036	0.019
37	0.05299	0.06066	0.05385	0.04555	0.03893	0.04408	0.03513	0.01616			37	0.0516	0.0559	0.0537	0.0365	0.0355	0.0395	0.0362	0.0202		0.0327	0.0338	0.0365	0.0295	0.0271	0.0349	0.03	0.0268		0.0492	0.0533	0.0518	0.0437	0.036	0.0415	0.037	0.0221			37	0.0517	0.0565	0.0535	0.044	0.0339	0.0389	0.0359	0.0196
37.2	0.05514	0.05941	0.0544	0.04455	0.02963	0.04338	0.03658	0.01411			37.2	0.0514	0.0559	0.0539	0.0365	0.0353	0.0394	0.0361	0.0204		0.033	0.0342	0.0365	0.0294	0.027	0.0348	0.03	0.0269		0.0492	0.0535	0.0519	0.0438	0.0358	0.0414	0.0369	0.022			37.2	0.0513	0.0566	0.0535	0.0441	0.0336	0.039	0.036	0.0199
37.4	0.05389	0.05621	0.0565	0.05015	0.03318	0.04563	0.03578	0.01136			37.4	0.0506	0.056	0.0536	0.0362	0.0349	0.0395	0.0359	0.0205		0.0327	0.0342	0.0362	0.0293	0.0269	0.0346	0.0299	0.0267		0.0487	0.0535	0.0517	0.0436	0.0355	0.0414	0.0367	0.0219			37.4	0.0513	0.0563	0.0533	0.0442	0.0333	0.0391	0.0358	0.0202
37.6	0.05264	0.05581	0.0569	0.0482	0.03053	0.04438	0.03398	0.00881			37.6	0.0503	0.0556	0.0535	0.0363	0.0345	0.0395	0.0357	0.0197		0.0326	0.034	0.0363	0.0293	0.0267	0.0347	0.0297	0.0267		0.0486	0.053	0.0515	0.0436	0.0352	0.0415	0.0365	0.0217			37.6	0.0507	0.0558	0.0533	0.0443	0.0331	0.0393	0.0352	0.0191
37.8	0.05324	0.05841	0.0552	0.04585	0.03163	0.03973	0.03353	0.01061			37.8	0.0501	0.0551	0.0532	0.0362	0.0341	0.0396	0.0355	0.0193		0.0324	0.0342	0.0362	0.0292	0.0266	0.0344	0.0296	0.0266		0.0483	0.0532	0.0513	0.0435	0.0349	0.0414	0.0363	0.0218			37.8	0.0504	0.0554	0.053	0.0443	0.033	0.0393	0.0347	0.0178
38	0.05459	0.06056	0.0551	0.03885	0.03138	0.03943	0.03273	0.01031			38	0.0498	0.0552	0.0529	0.036	0.0337	0.0395	0.0353	0.0195		0.0323	0.0343	0.036	0.029	0.0265	0.0344	0.0295	0.0264		0.0478	0.0532	0.0509	0.0434	0.0347	0.0413	0.0361	0.0217			38	0.05	0.0552	0.0527	0.0444	0.0329	0.0392	0.0343	0.0186
38.2	0.05464	0.05766	0.0474	0.04325	0.03253	0.03873	0.03083	0.01721			38.2	0.0495	0.0554	0.0526	0.036	0.0334	0.0394	0.0349	0.0199		0.0319	0.0341	0.036	0.0289	0.0263	0.0343	0.0292	0.0262		0.0479	0.0528	0.0511	0.0431	0.0344	0.0412	0.0359	0.0216			38.2	0.0501	0.0549	0.0526	0.0438	0.0328	0.0387	0.0341	0.0193
38.4	0.05509	0.05761	0.04795	0.04425	0.03283	0.04013	0.02953	0.01671			38.4	0.0498	0.0551	0.0525	0.0361	0.0333	0.0392	0.0347	0.0203		0.0324	0.0337	0.0361	0.0287	0.0263	0.0343	0.0293	0.0263		0.0476	0.0526	0.0509	0.0429	0.0342	0.0411	0.0357	0.0214			38.4	0.0497	0.0548	0.0527	0.0433	0.0327	0.0383	0.0341	0.0194
38.6	0.05259	0.05896	0.05305	0.03845	0.03343	0.04008	0.03128	0.01406			38.6	0.0495	0.0548	0.0524	0.0359	0.0331	0.0388	0.0344	0.0196		0.0322	0.0336	0.0359	0.0286	0.0261	0.034	0.0292	0.026		0.0474	0.0524	0.0507	0.0427	0.034	0.0409	0.0355	0.0214			38.6	0.0493	0.0548	0.0521	0.0427	0.0325	0.0379	0.0342	0.0194
38.8	0.05104	0.05536	0.05635	0.04335	0.02248	0.04188	0.03273	0.01081			38.8	0.0493	0.0546	0.0523	0.0357	0.0329	0.0386	0.0342	0.019		0.0318	0.0334	0.0357	0.0286	0.0259	0.0342	0.029	0.0259		0.0472	0.0523	0.0505	0.0424	0.0339	0.0407	0.0354	0.0212			38.8	0.0491	0.0549	0.052	0.0422	0.0322	0.0378	0.034	0.0183
39	0.05384	0.05586	0.05965	0.0471	0.02468	0.03828	0.03483	0.01076			39	0.0492	0.0545	0.0521	0.0356	0.0328	0.0384	0.0342	0.019		0.0315	0.0333	0.0356	0.0286	0.0258	0.034	0.0289	0.0258		0.0469	0.0522	0.0501	0.0421	0.0338	0.0404	0.0354	0.0211			39	0.049	0.0545	0.052	0.0418	0.0321	0.038	0.0336	0.0177
39.2	0.05314	0.05601	0.0566	0.055	0.02548	0.03953	0.03338	0.01131			39.2	0.049	0.0542	0.0519	0.0355	0.0328	0.0383	0.0343	0.0192		0.0315	0.0327	0.0355	0.0283	0.0259	0.0339	0.0289	0.0257		0.0469	0.0517	0.05	0.0418	0.0338	0.0401	0.0352	0.0211			39.2	0.0492	0.0543	0.052	0.0419	0.0322	0.0381	0.0335	0.0182
39.4	0.05264	0.05376	0.05305	0.04695	0.02458	0.04083	0.02838	0.01211			39.4	0.0488	0.0539	0.0517	0.0353	0.033	0.0382	0.0343	0.0194		0.0313	0.0328	0.0353	0.0281	0.0258	0.0337	0.0287	0.0255		0.0468	0.0515	0.0498	0.0415	0.0337	0.0399	0.0352	0.021			39.4	0.0491	0.0539	0.0515	0.0421	0.0323	0.0382	0.0338	0.019
39.6	0.04919	0.05741	0.0511	0.0414	0.02783	0.04243	0.02928	0.01211			39.6	0.0488	0.0536	0.0513	0.0348	0.0332	0.0381	0.0343	0.0196		0.0311	0.0327	0.0348	0.028	0.0257	0.0336	0.0285	0.0257		0.0466	0.0513	0.0497	0.0412	0.0337	0.0398	0.0352	0.0209			39.6	0.0492	0.0536	0.0513	0.0421	0.0324	0.0382	0.034	0.0191
39.8	0.05139	0.05711	0.04925	0.0439	0.02928	0.03863	0.03238	0.00931			39.8	0.0488	0.0535	0.0511	0.0348	0.0334	0.0379	0.0343	0.0192		0.0312	0.0323	0.0348	0.028	0.0256	0.0334	0.0285	0.0257		0.0466	0.0511	0.0496	0.041	0.0335	0.0397	0.0352	0.0209			39.8	0.0491	0.0534	0.051	0.0419	0.0325	0.038	0.0341	0.0191
40	0.05084	0.05451	0.05135	0.0416	0.03228	0.04173	0.03143	0.00981			40	0.0484	0.0533	0.051	0.0347	0.0334	0.0378	0.0342	0.0188		0.031	0.0323	0.0347	0.0278	0.0255	0.0332	0.0286	0.0256		0.0467	0.0508	0.0495	0.0408	0.0334	0.0395	0.0351	0.0209			40	0.0489	0.0533	0.0509	0.0416	0.0326	0.0375	0.0341	0.0184
40.2	0.04924	0.05616	0.05395	0.0419	0.03098	0.03753	0.03103	0.01376			40.2	0.0486	0.0533	0.051	0.0346	0.0333	0.0376	0.0343	0.0188		0.0312	0.0321	0.0346	0.0277	0.0254	0.0331	0.0284	0.0254		0.0465	0.0506	0.0494	0.0407	0.0333	0.0393	0.0349	0.0208			40.2	0.0486	0.0533	0.0509	0.0413	0.0326	0.037	0.0341	0.0177
40.4	0.05214	0.05481	0.05675	0.044	0.03183	0.03878	0.03193	0.01396			40.4	0.0486	0.0528	0.051	0.0346	0.0332	0.0375	0.0345	0.0192		0.0308	0.0321	0.0346	0.0277	0.0252	0.0331	0.0282	0.0255		0.0464	0.0505	0.0492	0.0406	0.0332	0.0392	0.0348	0.0209			40.4	0.0484	0.0533	0.0509	0.0413	0.0323	0.0366	0.0344	0.0183
40.6	0.04819	0.05431	0.0562	0.04355	0.03003	0.03918	0.03228	0.01481			40.6	0.0483	0.0526	0.051	0.0345	0.033	0.0372	0.0346	0.0193		0.0307	0.0321	0.0345	0.0277	0.0251	0.033	0.0282	0.0253		0.0462	0.0503	0.049	0.0405	0.0331	0.0391	0.0347	0.0208			40.6	0.0482	0.0527	0.0509	0.0415	0.032	0.0367	0.0346	0.0186
40.8	0.04769	0.05531	0.0521	0.04265	0.02873	0.03783	0.02978	0.01001			40.8	0.048	0.052	0.0507	0.0345	0.0327	0.0371	0.0346	0.0193		0.0308	0.032	0.0345	0.0275	0.0252	0.033	0.0282	0.0251		0.0459	0.0498	0.049	0.0404	0.033	0.0389	0.0346	0.0207			40.8	0.0479	0.052	0.0508	0.0415	0.0317	0.0368	0.0345	0.0188
41	0.04974	0.05426	0.05115	0.0411	0.02733	0.03723	0.02953	0.00726			41	0.0477	0.0517	0.0506	0.0344	0.0325	0.0371	0.0345	0.0189		0.0306	0.0317	0.0344	0.0275	0.025	0.0329	0.0281	0.0252		0.0456	0.0496	0.0488	0.0402	0.0329	0.0387	0.0345	0.0206			41	0.0478	0.0518	0.0506	0.0414	0.0315	0.0368	0.0341	0.019
41.2	0.04819	0.05396	0.049	0.0409	0.03198	0.03843	0.03073	0.00751			41.2	0.0473	0.0518	0.0503	0.0342	0.0323	0.037	0.034	0.0187		0.0303	0.0319	0.0342	0.0275	0.025	0.0328	0.028	0.0252		0.0453	0.0493	0.0486	0.04	0.0327	0.0385	0.0343	0.0206			41.2	0.0472	0.0516	0.0502	0.0411	0.0313	0.0366	0.0334	0.0182
41.4	0.05029	0.05276	0.04935	0.0388	0.02698	0.03703	0.03208	0.01116			41.4	0.0468	0.0516	0.0504	0.034	0.0321	0.037	0.0338	0.0188		0.03	0.0313	0.034	0.0274	0.0248	0.0327	0.0279	0.025		0.0451	0.0489	0.0484	0.0399	0.0325	0.0384	0.0341	0.0205			41.4	0.047	0.051	0.05	0.041	0.0312	0.0365	0.0329	0.0176
41.6	0.04959	0.05296	0.05065	0.0386	0.02923	0.03738	0.02848	0.01136			41.6	0.0467	0.0513	0.0502	0.0341	0.0318	0.0369	0.0336	0.0189		0.0301	0.0312	0.0341	0.0272	0.0247	0.0326	0.0279	0.0249		0.0446	0.0486	0.0482	0.0397	0.0323	0.0382	0.0339	0.0205			41.6	0.0469	0.0505	0.0498	0.0407	0.031	0.0361	0.0326	0.018
41.8	0.04749	0.05171	0.05215	0.03705	0.02728	0.03913	0.02818	0.00976			41.8	0.0465	0.0507	0.0501	0.0336	0.0316	0.0367	0.0332	0.0193		0.0297	0.0307	0.0336	0.0269	0.0246	0.0323	0.0277	0.0249		0.0446	0.0484	0.0479	0.0395	0.0321	0.038	0.0337	0.0204			41.8	0.0465	0.0505	0.0498	0.0403	0.0308	0.036	0.0323	0.0187
42	0.04894	0.05311	0.05355	0.041	0.02618	0.03608	0.02908	0.00941			42	0.0461	0.0502	0.0498	0.0335	0.0316	0.0366	0.0328	0.0193		0.0293	0.0306	0.0335	0.0268	0.0243	0.0323	0.0275	0.0247		0.0442	0.0479	0.0477	0.0393	0.0318	0.0378	0.0334	0.0203			42	0.046	0.0503	0.0496	0.0399	0.0307	0.0359	0.0323	0.0188
42.2	0.04619	0.05396	0.05175	0.04185	0.03158	0.03663	0.03038	0.00876			42.2	0.0458	0.0496	0.0495	0.0332	0.0315	0.0364	0.0325	0.0188		0.0291	0.0302	0.0332	0.0266	0.0241	0.032	0.0272	0.0246		0.0439	0.0475	0.0475	0.0391	0.0316	0.0377	0.0333	0.0202			42.2	0.0457	0.0496	0.0492	0.0398	0.0304	0.0358	0.0321	0.0189
42.4	0.04959	0.05606	0.0507	0.04045	0.02878	0.03888	0.03053	0.00996			42.4	0.0456	0.049	0.0491	0.0329	0.0314	0.0361	0.0323	0.0185		0.0288	0.0295	0.0329	0.0263	0.024	0.0318	0.0272	0.0244		0.0437	0.047	0.0472	0.039	0.0314	0.0375	0.0331	0.0201			42.4	0.0456	0.049	0.0489	0.0397	0.0302	0.0358	0.0316	0.0179
42.6	0.04819	0.05531	0.05005	0.0381	0.02698	0.03883	0.03068	0.00851			42.6	0.0451	0.0485	0.0486	0.0325	0.0311	0.0358	0.0321	0.0185		0.0286	0.0295	0.0325	0.0261	0.0238	0.0315	0.0269	0.0242		0.0433	0.0465	0.0468	0.0388	0.0312	0.0374	0.0329	0.02			42.6	0.0451	0.0487	0.0484	0.0398	0.0298	0.0357	0.0313	0.0169
42.8	0.04599	0.05246	0.0485	0.03855	0.02783	0.03848	0.03108	0.00956			42.8	0.0445	0.0481	0.0483	0.0321	0.0308	0.0355	0.0321	0.0187		0.0282	0.029	0.0321	0.0259	0.0236	0.0312	0.0268	0.0242		0.0428	0.0459	0.0465	0.0386	0.031	0.0372	0.0328	0.02			42.8	0.0448	0.0483	0.048	0.0395	0.0294	0.0353	0.0314	0.0172
43	0.04864	0.05051	0.0484	0.0369	0.02498	0.03823	0.02843	0.00856			43	0.0442	0.0479	0.048	0.0319	0.0304	0.0353	0.0321	0.0188		0.0277	0.0288	0.0319	0.0257	0.0234	0.031	0.0265	0.024		0.0424	0.0458	0.0462	0.0383	0.0308	0.037	0.0326	0.0199			43	0.0444	0.0481	0.0479	0.039	0.0291	0.0352	0.0313	0.0179
43.2	0.04649	0.05156	0.05035	0.03665	0.02758	0.03773	0.02968	0.00916			43.2	0.0438	0.0479	0.0477	0.0316	0.0299	0.0351	0.0319	0.0185		0.0275	0.0287	0.0316	0.0254	0.0232	0.0307	0.0263	0.0239		0.042	0.0454	0.046	0.0381	0.0306	0.0367	0.0325	0.0199			43.2	0.0439	0.0478	0.0478	0.0386	0.0288	0.0352	0.0314	0.0185
43.4	0.04749	0.05216	0.05365	0.036	0.02453	0.03543	0.02988	0.01016			43.4	0.0435	0.0476	0.0476	0.0314	0.0296	0.0351	0.0316	0.0183		0.0274	0.0283	0.0314	0.0251	0.0229	0.0305	0.0261	0.0238		0.0417	0.0453	0.0457	0.0377	0.0304	0.0364	0.0322	0.0198			43.4	0.0436	0.0475	0.0478	0.0383	0.0288	0.0349	0.0313	0.0183
43.6	0.04729	0.05231	0.0527	0.03435	0.02638	0.03433	0.02868	0.01291			43.6	0.0434	0.0474	0.0473	0.0313	0.0295	0.035	0.0313	0.018		0.0274	0.0283	0.0313	0.0249	0.0226	0.0302	0.0259	0.0236		0.0414	0.045	0.0455	0.0374	0.0301	0.0361	0.032	0.0197			43.6	0.0435	0.0471	0.0475	0.0381	0.0289	0.0344	0.0308	0.0176
43.8	0.04729	0.05266	0.0528	0.03725	0.02298	0.03433	0.02828	0.01031			43.8	0.0433	0.047	0.0471	0.031	0.0295	0.0348	0.0311	0.0183		0.027	0.0284	0.031	0.0247	0.0224	0.03	0.0257	0.0234		0.0413	0.0448	0.0453	0.0371	0.0298	0.0358	0.0318	0.0196			43.8	0.043	0.0469	0.0471	0.0379	0.029	0.034	0.0305	0.0169
44	0.04649	0.05086	0.0493	0.03915	0.02158	0.03593	0.02783	0.00956			44	0.043	0.0468	0.0469	0.031	0.0295	0.0346	0.031	0.0184		0.0268	0.0282	0.031	0.0246	0.0222	0.0299	0.0255	0.0232		0.0411	0.0446	0.0451	0.0369	0.0296	0.0356	0.0315	0.0195			44	0.0428	0.0467	0.0467	0.0378	0.0289	0.0338	0.0305	0.0171
44.2	0.04674	0.05146	0.04805	0.03755	0.02343	0.03593	0.02998	0.00706			44.2	0.0428	0.0467	0.0467	0.031	0.0295	0.0343	0.0309	0.0185		0.0268	0.0281	0.031	0.0244	0.0219	0.0298	0.0254	0.0231		0.0409	0.0445	0.0448	0.0367	0.0293	0.0355	0.0313	0.0194			44.2	0.0427	0.0468	0.0464	0.0379	0.0287	0.0337	0.0305	0.0177
44.4	0.04719	0.05261	0.04565	0.03615	0.02563	0.03548	0.03133	0.00961			44.4	0.0427	0.0466	0.0467	0.0309	0.0294	0.034	0.0308	0.0182		0.0268	0.0281	0.0309	0.0243	0.0218	0.0296	0.0252	0.023		0.0409	0.0443	0.0447	0.0366	0.0291	0.0353	0.0311	0.0193			44.4	0.0425	0.0467	0.0462	0.0377	0.0283	0.0336	0.0304	0.0178
44.6	0.04729	0.05216	0.04615	0.0371	0.02828	0.03678	0.02868	0.00986			44.6	0.0424	0.0464	0.0465	0.0307	0.0291	0.0338	0.0307	0.018		0.0266	0.0281	0.0307	0.0242	0.0217	0.0295	0.025	0.0227		0.0406	0.0441	0.0445	0.0365	0.0289	0.0353	0.0309	0.0192			44.6	0.0425	0.0465	0.0464	0.0375	0.028	0.0335	0.0302	0.0177
44.8	0.04609	0.04986	0.04985	0.0359	0.02888	0.03453	0.02768	0.01051			44.8	0.042	0.0463	0.0464	0.0307	0.0288	0.0336	0.0306	0.0181		0.0266	0.0281	0.0307	0.0241	0.0215	0.0295	0.0248	0.0226		0.0404	0.0439	0.0445	0.0364	0.0287	0.0351	0.0308	0.0191			44.8	0.0424	0.0462	0.0463	0.0373	0.0276	0.0334	0.0299	0.0174
45	0.04699	0.04971	0.05325	0.0371	0.02798	0.03543	0.02808	0.01136			45	0.0419	0.0461	0.0462	0.0307	0.0284	0.0335	0.0305	0.0177		0.0267	0.028	0.0307	0.0239	0.0214	0.0293	0.0248	0.0225		0.0403	0.0439	0.0444	0.0362	0.0285	0.035	0.0306	0.019			45	0.0422	0.0458	0.0462	0.0372	0.0274	0.0332	0.0295	0.0167
45.2	0.04599	0.05076	0.0523	0.0377	0.02728	0.03353	0.02513	0.00841			45.2	0.042	0.0461	0.0461	0.0306	0.0281	0.0336	0.0303	0.0177		0.0266	0.0278	0.0306	0.0238	0.0213	0.0293	0.0247	0.0223		0.0399	0.0437	0.0442	0.036	0.0283	0.0349	0.0304	0.019			45.2	0.0419	0.0459	0.0461	0.0371	0.0272	0.0333	0.0294	0.0166
45.4	0.04659	0.05291	0.0505	0.0341	0.02363	0.03453	0.02718	0.00736			45.4	0.0418	0.0459	0.046	0.0305	0.0279	0.0336	0.0302	0.0179		0.0264	0.0277	0.0305	0.0237	0.0211	0.0291	0.0245	0.0222		0.0398	0.0437	0.0441	0.0358	0.0282	0.0347	0.0303	0.0188			45.4	0.0417	0.0459	0.046	0.0371	0.0271	0.0333	0.0293	0.017
45.6	0.04589	0.05141	0.0507	0.03605	0.02418	0.03353	0.02683	0.00771			45.6	0.0418	0.0457	0.0461	0.0304	0.0278	0.0335	0.0299	0.0179		0.0262	0.0277	0.0304	0.0235	0.021	0.0289	0.0244	0.0221		0.0399	0.0436	0.0439	0.0355	0.0281	0.0345	0.0301	0.0188			45.6	0.0417	0.0459	0.0459	0.0369	0.027	0.0332	0.0293	0.0175
45.8	0.04404	0.05271	0.0466	0.0353	0.02283	0.03348	0.02963	0.00861			45.8	0.0419	0.0454	0.0459	0.0303	0.0278	0.0333	0.0296	0.0178		0.0261	0.0276	0.0303	0.0234	0.021	0.0289	0.0242	0.0219		0.0399	0.0432	0.0439	0.0354	0.028	0.0343	0.03	0.0189			45.8	0.0417	0.0455	0.0458	0.0367	0.027	0.033	0.0292	0.0176
46	0.04539	0.05376	0.04435	0.03335	0.02278	0.03633	0.02643	0.01136			46	0.0418	0.0454	0.0458	0.0302	0.0279	0.0331	0.0293	0.0178		0.0259	0.0275	0.0302	0.0232	0.0209	0.0287	0.0241	0.0218		0.0399	0.0432	0.0438	0.0352	0.028	0.0341	0.0299	0.0187			46	0.0417	0.0454	0.0457	0.0365	0.0269	0.0327	0.0289	0.0176
46.2	0.04674	0.05201	0.04465	0.0328	0.02378	0.03248	0.02758	0.00981			46.2	0.0417	0.0455	0.0457	0.03	0.028	0.0328	0.0292	0.0178		0.0259	0.0276	0.03	0.023	0.0208	0.0286	0.0239	0.0217		0.0399	0.043	0.0436	0.0351	0.0279	0.0339	0.0298	0.0187			46.2	0.0417	0.0454	0.0455	0.0363	0.0269	0.0326	0.0287	0.0167
46.4	0.04624	0.05291	0.04875	0.0358	0.02723	0.03363	0.03103	0.00736			46.4	0.0418	0.0457	0.0457	0.03	0.028	0.0325	0.0293	0.0179		0.0261	0.0278	0.03	0.0229	0.0207	0.0285	0.0238	0.0216		0.04	0.0431	0.0436	0.035	0.0278	0.0338	0.0297	0.0185			46.4	0.0417	0.0455	0.0454	0.0362	0.0269	0.0325	0.0286	0.0162
46.6	0.04724	0.05141	0.0517	0.0466	0.02863	0.03508	0.02793	0.01066			46.6	0.0419	0.0459	0.0456	0.0299	0.0278	0.0324	0.0294	0.0177		0.0261	0.0276	0.0299	0.0229	0.0207	0.0283	0.0238	0.0215		0.0399	0.0433	0.0436	0.0349	0.0278	0.0337	0.0296	0.0186			46.6	0.0419	0.0458	0.0453	0.0363	0.0268	0.0324	0.0286	0.0164
46.8	0.04604	0.05051	0.0501	0.04465	0.02538	0.03683	0.02843	0.01001			46.8	0.042	0.046	0.0458	0.03	0.0277	0.0323	0.0294	0.0177		0.0263	0.0277	0.03	0.0229	0.0207	0.0283	0.0237	0.0215		0.04	0.0434	0.0436	0.0348	0.0277	0.0336	0.0295	0.0186			46.8	0.0419	0.046	0.0456	0.0364	0.0267	0.0324	0.0286	0.017
47	0.04504	0.05151	0.04935	0.0386	0.02493	0.03528	0.02653	0.00871			47	0.042	0.0457	0.0459	0.03	0.0274	0.0323	0.0293	0.0176		0.0264	0.0276	0.03	0.0228	0.0207	0.0282	0.0236	0.0214		0.0402	0.0435	0.0438	0.0348	0.0276	0.0336	0.0294	0.0185			47	0.0421	0.0459	0.0458	0.0363	0.0265	0.0323	0.0287	0.0173
47.2	0.04474	0.05021	0.0471	0.03695	0.02658	0.03478	0.02498	0.00856			47.2	0.0422	0.0453	0.046	0.0301	0.0272	0.0325	0.0291	0.0175		0.0265	0.0272	0.0301	0.0229	0.0207	0.0282	0.0236	0.0215		0.0401	0.0432	0.0439	0.0348	0.0275	0.0335	0.0293	0.0184			47.2	0.0421	0.0456	0.046	0.0362	0.0263	0.0321	0.0286	0.0172
47.4	0.04339	0.05036	0.0447	0.03415	0.02898	0.03458	0.02648	0.00771			47.4	0.042	0.0448	0.0459	0.0301	0.0272	0.0327	0.0289	0.0173		0.0266	0.027	0.0301	0.023	0.0208	0.0284	0.0235	0.0214		0.0401	0.0427	0.0439	0.0348	0.0274	0.0335	0.0292	0.0183			47.4	0.0419	0.045	0.046	0.0361	0.0262	0.032	0.0284	0.0167
47.6	0.04449	0.04966	0.04425	0.03365	0.03108	0.03538	0.02823	0.00836			47.6	0.0415	0.0444	0.0458	0.0299	0.0272	0.0327	0.0288	0.0175		0.0264	0.0268	0.0299	0.023	0.0209	0.0284	0.0237	0.0213		0.0399	0.0422	0.0438	0.0348	0.0273	0.0335	0.0291	0.0184			47.6	0.0417	0.0444	0.0457	0.036	0.0262	0.032	0.0282	0.0161
47.8	0.04344	0.05141	0.04425	0.03575	0.03043	0.03278	0.02813	0.00731			47.8	0.0411	0.044	0.0455	0.0298	0.0272	0.0327	0.0287	0.0175		0.0262	0.0266	0.0298	0.023	0.021	0.0286	0.0238	0.0214		0.0395	0.0418	0.0435	0.0348	0.0273	0.0335	0.029	0.0185			47.8	0.0413	0.0436	0.0454	0.036	0.0261	0.032	0.0282	0.0163
48	0.04314	0.05241	0.04545	0.038	0.02963	0.03303	0.02708	0.00756			48	0.0407	0.0437	0.0453	0.0297	0.0273	0.0324	0.0286	0.0178		0.0261	0.0264	0.0297	0.023	0.021	0.0285	0.0238	0.0214		0.0391	0.0414	0.0432	0.0347	0.0273	0.0334	0.0289	0.0185			48	0.0407	0.0433	0.0451	0.036	0.0261	0.0319	0.0283	0.0169
48.2	0.04269	0.04981	0.0487	0.0374	0.02923	0.03248	0.02798	0.00896			48.2	0.0402	0.0434	0.0449	0.0294	0.0272	0.032	0.0285	0.0177		0.0257	0.0265	0.0294	0.0229	0.021	0.0283	0.0238	0.0214		0.0385	0.0412	0.0428	0.0346	0.0272	0.0331	0.0288	0.0183			48.2	0.0402	0.0433	0.0446	0.0358	0.0261	0.0318	0.0282	0.0172
48.4	0.04459	0.05231	0.04615	0.0396	0.02468	0.03468	0.02628	0.00896			48.4	0.04	0.0435	0.0447	0.0292	0.027	0.0316	0.0283	0.0179		0.0256	0.0266	0.0292	0.0227	0.0209	0.0282	0.0237	0.0214		0.0384	0.0414	0.0425	0.0343	0.0271	0.0329	0.0288	0.0182			48.4	0.04	0.0436	0.0445	0.0356	0.026	0.0316	0.0282	0.0173
48.6	0.04489	0.05211	0.04795	0.0353	0.02278	0.03363	0.02608	0.01151			48.6	0.0401	0.0436	0.0445	0.0292	0.0267	0.0314	0.0281	0.0175		0.0254	0.0267	0.0292	0.0226	0.0206	0.0279	0.0235	0.0214		0.0384	0.0413	0.0424	0.0339	0.0269	0.0326	0.0286	0.0182			48.6	0.04	0.0438	0.0443	0.0353	0.0259	0.0312	0.0278	0.017
48.8	0.04354	0.04961	0.0485	0.03385	0.02673	0.03263	0.02638	0.00766			48.8	0.04	0.044	0.0443	0.0292	0.0263	0.0312	0.0279	0.0173		0.0255	0.0267	0.0292	0.0224	0.0204	0.0276	0.0234	0.0214		0.0384	0.0416	0.0424	0.0337	0.0267	0.0323	0.0285	0.0183			48.8	0.0401	0.0438	0.0444	0.035	0.0258	0.031	0.0274	0.0164
49	0.04274	0.05016	0.04595	0.03295	0.02728	0.03193	0.02558	0.00691			49	0.0402	0.0438	0.0443	0.0292	0.026	0.0313	0.0277	0.0172		0.0254	0.0269	0.0292	0.0223	0.0202	0.0275	0.0232	0.0213		0.0384	0.0414	0.0425	0.0335	0.0264	0.0321	0.0282	0.0183			49	0.0403	0.0439	0.0444	0.035	0.0256	0.0308	0.0272	0.0159
49.2	0.04394	0.05191	0.0443	0.03685	0.03073	0.03128	0.02598	0.00726			49.2	0.0403	0.0437	0.0444	0.0292	0.0257	0.0314	0.0276	0.0172		0.0256	0.0266	0.0292	0.0223	0.0201	0.0275	0.023	0.0211		0.0385	0.0415	0.0425	0.0335	0.0262	0.032	0.028	0.0181			49.2	0.0402	0.0438	0.0444	0.0351	0.0253	0.0308	0.0271	0.0162
49.4	0.04344	0.05251	0.0434	0.0367	0.02888	0.03313	0.02588	0.01131			49.4	0.0402	0.0432	0.0445	0.0293	0.0255	0.0314	0.0274	0.0171		0.0257	0.0265	0.0293	0.0223	0.02	0.0274	0.023	0.0211		0.0384	0.0414	0.0425	0.0336	0.026	0.0321	0.0278	0.0179			49.4	0.0402	0.0435	0.0443	0.0353	0.0251	0.0309	0.0269	0.0166
49.6	0.04304	0.05251	0.0433	0.0361	0.02738	0.03453	0.02753	0.01041			49.6	0.0399	0.0432	0.0445	0.0292	0.0254	0.0314	0.0271	0.0173		0.0259	0.0264	0.0292	0.0224	0.02	0.0276	0.023	0.021		0.0383	0.0411	0.0425	0.0339	0.0259	0.0323	0.0276	0.0179			49.6	0.04	0.0433	0.0443	0.0355	0.0248	0.0311	0.0269	0.0168
49.8	0.04249	0.05171	0.04445	0.03975	0.02538	0.03398	0.02883	0.00971			49.8	0.0394	0.043	0.0443	0.029	0.0254	0.0313	0.0269	0.0172		0.0256	0.0261	0.029	0.0224	0.0201	0.0277	0.023	0.0209		0.038	0.041	0.0423	0.034	0.0258	0.0324	0.0276	0.0179			49.8	0.0396	0.0431	0.0443	0.0355	0.0246	0.031	0.0269	0.0166
50	0.04239	0.05001	0.045	0.0376	0.02483	0.03468	0.02748	0.00906			50	0.039	0.043	0.0442	0.029	0.0254	0.0312	0.0269	0.017		0.0255	0.0261	0.029	0.0224	0.0202	0.0278	0.0231	0.0208		0.0376	0.041	0.0422	0.034	0.0258	0.0325	0.0276	0.0178			50	0.0392	0.043	0.0443	0.0353	0.0245	0.0309	0.0268	0.0161
50.2	0.04259	0.05041	0.04595	0.0335	0.02613	0.03388	0.02698	0.00796			50.2	0.0388	0.0429	0.0441	0.029	0.0252	0.0312	0.027	0.017		0.0254	0.026	0.029	0.0223	0.0202	0.0277	0.0231	0.0209		0.0372	0.0409	0.042	0.0339	0.0257	0.0325	0.0276	0.0178			50.2	0.0388	0.043	0.0442	0.035	0.0243	0.0308	0.0267	0.0157
50.4	0.04254	0.04936	0.04655	0.0344	0.02563	0.03033	0.02438	0.00691			50.4	0.0385	0.0431	0.0438	0.0289	0.0252	0.0311	0.0271	0.017		0.0252	0.0262	0.0289	0.0222	0.0202	0.0275	0.0232	0.0209		0.037	0.0409	0.0419	0.0337	0.0256	0.0323	0.0276	0.0177			50.4	0.0384	0.0428	0.044	0.0347	0.0241	0.0307	0.0267	0.0159
50.6	0.04204	0.04721	0.0469	0.03245	0.02723	0.03223	0.02578	0.00696			50.6	0.0385	0.043	0.0437	0.0289	0.0251	0.031	0.0272	0.017		0.0249	0.0264	0.0289	0.022	0.02	0.0274	0.0229	0.0208		0.037	0.0409	0.0418	0.0332	0.0255	0.0321	0.0276	0.0176			50.6	0.0385	0.0431	0.0437	0.0344	0.024	0.0308	0.0266	0.0163
50.8	0.04019	0.04906	0.0447	0.03315	0.02708	0.03233	0.02558	0.01161			50.8	0.0386	0.0431	0.0435	0.0289	0.0251	0.0308	0.0271	0.0172		0.0248	0.0266	0.0289	0.0218	0.0197	0.0272	0.0228	0.0208		0.0371	0.0411	0.0417	0.0329	0.0255	0.0318	0.0275	0.0177			50.8	0.0386	0.0431	0.0436	0.0342	0.0241	0.0307	0.0266	0.0165
51	0.04139	0.05221	0.0451	0.03345	0.02838	0.03128	0.02553	0.00841			51	0.0389	0.0429	0.0436	0.029	0.0252	0.0307	0.0269	0.0169		0.0248	0.0266	0.029	0.0218	0.0195	0.0272	0.0227	0.0207		0.0373	0.041	0.0416	0.0326	0.0254	0.0315	0.0274	0.0177			51	0.0389	0.0428	0.0434	0.034	0.0242	0.0305	0.0266	0.0164
51.2	0.04239	0.05371	0.04835	0.03225	0.02573	0.03063	0.02433	0.00726			51.2	0.0392	0.0424	0.0436	0.029	0.0254	0.0305	0.0267	0.0169		0.0248	0.0264	0.029	0.0217	0.0194	0.0271	0.0225	0.0205		0.0375	0.0408	0.0416	0.0324	0.0253	0.0312	0.0273	0.0177			51.2	0.0392	0.0424	0.0431	0.0338	0.0245	0.0302	0.0263	0.0163
51.4	0.04139	0.05551	0.04905	0.03665	0.02133	0.03273	0.02803	0.00786			51.4	0.0393	0.042	0.0435	0.0289	0.0255	0.0303	0.0267	0.0169		0.0249	0.0262	0.0289	0.0217	0.0194	0.0271	0.0224	0.0204		0.0377	0.0404	0.0415	0.0323	0.0253	0.031	0.0272	0.0176			51.4	0.0392	0.042	0.0432	0.0338	0.0248	0.0299	0.0262	0.0159
51.6	0.04179	0.05151	0.04905	0.03475	0.02613	0.03153	0.02648	0.00711			51.6	0.0391	0.0418	0.0433	0.0287	0.0255	0.0302	0.0266	0.0167		0.0249	0.0261	0.0287	0.0218	0.0194	0.0272	0.0223	0.0203		0.0375	0.0402	0.0414	0.0324	0.0253	0.0309	0.0271	0.0175			51.6	0.0392	0.0418	0.043	0.0338	0.025	0.0296	0.0262	0.0156
51.8	0.04184	0.05046	0.04605	0.03135	0.02563	0.03168	0.02643	0.01131			51.8	0.0389	0.0417	0.0431	0.0285	0.0254	0.03	0.0267	0.017		0.0249	0.0259	0.0285	0.0218	0.0196	0.0272	0.0224	0.0204		0.0373	0.0399	0.0412	0.0324	0.0253	0.031	0.027	0.0175			51.8	0.0391	0.0417	0.0429	0.0339	0.025	0.0295	0.0261	0.0157
52	0.04174	0.04981	0.0467	0.0337	0.02628	0.03248	0.02408	0.01006			52	0.0386	0.0417	0.0429	0.0285	0.0252	0.03	0.0267	0.0169		0.025	0.0257	0.0285	0.0218	0.0198	0.0273	0.0226	0.0204		0.0371	0.0401	0.0411	0.0325	0.0253	0.0312	0.0269	0.0175			52	0.0388	0.0419	0.0429	0.0341	0.0248	0.0295	0.0263	0.016
52.2	0.04159	0.05051	0.0458	0.03215	0.02628	0.03213	0.02638	0.00931			52.2	0.0384	0.042	0.043	0.0284	0.0249	0.03	0.0267	0.0167		0.0251	0.0258	0.0284	0.0217	0.0199	0.0272	0.0227	0.0204		0.0367	0.0401	0.041	0.0326	0.0252	0.0313	0.0269	0.0175			52.2	0.0384	0.0422	0.0431	0.0341	0.0245	0.0296	0.0264	0.0162
52.4	0.04234	0.04901	0.0442	0.03025	0.02803	0.03283	0.02643	0.00961			52.4	0.0382	0.0421	0.043	0.0285	0.0245	0.0301	0.0265	0.0168		0.0249	0.0261	0.0285	0.0217	0.0198	0.0271	0.0227	0.0206		0.0366	0.0403	0.041	0.0325	0.0251	0.0314	0.027	0.0173			52.4	0.0383	0.0423	0.043	0.0338	0.024	0.0297	0.0263	0.0163
52.6	0.04139	0.04846	0.0439	0.0321	0.02723	0.03203	0.02578	0.00716			52.6	0.0382	0.0423	0.043	0.0285	0.0243	0.0303	0.0265	0.0164		0.0248	0.026	0.0285	0.0217	0.0197	0.027	0.0225	0.0206		0.0367	0.0403	0.041	0.0323	0.025	0.0313	0.0269	0.0172			52.6	0.0384	0.0423	0.043	0.0336	0.0236	0.0299	0.0263	0.016
52.8	0.04189	0.04981	0.0443	0.0347	0.02803	0.03218	0.02773	0.00786			52.8	0.0383	0.0425	0.043	0.0289	0.0242	0.0305	0.0264	0.0163		0.025	0.0261	0.0289	0.0217	0.0196	0.0269	0.0225	0.0206		0.0368	0.0406	0.0409	0.0322	0.0249	0.0311	0.0268	0.0173			52.8	0.0385	0.0425	0.0431	0.0334	0.0234	0.03	0.0262	0.0158
53	0.04054	0.04801	0.04655	0.0356	0.02718	0.03193	0.02558	0.01456			53	0.0386	0.0426	0.0431	0.0289	0.0243	0.0305	0.0263	0.0167		0.0249	0.0262	0.0289	0.0215	0.0195	0.0268	0.0224	0.0205		0.0369	0.0405	0.0409	0.032	0.0248	0.0309	0.0267	0.0175			53	0.0386	0.0424	0.0431	0.0332	0.0233	0.03	0.026	0.0158
53.2	0.04124	0.04881	0.04805	0.0364	0.02553	0.03183	0.02553	0.01186			53.2	0.0391	0.0423	0.0433	0.0289	0.0246	0.0302	0.0261	0.0167		0.0249	0.0264	0.0289	0.0216	0.0193	0.0269	0.0223	0.0203		0.0372	0.0406	0.0409	0.032	0.0248	0.0307	0.0265	0.0175			53.2	0.039	0.0423	0.0431	0.0332	0.0236	0.03	0.0259	0.016
53.4	0.04109	0.05056	0.046	0.0338	0.02408	0.03078	0.02488	0.01056			53.4	0.0391	0.042	0.0433	0.0289	0.025	0.0298	0.026	0.0171		0.025	0.0264	0.0289	0.0217	0.0193	0.027	0.0222	0.0203		0.0374	0.0402	0.041	0.0319	0.0249	0.0305	0.0264	0.0175			53.4	0.039	0.042	0.0431	0.0334	0.0239	0.0299	0.0258	0.0162
53.6	0.03969	0.04791	0.0456	0.0334	0.02448	0.02938	0.02538	0.00836			53.6	0.0389	0.0418	0.0433	0.0288	0.0252	0.0294	0.026	0.0169		0.025	0.0265	0.0288	0.0217	0.0194	0.0271	0.0223	0.0202		0.0373	0.0403	0.0409	0.0321	0.0249	0.0304	0.0264	0.0173			53.6	0.0389	0.0417	0.0433	0.0336	0.0243	0.0296	0.0257	0.0164
53.8	0.04064	0.04806	0.0439	0.0344	0.02483	0.02958	0.02413	0.00651			53.8	0.0388	0.0418	0.0432	0.0287	0.0252	0.0291	0.0259	0.0166		0.0252	0.0264	0.0287	0.0217	0.0196	0.0272	0.0224	0.0202		0.037	0.0399	0.041	0.0322	0.0249	0.0304	0.0263	0.0172			53.8	0.0389	0.0417	0.0432	0.0336	0.0244	0.0294	0.0255	0.0163
54	0.04084	0.04751	0.04185	0.03395	0.02583	0.02893	0.02758	0.00726			54	0.0385	0.042	0.0431	0.0287	0.025	0.029	0.0259	0.0164		0.0253	0.0264	0.0287	0.0217	0.0197	0.0273	0.0224	0.0202		0.0371	0.0401	0.0409	0.0322	0.0248	0.0305	0.0264	0.0171			54	0.0386	0.0421	0.0431	0.0338	0.0244	0.029	0.0255	0.016
54.2	0.04159	0.04726	0.0421	0.034	0.02768	0.03103	0.02573	0.00611			54.2	0.0385	0.0422	0.0432	0.0288	0.0247	0.0291	0.026	0.0163		0.0255	0.0264	0.0288	0.0217	0.0197	0.0272	0.0226	0.0204		0.0367	0.0401	0.0408	0.0321	0.0247	0.0306	0.0264	0.0171			54.2	0.0384	0.0422	0.0431	0.0336	0.0241	0.0288	0.0255	0.0156
54.4	0.04069	0.04511	0.04545	0.03155	0.02603	0.03038	0.02628	0.01371			54.4	0.0384	0.0424	0.0431	0.0288	0.0242	0.0293	0.0261	0.0162		0.0253	0.0263	0.0288	0.0218	0.0198	0.0272	0.0226	0.0205		0.0367	0.0404	0.0408	0.0321	0.0245	0.0307	0.0264	0.017			54.4	0.0385	0.0423	0.043	0.0334	0.0237	0.0288	0.0255	0.0154
54.6	0.04009	0.04501	0.045	0.0318	0.02658	0.02943	0.02558	0.01146			54.6	0.0382	0.0423	0.0431	0.029	0.0237	0.0296	0.0261	0.0163		0.0252	0.0262	0.029	0.0219	0.0197	0.0272	0.0226	0.0205		0.0366	0.0405	0.0408	0.0319	0.0243	0.0307	0.0263	0.0171			54.6	0.0384	0.0422	0.043	0.0334	0.0232	0.0289	0.0256	0.0155
54.8	0.04179	0.04626	0.0444	0.0348	0.02683	0.03263	0.02483	0.01091			54.8	0.0383	0.0421	0.0429	0.0291	0.0235	0.0299	0.026	0.0162		0.0253	0.0264	0.0291	0.0218	0.0197	0.0272	0.0225	0.0205		0.0367	0.0404	0.0408	0.0318	0.0243	0.0306	0.0262	0.0171			54.8	0.0383	0.0422	0.0429	0.0333	0.0229	0.0292	0.0257	0.0156
55	0.04049	0.04616	0.0447	0.03425	0.02593	0.03088	0.02518	0.00861			55	0.0385	0.042	0.0428	0.029	0.0235	0.03	0.0257	0.0167		0.0251	0.0261	0.029	0.0218	0.0197	0.0271	0.0225	0.0204		0.0367	0.0405	0.0408	0.0317	0.0242	0.0304	0.026	0.0172			55	0.0384	0.0421	0.0425	0.0331	0.0228	0.0295	0.0256	0.016
55.2	0.04019	0.04836	0.0437	0.0363	0.02438	0.03133	0.02708	0.00791			55.2	0.0387	0.0417	0.0427	0.029	0.0238	0.0298	0.0254	0.0168		0.025	0.0264	0.029	0.0217	0.0197	0.0272	0.0224	0.0203		0.0367	0.0402	0.0407	0.0317	0.0243	0.0303	0.0259	0.0173			55.2	0.0387	0.0419	0.0426	0.0332	0.023	0.0295	0.0254	0.0162
55.4	0.03954	0.04836	0.04	0.03365	0.02603	0.03108	0.02533	0.00911			55.4	0.0386	0.0415	0.0426	0.0288	0.0241	0.0294	0.0252	0.0168		0.0251	0.0264	0.0288	0.0216	0.0197	0.0271	0.0224	0.0203		0.037	0.04	0.0406	0.0317	0.0244	0.0302	0.0258	0.0173			55.4	0.0386	0.0415	0.0427	0.0331	0.0234	0.0292	0.0251	0.0163
55.6	0.04109	0.04606	0.0408	0.03345	0.02588	0.03258	0.02628	0.00806			55.6	0.0386	0.0413	0.0425	0.0288	0.0245	0.029	0.0253	0.0168		0.025	0.0264	0.0288	0.0216	0.0198	0.0271	0.0225	0.0203		0.0371	0.04	0.0405	0.0318	0.0245	0.0301	0.0258	0.0172			55.6	0.0387	0.0416	0.0426	0.033	0.0237	0.0289	0.0249	0.0162
55.8	0.03924	0.04586	0.0403	0.028	0.02653	0.03048	0.02703	0.01056			55.8	0.0385	0.0413	0.0425	0.0287	0.0246	0.0286	0.0254	0.0166		0.0252	0.0264	0.0287	0.0216	0.0198	0.0272	0.0224	0.0204		0.0368	0.0399	0.0405	0.0319	0.0246	0.03	0.0259	0.0171			55.8	0.0386	0.0417	0.0425	0.0331	0.0239	0.0286	0.025	0.0161
56	0.04089	0.04686	0.04255	0.03015	0.02328	0.03063	0.02338	0.01326			56	0.0381	0.0414	0.0424	0.0287	0.0246	0.0284	0.0253	0.0165		0.0254	0.0263	0.0287	0.0217	0.0198	0.0271	0.0225	0.0205		0.0368	0.0402	0.0406	0.0318	0.0246	0.03	0.0259	0.0169			56	0.0383	0.0418	0.0426	0.0333	0.024	0.0284	0.025	0.0159
56.2	0.03964	0.04566	0.0474	0.0316	0.02688	0.03163	0.02453	0.01221			56.2	0.038	0.0419	0.0425	0.0287	0.0244	0.0285	0.0252	0.0164		0.0254	0.0262	0.0287	0.0218	0.0198	0.0272	0.0226	0.0205		0.0367	0.0401	0.0406	0.0318	0.0245	0.03	0.026	0.0168			56.2	0.0381	0.0419	0.0426	0.0332	0.0238	0.0285	0.0249	0.0159
56.4	0.04044	0.04701	0.04665	0.03495	0.02383	0.03103	0.02658	0.00876			56.4	0.0379	0.0419	0.0423	0.0289	0.024	0.0287	0.0251	0.0163		0.0255	0.0263	0.0289	0.0218	0.0197	0.0272	0.0225	0.0204		0.0365	0.0404	0.0408	0.0318	0.0244	0.03	0.026	0.0168			56.4	0.0381	0.042	0.0425	0.0334	0.0234	0.0286	0.0249	0.0159
56.6	0.03984	0.04766	0.0441	0.0367	0.02303	0.02678	0.02953	0.00726			56.6	0.0379	0.042	0.0425	0.0289	0.0235	0.0291	0.0252	0.0161		0.0254	0.0262	0.0289	0.0219	0.0197	0.0272	0.0226	0.0205		0.0364	0.0404	0.0408	0.0316	0.0243	0.0301	0.026	0.017			56.6	0.038	0.0419	0.0425	0.0334	0.0231	0.0288	0.0249	0.0158
56.8	0.03959	0.04881	0.04155	0.03715	0.02368	0.03143	0.02478	0.00686			56.8	0.0378	0.0418	0.0424	0.029	0.0232	0.0295	0.0252	0.0159		0.0254	0.0263	0.029	0.0219	0.0198	0.0272	0.0226	0.0204		0.0365	0.0403	0.0407	0.0316	0.0241	0.0302	0.0259	0.0169			56.8	0.0379	0.0418	0.0424	0.0334	0.0228	0.029	0.0249	0.0155
57	0.03969	0.04786	0.04115	0.035	0.02653	0.03098	0.02458	0.00656			57	0.0379	0.0418	0.0424	0.029	0.0231	0.0298	0.0252	0.0159		0.0254	0.0264	0.029	0.0219	0.0198	0.0273	0.0226	0.0204		0.0365	0.0403	0.0407	0.0316	0.024	0.0302	0.0257	0.017			57	0.0378	0.0417	0.0424	0.0332	0.0226	0.0293	0.025	0.0152
57.2	0.04039	0.04791	0.0403	0.03245	0.02473	0.03228	0.02583	0.01061			57.2	0.0379	0.0415	0.0424	0.029	0.0232	0.0297	0.0252	0.0162		0.0253	0.0264	0.029	0.0219	0.0199	0.0272	0.0226	0.0205		0.0363	0.0402	0.0405	0.0316	0.024	0.0301	0.0256	0.0169			57.2	0.0378	0.0416	0.0424	0.0332	0.0225	0.0295	0.0251	0.0152
57.4	0.04034	0.04641	0.044	0.0335	0.02658	0.03008	0.02678	0.00926			57.4	0.0378	0.0415	0.0425	0.029	0.0235	0.0293	0.025	0.0168		0.0253	0.0266	0.029	0.0219	0.0199	0.0273	0.0226	0.0205		0.0364	0.0399	0.0405	0.0316	0.024	0.0301	0.0255	0.0169			57.4	0.0379	0.0417	0.0423	0.033	0.0227	0.0293	0.0251	0.0157
57.6	0.03999	0.04511	0.0445	0.0347	0.02628	0.03228	0.02723	0.00916			57.6	0.0379	0.0413	0.0424	0.029	0.0237	0.0289	0.0249	0.0171		0.0253	0.0265	0.029	0.0218	0.0198	0.0272	0.0226	0.0205		0.0365	0.04	0.0404	0.0316	0.0241	0.0299	0.0255	0.0169			57.6	0.038	0.0417	0.0424	0.0329	0.023	0.0289	0.025	0.0163
57.8	0.04029	0.04691	0.04435	0.03565	0.02483	0.03128	0.02218	0.00806			57.8	0.0379	0.0414	0.0423	0.029	0.024	0.0285	0.025	0.0171		0.0253	0.0266	0.029	0.0218	0.0198	0.0273	0.0226	0.0205		0.0364	0.0399	0.0403	0.0315	0.0241	0.0298	0.0255	0.0169			57.8	0.038	0.0416	0.0424	0.0326	0.0232	0.0284	0.0248	0.0167
58	0.03929	0.04796	0.0429	0.03775	0.02178	0.03178	0.02563	0.00641			58	0.0379	0.0414	0.0422	0.029	0.024	0.0282	0.025	0.0164		0.0253	0.0266	0.029	0.0219	0.0198	0.0273	0.0226	0.0205		0.0364	0.0401	0.0404	0.0315	0.0242	0.0297	0.0255	0.0168			58	0.038	0.0414	0.0424	0.0325	0.0234	0.028	0.0247	0.0165
58.2	0.03889	0.04771	0.04365	0.03545	0.02333	0.03128	0.02398	0.00636			58.2	0.0377	0.0416	0.0422	0.0289	0.0238	0.0282	0.025	0.0157		0.0251	0.0263	0.0289	0.0218	0.0197	0.0273	0.0226	0.0204		0.0364	0.0399	0.0403	0.0314	0.0242	0.0296	0.0256	0.0167			58.2	0.0379	0.0416	0.0423	0.0324	0.0234	0.0278	0.0248	0.0159
58.4	0.03924	0.04696	0.0409	0.03015	0.02478	0.03193	0.02653	0.00866			58.4	0.0376	0.0417	0.0422	0.029	0.0235	0.0284	0.0249	0.0154		0.0252	0.0265	0.029	0.0219	0.0197	0.0273	0.0226	0.0204		0.0364	0.0399	0.0404	0.0314	0.0241	0.0296	0.0256	0.0167			58.4	0.0378	0.0416	0.0422	0.0325	0.0233	0.0278	0.0247	0.0151
58.6	0.04034	0.04641	0.0404	0.03315	0.02518	0.03053	0.02438	0.01056			58.6	0.0376	0.0418	0.0422	0.0289	0.0233	0.0287	0.0249	0.0155		0.0252	0.0265	0.0289	0.0218	0.0197	0.0273	0.0226	0.0204		0.0363	0.04	0.0404	0.0313	0.0241	0.0296	0.0256	0.0167			58.6	0.0377	0.0417	0.0421	0.0326	0.0232	0.028	0.0247	0.0148
58.8	0.03974	0.04586	0.04215	0.03125	0.02648	0.03018	0.02423	0.00891			58.8	0.0377	0.0419	0.0422	0.0289	0.0232	0.0289	0.0249	0.0158		0.0252	0.0264	0.0289	0.0219	0.0198	0.0272	0.0226	0.0205		0.0361	0.0399	0.0403	0.0312	0.024	0.0296	0.0255	0.0167			58.8	0.0376	0.0419	0.042	0.0328	0.0229	0.0285	0.0248	0.0149
59											59	0.0377	0.0416	0.0422	0.0289	0.0232	0.029	0.0247	0.0161		0.0254	0.0261	0.0289	0.0219	0.0198	0.0272	0.0225	0.0205		0.0363	0.0399	0.0404	0.0312	0.024	0.0297	0.0254	0.0168			59	0.0377	0.0419	0.042	0.0329	0.0228	0.0288	0.0248	0.0153
59.2											59.2	0.0378	0.0413	0.0422	0.0289	0.0233	0.0289	0.0246	0.0162		0.0252	0.0261	0.0289	0.0218	0.0198	0.0272	0.0226	0.0205		0.0362	0.0398	0.0401	0.0313	0.0239	0.0297	0.0253	0.0169			59.2	0.0377	0.0416	0.042	0.033	0.0227	0.0289	0.0247	0.0158
59.4											59.4	0.0376	0.0411	0.042	0.0288	0.0235	0.0287	0.0245	0.0162		0.0251	0.0261	0.0288	0.0218	0.0198	0.0272	0.0226	0.0205		0.0361	0.0396	0.0402	0.0313	0.0239	0.0297	0.0253	0.0169			59.4	0.0377	0.0413	0.0422	0.0327	0.0227	0.0288	0.0245	0.0159
59.6											59.6	0.0374	0.041	0.042	0.0287	0.0236	0.0284	0.0245	0.016		0.0249	0.0258	0.0287	0.0218	0.0198	0.0272	0.0225	0.0205		0.036	0.0392	0.0401	0.0313	0.0239	0.0297	0.0253	0.0168			59.6	0.0376	0.0411	0.0421	0.0325	0.0228	0.0285	0.0244	0.0159
59.8											59.8	0.0375	0.0407	0.0419	0.0287	0.0237	0.0282	0.0246	0.0159		0.0249	0.0258	0.0287	0.0218	0.0197	0.0272	0.0226	0.0205		0.036	0.039	0.04	0.0313	0.0239	0.0296	0.0253	0.0167			59.8	0.0374	0.0408	0.0419	0.0325	0.023	0.0282	0.0245	0.0156

## Sheet: RMSE_BR_0.1
t	S3	S4	S5	S6	S7	S8	S9	S10		HEC_M0.1_P3	HEC_M0.1_P4	HEC_M0.1_P5	HEC_M0.1_P6	HEC_M0.1_P7	HEC_M0.1_P8	HEC_M0.1_P9	HEC_M0.1_P10		Error_3	Error_4	Error_5	Error_6	Error_7	Error_8	Error_9	Error_10		Error^2_3	Error^2_4	Error^2_5	Error^2_6	Error^2_7	Error^2_8	Error^2_9	Error^2_10		RMSE_3	RMSE_4	RMSE_5	RMSE_6	RMSE_7	RMSE_8	RMSE_9	RMSE_10
0	-1e-05	-4e-05	0	-0.00015	-2e-05	-7e-05	3e-05	1e-05		0	0	0	0	0	0	0	0		-1e-05	-4e-05	0	-0.00015	-2e-05	-7e-05	3e-05	1e-05		1e-10	1.6e-09	0	2.25e-08	4e-10	4.9e-09	9e-10	1e-10		1.83986	2.29452	1.66286	1.4159	0.644329	0.577615	0.508247	1.42172
0.2	-6e-05	1e-05	-5e-05	0.00015	8e-05	0.00013	-0.00017	1e-05		0	0	0	0	0	0	0	0		-6e-05	1e-05	-5e-05	0.00015	8e-05	0.00013	-0.00017	1e-05		3.6e-09	1e-10	2.5e-09	2.25e-08	6.4e-09	1.69e-08	2.89e-08	1e-10
0.4	0.00014	0.00011	5e-05	5e-05	3e-05	3e-05	-2e-05	1e-05		0	0	0	0	0	0	0	0		0.00014	0.00011	5e-05	5e-05	3e-05	3e-05	-2e-05	1e-05		1.96e-08	1.21e-08	2.5e-09	2.5e-09	9e-10	9e-10	4e-10	1e-10
0.6	-1e-05	-9e-05	-0.0001	-5e-05	-7e-05	8e-05	-2e-05	-4e-05		0	0	0	0	0	0	0	0		-1e-05	-9e-05	-0.0001	-5e-05	-7e-05	8e-05	-2e-05	-4e-05		1e-10	8.1e-09	1e-08	2.5e-09	4.9e-09	6.4e-09	4e-10	1.6e-09
0.8	-0.00016	-4e-05	5e-05	-5e-05	-0.00012	8e-05	-2e-05	6e-05		0	0	0	0	0	0	0	0		-0.00016	-4e-05	5e-05	-5e-05	-0.00012	8e-05	-2e-05	6e-05		2.56e-08	1.6e-09	2.5e-09	2.5e-09	1.44e-08	6.4e-09	4e-10	3.6e-09
1	4e-05	1e-05	0.00015	-0.00015	-0.00017	0.00018	-7e-05	1e-05		0	0	0	0	0	0	0	0		4e-05	1e-05	0.00015	-0.00015	-0.00017	0.00018	-7e-05	1e-05		1.6e-09	1e-10	2.25e-08	2.25e-08	2.89e-08	3.24e-08	4.9e-09	1e-10
1.2	-6e-05	0.00011	-0.0001	0.0002	0.00013	8e-05	-2e-05	-4e-05		0	0	0	0	0	0	0	0		-6e-05	0.00011	-0.0001	0.0002	0.00013	8e-05	-2e-05	-4e-05		3.6e-09	1.21e-08	1e-08	4e-08	1.69e-08	6.4e-09	4e-10	1.6e-09
1.4	0.00039	-9e-05	0.00015	0	0.00013	0.00033	-7e-05	-4e-05		0	0	0	0	0	0	0	0		0.00039	-9e-05	0.00015	0	0.00013	0.00033	-7e-05	-4e-05		1.521e-07	8.1e-09	2.25e-08	0	1.69e-08	1.089e-07	4.9e-09	1.6e-09
1.6	-6e-05	1e-05	5e-05	-5e-05	8e-05	3e-05	-2e-05	-4e-05		0	0	0	0	0	0	0	0		-6e-05	1e-05	5e-05	-5e-05	8e-05	3e-05	-2e-05	-4e-05		3.6e-09	1e-10	2.5e-09	2.5e-09	6.4e-09	9e-10	4e-10	1.6e-09
1.8	-0.00016	1e-05	0.0001	-5e-05	-2e-05	-2e-05	3e-05	-4e-05		0	0	0	0	0	0	0	0		-0.00016	1e-05	0.0001	-5e-05	-2e-05	-2e-05	3e-05	-4e-05		2.56e-08	1e-10	1e-08	2.5e-09	4e-10	4e-10	9e-10	1.6e-09
2	9e-05	0.00011	0	-0.00015	-2e-05	-7e-05	3e-05	1e-05		0	0	0	0	0	0	0	0		9e-05	0.00011	0	-0.00015	-2e-05	-7e-05	3e-05	1e-05		8.1e-09	1.21e-08	0	2.25e-08	4e-10	4.9e-09	9e-10	1e-10
2.2	-1e-05	-0.00014	0	0.00015	8e-05	-0.00017	3e-05	6e-05		0	0	0	0	0	0	0	0		-1e-05	-0.00014	0	0.00015	8e-05	-0.00017	3e-05	6e-05		1e-10	1.96e-08	0	2.25e-08	6.4e-09	2.89e-08	9e-10	3.6e-09
2.4	9e-05	1e-05	-0.00015	0	-2e-05	-7e-05	8e-05	6e-05		0	0	0	0	0	0	0	0		9e-05	1e-05	-0.00015	0	-2e-05	-7e-05	8e-05	6e-05		8.1e-09	1e-10	2.25e-08	0	4e-10	4.9e-09	6.4e-09	3.6e-09
2.6	-6e-05	1e-05	5e-05	0	-7e-05	-0.00022	8e-05	0.00011		0	0	0	0	0	0	0	0		-6e-05	1e-05	5e-05	0	-7e-05	-0.00022	8e-05	0.00011		3.6e-09	1e-10	2.5e-09	0	4.9e-09	4.84e-08	6.4e-09	1.21e-08
2.8	-0.00016	0.00011	-0.0001	-5e-05	-0.00012	-0.00012	0.00013	0.00011		0	0	0	0	0	0	0	0		-0.00016	0.00011	-0.0001	-5e-05	-0.00012	-0.00012	0.00013	0.00011		2.56e-08	1.21e-08	1e-08	2.5e-09	1.44e-08	1.44e-08	1.69e-08	1.21e-08
3	4e-05	-9e-05	0	-0.00015	-0.00012	-0.00017	0.00013	0.00011		0	0	0	0	0	0	0	0		4e-05	-9e-05	0	-0.00015	-0.00012	-0.00017	0.00013	0.00011		1.6e-09	8.1e-09	0	2.25e-08	1.44e-08	2.89e-08	1.69e-08	1.21e-08
3.2	-1e-05	-4e-05	-0.0001	0.00015	0.00023	-7e-05	0.00028	0.00011		0	0	0	0	0	0	0	0		-1e-05	-4e-05	-0.0001	0.00015	0.00023	-7e-05	0.00028	0.00011		1e-10	1.6e-09	1e-08	2.25e-08	5.29e-08	4.9e-09	7.84e-08	1.21e-08
3.4	-0.00011	-4e-05	0.0001	0	0.00013	-0.00017	3e-05	0.00036		0	0	0	0	0	0	0	0		-0.00011	-4e-05	0.0001	0	0.00013	-0.00017	3e-05	0.00036		1.21e-08	1.6e-09	1e-08	0	1.69e-08	2.89e-08	9e-10	1.296e-07
3.6	-6e-05	0.00011	0.0001	0	-2e-05	-7e-05	-0.00012	0.00011		0	0	0	0	0	0	0	0		-6e-05	0.00011	0.0001	0	-2e-05	-7e-05	-0.00012	0.00011		3.6e-09	1.21e-08	1e-08	0	4e-10	4.9e-09	1.44e-08	1.21e-08
3.8	-0.00011	-9e-05	0	-0.0001	-2e-05	-0.00017	-0.00012	1e-05		0	0	0	0	0	0	0	0		-0.00011	-9e-05	0	-0.0001	-2e-05	-0.00017	-0.00012	1e-05		1.21e-08	8.1e-09	0	1e-08	4e-10	2.89e-08	1.44e-08	1e-10
4	9e-05	6e-05	0.0003	-0.0002	-2e-05	-7e-05	-0.00022	-9e-05		0	0	0	0	0	0	0	0		9e-05	6e-05	0.0003	-0.0002	-2e-05	-7e-05	-0.00022	-9e-05		8.1e-09	3.6e-09	9e-08	4e-08	4e-10	4.9e-09	4.84e-08	8.1e-09
4.2	-6e-05	1e-05	-5e-05	0.0001	3e-05	-0.00017	-0.00012	-0.00014		0	0	0	0	0	0	0	0		-6e-05	1e-05	-5e-05	0.0001	3e-05	-0.00017	-0.00012	-0.00014		3.6e-09	1e-10	2.5e-09	1e-08	9e-10	2.89e-08	1.44e-08	1.96e-08
4.4	-0.00016	0.00011	0.00015	0	-2e-05	3e-05	-0.00012	-0.00014		0	0	0	0	0	0	0	0		-0.00016	0.00011	0.00015	0	-2e-05	3e-05	-0.00012	-0.00014		2.56e-08	1.21e-08	2.25e-08	0	4e-10	9e-10	1.44e-08	1.96e-08
4.6	-6e-05	-0.00014	-5e-05	-0.0001	-7e-05	-0.00012	-7e-05	-0.00014		0	0	0	0	0	0	0	0		-6e-05	-0.00014	-5e-05	-0.0001	-7e-05	-0.00012	-7e-05	-0.00014		3.6e-09	1.96e-08	2.5e-09	1e-08	4.9e-09	1.44e-08	4.9e-09	1.96e-08
4.8	-0.00011	1e-05	0.0001	-0.0001	-0.00017	3e-05	-0.00012	-0.00014		0	0	0	0	0	0	0	0		-0.00011	1e-05	0.0001	-0.0001	-0.00017	3e-05	-0.00012	-0.00014		1.21e-08	1e-10	1e-08	1e-08	2.89e-08	9e-10	1.44e-08	1.96e-08
5	9e-05	1e-05	-0.0001	-0.0002	-7e-05	-7e-05	-0.00012	-0.00014		0	0	0	0	0	0	0	0		9e-05	1e-05	-0.0001	-0.0002	-7e-05	-7e-05	-0.00012	-0.00014		8.1e-09	1e-10	1e-08	4e-08	4.9e-09	4.9e-09	1.44e-08	1.96e-08
5.2	-1e-05	0.00016	5e-05	0.0001	0.00013	3e-05	-7e-05	-9e-05		0	0	0	0	0	0	0	0		-1e-05	0.00016	5e-05	0.0001	0.00013	3e-05	-7e-05	-9e-05		1e-10	2.56e-08	2.5e-09	1e-08	1.69e-08	9e-10	4.9e-09	8.1e-09
5.4	-0.00021	-0.00014	-0.0001	-5e-05	0.00013	-7e-05	-2e-05	-9e-05		0	0	0	0	0	0	0	0		-0.00021	-0.00014	-0.0001	-5e-05	0.00013	-7e-05	-2e-05	-9e-05		4.41e-08	1.96e-08	1e-08	2.5e-09	1.69e-08	4.9e-09	4e-10	8.1e-09
5.6	-1e-05	1e-05	0	0	3e-05	8e-05	-2e-05	-4e-05		0	0	0	0	0	0	0	0		-1e-05	1e-05	0	0	3e-05	8e-05	-2e-05	-4e-05		1e-10	1e-10	0	0	9e-10	6.4e-09	4e-10	1.6e-09
5.8	-6e-05	1e-05	-0.00015	-0.0001	-2e-05	-2e-05	3e-05	-4e-05		0	0	0	0	0	0	0	0		-6e-05	1e-05	-0.00015	-0.0001	-2e-05	-2e-05	3e-05	-4e-05		3.6e-09	1e-10	2.25e-08	1e-08	4e-10	4e-10	9e-10	1.6e-09
6	9e-05	0.00011	5e-05	-0.00015	-2e-05	0.00028	-2e-05	1e-05		0	0	0	0	0	0	0	0		9e-05	0.00011	5e-05	-0.00015	-2e-05	0.00028	-2e-05	1e-05		8.1e-09	1.21e-08	2.5e-09	2.25e-08	4e-10	7.84e-08	4e-10	1e-10
6.2	4e-05	-9e-05	5e-05	5e-05	3e-05	-7e-05	-7e-05	-4e-05		0	0	0	0	0	0	0	0		4e-05	-9e-05	5e-05	5e-05	3e-05	-7e-05	-7e-05	-4e-05		1.6e-09	8.1e-09	2.5e-09	2.5e-09	9e-10	4.9e-09	4.9e-09	1.6e-09
6.4	-0.00016	1e-05	0.0001	-5e-05	-7e-05	-2e-05	3e-05	-9e-05		0	0	0	0	0	0	0	0		-0.00016	1e-05	0.0001	-5e-05	-7e-05	-2e-05	3e-05	-9e-05		2.56e-08	1e-10	1e-08	2.5e-09	4.9e-09	4e-10	9e-10	8.1e-09
6.6	4e-05	1e-05	0.00035	0	-7e-05	-7e-05	-7e-05	6e-05		0	0	0	0	0	0	0	0		4e-05	1e-05	0.00035	0	-7e-05	-7e-05	-7e-05	6e-05		1.6e-09	1e-10	1.225e-07	0	4.9e-09	4.9e-09	4.9e-09	3.6e-09
6.8	-0.00011	0.00011	0	-0.0001	-0.00012	-0.00022	-7e-05	-4e-05		0	0	0	0	0	0	0	0		-0.00011	0.00011	0	-0.0001	-0.00012	-0.00022	-7e-05	-4e-05		1.21e-08	1.21e-08	0	1e-08	1.44e-08	4.84e-08	4.9e-09	1.6e-09
7	9e-05	-9e-05	0.00015	-5e-05	-2e-05	-0.00017	-7e-05	-4e-05		0	0	0	0	0	0	0	0		9e-05	-9e-05	0.00015	-5e-05	-2e-05	-0.00017	-7e-05	-4e-05		8.1e-09	8.1e-09	2.25e-08	2.5e-09	4e-10	2.89e-08	4.9e-09	1.6e-09
7.2	-6e-05	1e-05	0	5e-05	0.00013	-0.00022	-7e-05	1e-05		0	0	0	0	0	0	0	0		-6e-05	1e-05	0	5e-05	0.00013	-0.00022	-7e-05	1e-05		3.6e-09	1e-10	0	2.5e-09	1.69e-08	4.84e-08	4.9e-09	1e-10
7.4	-0.00016	1e-05	5e-05	-5e-05	8e-05	-0.00012	-2e-05	-4e-05		0	0	0	0	0	0	0	0		-0.00016	1e-05	5e-05	-5e-05	8e-05	-0.00012	-2e-05	-4e-05		2.56e-08	1e-10	2.5e-09	2.5e-09	6.4e-09	1.44e-08	4e-10	1.6e-09
7.6	-1e-05	0.00016	-0.0001	0	3e-05	-0.00022	-2e-05	1e-05		0	0	0	0	0	0	0	0		-1e-05	0.00016	-0.0001	0	3e-05	-0.00022	-2e-05	1e-05		1e-10	2.56e-08	1e-08	0	9e-10	4.84e-08	4e-10	1e-10
7.8	-0.00011	-9e-05	5e-05	-0.00015	-2e-05	-7e-05	-2e-05	1e-05		0	0	0	0	0	0	0	0		-0.00011	-9e-05	5e-05	-0.00015	-2e-05	-7e-05	-2e-05	1e-05		1.21e-08	8.1e-09	2.5e-09	2.25e-08	4e-10	4.9e-09	4e-10	1e-10
8	0.00029	1e-05	-0.00015	0.00015	3e-05	-0.00022	-2e-05	1e-05		0	0	0	0	0	0	0	0		0.00029	1e-05	-0.00015	0.00015	3e-05	-0.00022	-2e-05	1e-05		8.41e-08	1e-10	2.25e-08	2.25e-08	9e-10	4.84e-08	4e-10	1e-10
8.2	-0.00011	1e-05	0	0.0001	-2e-05	-7e-05	3e-05	1e-05		0	0	0	0	0	0	0	0		-0.00011	1e-05	0	0.0001	-2e-05	-7e-05	3e-05	1e-05		1.21e-08	1e-10	0	1e-08	4e-10	4.9e-09	9e-10	1e-10
8.4	-0.00016	0.00021	-0.0002	-5e-05	-2e-05	-0.00022	3e-05	6e-05		0	0	0	0	0	0	0	0		-0.00016	0.00021	-0.0002	-5e-05	-2e-05	-0.00022	3e-05	6e-05		2.56e-08	4.41e-08	4e-08	2.5e-09	4e-10	4.84e-08	9e-10	3.6e-09
8.6	-1e-05	-0.00014	5e-05	-5e-05	-0.00012	3e-05	8e-05	0.00011		0	0	0	0	0	0	0	0		-1e-05	-0.00014	5e-05	-5e-05	-0.00012	3e-05	8e-05	0.00011		1e-10	1.96e-08	2.5e-09	2.5e-09	1.44e-08	9e-10	6.4e-09	1.21e-08
8.8	-6e-05	-4e-05	-5e-05	-0.00015	-0.00017	-0.00017	8e-05	6e-05		0	0	0	0	0	0	0	0		-6e-05	-4e-05	-5e-05	-0.00015	-0.00017	-0.00017	8e-05	6e-05		3.6e-09	1.6e-09	2.5e-09	2.25e-08	2.89e-08	2.89e-08	6.4e-09	3.6e-09
9	4e-05	1e-05	5e-05	0.00025	3e-05	-2e-05	0.00028	0.00011		0	0	0	0	0	0	0	0		4e-05	1e-05	5e-05	0.00025	3e-05	-2e-05	0.00028	0.00011		1.6e-09	1e-10	2.5e-09	6.25e-08	9e-10	4e-10	7.84e-08	1.21e-08
9.2	-0.00011	0.00031	0.00035	5e-05	8e-05	-0.00012	3e-05	0.00016		0	0	0	0	0	0	0	0		-0.00011	0.00031	0.00035	5e-05	8e-05	-0.00012	3e-05	0.00016		1.21e-08	9.61e-08	1.225e-07	2.5e-09	6.4e-09	1.44e-08	9e-10	2.56e-08
9.4	-0.00016	-0.00014	-5e-05	-5e-05	3e-05	-2e-05	-7e-05	0.00016		0	0	0	0	0	0	0	0		-0.00016	-0.00014	-5e-05	-5e-05	3e-05	-2e-05	-7e-05	0.00016		2.56e-08	1.96e-08	2.5e-09	2.5e-09	9e-10	4e-10	4.9e-09	2.56e-08
9.6	4e-05	-0.00024	0.0001	-5e-05	-2e-05	-0.00012	-0.00017	6e-05		0	0	0	0	0	0	0	0		4e-05	-0.00024	0.0001	-5e-05	-2e-05	-0.00012	-0.00017	6e-05		1.6e-09	5.76e-08	1e-08	2.5e-09	4e-10	1.44e-08	2.89e-08	3.6e-09
9.8	-1e-05	1e-05	-5e-05	-0.00015	-7e-05	8e-05	-0.00012	-0.00014		0	0	0	0	0	0	0	0		-1e-05	1e-05	-5e-05	-0.00015	-7e-05	8e-05	-0.00012	-0.00014		1e-10	1e-10	2.5e-09	2.25e-08	4.9e-09	6.4e-09	1.44e-08	1.96e-08
10	-0.00011	0.00041	0	0.0001	3e-05	-7e-05	-0.00017	-0.00019		0	0	0	0	0	0	0	0		-0.00011	0.00041	0	0.0001	3e-05	-7e-05	-0.00017	-0.00019		1.21e-08	1.681e-07	0	1e-08	9e-10	4.9e-09	2.89e-08	3.61e-08
10.2	-0.00011	-4e-05	-0.0001	-5e-05	-2e-05	0.00023	-0.00017	-0.00019		0	0	0	0	0	0	0	0		-0.00011	-4e-05	-0.0001	-5e-05	-2e-05	0.00023	-0.00017	-0.00019		1.21e-08	1.6e-09	1e-08	2.5e-09	4e-10	5.29e-08	2.89e-08	3.61e-08
10.4	-0.00016	-0.00024	5e-05	-5e-05	-2e-05	-0.00012	-0.00017	-0.00014		0	0	0	0	0	0	0	0		-0.00016	-0.00024	5e-05	-5e-05	-2e-05	-0.00012	-0.00017	-0.00014		2.56e-08	5.76e-08	2.5e-09	2.5e-09	4e-10	1.44e-08	2.89e-08	1.96e-08
10.6	4e-05	1e-05	-0.00015	-5e-05	-0.00012	-0.00012	-0.00012	-0.00019		0	0	0	0	0	0	0	0		4e-05	1e-05	-0.00015	-5e-05	-0.00012	-0.00012	-0.00012	-0.00019		1.6e-09	1e-10	2.25e-08	2.5e-09	1.44e-08	1.44e-08	1.44e-08	3.61e-08
10.8	-6e-05	0.00066	-5e-05	-0.0002	-0.00017	-0.00017	-0.00012	-0.00014		0	0	0	0	0	0	0	0		-6e-05	0.00066	-5e-05	-0.0002	-0.00017	-0.00017	-0.00012	-0.00014		3.6e-09	4.356e-07	2.5e-09	4e-08	2.89e-08	2.89e-08	1.44e-08	1.96e-08
11	-0.00016	0.01081	-0.00015	0.0001	0.00013	-0.00027	-7e-05	-0.00014		0	0	0	0	0	0	0	0		-0.00016	0.01081	-0.00015	0.0001	0.00013	-0.00027	-7e-05	-0.00014		2.56e-08	0.000116856	2.25e-08	1e-08	1.69e-08	7.29e-08	4.9e-09	1.96e-08
11.2	0.00204	0.01051	5e-05	0	8e-05	-0.00012	-7e-05	-9e-05		0	0	0	0	0	0	0	0		0.00204	0.01051	5e-05	0	8e-05	-0.00012	-7e-05	-9e-05		4.1616e-06	0.00011046	2.5e-09	0	6.4e-09	1.44e-08	4.9e-09	8.1e-09
11.4	0.00929	0.01211	0.00365	0	3e-05	-0.00032	-7e-05	-9e-05		0	0	0	0	0	0	0	0		0.00929	0.01211	0.00365	0	3e-05	-0.00032	-7e-05	-9e-05		8.63041e-05	0.000146652	1.33225e-05	0	9e-10	1.024e-07	4.9e-09	8.1e-09
11.6	0.01154	0.01786	0.01275	-0.0001	3e-05	-0.00017	-2e-05	-4e-05		0	0.034	0	0	0	0	0	0		0.01154	-0.01614	0.01275	-0.0001	3e-05	-0.00017	-2e-05	-4e-05		0.000133172	0.0002605	0.000162562	1e-08	9e-10	2.89e-08	4e-10	1.6e-09
11.8	0.01224	0.02656	0.01795	-0.0002	-0.00012	-0.00027	-2e-05	-4e-05		0.0365	0.0314	0	0	0	0	0	0		-0.02426	-0.00484	0.01795	-0.0002	-0.00012	-0.00027	-2e-05	-4e-05		0.000588548	2.34256e-05	0.000322203	4e-08	1.44e-08	7.29e-08	4e-10	1.6e-09
12	0.01389	0.03236	0.0167	0.0028	-0.00012	-0.00017	-0.00017	-4e-05		0.0358	0.0292	0.039	0	0	0	0	0		-0.02191	0.00316	-0.0223	0.0028	-0.00012	-0.00017	-0.00017	-4e-05		0.000480048	9.9856e-06	0.00049729	7.84e-06	1.44e-08	2.89e-08	2.89e-08	1.6e-09
12.2	0.01684	0.03216	0.01835	0.00595	-7e-05	-0.00022	-2e-05	-0.00019		0.0331	0.0282	0.0385	0	0	0	0	0		-0.01626	0.00396	-0.02015	0.00595	-7e-05	-0.00022	-2e-05	-0.00019		0.000264388	1.56816e-05	0.000406022	3.54025e-05	4.9e-09	4.84e-08	4e-10	3.61e-08
12.4	0.01794	0.03646	0.0221	0.00635	0.00508	0.00563	-7e-05	1e-05		0.0326	0.023	0.041	0	0	0	0	0		-0.01466	0.01346	-0.0189	0.00635	0.00508	0.00563	-7e-05	1e-05		0.000214916	0.000181172	0.00035721	4.03225e-05	2.58064e-05	3.16969e-05	4.9e-09	1e-10
12.6	0.01994	0.03596	0.0244	0.0134	0.00718	0.01163	-7e-05	1e-05		0.0326	0.0214	0.0416	0.0272	0	0	0	0		-0.01266	0.01456	-0.0172	-0.0138	0.00718	0.01163	-7e-05	1e-05		0.000160276	0.000211994	0.00029584	0.00019044	5.15524e-05	0.000135257	4.9e-09	1e-10
12.8	0.02579	0.04336	0.0287	0.01565	0.00888	0.01123	-7e-05	-4e-05		0.0338	0	0.0426	0.0288	0	0.0305	0	0		-0.00801	0.04336	-0.0139	-0.01315	0.00888	-0.01927	-7e-05	-4e-05		6.41601e-05	0.00188009	0.00019321	0.000172922	7.88544e-05	0.000371333	4.9e-09	1.6e-09
13	0.03714	0.05026	0.03785	0.01655	0.00933	0.02568	0.00263	-4e-05		0.0332	0.0214	0.0427	0.03	0.0263	0.0348	0	0		0.00394	0.02886	-0.00485	-0.01345	-0.01697	-0.00912	0.00263	-4e-05		1.55236e-05	0.0008329	2.35225e-05	0.000180902	0.000287981	8.31744e-05	6.9169e-06	1.6e-09
13.2	0.04459	0.05761	0.0466	0.01715	0.00873	0.03688	0.00498	-4e-05		0.0344	0.026	0.044	0.0308	0.0282	0.0395	0.0229	0		0.01019	0.03161	0.0026	-0.01365	-0.01947	-0.00262	-0.01792	-4e-05		0.000103836	0.000999192	6.76e-06	0.000186323	0.000379081	6.8644e-06	0.000321126	1.6e-09
13.4	0.04989	0.06971	0.0498	0.02405	0.01243	0.03593	0.00293	-4e-05		0.044	0.0264	0.0433	0.0323	0.0309	0.0417	0.0254	0		0.00589	0.04331	0.0065	-0.00825	-0.01847	-0.00577	-0.02247	-4e-05		3.46921e-05	0.00187576	4.225e-05	6.80625e-05	0.000341141	3.32929e-05	0.000504901	1.6e-09
13.6	0.06959	0.07761	0.0514	0.02615	0.01448	0.03508	0.00383	0.00116		0.049	0.0285	0.043	0.0321	0.0345	0.0438	0.0258	0		0.02059	0.04911	0.0084	-0.00595	-0.02002	-0.00872	-0.02197	0.00116		0.000423948	0.00241179	7.056e-05	3.54025e-05	0.0004008	7.60384e-05	0.000482681	1.3456e-06
13.8	0.07604	0.09786	0.0611	0.0335	0.01423	0.03808	0.00793	0.00371		0.0497	0.0266	0.0463	0.0318	0.0349	0.0435	0.0273	0.0196		0.02634	0.07126	0.0148	0.0017	-0.02067	-0.00542	-0.01937	-0.01589		0.000693796	0.00507799	0.00021904	2.89e-06	0.000427249	2.93764e-05	0.000375197	0.000252492
14	0.07349	0.09986	0.0654	0.03585	0.01748	0.04083	0.01478	0.00296		0.0506	0.0293	0.0477	0.0337	0.0446	0.0437	0.0267	0.0213		0.02289	0.07056	0.0177	0.00215	-0.02712	-0.00287	-0.01192	-0.01834		0.000523952	0.00497871	0.00031329	4.6225e-06	0.000735494	8.2369e-06	0.000142086	0.000336356
14.2	0.07234	0.09626	0.0739	0.0494	0.01353	0.03683	0.01713	0.00521		0.0498	0.0289	0.0478	0.0352	0.0409	0.0491	0.0285	0.0227		0.02254	0.06736	0.0261	0.0142	-0.02737	-0.01227	-0.01137	-0.01749		0.000508052	0.00453737	0.00068121	0.00020164	0.000749117	0.000150553	0.000129277	0.0003059
14.4	0.07174	0.07411	0.0755	0.05075	0.01613	0.03723	0.01978	0.01086		0.0505	0.0295	0.0483	0.0353	0.0412	0.0467	0.0366	0.0293		0.02124	0.04461	0.0272	0.01545	-0.02507	-0.00947	-0.01682	-0.01844		0.000451138	0.00199005	0.00073984	0.000238703	0.000628505	8.96809e-05	0.000282912	0.000340034
14.6	0.06834	0.06826	0.077	0.0545	0.02118	0.03538	0.02338	0.01176		0.0505	0.0288	0.0487	0.0365	0.0405	0.0485	0.0354	0.0286		0.01784	0.03946	0.0283	0.018	-0.01932	-0.01312	-0.01202	-0.01684		0.000318266	0.00155709	0.00080089	0.000324	0.000373262	0.000172134	0.00014448	0.000283586
14.8	0.06979	0.06686	0.071	0.05585	0.02933	0.04408	0.01983	0.00971		0.0505	0.0284	0.0493	0.0369	0.041	0.0512	0.0373	0.0312		0.01929	0.03846	0.0217	0.01895	-0.01167	-0.00712	-0.01747	-0.02149		0.000372104	0.00147917	0.00047089	0.000359102	0.000136189	5.06944e-05	0.000305201	0.00046182
15	0.06729	0.05431	0.0706	0.05295	0.02458	0.04708	0.02123	0.00966		0.0506	0.0307	0.0486	0.0377	0.0412	0.0518	0.0402	0.0315		0.01669	0.02361	0.022	0.01525	-0.01662	-0.00472	-0.01897	-0.02184		0.000278556	0.000557432	0.000484	0.000232562	0.000276224	2.22784e-05	0.000359861	0.000476986
15.2	0.05639	0.06126	0.0714	0.05065	0.02568	0.04873	0.02823	0.01201		0.0509	0.0334	0.0493	0.0375	0.0415	0.0516	0.0438	0.0342		0.00549	0.02786	0.0221	0.01315	-0.01582	-0.00287	-0.01557	-0.02219		3.01401e-05	0.00077618	0.00048841	0.000172923	0.000250272	8.2369e-06	0.000242425	0.000492396
15.4	0.05179	0.05901	0.07695	0.0519	0.02878	0.04558	0.02578	0.01696		0.0523	0.0371	0.0494	0.0381	0.0416	0.051	0.0437	0.0351		-0.00051	0.02191	0.02755	0.0138	-0.01282	-0.00542	-0.01792	-0.01814		2.601e-07	0.000480048	0.000759003	0.00019044	0.000164352	2.93764e-05	0.000321126	0.00032906
15.6	0.04294	0.05846	0.07595	0.06815	0.03343	0.04438	0.02938	0.01666		0.0524	0.0415	0.0499	0.0397	0.0422	0.0528	0.0437	0.037		-0.00946	0.01696	0.02605	0.02845	-0.00877	-0.00842	-0.01432	-0.02034		8.94916e-05	0.000287642	0.000678603	0.000809403	7.69129e-05	7.08964e-05	0.000205062	0.000413716
15.8	0.05719	0.06526	0.0763	0.06585	0.03823	0.04713	0.02868	0.01861		0.0536	0.0474	0.0517	0.0398	0.0434	0.0519	0.0453	0.0378		0.00359	0.01786	0.0246	0.02605	-0.00517	-0.00477	-0.01662	-0.01919		1.28881e-05	0.00031898	0.00060516	0.000678603	2.67289e-05	2.27529e-05	0.000276224	0.000368256
16	0.05904	0.06071	0.0817	0.0582	0.03218	0.05343	0.03658	0.01636		0.0527	0.0523	0.0513	0.0419	0.0433	0.0529	0.0462	0.0386		0.00634	0.00841	0.0304	0.0163	-0.01112	0.00053	-0.00962	-0.02224		4.01956e-05	7.07281e-05	0.00092416	0.00026569	0.000123654	2.809e-07	9.25444e-05	0.000494618
16.2	0.06914	0.06146	0.0814	0.06375	0.02833	0.05068	0.03503	0.02056		0.0528	0.056	0.0539	0.0442	0.0438	0.0545	0.047	0.0399		0.01634	0.00546	0.0275	0.01955	-0.01547	-0.00382	-0.01197	-0.01934		0.000266996	2.98116e-05	0.00075625	0.000382202	0.000239321	1.45924e-05	0.000143281	0.000374036
16.4	0.06989	0.07661	0.0782	0.05895	0.03993	0.05153	0.03643	0.01381		0.0529	0.059	0.0544	0.0468	0.0444	0.0543	0.0482	0.0393		0.01699	0.01761	0.0238	0.01215	-0.00447	-0.00277	-0.01177	-0.02549		0.00028866	0.000310112	0.00056644	0.000147623	1.99809e-05	7.6729e-06	0.000138533	0.00064974
16.6	0.07379	0.06681	0.082	0.0592	0.04083	0.05138	0.03693	0.01701		0.0536	0.0593	0.0559	0.048	0.0442	0.0551	0.0473	0.0402		0.02019	0.00751	0.0261	0.0112	-0.00337	-0.00372	-0.01037	-0.02319		0.000407636	5.64001e-05	0.00068121	0.00012544	1.13569e-05	1.38384e-05	0.000107537	0.000537776
16.8	0.07604	0.08126	0.07955	0.06915	0.04373	0.05268	0.03763	0.02261		0.0549	0.0584	0.0564	0.0481	0.0446	0.0551	0.0478	0.0411		0.02114	0.02286	0.02315	0.02105	-0.00087	-0.00242	-0.01017	-0.01849		0.0004469	0.00052258	0.000535922	0.000443103	7.569e-07	5.8564e-06	0.000103429	0.00034188
17	0.07794	0.07866	0.0755	0.06865	0.04203	0.05548	0.04463	0.02211		0.0541	0.0605	0.0566	0.0492	0.0452	0.0558	0.0481	0.0413		0.02384	0.01816	0.0189	0.01945	-0.00317	-0.00032	-0.00347	-0.01919		0.000568346	0.000329786	0.00035721	0.000378303	1.00489e-05	1.024e-07	1.20409e-05	0.000368256
17.2	0.07469	0.07716	0.08105	0.06565	0.03713	0.05258	0.04333	0.01911		0.0535	0.0594	0.0579	0.0497	0.0463	0.0559	0.0488	0.0422		0.02119	0.01776	0.02315	0.01595	-0.00917	-0.00332	-0.00547	-0.02309		0.000449016	0.000315418	0.000535922	0.000254402	8.40889e-05	1.10224e-05	2.99209e-05	0.000533148
17.4	0.07719	0.07941	0.082	0.06695	0.04623	0.05003	0.04313	0.01546		0.0544	0.0573	0.0584	0.0503	0.0468	0.0559	0.0496	0.0427		0.02279	0.02211	0.0236	0.01665	-0.00057	-0.00587	-0.00647	-0.02724		0.000519384	0.000488852	0.00055696	0.000277222	3.249e-07	3.44569e-05	4.18609e-05	0.000742018
17.6	0.07644	0.08206	0.08045	0.06735	0.04683	0.05058	0.04453	0.02236		0.0528	0.0577	0.0586	0.0511	0.0468	0.0569	0.049	0.0436		0.02364	0.02436	0.02185	0.01625	3e-05	-0.00632	-0.00447	-0.02124		0.00055885	0.00059341	0.000477422	0.000264062	9e-10	3.99424e-05	1.99809e-05	0.000451138
17.8	0.07539	0.08211	0.07425	0.06775	0.04773	0.05263	0.04663	0.02091		0.0517	0.0599	0.0575	0.0504	0.0469	0.0564	0.0501	0.0439		0.02369	0.02221	0.01675	0.01735	0.00083	-0.00377	-0.00347	-0.02299		0.000561216	0.000493284	0.000280562	0.000301023	6.889e-07	1.42129e-05	1.20409e-05	0.00052854
18	0.07459	0.07896	0.0725	0.0722	0.04173	0.05813	0.04513	0.01526		0.0527	0.0584	0.0575	0.0489	0.0464	0.0559	0.0495	0.0431		0.02189	0.02056	0.015	0.0233	-0.00467	0.00223	-0.00437	-0.02784		0.000479172	0.000422714	0.000225	0.00054289	2.18089e-05	4.9729e-06	1.90969e-05	0.000775066
18.2	0.07589	0.07516	0.0737	0.06995	0.04483	0.06038	0.04253	0.01886		0.0534	0.0584	0.0569	0.0479	0.0454	0.0545	0.0488	0.0435		0.02249	0.01676	0.0168	0.02205	-0.00057	0.00588	-0.00627	-0.02464		0.0005058	0.000280898	0.00028224	0.000486202	3.249e-07	3.45744e-05	3.93129e-05	0.00060713
18.4	0.07639	0.07616	0.07315	0.06665	0.04868	0.05143	0.04403	0.01781		0.0523	0.0567	0.0558	0.0488	0.0455	0.0548	0.0479	0.0431		0.02409	0.01946	0.01735	0.01785	0.00318	-0.00337	-0.00387	-0.02529		0.000580328	0.000378692	0.000301023	0.000318622	1.01124e-05	1.13569e-05	1.49769e-05	0.000639584
18.6	0.07719	0.07821	0.0766	0.0661	0.04678	0.05363	0.05088	0.01821		0.0524	0.0573	0.0559	0.0487	0.0459	0.0538	0.0488	0.0433		0.02479	0.02091	0.0207	0.0174	0.00088	-0.00017	0.00208	-0.02509		0.000614544	0.000437228	0.00042849	0.00030276	7.744e-07	2.89e-08	4.3264e-06	0.000629508
18.8	0.07559	0.07751	0.07355	0.0696	0.04058	0.05628	0.04728	0.02026		0.051	0.0558	0.0558	0.0484	0.0454	0.0544	0.049	0.0429		0.02459	0.02171	0.01775	0.0212	-0.00482	0.00188	-0.00172	-0.02264		0.000604668	0.000471324	0.000315063	0.00044944	2.32324e-05	3.5344e-06	2.9584e-06	0.00051257
19	0.07604	0.07886	0.075	0.066	0.04123	0.05663	0.04368	0.01861		0.0512	0.055	0.0566	0.0479	0.0447	0.0541	0.0483	0.0432		0.02484	0.02386	0.0184	0.0181	-0.00347	0.00253	-0.00462	-0.02459		0.000617026	0.0005693	0.00033856	0.00032761	1.20409e-05	6.4009e-06	2.13444e-05	0.000604668
19.2	0.07449	0.07701	0.07315	0.0656	0.04068	0.05543	0.04853	0.01326		0.0505	0.0546	0.0554	0.0478	0.0444	0.0538	0.0479	0.0426		0.02399	0.02241	0.01775	0.0178	-0.00372	0.00163	0.00063	-0.02934		0.00057552	0.000502208	0.000315063	0.00031684	1.38384e-05	2.6569e-06	3.969e-07	0.000860836
19.4	0.07524	0.08196	0.06975	0.06485	0.04548	0.04843	0.04173	0.01371		0.0496	0.053	0.0542	0.0475	0.0438	0.0538	0.0478	0.0428		0.02564	0.02896	0.01555	0.01735	0.00168	-0.00537	-0.00607	-0.02909		0.00065741	0.000838682	0.000241803	0.000301023	2.8224e-06	2.88369e-05	3.68449e-05	0.000846228
19.6	0.07454	0.08271	0.0712	0.07045	0.04978	0.04818	0.04498	0.01971		0.0492	0.0526	0.0539	0.0465	0.0436	0.053	0.0478	0.042		0.02534	0.03011	0.0173	0.02395	0.00618	-0.00482	-0.00282	-0.02229		0.000642116	0.000906612	0.00029929	0.000573602	3.81924e-05	2.32324e-05	7.9524e-06	0.000496844
19.8	0.07154	0.07421	0.07345	0.0698	0.04628	0.05408	0.04433	0.02181		0.0487	0.0524	0.0531	0.0459	0.0433	0.0522	0.0468	0.0416		0.02284	0.02181	0.02035	0.0239	0.00298	0.00188	-0.00247	-0.01979		0.000521666	0.000475676	0.000414123	0.00057121	8.8804e-06	3.5344e-06	6.1009e-06	0.000391644
20	0.07534	0.07441	0.0734	0.0655	0.04163	0.05608	0.04308	0.01561		0.0483	0.051	0.0525	0.0459	0.0431	0.0513	0.0463	0.0417		0.02704	0.02341	0.0209	0.0196	-0.00147	0.00478	-0.00322	-0.02609		0.000731162	0.000548028	0.00043681	0.00038416	2.1609e-06	2.28484e-05	1.03684e-05	0.000680688
20.2	0.07239	0.07361	0.0747	0.0646	0.04013	0.05683	0.04483	0.01146		0.0477	0.0496	0.0522	0.0458	0.042	0.0511	0.0462	0.0416		0.02469	0.02401	0.0225	0.0188	-0.00187	0.00573	-0.00137	-0.03014		0.000609596	0.00057648	0.00050625	0.00035344	3.4969e-06	3.28329e-05	1.8769e-06	0.00090842
20.4	0.07379	0.06721	0.0711	0.05895	0.04153	0.05318	0.04933	0.01681		0.047	0.0497	0.0515	0.0449	0.0414	0.0508	0.0456	0.0406		0.02679	0.01751	0.0196	0.01405	0.00013	0.00238	0.00373	-0.02379		0.000717704	0.0003066	0.00038416	0.000197403	1.69e-08	5.6644e-06	1.39129e-05	0.000565964
20.6	0.07119	0.07326	0.06915	0.0593	0.04378	0.05418	0.05028	0.02081		0.0462	0.0497	0.0511	0.0444	0.0412	0.0503	0.0447	0.0399		0.02499	0.02356	0.01805	0.0149	0.00258	0.00388	0.00558	-0.01909		0.0006245	0.000555074	0.000325803	0.00022201	6.6564e-06	1.50544e-05	3.11364e-05	0.000364428
20.8	0.06954	0.06861	0.067	0.06415	0.04213	0.04708	0.04323	0.02661		0.0462	0.0496	0.0509	0.0437	0.0409	0.0495	0.0444	0.0396		0.02334	0.01901	0.0161	0.02045	0.00123	-0.00242	-0.00117	-0.01299		0.000544756	0.00036138	0.00025921	0.000418202	1.5129e-06	5.8564e-06	1.3689e-06	0.00016874
21	0.07104	0.06891	0.0694	0.0638	0.03858	0.04653	0.04183	0.01881		0.046	0.0489	0.0504	0.0434	0.0402	0.0494	0.0438	0.0395		0.02504	0.02001	0.019	0.0204	-0.00162	-0.00287	-0.00197	-0.02069		0.000627002	0.0004004	0.000361	0.00041616	2.6244e-06	8.2369e-06	3.8809e-06	0.000428076
21.2	0.06999	0.07491	0.0691	0.0642	0.03958	0.05513	0.03598	0.01566		0.0457	0.048	0.0501	0.0433	0.0395	0.0488	0.0435	0.0393		0.02429	0.02691	0.019	0.0209	8e-05	0.00633	-0.00752	-0.02364		0.000590004	0.000724148	0.000361	0.00043681	6.4e-09	4.00689e-05	5.65504e-05	0.00055885
21.4	0.07214	0.07586	0.07055	0.06075	0.03943	0.05383	0.04308	0.01196		0.0452	0.0476	0.0498	0.0428	0.0393	0.0487	0.0431	0.0385		0.02694	0.02826	0.02075	0.01795	0.00013	0.00513	-2e-05	-0.02654		0.000725764	0.000798628	0.000430563	0.000322203	1.69e-08	2.63169e-05	4e-10	0.000704372
21.6	0.06904	0.07771	0.06605	0.06015	0.04333	0.05838	0.04688	0.02446		0.0445	0.0476	0.0492	0.0424	0.0389	0.048	0.0427	0.0381		0.02454	0.03011	0.01685	0.01775	0.00443	0.01038	0.00418	-0.01364		0.000602212	0.000906612	0.000283922	0.000315063	1.96249e-05	0.000107744	1.74724e-05	0.00018605
21.8	0.07029	0.07616	0.06255	0.0651	0.04113	0.06003	0.03923	0.02151		0.0439	0.0473	0.0487	0.0419	0.0388	0.0475	0.0423	0.0378		0.02639	0.02886	0.01385	0.0232	0.00233	0.01253	-0.00307	-0.01629		0.000696432	0.0008329	0.000191822	0.00053824	5.4289e-06	0.000157001	9.4249e-06	0.000265364
22	0.07089	0.07106	0.06435	0.0636	0.04313	0.05838	0.04068	0.01936		0.044	0.0466	0.0484	0.0414	0.0383	0.047	0.0419	0.0376		0.02689	0.02446	0.01595	0.0222	0.00483	0.01138	-0.00122	-0.01824		0.000723072	0.000598292	0.000254403	0.00049284	2.33289e-05	0.000129504	1.4884e-06	0.000332698
22.2	0.06834	0.07046	0.066	0.0598	0.04088	0.05353	0.04358	0.01711		0.0438	0.0462	0.0483	0.0408	0.038	0.0466	0.0414	0.0374		0.02454	0.02426	0.0177	0.019	0.00288	0.00693	0.00218	-0.02029		0.000602212	0.000588548	0.00031329	0.000361	8.2944e-06	4.80249e-05	4.7524e-06	0.000411684
22.4	0.06949	0.06626	0.0657	0.05925	0.04278	0.05308	0.04333	0.01441		0.0435	0.046	0.0474	0.0406	0.0374	0.0463	0.041	0.037		0.02599	0.02026	0.0183	0.01865	0.00538	0.00678	0.00233	-0.02259		0.00067548	0.000410468	0.00033489	0.000347822	2.89444e-05	4.59684e-05	5.4289e-06	0.000510308
22.6	0.07089	0.06746	0.06935	0.05665	0.03878	0.05078	0.04423	0.02361		0.0429	0.0451	0.0475	0.0407	0.037	0.0462	0.0408	0.0363		0.02799	0.02236	0.02185	0.01595	0.00178	0.00458	0.00343	-0.01269		0.00078344	0.00049997	0.000477422	0.000254402	3.1684e-06	2.09764e-05	1.17649e-05	0.000161036
22.8	0.06644	0.07401	0.0648	0.0571	0.04023	0.05058	0.04053	0.01746		0.0432	0.045	0.0474	0.04	0.037	0.0455	0.0405	0.0358		0.02324	0.02901	0.0174	0.0171	0.00323	0.00508	3e-05	-0.01834		0.000540098	0.00084158	0.00030276	0.00029241	1.04329e-05	2.58064e-05	9e-10	0.000336356
23	0.06524	0.07656	0.0654	0.05625	0.03798	0.05318	0.04303	0.01061		0.043	0.0448	0.0465	0.0396	0.037	0.0453	0.04	0.0357		0.02224	0.03176	0.0189	0.01665	0.00098	0.00788	0.00303	-0.02509		0.000494618	0.0010087	0.00035721	0.000277222	9.604e-07	6.20944e-05	9.1809e-06	0.000629508
23.2	0.06684	0.06801	0.0666	0.05545	0.03818	0.05503	0.04333	0.01031		0.0429	0.0448	0.0466	0.0397	0.0364	0.045	0.0399	0.0358		0.02394	0.02321	0.02	0.01575	0.00178	0.01003	0.00343	-0.02549		0.000573124	0.000538704	0.0004	0.000248063	3.1684e-06	0.000100601	1.17649e-05	0.00064974
23.4	0.06749	0.06561	0.0653	0.05875	0.03633	0.05293	0.04268	0.02256		0.0423	0.0446	0.0466	0.0394	0.0364	0.0446	0.0397	0.0356		0.02519	0.02101	0.0187	0.01935	-7e-05	0.00833	0.00298	-0.01304		0.000634536	0.00044142	0.00034969	0.000374422	4.9e-09	6.93889e-05	8.8804e-06	0.000170042
23.6	0.06504	0.07021	0.06115	0.0582	0.03853	0.05563	0.04208	0.02041		0.0421	0.0443	0.0464	0.0392	0.0361	0.0447	0.0394	0.0354		0.02294	0.02591	0.01475	0.019	0.00243	0.01093	0.00268	-0.01499		0.000526244	0.000671328	0.000217563	0.000361	5.9049e-06	0.000119465	7.1824e-06	0.0002247
23.8	0.06874	0.07411	0.06305	0.0586	0.04158	0.05278	0.04243	0.01661		0.0419	0.044	0.0463	0.039	0.0358	0.0443	0.0393	0.035		0.02684	0.03011	0.01675	0.0196	0.00578	0.00848	0.00313	-0.01839		0.000720386	0.000906612	0.000280562	0.00038416	3.34084e-05	7.19104e-05	9.7969e-06	0.000338192
24	0.06689	0.06471	0.06545	0.05555	0.04188	0.05123	0.03843	0.00986		0.0419	0.0443	0.0459	0.0386	0.0357	0.0442	0.0388	0.0346		0.02499	0.02041	0.01955	0.01695	0.00618	0.00703	-0.00037	-0.02474		0.0006245	0.000416568	0.000382202	0.000287302	3.81924e-05	4.94209e-05	1.369e-07	0.000612068
24.2	0.06409	0.06531	0.06645	0.0547	0.03703	0.04948	0.04063	0.01856		0.0415	0.0438	0.0454	0.0385	0.0356	0.0442	0.0388	0.0346		0.02259	0.02151	0.02105	0.0162	0.00143	0.00528	0.00183	-0.01604		0.000510308	0.00046268	0.000443102	0.00026244	2.0449e-06	2.78784e-05	3.3489e-06	0.000257282
24.4	0.06729	0.06831	0.06305	0.06185	0.03923	0.04773	0.04248	0.02091		0.0414	0.0434	0.0454	0.0385	0.0353	0.0437	0.0386	0.0342		0.02589	0.02491	0.01765	0.02335	0.00393	0.00403	0.00388	-0.01329		0.000670292	0.000620508	0.000311522	0.000545223	1.54449e-05	1.62409e-05	1.50544e-05	0.000176624
24.6	0.06259	0.06556	0.06345	0.05655	0.03968	0.04873	0.04198	0.01986		0.0412	0.0433	0.0452	0.0381	0.0352	0.0435	0.0384	0.0343		0.02139	0.02226	0.01825	0.01845	0.00448	0.00523	0.00358	-0.01444		0.000457532	0.000495508	0.000333063	0.000340403	2.00704e-05	2.73529e-05	1.28164e-05	0.000208514
24.8	0.06304	0.06886	0.064	0.0549	0.04048	0.05008	0.03963	0.01441		0.041	0.0435	0.0451	0.0377	0.0348	0.0433	0.038	0.0339		0.02204	0.02536	0.0189	0.0172	0.00568	0.00678	0.00163	-0.01949		0.000485762	0.00064313	0.00035721	0.00029584	3.22624e-05	4.59684e-05	2.6569e-06	0.00037986
25	0.06314	0.06851	0.06165	0.05555	0.04273	0.04753	0.03973	0.01156		0.0408	0.0432	0.0448	0.0374	0.0346	0.0428	0.0377	0.0338		0.02234	0.02531	0.01685	0.01815	0.00813	0.00473	0.00203	-0.02224		0.000499076	0.000640596	0.000283923	0.000329422	6.60969e-05	2.23729e-05	4.1209e-06	0.000494618
25.2	0.06334	0.06691	0.06295	0.0543	0.04158	0.04593	0.04303	0.01546		0.0411	0.0435	0.0447	0.0374	0.0344	0.0427	0.0376	0.0335		0.02224	0.02341	0.01825	0.0169	0.00718	0.00323	0.00543	-0.01804		0.000494618	0.000548028	0.000333063	0.00028561	5.15524e-05	1.04329e-05	2.94849e-05	0.000325442
25.4	0.06584	0.06811	0.0639	0.0556	0.03848	0.04703	0.03958	0.01661		0.0409	0.0433	0.0445	0.0371	0.0341	0.0426	0.0372	0.0332		0.02494	0.02481	0.0194	0.0185	0.00438	0.00443	0.00238	-0.01659		0.000622004	0.000615536	0.00037636	0.00034225	1.91844e-05	1.96249e-05	5.6644e-06	0.000275228
25.6	0.06379	0.06956	0.06485	0.0544	0.03748	0.04748	0.03928	0.01271		0.0405	0.0426	0.0447	0.0371	0.0341	0.0427	0.0373	0.033		0.02329	0.02696	0.02015	0.0173	0.00338	0.00478	0.00198	-0.02029		0.000542424	0.000726842	0.000406023	0.00029929	1.14244e-05	2.28484e-05	3.9204e-06	0.000411684
25.8	0.06579	0.07061	0.06335	0.0578	0.03753	0.05143	0.04078	0.00901		0.0406	0.0427	0.0446	0.037	0.0341	0.0425	0.0372	0.0328		0.02519	0.02791	0.01875	0.0208	0.00343	0.00893	0.00358	-0.02379		0.000634536	0.000778968	0.000351563	0.00043264	1.17649e-05	7.97449e-05	1.28164e-05	0.000565964
26	0.06299	0.07181	0.05995	0.05645	0.03908	0.04698	0.03908	0.01261		0.0402	0.0425	0.044	0.0371	0.034	0.0426	0.0371	0.0329		0.02279	0.02931	0.01595	0.01935	0.00508	0.00438	0.00198	-0.02029		0.000519384	0.000859076	0.000254403	0.000374422	2.58064e-05	1.91844e-05	3.9204e-06	0.000411684
26.2	0.06134	0.06631	0.0583	0.0556	0.04018	0.05188	0.04173	0.02541		0.04	0.0423	0.044	0.0369	0.0339	0.0425	0.0371	0.0329		0.02134	0.02401	0.0143	0.0187	0.00628	0.00938	0.00463	-0.00749		0.000455396	0.00057648	0.00020449	0.00034969	3.94384e-05	8.79844e-05	2.14369e-05	5.61001e-05
26.4	0.06489	0.06786	0.0603	0.0546	0.03793	0.05023	0.04013	0.02116		0.0401	0.0419	0.0438	0.0364	0.0339	0.042	0.0369	0.0327		0.02479	0.02596	0.0165	0.0182	0.00403	0.00823	0.00323	-0.01154		0.000614544	0.000673922	0.00027225	0.00033124	1.62409e-05	6.77329e-05	1.04329e-05	0.000133172
26.6	0.06294	0.06696	0.06205	0.0532	0.03788	0.04638	0.04148	0.01801		0.0398	0.0414	0.0435	0.0362	0.0335	0.0418	0.0365	0.0326		0.02314	0.02556	0.01855	0.017	0.00438	0.00458	0.00498	-0.01459		0.00053546	0.000653314	0.000344103	0.000289	1.91844e-05	2.09764e-05	2.48004e-05	0.000212868
26.8	0.06299	0.06601	0.064	0.055	0.03958	0.04783	0.03673	0.01386		0.0394	0.0408	0.0432	0.0363	0.0333	0.0416	0.0363	0.0326		0.02359	0.02521	0.0208	0.0187	0.00628	0.00623	0.00043	-0.01874		0.000556488	0.000635544	0.00043264	0.00034969	3.94384e-05	3.88129e-05	1.849e-07	0.000351188
27	0.06019	0.06451	0.0634	0.05575	0.03518	0.05033	0.03768	0.01056		0.0392	0.0407	0.0429	0.036	0.0332	0.0414	0.0363	0.0322		0.02099	0.02381	0.0205	0.01975	0.00198	0.00893	0.00138	-0.02164		0.00044058	0.000566916	0.00042025	0.000390063	3.9204e-06	7.97449e-05	1.9044e-06	0.00046829
27.2	0.06329	0.06651	0.06065	0.0565	0.03548	0.04803	0.03853	0.01131		0.0391	0.04	0.0425	0.0357	0.0332	0.0413	0.0362	0.0321		0.02419	0.02651	0.01815	0.0208	0.00228	0.00673	0.00233	-0.02079		0.000585156	0.00070278	0.000329422	0.00043264	5.1984e-06	4.52929e-05	5.4289e-06	0.000432224
27.4	0.06294	0.07146	0.059	0.05265	0.04243	0.04448	0.04033	0.02361		0.0387	0.0398	0.0424	0.0355	0.0329	0.041	0.0358	0.032		0.02424	0.03166	0.0166	0.01715	0.00953	0.00348	0.00453	-0.00839		0.000587578	0.00100236	0.00027556	0.000294123	9.08209e-05	1.21104e-05	2.05209e-05	7.03921e-05
27.6	0.06299	0.06906	0.057	0.0579	0.04318	0.04998	0.04143	0.02091		0.0385	0.0402	0.0418	0.0353	0.0327	0.0406	0.0358	0.032		0.02449	0.02886	0.0152	0.0226	0.01048	0.00938	0.00563	-0.01109		0.00059976	0.0008329	0.00023104	0.00051076	0.00010983	8.79844e-05	3.16969e-05	0.000122988
27.8	0.06239	0.06886	0.0605	0.05525	0.03993	0.04673	0.04283	0.01656		0.0376	0.0401	0.0417	0.0351	0.0324	0.0405	0.0355	0.0316		0.02479	0.02876	0.0188	0.02015	0.00753	0.00623	0.00733	-0.01504		0.000614544	0.000827138	0.00035344	0.000406023	5.67009e-05	3.88129e-05	5.37289e-05	0.000226202
28	0.06404	0.06856	0.06275	0.0527	0.03428	0.04978	0.03853	0.01276		0.0378	0.0394	0.0419	0.0347	0.032	0.04	0.0353	0.0317		0.02624	0.02916	0.02085	0.018	0.00228	0.00978	0.00323	-0.01894		0.000688538	0.000850306	0.000434723	0.000324	5.1984e-06	9.56484e-05	1.04329e-05	0.000358724
28.2	0.06169	0.06641	0.06405	0.05005	0.03418	0.05063	0.03998	0.00746		0.0377	0.0395	0.0417	0.0344	0.0318	0.0399	0.0351	0.0314		0.02399	0.02691	0.02235	0.01565	0.00238	0.01073	0.00488	-0.02394		0.00057552	0.000724148	0.000499522	0.000244922	5.6644e-06	0.000115133	2.38144e-05	0.000573124
28.4	0.06004	0.06286	0.06325	0.0526	0.03418	0.04833	0.03833	0.00946		0.0378	0.0392	0.0413	0.0344	0.0314	0.0398	0.0345	0.031		0.02224	0.02366	0.02195	0.0182	0.00278	0.00853	0.00383	-0.02154		0.000494618	0.000559796	0.000481802	0.00033124	7.7284e-06	7.27609e-05	1.46689e-05	0.000463972
28.6	0.05939	0.06936	0.0601	0.05085	0.03418	0.04778	0.03708	0.01516		0.0372	0.0393	0.0412	0.0344	0.0313	0.0396	0.0345	0.031		0.02219	0.03006	0.0189	0.01645	0.00288	0.00818	0.00258	-0.01584		0.000492396	0.000903604	0.00035721	0.000270603	8.2944e-06	6.69124e-05	6.6564e-06	0.000250906
28.8	0.06219	0.06751	0.05775	0.0501	0.03938	0.04938	0.03743	0.01401		0.0371	0.0395	0.0411	0.0341	0.0311	0.0394	0.0345	0.0306		0.02509	0.02801	0.01665	0.016	0.00828	0.00998	0.00293	-0.01659		0.000629508	0.00078456	0.000277223	0.000256	6.85584e-05	9.96004e-05	8.5849e-06	0.000275228
29	0.06069	0.06206	0.05935	0.05175	0.03888	0.04838	0.03898	0.01561		0.0369	0.0397	0.041	0.0338	0.0309	0.0393	0.0343	0.0304		0.02379	0.02236	0.01835	0.01795	0.00798	0.00908	0.00468	-0.01479		0.000565964	0.00049997	0.000336722	0.000322203	6.36804e-05	8.24464e-05	2.19024e-05	0.000218744
29.2	0.06314	0.06301	0.0613	0.05005	0.03508	0.04573	0.03853	0.01301		0.037	0.0393	0.0412	0.0335	0.0307	0.0391	0.0339	0.0303		0.02614	0.02371	0.0201	0.01655	0.00438	0.00663	0.00463	-0.01729		0.0006833	0.000562164	0.00040401	0.000273902	1.91844e-05	4.39569e-05	2.14369e-05	0.000298944
29.4	0.06064	0.06686	0.0637	0.0537	0.03593	0.04753	0.03733	0.02181		0.0371	0.0394	0.0413	0.0334	0.0304	0.039	0.0337	0.0301		0.02354	0.02746	0.0224	0.0203	0.00553	0.00853	0.00363	-0.00829		0.000554132	0.000754052	0.00050176	0.00041209	3.05809e-05	7.27609e-05	1.31769e-05	6.87241e-05
29.6	0.06234	0.06481	0.06135	0.0565	0.03823	0.04803	0.03838	0.02346		0.0367	0.0393	0.0408	0.0334	0.0302	0.0389	0.0336	0.0299		0.02564	0.02551	0.02055	0.0231	0.00803	0.00913	0.00478	-0.00644		0.00065741	0.00065076	0.000422302	0.00053361	6.44809e-05	8.33569e-05	2.28484e-05	4.14736e-05
29.8	0.06029	0.06621	0.0586	0.0554	0.03523	0.04328	0.03968	0.01241		0.0366	0.0393	0.0408	0.0334	0.0301	0.039	0.0334	0.0297		0.02369	0.02691	0.0178	0.022	0.00513	0.00428	0.00628	-0.01729		0.000561216	0.000724148	0.00031684	0.000484	2.63169e-05	1.83184e-05	3.94384e-05	0.000298944
30	0.06069	0.07081	0.059	0.0541	0.03268	0.04773	0.03883	0.01116		0.0365	0.0389	0.0407	0.0331	0.0301	0.0388	0.0334	0.0295		0.02419	0.03191	0.0183	0.021	0.00258	0.00893	0.00543	-0.01834		0.000585156	0.00101825	0.00033489	0.000441	6.6564e-06	7.97449e-05	2.94849e-05	0.000336356
30.2	0.05919	0.06966	0.0587	0.0551	0.03278	0.04713	0.03603	0.00761		0.0369	0.039	0.0407	0.0329	0.0303	0.0387	0.0334	0.0292		0.02229	0.03066	0.018	0.0222	0.00248	0.00843	0.00263	-0.02159		0.000496844	0.000940036	0.000324	0.00049284	6.1504e-06	7.10649e-05	6.9169e-06	0.000466128
30.4	0.06124	0.06806	0.0604	0.0514	0.03163	0.04573	0.04023	0.00826		0.0369	0.0387	0.0404	0.0329	0.0302	0.0387	0.0331	0.0295		0.02434	0.02936	0.02	0.0185	0.00143	0.00703	0.00713	-0.02124		0.000592436	0.00086201	0.0004	0.00034225	2.0449e-06	4.94209e-05	5.08369e-05	0.000451138
30.6	0.06099	0.07406	0.06385	0.0449	0.03563	0.04663	0.03308	0.02626		0.0369	0.0385	0.0405	0.033	0.0303	0.0386	0.0331	0.0297		0.02409	0.03556	0.02335	0.0119	0.00533	0.00803	-2e-05	-0.00344		0.000580328	0.00126451	0.000545223	0.00014161	2.84089e-05	6.44809e-05	4e-10	1.18336e-05
30.8	0.05879	0.07251	0.06285	0.0483	0.03313	0.04658	0.03628	0.02426		0.0368	0.0384	0.0404	0.0331	0.0304	0.0384	0.0333	0.0295		0.02199	0.03411	0.02245	0.0152	0.00273	0.00818	0.00298	-0.00524		0.00048356	0.00116349	0.000504003	0.00023104	7.4529e-06	6.69124e-05	8.8804e-06	2.74576e-05
31	0.05894	0.06786	0.06245	0.0494	0.03633	0.04418	0.03548	0.01776		0.0365	0.0386	0.0405	0.0331	0.0303	0.0387	0.0333	0.0294		0.02244	0.02926	0.02195	0.0163	0.00603	0.00548	0.00218	-0.01164		0.000503554	0.000856148	0.000481802	0.00026569	3.63609e-05	3.00304e-05	4.7524e-06	0.00013549
31.2	0.06084	0.06436	0.061	0.0533	0.03703	0.04543	0.04013	0.01721		0.0367	0.0384	0.0403	0.0329	0.0304	0.0385	0.0333	0.0295		0.02414	0.02596	0.0207	0.0204	0.00663	0.00693	0.00683	-0.01229		0.00058274	0.000673922	0.00042849	0.00041616	4.39569e-05	4.80249e-05	4.66489e-05	0.000151044
31.4	0.05644	0.05711	0.05775	0.05125	0.03813	0.04293	0.03643	0.01606		0.0373	0.0384	0.0402	0.0327	0.0306	0.0383	0.0331	0.0294		0.01914	0.01871	0.01755	0.01855	0.00753	0.00463	0.00333	-0.01334		0.00036634	0.000350064	0.000308003	0.000344102	5.67009e-05	2.14369e-05	1.10889e-05	0.000177956
31.6	0.06264	0.05946	0.0581	0.05115	0.03368	0.04613	0.03673	0.01496		0.0372	0.0379	0.0401	0.0328	0.0304	0.0383	0.033	0.0295		0.02544	0.02156	0.018	0.01835	0.00328	0.00783	0.00373	-0.01454		0.000647194	0.000464834	0.000324	0.000336722	1.07584e-05	6.13089e-05	1.39129e-05	0.000211412
31.8	0.06129	0.06341	0.0591	0.04875	0.03538	0.04543	0.03718	0.01491		0.0367	0.0379	0.0401	0.0331	0.0303	0.0383	0.0332	0.0296		0.02459	0.02551	0.019	0.01565	0.00508	0.00713	0.00398	-0.01469		0.000604668	0.00065076	0.000361	0.000244923	2.58064e-05	5.08369e-05	1.58404e-05	0.000215796
32	0.05809	0.06101	0.06125	0.04785	0.03333	0.04638	0.03648	0.01416		0.0363	0.0377	0.04	0.0331	0.0303	0.0383	0.0332	0.0294		0.02179	0.02331	0.02125	0.01475	0.00303	0.00808	0.00328	-0.01524		0.000474804	0.000543356	0.000451562	0.000217562	9.1809e-06	6.52864e-05	1.07584e-05	0.000232258
32.2	0.06084	0.06261	0.06205	0.04615	0.03778	0.04298	0.03503	0.00961		0.0361	0.0373	0.0399	0.0329	0.0303	0.0384	0.0331	0.0293		0.02474	0.02531	0.02215	0.01325	0.00748	0.00458	0.00193	-0.01969		0.000612068	0.000640596	0.000490623	0.000175562	5.59504e-05	2.09764e-05	3.7249e-06	0.000387696
32.4	0.05939	0.06466	0.05905	0.0488	0.03513	0.04193	0.03713	0.01246		0.0357	0.0376	0.0395	0.0325	0.0303	0.0379	0.033	0.0292		0.02369	0.02706	0.01955	0.0163	0.00483	0.00403	0.00413	-0.01674		0.000561216	0.000732244	0.000382202	0.00026569	2.33289e-05	1.62409e-05	1.70569e-05	0.000280228
32.6	0.05629	0.05971	0.05825	0.04965	0.03783	0.03873	0.03878	0.01946		0.0353	0.0367	0.0392	0.0323	0.0299	0.0379	0.0328	0.0293		0.02099	0.02301	0.01905	0.01735	0.00793	0.00083	0.00598	-0.00984		0.00044058	0.00052946	0.000362903	0.000301022	6.28849e-05	6.889e-07	3.57604e-05	9.68256e-05
32.8	0.05954	0.05881	0.0581	0.05185	0.03383	0.03753	0.03728	0.01731		0.035	0.0366	0.0389	0.0321	0.0296	0.0376	0.0326	0.0291		0.02454	0.02221	0.0192	0.01975	0.00423	-7e-05	0.00468	-0.01179		0.000602212	0.000493284	0.00036864	0.000390063	1.78929e-05	4.9e-09	2.19024e-05	0.000139004
33	0.05949	0.06081	0.05775	0.0469	0.03518	0.04623	0.03553	0.01386		0.0348	0.0361	0.0384	0.0318	0.0295	0.0373	0.0324	0.0291		0.02469	0.02471	0.01935	0.0151	0.00568	0.00893	0.00313	-0.01524		0.000609596	0.000610584	0.000374423	0.00022801	3.22624e-05	7.97449e-05	9.7969e-06	0.000232258
33.2	0.05784	0.06086	0.06155	0.0436	0.03723	0.04908	0.03418	0.01136		0.0346	0.0361	0.0382	0.0317	0.0292	0.037	0.0322	0.0288		0.02324	0.02476	0.02335	0.0119	0.00803	0.01208	0.00198	-0.01744		0.000540098	0.000613058	0.000545223	0.00014161	6.44809e-05	0.000145926	3.9204e-06	0.000304154
33.4	0.05749	0.05826	0.0614	0.04975	0.03063	0.04433	0.03273	0.01271		0.0345	0.0357	0.0379	0.0313	0.0289	0.0365	0.0319	0.0286		0.02299	0.02256	0.0235	0.01845	0.00173	0.00783	0.00083	-0.01589		0.00052854	0.000508954	0.00055225	0.000340403	2.9929e-06	6.13089e-05	6.889e-07	0.000252492
33.6	0.05869	0.05941	0.0599	0.0507	0.03303	0.04558	0.03343	0.01451		0.0345	0.0357	0.0381	0.0311	0.0287	0.0365	0.0317	0.0285		0.02419	0.02371	0.0218	0.0196	0.00433	0.00908	0.00173	-0.01399		0.000585156	0.000562164	0.00047524	0.00038416	1.87489e-05	8.24464e-05	2.9929e-06	0.00019572
33.8	0.05789	0.06196	0.0562	0.05495	0.03573	0.04623	0.03643	0.01201		0.0344	0.0358	0.0379	0.0309	0.0284	0.0361	0.0313	0.0284		0.02349	0.02616	0.0183	0.02405	0.00733	0.01013	0.00513	-0.01639		0.00055178	0.000684346	0.00033489	0.000578402	5.37289e-05	0.000102617	2.63169e-05	0.000268632
34	0.05869	0.06201	0.05495	0.053	0.03348	0.05058	0.03898	0.01141		0.0339	0.0358	0.0378	0.031	0.0281	0.0362	0.0313	0.0282		0.02479	0.02621	0.01715	0.022	0.00538	0.01438	0.00768	-0.01679		0.000614544	0.000686964	0.000294122	0.000484	2.89444e-05	0.000206784	5.89824e-05	0.000281904
34.2	0.05759	0.06296	0.05585	0.04575	0.03193	0.04323	0.03298	0.00926		0.0339	0.0361	0.038	0.0308	0.0279	0.0362	0.0312	0.0278		0.02369	0.02686	0.01785	0.01495	0.00403	0.00703	0.00178	-0.01854		0.000561216	0.00072146	0.000318622	0.000223502	1.62409e-05	4.94209e-05	3.1684e-06	0.000343732
34.4	0.05779	0.06546	0.05825	0.0451	0.03473	0.04303	0.03703	0.00816		0.0338	0.0358	0.0379	0.0306	0.0278	0.0362	0.0311	0.0277		0.02399	0.02966	0.02035	0.0145	0.00693	0.00683	0.00593	-0.01954		0.00057552	0.000879716	0.000414123	0.00021025	4.80249e-05	4.66489e-05	3.51649e-05	0.000381812
34.6	0.05919	0.06406	0.0602	0.0392	0.02983	0.04383	0.03423	0.01901		0.0339	0.0362	0.0379	0.0304	0.0276	0.036	0.0308	0.0274		0.02529	0.02786	0.0223	0.0088	0.00223	0.00783	0.00343	-0.00839		0.000639584	0.00077618	0.00049729	7.744e-05	4.9729e-06	6.13089e-05	1.17649e-05	7.03921e-05
34.8	0.05539	0.06166	0.06055	0.04535	0.02943	0.04098	0.03433	0.01596		0.0335	0.0361	0.0377	0.0304	0.0275	0.0359	0.0307	0.0275		0.02189	0.02556	0.02285	0.01495	0.00193	0.00508	0.00363	-0.01154		0.000479172	0.000653314	0.000522123	0.000223503	3.7249e-06	2.58064e-05	1.31769e-05	0.000133172
35	0.05629	0.06231	0.0587	0.0472	0.04018	0.04173	0.03213	0.01416		0.0334	0.0356	0.0379	0.0304	0.0274	0.0361	0.0307	0.0273		0.02289	0.02671	0.0208	0.0168	0.01278	0.00563	0.00143	-0.01314		0.000523952	0.000713424	0.00043264	0.00028224	0.000163328	3.16969e-05	2.0449e-06	0.00017266
35.2	0.05574	0.06156	0.056	0.0483	0.03688	0.04508	0.03708	0.01181		0.0335	0.0354	0.0377	0.0303	0.0274	0.0359	0.0306	0.0272		0.02224	0.02616	0.0183	0.018	0.00948	0.00918	0.00648	-0.01539		0.000494618	0.000684346	0.00033489	0.000324	8.98704e-05	8.42724e-05	4.19904e-05	0.000236852
35.4	0.05394	0.06031	0.05325	0.05325	0.03668	0.04513	0.03883	0.00906		0.0331	0.0354	0.0374	0.0303	0.0273	0.036	0.0307	0.0271		0.02084	0.02491	0.01585	0.02295	0.00938	0.00913	0.00813	-0.01804		0.000434306	0.000620508	0.000251222	0.000526702	8.79844e-05	8.33569e-05	6.60969e-05	0.000325442
35.6	0.05269	0.06021	0.05245	0.0504	0.03338	0.04743	0.03358	0.00841		0.0332	0.0355	0.0373	0.0301	0.0273	0.0357	0.0305	0.027		0.01949	0.02471	0.01515	0.0203	0.00608	0.01173	0.00308	-0.01859		0.00037986	0.000610584	0.000229522	0.00041209	3.69664e-05	0.000137593	9.4864e-06	0.000345588
35.8	0.05499	0.05776	0.0578	0.0475	0.03283	0.04673	0.03438	0.01136		0.0332	0.0349	0.0372	0.0298	0.0274	0.0354	0.0304	0.0271		0.02179	0.02286	0.0206	0.0177	0.00543	0.01133	0.00398	-0.01574		0.000474804	0.00052258	0.00042436	0.00031329	2.94849e-05	0.000128369	1.58404e-05	0.000247748
36	0.05424	0.05836	0.06235	0.04125	0.03028	0.04493	0.03118	0.01271		0.0335	0.0347	0.0371	0.0297	0.0273	0.0352	0.0302	0.0269		0.02074	0.02366	0.02525	0.01155	0.00298	0.00973	0.00098	-0.01419		0.000430148	0.000559796	0.000637563	0.000133403	8.8804e-06	9.46729e-05	9.604e-07	0.000201356
36.2	0.05639	0.05996	0.0619	0.04245	0.02933	0.04213	0.03298	0.01201		0.0333	0.0345	0.0368	0.0296	0.0272	0.0352	0.0301	0.0271		0.02309	0.02546	0.0251	0.01285	0.00213	0.00693	0.00288	-0.01509		0.000533148	0.000648212	0.00063001	0.000165123	4.5369e-06	4.80249e-05	8.2944e-06	0.000227708
36.4	0.05639	0.05716	0.05645	0.04335	0.03388	0.04038	0.03208	0.01096		0.0332	0.0342	0.0367	0.0298	0.0273	0.0352	0.0301	0.0269		0.02319	0.02296	0.01975	0.01355	0.00658	0.00518	0.00198	-0.01594		0.000537776	0.000527162	0.000390062	0.000183602	4.32964e-05	2.68324e-05	3.9204e-06	0.000254084
36.6	0.05454	0.05821	0.0542	0.0417	0.03768	0.03943	0.03483	0.00936		0.033	0.0343	0.0366	0.0297	0.0273	0.035	0.0301	0.0268		0.02154	0.02391	0.0176	0.012	0.01038	0.00443	0.00473	-0.01744		0.000463972	0.000571688	0.00030976	0.000144	0.000107744	1.96249e-05	2.23729e-05	0.000304154
36.8	0.05514	0.06226	0.05205	0.0453	0.04013	0.03923	0.02898	0.01001		0.0328	0.0343	0.0364	0.0296	0.0273	0.035	0.0302	0.0267		0.02234	0.02796	0.01565	0.0157	0.01283	0.00423	-0.00122	-0.01669		0.000499076	0.000781762	0.000244922	0.00024649	0.000164609	1.78929e-05	1.4884e-06	0.000278556
37	0.05299	0.06066	0.05385	0.04555	0.03893	0.04408	0.03513	0.01616		0.0327	0.0338	0.0365	0.0295	0.0271	0.0349	0.03	0.0268		0.02029	0.02686	0.01735	0.01605	0.01183	0.00918	0.00513	-0.01064		0.000411684	0.00072146	0.000301023	0.000257603	0.000139949	8.42724e-05	2.63169e-05	0.00011321
37.2	0.05514	0.05941	0.0544	0.04455	0.02963	0.04338	0.03658	0.01411		0.033	0.0342	0.0365	0.0294	0.027	0.0348	0.03	0.0269		0.02214	0.02521	0.0179	0.01515	0.00263	0.00858	0.00658	-0.01279		0.00049018	0.000635544	0.00032041	0.000229522	6.9169e-06	7.36164e-05	4.32964e-05	0.000163584
37.4	0.05389	0.05621	0.0565	0.05015	0.03318	0.04563	0.03578	0.01136		0.0327	0.0342	0.0362	0.0293	0.0269	0.0346	0.0299	0.0267		0.02119	0.02201	0.0203	0.02085	0.00628	0.01103	0.00588	-0.01534		0.000449016	0.00048444	0.00041209	0.000434723	3.94384e-05	0.000121661	3.45744e-05	0.000235316
37.6	0.05264	0.05581	0.0569	0.0482	0.03053	0.04438	0.03398	0.00881		0.0326	0.034	0.0363	0.0293	0.0267	0.0347	0.0297	0.0267		0.02004	0.02181	0.0206	0.0189	0.00383	0.00968	0.00428	-0.01789		0.000401602	0.000475676	0.00042436	0.00035721	1.46689e-05	9.37024e-05	1.83184e-05	0.000320052
37.8	0.05324	0.05841	0.0552	0.04585	0.03163	0.03973	0.03353	0.01061		0.0324	0.0342	0.0362	0.0292	0.0266	0.0344	0.0296	0.0266		0.02084	0.02421	0.019	0.01665	0.00503	0.00533	0.00393	-0.01599		0.000434306	0.000586124	0.000361	0.000277223	2.53009e-05	2.84089e-05	1.54449e-05	0.00025568
38	0.05459	0.06056	0.0551	0.03885	0.03138	0.03943	0.03273	0.01031		0.0323	0.0343	0.036	0.029	0.0265	0.0344	0.0295	0.0264		0.02229	0.02626	0.0191	0.00985	0.00488	0.00503	0.00323	-0.01609		0.000496844	0.000689588	0.00036481	9.70225e-05	2.38144e-05	2.53009e-05	1.04329e-05	0.000258888
38.2	0.05464	0.05766	0.0474	0.04325	0.03253	0.03873	0.03083	0.01721		0.0319	0.0341	0.036	0.0289	0.0263	0.0343	0.0292	0.0262		0.02274	0.02356	0.0114	0.01435	0.00623	0.00443	0.00163	-0.00899		0.000517108	0.000555074	0.00012996	0.000205922	3.88129e-05	1.96249e-05	2.6569e-06	8.08201e-05
38.4	0.05509	0.05761	0.04795	0.04425	0.03283	0.04013	0.02953	0.01671		0.0324	0.0337	0.0361	0.0287	0.0263	0.0343	0.0293	0.0263		0.02269	0.02391	0.01185	0.01555	0.00653	0.00583	0.00023	-0.00959		0.000514836	0.000571688	0.000140422	0.000241802	4.26409e-05	3.39889e-05	5.29e-08	9.19681e-05
38.6	0.05259	0.05896	0.05305	0.03845	0.03343	0.04008	0.03128	0.01406		0.0322	0.0336	0.0359	0.0286	0.0261	0.034	0.0292	0.026		0.02039	0.02536	0.01715	0.00985	0.00733	0.00608	0.00208	-0.01194		0.000415752	0.00064313	0.000294122	9.70225e-05	5.37289e-05	3.69664e-05	4.3264e-06	0.000142564
38.8	0.05104	0.05536	0.05635	0.04335	0.02248	0.04188	0.03273	0.01081		0.0318	0.0334	0.0357	0.0286	0.0259	0.0342	0.029	0.0259		0.01924	0.02196	0.02065	0.01475	-0.00342	0.00768	0.00373	-0.01509		0.000370178	0.000482242	0.000426422	0.000217562	1.16964e-05	5.89824e-05	1.39129e-05	0.000227708
39	0.05384	0.05586	0.05965	0.0471	0.02468	0.03828	0.03483	0.01076		0.0315	0.0333	0.0356	0.0286	0.0258	0.034	0.0289	0.0258		0.02234	0.02256	0.02405	0.0185	-0.00112	0.00428	0.00593	-0.01504		0.000499076	0.000508954	0.000578403	0.00034225	1.2544e-06	1.83184e-05	3.51649e-05	0.000226202
39.2	0.05314	0.05601	0.0566	0.055	0.02548	0.03953	0.03338	0.01131		0.0315	0.0327	0.0355	0.0283	0.0259	0.0339	0.0289	0.0257		0.02164	0.02331	0.0211	0.0267	-0.00042	0.00563	0.00448	-0.01439		0.00046829	0.000543356	0.00044521	0.00071289	1.764e-07	3.16969e-05	2.00704e-05	0.000207072
39.4	0.05264	0.05376	0.05305	0.04695	0.02458	0.04083	0.02838	0.01211		0.0313	0.0328	0.0353	0.0281	0.0258	0.0337	0.0287	0.0255		0.02134	0.02096	0.01775	0.01885	-0.00122	0.00713	-0.00032	-0.01339		0.000455396	0.000439322	0.000315063	0.000355322	1.4884e-06	5.08369e-05	1.024e-07	0.000179292
39.6	0.04919	0.05741	0.0511	0.0414	0.02783	0.04243	0.02928	0.01211		0.0311	0.0327	0.0348	0.028	0.0257	0.0336	0.0285	0.0257		0.01809	0.02471	0.0163	0.0134	0.00213	0.00883	0.00078	-0.01359		0.000327248	0.000610584	0.00026569	0.00017956	4.5369e-06	7.79689e-05	6.084e-07	0.000184688
39.8	0.05139	0.05711	0.04925	0.0439	0.02928	0.03863	0.03238	0.00931		0.0312	0.0323	0.0348	0.028	0.0256	0.0334	0.0285	0.0257		0.02019	0.02481	0.01445	0.0159	0.00368	0.00523	0.00388	-0.01639		0.000407636	0.000615536	0.000208803	0.00025281	1.35424e-05	2.73529e-05	1.50544e-05	0.000268632
40	0.05084	0.05451	0.05135	0.0416	0.03228	0.04173	0.03143	0.00981		0.031	0.0323	0.0347	0.0278	0.0255	0.0332	0.0286	0.0256		0.01984	0.02221	0.01665	0.0138	0.00678	0.00853	0.00283	-0.01579		0.000393626	0.000493284	0.000277222	0.00019044	4.59684e-05	7.27609e-05	8.0089e-06	0.000249324
40.2	0.04924	0.05616	0.05395	0.0419	0.03098	0.03753	0.03103	0.01376		0.0312	0.0321	0.0346	0.0277	0.0254	0.0331	0.0284	0.0254		0.01804	0.02406	0.01935	0.0142	0.00558	0.00443	0.00263	-0.01164		0.000325442	0.000578884	0.000374422	0.00020164	3.11364e-05	1.96249e-05	6.9169e-06	0.00013549
40.4	0.05214	0.05481	0.05675	0.044	0.03183	0.03878	0.03193	0.01396		0.0308	0.0321	0.0346	0.0277	0.0252	0.0331	0.0282	0.0255		0.02134	0.02271	0.02215	0.0163	0.00663	0.00568	0.00373	-0.01154		0.000455396	0.000515744	0.000490623	0.00026569	4.39569e-05	3.22624e-05	1.39129e-05	0.000133172
40.6	0.04819	0.05431	0.0562	0.04355	0.03003	0.03918	0.03228	0.01481		0.0307	0.0321	0.0345	0.0277	0.0251	0.033	0.0282	0.0253		0.01749	0.02221	0.0217	0.01585	0.00493	0.00618	0.00408	-0.01049		0.0003059	0.000493284	0.00047089	0.000251223	2.43049e-05	3.81924e-05	1.66464e-05	0.00011004
40.8	0.04769	0.05531	0.0521	0.04265	0.02873	0.03783	0.02978	0.01001		0.0308	0.032	0.0345	0.0275	0.0252	0.033	0.0282	0.0251		0.01689	0.02331	0.0176	0.01515	0.00353	0.00483	0.00158	-0.01509		0.000285272	0.000543356	0.00030976	0.000229522	1.24609e-05	2.33289e-05	2.4964e-06	0.000227708
41	0.04974	0.05426	0.05115	0.0411	0.02733	0.03723	0.02953	0.00726		0.0306	0.0317	0.0344	0.0275	0.025	0.0329	0.0281	0.0252		0.01914	0.02256	0.01675	0.0136	0.00233	0.00433	0.00143	-0.01794		0.00036634	0.000508954	0.000280563	0.00018496	5.4289e-06	1.87489e-05	2.0449e-06	0.000321844
41.2	0.04819	0.05396	0.049	0.0409	0.03198	0.03843	0.03073	0.00751		0.0303	0.0319	0.0342	0.0275	0.025	0.0328	0.028	0.0252		0.01789	0.02206	0.0148	0.0134	0.00698	0.00563	0.00273	-0.01769		0.000320052	0.000486644	0.00021904	0.00017956	4.87204e-05	3.16969e-05	7.4529e-06	0.000312936
41.4	0.05029	0.05276	0.04935	0.0388	0.02698	0.03703	0.03208	0.01116		0.03	0.0313	0.034	0.0274	0.0248	0.0327	0.0279	0.025		0.02029	0.02146	0.01535	0.0114	0.00218	0.00433	0.00418	-0.01384		0.000411684	0.000460532	0.000235622	0.00012996	4.7524e-06	1.87489e-05	1.74724e-05	0.000191546
41.6	0.04959	0.05296	0.05065	0.0386	0.02923	0.03738	0.02848	0.01136		0.0301	0.0312	0.0341	0.0272	0.0247	0.0326	0.0279	0.0249		0.01949	0.02176	0.01655	0.0114	0.00453	0.00478	0.00058	-0.01354		0.00037986	0.000473498	0.000273903	0.00012996	2.05209e-05	2.28484e-05	3.364e-07	0.000183332
41.8	0.04749	0.05171	0.05215	0.03705	0.02728	0.03913	0.02818	0.00976		0.0297	0.0307	0.0336	0.0269	0.0246	0.0323	0.0277	0.0249		0.01779	0.02101	0.01855	0.01015	0.00268	0.00683	0.00048	-0.01514		0.000316484	0.00044142	0.000344103	0.000103022	7.1824e-06	4.66489e-05	2.304e-07	0.00022922
42	0.04894	0.05311	0.05355	0.041	0.02618	0.03608	0.02908	0.00941		0.0293	0.0306	0.0335	0.0268	0.0243	0.0323	0.0275	0.0247		0.01964	0.02251	0.02005	0.0142	0.00188	0.00378	0.00158	-0.01529		0.00038573	0.0005067	0.000402002	0.00020164	3.5344e-06	1.42884e-05	2.4964e-06	0.000233784
42.2	0.04619	0.05396	0.05175	0.04185	0.03158	0.03663	0.03038	0.00876		0.0291	0.0302	0.0332	0.0266	0.0241	0.032	0.0272	0.0246		0.01709	0.02376	0.01855	0.01525	0.00748	0.00463	0.00318	-0.01584		0.000292068	0.000564538	0.000344102	0.000232562	5.59504e-05	2.14369e-05	1.01124e-05	0.000250906
42.4	0.04959	0.05606	0.0507	0.04045	0.02878	0.03888	0.03053	0.00996		0.0288	0.0295	0.0329	0.0263	0.024	0.0318	0.0272	0.0244		0.02079	0.02656	0.0178	0.01415	0.00478	0.00708	0.00333	-0.01444		0.000432224	0.000705434	0.00031684	0.000200222	2.28484e-05	5.01264e-05	1.10889e-05	0.000208514
42.6	0.04819	0.05531	0.05005	0.0381	0.02698	0.03883	0.03068	0.00851		0.0286	0.0295	0.0325	0.0261	0.0238	0.0315	0.0269	0.0242		0.01959	0.02581	0.01755	0.012	0.00318	0.00733	0.00378	-0.01569		0.000383768	0.000666156	0.000308002	0.000144	1.01124e-05	5.37289e-05	1.42884e-05	0.000246176
42.8	0.04599	0.05246	0.0485	0.03855	0.02783	0.03848	0.03108	0.00956		0.0282	0.029	0.0321	0.0259	0.0236	0.0312	0.0268	0.0242		0.01779	0.02346	0.0164	0.01265	0.00423	0.00728	0.00428	-0.01464		0.000316484	0.000550372	0.00026896	0.000160023	1.78929e-05	5.29984e-05	1.83184e-05	0.00021433
43	0.04864	0.05051	0.0484	0.0369	0.02498	0.03823	0.02843	0.00856		0.0277	0.0288	0.0319	0.0257	0.0234	0.031	0.0265	0.024		0.02094	0.02171	0.0165	0.0112	0.00158	0.00723	0.00193	-0.01544		0.000438484	0.000471324	0.00027225	0.00012544	2.4964e-06	5.22729e-05	3.7249e-06	0.000238394
43.2	0.04649	0.05156	0.05035	0.03665	0.02758	0.03773	0.02968	0.00916		0.0275	0.0287	0.0316	0.0254	0.0232	0.0307	0.0263	0.0239		0.01899	0.02286	0.01875	0.01125	0.00438	0.00703	0.00338	-0.01474		0.00036062	0.00052258	0.000351562	0.000126563	1.91844e-05	4.94209e-05	1.14244e-05	0.000217268
43.4	0.04749	0.05216	0.05365	0.036	0.02453	0.03543	0.02988	0.01016		0.0274	0.0283	0.0314	0.0251	0.0229	0.0305	0.0261	0.0238		0.02009	0.02386	0.02225	0.0109	0.00163	0.00493	0.00378	-0.01364		0.000403608	0.0005693	0.000495063	0.00011881	2.6569e-06	2.43049e-05	1.42884e-05	0.00018605
43.6	0.04729	0.05231	0.0527	0.03435	0.02638	0.03433	0.02868	0.01291		0.0274	0.0283	0.0313	0.0249	0.0226	0.0302	0.0259	0.0236		0.01989	0.02401	0.0214	0.00945	0.00378	0.00413	0.00278	-0.01069		0.000395612	0.00057648	0.00045796	8.93025e-05	1.42884e-05	1.70569e-05	7.7284e-06	0.000114276
43.8	0.04729	0.05266	0.0528	0.03725	0.02298	0.03433	0.02828	0.01031		0.027	0.0284	0.031	0.0247	0.0224	0.03	0.0257	0.0234		0.02029	0.02426	0.0218	0.01255	0.00058	0.00433	0.00258	-0.01309		0.000411684	0.000588548	0.00047524	0.000157502	3.364e-07	1.87489e-05	6.6564e-06	0.000171348
44	0.04649	0.05086	0.0493	0.03915	0.02158	0.03593	0.02783	0.00956		0.0268	0.0282	0.031	0.0246	0.0222	0.0299	0.0255	0.0232		0.01969	0.02266	0.0183	0.01455	-0.00062	0.00603	0.00233	-0.01364		0.000387696	0.000513476	0.00033489	0.000211702	3.844e-07	3.63609e-05	5.4289e-06	0.00018605
44.2	0.04674	0.05146	0.04805	0.03755	0.02343	0.03593	0.02998	0.00706		0.0268	0.0281	0.031	0.0244	0.0219	0.0298	0.0254	0.0231		0.01994	0.02336	0.01705	0.01315	0.00153	0.00613	0.00458	-0.01604		0.000397604	0.00054569	0.000290703	0.000172922	2.3409e-06	3.75769e-05	2.09764e-05	0.000257282
44.4	0.04719	0.05261	0.04565	0.03615	0.02563	0.03548	0.03133	0.00961		0.0268	0.0281	0.0309	0.0243	0.0218	0.0296	0.0252	0.023		0.02039	0.02451	0.01475	0.01185	0.00383	0.00588	0.00613	-0.01339		0.000415752	0.00060074	0.000217563	0.000140423	1.46689e-05	3.45744e-05	3.75769e-05	0.000179292
44.6	0.04729	0.05216	0.04615	0.0371	0.02828	0.03678	0.02868	0.00986		0.0266	0.0281	0.0307	0.0242	0.0217	0.0295	0.025	0.0227		0.02069	0.02406	0.01545	0.0129	0.00658	0.00728	0.00368	-0.01284		0.000428076	0.000578884	0.000238702	0.00016641	4.32964e-05	5.29984e-05	1.35424e-05	0.000164866
44.8	0.04609	0.04986	0.04985	0.0359	0.02888	0.03453	0.02768	0.01051		0.0266	0.0281	0.0307	0.0241	0.0215	0.0295	0.0248	0.0226		0.01949	0.02176	0.01915	0.0118	0.00738	0.00503	0.00288	-0.01209		0.00037986	0.000473498	0.000366722	0.00013924	5.44644e-05	2.53009e-05	8.2944e-06	0.000146168
45	0.04699	0.04971	0.05325	0.0371	0.02798	0.03543	0.02808	0.01136		0.0267	0.028	0.0307	0.0239	0.0214	0.0293	0.0248	0.0225		0.02029	0.02171	0.02255	0.0132	0.00658	0.00613	0.00328	-0.01114		0.000411684	0.000471324	0.000508502	0.00017424	4.32964e-05	3.75769e-05	1.07584e-05	0.0001241
45.2	0.04599	0.05076	0.0523	0.0377	0.02728	0.03353	0.02513	0.00841		0.0266	0.0278	0.0306	0.0238	0.0213	0.0293	0.0247	0.0223		0.01939	0.02296	0.0217	0.0139	0.00598	0.00423	0.00043	-0.01389		0.000375972	0.000527162	0.00047089	0.00019321	3.57604e-05	1.78929e-05	1.849e-07	0.000192932
45.4	0.04659	0.05291	0.0505	0.0341	0.02363	0.03453	0.02718	0.00736		0.0264	0.0277	0.0305	0.0237	0.0211	0.0291	0.0245	0.0222		0.02019	0.02521	0.02	0.0104	0.00253	0.00543	0.00268	-0.01484		0.000407636	0.000635544	0.0004	0.00010816	6.4009e-06	2.94849e-05	7.1824e-06	0.000220226
45.6	0.04589	0.05141	0.0507	0.03605	0.02418	0.03353	0.02683	0.00771		0.0262	0.0277	0.0304	0.0235	0.021	0.0289	0.0244	0.0221		0.01969	0.02371	0.0203	0.01255	0.00318	0.00463	0.00243	-0.01439		0.000387696	0.000562164	0.00041209	0.000157502	1.01124e-05	2.14369e-05	5.9049e-06	0.000207072
45.8	0.04404	0.05271	0.0466	0.0353	0.02283	0.03348	0.02963	0.00861		0.0261	0.0276	0.0303	0.0234	0.021	0.0289	0.0242	0.0219		0.01794	0.02511	0.0163	0.0119	0.00183	0.00458	0.00543	-0.01329		0.000321844	0.000630512	0.00026569	0.00014161	3.3489e-06	2.09764e-05	2.94849e-05	0.000176624
46	0.04539	0.05376	0.04435	0.03335	0.02278	0.03633	0.02643	0.01136		0.0259	0.0275	0.0302	0.0232	0.0209	0.0287	0.0241	0.0218		0.01949	0.02626	0.01415	0.01015	0.00188	0.00763	0.00233	-0.01044		0.00037986	0.000689588	0.000200222	0.000103022	3.5344e-06	5.82169e-05	5.4289e-06	0.000108994
46.2	0.04674	0.05201	0.04465	0.0328	0.02378	0.03248	0.02758	0.00981		0.0259	0.0276	0.03	0.023	0.0208	0.0286	0.0239	0.0217		0.02084	0.02441	0.01465	0.0098	0.00298	0.00388	0.00368	-0.01189		0.000434306	0.000595848	0.000214623	9.604e-05	8.8804e-06	1.50544e-05	1.35424e-05	0.000141372
46.4	0.04624	0.05291	0.04875	0.0358	0.02723	0.03363	0.03103	0.00736		0.0261	0.0278	0.03	0.0229	0.0207	0.0285	0.0238	0.0216		0.02014	0.02511	0.01875	0.0129	0.00653	0.00513	0.00723	-0.01424		0.00040562	0.000630512	0.000351563	0.00016641	4.26409e-05	2.63169e-05	5.22729e-05	0.000202778
46.6	0.04724	0.05141	0.0517	0.0466	0.02863	0.03508	0.02793	0.01066		0.0261	0.0276	0.0299	0.0229	0.0207	0.0283	0.0238	0.0215		0.02114	0.02381	0.0218	0.0237	0.00793	0.00678	0.00413	-0.01084		0.0004469	0.000566916	0.00047524	0.00056169	6.28849e-05	4.59684e-05	1.70569e-05	0.000117506
46.8	0.04604	0.05051	0.0501	0.04465	0.02538	0.03683	0.02843	0.01001		0.0263	0.0277	0.03	0.0229	0.0207	0.0283	0.0237	0.0215		0.01974	0.02281	0.0201	0.02175	0.00468	0.00853	0.00473	-0.01149		0.000389668	0.000520296	0.00040401	0.000473063	2.19024e-05	7.27609e-05	2.23729e-05	0.00013202
47	0.04504	0.05151	0.04935	0.0386	0.02493	0.03528	0.02653	0.00871		0.0264	0.0276	0.03	0.0228	0.0207	0.0282	0.0236	0.0214		0.01864	0.02391	0.01935	0.0158	0.00423	0.00708	0.00293	-0.01269		0.00034745	0.000571688	0.000374422	0.00024964	1.78929e-05	5.01264e-05	8.5849e-06	0.000161036
47.2	0.04474	0.05021	0.0471	0.03695	0.02658	0.03478	0.02498	0.00856		0.0265	0.0272	0.0301	0.0229	0.0207	0.0282	0.0236	0.0215		0.01824	0.02301	0.017	0.01405	0.00588	0.00658	0.00138	-0.01294		0.000332698	0.00052946	0.000289	0.000197402	3.45744e-05	4.32964e-05	1.9044e-06	0.000167444
47.4	0.04339	0.05036	0.0447	0.03415	0.02898	0.03458	0.02648	0.00771		0.0266	0.027	0.0301	0.023	0.0208	0.0284	0.0235	0.0214		0.01679	0.02336	0.0146	0.01115	0.00818	0.00618	0.00298	-0.01369		0.000281904	0.00054569	0.00021316	0.000124323	6.69124e-05	3.81924e-05	8.8804e-06	0.000187416
47.6	0.04449	0.04966	0.04425	0.03365	0.03108	0.03538	0.02823	0.00836		0.0264	0.0268	0.0299	0.023	0.0209	0.0284	0.0237	0.0213		0.01809	0.02286	0.01435	0.01065	0.01018	0.00698	0.00453	-0.01294		0.000327248	0.00052258	0.000205922	0.000113422	0.000103632	4.87204e-05	2.05209e-05	0.000167444
47.8	0.04344	0.05141	0.04425	0.03575	0.03043	0.03278	0.02813	0.00731		0.0262	0.0266	0.0298	0.023	0.021	0.0286	0.0238	0.0214		0.01724	0.02481	0.01445	0.01275	0.00943	0.00418	0.00433	-0.01409		0.000297218	0.000615536	0.000208802	0.000162562	8.89249e-05	1.74724e-05	1.87489e-05	0.000198528
48	0.04314	0.05241	0.04545	0.038	0.02963	0.03303	0.02708	0.00756		0.0261	0.0264	0.0297	0.023	0.021	0.0285	0.0238	0.0214		0.01704	0.02601	0.01575	0.015	0.00863	0.00453	0.00328	-0.01384		0.000290362	0.00067652	0.000248062	0.000225	7.44769e-05	2.05209e-05	1.07584e-05	0.000191546
48.2	0.04269	0.04981	0.0487	0.0374	0.02923	0.03248	0.02798	0.00896		0.0257	0.0265	0.0294	0.0229	0.021	0.0283	0.0238	0.0214		0.01699	0.02331	0.0193	0.0145	0.00823	0.00418	0.00418	-0.01244		0.00028866	0.000543356	0.00037249	0.00021025	6.77329e-05	1.74724e-05	1.74724e-05	0.000154754
48.4	0.04459	0.05231	0.04615	0.0396	0.02468	0.03468	0.02628	0.00896		0.0256	0.0266	0.0292	0.0227	0.0209	0.0282	0.0237	0.0214		0.01899	0.02571	0.01695	0.0169	0.00378	0.00648	0.00258	-0.01244		0.00036062	0.000661004	0.000287302	0.00028561	1.42884e-05	4.19904e-05	6.6564e-06	0.000154754
48.6	0.04489	0.05211	0.04795	0.0353	0.02278	0.03363	0.02608	0.01151		0.0254	0.0267	0.0292	0.0226	0.0206	0.0279	0.0235	0.0214		0.01949	0.02541	0.01875	0.0127	0.00218	0.00573	0.00258	-0.00989		0.00037986	0.000645668	0.000351562	0.00016129	4.7524e-06	3.28329e-05	6.6564e-06	9.78121e-05
48.8	0.04354	0.04961	0.0485	0.03385	0.02673	0.03263	0.02638	0.00766		0.0255	0.0267	0.0292	0.0224	0.0204	0.0276	0.0234	0.0214		0.01804	0.02291	0.0193	0.01145	0.00633	0.00503	0.00298	-0.01374		0.000325442	0.000524868	0.00037249	0.000131102	4.00689e-05	2.53009e-05	8.8804e-06	0.000188788
49	0.04274	0.05016	0.04595	0.03295	0.02728	0.03193	0.02558	0.00691		0.0254	0.0269	0.0292	0.0223	0.0202	0.0275	0.0232	0.0213		0.01734	0.02326	0.01675	0.01065	0.00708	0.00443	0.00238	-0.01439		0.000300676	0.000541028	0.000280562	0.000113422	5.01264e-05	1.96249e-05	5.6644e-06	0.000207072
49.2	0.04394	0.05191	0.0443	0.03685	0.03073	0.03128	0.02598	0.00726		0.0256	0.0266	0.0292	0.0223	0.0201	0.0275	0.023	0.0211		0.01834	0.02531	0.0151	0.01455	0.01063	0.00378	0.00298	-0.01384		0.000336356	0.000640596	0.00022801	0.000211703	0.000112997	1.42884e-05	8.8804e-06	0.000191546
49.4	0.04344	0.05251	0.0434	0.0367	0.02888	0.03313	0.02588	0.01131		0.0257	0.0265	0.0293	0.0223	0.02	0.0274	0.023	0.0211		0.01774	0.02601	0.0141	0.0144	0.00888	0.00573	0.00288	-0.00979		0.000314708	0.00067652	0.00019881	0.00020736	7.88544e-05	3.28329e-05	8.2944e-06	9.58441e-05
49.6	0.04304	0.05251	0.0433	0.0361	0.02738	0.03453	0.02753	0.01041		0.0259	0.0264	0.0292	0.0224	0.02	0.0276	0.023	0.021		0.01714	0.02611	0.0141	0.0137	0.00738	0.00693	0.00453	-0.01059		0.00029378	0.000681732	0.00019881	0.00018769	5.44644e-05	4.80249e-05	2.05209e-05	0.000112148
49.8	0.04249	0.05171	0.04445	0.03975	0.02538	0.03398	0.02883	0.00971		0.0256	0.0261	0.029	0.0224	0.0201	0.0277	0.023	0.0209		0.01689	0.02561	0.01545	0.01735	0.00528	0.00628	0.00583	-0.01119		0.000285272	0.000655872	0.000238703	0.000301023	2.78784e-05	3.94384e-05	3.39889e-05	0.000125216
50	0.04239	0.05001	0.045	0.0376	0.02483	0.03468	0.02748	0.00906		0.0255	0.0261	0.029	0.0224	0.0202	0.0278	0.0231	0.0208		0.01689	0.02391	0.016	0.0152	0.00463	0.00688	0.00438	-0.01174		0.000285272	0.000571688	0.000256	0.00023104	2.14369e-05	4.73344e-05	1.91844e-05	0.000137828
50.2	0.04259	0.05041	0.04595	0.0335	0.02613	0.03388	0.02698	0.00796		0.0254	0.026	0.029	0.0223	0.0202	0.0277	0.0231	0.0209		0.01719	0.02441	0.01695	0.0112	0.00593	0.00618	0.00388	-0.01294		0.000295496	0.000595848	0.000287302	0.00012544	3.51649e-05	3.81924e-05	1.50544e-05	0.000167444
50.4	0.04254	0.04936	0.04655	0.0344	0.02563	0.03033	0.02438	0.00691		0.0252	0.0262	0.0289	0.0222	0.0202	0.0275	0.0232	0.0209		0.01734	0.02316	0.01765	0.0122	0.00543	0.00283	0.00118	-0.01399		0.000300676	0.000536386	0.000311523	0.00014884	2.94849e-05	8.0089e-06	1.3924e-06	0.00019572
50.6	0.04204	0.04721	0.0469	0.03245	0.02723	0.03223	0.02578	0.00696		0.0249	0.0264	0.0289	0.022	0.02	0.0274	0.0229	0.0208		0.01714	0.02081	0.018	0.01045	0.00723	0.00483	0.00288	-0.01384		0.00029378	0.000433056	0.000324	0.000109203	5.22729e-05	2.33289e-05	8.2944e-06	0.000191546
50.8	0.04019	0.04906	0.0447	0.03315	0.02708	0.03233	0.02558	0.01161		0.0248	0.0266	0.0289	0.0218	0.0197	0.0272	0.0228	0.0208		0.01539	0.02246	0.0158	0.01135	0.00738	0.00513	0.00278	-0.00919		0.000236852	0.000504452	0.00024964	0.000128822	5.44644e-05	2.63169e-05	7.7284e-06	8.44561e-05
51	0.04139	0.05221	0.0451	0.03345	0.02838	0.03128	0.02553	0.00841		0.0248	0.0266	0.029	0.0218	0.0195	0.0272	0.0227	0.0207		0.01659	0.02561	0.0161	0.01165	0.00888	0.00408	0.00283	-0.01229		0.000275228	0.000655872	0.00025921	0.000135723	7.88544e-05	1.66464e-05	8.0089e-06	0.000151044
51.2	0.04239	0.05371	0.04835	0.03225	0.02573	0.03063	0.02433	0.00726		0.0248	0.0264	0.029	0.0217	0.0194	0.0271	0.0225	0.0205		0.01759	0.02731	0.01935	0.01055	0.00633	0.00353	0.00183	-0.01324		0.000309408	0.000745836	0.000374422	0.000111303	4.00689e-05	1.24609e-05	3.3489e-06	0.000175298
51.4	0.04139	0.05551	0.04905	0.03665	0.02133	0.03273	0.02803	0.00786		0.0249	0.0262	0.0289	0.0217	0.0194	0.0271	0.0224	0.0204		0.01649	0.02931	0.02015	0.01495	0.00193	0.00563	0.00563	-0.01254		0.00027192	0.000859076	0.000406023	0.000223503	3.7249e-06	3.16969e-05	3.16969e-05	0.000157252
51.6	0.04179	0.05151	0.04905	0.03475	0.02613	0.03153	0.02648	0.00711		0.0249	0.0261	0.0287	0.0218	0.0194	0.0272	0.0223	0.0203		0.01689	0.02541	0.02035	0.01295	0.00673	0.00433	0.00418	-0.01319		0.000285272	0.000645668	0.000414123	0.000167703	4.52929e-05	1.87489e-05	1.74724e-05	0.000173976
51.8	0.04184	0.05046	0.04605	0.03135	0.02563	0.03168	0.02643	0.01131		0.0249	0.0259	0.0285	0.0218	0.0196	0.0272	0.0224	0.0204		0.01694	0.02456	0.01755	0.00955	0.00603	0.00448	0.00403	-0.00909		0.000286964	0.000603194	0.000308002	9.12025e-05	3.63609e-05	2.00704e-05	1.62409e-05	8.26281e-05
52	0.04174	0.04981	0.0467	0.0337	0.02628	0.03248	0.02408	0.01006		0.025	0.0257	0.0285	0.0218	0.0198	0.0273	0.0226	0.0204		0.01674	0.02411	0.0182	0.0119	0.00648	0.00518	0.00148	-0.01034		0.000280228	0.000581292	0.00033124	0.00014161	4.19904e-05	2.68324e-05	2.1904e-06	0.000106916
52.2	0.04159	0.05051	0.0458	0.03215	0.02628	0.03213	0.02638	0.00931		0.0251	0.0258	0.0284	0.0217	0.0199	0.0272	0.0227	0.0204		0.01649	0.02471	0.0174	0.01045	0.00638	0.00493	0.00368	-0.01109		0.00027192	0.000610584	0.00030276	0.000109202	4.07044e-05	2.43049e-05	1.35424e-05	0.000122988
52.4	0.04234	0.04901	0.0442	0.03025	0.02803	0.03283	0.02643	0.00961		0.0249	0.0261	0.0285	0.0217	0.0198	0.0271	0.0227	0.0206		0.01744	0.02291	0.0157	0.00855	0.00823	0.00573	0.00373	-0.01099		0.000304154	0.000524868	0.00024649	7.31025e-05	6.77329e-05	3.28329e-05	1.39129e-05	0.00012078
52.6	0.04139	0.04846	0.0439	0.0321	0.02723	0.03203	0.02578	0.00716		0.0248	0.026	0.0285	0.0217	0.0197	0.027	0.0225	0.0206		0.01659	0.02246	0.0154	0.0104	0.00753	0.00503	0.00328	-0.01344		0.000275228	0.000504452	0.00023716	0.00010816	5.67009e-05	2.53009e-05	1.07584e-05	0.000180634
52.8	0.04189	0.04981	0.0443	0.0347	0.02803	0.03218	0.02773	0.00786		0.025	0.0261	0.0289	0.0217	0.0196	0.0269	0.0225	0.0206		0.01689	0.02371	0.0154	0.013	0.00843	0.00528	0.00523	-0.01274		0.000285272	0.000562164	0.00023716	0.000169	7.10649e-05	2.78784e-05	2.73529e-05	0.000162308
53	0.04054	0.04801	0.04655	0.0356	0.02718	0.03193	0.02558	0.01456		0.0249	0.0262	0.0289	0.0215	0.0195	0.0268	0.0224	0.0205		0.01564	0.02181	0.01765	0.0141	0.00768	0.00513	0.00318	-0.00594		0.00024461	0.000475676	0.000311523	0.00019881	5.89824e-05	2.63169e-05	1.01124e-05	3.52836e-05
53.2	0.04124	0.04881	0.04805	0.0364	0.02553	0.03183	0.02553	0.01186		0.0249	0.0264	0.0289	0.0216	0.0193	0.0269	0.0223	0.0203		0.01634	0.02241	0.01915	0.0148	0.00623	0.00493	0.00323	-0.00844		0.000266996	0.000502208	0.000366723	0.00021904	3.88129e-05	2.43049e-05	1.04329e-05	7.12336e-05
53.4	0.04109	0.05056	0.046	0.0338	0.02408	0.03078	0.02488	0.01056		0.025	0.0264	0.0289	0.0217	0.0193	0.027	0.0222	0.0203		0.01609	0.02416	0.0171	0.0121	0.00478	0.00378	0.00268	-0.00974		0.000258888	0.000583706	0.00029241	0.00014641	2.28484e-05	1.42884e-05	7.1824e-06	9.48676e-05
53.6	0.03969	0.04791	0.0456	0.0334	0.02448	0.02938	0.02538	0.00836		0.025	0.0265	0.0288	0.0217	0.0194	0.0271	0.0223	0.0202		0.01469	0.02141	0.0168	0.0117	0.00508	0.00228	0.00308	-0.01184		0.000215796	0.000458388	0.00028224	0.00013689	2.58064e-05	5.1984e-06	9.4864e-06	0.000140186
53.8	0.04064	0.04806	0.0439	0.0344	0.02483	0.02958	0.02413	0.00651		0.0252	0.0264	0.0287	0.0217	0.0196	0.0272	0.0224	0.0202		0.01544	0.02166	0.0152	0.0127	0.00523	0.00238	0.00173	-0.01369		0.000238394	0.000469156	0.00023104	0.00016129	2.73529e-05	5.6644e-06	2.9929e-06	0.000187416
54	0.04084	0.04751	0.04185	0.03395	0.02583	0.02893	0.02758	0.00726		0.0253	0.0264	0.0287	0.0217	0.0197	0.0273	0.0224	0.0202		0.01554	0.02111	0.01315	0.01225	0.00613	0.00163	0.00518	-0.01294		0.000241492	0.000445632	0.000172922	0.000150063	3.75769e-05	2.6569e-06	2.68324e-05	0.000167444
54.2	0.04159	0.04726	0.0421	0.034	0.02768	0.03103	0.02573	0.00611		0.0255	0.0264	0.0288	0.0217	0.0197	0.0272	0.0226	0.0204		0.01609	0.02086	0.0133	0.0123	0.00798	0.00383	0.00313	-0.01429		0.000258888	0.00043514	0.00017689	0.00015129	6.36804e-05	1.46689e-05	9.7969e-06	0.000204204
54.4	0.04069	0.04511	0.04545	0.03155	0.02603	0.03038	0.02628	0.01371		0.0253	0.0263	0.0288	0.0218	0.0198	0.0272	0.0226	0.0205		0.01539	0.01881	0.01665	0.00975	0.00623	0.00318	0.00368	-0.00679		0.000236852	0.000353816	0.000277222	9.50625e-05	3.88129e-05	1.01124e-05	1.35424e-05	4.61041e-05
54.6	0.04009	0.04501	0.045	0.0318	0.02658	0.02943	0.02558	0.01146		0.0252	0.0262	0.029	0.0219	0.0197	0.0272	0.0226	0.0205		0.01489	0.01881	0.016	0.0099	0.00688	0.00223	0.00298	-0.00904		0.000221712	0.000353816	0.000256	9.801e-05	4.73344e-05	4.9729e-06	8.8804e-06	8.17216e-05
54.8	0.04179	0.04626	0.0444	0.0348	0.02683	0.03263	0.02483	0.01091		0.0253	0.0264	0.0291	0.0218	0.0197	0.0272	0.0225	0.0205		0.01649	0.01986	0.0153	0.013	0.00713	0.00543	0.00233	-0.00959		0.00027192	0.00039442	0.00023409	0.000169	5.08369e-05	2.94849e-05	5.4289e-06	9.19681e-05
55	0.04049	0.04616	0.0447	0.03425	0.02593	0.03088	0.02518	0.00861		0.0251	0.0261	0.029	0.0218	0.0197	0.0271	0.0225	0.0204		0.01539	0.02006	0.0157	0.01245	0.00623	0.00378	0.00268	-0.01179		0.000236852	0.000402404	0.00024649	0.000155003	3.88129e-05	1.42884e-05	7.1824e-06	0.000139004
55.2	0.04019	0.04836	0.0437	0.0363	0.02438	0.03133	0.02708	0.00791		0.025	0.0264	0.029	0.0217	0.0197	0.0272	0.0224	0.0203		0.01519	0.02196	0.0147	0.0146	0.00468	0.00413	0.00468	-0.01239		0.000230736	0.000482242	0.00021609	0.00021316	2.19024e-05	1.70569e-05	2.19024e-05	0.000153512
55.4	0.03954	0.04836	0.04	0.03365	0.02603	0.03108	0.02533	0.00911		0.0251	0.0264	0.0288	0.0216	0.0197	0.0271	0.0224	0.0203		0.01444	0.02196	0.0112	0.01205	0.00633	0.00398	0.00293	-0.01119		0.000208514	0.000482242	0.00012544	0.000145202	4.00689e-05	1.58404e-05	8.5849e-06	0.000125216
55.6	0.04109	0.04606	0.0408	0.03345	0.02588	0.03258	0.02628	0.00806		0.025	0.0264	0.0288	0.0216	0.0198	0.0271	0.0225	0.0203		0.01609	0.01966	0.012	0.01185	0.00608	0.00548	0.00378	-0.01224		0.000258888	0.000386516	0.000144	0.000140422	3.69664e-05	3.00304e-05	1.42884e-05	0.000149818
55.8	0.03924	0.04586	0.0403	0.028	0.02653	0.03048	0.02703	0.01056		0.0252	0.0264	0.0287	0.0216	0.0198	0.0272	0.0224	0.0204		0.01404	0.01946	0.0116	0.0064	0.00673	0.00328	0.00463	-0.00984		0.000197122	0.000378692	0.00013456	4.096e-05	4.52929e-05	1.07584e-05	2.14369e-05	9.68256e-05
56	0.04089	0.04686	0.04255	0.03015	0.02328	0.03063	0.02338	0.01326		0.0254	0.0263	0.0287	0.0217	0.0198	0.0271	0.0225	0.0205		0.01549	0.02056	0.01385	0.00845	0.00348	0.00353	0.00088	-0.00724		0.00023994	0.000422714	0.000191822	7.14025e-05	1.21104e-05	1.24609e-05	7.744e-07	5.24176e-05
56.2	0.03964	0.04566	0.0474	0.0316	0.02688	0.03163	0.02453	0.01221		0.0254	0.0262	0.0287	0.0218	0.0198	0.0272	0.0226	0.0205		0.01424	0.01946	0.0187	0.0098	0.00708	0.00443	0.00193	-0.00829		0.000202778	0.000378692	0.00034969	9.604e-05	5.01264e-05	1.96249e-05	3.7249e-06	6.87241e-05
56.4	0.04044	0.04701	0.04665	0.03495	0.02383	0.03103	0.02658	0.00876		0.0255	0.0263	0.0289	0.0218	0.0197	0.0272	0.0225	0.0204		0.01494	0.02071	0.01775	0.01315	0.00413	0.00383	0.00408	-0.01164		0.000223204	0.000428904	0.000315062	0.000172923	1.70569e-05	1.46689e-05	1.66464e-05	0.00013549
56.6	0.03984	0.04766	0.0441	0.0367	0.02303	0.02678	0.02953	0.00726		0.0254	0.0262	0.0289	0.0219	0.0197	0.0272	0.0226	0.0205		0.01444	0.02146	0.0152	0.0148	0.00333	-0.00042	0.00693	-0.01324		0.000208514	0.000460532	0.00023104	0.00021904	1.10889e-05	1.764e-07	4.80249e-05	0.000175298
56.8	0.03959	0.04881	0.04155	0.03715	0.02368	0.03143	0.02478	0.00686		0.0254	0.0263	0.029	0.0219	0.0198	0.0272	0.0226	0.0204		0.01419	0.02251	0.01255	0.01525	0.00388	0.00423	0.00218	-0.01354		0.000201356	0.0005067	0.000157502	0.000232563	1.50544e-05	1.78929e-05	4.7524e-06	0.000183332
57	0.03969	0.04786	0.04115	0.035	0.02653	0.03098	0.02458	0.00656		0.0254	0.0264	0.029	0.0219	0.0198	0.0273	0.0226	0.0204		0.01429	0.02146	0.01215	0.0131	0.00673	0.00368	0.00198	-0.01384		0.000204204	0.000460532	0.000147622	0.00017161	4.52929e-05	1.35424e-05	3.9204e-06	0.000191546
57.2	0.04039	0.04791	0.0403	0.03245	0.02473	0.03228	0.02583	0.01061		0.0253	0.0264	0.029	0.0219	0.0199	0.0272	0.0226	0.0205		0.01509	0.02151	0.0113	0.01055	0.00483	0.00508	0.00323	-0.00989		0.000227708	0.00046268	0.00012769	0.000111303	2.33289e-05	2.58064e-05	1.04329e-05	9.78121e-05
57.4	0.04034	0.04641	0.044	0.0335	0.02658	0.03008	0.02678	0.00926		0.0253	0.0266	0.029	0.0219	0.0199	0.0273	0.0226	0.0205		0.01504	0.01981	0.015	0.0116	0.00668	0.00278	0.00418	-0.01124		0.000226202	0.000392436	0.000225	0.00013456	4.46224e-05	7.7284e-06	1.74724e-05	0.000126338
57.6	0.03999	0.04511	0.0445	0.0347	0.02628	0.03228	0.02723	0.00916		0.0253	0.0265	0.029	0.0218	0.0198	0.0272	0.0226	0.0205		0.01469	0.01861	0.0155	0.0129	0.00648	0.00508	0.00463	-0.01134		0.000215796	0.000346332	0.00024025	0.00016641	4.19904e-05	2.58064e-05	2.14369e-05	0.000128596
57.8	0.04029	0.04691	0.04435	0.03565	0.02483	0.03128	0.02218	0.00806		0.0253	0.0266	0.029	0.0218	0.0198	0.0273	0.0226	0.0205		0.01499	0.02031	0.01535	0.01385	0.00503	0.00398	-0.00042	-0.01244		0.0002247	0.000412496	0.000235622	0.000191823	2.53009e-05	1.58404e-05	1.764e-07	0.000154754
58	0.03929	0.04796	0.0429	0.03775	0.02178	0.03178	0.02563	0.00641		0.0253	0.0266	0.029	0.0219	0.0198	0.0273	0.0226	0.0205		0.01399	0.02136	0.0139	0.01585	0.00198	0.00448	0.00303	-0.01409		0.00019572	0.00045625	0.00019321	0.000251223	3.9204e-06	2.00704e-05	9.1809e-06	0.000198528
58.2	0.03889	0.04771	0.04365	0.03545	0.02333	0.03128	0.02398	0.00636		0.0251	0.0263	0.0289	0.0218	0.0197	0.0273	0.0226	0.0204		0.01379	0.02141	0.01475	0.01365	0.00363	0.00398	0.00138	-0.01404		0.000190164	0.000458388	0.000217563	0.000186323	1.31769e-05	1.58404e-05	1.9044e-06	0.000197122
58.4	0.03924	0.04696	0.0409	0.03015	0.02478	0.03193	0.02653	0.00866		0.0252	0.0265	0.029	0.0219	0.0197	0.0273	0.0226	0.0204		0.01404	0.02046	0.0119	0.00825	0.00508	0.00463	0.00393	-0.01174		0.000197122	0.000418612	0.00014161	6.80625e-05	2.58064e-05	2.14369e-05	1.54449e-05	0.000137828
58.6	0.04034	0.04641	0.0404	0.03315	0.02518	0.03053	0.02438	0.01056		0.0252	0.0265	0.0289	0.0218	0.0197	0.0273	0.0226	0.0204		0.01514	0.01991	0.0115	0.01135	0.00548	0.00323	0.00178	-0.00984		0.00022922	0.000396408	0.00013225	0.000128822	3.00304e-05	1.04329e-05	3.1684e-06	9.68256e-05
58.8	0.03974	0.04586	0.04215	0.03125	0.02648	0.03018	0.02423	0.00891		0.0252	0.0264	0.0289	0.0219	0.0198	0.0272	0.0226	0.0205		0.01454	0.01946	0.01325	0.00935	0.00668	0.00298	0.00163	-0.01159		0.000211412	0.000378692	0.000175563	8.74225e-05	4.46224e-05	8.8804e-06	2.6569e-06	0.000134328
59
59.2
59.4
59.6
59.8

## Sheet: RMSE_BR_1
t	S3	S4	S5	S6	S7	S8	S9	S10		HEC_M1_P3	HEC_M1_P4	HEC_M1_P5	HEC_M1_P6	HEC_M1_P7	HEC_M1_P8	HEC_M1_P9	HEC_M1_P10		Error_3	Error_4	Error_5	Error_6	Error_7	Error_8	Error_9	Error_10		Error^2_3	Error^2_4	Error^2_5	Error^2_6	Error^2_7	Error^2_8	Error^2_9	Error^2_10		RMSE_3	RMSE_4	RMSE_5	RMSE_6	RMSE_7	RMSE_8	RMSE_9	RMSE_10
0	-1e-05	-4e-05	0	-0.00015	-2e-05	-7e-05	3e-05	1e-05		0	0	0	0	0	0	0	0		-1e-05	-4e-05	0	-0.00015	-2e-05	-7e-05	3e-05	1e-05		1e-10	1.6e-09	0	2.25e-08	4e-10	4.9e-09	9e-10	1e-10		0.681746	0.875769	0.458727	0.530576	0.455737	0.288737	0.318036	0.802454
0.2	-6e-05	1e-05	-5e-05	0.00015	8e-05	0.00013	-0.00017	1e-05		0	0	0	0	0	0	0	0		-6e-05	1e-05	-5e-05	0.00015	8e-05	0.00013	-0.00017	1e-05		3.6e-09	1e-10	2.5e-09	2.25e-08	6.4e-09	1.69e-08	2.89e-08	1e-10
0.4	0.00014	0.00011	5e-05	5e-05	3e-05	3e-05	-2e-05	1e-05		0	0	0	0	0	0	0	0		0.00014	0.00011	5e-05	5e-05	3e-05	3e-05	-2e-05	1e-05		1.96e-08	1.21e-08	2.5e-09	2.5e-09	9e-10	9e-10	4e-10	1e-10
0.6	-1e-05	-9e-05	-0.0001	-5e-05	-7e-05	8e-05	-2e-05	-4e-05		0	0	0	0	0	0	0	0		-1e-05	-9e-05	-0.0001	-5e-05	-7e-05	8e-05	-2e-05	-4e-05		1e-10	8.1e-09	1e-08	2.5e-09	4.9e-09	6.4e-09	4e-10	1.6e-09
0.8	-0.00016	-4e-05	5e-05	-5e-05	-0.00012	8e-05	-2e-05	6e-05		0	0	0	0	0	0	0	0		-0.00016	-4e-05	5e-05	-5e-05	-0.00012	8e-05	-2e-05	6e-05		2.56e-08	1.6e-09	2.5e-09	2.5e-09	1.44e-08	6.4e-09	4e-10	3.6e-09
1	4e-05	1e-05	0.00015	-0.00015	-0.00017	0.00018	-7e-05	1e-05		0	0	0	0	0	0	0	0		4e-05	1e-05	0.00015	-0.00015	-0.00017	0.00018	-7e-05	1e-05		1.6e-09	1e-10	2.25e-08	2.25e-08	2.89e-08	3.24e-08	4.9e-09	1e-10
1.2	-6e-05	0.00011	-0.0001	0.0002	0.00013	8e-05	-2e-05	-4e-05		0	0	0	0	0	0	0	0		-6e-05	0.00011	-0.0001	0.0002	0.00013	8e-05	-2e-05	-4e-05		3.6e-09	1.21e-08	1e-08	4e-08	1.69e-08	6.4e-09	4e-10	1.6e-09
1.4	0.00039	-9e-05	0.00015	0	0.00013	0.00033	-7e-05	-4e-05		0	0	0	0	0	0	0	0		0.00039	-9e-05	0.00015	0	0.00013	0.00033	-7e-05	-4e-05		1.521e-07	8.1e-09	2.25e-08	0	1.69e-08	1.089e-07	4.9e-09	1.6e-09
1.6	-6e-05	1e-05	5e-05	-5e-05	8e-05	3e-05	-2e-05	-4e-05		0	0	0	0	0	0	0	0		-6e-05	1e-05	5e-05	-5e-05	8e-05	3e-05	-2e-05	-4e-05		3.6e-09	1e-10	2.5e-09	2.5e-09	6.4e-09	9e-10	4e-10	1.6e-09
1.8	-0.00016	1e-05	0.0001	-5e-05	-2e-05	-2e-05	3e-05	-4e-05		0	0	0	0	0	0	0	0		-0.00016	1e-05	0.0001	-5e-05	-2e-05	-2e-05	3e-05	-4e-05		2.56e-08	1e-10	1e-08	2.5e-09	4e-10	4e-10	9e-10	1.6e-09
2	9e-05	0.00011	0	-0.00015	-2e-05	-7e-05	3e-05	1e-05		0	0	0	0	0	0	0	0		9e-05	0.00011	0	-0.00015	-2e-05	-7e-05	3e-05	1e-05		8.1e-09	1.21e-08	0	2.25e-08	4e-10	4.9e-09	9e-10	1e-10
2.2	-1e-05	-0.00014	0	0.00015	8e-05	-0.00017	3e-05	6e-05		0	0	0	0	0	0	0	0		-1e-05	-0.00014	0	0.00015	8e-05	-0.00017	3e-05	6e-05		1e-10	1.96e-08	0	2.25e-08	6.4e-09	2.89e-08	9e-10	3.6e-09
2.4	9e-05	1e-05	-0.00015	0	-2e-05	-7e-05	8e-05	6e-05		0	0	0	0	0	0	0	0		9e-05	1e-05	-0.00015	0	-2e-05	-7e-05	8e-05	6e-05		8.1e-09	1e-10	2.25e-08	0	4e-10	4.9e-09	6.4e-09	3.6e-09
2.6	-6e-05	1e-05	5e-05	0	-7e-05	-0.00022	8e-05	0.00011		0	0	0	0	0	0	0	0		-6e-05	1e-05	5e-05	0	-7e-05	-0.00022	8e-05	0.00011		3.6e-09	1e-10	2.5e-09	0	4.9e-09	4.84e-08	6.4e-09	1.21e-08
2.8	-0.00016	0.00011	-0.0001	-5e-05	-0.00012	-0.00012	0.00013	0.00011		0	0	0	0	0	0	0	0		-0.00016	0.00011	-0.0001	-5e-05	-0.00012	-0.00012	0.00013	0.00011		2.56e-08	1.21e-08	1e-08	2.5e-09	1.44e-08	1.44e-08	1.69e-08	1.21e-08
3	4e-05	-9e-05	0	-0.00015	-0.00012	-0.00017	0.00013	0.00011		0	0	0	0	0	0	0	0		4e-05	-9e-05	0	-0.00015	-0.00012	-0.00017	0.00013	0.00011		1.6e-09	8.1e-09	0	2.25e-08	1.44e-08	2.89e-08	1.69e-08	1.21e-08
3.2	-1e-05	-4e-05	-0.0001	0.00015	0.00023	-7e-05	0.00028	0.00011		0	0	0	0	0	0	0	0		-1e-05	-4e-05	-0.0001	0.00015	0.00023	-7e-05	0.00028	0.00011		1e-10	1.6e-09	1e-08	2.25e-08	5.29e-08	4.9e-09	7.84e-08	1.21e-08
3.4	-0.00011	-4e-05	0.0001	0	0.00013	-0.00017	3e-05	0.00036		0	0	0	0	0	0	0	0		-0.00011	-4e-05	0.0001	0	0.00013	-0.00017	3e-05	0.00036		1.21e-08	1.6e-09	1e-08	0	1.69e-08	2.89e-08	9e-10	1.296e-07
3.6	-6e-05	0.00011	0.0001	0	-2e-05	-7e-05	-0.00012	0.00011		0	0	0	0	0	0	0	0		-6e-05	0.00011	0.0001	0	-2e-05	-7e-05	-0.00012	0.00011		3.6e-09	1.21e-08	1e-08	0	4e-10	4.9e-09	1.44e-08	1.21e-08
3.8	-0.00011	-9e-05	0	-0.0001	-2e-05	-0.00017	-0.00012	1e-05		0	0	0	0	0	0	0	0		-0.00011	-9e-05	0	-0.0001	-2e-05	-0.00017	-0.00012	1e-05		1.21e-08	8.1e-09	0	1e-08	4e-10	2.89e-08	1.44e-08	1e-10
4	9e-05	6e-05	0.0003	-0.0002	-2e-05	-7e-05	-0.00022	-9e-05		0	0	0	0	0	0	0	0		9e-05	6e-05	0.0003	-0.0002	-2e-05	-7e-05	-0.00022	-9e-05		8.1e-09	3.6e-09	9e-08	4e-08	4e-10	4.9e-09	4.84e-08	8.1e-09
4.2	-6e-05	1e-05	-5e-05	0.0001	3e-05	-0.00017	-0.00012	-0.00014		0	0	0	0	0	0	0	0		-6e-05	1e-05	-5e-05	0.0001	3e-05	-0.00017	-0.00012	-0.00014		3.6e-09	1e-10	2.5e-09	1e-08	9e-10	2.89e-08	1.44e-08	1.96e-08
4.4	-0.00016	0.00011	0.00015	0	-2e-05	3e-05	-0.00012	-0.00014		0	0	0	0	0	0	0	0		-0.00016	0.00011	0.00015	0	-2e-05	3e-05	-0.00012	-0.00014		2.56e-08	1.21e-08	2.25e-08	0	4e-10	9e-10	1.44e-08	1.96e-08
4.6	-6e-05	-0.00014	-5e-05	-0.0001	-7e-05	-0.00012	-7e-05	-0.00014		0	0	0	0	0	0	0	0		-6e-05	-0.00014	-5e-05	-0.0001	-7e-05	-0.00012	-7e-05	-0.00014		3.6e-09	1.96e-08	2.5e-09	1e-08	4.9e-09	1.44e-08	4.9e-09	1.96e-08
4.8	-0.00011	1e-05	0.0001	-0.0001	-0.00017	3e-05	-0.00012	-0.00014		0	0	0	0	0	0	0	0		-0.00011	1e-05	0.0001	-0.0001	-0.00017	3e-05	-0.00012	-0.00014		1.21e-08	1e-10	1e-08	1e-08	2.89e-08	9e-10	1.44e-08	1.96e-08
5	9e-05	1e-05	-0.0001	-0.0002	-7e-05	-7e-05	-0.00012	-0.00014		0	0	0	0	0	0	0	0		9e-05	1e-05	-0.0001	-0.0002	-7e-05	-7e-05	-0.00012	-0.00014		8.1e-09	1e-10	1e-08	4e-08	4.9e-09	4.9e-09	1.44e-08	1.96e-08
5.2	-1e-05	0.00016	5e-05	0.0001	0.00013	3e-05	-7e-05	-9e-05		0	0	0	0	0	0	0	0		-1e-05	0.00016	5e-05	0.0001	0.00013	3e-05	-7e-05	-9e-05		1e-10	2.56e-08	2.5e-09	1e-08	1.69e-08	9e-10	4.9e-09	8.1e-09
5.4	-0.00021	-0.00014	-0.0001	-5e-05	0.00013	-7e-05	-2e-05	-9e-05		0	0	0	0	0	0	0	0		-0.00021	-0.00014	-0.0001	-5e-05	0.00013	-7e-05	-2e-05	-9e-05		4.41e-08	1.96e-08	1e-08	2.5e-09	1.69e-08	4.9e-09	4e-10	8.1e-09
5.6	-1e-05	1e-05	0	0	3e-05	8e-05	-2e-05	-4e-05		0	0	0	0	0	0	0	0		-1e-05	1e-05	0	0	3e-05	8e-05	-2e-05	-4e-05		1e-10	1e-10	0	0	9e-10	6.4e-09	4e-10	1.6e-09
5.8	-6e-05	1e-05	-0.00015	-0.0001	-2e-05	-2e-05	3e-05	-4e-05		0	0	0	0	0	0	0	0		-6e-05	1e-05	-0.00015	-0.0001	-2e-05	-2e-05	3e-05	-4e-05		3.6e-09	1e-10	2.25e-08	1e-08	4e-10	4e-10	9e-10	1.6e-09
6	9e-05	0.00011	5e-05	-0.00015	-2e-05	0.00028	-2e-05	1e-05		0	0	0	0	0	0	0	0		9e-05	0.00011	5e-05	-0.00015	-2e-05	0.00028	-2e-05	1e-05		8.1e-09	1.21e-08	2.5e-09	2.25e-08	4e-10	7.84e-08	4e-10	1e-10
6.2	4e-05	-9e-05	5e-05	5e-05	3e-05	-7e-05	-7e-05	-4e-05		0	0	0	0	0	0	0	0		4e-05	-9e-05	5e-05	5e-05	3e-05	-7e-05	-7e-05	-4e-05		1.6e-09	8.1e-09	2.5e-09	2.5e-09	9e-10	4.9e-09	4.9e-09	1.6e-09
6.4	-0.00016	1e-05	0.0001	-5e-05	-7e-05	-2e-05	3e-05	-9e-05		0	0	0	0	0	0	0	0		-0.00016	1e-05	0.0001	-5e-05	-7e-05	-2e-05	3e-05	-9e-05		2.56e-08	1e-10	1e-08	2.5e-09	4.9e-09	4e-10	9e-10	8.1e-09
6.6	4e-05	1e-05	0.00035	0	-7e-05	-7e-05	-7e-05	6e-05		0	0	0	0	0	0	0	0		4e-05	1e-05	0.00035	0	-7e-05	-7e-05	-7e-05	6e-05		1.6e-09	1e-10	1.225e-07	0	4.9e-09	4.9e-09	4.9e-09	3.6e-09
6.8	-0.00011	0.00011	0	-0.0001	-0.00012	-0.00022	-7e-05	-4e-05		0	0	0	0	0	0	0	0		-0.00011	0.00011	0	-0.0001	-0.00012	-0.00022	-7e-05	-4e-05		1.21e-08	1.21e-08	0	1e-08	1.44e-08	4.84e-08	4.9e-09	1.6e-09
7	9e-05	-9e-05	0.00015	-5e-05	-2e-05	-0.00017	-7e-05	-4e-05		0	0	0	0	0	0	0	0		9e-05	-9e-05	0.00015	-5e-05	-2e-05	-0.00017	-7e-05	-4e-05		8.1e-09	8.1e-09	2.25e-08	2.5e-09	4e-10	2.89e-08	4.9e-09	1.6e-09
7.2	-6e-05	1e-05	0	5e-05	0.00013	-0.00022	-7e-05	1e-05		0	0	0	0	0	0	0	0		-6e-05	1e-05	0	5e-05	0.00013	-0.00022	-7e-05	1e-05		3.6e-09	1e-10	0	2.5e-09	1.69e-08	4.84e-08	4.9e-09	1e-10
7.4	-0.00016	1e-05	5e-05	-5e-05	8e-05	-0.00012	-2e-05	-4e-05		0	0	0	0	0	0	0	0		-0.00016	1e-05	5e-05	-5e-05	8e-05	-0.00012	-2e-05	-4e-05		2.56e-08	1e-10	2.5e-09	2.5e-09	6.4e-09	1.44e-08	4e-10	1.6e-09
7.6	-1e-05	0.00016	-0.0001	0	3e-05	-0.00022	-2e-05	1e-05		0	0	0	0	0	0	0	0		-1e-05	0.00016	-0.0001	0	3e-05	-0.00022	-2e-05	1e-05		1e-10	2.56e-08	1e-08	0	9e-10	4.84e-08	4e-10	1e-10
7.8	-0.00011	-9e-05	5e-05	-0.00015	-2e-05	-7e-05	-2e-05	1e-05		0	0	0	0	0	0	0	0		-0.00011	-9e-05	5e-05	-0.00015	-2e-05	-7e-05	-2e-05	1e-05		1.21e-08	8.1e-09	2.5e-09	2.25e-08	4e-10	4.9e-09	4e-10	1e-10
8	0.00029	1e-05	-0.00015	0.00015	3e-05	-0.00022	-2e-05	1e-05		0	0	0	0	0	0	0	0		0.00029	1e-05	-0.00015	0.00015	3e-05	-0.00022	-2e-05	1e-05		8.41e-08	1e-10	2.25e-08	2.25e-08	9e-10	4.84e-08	4e-10	1e-10
8.2	-0.00011	1e-05	0	0.0001	-2e-05	-7e-05	3e-05	1e-05		0	0	0	0	0	0	0	0		-0.00011	1e-05	0	0.0001	-2e-05	-7e-05	3e-05	1e-05		1.21e-08	1e-10	0	1e-08	4e-10	4.9e-09	9e-10	1e-10
8.4	-0.00016	0.00021	-0.0002	-5e-05	-2e-05	-0.00022	3e-05	6e-05		0	0	0	0	0	0	0	0		-0.00016	0.00021	-0.0002	-5e-05	-2e-05	-0.00022	3e-05	6e-05		2.56e-08	4.41e-08	4e-08	2.5e-09	4e-10	4.84e-08	9e-10	3.6e-09
8.6	-1e-05	-0.00014	5e-05	-5e-05	-0.00012	3e-05	8e-05	0.00011		0	0	0	0	0	0	0	0		-1e-05	-0.00014	5e-05	-5e-05	-0.00012	3e-05	8e-05	0.00011		1e-10	1.96e-08	2.5e-09	2.5e-09	1.44e-08	9e-10	6.4e-09	1.21e-08
8.8	-6e-05	-4e-05	-5e-05	-0.00015	-0.00017	-0.00017	8e-05	6e-05		0	0	0	0	0	0	0	0		-6e-05	-4e-05	-5e-05	-0.00015	-0.00017	-0.00017	8e-05	6e-05		3.6e-09	1.6e-09	2.5e-09	2.25e-08	2.89e-08	2.89e-08	6.4e-09	3.6e-09
9	4e-05	1e-05	5e-05	0.00025	3e-05	-2e-05	0.00028	0.00011		0	0	0	0	0	0	0	0		4e-05	1e-05	5e-05	0.00025	3e-05	-2e-05	0.00028	0.00011		1.6e-09	1e-10	2.5e-09	6.25e-08	9e-10	4e-10	7.84e-08	1.21e-08
9.2	-0.00011	0.00031	0.00035	5e-05	8e-05	-0.00012	3e-05	0.00016		0	0	0	0	0	0	0	0		-0.00011	0.00031	0.00035	5e-05	8e-05	-0.00012	3e-05	0.00016		1.21e-08	9.61e-08	1.225e-07	2.5e-09	6.4e-09	1.44e-08	9e-10	2.56e-08
9.4	-0.00016	-0.00014	-5e-05	-5e-05	3e-05	-2e-05	-7e-05	0.00016		0	0	0	0	0	0	0	0		-0.00016	-0.00014	-5e-05	-5e-05	3e-05	-2e-05	-7e-05	0.00016		2.56e-08	1.96e-08	2.5e-09	2.5e-09	9e-10	4e-10	4.9e-09	2.56e-08
9.6	4e-05	-0.00024	0.0001	-5e-05	-2e-05	-0.00012	-0.00017	6e-05		0	0	0	0	0	0	0	0		4e-05	-0.00024	0.0001	-5e-05	-2e-05	-0.00012	-0.00017	6e-05		1.6e-09	5.76e-08	1e-08	2.5e-09	4e-10	1.44e-08	2.89e-08	3.6e-09
9.8	-1e-05	1e-05	-5e-05	-0.00015	-7e-05	8e-05	-0.00012	-0.00014		0	0	0	0	0	0	0	0		-1e-05	1e-05	-5e-05	-0.00015	-7e-05	8e-05	-0.00012	-0.00014		1e-10	1e-10	2.5e-09	2.25e-08	4.9e-09	6.4e-09	1.44e-08	1.96e-08
10	-0.00011	0.00041	0	0.0001	3e-05	-7e-05	-0.00017	-0.00019		0	0	0	0	0	0	0	0		-0.00011	0.00041	0	0.0001	3e-05	-7e-05	-0.00017	-0.00019		1.21e-08	1.681e-07	0	1e-08	9e-10	4.9e-09	2.89e-08	3.61e-08
10.2	-0.00011	-4e-05	-0.0001	-5e-05	-2e-05	0.00023	-0.00017	-0.00019		0	0	0	0	0	0	0	0		-0.00011	-4e-05	-0.0001	-5e-05	-2e-05	0.00023	-0.00017	-0.00019		1.21e-08	1.6e-09	1e-08	2.5e-09	4e-10	5.29e-08	2.89e-08	3.61e-08
10.4	-0.00016	-0.00024	5e-05	-5e-05	-2e-05	-0.00012	-0.00017	-0.00014		0	0	0	0	0	0	0	0		-0.00016	-0.00024	5e-05	-5e-05	-2e-05	-0.00012	-0.00017	-0.00014		2.56e-08	5.76e-08	2.5e-09	2.5e-09	4e-10	1.44e-08	2.89e-08	1.96e-08
10.6	4e-05	1e-05	-0.00015	-5e-05	-0.00012	-0.00012	-0.00012	-0.00019		0	0	0	0	0	0	0	0		4e-05	1e-05	-0.00015	-5e-05	-0.00012	-0.00012	-0.00012	-0.00019		1.6e-09	1e-10	2.25e-08	2.5e-09	1.44e-08	1.44e-08	1.44e-08	3.61e-08
10.8	-6e-05	0.00066	-5e-05	-0.0002	-0.00017	-0.00017	-0.00012	-0.00014		0	0	0	0	0	0	0	0		-6e-05	0.00066	-5e-05	-0.0002	-0.00017	-0.00017	-0.00012	-0.00014		3.6e-09	4.356e-07	2.5e-09	4e-08	2.89e-08	2.89e-08	1.44e-08	1.96e-08
11	-0.00016	0.01081	-0.00015	0.0001	0.00013	-0.00027	-7e-05	-0.00014		0	0	0	0	0	0	0	0		-0.00016	0.01081	-0.00015	0.0001	0.00013	-0.00027	-7e-05	-0.00014		2.56e-08	0.000116856	2.25e-08	1e-08	1.69e-08	7.29e-08	4.9e-09	1.96e-08
11.2	0.00204	0.01051	5e-05	0	8e-05	-0.00012	-7e-05	-9e-05		0	0	0	0	0	0	0	0		0.00204	0.01051	5e-05	0	8e-05	-0.00012	-7e-05	-9e-05		4.1616e-06	0.00011046	2.5e-09	0	6.4e-09	1.44e-08	4.9e-09	8.1e-09
11.4	0.00929	0.01211	0.00365	0	3e-05	-0.00032	-7e-05	-9e-05		0	0	0	0	0	0	0	0		0.00929	0.01211	0.00365	0	3e-05	-0.00032	-7e-05	-9e-05		8.63041e-05	0.000146652	1.33225e-05	0	9e-10	1.024e-07	4.9e-09	8.1e-09
11.6	0.01154	0.01786	0.01275	-0.0001	3e-05	-0.00017	-2e-05	-4e-05		0	0.0341	0	0	0	0	0	0		0.01154	-0.01624	0.01275	-0.0001	3e-05	-0.00017	-2e-05	-4e-05		0.000133172	0.000263738	0.000162562	1e-08	9e-10	2.89e-08	4e-10	1.6e-09
11.8	0.01224	0.02656	0.01795	-0.0002	-0.00012	-0.00027	-2e-05	-4e-05		0.0367	0.0309	0	0	0	0	0	0		-0.02446	-0.00434	0.01795	-0.0002	-0.00012	-0.00027	-2e-05	-4e-05		0.000598292	1.88356e-05	0.000322203	4e-08	1.44e-08	7.29e-08	4e-10	1.6e-09
12	0.01389	0.03236	0.0167	0.0028	-0.00012	-0.00017	-0.00017	-4e-05		0.0358	0.0642	0.0359	0	0	0	0	0		-0.02191	-0.03184	-0.0192	0.0028	-0.00012	-0.00017	-0.00017	-4e-05		0.000480048	0.00101379	0.00036864	7.84e-06	1.44e-08	2.89e-08	2.89e-08	1.6e-09
12.2	0.01684	0.03216	0.01835	0.00595	-7e-05	-0.00022	-2e-05	-0.00019		0.0491	0.0696	0.0278	0	0	0	0	0		-0.03226	-0.03744	-0.00945	0.00595	-7e-05	-0.00022	-2e-05	-0.00019		0.00104071	0.00140175	8.93025e-05	3.54025e-05	4.9e-09	4.84e-08	4e-10	3.61e-08
12.4	0.01794	0.03646	0.0221	0.00635	0.00508	0.00563	-7e-05	1e-05		0.05	0.0696	0.0348	0	0	0	0	0		-0.03206	-0.03314	-0.0127	0.00635	0.00508	0.00563	-7e-05	1e-05		0.00102784	0.00109826	0.00016129	4.03225e-05	2.58064e-05	3.16969e-05	4.9e-09	1e-10
12.6	0.01994	0.03596	0.0244	0.0134	0.00718	0.01163	-7e-05	1e-05		0.0515	0.0688	0.0436	0.0169	0	0	0	0		-0.03156	-0.03284	-0.0192	-0.0035	0.00718	0.01163	-7e-05	1e-05		0.000996034	0.00107847	0.00036864	1.225e-05	5.15524e-05	0.000135257	4.9e-09	1e-10
12.8	0.02579	0.04336	0.0287	0.01565	0.00888	0.01123	-7e-05	-4e-05		0.0585	0.0711	0.0298	0.0217	0	0.0157	0	0		-0.03271	-0.02774	-0.0011	-0.00605	0.00888	-0.00447	-7e-05	-4e-05		0.00106994	0.000769508	1.21e-06	3.66025e-05	7.88544e-05	1.99809e-05	4.9e-09	1.6e-09
13	0.03714	0.05026	0.03785	0.01655	0.00933	0.02568	0.00263	-4e-05		0.0591	0.0727	0.0367	0.0176	0.0181	0.012	0	0		-0.02196	-0.02244	0.00115	-0.00105	-0.00877	0.01368	0.00263	-4e-05		0.000482242	0.000503554	1.3225e-06	1.1025e-06	7.69129e-05	0.000187142	6.9169e-06	1.6e-09
13.2	0.04459	0.05761	0.0466	0.01715	0.00873	0.03688	0.00498	-4e-05		0.0576	0.0741	0.0596	0.0268	0.0124	0.025	0	0		-0.01301	-0.01649	-0.013	-0.00965	-0.00367	0.01188	0.00498	-4e-05		0.00016926	0.00027192	0.000169	9.31225e-05	1.34689e-05	0.000141134	2.48004e-05	1.6e-09
13.4	0.04989	0.06971	0.0498	0.02405	0.01243	0.03593	0.00293	-4e-05		0.0635	0.0751	0.0606	0.0317	0.0117	0.0253	0.0086	0		-0.01361	-0.00539	-0.0108	-0.00765	0.00073	0.01063	-0.00567	-4e-05		0.000185232	2.90521e-05	0.00011664	5.85225e-05	5.329e-07	0.000112997	3.21489e-05	1.6e-09
13.6	0.06959	0.07761	0.0514	0.02615	0.01448	0.03508	0.00383	0.00116		0.0643	0.078	0.0567	0.0264	0.0147	0.0287	0.0094	0		0.00529	-0.00039	-0.0053	-0.00025	-0.00022	0.00638	-0.00557	0.00116		2.79841e-05	1.521e-07	2.809e-05	6.25e-08	4.84e-08	4.07044e-05	3.10249e-05	1.3456e-06
13.8	0.07604	0.09786	0.0611	0.0335	0.01423	0.03808	0.00793	0.00371		0.0681	0.08	0.0601	0.0257	0.0164	0.0294	0.011	0		0.00794	0.01786	0.001	0.0078	-0.00217	0.00868	-0.00307	0.00371		6.30436e-05	0.00031898	1e-06	6.084e-05	4.7089e-06	7.53424e-05	9.4249e-06	1.37641e-05
14	0.07349	0.09986	0.0654	0.03585	0.01748	0.04083	0.01478	0.00296		0.0682	0.0837	0.0604	0.0283	0.0238	0.029	0.0127	0		0.00529	0.01616	0.005	0.00755	-0.00632	0.01183	0.00208	0.00296		2.79841e-05	0.000261146	2.5e-05	5.70025e-05	3.99424e-05	0.000139949	4.3264e-06	8.7616e-06
14.2	0.07234	0.09626	0.0739	0.0494	0.01353	0.03683	0.01713	0.00521		0.0676	0.0854	0.0694	0.0302	0.0312	0.0305	0.0201	0		0.00474	0.01086	0.0045	0.0192	-0.01767	0.00633	-0.00297	0.00521		2.24676e-05	0.00011794	2.025e-05	0.00036864	0.000312229	4.00689e-05	8.8209e-06	2.71441e-05
14.4	0.07174	0.07411	0.0755	0.05075	0.01613	0.03723	0.01978	0.01086		0.0672	0.0849	0.0708	0.0334	0.032	0.0332	0.0233	0.0229		0.00454	-0.01079	0.0047	0.01735	-0.01587	0.00403	-0.00352	-0.01204		2.06116e-05	0.000116424	2.209e-05	0.000301023	0.000251857	1.62409e-05	1.23904e-05	0.000144962
14.6	0.06834	0.06826	0.077	0.0545	0.02118	0.03538	0.02338	0.01176		0.0684	0.0819	0.0697	0.0391	0.0306	0.0361	0.0255	0.017		-6e-05	-0.01364	0.0073	0.0154	-0.00942	-0.00072	-0.00212	-0.00524		3.6e-09	0.00018605	5.329e-05	0.00023716	8.87364e-05	5.184e-07	4.4944e-06	2.74576e-05
14.8	0.06979	0.06686	0.071	0.05585	0.02933	0.04408	0.01983	0.00971		0.0683	0.082	0.0686	0.0368	0.0312	0.0372	0.0221	0.0134		0.00149	-0.01514	0.0024	0.01905	-0.00187	0.00688	-0.00227	-0.00369		2.2201e-06	0.00022922	5.76e-06	0.000362902	3.4969e-06	4.73344e-05	5.1529e-06	1.36161e-05
15	0.06729	0.05431	0.0706	0.05295	0.02458	0.04708	0.02123	0.00966		0.0677	0.0833	0.0685	0.0385	0.0319	0.0383	0.0262	0.0127		-0.00041	-0.02899	0.0021	0.01445	-0.00732	0.00878	-0.00497	-0.00304		1.681e-07	0.00084042	4.41e-06	0.000208802	5.35824e-05	7.70884e-05	2.47009e-05	9.2416e-06
15.2	0.05639	0.06126	0.0714	0.05065	0.02568	0.04873	0.02823	0.01201		0.0688	0.0831	0.0696	0.0411	0.0329	0.0389	0.0269	0.0135		-0.01241	-0.02184	0.0018	0.00955	-0.00722	0.00983	0.00133	-0.00149		0.000154008	0.000476986	3.24e-06	9.12025e-05	5.21284e-05	9.66289e-05	1.7689e-06	2.2201e-06
15.4	0.05179	0.05901	0.07695	0.0519	0.02878	0.04558	0.02578	0.01696		0.0711	0.0841	0.071	0.0426	0.0337	0.0397	0.0284	0.0168		-0.01931	-0.02509	0.00595	0.0093	-0.00492	0.00588	-0.00262	0.00016		0.000372876	0.000629508	3.54025e-05	8.649e-05	2.42064e-05	3.45744e-05	6.8644e-06	2.56e-08
15.6	0.04294	0.05846	0.07595	0.06815	0.03343	0.04438	0.02938	0.01666		0.0707	0.0858	0.0718	0.0448	0.0367	0.0419	0.0298	0.0211		-0.02776	-0.02734	0.00415	0.02335	-0.00327	0.00248	-0.00042	-0.00444		0.000770618	0.000747476	1.72225e-05	0.000545223	1.06929e-05	6.1504e-06	1.764e-07	1.97136e-05
15.8	0.05719	0.06526	0.0763	0.06585	0.03823	0.04713	0.02868	0.01861		0.0711	0.0864	0.0717	0.0473	0.0387	0.0444	0.0329	0.0197		-0.01391	-0.02114	0.0046	0.01855	-0.00047	0.00273	-0.00422	-0.00109		0.000193488	0.0004469	2.116e-05	0.000344103	2.209e-07	7.4529e-06	1.78084e-05	1.1881e-06
16	0.05904	0.06071	0.0817	0.0582	0.03218	0.05343	0.03658	0.01636		0.0716	0.0875	0.0717	0.05	0.041	0.0464	0.0372	0.0187		-0.01256	-0.02679	0.01	0.0082	-0.00882	0.00703	-0.00062	-0.00234		0.000157754	0.000717704	0.0001	6.724e-05	7.77924e-05	4.94209e-05	3.844e-07	5.4756e-06
16.2	0.06914	0.06146	0.0814	0.06375	0.02833	0.05068	0.03503	0.02056		0.0719	0.0861	0.072	0.0513	0.0433	0.0486	0.0388	0.0204		-0.00276	-0.02464	0.0094	0.01245	-0.01497	0.00208	-0.00377	0.00016		7.6176e-06	0.00060713	8.836e-05	0.000155003	0.000224101	4.3264e-06	1.42129e-05	2.56e-08
16.4	0.06989	0.07661	0.0782	0.05895	0.03993	0.05153	0.03643	0.01381		0.0713	0.0882	0.0716	0.0515	0.0453	0.05	0.0409	0.0207		-0.00141	-0.01159	0.0066	0.00745	-0.00537	0.00153	-0.00447	-0.00689		1.9881e-06	0.000134328	4.356e-05	5.55025e-05	2.88369e-05	2.3409e-06	1.99809e-05	4.74721e-05
16.6	0.07379	0.06681	0.082	0.0592	0.04083	0.05138	0.03693	0.01701		0.0713	0.0876	0.0718	0.0513	0.046	0.0505	0.0426	0.0211		0.00249	-0.02079	0.0102	0.0079	-0.00517	0.00088	-0.00567	-0.00409		6.2001e-06	0.000432224	0.00010404	6.241e-05	2.67289e-05	7.744e-07	3.21489e-05	1.67281e-05
16.8	0.07604	0.08126	0.07955	0.06915	0.04373	0.05268	0.03763	0.02261		0.0747	0.0869	0.0732	0.0516	0.0465	0.0511	0.0437	0.0216		0.00134	-0.00564	0.00635	0.01755	-0.00277	0.00158	-0.00607	0.00101		1.7956e-06	3.18096e-05	4.03225e-05	0.000308003	7.6729e-06	2.4964e-06	3.68449e-05	1.0201e-06
17	0.07794	0.07866	0.0755	0.06865	0.04203	0.05548	0.04463	0.02211		0.0738	0.0888	0.0733	0.0535	0.0468	0.0517	0.045	0.0234		0.00414	-0.01014	0.0022	0.01515	-0.00477	0.00378	-0.00037	-0.00129		1.71396e-05	0.00010282	4.84e-06	0.000229523	2.27529e-05	1.42884e-05	1.369e-07	1.6641e-06
17.2	0.07469	0.07716	0.08105	0.06565	0.03713	0.05258	0.04333	0.01911		0.0735	0.0879	0.0735	0.0564	0.0481	0.0536	0.0459	0.0249		0.00119	-0.01074	0.00755	0.00925	-0.01097	-0.00102	-0.00257	-0.00579		1.4161e-06	0.000115348	5.70025e-05	8.55625e-05	0.000120341	1.0404e-06	6.6049e-06	3.35241e-05
17.4	0.07719	0.07941	0.082	0.06695	0.04623	0.05003	0.04313	0.01546		0.0752	0.0867	0.0742	0.057	0.0495	0.0549	0.0477	0.0245		0.00199	-0.00729	0.0078	0.00995	-0.00327	-0.00487	-0.00457	-0.00904		3.9601e-06	5.31441e-05	6.084e-05	9.90025e-05	1.06929e-05	2.37169e-05	2.08849e-05	8.17216e-05
17.6	0.07644	0.08206	0.08045	0.06735	0.04683	0.05058	0.04453	0.02236		0.0736	0.0861	0.0746	0.0581	0.0505	0.0561	0.0481	0.0251		0.00284	-0.00404	0.00585	0.00925	-0.00367	-0.00552	-0.00357	-0.00274		8.0656e-06	1.63216e-05	3.42225e-05	8.55625e-05	1.34689e-05	3.04704e-05	1.27449e-05	7.5076e-06
17.8	0.07539	0.08211	0.07425	0.06775	0.04773	0.05263	0.04663	0.02091		0.0729	0.0871	0.0744	0.0583	0.0512	0.0565	0.0491	0.0257		0.00249	-0.00499	-0.00015	0.00945	-0.00347	-0.00387	-0.00247	-0.00479		6.2001e-06	2.49001e-05	2.25e-08	8.93025e-05	1.20409e-05	1.49769e-05	6.1009e-06	2.29441e-05
18	0.07459	0.07896	0.0725	0.0722	0.04173	0.05813	0.04513	0.01526		0.0736	0.0859	0.0745	0.0577	0.051	0.0558	0.0496	0.0255		0.00099	-0.00694	-0.002	0.0145	-0.00927	0.00233	-0.00447	-0.01024		9.801e-07	4.81636e-05	4e-06	0.00021025	8.59329e-05	5.4289e-06	1.99809e-05	0.000104858
18.2	0.07589	0.07516	0.0737	0.06995	0.04483	0.06038	0.04253	0.01886		0.0744	0.0852	0.0746	0.0578	0.0513	0.0553	0.049	0.0258		0.00149	-0.01004	-0.0009	0.01215	-0.00647	0.00508	-0.00647	-0.00694		2.2201e-06	0.000100802	8.1e-07	0.000147623	4.18609e-05	2.58064e-05	4.18609e-05	4.81636e-05
18.4	0.07639	0.07616	0.07315	0.06665	0.04868	0.05143	0.04403	0.01781		0.0733	0.0849	0.0739	0.0585	0.0515	0.0553	0.049	0.0264		0.00309	-0.00874	-0.00075	0.00815	-0.00282	-0.00387	-0.00497	-0.00859		9.5481e-06	7.63876e-05	5.625e-07	6.64225e-05	7.9524e-06	1.49769e-05	2.47009e-05	7.37881e-05
18.6	0.07719	0.07821	0.0766	0.0661	0.04678	0.05363	0.05088	0.01821		0.0732	0.0848	0.073	0.0595	0.0516	0.0559	0.0497	0.0268		0.00399	-0.00659	0.0036	0.0066	-0.00482	-0.00227	0.00118	-0.00859		1.59201e-05	4.34281e-05	1.296e-05	4.356e-05	2.32324e-05	5.1529e-06	1.3924e-06	7.37881e-05
18.8	0.07559	0.07751	0.07355	0.0696	0.04058	0.05628	0.04728	0.02026		0.0729	0.0839	0.0731	0.0594	0.052	0.0563	0.0501	0.0268		0.00269	-0.00639	0.00045	0.0102	-0.01142	-2e-05	-0.00282	-0.00654		7.2361e-06	4.08321e-05	2.025e-07	0.00010404	0.000130416	4e-10	7.9524e-06	4.27716e-05
19	0.07604	0.07886	0.075	0.066	0.04123	0.05663	0.04368	0.01861		0.0726	0.0836	0.0736	0.0592	0.052	0.0565	0.0501	0.0273		0.00344	-0.00474	0.0014	0.0068	-0.01077	0.00013	-0.00642	-0.00869		1.18336e-05	2.24676e-05	1.96e-06	4.624e-05	0.000115993	1.69e-08	4.12164e-05	7.55161e-05
19.2	0.07449	0.07701	0.07315	0.0656	0.04068	0.05543	0.04853	0.01326		0.0704	0.0826	0.0735	0.0586	0.0518	0.0562	0.0504	0.0271		0.00409	-0.00559	-0.00035	0.007	-0.01112	-0.00077	-0.00187	-0.01384		1.67281e-05	3.12481e-05	1.225e-07	4.9e-05	0.000123654	5.929e-07	3.4969e-06	0.000191546
19.4	0.07524	0.08196	0.06975	0.06485	0.04548	0.04843	0.04173	0.01371		0.0697	0.0818	0.0727	0.0586	0.0516	0.0559	0.05	0.0267		0.00554	0.00016	-0.00295	0.00625	-0.00612	-0.00747	-0.00827	-0.01299		3.06916e-05	2.56e-08	8.7025e-06	3.90625e-05	3.74544e-05	5.58009e-05	6.83929e-05	0.00016874
19.6	0.07454	0.08271	0.0712	0.07045	0.04978	0.04818	0.04498	0.01971		0.0701	0.0807	0.0711	0.0582	0.0518	0.0556	0.0496	0.0265		0.00444	0.00201	0.0001	0.01225	-0.00202	-0.00742	-0.00462	-0.00679		1.97136e-05	4.0401e-06	1e-08	0.000150062	4.0804e-06	5.50564e-05	2.13444e-05	4.61041e-05
19.8	0.07154	0.07421	0.07345	0.0698	0.04628	0.05408	0.04433	0.02181		0.0686	0.0793	0.0698	0.0585	0.0515	0.0551	0.0492	0.0268		0.00294	-0.00509	0.00365	0.0113	-0.00522	-0.00102	-0.00487	-0.00499		8.6436e-06	2.59081e-05	1.33225e-05	0.00012769	2.72484e-05	1.0404e-06	2.37169e-05	2.49001e-05
20	0.07534	0.07441	0.0734	0.0655	0.04163	0.05608	0.04308	0.01561		0.068	0.0783	0.0696	0.0582	0.0507	0.0547	0.0492	0.0264		0.00734	-0.00389	0.0038	0.0073	-0.00907	0.00138	-0.00612	-0.01079		5.38756e-05	1.51321e-05	1.444e-05	5.329e-05	8.22649e-05	1.9044e-06	3.74544e-05	0.000116424
20.2	0.07239	0.07361	0.0747	0.0646	0.04013	0.05683	0.04483	0.01146		0.0684	0.0784	0.0695	0.0577	0.05	0.0547	0.0489	0.0258		0.00399	-0.00479	0.0052	0.0069	-0.00987	0.00213	-0.00407	-0.01434		1.59201e-05	2.29441e-05	2.704e-05	4.761e-05	9.74169e-05	4.5369e-06	1.65649e-05	0.000205636
20.4	0.07379	0.06721	0.0711	0.05895	0.04153	0.05318	0.04933	0.01681		0.0678	0.0775	0.069	0.0573	0.0497	0.0548	0.0488	0.0256		0.00599	-0.01029	0.0021	0.00165	-0.00817	-0.00162	0.00053	-0.00879		3.58801e-05	0.000105884	4.41e-06	2.7225e-06	6.67489e-05	2.6244e-06	2.809e-07	7.72641e-05
20.6	0.07119	0.07326	0.06915	0.0593	0.04378	0.05418	0.05028	0.02081		0.067	0.0771	0.0686	0.0572	0.0498	0.0545	0.0487	0.0257		0.00419	-0.00384	0.00055	0.0021	-0.00602	-0.00032	0.00158	-0.00489		1.75561e-05	1.47456e-05	3.025e-07	4.41e-06	3.62404e-05	1.024e-07	2.4964e-06	2.39121e-05
20.8	0.06954	0.06861	0.067	0.06415	0.04213	0.04708	0.04323	0.02661		0.0662	0.076	0.0685	0.0573	0.0495	0.0538	0.0485	0.026		0.00334	-0.00739	-0.0015	0.00685	-0.00737	-0.00672	-0.00527	0.00061		1.11556e-05	5.46121e-05	2.25e-06	4.69225e-05	5.43169e-05	4.51584e-05	2.77729e-05	3.721e-07
21	0.07104	0.06891	0.0694	0.0638	0.03858	0.04653	0.04183	0.01881		0.0662	0.0758	0.0682	0.0571	0.0491	0.0535	0.0479	0.0258		0.00484	-0.00689	0.0012	0.0067	-0.01052	-0.00697	-0.00607	-0.00699		2.34256e-05	4.74721e-05	1.44e-06	4.489e-05	0.00011067	4.85809e-05	3.68449e-05	4.88601e-05
21.2	0.06999	0.07491	0.0691	0.0642	0.03958	0.05513	0.03598	0.01566		0.0663	0.0749	0.0677	0.0569	0.0488	0.0533	0.0474	0.0256		0.00369	1e-05	0.0014	0.0073	-0.00922	0.00183	-0.01142	-0.00994		1.36161e-05	1e-10	1.96e-06	5.329e-05	8.50084e-05	3.3489e-06	0.000130416	9.88036e-05
21.4	0.07214	0.07586	0.07055	0.06075	0.03943	0.05383	0.04308	0.01196		0.066	0.0743	0.0673	0.0566	0.0487	0.0533	0.0472	0.0255		0.00614	0.00156	0.00325	0.00415	-0.00927	0.00053	-0.00412	-0.01354		3.76996e-05	2.4336e-06	1.05625e-05	1.72225e-05	8.59329e-05	2.809e-07	1.69744e-05	0.000183332
21.6	0.06904	0.07771	0.06605	0.06015	0.04333	0.05838	0.04688	0.02446		0.0651	0.0736	0.0669	0.0564	0.0482	0.0533	0.0471	0.0254		0.00394	0.00411	-0.00085	0.00375	-0.00487	0.00508	-0.00022	-0.00094		1.55236e-05	1.68921e-05	7.225e-07	1.40625e-05	2.37169e-05	2.58064e-05	4.84e-08	8.836e-07
21.8	0.07029	0.07616	0.06255	0.0651	0.04113	0.06003	0.03923	0.02151		0.0651	0.0733	0.0668	0.0562	0.0479	0.0534	0.0471	0.0252		0.00519	0.00286	-0.00425	0.0089	-0.00677	0.00663	-0.00787	-0.00369		2.69361e-05	8.1796e-06	1.80625e-05	7.921e-05	4.58329e-05	4.39569e-05	6.19369e-05	1.36161e-05
22	0.07089	0.07106	0.06435	0.0636	0.04313	0.05838	0.04068	0.01936		0.0643	0.0736	0.0664	0.056	0.0477	0.0531	0.047	0.0251		0.00659	-0.00254	-0.00205	0.0076	-0.00457	0.00528	-0.00632	-0.00574		4.34281e-05	6.4516e-06	4.2025e-06	5.776e-05	2.08849e-05	2.78784e-05	3.99424e-05	3.29476e-05
22.2	0.06834	0.07046	0.066	0.0598	0.04088	0.05353	0.04358	0.01711		0.0638	0.0729	0.066	0.0554	0.0476	0.0528	0.0468	0.0251		0.00454	-0.00244	0	0.0044	-0.00672	0.00073	-0.00322	-0.00799		2.06116e-05	5.9536e-06	0	1.936e-05	4.51584e-05	5.329e-07	1.03684e-05	6.38401e-05
22.4	0.06949	0.06626	0.0657	0.05925	0.04278	0.05308	0.04333	0.01441		0.0641	0.0722	0.0653	0.055	0.0474	0.0525	0.0467	0.0253		0.00539	-0.00594	0.0004	0.00425	-0.00462	0.00058	-0.00337	-0.01089		2.90521e-05	3.52836e-05	1.6e-07	1.80625e-05	2.13444e-05	3.364e-07	1.13569e-05	0.000118592
22.6	0.07089	0.06746	0.06935	0.05665	0.03878	0.05078	0.04423	0.02361		0.0636	0.0719	0.0646	0.0548	0.0472	0.0521	0.0466	0.0251		0.00729	-0.00444	0.00475	0.00185	-0.00842	-0.00132	-0.00237	-0.00149		5.31441e-05	1.97136e-05	2.25625e-05	3.4225e-06	7.08964e-05	1.7424e-06	5.6169e-06	2.2201e-06
22.8	0.06644	0.07401	0.0648	0.0571	0.04023	0.05058	0.04053	0.01746		0.0631	0.0716	0.0641	0.0547	0.0468	0.0519	0.0464	0.0252		0.00334	0.00241	0.0007	0.0024	-0.00657	-0.00132	-0.00587	-0.00774		1.11556e-05	5.8081e-06	4.9e-07	5.76e-06	4.31649e-05	1.7424e-06	3.44569e-05	5.99076e-05
23	0.06524	0.07656	0.0654	0.05625	0.03798	0.05318	0.04303	0.01061		0.0628	0.0713	0.0639	0.0544	0.0465	0.0517	0.0463	0.0252		0.00244	0.00526	0.0015	0.00185	-0.00852	0.00148	-0.00327	-0.01459		5.9536e-06	2.76676e-05	2.25e-06	3.4225e-06	7.25904e-05	2.1904e-06	1.06929e-05	0.000212868
23.2	0.06684	0.06801	0.0666	0.05545	0.03818	0.05503	0.04333	0.01031		0.0621	0.0712	0.0637	0.0541	0.0462	0.0514	0.0461	0.0253		0.00474	-0.00319	0.0029	0.00135	-0.00802	0.00363	-0.00277	-0.01499		2.24676e-05	1.01761e-05	8.41e-06	1.8225e-06	6.43204e-05	1.31769e-05	7.6729e-06	0.0002247
23.4	0.06749	0.06561	0.0653	0.05875	0.03633	0.05293	0.04268	0.02256		0.062	0.0707	0.0634	0.0538	0.046	0.0513	0.046	0.0251		0.00549	-0.00509	0.0019	0.00495	-0.00967	0.00163	-0.00332	-0.00254		3.01401e-05	2.59081e-05	3.61e-06	2.45025e-05	9.35089e-05	2.6569e-06	1.10224e-05	6.4516e-06
23.6	0.06504	0.07021	0.06115	0.0582	0.03853	0.05563	0.04208	0.02041		0.0615	0.0706	0.0631	0.0537	0.0457	0.051	0.0457	0.025		0.00354	-0.00039	-0.00195	0.0045	-0.00717	0.00463	-0.00362	-0.00459		1.25316e-05	1.521e-07	3.8025e-06	2.025e-05	5.14089e-05	2.14369e-05	1.31044e-05	2.10681e-05
23.8	0.06874	0.07411	0.06305	0.0586	0.04158	0.05278	0.04243	0.01661		0.0606	0.0697	0.0627	0.0535	0.0453	0.0509	0.0453	0.0249		0.00814	0.00441	0.00035	0.0051	-0.00372	0.00188	-0.00287	-0.00829		6.62596e-05	1.94481e-05	1.225e-07	2.601e-05	1.38384e-05	3.5344e-06	8.2369e-06	6.87241e-05
24	0.06689	0.06471	0.06545	0.05555	0.04188	0.05123	0.03843	0.00986		0.0609	0.0696	0.0625	0.0534	0.0451	0.0509	0.0448	0.0249		0.00599	-0.00489	0.00295	0.00215	-0.00322	0.00033	-0.00637	-0.01504		3.58801e-05	2.39121e-05	8.7025e-06	4.6225e-06	1.03684e-05	1.089e-07	4.05769e-05	0.000226202
24.2	0.06409	0.06531	0.06645	0.0547	0.03703	0.04948	0.04063	0.01856		0.06	0.0689	0.0619	0.0535	0.0449	0.051	0.0445	0.0249		0.00409	-0.00359	0.00455	0.0012	-0.00787	-0.00152	-0.00387	-0.00634		1.67281e-05	1.28881e-05	2.07025e-05	1.44e-06	6.19369e-05	2.3104e-06	1.49769e-05	4.01956e-05
24.4	0.06729	0.06831	0.06305	0.06185	0.03923	0.04773	0.04248	0.02091		0.0596	0.0685	0.0614	0.0535	0.0447	0.0512	0.0446	0.0248		0.00769	-0.00019	0.00165	0.00835	-0.00547	-0.00347	-0.00212	-0.00389		5.91361e-05	3.61e-08	2.7225e-06	6.97225e-05	2.99209e-05	1.20409e-05	4.4944e-06	1.51321e-05
24.6	0.06259	0.06556	0.06345	0.05655	0.03968	0.04873	0.04198	0.01986		0.0595	0.0682	0.0607	0.0532	0.0446	0.0513	0.0448	0.0246		0.00309	-0.00264	0.00275	0.00335	-0.00492	-0.00257	-0.00282	-0.00474		9.5481e-06	6.9696e-06	7.5625e-06	1.12225e-05	2.42064e-05	6.6049e-06	7.9524e-06	2.24676e-05
24.8	0.06304	0.06886	0.064	0.0549	0.04048	0.05008	0.03963	0.01441		0.0592	0.0678	0.0606	0.0528	0.0445	0.051	0.0451	0.0248		0.00384	0.00106	0.0034	0.0021	-0.00402	-0.00092	-0.00547	-0.01039		1.47456e-05	1.1236e-06	1.156e-05	4.41e-06	1.61604e-05	8.464e-07	2.99209e-05	0.000107952
25	0.06314	0.06851	0.06165	0.05555	0.04273	0.04753	0.03973	0.01156		0.059	0.0679	0.0606	0.0523	0.0443	0.0507	0.0453	0.0248		0.00414	0.00061	0.00105	0.00325	-0.00157	-0.00317	-0.00557	-0.01324		1.71396e-05	3.721e-07	1.1025e-06	1.05625e-05	2.4649e-06	1.00489e-05	3.10249e-05	0.000175298
25.2	0.06334	0.06691	0.06295	0.0543	0.04158	0.04593	0.04303	0.01546		0.0587	0.0677	0.0605	0.0517	0.0442	0.0501	0.0453	0.025		0.00464	-0.00079	0.00245	0.0026	-0.00262	-0.00417	-0.00227	-0.00954		2.15296e-05	6.241e-07	6.0025e-06	6.76e-06	6.8644e-06	1.73889e-05	5.1529e-06	9.10116e-05
25.4	0.06584	0.06811	0.0639	0.0556	0.03848	0.04703	0.03958	0.01661		0.0588	0.0672	0.0603	0.0513	0.0441	0.0498	0.045	0.025		0.00704	0.00091	0.0036	0.0043	-0.00562	-0.00277	-0.00542	-0.00839		4.95616e-05	8.281e-07	1.296e-05	1.849e-05	3.15844e-05	7.6729e-06	2.93764e-05	7.03921e-05
25.6	0.06379	0.06956	0.06485	0.0544	0.03748	0.04748	0.03928	0.01271		0.0588	0.0667	0.0599	0.0512	0.0438	0.0497	0.0448	0.0249		0.00499	0.00286	0.00495	0.0032	-0.00632	-0.00222	-0.00552	-0.01219		2.49001e-05	8.1796e-06	2.45025e-05	1.024e-05	3.99424e-05	4.9284e-06	3.04704e-05	0.000148596
25.8	0.06579	0.07061	0.06335	0.0578	0.03753	0.05143	0.04078	0.00901		0.0586	0.0663	0.0594	0.0512	0.0435	0.0499	0.0446	0.0248		0.00719	0.00431	0.00395	0.0066	-0.00597	0.00153	-0.00382	-0.01579		5.16961e-05	1.85761e-05	1.56025e-05	4.356e-05	3.56409e-05	2.3409e-06	1.45924e-05	0.000249324
26	0.06299	0.07181	0.05995	0.05645	0.03908	0.04698	0.03908	0.01261		0.058	0.066	0.059	0.0513	0.0432	0.0501	0.0445	0.0248		0.00499	0.00581	0.00095	0.00515	-0.00412	-0.00312	-0.00542	-0.01219		2.49001e-05	3.37561e-05	9.025e-07	2.65225e-05	1.69744e-05	9.7344e-06	2.93764e-05	0.000148596
26.2	0.06134	0.06631	0.0583	0.0556	0.04018	0.05188	0.04173	0.02541		0.0579	0.0653	0.0588	0.051	0.0431	0.0501	0.0443	0.0247		0.00344	0.00101	-0.0005	0.0046	-0.00292	0.00178	-0.00257	0.00071		1.18336e-05	1.0201e-06	2.5e-07	2.116e-05	8.5264e-06	3.1684e-06	6.6049e-06	5.041e-07
26.4	0.06489	0.06786	0.0603	0.0546	0.03793	0.05023	0.04013	0.02116		0.0577	0.0649	0.0586	0.0509	0.043	0.0498	0.0441	0.0245		0.00719	0.00296	0.0017	0.0037	-0.00507	0.00043	-0.00397	-0.00334		5.16961e-05	8.7616e-06	2.89e-06	1.369e-05	2.57049e-05	1.849e-07	1.57609e-05	1.11556e-05
26.6	0.06294	0.06696	0.06205	0.0532	0.03788	0.04638	0.04148	0.01801		0.0576	0.0646	0.0584	0.0507	0.0431	0.0494	0.0439	0.0245		0.00534	0.00236	0.00365	0.0025	-0.00522	-0.00302	-0.00242	-0.00649		2.85156e-05	5.5696e-06	1.33225e-05	6.25e-06	2.72484e-05	9.1204e-06	5.8564e-06	4.21201e-05
26.8	0.06299	0.06601	0.064	0.055	0.03958	0.04783	0.03673	0.01386		0.0568	0.0641	0.0583	0.0506	0.043	0.0492	0.0437	0.0247		0.00619	0.00191	0.0057	0.0044	-0.00342	-0.00137	-0.00697	-0.01084		3.83161e-05	3.6481e-06	3.249e-05	1.936e-05	1.16964e-05	1.8769e-06	4.85809e-05	0.000117506
27	0.06019	0.06451	0.0634	0.05575	0.03518	0.05033	0.03768	0.01056		0.057	0.0637	0.0581	0.0505	0.0428	0.049	0.0436	0.0247		0.00319	0.00081	0.0053	0.00525	-0.00762	0.00133	-0.00592	-0.01414		1.01761e-05	6.561e-07	2.809e-05	2.75625e-05	5.80644e-05	1.7689e-06	3.50464e-05	0.00019994
27.2	0.06329	0.06651	0.06065	0.0565	0.03548	0.04803	0.03853	0.01131		0.0568	0.0629	0.0578	0.0503	0.0426	0.0488	0.0435	0.0245		0.00649	0.00361	0.00285	0.0062	-0.00712	-0.00077	-0.00497	-0.01319		4.21201e-05	1.30321e-05	8.1225e-06	3.844e-05	5.06944e-05	5.929e-07	2.47009e-05	0.000173976
27.4	0.06294	0.07146	0.059	0.05265	0.04243	0.04448	0.04033	0.02361		0.0566	0.0627	0.0575	0.05	0.0423	0.0486	0.0436	0.0246		0.00634	0.00876	0.0015	0.00265	0.00013	-0.00412	-0.00327	-0.00099		4.01956e-05	7.67376e-05	2.25e-06	7.0225e-06	1.69e-08	1.69744e-05	1.06929e-05	9.801e-07
27.6	0.06299	0.06906	0.057	0.0579	0.04318	0.04998	0.04143	0.02091		0.0559	0.062	0.0571	0.0497	0.0418	0.0485	0.0436	0.0245		0.00709	0.00706	-0.0001	0.0082	0.00138	0.00148	-0.00217	-0.00359		5.02681e-05	4.98436e-05	1e-08	6.724e-05	1.9044e-06	2.1904e-06	4.7089e-06	1.28881e-05
27.8	0.06239	0.06886	0.0605	0.05525	0.03993	0.04673	0.04283	0.01656		0.0556	0.062	0.0571	0.0492	0.0414	0.0483	0.0435	0.0244		0.00679	0.00686	0.0034	0.00605	-0.00147	-0.00157	-0.00067	-0.00784		4.61041e-05	4.70596e-05	1.156e-05	3.66025e-05	2.1609e-06	2.4649e-06	4.489e-07	6.14656e-05
28	0.06404	0.06856	0.06275	0.0527	0.03428	0.04978	0.03853	0.01276		0.0552	0.0618	0.0569	0.0488	0.0412	0.0481	0.0431	0.0242		0.00884	0.00676	0.00585	0.0039	-0.00692	0.00168	-0.00457	-0.01144		7.81456e-05	4.56976e-05	3.42225e-05	1.521e-05	4.78864e-05	2.8224e-06	2.08849e-05	0.000130874
28.2	0.06169	0.06641	0.06405	0.05005	0.03418	0.05063	0.03998	0.00746		0.055	0.0616	0.0568	0.0486	0.041	0.0478	0.0426	0.0242		0.00669	0.00481	0.00725	0.00145	-0.00682	0.00283	-0.00262	-0.01674		4.47561e-05	2.31361e-05	5.25625e-05	2.1025e-06	4.65124e-05	8.0089e-06	6.8644e-06	0.000280228
28.4	0.06004	0.06286	0.06325	0.0526	0.03418	0.04833	0.03833	0.00946		0.0547	0.0611	0.0566	0.0485	0.0409	0.0475	0.0422	0.0241		0.00534	0.00176	0.00665	0.0041	-0.00672	0.00083	-0.00387	-0.01464		2.85156e-05	3.0976e-06	4.42225e-05	1.681e-05	4.51584e-05	6.889e-07	1.49769e-05	0.00021433
28.6	0.05939	0.06936	0.0601	0.05085	0.03418	0.04778	0.03708	0.01516		0.0543	0.0606	0.0563	0.0485	0.0408	0.0471	0.0419	0.024		0.00509	0.00876	0.0038	0.00235	-0.00662	0.00068	-0.00482	-0.00884		2.59081e-05	7.67376e-05	1.444e-05	5.5225e-06	4.38244e-05	4.624e-07	2.32324e-05	7.81456e-05
28.8	0.06219	0.06751	0.05775	0.0501	0.03938	0.04938	0.03743	0.01401		0.0538	0.0605	0.0557	0.0484	0.0407	0.0469	0.0416	0.024		0.00839	0.00701	0.00205	0.0017	-0.00132	0.00248	-0.00417	-0.00999		7.03921e-05	4.91401e-05	4.2025e-06	2.89e-06	1.7424e-06	6.1504e-06	1.73889e-05	9.98001e-05
29	0.06069	0.06206	0.05935	0.05175	0.03888	0.04838	0.03898	0.01561		0.0536	0.0613	0.0556	0.0482	0.0405	0.0466	0.0415	0.0239		0.00709	0.00076	0.00375	0.00355	-0.00162	0.00178	-0.00252	-0.00829		5.02681e-05	5.776e-07	1.40625e-05	1.26025e-05	2.6244e-06	3.1684e-06	6.3504e-06	6.87241e-05
29.2	0.06314	0.06301	0.0613	0.05005	0.03508	0.04573	0.03853	0.01301		0.0539	0.0613	0.0557	0.0478	0.0402	0.0465	0.0414	0.0236		0.00924	0.00171	0.0056	0.00225	-0.00512	-0.00077	-0.00287	-0.01059		8.53776e-05	2.9241e-06	3.136e-05	5.0625e-06	2.62144e-05	5.929e-07	8.2369e-06	0.000112148
29.4	0.06064	0.06686	0.0637	0.0537	0.03593	0.04753	0.03733	0.02181		0.0538	0.0612	0.0561	0.0476	0.0396	0.0464	0.0413	0.0236		0.00684	0.00566	0.0076	0.0061	-0.00367	0.00113	-0.00397	-0.00179		4.67856e-05	3.20356e-05	5.776e-05	3.721e-05	1.34689e-05	1.2769e-06	1.57609e-05	3.2041e-06
29.6	0.06234	0.06481	0.06135	0.0565	0.03823	0.04803	0.03838	0.02346		0.054	0.0607	0.0561	0.0474	0.0393	0.0464	0.0412	0.0235		0.00834	0.00411	0.00525	0.0091	-0.00107	0.00163	-0.00282	-4e-05		6.95556e-05	1.68921e-05	2.75625e-05	8.281e-05	1.1449e-06	2.6569e-06	7.9524e-06	1.6e-09
29.8	0.06029	0.06621	0.0586	0.0554	0.03523	0.04328	0.03968	0.01241		0.0543	0.0608	0.056	0.0474	0.0391	0.0463	0.041	0.0233		0.00599	0.00541	0.0026	0.008	-0.00387	-0.00302	-0.00132	-0.01089		3.58801e-05	2.92681e-05	6.76e-06	6.4e-05	1.49769e-05	9.1204e-06	1.7424e-06	0.000118592
30	0.06069	0.07081	0.059	0.0541	0.03268	0.04773	0.03883	0.01116		0.0541	0.0607	0.0556	0.0473	0.0392	0.0463	0.0409	0.0232		0.00659	0.01011	0.0034	0.0068	-0.00652	0.00143	-0.00207	-0.01204		4.34281e-05	0.000102212	1.156e-05	4.624e-05	4.25104e-05	2.0449e-06	4.2849e-06	0.000144962
30.2	0.05919	0.06966	0.0587	0.0551	0.03278	0.04713	0.03603	0.00761		0.0547	0.0609	0.0556	0.0471	0.0393	0.046	0.0407	0.0234		0.00449	0.00876	0.0031	0.008	-0.00652	0.00113	-0.00467	-0.01579		2.01601e-05	7.67376e-05	9.61e-06	6.4e-05	4.25104e-05	1.2769e-06	2.18089e-05	0.000249324
30.4	0.06124	0.06806	0.0604	0.0514	0.03163	0.04573	0.04023	0.00826		0.0544	0.0608	0.0555	0.0468	0.0394	0.0458	0.0407	0.0236		0.00684	0.00726	0.0049	0.0046	-0.00777	-7e-05	-0.00047	-0.01534		4.67856e-05	5.27076e-05	2.401e-05	2.116e-05	6.03729e-05	4.9e-09	2.209e-07	0.000235316
30.6	0.06099	0.07406	0.06385	0.0449	0.03563	0.04663	0.03308	0.02626		0.0543	0.0608	0.0558	0.0466	0.0394	0.0456	0.0408	0.0234		0.00669	0.01326	0.00805	-0.0017	-0.00377	0.00103	-0.00772	0.00286		4.47561e-05	0.000175828	6.48025e-05	2.89e-06	1.42129e-05	1.0609e-06	5.95984e-05	8.1796e-06
30.8	0.05879	0.07251	0.06285	0.0483	0.03313	0.04658	0.03628	0.02426		0.0542	0.0608	0.0559	0.0463	0.0395	0.0456	0.0407	0.0234		0.00459	0.01171	0.00695	0.002	-0.00637	0.00098	-0.00442	0.00086		2.10681e-05	0.000137124	4.83025e-05	4e-06	4.05769e-05	9.604e-07	1.95364e-05	7.396e-07
31	0.05894	0.06786	0.06245	0.0494	0.03633	0.04418	0.03548	0.01776		0.0546	0.0607	0.056	0.0464	0.0395	0.0454	0.0407	0.0233		0.00434	0.00716	0.00645	0.003	-0.00317	-0.00122	-0.00522	-0.00554		1.88356e-05	5.12656e-05	4.16025e-05	9e-06	1.00489e-05	1.4884e-06	2.72484e-05	3.06916e-05
31.2	0.06084	0.06436	0.061	0.0533	0.03703	0.04543	0.04013	0.01721		0.0545	0.0609	0.0558	0.0467	0.0395	0.0453	0.0406	0.0233		0.00634	0.00346	0.0052	0.0066	-0.00247	0.00013	-0.00047	-0.00609		4.01956e-05	1.19716e-05	2.704e-05	4.356e-05	6.1009e-06	1.69e-08	2.209e-07	3.70881e-05
31.4	0.05644	0.05711	0.05775	0.05125	0.03813	0.04293	0.03643	0.01606		0.0548	0.0608	0.0557	0.0467	0.0394	0.0453	0.0406	0.0233		0.00164	-0.00369	0.00205	0.00455	-0.00127	-0.00237	-0.00417	-0.00724		2.6896e-06	1.36161e-05	4.2025e-06	2.07025e-05	1.6129e-06	5.6169e-06	1.73889e-05	5.24176e-05
31.6	0.06264	0.05946	0.0581	0.05115	0.03368	0.04613	0.03673	0.01496		0.0548	0.0601	0.0559	0.0469	0.0392	0.0453	0.0405	0.0234		0.00784	-0.00064	0.0022	0.00425	-0.00552	0.00083	-0.00377	-0.00844		6.14656e-05	4.096e-07	4.84e-06	1.80625e-05	3.04704e-05	6.889e-07	1.42129e-05	7.12336e-05
31.8	0.06129	0.06341	0.0591	0.04875	0.03538	0.04543	0.03718	0.01491		0.0545	0.0598	0.0561	0.0468	0.0391	0.0454	0.0404	0.0233		0.00679	0.00361	0.003	0.00195	-0.00372	3e-05	-0.00322	-0.00839		4.61041e-05	1.30321e-05	9e-06	3.8025e-06	1.38384e-05	9e-10	1.03684e-05	7.03921e-05
32	0.05809	0.06101	0.06125	0.04785	0.03333	0.04638	0.03648	0.01416		0.054	0.0592	0.0561	0.0467	0.039	0.0454	0.0403	0.0232		0.00409	0.00181	0.00515	0.00115	-0.00567	0.00098	-0.00382	-0.00904		1.67281e-05	3.2761e-06	2.65225e-05	1.3225e-06	3.21489e-05	9.604e-07	1.45924e-05	8.17216e-05
32.2	0.06084	0.06261	0.06205	0.04615	0.03778	0.04298	0.03503	0.00961		0.0535	0.0588	0.0561	0.0467	0.039	0.0453	0.0402	0.0232		0.00734	0.00381	0.00595	-0.00055	-0.00122	-0.00232	-0.00517	-0.01359		5.38756e-05	1.45161e-05	3.54025e-05	3.025e-07	1.4884e-06	5.3824e-06	2.67289e-05	0.000184688
32.4	0.05939	0.06466	0.05905	0.0488	0.03513	0.04193	0.03713	0.01246		0.0529	0.0583	0.0556	0.0465	0.0389	0.0451	0.0401	0.0233		0.00649	0.00636	0.00345	0.0023	-0.00377	-0.00317	-0.00297	-0.01084		4.21201e-05	4.04496e-05	1.19025e-05	5.29e-06	1.42129e-05	1.00489e-05	8.8209e-06	0.000117506
32.6	0.05629	0.05971	0.05825	0.04965	0.03783	0.03873	0.03878	0.01946		0.0526	0.0577	0.0552	0.0461	0.0387	0.0448	0.0399	0.0232		0.00369	0.00201	0.00305	0.00355	-0.00087	-0.00607	-0.00112	-0.00374		1.36161e-05	4.0401e-06	9.3025e-06	1.26025e-05	7.569e-07	3.68449e-05	1.2544e-06	1.39876e-05
32.8	0.05954	0.05881	0.0581	0.05185	0.03383	0.03753	0.03728	0.01731		0.0526	0.0578	0.0549	0.0456	0.0384	0.0446	0.0397	0.0232		0.00694	0.00101	0.0032	0.00625	-0.00457	-0.00707	-0.00242	-0.00589		4.81636e-05	1.0201e-06	1.024e-05	3.90625e-05	2.08849e-05	4.99849e-05	5.8564e-06	3.46921e-05
33	0.05949	0.06081	0.05775	0.0469	0.03518	0.04623	0.03553	0.01386		0.052	0.057	0.0546	0.0453	0.0381	0.0441	0.0395	0.0231		0.00749	0.00381	0.00315	0.0016	-0.00292	0.00213	-0.00397	-0.00924		5.61001e-05	1.45161e-05	9.9225e-06	2.56e-06	8.5264e-06	4.5369e-06	1.57609e-05	8.53776e-05
33.2	0.05784	0.06086	0.06155	0.0436	0.03723	0.04908	0.03418	0.01136		0.0521	0.057	0.0546	0.045	0.0379	0.0438	0.0392	0.023		0.00574	0.00386	0.00695	-0.0014	-0.00067	0.00528	-0.00502	-0.01164		3.29476e-05	1.48996e-05	4.83025e-05	1.96e-06	4.489e-07	2.78784e-05	2.52004e-05	0.00013549
33.4	0.05749	0.05826	0.0614	0.04975	0.03063	0.04433	0.03273	0.01271		0.0519	0.0568	0.0542	0.0448	0.0377	0.0436	0.039	0.023		0.00559	0.00146	0.0072	0.00495	-0.00707	0.00073	-0.00627	-0.01029		3.12481e-05	2.1316e-06	5.184e-05	2.45025e-05	4.99849e-05	5.329e-07	3.93129e-05	0.000105884
33.6	0.05869	0.05941	0.0599	0.0507	0.03303	0.04558	0.03343	0.01451		0.0515	0.0568	0.0542	0.0449	0.0375	0.0434	0.0389	0.0228		0.00719	0.00261	0.0057	0.0058	-0.00447	0.00218	-0.00547	-0.00829		5.16961e-05	6.8121e-06	3.249e-05	3.364e-05	1.99809e-05	4.7524e-06	2.99209e-05	6.87241e-05
33.8	0.05789	0.06196	0.0562	0.05495	0.03573	0.04623	0.03643	0.01201		0.0512	0.0566	0.054	0.0447	0.0374	0.0435	0.0388	0.0228		0.00669	0.00536	0.0022	0.01025	-0.00167	0.00273	-0.00237	-0.01079		4.47561e-05	2.87296e-05	4.84e-06	0.000105063	2.7889e-06	7.4529e-06	5.6169e-06	0.000116424
34	0.05869	0.06201	0.05495	0.053	0.03348	0.05058	0.03898	0.01141		0.0511	0.0567	0.054	0.0448	0.0371	0.0433	0.0387	0.0225		0.00759	0.00531	0.00095	0.0082	-0.00362	0.00728	0.00028	-0.01109		5.76081e-05	2.81961e-05	9.025e-07	6.724e-05	1.31044e-05	5.29984e-05	7.84e-08	0.000122988
34.2	0.05759	0.06296	0.05585	0.04575	0.03193	0.04323	0.03298	0.00926		0.0508	0.0566	0.0539	0.0445	0.0369	0.0433	0.0385	0.0225		0.00679	0.00636	0.00195	0.00125	-0.00497	-7e-05	-0.00552	-0.01324		4.61041e-05	4.04496e-05	3.8025e-06	1.5625e-06	2.47009e-05	4.9e-09	3.04704e-05	0.000175298
34.4	0.05779	0.06546	0.05825	0.0451	0.03473	0.04303	0.03703	0.00816		0.0507	0.0565	0.0538	0.0443	0.0367	0.0432	0.0383	0.0224		0.00709	0.00896	0.00445	0.0008	-0.00197	-0.00017	-0.00127	-0.01424		5.02681e-05	8.02816e-05	1.98025e-05	6.4e-07	3.8809e-06	2.89e-08	1.6129e-06	0.000202778
34.6	0.05919	0.06406	0.0602	0.0392	0.02983	0.04383	0.03423	0.01901		0.0506	0.0561	0.0535	0.0442	0.0365	0.0431	0.0381	0.0223		0.00859	0.00796	0.0067	-0.005	-0.00667	0.00073	-0.00387	-0.00329		7.37881e-05	6.33616e-05	4.489e-05	2.5e-05	4.44889e-05	5.329e-07	1.49769e-05	1.08241e-05
34.8	0.05539	0.06166	0.06055	0.04535	0.02943	0.04098	0.03433	0.01596		0.0505	0.0562	0.0532	0.0441	0.0364	0.0428	0.0379	0.0223		0.00489	0.00546	0.00735	0.00125	-0.00697	-0.00182	-0.00357	-0.00634		2.39121e-05	2.98116e-05	5.40225e-05	1.5625e-06	4.85809e-05	3.3124e-06	1.27449e-05	4.01956e-05
35	0.05629	0.06231	0.0587	0.0472	0.04018	0.04173	0.03213	0.01416		0.0508	0.0557	0.053	0.0439	0.0363	0.0426	0.0378	0.022		0.00549	0.00661	0.0057	0.0033	0.00388	-0.00087	-0.00567	-0.00784		3.01401e-05	4.36921e-05	3.249e-05	1.089e-05	1.50544e-05	7.569e-07	3.21489e-05	6.14656e-05
35.2	0.05574	0.06156	0.056	0.0483	0.03688	0.04508	0.03708	0.01181		0.0511	0.0557	0.053	0.0437	0.0363	0.0424	0.0377	0.0221		0.00464	0.00586	0.003	0.0046	0.00058	0.00268	-0.00062	-0.01029		2.15296e-05	3.43396e-05	9e-06	2.116e-05	3.364e-07	7.1824e-06	3.844e-07	0.000105884
35.4	0.05394	0.06031	0.05325	0.05325	0.03668	0.04513	0.03883	0.00906		0.0508	0.0556	0.0527	0.0435	0.0362	0.0422	0.0377	0.0221		0.00314	0.00471	0.00055	0.00975	0.00048	0.00293	0.00113	-0.01304		9.8596e-06	2.21841e-05	3.025e-07	9.50625e-05	2.304e-07	8.5849e-06	1.2769e-06	0.000170042
35.6	0.05269	0.06021	0.05245	0.0504	0.03338	0.04743	0.03358	0.00841		0.0509	0.0555	0.0528	0.0435	0.0361	0.0422	0.0376	0.022		0.00179	0.00471	-0.00035	0.0069	-0.00272	0.00523	-0.00402	-0.01359		3.2041e-06	2.21841e-05	1.225e-07	4.761e-05	7.3984e-06	2.73529e-05	1.61604e-05	0.000184688
35.8	0.05499	0.05776	0.0578	0.0475	0.03283	0.04673	0.03438	0.01136		0.0509	0.0551	0.0528	0.0434	0.036	0.0422	0.0376	0.0219		0.00409	0.00266	0.005	0.0041	-0.00317	0.00453	-0.00322	-0.01054		1.67281e-05	7.0756e-06	2.5e-05	1.681e-05	1.00489e-05	2.05209e-05	1.03684e-05	0.000111092
36	0.05424	0.05836	0.06235	0.04125	0.03028	0.04493	0.03118	0.01271		0.0509	0.0548	0.0527	0.0435	0.036	0.0421	0.0375	0.0218		0.00334	0.00356	0.00965	-0.00225	-0.00572	0.00283	-0.00632	-0.00909		1.11556e-05	1.26736e-05	9.31225e-05	5.0625e-06	3.27184e-05	8.0089e-06	3.99424e-05	8.26281e-05
36.2	0.05639	0.05996	0.0619	0.04245	0.02933	0.04213	0.03298	0.01201		0.0504	0.0545	0.0525	0.0437	0.036	0.0422	0.0374	0.022		0.00599	0.00546	0.0094	-0.00125	-0.00667	-7e-05	-0.00442	-0.00999		3.58801e-05	2.98116e-05	8.836e-05	1.5625e-06	4.44889e-05	4.9e-09	1.95364e-05	9.98001e-05
36.4	0.05639	0.05716	0.05645	0.04335	0.03388	0.04038	0.03208	0.01096		0.0502	0.0544	0.0522	0.0438	0.0361	0.0421	0.0374	0.022		0.00619	0.00276	0.00425	-0.00045	-0.00222	-0.00172	-0.00532	-0.01104		3.83161e-05	7.6176e-06	1.80625e-05	2.025e-07	4.9284e-06	2.9584e-06	2.83024e-05	0.000121882
36.6	0.05454	0.05821	0.0542	0.0417	0.03768	0.03943	0.03483	0.00936		0.05	0.0538	0.052	0.0439	0.0361	0.0419	0.0373	0.0219		0.00454	0.00441	0.0022	-0.0022	0.00158	-0.00247	-0.00247	-0.01254		2.06116e-05	1.94481e-05	4.84e-06	4.84e-06	2.4964e-06	6.1009e-06	6.1009e-06	0.000157252
36.8	0.05514	0.06226	0.05205	0.0453	0.04013	0.03923	0.02898	0.01001		0.0498	0.0537	0.052	0.0439	0.0361	0.0417	0.0372	0.022		0.00534	0.00856	5e-05	0.0014	0.00403	-0.00247	-0.00822	-0.01199		2.85156e-05	7.32736e-05	2.5e-09	1.96e-06	1.62409e-05	6.1009e-06	6.75684e-05	0.00014376
37	0.05299	0.06066	0.05385	0.04555	0.03893	0.04408	0.03513	0.01616		0.0492	0.0533	0.0518	0.0437	0.036	0.0415	0.037	0.0221		0.00379	0.00736	0.00205	0.00185	0.00293	0.00258	-0.00187	-0.00594		1.43641e-05	5.41696e-05	4.2025e-06	3.4225e-06	8.5849e-06	6.6564e-06	3.4969e-06	3.52836e-05
37.2	0.05514	0.05941	0.0544	0.04455	0.02963	0.04338	0.03658	0.01411		0.0492	0.0535	0.0519	0.0438	0.0358	0.0414	0.0369	0.022		0.00594	0.00591	0.0025	0.00075	-0.00617	0.00198	-0.00032	-0.00789		3.52836e-05	3.49281e-05	6.25e-06	5.625e-07	3.80689e-05	3.9204e-06	1.024e-07	6.22521e-05
37.4	0.05389	0.05621	0.0565	0.05015	0.03318	0.04563	0.03578	0.01136		0.0487	0.0535	0.0517	0.0436	0.0355	0.0414	0.0367	0.0219		0.00519	0.00271	0.0048	0.00655	-0.00232	0.00423	-0.00092	-0.01054		2.69361e-05	7.3441e-06	2.304e-05	4.29025e-05	5.3824e-06	1.78929e-05	8.464e-07	0.000111092
37.6	0.05264	0.05581	0.0569	0.0482	0.03053	0.04438	0.03398	0.00881		0.0486	0.053	0.0515	0.0436	0.0352	0.0415	0.0365	0.0217		0.00404	0.00281	0.0054	0.0046	-0.00467	0.00288	-0.00252	-0.01289		1.63216e-05	7.8961e-06	2.916e-05	2.116e-05	2.18089e-05	8.2944e-06	6.3504e-06	0.000166152
37.8	0.05324	0.05841	0.0552	0.04585	0.03163	0.03973	0.03353	0.01061		0.0483	0.0532	0.0513	0.0435	0.0349	0.0414	0.0363	0.0218		0.00494	0.00521	0.0039	0.00235	-0.00327	-0.00167	-0.00277	-0.01119		2.44036e-05	2.71441e-05	1.521e-05	5.5225e-06	1.06929e-05	2.7889e-06	7.6729e-06	0.000125216
38	0.05459	0.06056	0.0551	0.03885	0.03138	0.03943	0.03273	0.01031		0.0478	0.0532	0.0509	0.0434	0.0347	0.0413	0.0361	0.0217		0.00679	0.00736	0.0042	-0.00455	-0.00332	-0.00187	-0.00337	-0.01139		4.61041e-05	5.41696e-05	1.764e-05	2.07025e-05	1.10224e-05	3.4969e-06	1.13569e-05	0.000129732
38.2	0.05464	0.05766	0.0474	0.04325	0.03253	0.03873	0.03083	0.01721		0.0479	0.0528	0.0511	0.0431	0.0344	0.0412	0.0359	0.0216		0.00674	0.00486	-0.0037	0.00015	-0.00187	-0.00247	-0.00507	-0.00439		4.54276e-05	2.36196e-05	1.369e-05	2.25e-08	3.4969e-06	6.1009e-06	2.57049e-05	1.92721e-05
38.4	0.05509	0.05761	0.04795	0.04425	0.03283	0.04013	0.02953	0.01671		0.0476	0.0526	0.0509	0.0429	0.0342	0.0411	0.0357	0.0214		0.00749	0.00501	-0.00295	0.00135	-0.00137	-0.00097	-0.00617	-0.00469		5.61001e-05	2.51001e-05	8.7025e-06	1.8225e-06	1.8769e-06	9.409e-07	3.80689e-05	2.19961e-05
38.6	0.05259	0.05896	0.05305	0.03845	0.03343	0.04008	0.03128	0.01406		0.0474	0.0524	0.0507	0.0427	0.034	0.0409	0.0355	0.0214		0.00519	0.00656	0.00235	-0.00425	-0.00057	-0.00082	-0.00422	-0.00734		2.69361e-05	4.30336e-05	5.5225e-06	1.80625e-05	3.249e-07	6.724e-07	1.78084e-05	5.38756e-05
38.8	0.05104	0.05536	0.05635	0.04335	0.02248	0.04188	0.03273	0.01081		0.0472	0.0523	0.0505	0.0424	0.0339	0.0407	0.0354	0.0212		0.00384	0.00306	0.00585	0.00095	-0.01142	0.00118	-0.00267	-0.01039		1.47456e-05	9.3636e-06	3.42225e-05	9.025e-07	0.000130416	1.3924e-06	7.1289e-06	0.000107952
39	0.05384	0.05586	0.05965	0.0471	0.02468	0.03828	0.03483	0.01076		0.0469	0.0522	0.0501	0.0421	0.0338	0.0404	0.0354	0.0211		0.00694	0.00366	0.00955	0.005	-0.00912	-0.00212	-0.00057	-0.01034		4.81636e-05	1.33956e-05	9.12025e-05	2.5e-05	8.31744e-05	4.4944e-06	3.249e-07	0.000106916
39.2	0.05314	0.05601	0.0566	0.055	0.02548	0.03953	0.03338	0.01131		0.0469	0.0517	0.05	0.0418	0.0338	0.0401	0.0352	0.0211		0.00624	0.00431	0.0066	0.0132	-0.00832	-0.00057	-0.00182	-0.00979		3.89376e-05	1.85761e-05	4.356e-05	0.00017424	6.92224e-05	3.249e-07	3.3124e-06	9.58441e-05
39.4	0.05264	0.05376	0.05305	0.04695	0.02458	0.04083	0.02838	0.01211		0.0468	0.0515	0.0498	0.0415	0.0337	0.0399	0.0352	0.021		0.00584	0.00226	0.00325	0.00545	-0.00912	0.00093	-0.00682	-0.00889		3.41056e-05	5.1076e-06	1.05625e-05	2.97025e-05	8.31744e-05	8.649e-07	4.65124e-05	7.90321e-05
39.6	0.04919	0.05741	0.0511	0.0414	0.02783	0.04243	0.02928	0.01211		0.0466	0.0513	0.0497	0.0412	0.0337	0.0398	0.0352	0.0209		0.00259	0.00611	0.0014	0.0002	-0.00587	0.00263	-0.00592	-0.00879		6.7081e-06	3.73321e-05	1.96e-06	4e-08	3.44569e-05	6.9169e-06	3.50464e-05	7.72641e-05
39.8	0.05139	0.05711	0.04925	0.0439	0.02928	0.03863	0.03238	0.00931		0.0466	0.0511	0.0496	0.041	0.0335	0.0397	0.0352	0.0209		0.00479	0.00601	-0.00035	0.0029	-0.00422	-0.00107	-0.00282	-0.01159		2.29441e-05	3.61201e-05	1.225e-07	8.41e-06	1.78084e-05	1.1449e-06	7.9524e-06	0.000134328
40	0.05084	0.05451	0.05135	0.0416	0.03228	0.04173	0.03143	0.00981		0.0467	0.0508	0.0495	0.0408	0.0334	0.0395	0.0351	0.0209		0.00414	0.00371	0.00185	0.0008	-0.00112	0.00223	-0.00367	-0.01109		1.71396e-05	1.37641e-05	3.4225e-06	6.4e-07	1.2544e-06	4.9729e-06	1.34689e-05	0.000122988
40.2	0.04924	0.05616	0.05395	0.0419	0.03098	0.03753	0.03103	0.01376		0.0465	0.0506	0.0494	0.0407	0.0333	0.0393	0.0349	0.0208		0.00274	0.00556	0.00455	0.0012	-0.00232	-0.00177	-0.00387	-0.00704		7.5076e-06	3.09136e-05	2.07025e-05	1.44e-06	5.3824e-06	3.1329e-06	1.49769e-05	4.95616e-05
40.4	0.05214	0.05481	0.05675	0.044	0.03183	0.03878	0.03193	0.01396		0.0464	0.0505	0.0492	0.0406	0.0332	0.0392	0.0348	0.0209		0.00574	0.00431	0.00755	0.0034	-0.00137	-0.00042	-0.00287	-0.00694		3.29476e-05	1.85761e-05	5.70025e-05	1.156e-05	1.8769e-06	1.764e-07	8.2369e-06	4.81636e-05
40.6	0.04819	0.05431	0.0562	0.04355	0.03003	0.03918	0.03228	0.01481		0.0462	0.0503	0.049	0.0405	0.0331	0.0391	0.0347	0.0208		0.00199	0.00401	0.0072	0.00305	-0.00307	8e-05	-0.00242	-0.00599		3.9601e-06	1.60801e-05	5.184e-05	9.3025e-06	9.4249e-06	6.4e-09	5.8564e-06	3.58801e-05
40.8	0.04769	0.05531	0.0521	0.04265	0.02873	0.03783	0.02978	0.01001		0.0459	0.0498	0.049	0.0404	0.033	0.0389	0.0346	0.0207		0.00179	0.00551	0.0031	0.00225	-0.00427	-0.00107	-0.00482	-0.01069		3.2041e-06	3.03601e-05	9.61e-06	5.0625e-06	1.82329e-05	1.1449e-06	2.32324e-05	0.000114276
41	0.04974	0.05426	0.05115	0.0411	0.02733	0.03723	0.02953	0.00726		0.0456	0.0496	0.0488	0.0402	0.0329	0.0387	0.0345	0.0206		0.00414	0.00466	0.00235	0.0009	-0.00557	-0.00147	-0.00497	-0.01334		1.71396e-05	2.17156e-05	5.5225e-06	8.1e-07	3.10249e-05	2.1609e-06	2.47009e-05	0.000177956
41.2	0.04819	0.05396	0.049	0.0409	0.03198	0.03843	0.03073	0.00751		0.0453	0.0493	0.0486	0.04	0.0327	0.0385	0.0343	0.0206		0.00289	0.00466	0.0004	0.0009	-0.00072	-7e-05	-0.00357	-0.01309		8.3521e-06	2.17156e-05	1.6e-07	8.1e-07	5.184e-07	4.9e-09	1.27449e-05	0.000171348
41.4	0.05029	0.05276	0.04935	0.0388	0.02698	0.03703	0.03208	0.01116		0.0451	0.0489	0.0484	0.0399	0.0325	0.0384	0.0341	0.0205		0.00519	0.00386	0.00095	-0.0011	-0.00552	-0.00137	-0.00202	-0.00934		2.69361e-05	1.48996e-05	9.025e-07	1.21e-06	3.04704e-05	1.8769e-06	4.0804e-06	8.72356e-05
41.6	0.04959	0.05296	0.05065	0.0386	0.02923	0.03738	0.02848	0.01136		0.0446	0.0486	0.0482	0.0397	0.0323	0.0382	0.0339	0.0205		0.00499	0.00436	0.00245	-0.0011	-0.00307	-0.00082	-0.00542	-0.00914		2.49001e-05	1.90096e-05	6.0025e-06	1.21e-06	9.4249e-06	6.724e-07	2.93764e-05	8.35396e-05
41.8	0.04749	0.05171	0.05215	0.03705	0.02728	0.03913	0.02818	0.00976		0.0446	0.0484	0.0479	0.0395	0.0321	0.038	0.0337	0.0204		0.00289	0.00331	0.00425	-0.00245	-0.00482	0.00113	-0.00552	-0.01064		8.3521e-06	1.09561e-05	1.80625e-05	6.0025e-06	2.32324e-05	1.2769e-06	3.04704e-05	0.00011321
42	0.04894	0.05311	0.05355	0.041	0.02618	0.03608	0.02908	0.00941		0.0442	0.0479	0.0477	0.0393	0.0318	0.0378	0.0334	0.0203		0.00474	0.00521	0.00585	0.0017	-0.00562	-0.00172	-0.00432	-0.01089		2.24676e-05	2.71441e-05	3.42225e-05	2.89e-06	3.15844e-05	2.9584e-06	1.86624e-05	0.000118592
42.2	0.04619	0.05396	0.05175	0.04185	0.03158	0.03663	0.03038	0.00876		0.0439	0.0475	0.0475	0.0391	0.0316	0.0377	0.0333	0.0202		0.00229	0.00646	0.00425	0.00275	-2e-05	-0.00107	-0.00292	-0.01144		5.2441e-06	4.17316e-05	1.80625e-05	7.5625e-06	4e-10	1.1449e-06	8.5264e-06	0.000130874
42.4	0.04959	0.05606	0.0507	0.04045	0.02878	0.03888	0.03053	0.00996		0.0437	0.047	0.0472	0.039	0.0314	0.0375	0.0331	0.0201		0.00589	0.00906	0.0035	0.00145	-0.00262	0.00138	-0.00257	-0.01014		3.46921e-05	8.20836e-05	1.225e-05	2.1025e-06	6.8644e-06	1.9044e-06	6.6049e-06	0.00010282
42.6	0.04819	0.05531	0.05005	0.0381	0.02698	0.03883	0.03068	0.00851		0.0433	0.0465	0.0468	0.0388	0.0312	0.0374	0.0329	0.02		0.00489	0.00881	0.00325	-0.0007	-0.00422	0.00143	-0.00222	-0.01149		2.39121e-05	7.76161e-05	1.05625e-05	4.9e-07	1.78084e-05	2.0449e-06	4.9284e-06	0.00013202
42.8	0.04599	0.05246	0.0485	0.03855	0.02783	0.03848	0.03108	0.00956		0.0428	0.0459	0.0465	0.0386	0.031	0.0372	0.0328	0.02		0.00319	0.00656	0.002	-5e-05	-0.00317	0.00128	-0.00172	-0.01044		1.01761e-05	4.30336e-05	4e-06	2.5e-09	1.00489e-05	1.6384e-06	2.9584e-06	0.000108994
43	0.04864	0.05051	0.0484	0.0369	0.02498	0.03823	0.02843	0.00856		0.0424	0.0458	0.0462	0.0383	0.0308	0.037	0.0326	0.0199		0.00624	0.00471	0.0022	-0.0014	-0.00582	0.00123	-0.00417	-0.01134		3.89376e-05	2.21841e-05	4.84e-06	1.96e-06	3.38724e-05	1.5129e-06	1.73889e-05	0.000128596
43.2	0.04649	0.05156	0.05035	0.03665	0.02758	0.03773	0.02968	0.00916		0.042	0.0454	0.046	0.0381	0.0306	0.0367	0.0325	0.0199		0.00449	0.00616	0.00435	-0.00145	-0.00302	0.00103	-0.00282	-0.01074		2.01601e-05	3.79456e-05	1.89225e-05	2.1025e-06	9.1204e-06	1.0609e-06	7.9524e-06	0.000115348
43.4	0.04749	0.05216	0.05365	0.036	0.02453	0.03543	0.02988	0.01016		0.0417	0.0453	0.0457	0.0377	0.0304	0.0364	0.0322	0.0198		0.00579	0.00686	0.00795	-0.0017	-0.00587	-0.00097	-0.00232	-0.00964		3.35241e-05	4.70596e-05	6.32025e-05	2.89e-06	3.44569e-05	9.409e-07	5.3824e-06	9.29296e-05
43.6	0.04729	0.05231	0.0527	0.03435	0.02638	0.03433	0.02868	0.01291		0.0414	0.045	0.0455	0.0374	0.0301	0.0361	0.032	0.0197		0.00589	0.00731	0.0072	-0.00305	-0.00372	-0.00177	-0.00332	-0.00679		3.46921e-05	5.34361e-05	5.184e-05	9.3025e-06	1.38384e-05	3.1329e-06	1.10224e-05	4.61041e-05
43.8	0.04729	0.05266	0.0528	0.03725	0.02298	0.03433	0.02828	0.01031		0.0413	0.0448	0.0453	0.0371	0.0298	0.0358	0.0318	0.0196		0.00599	0.00786	0.0075	0.00015	-0.00682	-0.00147	-0.00352	-0.00929		3.58801e-05	6.17796e-05	5.625e-05	2.25e-08	4.65124e-05	2.1609e-06	1.23904e-05	8.63041e-05
44	0.04649	0.05086	0.0493	0.03915	0.02158	0.03593	0.02783	0.00956		0.0411	0.0446	0.0451	0.0369	0.0296	0.0356	0.0315	0.0195		0.00539	0.00626	0.0042	0.00225	-0.00802	0.00033	-0.00367	-0.00994		2.90521e-05	3.91876e-05	1.764e-05	5.0625e-06	6.43204e-05	1.089e-07	1.34689e-05	9.88036e-05
44.2	0.04674	0.05146	0.04805	0.03755	0.02343	0.03593	0.02998	0.00706		0.0409	0.0445	0.0448	0.0367	0.0293	0.0355	0.0313	0.0194		0.00584	0.00696	0.00325	0.00085	-0.00587	0.00043	-0.00132	-0.01234		3.41056e-05	4.84416e-05	1.05625e-05	7.225e-07	3.44569e-05	1.849e-07	1.7424e-06	0.000152276
44.4	0.04719	0.05261	0.04565	0.03615	0.02563	0.03548	0.03133	0.00961		0.0409	0.0443	0.0447	0.0366	0.0291	0.0353	0.0311	0.0193		0.00629	0.00831	0.00095	-0.00045	-0.00347	0.00018	0.00023	-0.00969		3.95641e-05	6.90561e-05	9.025e-07	2.025e-07	1.20409e-05	3.24e-08	5.29e-08	9.38961e-05
44.6	0.04729	0.05216	0.04615	0.0371	0.02828	0.03678	0.02868	0.00986		0.0406	0.0441	0.0445	0.0365	0.0289	0.0353	0.0309	0.0192		0.00669	0.00806	0.00165	0.0006	-0.00062	0.00148	-0.00222	-0.00934		4.47561e-05	6.49636e-05	2.7225e-06	3.6e-07	3.844e-07	2.1904e-06	4.9284e-06	8.72356e-05
44.8	0.04609	0.04986	0.04985	0.0359	0.02888	0.03453	0.02768	0.01051		0.0404	0.0439	0.0445	0.0364	0.0287	0.0351	0.0308	0.0191		0.00569	0.00596	0.00535	-0.0005	0.00018	-0.00057	-0.00312	-0.00859		3.23761e-05	3.55216e-05	2.86225e-05	2.5e-07	3.24e-08	3.249e-07	9.7344e-06	7.37881e-05
45	0.04699	0.04971	0.05325	0.0371	0.02798	0.03543	0.02808	0.01136		0.0403	0.0439	0.0444	0.0362	0.0285	0.035	0.0306	0.019		0.00669	0.00581	0.00885	0.0009	-0.00052	0.00043	-0.00252	-0.00764		4.47561e-05	3.37561e-05	7.83225e-05	8.1e-07	2.704e-07	1.849e-07	6.3504e-06	5.83696e-05
45.2	0.04599	0.05076	0.0523	0.0377	0.02728	0.03353	0.02513	0.00841		0.0399	0.0437	0.0442	0.036	0.0283	0.0349	0.0304	0.019		0.00609	0.00706	0.0081	0.0017	-0.00102	-0.00137	-0.00527	-0.01059		3.70881e-05	4.98436e-05	6.561e-05	2.89e-06	1.0404e-06	1.8769e-06	2.77729e-05	0.000112148
45.4	0.04659	0.05291	0.0505	0.0341	0.02363	0.03453	0.02718	0.00736		0.0398	0.0437	0.0441	0.0358	0.0282	0.0347	0.0303	0.0188		0.00679	0.00921	0.0064	-0.0017	-0.00457	-0.00017	-0.00312	-0.01144		4.61041e-05	8.48241e-05	4.096e-05	2.89e-06	2.08849e-05	2.89e-08	9.7344e-06	0.000130874
45.6	0.04589	0.05141	0.0507	0.03605	0.02418	0.03353	0.02683	0.00771		0.0399	0.0436	0.0439	0.0355	0.0281	0.0345	0.0301	0.0188		0.00599	0.00781	0.0068	0.00055	-0.00392	-0.00097	-0.00327	-0.01109		3.58801e-05	6.09961e-05	4.624e-05	3.025e-07	1.53664e-05	9.409e-07	1.06929e-05	0.000122988
45.8	0.04404	0.05271	0.0466	0.0353	0.02283	0.03348	0.02963	0.00861		0.0399	0.0432	0.0439	0.0354	0.028	0.0343	0.03	0.0189		0.00414	0.00951	0.0027	-0.0001	-0.00517	-0.00082	-0.00037	-0.01029		1.71396e-05	9.04401e-05	7.29e-06	1e-08	2.67289e-05	6.724e-07	1.369e-07	0.000105884
46	0.04539	0.05376	0.04435	0.03335	0.02278	0.03633	0.02643	0.01136		0.0399	0.0432	0.0438	0.0352	0.028	0.0341	0.0299	0.0187		0.00549	0.01056	0.00055	-0.00185	-0.00522	0.00223	-0.00347	-0.00734		3.01401e-05	0.000111514	3.025e-07	3.4225e-06	2.72484e-05	4.9729e-06	1.20409e-05	5.38756e-05
46.2	0.04674	0.05201	0.04465	0.0328	0.02378	0.03248	0.02758	0.00981		0.0399	0.043	0.0436	0.0351	0.0279	0.0339	0.0298	0.0187		0.00684	0.00901	0.00105	-0.0023	-0.00412	-0.00142	-0.00222	-0.00889		4.67856e-05	8.11801e-05	1.1025e-06	5.29e-06	1.69744e-05	2.0164e-06	4.9284e-06	7.90321e-05
46.4	0.04624	0.05291	0.04875	0.0358	0.02723	0.03363	0.03103	0.00736		0.04	0.0431	0.0436	0.035	0.0278	0.0338	0.0297	0.0185		0.00624	0.00981	0.00515	0.0008	-0.00057	-0.00017	0.00133	-0.01114		3.89376e-05	9.62361e-05	2.65225e-05	6.4e-07	3.249e-07	2.89e-08	1.7689e-06	0.0001241
46.6	0.04724	0.05141	0.0517	0.0466	0.02863	0.03508	0.02793	0.01066		0.0399	0.0433	0.0436	0.0349	0.0278	0.0337	0.0296	0.0186		0.00734	0.00811	0.0081	0.0117	0.00083	0.00138	-0.00167	-0.00794		5.38756e-05	6.57721e-05	6.561e-05	0.00013689	6.889e-07	1.9044e-06	2.7889e-06	6.30436e-05
46.8	0.04604	0.05051	0.0501	0.04465	0.02538	0.03683	0.02843	0.01001		0.04	0.0434	0.0436	0.0348	0.0277	0.0336	0.0295	0.0186		0.00604	0.00711	0.0065	0.00985	-0.00232	0.00323	-0.00107	-0.00859		3.64816e-05	5.05521e-05	4.225e-05	9.70225e-05	5.3824e-06	1.04329e-05	1.1449e-06	7.37881e-05
47	0.04504	0.05151	0.04935	0.0386	0.02493	0.03528	0.02653	0.00871		0.0402	0.0435	0.0438	0.0348	0.0276	0.0336	0.0294	0.0185		0.00484	0.00801	0.00555	0.0038	-0.00267	0.00168	-0.00287	-0.00979		2.34256e-05	6.41601e-05	3.08025e-05	1.444e-05	7.1289e-06	2.8224e-06	8.2369e-06	9.58441e-05
47.2	0.04474	0.05021	0.0471	0.03695	0.02658	0.03478	0.02498	0.00856		0.0401	0.0432	0.0439	0.0348	0.0275	0.0335	0.0293	0.0184		0.00464	0.00701	0.0032	0.00215	-0.00092	0.00128	-0.00432	-0.00984		2.15296e-05	4.91401e-05	1.024e-05	4.6225e-06	8.464e-07	1.6384e-06	1.86624e-05	9.68256e-05
47.4	0.04339	0.05036	0.0447	0.03415	0.02898	0.03458	0.02648	0.00771		0.0401	0.0427	0.0439	0.0348	0.0274	0.0335	0.0292	0.0183		0.00329	0.00766	0.0008	-0.00065	0.00158	0.00108	-0.00272	-0.01059		1.08241e-05	5.86756e-05	6.4e-07	4.225e-07	2.4964e-06	1.1664e-06	7.3984e-06	0.000112148
47.6	0.04449	0.04966	0.04425	0.03365	0.03108	0.03538	0.02823	0.00836		0.0399	0.0422	0.0438	0.0348	0.0273	0.0335	0.0291	0.0184		0.00459	0.00746	0.00045	-0.00115	0.00378	0.00188	-0.00087	-0.01004		2.10681e-05	5.56516e-05	2.025e-07	1.3225e-06	1.42884e-05	3.5344e-06	7.569e-07	0.000100802
47.8	0.04344	0.05141	0.04425	0.03575	0.03043	0.03278	0.02813	0.00731		0.0395	0.0418	0.0435	0.0348	0.0273	0.0335	0.029	0.0185		0.00394	0.00961	0.00075	0.00095	0.00313	-0.00072	-0.00087	-0.01119		1.55236e-05	9.23521e-05	5.625e-07	9.025e-07	9.7969e-06	5.184e-07	7.569e-07	0.000125216
48	0.04314	0.05241	0.04545	0.038	0.02963	0.03303	0.02708	0.00756		0.0391	0.0414	0.0432	0.0347	0.0273	0.0334	0.0289	0.0185		0.00404	0.01101	0.00225	0.0033	0.00233	-0.00037	-0.00182	-0.01094		1.63216e-05	0.00012122	5.0625e-06	1.089e-05	5.4289e-06	1.369e-07	3.3124e-06	0.000119684
48.2	0.04269	0.04981	0.0487	0.0374	0.02923	0.03248	0.02798	0.00896		0.0385	0.0412	0.0428	0.0346	0.0272	0.0331	0.0288	0.0183		0.00419	0.00861	0.0059	0.0028	0.00203	-0.00062	-0.00082	-0.00934		1.75561e-05	7.41321e-05	3.481e-05	7.84e-06	4.1209e-06	3.844e-07	6.724e-07	8.72356e-05
48.4	0.04459	0.05231	0.04615	0.0396	0.02468	0.03468	0.02628	0.00896		0.0384	0.0414	0.0425	0.0343	0.0271	0.0329	0.0288	0.0182		0.00619	0.01091	0.00365	0.0053	-0.00242	0.00178	-0.00252	-0.00924		3.83161e-05	0.000119028	1.33225e-05	2.809e-05	5.8564e-06	3.1684e-06	6.3504e-06	8.53776e-05
48.6	0.04489	0.05211	0.04795	0.0353	0.02278	0.03363	0.02608	0.01151		0.0384	0.0413	0.0424	0.0339	0.0269	0.0326	0.0286	0.0182		0.00649	0.01081	0.00555	0.0014	-0.00412	0.00103	-0.00252	-0.00669		4.21201e-05	0.000116856	3.08025e-05	1.96e-06	1.69744e-05	1.0609e-06	6.3504e-06	4.47561e-05
48.8	0.04354	0.04961	0.0485	0.03385	0.02673	0.03263	0.02638	0.00766		0.0384	0.0416	0.0424	0.0337	0.0267	0.0323	0.0285	0.0183		0.00514	0.00801	0.0061	0.00015	3e-05	0.00033	-0.00212	-0.01064		2.64196e-05	6.41601e-05	3.721e-05	2.25e-08	9e-10	1.089e-07	4.4944e-06	0.00011321
49	0.04274	0.05016	0.04595	0.03295	0.02728	0.03193	0.02558	0.00691		0.0384	0.0414	0.0425	0.0335	0.0264	0.0321	0.0282	0.0183		0.00434	0.00876	0.00345	-0.00055	0.00088	-0.00017	-0.00262	-0.01139		1.88356e-05	7.67376e-05	1.19025e-05	3.025e-07	7.744e-07	2.89e-08	6.8644e-06	0.000129732
49.2	0.04394	0.05191	0.0443	0.03685	0.03073	0.03128	0.02598	0.00726		0.0385	0.0415	0.0425	0.0335	0.0262	0.032	0.028	0.0181		0.00544	0.01041	0.0018	0.00335	0.00453	-0.00072	-0.00202	-0.01084		2.95936e-05	0.000108368	3.24e-06	1.12225e-05	2.05209e-05	5.184e-07	4.0804e-06	0.000117506
49.4	0.04344	0.05251	0.0434	0.0367	0.02888	0.03313	0.02588	0.01131		0.0384	0.0414	0.0425	0.0336	0.026	0.0321	0.0278	0.0179		0.00504	0.01111	0.0009	0.0031	0.00288	0.00103	-0.00192	-0.00659		2.54016e-05	0.000123432	8.1e-07	9.61e-06	8.2944e-06	1.0609e-06	3.6864e-06	4.34281e-05
49.6	0.04304	0.05251	0.0433	0.0361	0.02738	0.03453	0.02753	0.01041		0.0383	0.0411	0.0425	0.0339	0.0259	0.0323	0.0276	0.0179		0.00474	0.01141	0.0008	0.0022	0.00148	0.00223	-7e-05	-0.00749		2.24676e-05	0.000130188	6.4e-07	4.84e-06	2.1904e-06	4.9729e-06	4.9e-09	5.61001e-05
49.8	0.04249	0.05171	0.04445	0.03975	0.02538	0.03398	0.02883	0.00971		0.038	0.041	0.0423	0.034	0.0258	0.0324	0.0276	0.0179		0.00449	0.01071	0.00215	0.00575	-0.00042	0.00158	0.00123	-0.00819		2.01601e-05	0.000114704	4.6225e-06	3.30625e-05	1.764e-07	2.4964e-06	1.5129e-06	6.70761e-05
50	0.04239	0.05001	0.045	0.0376	0.02483	0.03468	0.02748	0.00906		0.0376	0.041	0.0422	0.034	0.0258	0.0325	0.0276	0.0178		0.00479	0.00901	0.0028	0.0036	-0.00097	0.00218	-0.00012	-0.00874		2.29441e-05	8.11801e-05	7.84e-06	1.296e-05	9.409e-07	4.7524e-06	1.44e-08	7.63876e-05
50.2	0.04259	0.05041	0.04595	0.0335	0.02613	0.03388	0.02698	0.00796		0.0372	0.0409	0.042	0.0339	0.0257	0.0325	0.0276	0.0178		0.00539	0.00951	0.00395	-0.0004	0.00043	0.00138	-0.00062	-0.00984		2.90521e-05	9.04401e-05	1.56025e-05	1.6e-07	1.849e-07	1.9044e-06	3.844e-07	9.68256e-05
50.4	0.04254	0.04936	0.04655	0.0344	0.02563	0.03033	0.02438	0.00691		0.037	0.0409	0.0419	0.0337	0.0256	0.0323	0.0276	0.0177		0.00554	0.00846	0.00465	0.0007	3e-05	-0.00197	-0.00322	-0.01079		3.06916e-05	7.15716e-05	2.16225e-05	4.9e-07	9e-10	3.8809e-06	1.03684e-05	0.000116424
50.6	0.04204	0.04721	0.0469	0.03245	0.02723	0.03223	0.02578	0.00696		0.037	0.0409	0.0418	0.0332	0.0255	0.0321	0.0276	0.0176		0.00504	0.00631	0.0051	-0.00075	0.00173	0.00013	-0.00182	-0.01064		2.54016e-05	3.98161e-05	2.601e-05	5.625e-07	2.9929e-06	1.69e-08	3.3124e-06	0.00011321
50.8	0.04019	0.04906	0.0447	0.03315	0.02708	0.03233	0.02558	0.01161		0.0371	0.0411	0.0417	0.0329	0.0255	0.0318	0.0275	0.0177		0.00309	0.00796	0.003	0.00025	0.00158	0.00053	-0.00192	-0.00609		9.5481e-06	6.33616e-05	9e-06	6.25e-08	2.4964e-06	2.809e-07	3.6864e-06	3.70881e-05
51	0.04139	0.05221	0.0451	0.03345	0.02838	0.03128	0.02553	0.00841		0.0373	0.041	0.0416	0.0326	0.0254	0.0315	0.0274	0.0177		0.00409	0.01121	0.0035	0.00085	0.00298	-0.00022	-0.00187	-0.00929		1.67281e-05	0.000125664	1.225e-05	7.225e-07	8.8804e-06	4.84e-08	3.4969e-06	8.63041e-05
51.2	0.04239	0.05371	0.04835	0.03225	0.02573	0.03063	0.02433	0.00726		0.0375	0.0408	0.0416	0.0324	0.0253	0.0312	0.0273	0.0177		0.00489	0.01291	0.00675	-0.00015	0.00043	-0.00057	-0.00297	-0.01044		2.39121e-05	0.000166668	4.55625e-05	2.25e-08	1.849e-07	3.249e-07	8.8209e-06	0.000108994
51.4	0.04139	0.05551	0.04905	0.03665	0.02133	0.03273	0.02803	0.00786		0.0377	0.0404	0.0415	0.0323	0.0253	0.031	0.0272	0.0176		0.00369	0.01511	0.00755	0.00435	-0.00397	0.00173	0.00083	-0.00974		1.36161e-05	0.000228312	5.70025e-05	1.89225e-05	1.57609e-05	2.9929e-06	6.889e-07	9.48676e-05
51.6	0.04179	0.05151	0.04905	0.03475	0.02613	0.03153	0.02648	0.00711		0.0375	0.0402	0.0414	0.0324	0.0253	0.0309	0.0271	0.0175		0.00429	0.01131	0.00765	0.00235	0.00083	0.00063	-0.00062	-0.01039		1.84041e-05	0.000127916	5.85225e-05	5.5225e-06	6.889e-07	3.969e-07	3.844e-07	0.000107952
51.8	0.04184	0.05046	0.04605	0.03135	0.02563	0.03168	0.02643	0.01131		0.0373	0.0399	0.0412	0.0324	0.0253	0.031	0.027	0.0175		0.00454	0.01056	0.00485	-0.00105	0.00033	0.00068	-0.00057	-0.00619		2.06116e-05	0.000111514	2.35225e-05	1.1025e-06	1.089e-07	4.624e-07	3.249e-07	3.83161e-05
52	0.04174	0.04981	0.0467	0.0337	0.02628	0.03248	0.02408	0.01006		0.0371	0.0401	0.0411	0.0325	0.0253	0.0312	0.0269	0.0175		0.00464	0.00971	0.0056	0.0012	0.00098	0.00128	-0.00282	-0.00744		2.15296e-05	9.42841e-05	3.136e-05	1.44e-06	9.604e-07	1.6384e-06	7.9524e-06	5.53536e-05
52.2	0.04159	0.05051	0.0458	0.03215	0.02628	0.03213	0.02638	0.00931		0.0367	0.0401	0.041	0.0326	0.0252	0.0313	0.0269	0.0175		0.00489	0.01041	0.0048	-0.00045	0.00108	0.00083	-0.00052	-0.00819		2.39121e-05	0.000108368	2.304e-05	2.025e-07	1.1664e-06	6.889e-07	2.704e-07	6.70761e-05
52.4	0.04234	0.04901	0.0442	0.03025	0.02803	0.03283	0.02643	0.00961		0.0366	0.0403	0.041	0.0325	0.0251	0.0314	0.027	0.0173		0.00574	0.00871	0.0032	-0.00225	0.00293	0.00143	-0.00057	-0.00769		3.29476e-05	7.58641e-05	1.024e-05	5.0625e-06	8.5849e-06	2.0449e-06	3.249e-07	5.91361e-05
52.6	0.04139	0.04846	0.0439	0.0321	0.02723	0.03203	0.02578	0.00716		0.0367	0.0403	0.041	0.0323	0.025	0.0313	0.0269	0.0172		0.00469	0.00816	0.0029	-0.0002	0.00223	0.00073	-0.00112	-0.01004		2.19961e-05	6.65856e-05	8.41e-06	4e-08	4.9729e-06	5.329e-07	1.2544e-06	0.000100802
52.8	0.04189	0.04981	0.0443	0.0347	0.02803	0.03218	0.02773	0.00786		0.0368	0.0406	0.0409	0.0322	0.0249	0.0311	0.0268	0.0173		0.00509	0.00921	0.0034	0.0025	0.00313	0.00108	0.00093	-0.00944		2.59081e-05	8.48241e-05	1.156e-05	6.25e-06	9.7969e-06	1.1664e-06	8.649e-07	8.91136e-05
53	0.04054	0.04801	0.04655	0.0356	0.02718	0.03193	0.02558	0.01456		0.0369	0.0405	0.0409	0.032	0.0248	0.0309	0.0267	0.0175		0.00364	0.00751	0.00565	0.0036	0.00238	0.00103	-0.00112	-0.00294		1.32496e-05	5.64001e-05	3.19225e-05	1.296e-05	5.6644e-06	1.0609e-06	1.2544e-06	8.6436e-06
53.2	0.04124	0.04881	0.04805	0.0364	0.02553	0.03183	0.02553	0.01186		0.0372	0.0406	0.0409	0.032	0.0248	0.0307	0.0265	0.0175		0.00404	0.00821	0.00715	0.0044	0.00073	0.00113	-0.00097	-0.00564		1.63216e-05	6.74041e-05	5.11225e-05	1.936e-05	5.329e-07	1.2769e-06	9.409e-07	3.18096e-05
53.4	0.04109	0.05056	0.046	0.0338	0.02408	0.03078	0.02488	0.01056		0.0374	0.0402	0.041	0.0319	0.0249	0.0305	0.0264	0.0175		0.00369	0.01036	0.005	0.0019	-0.00082	0.00028	-0.00152	-0.00694		1.36161e-05	0.00010733	2.5e-05	3.61e-06	6.724e-07	7.84e-08	2.3104e-06	4.81636e-05
53.6	0.03969	0.04791	0.0456	0.0334	0.02448	0.02938	0.02538	0.00836		0.0373	0.0403	0.0409	0.0321	0.0249	0.0304	0.0264	0.0173		0.00239	0.00761	0.0047	0.0013	-0.00042	-0.00102	-0.00102	-0.00894		5.7121e-06	5.79121e-05	2.209e-05	1.69e-06	1.764e-07	1.0404e-06	1.0404e-06	7.99236e-05
53.8	0.04064	0.04806	0.0439	0.0344	0.02483	0.02958	0.02413	0.00651		0.037	0.0399	0.041	0.0322	0.0249	0.0304	0.0263	0.0172		0.00364	0.00816	0.0029	0.0022	-7e-05	-0.00082	-0.00217	-0.01069		1.32496e-05	6.65856e-05	8.41e-06	4.84e-06	4.9e-09	6.724e-07	4.7089e-06	0.000114276
54	0.04084	0.04751	0.04185	0.03395	0.02583	0.02893	0.02758	0.00726		0.0371	0.0401	0.0409	0.0322	0.0248	0.0305	0.0264	0.0171		0.00374	0.00741	0.00095	0.00175	0.00103	-0.00157	0.00118	-0.00984		1.39876e-05	5.49081e-05	9.025e-07	3.0625e-06	1.0609e-06	2.4649e-06	1.3924e-06	9.68256e-05
54.2	0.04159	0.04726	0.0421	0.034	0.02768	0.03103	0.02573	0.00611		0.0367	0.0401	0.0408	0.0321	0.0247	0.0306	0.0264	0.0171		0.00489	0.00716	0.0013	0.0019	0.00298	0.00043	-0.00067	-0.01099		2.39121e-05	5.12656e-05	1.69e-06	3.61e-06	8.8804e-06	1.849e-07	4.489e-07	0.00012078
54.4	0.04069	0.04511	0.04545	0.03155	0.02603	0.03038	0.02628	0.01371		0.0367	0.0404	0.0408	0.0321	0.0245	0.0307	0.0264	0.017		0.00399	0.00471	0.00465	-0.00055	0.00153	-0.00032	-0.00012	-0.00329		1.59201e-05	2.21841e-05	2.16225e-05	3.025e-07	2.3409e-06	1.024e-07	1.44e-08	1.08241e-05
54.6	0.04009	0.04501	0.045	0.0318	0.02658	0.02943	0.02558	0.01146		0.0366	0.0405	0.0408	0.0319	0.0243	0.0307	0.0263	0.0171		0.00349	0.00451	0.0042	-0.0001	0.00228	-0.00127	-0.00072	-0.00564		1.21801e-05	2.03401e-05	1.764e-05	1e-08	5.1984e-06	1.6129e-06	5.184e-07	3.18096e-05
54.8	0.04179	0.04626	0.0444	0.0348	0.02683	0.03263	0.02483	0.01091		0.0367	0.0404	0.0408	0.0318	0.0243	0.0306	0.0262	0.0171		0.00509	0.00586	0.0036	0.003	0.00253	0.00203	-0.00137	-0.00619		2.59081e-05	3.43396e-05	1.296e-05	9e-06	6.4009e-06	4.1209e-06	1.8769e-06	3.83161e-05
55	0.04049	0.04616	0.0447	0.03425	0.02593	0.03088	0.02518	0.00861		0.0367	0.0405	0.0408	0.0317	0.0242	0.0304	0.026	0.0172		0.00379	0.00566	0.0039	0.00255	0.00173	0.00048	-0.00082	-0.00859		1.43641e-05	3.20356e-05	1.521e-05	6.5025e-06	2.9929e-06	2.304e-07	6.724e-07	7.37881e-05
55.2	0.04019	0.04836	0.0437	0.0363	0.02438	0.03133	0.02708	0.00791		0.0367	0.0402	0.0407	0.0317	0.0243	0.0303	0.0259	0.0173		0.00349	0.00816	0.003	0.0046	8e-05	0.00103	0.00118	-0.00939		1.21801e-05	6.65856e-05	9e-06	2.116e-05	6.4e-09	1.0609e-06	1.3924e-06	8.81721e-05
55.4	0.03954	0.04836	0.04	0.03365	0.02603	0.03108	0.02533	0.00911		0.037	0.04	0.0406	0.0317	0.0244	0.0302	0.0258	0.0173		0.00254	0.00836	-0.0006	0.00195	0.00163	0.00088	-0.00047	-0.00819		6.4516e-06	6.98896e-05	3.6e-07	3.8025e-06	2.6569e-06	7.744e-07	2.209e-07	6.70761e-05
55.6	0.04109	0.04606	0.0408	0.03345	0.02588	0.03258	0.02628	0.00806		0.0371	0.04	0.0405	0.0318	0.0245	0.0301	0.0258	0.0172		0.00399	0.00606	0.0003	0.00165	0.00138	0.00248	0.00048	-0.00914		1.59201e-05	3.67236e-05	9e-08	2.7225e-06	1.9044e-06	6.1504e-06	2.304e-07	8.35396e-05
55.8	0.03924	0.04586	0.0403	0.028	0.02653	0.03048	0.02703	0.01056		0.0368	0.0399	0.0405	0.0319	0.0246	0.03	0.0259	0.0171		0.00244	0.00596	-0.0002	-0.0039	0.00193	0.00048	0.00113	-0.00654		5.9536e-06	3.55216e-05	4e-08	1.521e-05	3.7249e-06	2.304e-07	1.2769e-06	4.27716e-05
56	0.04089	0.04686	0.04255	0.03015	0.02328	0.03063	0.02338	0.01326		0.0368	0.0402	0.0406	0.0318	0.0246	0.03	0.0259	0.0169		0.00409	0.00666	0.00195	-0.00165	-0.00132	0.00063	-0.00252	-0.00364		1.67281e-05	4.43556e-05	3.8025e-06	2.7225e-06	1.7424e-06	3.969e-07	6.3504e-06	1.32496e-05
56.2	0.03964	0.04566	0.0474	0.0316	0.02688	0.03163	0.02453	0.01221		0.0367	0.0401	0.0406	0.0318	0.0245	0.03	0.026	0.0168		0.00294	0.00556	0.0068	-0.0002	0.00238	0.00163	-0.00147	-0.00459		8.6436e-06	3.09136e-05	4.624e-05	4e-08	5.6644e-06	2.6569e-06	2.1609e-06	2.10681e-05
56.4	0.04044	0.04701	0.04665	0.03495	0.02383	0.03103	0.02658	0.00876		0.0365	0.0404	0.0408	0.0318	0.0244	0.03	0.026	0.0168		0.00394	0.00661	0.00585	0.00315	-0.00057	0.00103	0.00058	-0.00804		1.55236e-05	4.36921e-05	3.42225e-05	9.9225e-06	3.249e-07	1.0609e-06	3.364e-07	6.46416e-05
56.6	0.03984	0.04766	0.0441	0.0367	0.02303	0.02678	0.02953	0.00726		0.0364	0.0404	0.0408	0.0316	0.0243	0.0301	0.026	0.017		0.00344	0.00726	0.0033	0.0051	-0.00127	-0.00332	0.00353	-0.00974		1.18336e-05	5.27076e-05	1.089e-05	2.601e-05	1.6129e-06	1.10224e-05	1.24609e-05	9.48676e-05
56.8	0.03959	0.04881	0.04155	0.03715	0.02368	0.03143	0.02478	0.00686		0.0365	0.0403	0.0407	0.0316	0.0241	0.0302	0.0259	0.0169		0.00309	0.00851	0.00085	0.00555	-0.00042	0.00123	-0.00112	-0.01004		9.5481e-06	7.24201e-05	7.225e-07	3.08025e-05	1.764e-07	1.5129e-06	1.2544e-06	0.000100802
57	0.03969	0.04786	0.04115	0.035	0.02653	0.03098	0.02458	0.00656		0.0365	0.0403	0.0407	0.0316	0.024	0.0302	0.0257	0.017		0.00319	0.00756	0.00045	0.0034	0.00253	0.00078	-0.00112	-0.01044		1.01761e-05	5.71536e-05	2.025e-07	1.156e-05	6.4009e-06	6.084e-07	1.2544e-06	0.000108994
57.2	0.04039	0.04791	0.0403	0.03245	0.02473	0.03228	0.02583	0.01061		0.0363	0.0402	0.0405	0.0316	0.024	0.0301	0.0256	0.0169		0.00409	0.00771	-0.0002	0.00085	0.00073	0.00218	0.00023	-0.00629		1.67281e-05	5.94441e-05	4e-08	7.225e-07	5.329e-07	4.7524e-06	5.29e-08	3.95641e-05
57.4	0.04034	0.04641	0.044	0.0335	0.02658	0.03008	0.02678	0.00926		0.0364	0.0399	0.0405	0.0316	0.024	0.0301	0.0255	0.0169		0.00394	0.00651	0.0035	0.0019	0.00258	-2e-05	0.00128	-0.00764		1.55236e-05	4.23801e-05	1.225e-05	3.61e-06	6.6564e-06	4e-10	1.6384e-06	5.83696e-05
57.6	0.03999	0.04511	0.0445	0.0347	0.02628	0.03228	0.02723	0.00916		0.0365	0.04	0.0404	0.0316	0.0241	0.0299	0.0255	0.0169		0.00349	0.00511	0.0041	0.0031	0.00218	0.00238	0.00173	-0.00774		1.21801e-05	2.61121e-05	1.681e-05	9.61e-06	4.7524e-06	5.6644e-06	2.9929e-06	5.99076e-05
57.8	0.04029	0.04691	0.04435	0.03565	0.02483	0.03128	0.02218	0.00806		0.0364	0.0399	0.0403	0.0315	0.0241	0.0298	0.0255	0.0169		0.00389	0.00701	0.00405	0.00415	0.00073	0.00148	-0.00332	-0.00884		1.51321e-05	4.91401e-05	1.64025e-05	1.72225e-05	5.329e-07	2.1904e-06	1.10224e-05	7.81456e-05
58	0.03929	0.04796	0.0429	0.03775	0.02178	0.03178	0.02563	0.00641		0.0364	0.0401	0.0404	0.0315	0.0242	0.0297	0.0255	0.0168		0.00289	0.00786	0.0025	0.00625	-0.00242	0.00208	0.00013	-0.01039		8.3521e-06	6.17796e-05	6.25e-06	3.90625e-05	5.8564e-06	4.3264e-06	1.69e-08	0.000107952
58.2	0.03889	0.04771	0.04365	0.03545	0.02333	0.03128	0.02398	0.00636		0.0364	0.0399	0.0403	0.0314	0.0242	0.0296	0.0256	0.0167		0.00249	0.00781	0.00335	0.00405	-0.00087	0.00168	-0.00162	-0.01034		6.2001e-06	6.09961e-05	1.12225e-05	1.64025e-05	7.569e-07	2.8224e-06	2.6244e-06	0.000106916
58.4	0.03924	0.04696	0.0409	0.03015	0.02478	0.03193	0.02653	0.00866		0.0364	0.0399	0.0404	0.0314	0.0241	0.0296	0.0256	0.0167		0.00284	0.00706	0.0005	-0.00125	0.00068	0.00233	0.00093	-0.00804		8.0656e-06	4.98436e-05	2.5e-07	1.5625e-06	4.624e-07	5.4289e-06	8.649e-07	6.46416e-05
58.6	0.04034	0.04641	0.0404	0.03315	0.02518	0.03053	0.02438	0.01056		0.0363	0.04	0.0404	0.0313	0.0241	0.0296	0.0256	0.0167		0.00404	0.00641	0	0.00185	0.00108	0.00093	-0.00122	-0.00614		1.63216e-05	4.10881e-05	0	3.4225e-06	1.1664e-06	8.649e-07	1.4884e-06	3.76996e-05
58.8	0.03974	0.04586	0.04215	0.03125	0.02648	0.03018	0.02423	0.00891		0.0361	0.0399	0.0403	0.0312	0.024	0.0296	0.0255	0.0167		0.00364	0.00596	0.00185	5e-05	0.00248	0.00058	-0.00127	-0.00779		1.32496e-05	3.55216e-05	3.4225e-06	2.5e-09	6.1504e-06	3.364e-07	1.6129e-06	6.06841e-05
59
59.2
59.4
59.6
59.8

## Sheet: RMSE_BR_10
t	S3	S4	S5	S6	S7	S8	S9	S10		HEC_M10_P3	HEC_M10_P4	HEC_M10_P5	HEC_M10_P6	HEC_M10_P7	HEC_M10_P8	HEC_M10_P9	HEC_M10_P10		Error_3	Error_4	Error_5	Error_6	Error_7	Error_8	Error_9	Error_10		Error^2_3	Error^2_4	Error^2_5	Error^2_6	Error^2_7	Error^2_8	Error^2_9	Error^2_10		RMSE_3	RMSE_4	RMSE_5	RMSE_6	RMSE_7	RMSE_8	RMSE_9	RMSE_10
0	-1e-05	-4e-05	0	-0.00015	-2e-05	-7e-05	3e-05	1e-05		0	0	0	0	0	0	0	0		-1e-05	-4e-05	0	-0.00015	-2e-05	-7e-05	3e-05	1e-05		1e-10	1.6e-09	0	2.25e-08	4e-10	4.9e-09	9e-10	1e-10		0.622812	0.9141	0.483498	0.947184	0.383474	0.395485	0.248152	0.665857
0.2	-6e-05	1e-05	-5e-05	0.00015	8e-05	0.00013	-0.00017	1e-05		0	0	0	0	0	0	0	0		-6e-05	1e-05	-5e-05	0.00015	8e-05	0.00013	-0.00017	1e-05		3.6e-09	1e-10	2.5e-09	2.25e-08	6.4e-09	1.69e-08	2.89e-08	1e-10
0.4	0.00014	0.00011	5e-05	5e-05	3e-05	3e-05	-2e-05	1e-05		0	0	0	0	0	0	0	0		0.00014	0.00011	5e-05	5e-05	3e-05	3e-05	-2e-05	1e-05		1.96e-08	1.21e-08	2.5e-09	2.5e-09	9e-10	9e-10	4e-10	1e-10
0.6	-1e-05	-9e-05	-0.0001	-5e-05	-7e-05	8e-05	-2e-05	-4e-05		0	0	0	0	0	0	0	0		-1e-05	-9e-05	-0.0001	-5e-05	-7e-05	8e-05	-2e-05	-4e-05		1e-10	8.1e-09	1e-08	2.5e-09	4.9e-09	6.4e-09	4e-10	1.6e-09
0.8	-0.00016	-4e-05	5e-05	-5e-05	-0.00012	8e-05	-2e-05	6e-05		0	0	0	0	0	0	0	0		-0.00016	-4e-05	5e-05	-5e-05	-0.00012	8e-05	-2e-05	6e-05		2.56e-08	1.6e-09	2.5e-09	2.5e-09	1.44e-08	6.4e-09	4e-10	3.6e-09
1	4e-05	1e-05	0.00015	-0.00015	-0.00017	0.00018	-7e-05	1e-05		0	0	0	0	0	0	0	0		4e-05	1e-05	0.00015	-0.00015	-0.00017	0.00018	-7e-05	1e-05		1.6e-09	1e-10	2.25e-08	2.25e-08	2.89e-08	3.24e-08	4.9e-09	1e-10
1.2	-6e-05	0.00011	-0.0001	0.0002	0.00013	8e-05	-2e-05	-4e-05		0	0	0	0	0	0	0	0		-6e-05	0.00011	-0.0001	0.0002	0.00013	8e-05	-2e-05	-4e-05		3.6e-09	1.21e-08	1e-08	4e-08	1.69e-08	6.4e-09	4e-10	1.6e-09
1.4	0.00039	-9e-05	0.00015	0	0.00013	0.00033	-7e-05	-4e-05		0	0	0	0	0	0	0	0		0.00039	-9e-05	0.00015	0	0.00013	0.00033	-7e-05	-4e-05		1.521e-07	8.1e-09	2.25e-08	0	1.69e-08	1.089e-07	4.9e-09	1.6e-09
1.6	-6e-05	1e-05	5e-05	-5e-05	8e-05	3e-05	-2e-05	-4e-05		0	0	0	0	0	0	0	0		-6e-05	1e-05	5e-05	-5e-05	8e-05	3e-05	-2e-05	-4e-05		3.6e-09	1e-10	2.5e-09	2.5e-09	6.4e-09	9e-10	4e-10	1.6e-09
1.8	-0.00016	1e-05	0.0001	-5e-05	-2e-05	-2e-05	3e-05	-4e-05		0	0	0	0	0	0	0	0		-0.00016	1e-05	0.0001	-5e-05	-2e-05	-2e-05	3e-05	-4e-05		2.56e-08	1e-10	1e-08	2.5e-09	4e-10	4e-10	9e-10	1.6e-09
2	9e-05	0.00011	0	-0.00015	-2e-05	-7e-05	3e-05	1e-05		0	0	0	0	0	0	0	0		9e-05	0.00011	0	-0.00015	-2e-05	-7e-05	3e-05	1e-05		8.1e-09	1.21e-08	0	2.25e-08	4e-10	4.9e-09	9e-10	1e-10
2.2	-1e-05	-0.00014	0	0.00015	8e-05	-0.00017	3e-05	6e-05		0	0	0	0	0	0	0	0		-1e-05	-0.00014	0	0.00015	8e-05	-0.00017	3e-05	6e-05		1e-10	1.96e-08	0	2.25e-08	6.4e-09	2.89e-08	9e-10	3.6e-09
2.4	9e-05	1e-05	-0.00015	0	-2e-05	-7e-05	8e-05	6e-05		0	0	0	0	0	0	0	0		9e-05	1e-05	-0.00015	0	-2e-05	-7e-05	8e-05	6e-05		8.1e-09	1e-10	2.25e-08	0	4e-10	4.9e-09	6.4e-09	3.6e-09
2.6	-6e-05	1e-05	5e-05	0	-7e-05	-0.00022	8e-05	0.00011		0	0	0	0	0	0	0	0		-6e-05	1e-05	5e-05	0	-7e-05	-0.00022	8e-05	0.00011		3.6e-09	1e-10	2.5e-09	0	4.9e-09	4.84e-08	6.4e-09	1.21e-08
2.8	-0.00016	0.00011	-0.0001	-5e-05	-0.00012	-0.00012	0.00013	0.00011		0	0	0	0	0	0	0	0		-0.00016	0.00011	-0.0001	-5e-05	-0.00012	-0.00012	0.00013	0.00011		2.56e-08	1.21e-08	1e-08	2.5e-09	1.44e-08	1.44e-08	1.69e-08	1.21e-08
3	4e-05	-9e-05	0	-0.00015	-0.00012	-0.00017	0.00013	0.00011		0	0	0	0	0	0	0	0		4e-05	-9e-05	0	-0.00015	-0.00012	-0.00017	0.00013	0.00011		1.6e-09	8.1e-09	0	2.25e-08	1.44e-08	2.89e-08	1.69e-08	1.21e-08
3.2	-1e-05	-4e-05	-0.0001	0.00015	0.00023	-7e-05	0.00028	0.00011		0	0	0	0	0	0	0	0		-1e-05	-4e-05	-0.0001	0.00015	0.00023	-7e-05	0.00028	0.00011		1e-10	1.6e-09	1e-08	2.25e-08	5.29e-08	4.9e-09	7.84e-08	1.21e-08
3.4	-0.00011	-4e-05	0.0001	0	0.00013	-0.00017	3e-05	0.00036		0	0	0	0	0	0	0	0		-0.00011	-4e-05	0.0001	0	0.00013	-0.00017	3e-05	0.00036		1.21e-08	1.6e-09	1e-08	0	1.69e-08	2.89e-08	9e-10	1.296e-07
3.6	-6e-05	0.00011	0.0001	0	-2e-05	-7e-05	-0.00012	0.00011		0	0	0	0	0	0	0	0		-6e-05	0.00011	0.0001	0	-2e-05	-7e-05	-0.00012	0.00011		3.6e-09	1.21e-08	1e-08	0	4e-10	4.9e-09	1.44e-08	1.21e-08
3.8	-0.00011	-9e-05	0	-0.0001	-2e-05	-0.00017	-0.00012	1e-05		0	0	0	0	0	0	0	0		-0.00011	-9e-05	0	-0.0001	-2e-05	-0.00017	-0.00012	1e-05		1.21e-08	8.1e-09	0	1e-08	4e-10	2.89e-08	1.44e-08	1e-10
4	9e-05	6e-05	0.0003	-0.0002	-2e-05	-7e-05	-0.00022	-9e-05		0	0	0	0	0	0	0	0		9e-05	6e-05	0.0003	-0.0002	-2e-05	-7e-05	-0.00022	-9e-05		8.1e-09	3.6e-09	9e-08	4e-08	4e-10	4.9e-09	4.84e-08	8.1e-09
4.2	-6e-05	1e-05	-5e-05	0.0001	3e-05	-0.00017	-0.00012	-0.00014		0	0	0	0	0	0	0	0		-6e-05	1e-05	-5e-05	0.0001	3e-05	-0.00017	-0.00012	-0.00014		3.6e-09	1e-10	2.5e-09	1e-08	9e-10	2.89e-08	1.44e-08	1.96e-08
4.4	-0.00016	0.00011	0.00015	0	-2e-05	3e-05	-0.00012	-0.00014		0	0	0	0	0	0	0	0		-0.00016	0.00011	0.00015	0	-2e-05	3e-05	-0.00012	-0.00014		2.56e-08	1.21e-08	2.25e-08	0	4e-10	9e-10	1.44e-08	1.96e-08
4.6	-6e-05	-0.00014	-5e-05	-0.0001	-7e-05	-0.00012	-7e-05	-0.00014		0	0	0	0	0	0	0	0		-6e-05	-0.00014	-5e-05	-0.0001	-7e-05	-0.00012	-7e-05	-0.00014		3.6e-09	1.96e-08	2.5e-09	1e-08	4.9e-09	1.44e-08	4.9e-09	1.96e-08
4.8	-0.00011	1e-05	0.0001	-0.0001	-0.00017	3e-05	-0.00012	-0.00014		0	0	0	0	0	0	0	0		-0.00011	1e-05	0.0001	-0.0001	-0.00017	3e-05	-0.00012	-0.00014		1.21e-08	1e-10	1e-08	1e-08	2.89e-08	9e-10	1.44e-08	1.96e-08
5	9e-05	1e-05	-0.0001	-0.0002	-7e-05	-7e-05	-0.00012	-0.00014		0	0	0	0	0	0	0	0		9e-05	1e-05	-0.0001	-0.0002	-7e-05	-7e-05	-0.00012	-0.00014		8.1e-09	1e-10	1e-08	4e-08	4.9e-09	4.9e-09	1.44e-08	1.96e-08
5.2	-1e-05	0.00016	5e-05	0.0001	0.00013	3e-05	-7e-05	-9e-05		0	0	0	0	0	0	0	0		-1e-05	0.00016	5e-05	0.0001	0.00013	3e-05	-7e-05	-9e-05		1e-10	2.56e-08	2.5e-09	1e-08	1.69e-08	9e-10	4.9e-09	8.1e-09
5.4	-0.00021	-0.00014	-0.0001	-5e-05	0.00013	-7e-05	-2e-05	-9e-05		0	0	0	0	0	0	0	0		-0.00021	-0.00014	-0.0001	-5e-05	0.00013	-7e-05	-2e-05	-9e-05		4.41e-08	1.96e-08	1e-08	2.5e-09	1.69e-08	4.9e-09	4e-10	8.1e-09
5.6	-1e-05	1e-05	0	0	3e-05	8e-05	-2e-05	-4e-05		0	0	0	0	0	0	0	0		-1e-05	1e-05	0	0	3e-05	8e-05	-2e-05	-4e-05		1e-10	1e-10	0	0	9e-10	6.4e-09	4e-10	1.6e-09
5.8	-6e-05	1e-05	-0.00015	-0.0001	-2e-05	-2e-05	3e-05	-4e-05		0	0	0	0	0	0	0	0		-6e-05	1e-05	-0.00015	-0.0001	-2e-05	-2e-05	3e-05	-4e-05		3.6e-09	1e-10	2.25e-08	1e-08	4e-10	4e-10	9e-10	1.6e-09
6	9e-05	0.00011	5e-05	-0.00015	-2e-05	0.00028	-2e-05	1e-05		0	0	0	0	0	0	0	0		9e-05	0.00011	5e-05	-0.00015	-2e-05	0.00028	-2e-05	1e-05		8.1e-09	1.21e-08	2.5e-09	2.25e-08	4e-10	7.84e-08	4e-10	1e-10
6.2	4e-05	-9e-05	5e-05	5e-05	3e-05	-7e-05	-7e-05	-4e-05		0	0	0	0	0	0	0	0		4e-05	-9e-05	5e-05	5e-05	3e-05	-7e-05	-7e-05	-4e-05		1.6e-09	8.1e-09	2.5e-09	2.5e-09	9e-10	4.9e-09	4.9e-09	1.6e-09
6.4	-0.00016	1e-05	0.0001	-5e-05	-7e-05	-2e-05	3e-05	-9e-05		0	0	0	0	0	0	0	0		-0.00016	1e-05	0.0001	-5e-05	-7e-05	-2e-05	3e-05	-9e-05		2.56e-08	1e-10	1e-08	2.5e-09	4.9e-09	4e-10	9e-10	8.1e-09
6.6	4e-05	1e-05	0.00035	0	-7e-05	-7e-05	-7e-05	6e-05		0	0	0	0	0	0	0	0		4e-05	1e-05	0.00035	0	-7e-05	-7e-05	-7e-05	6e-05		1.6e-09	1e-10	1.225e-07	0	4.9e-09	4.9e-09	4.9e-09	3.6e-09
6.8	-0.00011	0.00011	0	-0.0001	-0.00012	-0.00022	-7e-05	-4e-05		0	0	0	0	0	0	0	0		-0.00011	0.00011	0	-0.0001	-0.00012	-0.00022	-7e-05	-4e-05		1.21e-08	1.21e-08	0	1e-08	1.44e-08	4.84e-08	4.9e-09	1.6e-09
7	9e-05	-9e-05	0.00015	-5e-05	-2e-05	-0.00017	-7e-05	-4e-05		0	0	0	0	0	0	0	0		9e-05	-9e-05	0.00015	-5e-05	-2e-05	-0.00017	-7e-05	-4e-05		8.1e-09	8.1e-09	2.25e-08	2.5e-09	4e-10	2.89e-08	4.9e-09	1.6e-09
7.2	-6e-05	1e-05	0	5e-05	0.00013	-0.00022	-7e-05	1e-05		0	0	0	0	0	0	0	0		-6e-05	1e-05	0	5e-05	0.00013	-0.00022	-7e-05	1e-05		3.6e-09	1e-10	0	2.5e-09	1.69e-08	4.84e-08	4.9e-09	1e-10
7.4	-0.00016	1e-05	5e-05	-5e-05	8e-05	-0.00012	-2e-05	-4e-05		0	0	0	0	0	0	0	0		-0.00016	1e-05	5e-05	-5e-05	8e-05	-0.00012	-2e-05	-4e-05		2.56e-08	1e-10	2.5e-09	2.5e-09	6.4e-09	1.44e-08	4e-10	1.6e-09
7.6	-1e-05	0.00016	-0.0001	0	3e-05	-0.00022	-2e-05	1e-05		0	0	0	0	0	0	0	0		-1e-05	0.00016	-0.0001	0	3e-05	-0.00022	-2e-05	1e-05		1e-10	2.56e-08	1e-08	0	9e-10	4.84e-08	4e-10	1e-10
7.8	-0.00011	-9e-05	5e-05	-0.00015	-2e-05	-7e-05	-2e-05	1e-05		0	0	0	0	0	0	0	0		-0.00011	-9e-05	5e-05	-0.00015	-2e-05	-7e-05	-2e-05	1e-05		1.21e-08	8.1e-09	2.5e-09	2.25e-08	4e-10	4.9e-09	4e-10	1e-10
8	0.00029	1e-05	-0.00015	0.00015	3e-05	-0.00022	-2e-05	1e-05		0	0	0	0	0	0	0	0		0.00029	1e-05	-0.00015	0.00015	3e-05	-0.00022	-2e-05	1e-05		8.41e-08	1e-10	2.25e-08	2.25e-08	9e-10	4.84e-08	4e-10	1e-10
8.2	-0.00011	1e-05	0	0.0001	-2e-05	-7e-05	3e-05	1e-05		0	0	0	0	0	0	0	0		-0.00011	1e-05	0	0.0001	-2e-05	-7e-05	3e-05	1e-05		1.21e-08	1e-10	0	1e-08	4e-10	4.9e-09	9e-10	1e-10
8.4	-0.00016	0.00021	-0.0002	-5e-05	-2e-05	-0.00022	3e-05	6e-05		0	0	0	0	0	0	0	0		-0.00016	0.00021	-0.0002	-5e-05	-2e-05	-0.00022	3e-05	6e-05		2.56e-08	4.41e-08	4e-08	2.5e-09	4e-10	4.84e-08	9e-10	3.6e-09
8.6	-1e-05	-0.00014	5e-05	-5e-05	-0.00012	3e-05	8e-05	0.00011		0	0	0	0	0	0	0	0		-1e-05	-0.00014	5e-05	-5e-05	-0.00012	3e-05	8e-05	0.00011		1e-10	1.96e-08	2.5e-09	2.5e-09	1.44e-08	9e-10	6.4e-09	1.21e-08
8.8	-6e-05	-4e-05	-5e-05	-0.00015	-0.00017	-0.00017	8e-05	6e-05		0	0	0	0	0	0	0	0		-6e-05	-4e-05	-5e-05	-0.00015	-0.00017	-0.00017	8e-05	6e-05		3.6e-09	1.6e-09	2.5e-09	2.25e-08	2.89e-08	2.89e-08	6.4e-09	3.6e-09
9	4e-05	1e-05	5e-05	0.00025	3e-05	-2e-05	0.00028	0.00011		0	0	0	0	0	0	0	0		4e-05	1e-05	5e-05	0.00025	3e-05	-2e-05	0.00028	0.00011		1.6e-09	1e-10	2.5e-09	6.25e-08	9e-10	4e-10	7.84e-08	1.21e-08
9.2	-0.00011	0.00031	0.00035	5e-05	8e-05	-0.00012	3e-05	0.00016		0	0	0	0	0	0	0	0		-0.00011	0.00031	0.00035	5e-05	8e-05	-0.00012	3e-05	0.00016		1.21e-08	9.61e-08	1.225e-07	2.5e-09	6.4e-09	1.44e-08	9e-10	2.56e-08
9.4	-0.00016	-0.00014	-5e-05	-5e-05	3e-05	-2e-05	-7e-05	0.00016		0	0	0	0	0	0	0	0		-0.00016	-0.00014	-5e-05	-5e-05	3e-05	-2e-05	-7e-05	0.00016		2.56e-08	1.96e-08	2.5e-09	2.5e-09	9e-10	4e-10	4.9e-09	2.56e-08
9.6	4e-05	-0.00024	0.0001	-5e-05	-2e-05	-0.00012	-0.00017	6e-05		0	0	0	0	0	0	0	0		4e-05	-0.00024	0.0001	-5e-05	-2e-05	-0.00012	-0.00017	6e-05		1.6e-09	5.76e-08	1e-08	2.5e-09	4e-10	1.44e-08	2.89e-08	3.6e-09
9.8	-1e-05	1e-05	-5e-05	-0.00015	-7e-05	8e-05	-0.00012	-0.00014		0	0	0	0	0	0	0	0		-1e-05	1e-05	-5e-05	-0.00015	-7e-05	8e-05	-0.00012	-0.00014		1e-10	1e-10	2.5e-09	2.25e-08	4.9e-09	6.4e-09	1.44e-08	1.96e-08
10	-0.00011	0.00041	0	0.0001	3e-05	-7e-05	-0.00017	-0.00019		0	0	0	0	0	0	0	0		-0.00011	0.00041	0	0.0001	3e-05	-7e-05	-0.00017	-0.00019		1.21e-08	1.681e-07	0	1e-08	9e-10	4.9e-09	2.89e-08	3.61e-08
10.2	-0.00011	-4e-05	-0.0001	-5e-05	-2e-05	0.00023	-0.00017	-0.00019		0	0	0	0	0	0	0	0		-0.00011	-4e-05	-0.0001	-5e-05	-2e-05	0.00023	-0.00017	-0.00019		1.21e-08	1.6e-09	1e-08	2.5e-09	4e-10	5.29e-08	2.89e-08	3.61e-08
10.4	-0.00016	-0.00024	5e-05	-5e-05	-2e-05	-0.00012	-0.00017	-0.00014		0	0	0	0	0	0	0	0		-0.00016	-0.00024	5e-05	-5e-05	-2e-05	-0.00012	-0.00017	-0.00014		2.56e-08	5.76e-08	2.5e-09	2.5e-09	4e-10	1.44e-08	2.89e-08	1.96e-08
10.6	4e-05	1e-05	-0.00015	-5e-05	-0.00012	-0.00012	-0.00012	-0.00019		0	0	0	0	0	0	0	0		4e-05	1e-05	-0.00015	-5e-05	-0.00012	-0.00012	-0.00012	-0.00019		1.6e-09	1e-10	2.25e-08	2.5e-09	1.44e-08	1.44e-08	1.44e-08	3.61e-08
10.8	-6e-05	0.00066	-5e-05	-0.0002	-0.00017	-0.00017	-0.00012	-0.00014		0	0	0	0	0	0	0	0		-6e-05	0.00066	-5e-05	-0.0002	-0.00017	-0.00017	-0.00012	-0.00014		3.6e-09	4.356e-07	2.5e-09	4e-08	2.89e-08	2.89e-08	1.44e-08	1.96e-08
11	-0.00016	0.01081	-0.00015	0.0001	0.00013	-0.00027	-7e-05	-0.00014		0	0	0	0	0	0	0	0		-0.00016	0.01081	-0.00015	0.0001	0.00013	-0.00027	-7e-05	-0.00014		2.56e-08	0.000116856	2.25e-08	1e-08	1.69e-08	7.29e-08	4.9e-09	1.96e-08
11.2	0.00204	0.01051	5e-05	0	8e-05	-0.00012	-7e-05	-9e-05		0	0	0	0	0	0	0	0		0.00204	0.01051	5e-05	0	8e-05	-0.00012	-7e-05	-9e-05		4.1616e-06	0.00011046	2.5e-09	0	6.4e-09	1.44e-08	4.9e-09	8.1e-09
11.4	0.00929	0.01211	0.00365	0	3e-05	-0.00032	-7e-05	-9e-05		0	0	0	0	0	0	0	0		0.00929	0.01211	0.00365	0	3e-05	-0.00032	-7e-05	-9e-05		8.63041e-05	0.000146652	1.33225e-05	0	9e-10	1.024e-07	4.9e-09	8.1e-09
11.6	0.01154	0.01786	0.01275	-0.0001	3e-05	-0.00017	-2e-05	-4e-05		0	0.0338	0	0	0	0	0	0		0.01154	-0.01594	0.01275	-0.0001	3e-05	-0.00017	-2e-05	-4e-05		0.000133172	0.000254084	0.000162562	1e-08	9e-10	2.89e-08	4e-10	1.6e-09
11.8	0.01224	0.02656	0.01795	-0.0002	-0.00012	-0.00027	-2e-05	-4e-05		0.0366	0.0664	0	0	0	0	0	0		-0.02436	-0.03984	0.01795	-0.0002	-0.00012	-0.00027	-2e-05	-4e-05		0.00059341	0.00158723	0.000322203	4e-08	1.44e-08	7.29e-08	4e-10	1.6e-09
12	0.01389	0.03236	0.0167	0.0028	-0.00012	-0.00017	-0.00017	-4e-05		0.0372	0.0732	0.0378	0.039	0	0	0	0		-0.02331	-0.04084	-0.0211	-0.0362	-0.00012	-0.00017	-0.00017	-4e-05		0.000543356	0.00166791	0.00044521	0.00131044	1.44e-08	2.89e-08	2.89e-08	1.6e-09
12.2	0.01684	0.03216	0.01835	0.00595	-7e-05	-0.00022	-2e-05	-0.00019		0.0516	0.0702	0.0278	0.0385	0	0	0	0		-0.03476	-0.03804	-0.00945	-0.03255	-7e-05	-0.00022	-2e-05	-0.00019		0.00120826	0.00144704	8.93025e-05	0.0010595	4.9e-09	4.84e-08	4e-10	3.61e-08
12.4	0.01794	0.03646	0.0221	0.00635	0.00508	0.00563	-7e-05	1e-05		0.0508	0.0706	0.0515	0.041	0	0	0	0		-0.03286	-0.03414	-0.0294	-0.03465	0.00508	0.00563	-7e-05	1e-05		0.00107978	0.00116554	0.00086436	0.00120062	2.58064e-05	3.16969e-05	4.9e-09	1e-10
12.6	0.01994	0.03596	0.0244	0.0134	0.00718	0.01163	-7e-05	1e-05		0.0527	0.0713	0.0452	0.0416	0	0	0	0		-0.03276	-0.03534	-0.0208	-0.0282	0.00718	0.01163	-7e-05	1e-05		0.00107322	0.00124892	0.00043264	0.00079524	5.15524e-05	0.000135257	4.9e-09	1e-10
12.8	0.02579	0.04336	0.0287	0.01565	0.00888	0.01123	-7e-05	-4e-05		0.0619	0.0748	0.0374	0.0426	0	0.0146	0	0		-0.03611	-0.03144	-0.0087	-0.02695	0.00888	-0.00337	-7e-05	-4e-05		0.00130393	0.000988474	7.569e-05	0.000726302	7.88544e-05	1.13569e-05	4.9e-09	1.6e-09
13	0.03714	0.05026	0.03785	0.01655	0.00933	0.02568	0.00263	-4e-05		0.06	0.0776	0.0652	0.0427	0.0118	0.0098	0	0		-0.02286	-0.02734	-0.02735	-0.02615	-0.00247	0.01588	0.00263	-4e-05		0.00052258	0.000747476	0.000748022	0.000683823	6.1009e-06	0.000252174	6.9169e-06	1.6e-09
13.2	0.04459	0.05761	0.0466	0.01715	0.00873	0.03688	0.00498	-4e-05		0.059	0.0778	0.0734	0.044	0.0111	0.0253	0	0		-0.01441	-0.02019	-0.0268	-0.02685	-0.00237	0.01158	0.00498	-4e-05		0.000207648	0.000407636	0.00071824	0.000720922	5.6169e-06	0.000134096	2.48004e-05	1.6e-09
13.4	0.04989	0.06971	0.0498	0.02405	0.01243	0.03593	0.00293	-4e-05		0.0644	0.0787	0.0669	0.0433	0.0103	0.0255	0.0078	0		-0.01451	-0.00899	-0.0171	-0.01925	0.00213	0.01043	-0.00487	-4e-05		0.00021054	8.08201e-05	0.00029241	0.000370563	4.5369e-06	0.000108785	2.37169e-05	1.6e-09
13.6	0.06959	0.07761	0.0514	0.02615	0.01448	0.03508	0.00383	0.00116		0.0649	0.0824	0.0692	0.043	0.0118	0.0308	0.0055	0		0.00469	-0.00479	-0.0178	-0.01685	0.00268	0.00428	-0.00167	0.00116		2.19961e-05	2.29441e-05	0.00031684	0.000283922	7.1824e-06	1.83184e-05	2.7889e-06	1.3456e-06
13.8	0.07604	0.09786	0.0611	0.0335	0.01423	0.03808	0.00793	0.00371		0.0692	0.0842	0.0676	0.0463	0.0116	0.0294	0.0085	0		0.00684	0.01366	-0.0065	-0.0128	0.00263	0.00868	-0.00057	0.00371		4.67856e-05	0.000186596	4.225e-05	0.00016384	6.9169e-06	7.53424e-05	3.249e-07	1.37641e-05
14	0.07349	0.09986	0.0654	0.03585	0.01748	0.04083	0.01478	0.00296		0.0697	0.0861	0.0709	0.0477	0.032	0.0276	0.0207	0		0.00379	0.01376	-0.0055	-0.01185	-0.01452	0.01323	-0.00592	0.00296		1.43641e-05	0.000189338	3.025e-05	0.000140422	0.00021083	0.000175033	3.50464e-05	8.7616e-06
14.2	0.07234	0.09626	0.0739	0.0494	0.01353	0.03683	0.01713	0.00521		0.0694	0.0865	0.0758	0.0478	0.0325	0.0294	0.0196	0		0.00294	0.00976	-0.0019	0.0016	-0.01897	0.00743	-0.00247	0.00521		8.6436e-06	9.52576e-05	3.61e-06	2.56e-06	0.000359861	5.52049e-05	6.1009e-06	2.71441e-05
14.4	0.07174	0.07411	0.0755	0.05075	0.01613	0.03723	0.01978	0.01086		0.0706	0.0866	0.0727	0.0483	0.0312	0.0343	0.0246	0.0221		0.00114	-0.01249	0.0028	0.00245	-0.01507	0.00293	-0.00482	-0.01124		1.2996e-06	0.000156	7.84e-06	6.0025e-06	0.000227105	8.5849e-06	2.32324e-05	0.000126338
14.6	0.06834	0.06826	0.077	0.0545	0.02118	0.03538	0.02338	0.01176		0.07	0.0861	0.0737	0.0487	0.0298	0.0335	0.0258	0.019		-0.00166	-0.01784	0.0033	0.0058	-0.00862	0.00188	-0.00242	-0.00724		2.7556e-06	0.000318266	1.089e-05	3.364e-05	7.43044e-05	3.5344e-06	5.8564e-06	5.24176e-05
14.8	0.06979	0.06686	0.071	0.05585	0.02933	0.04408	0.01983	0.00971		0.0692	0.0844	0.0748	0.0493	0.0306	0.0343	0.0209	0.0128		0.00059	-0.01754	-0.0038	0.00655	-0.00127	0.00978	-0.00107	-0.00309		3.481e-07	0.000307652	1.444e-05	4.29025e-05	1.6129e-06	9.56484e-05	1.1449e-06	9.5481e-06
15	0.06729	0.05431	0.0706	0.05295	0.02458	0.04708	0.02123	0.00966		0.0693	0.0852	0.074	0.0486	0.031	0.0354	0.0281	0.0139		-0.00201	-0.03089	-0.0034	0.00435	-0.00642	0.01168	-0.00687	-0.00424		4.0401e-06	0.000954192	1.156e-05	1.89225e-05	4.12164e-05	0.000136422	4.71969e-05	1.79776e-05
15.2	0.05639	0.06126	0.0714	0.05065	0.02568	0.04873	0.02823	0.01201		0.07	0.0859	0.0723	0.0493	0.0326	0.0364	0.0275	0.0141		-0.01361	-0.02464	-0.0009	0.00135	-0.00692	0.01233	0.00073	-0.00209		0.000185232	0.00060713	8.1e-07	1.8225e-06	4.78864e-05	0.000152029	5.329e-07	4.3681e-06
15.4	0.05179	0.05901	0.07695	0.0519	0.02878	0.04558	0.02578	0.01696		0.0726	0.0871	0.0713	0.0494	0.0335	0.0369	0.0293	0.018		-0.02081	-0.02809	0.00565	0.0025	-0.00472	0.00868	-0.00352	-0.00104		0.000433056	0.000789048	3.19225e-05	6.25e-06	2.22784e-05	7.53424e-05	1.23904e-05	1.0816e-06
15.6	0.04294	0.05846	0.07595	0.06815	0.03343	0.04438	0.02938	0.01666		0.0721	0.0883	0.0718	0.0499	0.0341	0.0371	0.0301	0.0221		-0.02916	-0.02984	0.00415	0.01825	-0.00067	0.00728	-0.00072	-0.00544		0.000850306	0.000890426	1.72225e-05	0.000333063	4.489e-07	5.29984e-05	5.184e-07	2.95936e-05
15.8	0.05719	0.06526	0.0763	0.06585	0.03823	0.04713	0.02868	0.01861		0.0741	0.0892	0.0724	0.0517	0.0339	0.0386	0.0308	0.0184		-0.01691	-0.02394	0.0039	0.01415	0.00433	0.00853	-0.00212	0.00021		0.000285948	0.000573124	1.521e-05	0.000200223	1.87489e-05	7.27609e-05	4.4944e-06	4.41e-08
16	0.05904	0.06071	0.0817	0.0582	0.03218	0.05343	0.03658	0.01636		0.0732	0.0899	0.074	0.0513	0.0343	0.0412	0.0344	0.0179		-0.01416	-0.02919	0.0077	0.0069	-0.00212	0.01223	0.00218	-0.00154		0.000200506	0.000852056	5.929e-05	4.761e-05	4.4944e-06	0.000149573	4.7524e-06	2.3716e-06
16.2	0.06914	0.06146	0.0814	0.06375	0.02833	0.05068	0.03503	0.02056		0.0737	0.0894	0.0751	0.0539	0.0349	0.0446	0.0368	0.0193		-0.00456	-0.02794	0.0063	0.00985	-0.00657	0.00608	-0.00177	0.00126		2.07936e-05	0.000780644	3.969e-05	9.70225e-05	4.31649e-05	3.69664e-05	3.1329e-06	1.5876e-06
16.4	0.06989	0.07661	0.0782	0.05895	0.03993	0.05153	0.03643	0.01381		0.0735	0.0908	0.0762	0.0544	0.0366	0.0459	0.0383	0.0211		-0.00361	-0.01419	0.002	0.00455	0.00333	0.00563	-0.00187	-0.00729		1.30321e-05	0.000201356	4e-06	2.07025e-05	1.10889e-05	3.16969e-05	3.4969e-06	5.31441e-05
16.6	0.07379	0.06681	0.082	0.0592	0.04083	0.05138	0.03693	0.01701		0.0739	0.0914	0.0759	0.0559	0.0394	0.0466	0.0392	0.0214		-0.00011	-0.02459	0.0061	0.0033	0.00143	0.00478	-0.00227	-0.00439		1.21e-08	0.000604668	3.721e-05	1.089e-05	2.0449e-06	2.28484e-05	5.1529e-06	1.92721e-05
16.8	0.07604	0.08126	0.07955	0.06915	0.04373	0.05268	0.03763	0.02261		0.077	0.0911	0.0753	0.0564	0.0421	0.0469	0.0409	0.0206		-0.00096	-0.00984	0.00425	0.01275	0.00163	0.00578	-0.00327	0.00201		9.216e-07	9.68256e-05	1.80625e-05	0.000162563	2.6569e-06	3.34084e-05	1.06929e-05	4.0401e-06
17	0.07794	0.07866	0.0755	0.06865	0.04203	0.05548	0.04463	0.02211		0.0765	0.0922	0.076	0.0566	0.0437	0.0478	0.0415	0.0217		0.00144	-0.01354	-0.0005	0.01205	-0.00167	0.00768	0.00313	0.00041		2.0736e-06	0.000183332	2.5e-07	0.000145203	2.7889e-06	5.89824e-05	9.7969e-06	1.681e-07
17.2	0.07469	0.07716	0.08105	0.06565	0.03713	0.05258	0.04333	0.01911		0.0768	0.0931	0.0754	0.0579	0.0446	0.0504	0.043	0.0211		-0.00211	-0.01594	0.00565	0.00775	-0.00747	0.00218	0.00033	-0.00199		4.4521e-06	0.000254084	3.19225e-05	6.00625e-05	5.58009e-05	4.7524e-06	1.089e-07	3.9601e-06
17.4	0.07719	0.07941	0.082	0.06695	0.04623	0.05003	0.04313	0.01546		0.0777	0.0919	0.077	0.0584	0.0435	0.0519	0.0443	0.0214		-0.00051	-0.01249	0.005	0.00855	0.00273	-0.00187	-0.00117	-0.00594		2.601e-07	0.000156	2.5e-05	7.31025e-05	7.4529e-06	3.4969e-06	1.3689e-06	3.52836e-05
17.6	0.07644	0.08206	0.08045	0.06735	0.04683	0.05058	0.04453	0.02236		0.0754	0.0901	0.0786	0.0586	0.0434	0.0515	0.0439	0.0216		0.00104	-0.00804	0.00185	0.00875	0.00343	-0.00092	0.00063	0.00076		1.0816e-06	6.46416e-05	3.4225e-06	7.65625e-05	1.17649e-05	8.464e-07	3.969e-07	5.776e-07
17.8	0.07539	0.08211	0.07425	0.06775	0.04773	0.05263	0.04663	0.02091		0.0745	0.0914	0.0771	0.0575	0.0442	0.0502	0.0452	0.0218		0.00089	-0.00929	-0.00285	0.01025	0.00353	0.00243	0.00143	-0.00089		7.921e-07	8.63041e-05	8.1225e-06	0.000105063	1.24609e-05	5.9049e-06	2.0449e-06	7.921e-07
18	0.07459	0.07896	0.0725	0.0722	0.04173	0.05813	0.04513	0.01526		0.076	0.0909	0.0763	0.0575	0.0455	0.0477	0.0451	0.0235		-0.00141	-0.01194	-0.0038	0.0147	-0.00377	0.01043	3e-05	-0.00824		1.9881e-06	0.000142564	1.444e-05	0.00021609	1.42129e-05	0.000108785	9e-10	6.78976e-05
18.2	0.07589	0.07516	0.0737	0.06995	0.04483	0.06038	0.04253	0.01886		0.0771	0.0885	0.0766	0.0569	0.0482	0.0464	0.0436	0.0242		-0.00121	-0.01334	-0.0029	0.01305	-0.00337	0.01398	-0.00107	-0.00534		1.4641e-06	0.000177956	8.41e-06	0.000170302	1.13569e-05	0.00019544	1.1449e-06	2.85156e-05
18.4	0.07639	0.07616	0.07315	0.06665	0.04868	0.05143	0.04403	0.01781		0.0765	0.0876	0.0754	0.0558	0.0498	0.0472	0.0442	0.0233		-0.00011	-0.01144	-0.00225	0.01085	-0.00112	0.00423	-0.00017	-0.00549		1.21e-08	0.000130874	5.0625e-06	0.000117722	1.2544e-06	1.78929e-05	2.89e-08	3.01401e-05
18.6	0.07719	0.07821	0.0766	0.0661	0.04678	0.05363	0.05088	0.01821		0.0749	0.0876	0.0746	0.0559	0.0496	0.0489	0.0456	0.0219		0.00229	-0.00939	0.002	0.0102	-0.00282	0.00473	0.00528	-0.00369		5.2441e-06	8.81721e-05	4e-06	0.00010404	7.9524e-06	2.23729e-05	2.78784e-05	1.36161e-05
18.8	0.07559	0.07751	0.07355	0.0696	0.04058	0.05628	0.04728	0.02026		0.0747	0.0872	0.075	0.0558	0.0482	0.0507	0.046	0.0224		0.00089	-0.00969	-0.00145	0.0138	-0.00762	0.00558	0.00128	-0.00214		7.921e-07	9.38961e-05	2.1025e-06	0.00019044	5.80644e-05	3.11364e-05	1.6384e-06	4.5796e-06
19	0.07604	0.07886	0.075	0.066	0.04123	0.05663	0.04368	0.01861		0.0735	0.0877	0.0751	0.0566	0.0468	0.051	0.0461	0.0241		0.00254	-0.00884	-0.0001	0.0094	-0.00557	0.00563	-0.00242	-0.00549		6.4516e-06	7.81456e-05	1e-08	8.836e-05	3.10249e-05	3.16969e-05	5.8564e-06	3.01401e-05
19.2	0.07449	0.07701	0.07315	0.0656	0.04068	0.05543	0.04853	0.01326		0.0718	0.0864	0.075	0.0554	0.0455	0.0504	0.0466	0.0228		0.00269	-0.00939	-0.00185	0.0102	-0.00482	0.00503	0.00193	-0.00954		7.2361e-06	8.81721e-05	3.4225e-06	0.00010404	2.32324e-05	2.53009e-05	3.7249e-06	9.10116e-05
19.4	0.07524	0.08196	0.06975	0.06485	0.04548	0.04843	0.04173	0.01371		0.0726	0.0849	0.0745	0.0542	0.045	0.0493	0.0462	0.0207		0.00264	-0.00294	-0.00475	0.01065	0.00048	-0.00087	-0.00447	-0.00699		6.9696e-06	8.6436e-06	2.25625e-05	0.000113423	2.304e-07	7.569e-07	1.99809e-05	4.88601e-05
19.6	0.07454	0.08271	0.0712	0.07045	0.04978	0.04818	0.04498	0.01971		0.0722	0.0835	0.073	0.0539	0.0455	0.0484	0.0456	0.0219		0.00234	-0.00079	-0.0018	0.01655	0.00428	-0.00022	-0.00062	-0.00219		5.4756e-06	6.241e-07	3.24e-06	0.000273902	1.83184e-05	4.84e-08	3.844e-07	4.7961e-06
19.8	0.07154	0.07421	0.07345	0.0698	0.04628	0.05408	0.04433	0.02181		0.0718	0.0825	0.0714	0.0531	0.0469	0.0481	0.0453	0.0241		-0.00026	-0.00829	0.00205	0.0167	-0.00062	0.00598	-0.00097	-0.00229		6.76e-08	6.87241e-05	4.2025e-06	0.00027889	3.844e-07	3.57604e-05	9.409e-07	5.2441e-06
20	0.07534	0.07441	0.0734	0.0655	0.04163	0.05608	0.04308	0.01561		0.0711	0.0813	0.0712	0.0525	0.0483	0.0487	0.045	0.0249		0.00424	-0.00689	0.0022	0.013	-0.00667	0.00738	-0.00192	-0.00929		1.79776e-05	4.74721e-05	4.84e-06	0.000169	4.44889e-05	5.44644e-05	3.6864e-06	8.63041e-05
20.2	0.07239	0.07361	0.0747	0.0646	0.04013	0.05683	0.04483	0.01146		0.0704	0.0807	0.0721	0.0522	0.0484	0.0501	0.0451	0.0229		0.00199	-0.00709	0.0026	0.0124	-0.00827	0.00673	-0.00027	-0.01144		3.9601e-06	5.02681e-05	6.76e-06	0.00015376	6.83929e-05	4.52929e-05	7.29e-08	0.000130874
20.4	0.07379	0.06721	0.0711	0.05895	0.04153	0.05318	0.04933	0.01681		0.0698	0.0802	0.0722	0.0515	0.0476	0.0515	0.0451	0.021		0.00399	-0.01299	-0.0011	0.00745	-0.00607	0.00168	0.00423	-0.00419		1.59201e-05	0.00016874	1.21e-06	5.55025e-05	3.68449e-05	2.8224e-06	1.78929e-05	1.75561e-05
20.6	0.07119	0.07326	0.06915	0.0593	0.04378	0.05418	0.05028	0.02081		0.0686	0.0791	0.0714	0.0511	0.0468	0.0516	0.046	0.0215		0.00259	-0.00584	-0.00225	0.0082	-0.00302	0.00258	0.00428	-0.00069		6.7081e-06	3.41056e-05	5.0625e-06	6.724e-05	9.1204e-06	6.6564e-06	1.83184e-05	4.761e-07
20.8	0.06954	0.06861	0.067	0.06415	0.04213	0.04708	0.04323	0.02661		0.0686	0.079	0.0712	0.0509	0.0464	0.0507	0.047	0.022		0.00094	-0.01039	-0.0042	0.01325	-0.00427	-0.00362	-0.00377	0.00461		8.836e-07	0.000107952	1.764e-05	0.000175562	1.82329e-05	1.31044e-05	1.42129e-05	2.12521e-05
21	0.07104	0.06891	0.0694	0.0638	0.03858	0.04653	0.04183	0.01881		0.0683	0.0788	0.0704	0.0504	0.0465	0.049	0.0466	0.0225		0.00274	-0.00989	-0.001	0.0134	-0.00792	-0.00247	-0.00477	-0.00369		7.5076e-06	9.78121e-05	1e-06	0.00017956	6.27264e-05	6.1009e-06	2.27529e-05	1.36161e-05
21.2	0.06999	0.07491	0.0691	0.0642	0.03958	0.05513	0.03598	0.01566		0.0684	0.0778	0.0694	0.0501	0.0469	0.0479	0.0459	0.0227		0.00159	-0.00289	-0.0003	0.0141	-0.00732	0.00723	-0.00992	-0.00704		2.5281e-06	8.3521e-06	9e-08	0.00019881	5.35824e-05	5.22729e-05	9.84064e-05	4.95616e-05
21.4	0.07214	0.07586	0.07055	0.06075	0.03943	0.05383	0.04308	0.01196		0.0684	0.0774	0.0689	0.0498	0.0467	0.0479	0.0453	0.0205		0.00374	-0.00154	0.00165	0.01095	-0.00727	0.00593	-0.00222	-0.00854		1.39876e-05	2.3716e-06	2.7225e-06	0.000119903	5.28529e-05	3.51649e-05	4.9284e-06	7.29316e-05
21.6	0.06904	0.07771	0.06605	0.06015	0.04333	0.05838	0.04688	0.02446		0.0677	0.0776	0.0686	0.0492	0.0459	0.0485	0.0449	0.0208		0.00134	0.00011	-0.00255	0.01095	-0.00257	0.00988	0.00198	0.00366		1.7956e-06	1.21e-08	6.5025e-06	0.000119903	6.6049e-06	9.76144e-05	3.9204e-06	1.33956e-05
21.8	0.07029	0.07616	0.06255	0.0651	0.04113	0.06003	0.03923	0.02151		0.0671	0.0764	0.0688	0.0487	0.0449	0.0489	0.0449	0.0209		0.00319	-0.00024	-0.00625	0.0164	-0.00377	0.01113	-0.00567	0.00061		1.01761e-05	5.76e-08	3.90625e-05	0.00026896	1.42129e-05	0.000123877	3.21489e-05	3.721e-07
22	0.07089	0.07106	0.06435	0.0636	0.04313	0.05838	0.04068	0.01936		0.0663	0.0757	0.069	0.0484	0.0444	0.0487	0.0444	0.0209		0.00459	-0.00464	-0.00465	0.0152	-0.00127	0.00968	-0.00372	-0.00154		2.10681e-05	2.15296e-05	2.16225e-05	0.00023104	1.6129e-06	9.37024e-05	1.38384e-05	2.3716e-06
22.2	0.06834	0.07046	0.066	0.0598	0.04088	0.05353	0.04358	0.01711		0.0652	0.0759	0.0681	0.0483	0.0447	0.0487	0.0433	0.0229		0.00314	-0.00544	-0.0021	0.0115	-0.00382	0.00483	0.00028	-0.00579		9.8596e-06	2.95936e-05	4.41e-06	0.00013225	1.45924e-05	2.33289e-05	7.84e-08	3.35241e-05
22.4	0.06949	0.06626	0.0657	0.05925	0.04278	0.05308	0.04333	0.01441		0.0653	0.0759	0.0672	0.0474	0.0454	0.0485	0.043	0.0217		0.00419	-0.00964	-0.0015	0.01185	-0.00262	0.00458	0.00033	-0.00729		1.75561e-05	9.29296e-05	2.25e-06	0.000140422	6.8644e-06	2.09764e-05	1.089e-07	5.31441e-05
22.6	0.07089	0.06746	0.06935	0.05665	0.03878	0.05078	0.04423	0.02361		0.0656	0.0752	0.0667	0.0475	0.0456	0.0477	0.0427	0.0204		0.00529	-0.00774	0.00265	0.00915	-0.00682	0.00308	0.00153	0.00321		2.79841e-05	5.99076e-05	7.0225e-06	8.37225e-05	4.65124e-05	9.4864e-06	2.3409e-06	1.03041e-05
22.8	0.06644	0.07401	0.0648	0.0571	0.04023	0.05058	0.04053	0.01746		0.0656	0.0745	0.0663	0.0474	0.0453	0.0471	0.043	0.0209		0.00084	-0.00049	-0.0015	0.0097	-0.00507	0.00348	-0.00247	-0.00344		7.056e-07	2.401e-07	2.25e-06	9.409e-05	2.57049e-05	1.21104e-05	6.1009e-06	1.18336e-05
23	0.06524	0.07656	0.0654	0.05625	0.03798	0.05318	0.04303	0.01061		0.0652	0.074	0.0658	0.0465	0.0442	0.047	0.0438	0.0213		4e-05	0.00256	-0.0004	0.00975	-0.00622	0.00618	-0.00077	-0.01069		1.6e-09	6.5536e-06	1.6e-07	9.50625e-05	3.86884e-05	3.81924e-05	5.929e-07	0.000114276
23.2	0.06684	0.06801	0.0666	0.05545	0.03818	0.05503	0.04333	0.01031		0.0648	0.0737	0.0651	0.0466	0.0429	0.0476	0.044	0.0216		0.00204	-0.00569	0.0015	0.00885	-0.00472	0.00743	-0.00067	-0.01129		4.1616e-06	3.23761e-05	2.25e-06	7.83225e-05	2.22784e-05	5.52049e-05	4.489e-07	0.000127464
23.4	0.06749	0.06561	0.0653	0.05875	0.03633	0.05293	0.04268	0.02256		0.064	0.0737	0.0648	0.0466	0.0421	0.0481	0.0437	0.0209		0.00349	-0.00809	0.0005	0.01215	-0.00577	0.00483	-0.00102	0.00166		1.21801e-05	6.54481e-05	2.5e-07	0.000147622	3.32929e-05	2.33289e-05	1.0404e-06	2.7556e-06
23.6	0.06504	0.07021	0.06115	0.0582	0.03853	0.05563	0.04208	0.02041		0.0633	0.0738	0.0643	0.0464	0.0423	0.0481	0.0436	0.0196		0.00174	-0.00359	-0.00315	0.0118	-0.00377	0.00753	-0.00152	0.00081		3.0276e-06	1.28881e-05	9.9225e-06	0.00013924	1.42129e-05	5.67009e-05	2.3104e-06	6.561e-07
23.8	0.06874	0.07411	0.06305	0.0586	0.04158	0.05278	0.04243	0.01661		0.0626	0.0729	0.0638	0.0463	0.0429	0.0477	0.0435	0.0197		0.00614	0.00121	-0.00075	0.0123	-0.00132	0.00508	-0.00107	-0.00309		3.76996e-05	1.4641e-06	5.625e-07	0.00015129	1.7424e-06	2.58064e-05	1.1449e-06	9.5481e-06
24	0.06689	0.06471	0.06545	0.05555	0.04188	0.05123	0.03843	0.00986		0.0624	0.0721	0.0635	0.0459	0.0438	0.0475	0.0435	0.0216		0.00449	-0.00739	0.00195	0.00965	-0.00192	0.00373	-0.00507	-0.01174		2.01601e-05	5.46121e-05	3.8025e-06	9.31225e-05	3.6864e-06	1.39129e-05	2.57049e-05	0.000137828
24.2	0.06409	0.06531	0.06645	0.0547	0.03703	0.04948	0.04063	0.01856		0.062	0.0715	0.0632	0.0454	0.0444	0.0475	0.0433	0.0226		0.00209	-0.00619	0.00325	0.0093	-0.00737	0.00198	-0.00267	-0.00404		4.3681e-06	3.83161e-05	1.05625e-05	8.649e-05	5.43169e-05	3.9204e-06	7.1289e-06	1.63216e-05
24.4	0.06729	0.06831	0.06305	0.06185	0.03923	0.04773	0.04248	0.02091		0.0616	0.0712	0.0628	0.0454	0.0446	0.0475	0.0434	0.0223		0.00569	-0.00289	0.00025	0.01645	-0.00537	0.00023	-0.00092	-0.00139		3.23761e-05	8.3521e-06	6.25e-08	0.000270603	2.88369e-05	5.29e-08	8.464e-07	1.9321e-06
24.6	0.06259	0.06556	0.06345	0.05655	0.03968	0.04873	0.04198	0.01986		0.0612	0.0705	0.0624	0.0452	0.0444	0.0472	0.0438	0.0211		0.00139	-0.00494	0.00105	0.01135	-0.00472	0.00153	-0.00182	-0.00124		1.9321e-06	2.44036e-05	1.1025e-06	0.000128823	2.22784e-05	2.3409e-06	3.3124e-06	1.5376e-06
24.8	0.06304	0.06886	0.064	0.0549	0.04048	0.05008	0.03963	0.01441		0.0611	0.0697	0.0619	0.0451	0.0437	0.0469	0.0441	0.0209		0.00194	-0.00084	0.0021	0.0098	-0.00322	0.00318	-0.00447	-0.00649		3.7636e-06	7.056e-07	4.41e-06	9.604e-05	1.03684e-05	1.01124e-05	1.99809e-05	4.21201e-05
25	0.06314	0.06851	0.06165	0.05555	0.04273	0.04753	0.03973	0.01156		0.0607	0.0695	0.0615	0.0448	0.0429	0.0466	0.0442	0.0215		0.00244	-0.00099	0.00015	0.01075	-0.00017	0.00093	-0.00447	-0.00994		5.9536e-06	9.801e-07	2.25e-08	0.000115563	2.89e-08	8.649e-07	1.99809e-05	9.88036e-05
25.2	0.06334	0.06691	0.06295	0.0543	0.04158	0.04593	0.04303	0.01546		0.0601	0.0694	0.0608	0.0447	0.042	0.0465	0.0438	0.0215		0.00324	-0.00249	0.00215	0.0096	-0.00042	-0.00057	-0.00077	-0.00604		1.04976e-05	6.2001e-06	4.6225e-06	9.216e-05	1.764e-07	3.249e-07	5.929e-07	3.64816e-05
25.4	0.06584	0.06811	0.0639	0.0556	0.03848	0.04703	0.03958	0.01661		0.06	0.0691	0.0601	0.0445	0.0414	0.0464	0.0431	0.0218		0.00584	-0.00099	0.0038	0.0111	-0.00292	0.00063	-0.00352	-0.00519		3.41056e-05	9.801e-07	1.444e-05	0.00012321	8.5264e-06	3.969e-07	1.23904e-05	2.69361e-05
25.6	0.06379	0.06956	0.06485	0.0544	0.03748	0.04748	0.03928	0.01271		0.0596	0.0691	0.0597	0.0447	0.0411	0.0464	0.0427	0.0214		0.00419	0.00046	0.00515	0.0097	-0.00362	0.00108	-0.00342	-0.00869		1.75561e-05	2.116e-07	2.65225e-05	9.409e-05	1.31044e-05	1.1664e-06	1.16964e-05	7.55161e-05
25.8	0.06579	0.07061	0.06335	0.0578	0.03753	0.05143	0.04078	0.00901		0.0597	0.0691	0.0596	0.0446	0.0411	0.0464	0.0426	0.0208		0.00609	0.00151	0.00375	0.0132	-0.00357	0.00503	-0.00182	-0.01179		3.70881e-05	2.2801e-06	1.40625e-05	0.00017424	1.27449e-05	2.53009e-05	3.3124e-06	0.000139004
26	0.06299	0.07181	0.05995	0.05645	0.03908	0.04698	0.03908	0.01261		0.0591	0.0683	0.0599	0.044	0.0414	0.0467	0.0424	0.0212		0.00389	0.00351	5e-05	0.01245	-0.00232	0.00028	-0.00332	-0.00859		1.51321e-05	1.23201e-05	2.5e-09	0.000155003	5.3824e-06	7.84e-08	1.10224e-05	7.37881e-05
26.2	0.06134	0.06631	0.0583	0.0556	0.04018	0.05188	0.04173	0.02541		0.0592	0.0673	0.0599	0.044	0.0419	0.0471	0.0421	0.022		0.00214	-0.00099	-0.0016	0.0116	-0.00172	0.00478	-0.00037	0.00341		4.5796e-06	9.801e-07	2.56e-06	0.00013456	2.9584e-06	2.28484e-05	1.369e-07	1.16281e-05
26.4	0.06489	0.06786	0.0603	0.0546	0.03793	0.05023	0.04013	0.02116		0.0589	0.0667	0.0594	0.0438	0.0423	0.0471	0.0422	0.0222		0.00599	0.00116	0.0009	0.0108	-0.00437	0.00313	-0.00207	-0.00104		3.58801e-05	1.3456e-06	8.1e-07	0.00011664	1.90969e-05	9.7969e-06	4.2849e-06	1.0816e-06
26.6	0.06294	0.06696	0.06205	0.0532	0.03788	0.04638	0.04148	0.01801		0.0589	0.0667	0.0587	0.0435	0.0427	0.0466	0.0425	0.0214		0.00404	0.00026	0.00335	0.0097	-0.00482	-0.00022	-0.00102	-0.00339		1.63216e-05	6.76e-08	1.12225e-05	9.409e-05	2.32324e-05	4.84e-08	1.0404e-06	1.14921e-05
26.8	0.06299	0.06601	0.064	0.055	0.03958	0.04783	0.03673	0.01386		0.0589	0.0665	0.0582	0.0432	0.0422	0.0457	0.0428	0.021		0.00409	-0.00049	0.0058	0.0118	-0.00262	0.00213	-0.00607	-0.00714		1.67281e-05	2.401e-07	3.364e-05	0.00013924	6.8644e-06	4.5369e-06	3.68449e-05	5.09796e-05
27	0.06019	0.06451	0.0634	0.05575	0.03518	0.05033	0.03768	0.01056		0.0587	0.0657	0.0582	0.0429	0.0413	0.045	0.0426	0.0212		0.00149	-0.00119	0.0052	0.01285	-0.00612	0.00533	-0.00492	-0.01064		2.2201e-06	1.4161e-06	2.704e-05	0.000165123	3.74544e-05	2.84089e-05	2.42064e-05	0.00011321
27.2	0.06329	0.06651	0.06065	0.0565	0.03548	0.04803	0.03853	0.01131		0.0587	0.0653	0.0583	0.0425	0.0403	0.0449	0.0424	0.0215		0.00459	0.00121	0.00235	0.014	-0.00482	0.00313	-0.00387	-0.01019		2.10681e-05	1.4641e-06	5.5225e-06	0.000196	2.32324e-05	9.7969e-06	1.49769e-05	0.000103836
27.4	0.06294	0.07146	0.059	0.05265	0.04243	0.04448	0.04033	0.02361		0.0581	0.0649	0.0584	0.0424	0.0397	0.0451	0.042	0.0213		0.00484	0.00656	0.0006	0.01025	0.00273	-0.00062	-0.00167	0.00231		2.34256e-05	4.30336e-05	3.6e-07	0.000105063	7.4529e-06	3.844e-07	2.7889e-06	5.3361e-06
27.6	0.06299	0.06906	0.057	0.0579	0.04318	0.04998	0.04143	0.02091		0.058	0.0646	0.0583	0.0418	0.0397	0.0453	0.0417	0.0216		0.00499	0.00446	-0.0013	0.0161	0.00348	0.00468	-0.00027	-0.00069		2.49001e-05	1.98916e-05	1.69e-06	0.00025921	1.21104e-05	2.19024e-05	7.29e-08	4.761e-07
27.8	0.06239	0.06886	0.0605	0.05525	0.03993	0.04673	0.04283	0.01656		0.058	0.0644	0.0579	0.0417	0.04	0.0452	0.0416	0.0214		0.00439	0.00446	0.0026	0.01355	-7e-05	0.00153	0.00123	-0.00484		1.92721e-05	1.98916e-05	6.76e-06	0.000183602	4.9e-09	2.3409e-06	1.5129e-06	2.34256e-05
28	0.06404	0.06856	0.06275	0.0527	0.03428	0.04978	0.03853	0.01276		0.0572	0.0645	0.0574	0.0419	0.0404	0.0449	0.0411	0.0214		0.00684	0.00406	0.00535	0.0108	-0.00612	0.00488	-0.00257	-0.00864		4.67856e-05	1.64836e-05	2.86225e-05	0.00011664	3.74544e-05	2.38144e-05	6.6049e-06	7.46496e-05
28.2	0.06169	0.06641	0.06405	0.05005	0.03418	0.05063	0.03998	0.00746		0.057	0.0641	0.0573	0.0417	0.0404	0.0449	0.0408	0.0216		0.00469	0.00231	0.00675	0.00835	-0.00622	0.00573	-0.00082	-0.01414		2.19961e-05	5.3361e-06	4.55625e-05	6.97225e-05	3.86884e-05	3.28329e-05	6.724e-07	0.00019994
28.4	0.06004	0.06286	0.06325	0.0526	0.03418	0.04833	0.03833	0.00946		0.0566	0.0635	0.0576	0.0413	0.0402	0.0448	0.0408	0.0214		0.00344	-0.00064	0.00565	0.0113	-0.00602	0.00353	-0.00247	-0.01194		1.18336e-05	4.096e-07	3.19225e-05	0.00012769	3.62404e-05	1.24609e-05	6.1009e-06	0.000142564
28.6	0.05939	0.06936	0.0601	0.05085	0.03418	0.04778	0.03708	0.01516		0.0561	0.0634	0.0571	0.0412	0.04	0.0448	0.0405	0.0214		0.00329	0.00596	0.003	0.00965	-0.00582	0.00298	-0.00342	-0.00624		1.08241e-05	3.55216e-05	9e-06	9.31225e-05	3.38724e-05	8.8804e-06	1.16964e-05	3.89376e-05
28.8	0.06219	0.06751	0.05775	0.0501	0.03938	0.04938	0.03743	0.01401		0.0561	0.0633	0.0568	0.0411	0.0396	0.0443	0.0404	0.0213		0.00609	0.00421	0.00095	0.009	-0.00022	0.00508	-0.00297	-0.00729		3.70881e-05	1.77241e-05	9.025e-07	8.1e-05	4.84e-08	2.58064e-05	8.8209e-06	5.31441e-05
29	0.06069	0.06206	0.05935	0.05175	0.03888	0.04838	0.03898	0.01561		0.0566	0.0635	0.0566	0.041	0.0391	0.044	0.0403	0.021		0.00409	-0.00144	0.00275	0.01075	-0.00022	0.00438	-0.00132	-0.00539		1.67281e-05	2.0736e-06	7.5625e-06	0.000115562	4.84e-08	1.91844e-05	1.7424e-06	2.90521e-05
29.2	0.06314	0.06301	0.0613	0.05005	0.03508	0.04573	0.03853	0.01301		0.0564	0.0643	0.0567	0.0412	0.0386	0.0437	0.0399	0.0209		0.00674	-0.00129	0.0046	0.00885	-0.00352	0.00203	-0.00137	-0.00789		4.54276e-05	1.6641e-06	2.116e-05	7.83225e-05	1.23904e-05	4.1209e-06	1.8769e-06	6.22521e-05
29.4	0.06064	0.06686	0.0637	0.0537	0.03593	0.04753	0.03733	0.02181		0.0565	0.0648	0.057	0.0413	0.0384	0.0436	0.0397	0.0212		0.00414	0.00206	0.0067	0.0124	-0.00247	0.00393	-0.00237	0.00061		1.71396e-05	4.2436e-06	4.489e-05	0.00015376	6.1009e-06	1.54449e-05	5.6169e-06	3.721e-07
29.6	0.06234	0.06481	0.06135	0.0565	0.03823	0.04803	0.03838	0.02346		0.0566	0.0644	0.0577	0.0408	0.0382	0.0434	0.0393	0.0215		0.00574	0.00041	0.00365	0.0157	3e-05	0.00463	-0.00092	0.00196		3.29476e-05	1.681e-07	1.33225e-05	0.00024649	9e-10	2.14369e-05	8.464e-07	3.8416e-06
29.8	0.06029	0.06621	0.0586	0.0554	0.03523	0.04328	0.03968	0.01241		0.0568	0.0637	0.0579	0.0408	0.0384	0.0435	0.0392	0.0215		0.00349	0.00251	0.0007	0.0146	-0.00317	-0.00022	0.00048	-0.00909		1.21801e-05	6.3001e-06	4.9e-07	0.00021316	1.00489e-05	4.84e-08	2.304e-07	8.26281e-05
30	0.06069	0.07081	0.059	0.0541	0.03268	0.04773	0.03883	0.01116		0.0567	0.0638	0.0574	0.0407	0.0387	0.0438	0.0396	0.0212		0.00399	0.00701	0.0016	0.0134	-0.00602	0.00393	-0.00077	-0.01004		1.59201e-05	4.91401e-05	2.56e-06	0.00017956	3.62404e-05	1.54449e-05	5.929e-07	0.000100802
30.2	0.05919	0.06966	0.0587	0.0551	0.03278	0.04713	0.03603	0.00761		0.0566	0.0639	0.057	0.0407	0.0389	0.0438	0.04	0.0212		0.00259	0.00576	0.0017	0.0144	-0.00612	0.00333	-0.00397	-0.01359		6.7081e-06	3.31776e-05	2.89e-06	0.00020736	3.74544e-05	1.10889e-05	1.57609e-05	0.000184688
30.4	0.06124	0.06806	0.0604	0.0514	0.03163	0.04573	0.04023	0.00826		0.0568	0.0642	0.0568	0.0404	0.0387	0.0433	0.0404	0.0213		0.00444	0.00386	0.0036	0.011	-0.00707	0.00243	-0.00017	-0.01304		1.97136e-05	1.48996e-05	1.296e-05	0.000121	4.99849e-05	5.9049e-06	2.89e-08	0.000170042
30.6	0.06099	0.07406	0.06385	0.0449	0.03563	0.04663	0.03308	0.02626		0.0568	0.0641	0.0568	0.0405	0.0386	0.0428	0.0404	0.0215		0.00419	0.00996	0.00705	0.0044	-0.00297	0.00383	-0.00732	0.00476		1.75561e-05	9.92016e-05	4.97025e-05	1.936e-05	8.8209e-06	1.46689e-05	5.35824e-05	2.26576e-05
30.8	0.05879	0.07251	0.06285	0.0483	0.03313	0.04658	0.03628	0.02426		0.0565	0.0639	0.0574	0.0404	0.0386	0.0429	0.04	0.0214		0.00229	0.00861	0.00545	0.0079	-0.00547	0.00368	-0.00372	0.00286		5.2441e-06	7.41321e-05	2.97025e-05	6.241e-05	2.99209e-05	1.35424e-05	1.38384e-05	8.1796e-06
31	0.05894	0.06786	0.06245	0.0494	0.03633	0.04418	0.03548	0.01776		0.0563	0.0636	0.0577	0.0405	0.0387	0.0433	0.0397	0.021		0.00264	0.00426	0.00475	0.0089	-0.00237	0.00088	-0.00422	-0.00324		6.9696e-06	1.81476e-05	2.25625e-05	7.921e-05	5.6169e-06	7.744e-07	1.78084e-05	1.04976e-05
31.2	0.06084	0.06436	0.061	0.0533	0.03703	0.04543	0.04013	0.01721		0.0566	0.0635	0.0578	0.0403	0.0388	0.0436	0.0395	0.0211		0.00424	0.00086	0.0032	0.013	-0.00177	0.00183	0.00063	-0.00389		1.79776e-05	7.396e-07	1.024e-05	0.000169	3.1329e-06	3.3489e-06	3.969e-07	1.51321e-05
31.4	0.05644	0.05711	0.05775	0.05125	0.03813	0.04293	0.03643	0.01606		0.0571	0.0635	0.0578	0.0402	0.0391	0.0434	0.0396	0.0213		-0.00066	-0.00639	-5e-05	0.01105	-0.00097	-0.00047	-0.00317	-0.00524		4.356e-07	4.08321e-05	2.5e-09	0.000122102	9.409e-07	2.209e-07	1.00489e-05	2.74576e-05
31.6	0.06264	0.05946	0.0581	0.05115	0.03368	0.04613	0.03673	0.01496		0.0572	0.0627	0.0583	0.0401	0.0391	0.0429	0.0395	0.0217		0.00544	-0.00324	-0.0002	0.01105	-0.00542	0.00323	-0.00277	-0.00674		2.95936e-05	1.04976e-05	4e-08	0.000122103	2.93764e-05	1.04329e-05	7.6729e-06	4.54276e-05
31.8	0.06129	0.06341	0.0591	0.04875	0.03538	0.04543	0.03718	0.01491		0.057	0.0619	0.0585	0.0401	0.0389	0.0427	0.0393	0.0217		0.00429	0.00151	0.0006	0.00865	-0.00352	0.00273	-0.00212	-0.00679		1.84041e-05	2.2801e-06	3.6e-07	7.48225e-05	1.23904e-05	7.4529e-06	4.4944e-06	4.61041e-05
32	0.05809	0.06101	0.06125	0.04785	0.03333	0.04638	0.03648	0.01416		0.0565	0.0619	0.0585	0.04	0.0386	0.0427	0.0391	0.0213		0.00159	-0.00089	0.00275	0.00785	-0.00527	0.00368	-0.00262	-0.00714		2.5281e-06	7.921e-07	7.5625e-06	6.16225e-05	2.77729e-05	1.35424e-05	6.8644e-06	5.09796e-05
32.2	0.06084	0.06261	0.06205	0.04615	0.03778	0.04298	0.03503	0.00961		0.056	0.0618	0.0584	0.0399	0.0383	0.0428	0.039	0.021		0.00484	0.00081	0.00365	0.00625	-0.00052	0.00018	-0.00397	-0.01139		2.34256e-05	6.561e-07	1.33225e-05	3.90625e-05	2.704e-07	3.24e-08	1.57609e-05	0.000129732
32.4	0.05939	0.06466	0.05905	0.0488	0.03513	0.04193	0.03713	0.01246		0.0559	0.0609	0.0583	0.0395	0.038	0.0424	0.039	0.0211		0.00349	0.00376	0.00075	0.0093	-0.00287	-0.00047	-0.00187	-0.00864		1.21801e-05	1.41376e-05	5.625e-07	8.649e-05	8.2369e-06	2.209e-07	3.4969e-06	7.46496e-05
32.6	0.05629	0.05971	0.05825	0.04965	0.03783	0.03873	0.03878	0.01946		0.0556	0.0602	0.0576	0.0392	0.0376	0.0421	0.039	0.0215		0.00069	-0.00049	0.00065	0.01045	0.00023	-0.00337	-0.00022	-0.00204		4.761e-07	2.401e-07	4.225e-07	0.000109203	5.29e-08	1.13569e-05	4.84e-08	4.1616e-06
32.8	0.05954	0.05881	0.0581	0.05185	0.03383	0.03753	0.03728	0.01731		0.0551	0.06	0.0571	0.0389	0.0373	0.042	0.0388	0.0216		0.00444	-0.00119	0.001	0.01295	-0.00347	-0.00447	-0.00152	-0.00429		1.97136e-05	1.4161e-06	1e-06	0.000167703	1.20409e-05	1.99809e-05	2.3104e-06	1.84041e-05
33	0.05949	0.06081	0.05775	0.0469	0.03518	0.04623	0.03553	0.01386		0.0549	0.0599	0.0569	0.0384	0.037	0.0421	0.0384	0.0211		0.00459	0.00091	0.00085	0.0085	-0.00182	0.00413	-0.00287	-0.00724		2.10681e-05	8.281e-07	7.225e-07	7.225e-05	3.3124e-06	1.70569e-05	8.2369e-06	5.24176e-05
33.2	0.05784	0.06086	0.06155	0.0436	0.03723	0.04908	0.03418	0.01136		0.0547	0.0594	0.0567	0.0382	0.0369	0.042	0.038	0.0205		0.00314	0.00146	0.00485	0.0054	0.00033	0.00708	-0.00382	-0.00914		9.8596e-06	2.1316e-06	2.35225e-05	2.916e-05	1.089e-07	5.01264e-05	1.45924e-05	8.35396e-05
33.4	0.05749	0.05826	0.0614	0.04975	0.03063	0.04433	0.03273	0.01271		0.0546	0.0591	0.0562	0.0379	0.037	0.0416	0.0378	0.0206		0.00289	-0.00084	0.0052	0.01185	-0.00637	0.00273	-0.00507	-0.00789		8.3521e-06	7.056e-07	2.704e-05	0.000140422	4.05769e-05	7.4529e-06	2.57049e-05	6.22521e-05
33.6	0.05869	0.05941	0.0599	0.0507	0.03303	0.04558	0.03343	0.01451		0.054	0.0591	0.0559	0.0381	0.0371	0.0411	0.0378	0.021		0.00469	0.00031	0.004	0.0126	-0.00407	0.00448	-0.00437	-0.00649		2.19961e-05	9.61e-08	1.6e-05	0.00015876	1.65649e-05	2.00704e-05	1.90969e-05	4.21201e-05
33.8	0.05789	0.06196	0.0562	0.05495	0.03573	0.04623	0.03643	0.01201		0.0534	0.0589	0.0558	0.0379	0.0371	0.0409	0.0379	0.021		0.00449	0.00306	0.0004	0.01705	-0.00137	0.00533	-0.00147	-0.00899		2.01601e-05	9.3636e-06	1.6e-07	0.000290702	1.8769e-06	2.84089e-05	2.1609e-06	8.08201e-05
34	0.05869	0.06201	0.05495	0.053	0.03348	0.05058	0.03898	0.01141		0.0532	0.0592	0.0558	0.0378	0.0368	0.0408	0.038	0.0207		0.00549	0.00281	-0.00085	0.0152	-0.00332	0.00978	0.00098	-0.00929		3.01401e-05	7.8961e-06	7.225e-07	0.00023104	1.10224e-05	9.56484e-05	9.604e-07	8.63041e-05
34.2	0.05759	0.06296	0.05585	0.04575	0.03193	0.04323	0.03298	0.00926		0.0531	0.0591	0.0556	0.038	0.0363	0.0408	0.0378	0.0201		0.00449	0.00386	0.00025	0.00775	-0.00437	0.00243	-0.00482	-0.01084		2.01601e-05	1.48996e-05	6.25e-08	6.00625e-05	1.90969e-05	5.9049e-06	2.32324e-05	0.000117506
34.4	0.05779	0.06546	0.05825	0.0451	0.03473	0.04303	0.03703	0.00816		0.0529	0.0592	0.0556	0.0379	0.0359	0.0409	0.0377	0.02		0.00489	0.00626	0.00265	0.0072	-0.00117	0.00213	-0.00067	-0.01184		2.39121e-05	3.91876e-05	7.0225e-06	5.184e-05	1.3689e-06	4.5369e-06	4.489e-07	0.000140186
34.6	0.05919	0.06406	0.0602	0.0392	0.02983	0.04383	0.03423	0.01901		0.0528	0.0591	0.0553	0.0379	0.0356	0.041	0.0378	0.0203		0.00639	0.00496	0.0049	0.0013	-0.00577	0.00283	-0.00357	-0.00129		4.08321e-05	2.46016e-05	2.401e-05	1.69e-06	3.32929e-05	8.0089e-06	1.27449e-05	1.6641e-06
34.8	0.05539	0.06166	0.06055	0.04535	0.02943	0.04098	0.03433	0.01596		0.0533	0.0584	0.0554	0.0377	0.0355	0.0409	0.0376	0.0205		0.00209	0.00326	0.00515	0.00765	-0.00607	8e-05	-0.00327	-0.00454		4.3681e-06	1.06276e-05	2.65225e-05	5.85225e-05	3.68449e-05	6.4e-09	1.06929e-05	2.06116e-05
35	0.05629	0.06231	0.0587	0.0472	0.04018	0.04173	0.03213	0.01416		0.0533	0.0584	0.0552	0.0379	0.0357	0.0407	0.0372	0.0206		0.00299	0.00391	0.0035	0.0093	0.00448	0.00103	-0.00507	-0.00644		8.9401e-06	1.52881e-05	1.225e-05	8.649e-05	2.00704e-05	1.0609e-06	2.57049e-05	4.14736e-05
35.2	0.05574	0.06156	0.056	0.0483	0.03688	0.04508	0.03708	0.01181		0.053	0.0581	0.0547	0.0377	0.036	0.0403	0.0369	0.0205		0.00274	0.00346	0.0013	0.0106	0.00088	0.00478	0.00018	-0.00869		7.5076e-06	1.19716e-05	1.69e-06	0.00011236	7.744e-07	2.28484e-05	3.24e-08	7.55161e-05
35.4	0.05394	0.06031	0.05325	0.05325	0.03668	0.04513	0.03883	0.00906		0.0531	0.058	0.0544	0.0374	0.0362	0.04	0.0368	0.0201		0.00084	0.00231	-0.00115	0.01585	0.00048	0.00513	0.00203	-0.01104		7.056e-07	5.3361e-06	1.3225e-06	0.000251222	2.304e-07	2.63169e-05	4.1209e-06	0.000121882
35.6	0.05269	0.06021	0.05245	0.0504	0.03338	0.04743	0.03358	0.00841		0.053	0.0578	0.0539	0.0373	0.0361	0.0399	0.037	0.02		-0.00031	0.00241	-0.00145	0.0131	-0.00272	0.00753	-0.00342	-0.01159		9.61e-08	5.8081e-06	2.1025e-06	0.00017161	7.3984e-06	5.67009e-05	1.16964e-05	0.000134328
35.8	0.05499	0.05776	0.0578	0.0475	0.03283	0.04673	0.03438	0.01136		0.0532	0.0577	0.0539	0.0372	0.0359	0.0398	0.0372	0.02		0.00179	6e-05	0.0039	0.0103	-0.00307	0.00693	-0.00282	-0.00864		3.2041e-06	3.6e-09	1.521e-05	0.00010609	9.4249e-06	4.80249e-05	7.9524e-06	7.46496e-05
36	0.05424	0.05836	0.06235	0.04125	0.03028	0.04493	0.03118	0.01271		0.0528	0.057	0.054	0.0371	0.0356	0.0399	0.0371	0.0203		0.00144	0.00136	0.00835	0.00415	-0.00532	0.00503	-0.00592	-0.00759		2.0736e-06	1.8496e-06	6.97225e-05	1.72225e-05	2.83024e-05	2.53009e-05	3.50464e-05	5.76081e-05
36.2	0.05639	0.05996	0.0619	0.04245	0.02933	0.04213	0.03298	0.01201		0.0528	0.0568	0.0541	0.0368	0.0353	0.0399	0.0369	0.0204		0.00359	0.00316	0.0078	0.00565	-0.00597	0.00223	-0.00392	-0.00839		1.28881e-05	9.9856e-06	6.084e-05	3.19225e-05	3.56409e-05	4.9729e-06	1.53664e-05	7.03921e-05
36.4	0.05639	0.05716	0.05645	0.04335	0.03388	0.04038	0.03208	0.01096		0.0525	0.0564	0.0537	0.0367	0.0353	0.04	0.0365	0.0202		0.00389	0.00076	0.00275	0.00665	-0.00142	0.00038	-0.00442	-0.00924		1.51321e-05	5.776e-07	7.5625e-06	4.42225e-05	2.0164e-06	1.444e-07	1.95364e-05	8.53776e-05
36.6	0.05454	0.05821	0.0542	0.0417	0.03768	0.03943	0.03483	0.00936		0.0525	0.0561	0.0537	0.0366	0.0354	0.0399	0.0363	0.0198		0.00204	0.00211	0.0005	0.0051	0.00228	-0.00047	-0.00147	-0.01044		4.1616e-06	4.4521e-06	2.5e-07	2.601e-05	5.1984e-06	2.209e-07	2.1609e-06	0.000108994
36.8	0.05514	0.06226	0.05205	0.0453	0.04013	0.03923	0.02898	0.01001		0.052	0.0562	0.0536	0.0364	0.0356	0.0397	0.0362	0.0198		0.00314	0.00606	-0.00155	0.0089	0.00453	-0.00047	-0.00722	-0.00979		9.8596e-06	3.67236e-05	2.4025e-06	7.921e-05	2.05209e-05	2.209e-07	5.21284e-05	9.58441e-05
37	0.05299	0.06066	0.05385	0.04555	0.03893	0.04408	0.03513	0.01616		0.0516	0.0559	0.0537	0.0365	0.0355	0.0395	0.0362	0.0202		0.00139	0.00476	0.00015	0.00905	0.00343	0.00458	-0.00107	-0.00404		1.9321e-06	2.26576e-05	2.25e-08	8.19025e-05	1.17649e-05	2.09764e-05	1.1449e-06	1.63216e-05
37.2	0.05514	0.05941	0.0544	0.04455	0.02963	0.04338	0.03658	0.01411		0.0514	0.0559	0.0539	0.0365	0.0353	0.0394	0.0361	0.0204		0.00374	0.00351	0.0005	0.00805	-0.00567	0.00398	0.00048	-0.00629		1.39876e-05	1.23201e-05	2.5e-07	6.48025e-05	3.21489e-05	1.58404e-05	2.304e-07	3.95641e-05
37.4	0.05389	0.05621	0.0565	0.05015	0.03318	0.04563	0.03578	0.01136		0.0506	0.056	0.0536	0.0362	0.0349	0.0395	0.0359	0.0205		0.00329	0.00021	0.0029	0.01395	-0.00172	0.00613	-0.00012	-0.00914		1.08241e-05	4.41e-08	8.41e-06	0.000194602	2.9584e-06	3.75769e-05	1.44e-08	8.35396e-05
37.6	0.05264	0.05581	0.0569	0.0482	0.03053	0.04438	0.03398	0.00881		0.0503	0.0556	0.0535	0.0363	0.0345	0.0395	0.0357	0.0197		0.00234	0.00021	0.0034	0.0119	-0.00397	0.00488	-0.00172	-0.01089		5.4756e-06	4.41e-08	1.156e-05	0.00014161	1.57609e-05	2.38144e-05	2.9584e-06	0.000118592
37.8	0.05324	0.05841	0.0552	0.04585	0.03163	0.03973	0.03353	0.01061		0.0501	0.0551	0.0532	0.0362	0.0341	0.0396	0.0355	0.0193		0.00314	0.00331	0.002	0.00965	-0.00247	0.00013	-0.00197	-0.00869		9.8596e-06	1.09561e-05	4e-06	9.31225e-05	6.1009e-06	1.69e-08	3.8809e-06	7.55161e-05
38	0.05459	0.06056	0.0551	0.03885	0.03138	0.03943	0.03273	0.01031		0.0498	0.0552	0.0529	0.036	0.0337	0.0395	0.0353	0.0195		0.00479	0.00536	0.0022	0.00285	-0.00232	-7e-05	-0.00257	-0.00919		2.29441e-05	2.87296e-05	4.84e-06	8.1225e-06	5.3824e-06	4.9e-09	6.6049e-06	8.44561e-05
38.2	0.05464	0.05766	0.0474	0.04325	0.03253	0.03873	0.03083	0.01721		0.0495	0.0554	0.0526	0.036	0.0334	0.0394	0.0349	0.0199		0.00514	0.00226	-0.0052	0.00725	-0.00087	-0.00067	-0.00407	-0.00269		2.64196e-05	5.1076e-06	2.704e-05	5.25625e-05	7.569e-07	4.489e-07	1.65649e-05	7.2361e-06
38.4	0.05509	0.05761	0.04795	0.04425	0.03283	0.04013	0.02953	0.01671		0.0498	0.0551	0.0525	0.0361	0.0333	0.0392	0.0347	0.0203		0.00529	0.00251	-0.00455	0.00815	-0.00047	0.00093	-0.00517	-0.00359		2.79841e-05	6.3001e-06	2.07025e-05	6.64225e-05	2.209e-07	8.649e-07	2.67289e-05	1.28881e-05
38.6	0.05259	0.05896	0.05305	0.03845	0.03343	0.04008	0.03128	0.01406		0.0495	0.0548	0.0524	0.0359	0.0331	0.0388	0.0344	0.0196		0.00309	0.00416	0.00065	0.00255	0.00033	0.00128	-0.00312	-0.00554		9.5481e-06	1.73056e-05	4.225e-07	6.5025e-06	1.089e-07	1.6384e-06	9.7344e-06	3.06916e-05
38.8	0.05104	0.05536	0.05635	0.04335	0.02248	0.04188	0.03273	0.01081		0.0493	0.0546	0.0523	0.0357	0.0329	0.0386	0.0342	0.019		0.00174	0.00076	0.00405	0.00765	-0.01042	0.00328	-0.00147	-0.00819		3.0276e-06	5.776e-07	1.64025e-05	5.85225e-05	0.000108576	1.07584e-05	2.1609e-06	6.70761e-05
39	0.05384	0.05586	0.05965	0.0471	0.02468	0.03828	0.03483	0.01076		0.0492	0.0545	0.0521	0.0356	0.0328	0.0384	0.0342	0.019		0.00464	0.00136	0.00755	0.0115	-0.00812	-0.00012	0.00063	-0.00824		2.15296e-05	1.8496e-06	5.70025e-05	0.00013225	6.59344e-05	1.44e-08	3.969e-07	6.78976e-05
39.2	0.05314	0.05601	0.0566	0.055	0.02548	0.03953	0.03338	0.01131		0.049	0.0542	0.0519	0.0355	0.0328	0.0383	0.0343	0.0192		0.00414	0.00181	0.0047	0.0195	-0.00732	0.00123	-0.00092	-0.00789		1.71396e-05	3.2761e-06	2.209e-05	0.00038025	5.35824e-05	1.5129e-06	8.464e-07	6.22521e-05
39.4	0.05264	0.05376	0.05305	0.04695	0.02458	0.04083	0.02838	0.01211		0.0488	0.0539	0.0517	0.0353	0.033	0.0382	0.0343	0.0194		0.00384	-0.00014	0.00135	0.01165	-0.00842	0.00263	-0.00592	-0.00729		1.47456e-05	1.96e-08	1.8225e-06	0.000135723	7.08964e-05	6.9169e-06	3.50464e-05	5.31441e-05
39.6	0.04919	0.05741	0.0511	0.0414	0.02783	0.04243	0.02928	0.01211		0.0488	0.0536	0.0513	0.0348	0.0332	0.0381	0.0343	0.0196		0.00039	0.00381	-0.0002	0.0066	-0.00537	0.00433	-0.00502	-0.00749		1.521e-07	1.45161e-05	4e-08	4.356e-05	2.88369e-05	1.87489e-05	2.52004e-05	5.61001e-05
39.8	0.05139	0.05711	0.04925	0.0439	0.02928	0.03863	0.03238	0.00931		0.0488	0.0535	0.0511	0.0348	0.0334	0.0379	0.0343	0.0192		0.00259	0.00361	-0.00185	0.0091	-0.00412	0.00073	-0.00192	-0.00989		6.7081e-06	1.30321e-05	3.4225e-06	8.281e-05	1.69744e-05	5.329e-07	3.6864e-06	9.78121e-05
40	0.05084	0.05451	0.05135	0.0416	0.03228	0.04173	0.03143	0.00981		0.0484	0.0533	0.051	0.0347	0.0334	0.0378	0.0342	0.0188		0.00244	0.00121	0.00035	0.0069	-0.00112	0.00393	-0.00277	-0.00899		5.9536e-06	1.4641e-06	1.225e-07	4.761e-05	1.2544e-06	1.54449e-05	7.6729e-06	8.08201e-05
40.2	0.04924	0.05616	0.05395	0.0419	0.03098	0.03753	0.03103	0.01376		0.0486	0.0533	0.051	0.0346	0.0333	0.0376	0.0343	0.0188		0.00064	0.00286	0.00295	0.0073	-0.00232	-7e-05	-0.00327	-0.00504		4.096e-07	8.1796e-06	8.7025e-06	5.329e-05	5.3824e-06	4.9e-09	1.06929e-05	2.54016e-05
40.4	0.05214	0.05481	0.05675	0.044	0.03183	0.03878	0.03193	0.01396		0.0486	0.0528	0.051	0.0346	0.0332	0.0375	0.0345	0.0192		0.00354	0.00201	0.00575	0.0094	-0.00137	0.00128	-0.00257	-0.00524		1.25316e-05	4.0401e-06	3.30625e-05	8.836e-05	1.8769e-06	1.6384e-06	6.6049e-06	2.74576e-05
40.6	0.04819	0.05431	0.0562	0.04355	0.03003	0.03918	0.03228	0.01481		0.0483	0.0526	0.051	0.0345	0.033	0.0372	0.0346	0.0193		-0.00011	0.00171	0.0052	0.00905	-0.00297	0.00198	-0.00232	-0.00449		1.21e-08	2.9241e-06	2.704e-05	8.19025e-05	8.8209e-06	3.9204e-06	5.3824e-06	2.01601e-05
40.8	0.04769	0.05531	0.0521	0.04265	0.02873	0.03783	0.02978	0.01001		0.048	0.052	0.0507	0.0345	0.0327	0.0371	0.0346	0.0193		-0.00031	0.00331	0.0014	0.00815	-0.00397	0.00073	-0.00482	-0.00929		9.61e-08	1.09561e-05	1.96e-06	6.64225e-05	1.57609e-05	5.329e-07	2.32324e-05	8.63041e-05
41	0.04974	0.05426	0.05115	0.0411	0.02733	0.03723	0.02953	0.00726		0.0477	0.0517	0.0506	0.0344	0.0325	0.0371	0.0345	0.0189		0.00204	0.00256	0.00055	0.0067	-0.00517	0.00013	-0.00497	-0.01164		4.1616e-06	6.5536e-06	3.025e-07	4.489e-05	2.67289e-05	1.69e-08	2.47009e-05	0.00013549
41.2	0.04819	0.05396	0.049	0.0409	0.03198	0.03843	0.03073	0.00751		0.0473	0.0518	0.0503	0.0342	0.0323	0.037	0.034	0.0187		0.00089	0.00216	-0.0013	0.0067	-0.00032	0.00143	-0.00327	-0.01119		7.921e-07	4.6656e-06	1.69e-06	4.489e-05	1.024e-07	2.0449e-06	1.06929e-05	0.000125216
41.4	0.05029	0.05276	0.04935	0.0388	0.02698	0.03703	0.03208	0.01116		0.0468	0.0516	0.0504	0.034	0.0321	0.037	0.0338	0.0188		0.00349	0.00116	-0.00105	0.0048	-0.00512	3e-05	-0.00172	-0.00764		1.21801e-05	1.3456e-06	1.1025e-06	2.304e-05	2.62144e-05	9e-10	2.9584e-06	5.83696e-05
41.6	0.04959	0.05296	0.05065	0.0386	0.02923	0.03738	0.02848	0.01136		0.0467	0.0513	0.0502	0.0341	0.0318	0.0369	0.0336	0.0189		0.00289	0.00166	0.00045	0.0045	-0.00257	0.00048	-0.00512	-0.00754		8.3521e-06	2.7556e-06	2.025e-07	2.025e-05	6.6049e-06	2.304e-07	2.62144e-05	5.68516e-05
41.8	0.04749	0.05171	0.05215	0.03705	0.02728	0.03913	0.02818	0.00976		0.0465	0.0507	0.0501	0.0336	0.0316	0.0367	0.0332	0.0193		0.00099	0.00101	0.00205	0.00345	-0.00432	0.00243	-0.00502	-0.00954		9.801e-07	1.0201e-06	4.2025e-06	1.19025e-05	1.86624e-05	5.9049e-06	2.52004e-05	9.10116e-05
42	0.04894	0.05311	0.05355	0.041	0.02618	0.03608	0.02908	0.00941		0.0461	0.0502	0.0498	0.0335	0.0316	0.0366	0.0328	0.0193		0.00284	0.00291	0.00375	0.0075	-0.00542	-0.00052	-0.00372	-0.00989		8.0656e-06	8.4681e-06	1.40625e-05	5.625e-05	2.93764e-05	2.704e-07	1.38384e-05	9.78121e-05
42.2	0.04619	0.05396	0.05175	0.04185	0.03158	0.03663	0.03038	0.00876		0.0458	0.0496	0.0495	0.0332	0.0315	0.0364	0.0325	0.0188		0.00039	0.00436	0.00225	0.00865	8e-05	0.00023	-0.00212	-0.01004		1.521e-07	1.90096e-05	5.0625e-06	7.48225e-05	6.4e-09	5.29e-08	4.4944e-06	0.000100802
42.4	0.04959	0.05606	0.0507	0.04045	0.02878	0.03888	0.03053	0.00996		0.0456	0.049	0.0491	0.0329	0.0314	0.0361	0.0323	0.0185		0.00399	0.00706	0.0016	0.00755	-0.00262	0.00278	-0.00177	-0.00854		1.59201e-05	4.98436e-05	2.56e-06	5.70025e-05	6.8644e-06	7.7284e-06	3.1329e-06	7.29316e-05
42.6	0.04819	0.05531	0.05005	0.0381	0.02698	0.03883	0.03068	0.00851		0.0451	0.0485	0.0486	0.0325	0.0311	0.0358	0.0321	0.0185		0.00309	0.00681	0.00145	0.0056	-0.00412	0.00303	-0.00142	-0.00999		9.5481e-06	4.63761e-05	2.1025e-06	3.136e-05	1.69744e-05	9.1809e-06	2.0164e-06	9.98001e-05
42.8	0.04599	0.05246	0.0485	0.03855	0.02783	0.03848	0.03108	0.00956		0.0445	0.0481	0.0483	0.0321	0.0308	0.0355	0.0321	0.0187		0.00149	0.00436	0.0002	0.00645	-0.00297	0.00298	-0.00102	-0.00914		2.2201e-06	1.90096e-05	4e-08	4.16025e-05	8.8209e-06	8.8804e-06	1.0404e-06	8.35396e-05
43	0.04864	0.05051	0.0484	0.0369	0.02498	0.03823	0.02843	0.00856		0.0442	0.0479	0.048	0.0319	0.0304	0.0353	0.0321	0.0188		0.00444	0.00261	0.0004	0.005	-0.00542	0.00293	-0.00367	-0.01024		1.97136e-05	6.8121e-06	1.6e-07	2.5e-05	2.93764e-05	8.5849e-06	1.34689e-05	0.000104858
43.2	0.04649	0.05156	0.05035	0.03665	0.02758	0.03773	0.02968	0.00916		0.0438	0.0479	0.0477	0.0316	0.0299	0.0351	0.0319	0.0185		0.00269	0.00366	0.00265	0.00505	-0.00232	0.00263	-0.00222	-0.00934		7.2361e-06	1.33956e-05	7.0225e-06	2.55025e-05	5.3824e-06	6.9169e-06	4.9284e-06	8.72356e-05
43.4	0.04749	0.05216	0.05365	0.036	0.02453	0.03543	0.02988	0.01016		0.0435	0.0476	0.0476	0.0314	0.0296	0.0351	0.0316	0.0183		0.00399	0.00456	0.00605	0.0046	-0.00507	0.00033	-0.00172	-0.00814		1.59201e-05	2.07936e-05	3.66025e-05	2.116e-05	2.57049e-05	1.089e-07	2.9584e-06	6.62596e-05
43.6	0.04729	0.05231	0.0527	0.03435	0.02638	0.03433	0.02868	0.01291		0.0434	0.0474	0.0473	0.0313	0.0295	0.035	0.0313	0.018		0.00389	0.00491	0.0054	0.00305	-0.00312	-0.00067	-0.00262	-0.00509		1.51321e-05	2.41081e-05	2.916e-05	9.3025e-06	9.7344e-06	4.489e-07	6.8644e-06	2.59081e-05
43.8	0.04729	0.05266	0.0528	0.03725	0.02298	0.03433	0.02828	0.01031		0.0433	0.047	0.0471	0.031	0.0295	0.0348	0.0311	0.0183		0.00399	0.00566	0.0057	0.00625	-0.00652	-0.00047	-0.00282	-0.00799		1.59201e-05	3.20356e-05	3.249e-05	3.90625e-05	4.25104e-05	2.209e-07	7.9524e-06	6.38401e-05
44	0.04649	0.05086	0.0493	0.03915	0.02158	0.03593	0.02783	0.00956		0.043	0.0468	0.0469	0.031	0.0295	0.0346	0.031	0.0184		0.00349	0.00406	0.0024	0.00815	-0.00792	0.00133	-0.00317	-0.00884		1.21801e-05	1.64836e-05	5.76e-06	6.64225e-05	6.27264e-05	1.7689e-06	1.00489e-05	7.81456e-05
44.2	0.04674	0.05146	0.04805	0.03755	0.02343	0.03593	0.02998	0.00706		0.0428	0.0467	0.0467	0.031	0.0295	0.0343	0.0309	0.0185		0.00394	0.00476	0.00135	0.00655	-0.00607	0.00163	-0.00092	-0.01144		1.55236e-05	2.26576e-05	1.8225e-06	4.29025e-05	3.68449e-05	2.6569e-06	8.464e-07	0.000130874
44.4	0.04719	0.05261	0.04565	0.03615	0.02563	0.03548	0.03133	0.00961		0.0427	0.0466	0.0467	0.0309	0.0294	0.034	0.0308	0.0182		0.00449	0.00601	-0.00105	0.00525	-0.00377	0.00148	0.00053	-0.00859		2.01601e-05	3.61201e-05	1.1025e-06	2.75625e-05	1.42129e-05	2.1904e-06	2.809e-07	7.37881e-05
44.6	0.04729	0.05216	0.04615	0.0371	0.02828	0.03678	0.02868	0.00986		0.0424	0.0464	0.0465	0.0307	0.0291	0.0338	0.0307	0.018		0.00489	0.00576	-0.00035	0.0064	-0.00082	0.00298	-0.00202	-0.00814		2.39121e-05	3.31776e-05	1.225e-07	4.096e-05	6.724e-07	8.8804e-06	4.0804e-06	6.62596e-05
44.8	0.04609	0.04986	0.04985	0.0359	0.02888	0.03453	0.02768	0.01051		0.042	0.0463	0.0464	0.0307	0.0288	0.0336	0.0306	0.0181		0.00409	0.00356	0.00345	0.0052	8e-05	0.00093	-0.00292	-0.00759		1.67281e-05	1.26736e-05	1.19025e-05	2.704e-05	6.4e-09	8.649e-07	8.5264e-06	5.76081e-05
45	0.04699	0.04971	0.05325	0.0371	0.02798	0.03543	0.02808	0.01136		0.0419	0.0461	0.0462	0.0307	0.0284	0.0335	0.0305	0.0177		0.00509	0.00361	0.00705	0.0064	-0.00042	0.00193	-0.00242	-0.00634		2.59081e-05	1.30321e-05	4.97025e-05	4.096e-05	1.764e-07	3.7249e-06	5.8564e-06	4.01956e-05
45.2	0.04599	0.05076	0.0523	0.0377	0.02728	0.03353	0.02513	0.00841		0.042	0.0461	0.0461	0.0306	0.0281	0.0336	0.0303	0.0177		0.00399	0.00466	0.0062	0.0071	-0.00082	-7e-05	-0.00517	-0.00929		1.59201e-05	2.17156e-05	3.844e-05	5.041e-05	6.724e-07	4.9e-09	2.67289e-05	8.63041e-05
45.4	0.04659	0.05291	0.0505	0.0341	0.02363	0.03453	0.02718	0.00736		0.0418	0.0459	0.046	0.0305	0.0279	0.0336	0.0302	0.0179		0.00479	0.00701	0.0045	0.0036	-0.00427	0.00093	-0.00302	-0.01054		2.29441e-05	4.91401e-05	2.025e-05	1.296e-05	1.82329e-05	8.649e-07	9.1204e-06	0.000111092
45.6	0.04589	0.05141	0.0507	0.03605	0.02418	0.03353	0.02683	0.00771		0.0418	0.0457	0.0461	0.0304	0.0278	0.0335	0.0299	0.0179		0.00409	0.00571	0.0046	0.00565	-0.00362	3e-05	-0.00307	-0.01019		1.67281e-05	3.26041e-05	2.116e-05	3.19225e-05	1.31044e-05	9e-10	9.4249e-06	0.000103836
45.8	0.04404	0.05271	0.0466	0.0353	0.02283	0.03348	0.02963	0.00861		0.0419	0.0454	0.0459	0.0303	0.0278	0.0333	0.0296	0.0178		0.00214	0.00731	0.0007	0.005	-0.00497	0.00018	3e-05	-0.00919		4.5796e-06	5.34361e-05	4.9e-07	2.5e-05	2.47009e-05	3.24e-08	9e-10	8.44561e-05
46	0.04539	0.05376	0.04435	0.03335	0.02278	0.03633	0.02643	0.01136		0.0418	0.0454	0.0458	0.0302	0.0279	0.0331	0.0293	0.0178		0.00359	0.00836	-0.00145	0.00315	-0.00512	0.00323	-0.00287	-0.00644		1.28881e-05	6.98896e-05	2.1025e-06	9.9225e-06	2.62144e-05	1.04329e-05	8.2369e-06	4.14736e-05
46.2	0.04674	0.05201	0.04465	0.0328	0.02378	0.03248	0.02758	0.00981		0.0417	0.0455	0.0457	0.03	0.028	0.0328	0.0292	0.0178		0.00504	0.00651	-0.00105	0.0028	-0.00422	-0.00032	-0.00162	-0.00799		2.54016e-05	4.23801e-05	1.1025e-06	7.84e-06	1.78084e-05	1.024e-07	2.6244e-06	6.38401e-05
46.4	0.04624	0.05291	0.04875	0.0358	0.02723	0.03363	0.03103	0.00736		0.0418	0.0457	0.0457	0.03	0.028	0.0325	0.0293	0.0179		0.00444	0.00721	0.00305	0.0058	-0.00077	0.00113	0.00173	-0.01054		1.97136e-05	5.19841e-05	9.3025e-06	3.364e-05	5.929e-07	1.2769e-06	2.9929e-06	0.000111092
46.6	0.04724	0.05141	0.0517	0.0466	0.02863	0.03508	0.02793	0.01066		0.0419	0.0459	0.0456	0.0299	0.0278	0.0324	0.0294	0.0177		0.00534	0.00551	0.0061	0.0167	0.00083	0.00268	-0.00147	-0.00704		2.85156e-05	3.03601e-05	3.721e-05	0.00027889	6.889e-07	7.1824e-06	2.1609e-06	4.95616e-05
46.8	0.04604	0.05051	0.0501	0.04465	0.02538	0.03683	0.02843	0.01001		0.042	0.046	0.0458	0.03	0.0277	0.0323	0.0294	0.0177		0.00404	0.00451	0.0043	0.01465	-0.00232	0.00453	-0.00097	-0.00769		1.63216e-05	2.03401e-05	1.849e-05	0.000214623	5.3824e-06	2.05209e-05	9.409e-07	5.91361e-05
47	0.04504	0.05151	0.04935	0.0386	0.02493	0.03528	0.02653	0.00871		0.042	0.0457	0.0459	0.03	0.0274	0.0323	0.0293	0.0176		0.00304	0.00581	0.00345	0.0086	-0.00247	0.00298	-0.00277	-0.00889		9.2416e-06	3.37561e-05	1.19025e-05	7.396e-05	6.1009e-06	8.8804e-06	7.6729e-06	7.90321e-05
47.2	0.04474	0.05021	0.0471	0.03695	0.02658	0.03478	0.02498	0.00856		0.0422	0.0453	0.046	0.0301	0.0272	0.0325	0.0291	0.0175		0.00254	0.00491	0.0011	0.00685	-0.00062	0.00228	-0.00412	-0.00894		6.4516e-06	2.41081e-05	1.21e-06	4.69225e-05	3.844e-07	5.1984e-06	1.69744e-05	7.99236e-05
47.4	0.04339	0.05036	0.0447	0.03415	0.02898	0.03458	0.02648	0.00771		0.042	0.0448	0.0459	0.0301	0.0272	0.0327	0.0289	0.0173		0.00139	0.00556	-0.0012	0.00405	0.00178	0.00188	-0.00242	-0.00959		1.9321e-06	3.09136e-05	1.44e-06	1.64025e-05	3.1684e-06	3.5344e-06	5.8564e-06	9.19681e-05
47.6	0.04449	0.04966	0.04425	0.03365	0.03108	0.03538	0.02823	0.00836		0.0415	0.0444	0.0458	0.0299	0.0272	0.0327	0.0288	0.0175		0.00299	0.00526	-0.00155	0.00375	0.00388	0.00268	-0.00057	-0.00914		8.9401e-06	2.76676e-05	2.4025e-06	1.40625e-05	1.50544e-05	7.1824e-06	3.249e-07	8.35396e-05
47.8	0.04344	0.05141	0.04425	0.03575	0.03043	0.03278	0.02813	0.00731		0.0411	0.044	0.0455	0.0298	0.0272	0.0327	0.0287	0.0175		0.00234	0.00741	-0.00125	0.00595	0.00323	8e-05	-0.00057	-0.01019		5.4756e-06	5.49081e-05	1.5625e-06	3.54025e-05	1.04329e-05	6.4e-09	3.249e-07	0.000103836
48	0.04314	0.05241	0.04545	0.038	0.02963	0.03303	0.02708	0.00756		0.0407	0.0437	0.0453	0.0297	0.0273	0.0324	0.0286	0.0178		0.00244	0.00871	0.00015	0.0083	0.00233	0.00063	-0.00152	-0.01024		5.9536e-06	7.58641e-05	2.25e-08	6.889e-05	5.4289e-06	3.969e-07	2.3104e-06	0.000104858
48.2	0.04269	0.04981	0.0487	0.0374	0.02923	0.03248	0.02798	0.00896		0.0402	0.0434	0.0449	0.0294	0.0272	0.032	0.0285	0.0177		0.00249	0.00641	0.0038	0.008	0.00203	0.00048	-0.00052	-0.00874		6.2001e-06	4.10881e-05	1.444e-05	6.4e-05	4.1209e-06	2.304e-07	2.704e-07	7.63876e-05
48.4	0.04459	0.05231	0.04615	0.0396	0.02468	0.03468	0.02628	0.00896		0.04	0.0435	0.0447	0.0292	0.027	0.0316	0.0283	0.0179		0.00459	0.00881	0.00145	0.0104	-0.00232	0.00308	-0.00202	-0.00894		2.10681e-05	7.76161e-05	2.1025e-06	0.00010816	5.3824e-06	9.4864e-06	4.0804e-06	7.99236e-05
48.6	0.04489	0.05211	0.04795	0.0353	0.02278	0.03363	0.02608	0.01151		0.0401	0.0436	0.0445	0.0292	0.0267	0.0314	0.0281	0.0175		0.00479	0.00851	0.00345	0.0061	-0.00392	0.00223	-0.00202	-0.00599		2.29441e-05	7.24201e-05	1.19025e-05	3.721e-05	1.53664e-05	4.9729e-06	4.0804e-06	3.58801e-05
48.8	0.04354	0.04961	0.0485	0.03385	0.02673	0.03263	0.02638	0.00766		0.04	0.044	0.0443	0.0292	0.0263	0.0312	0.0279	0.0173		0.00354	0.00561	0.0042	0.00465	0.00043	0.00143	-0.00152	-0.00964		1.25316e-05	3.14721e-05	1.764e-05	2.16225e-05	1.849e-07	2.0449e-06	2.3104e-06	9.29296e-05
49	0.04274	0.05016	0.04595	0.03295	0.02728	0.03193	0.02558	0.00691		0.0402	0.0438	0.0443	0.0292	0.026	0.0313	0.0277	0.0172		0.00254	0.00636	0.00165	0.00375	0.00128	0.00063	-0.00212	-0.01029		6.4516e-06	4.04496e-05	2.7225e-06	1.40625e-05	1.6384e-06	3.969e-07	4.4944e-06	0.000105884
49.2	0.04394	0.05191	0.0443	0.03685	0.03073	0.03128	0.02598	0.00726		0.0403	0.0437	0.0444	0.0292	0.0257	0.0314	0.0276	0.0172		0.00364	0.00821	-0.0001	0.00765	0.00503	-0.00012	-0.00162	-0.00994		1.32496e-05	6.74041e-05	1e-08	5.85225e-05	2.53009e-05	1.44e-08	2.6244e-06	9.88036e-05
49.4	0.04344	0.05251	0.0434	0.0367	0.02888	0.03313	0.02588	0.01131		0.0402	0.0432	0.0445	0.0293	0.0255	0.0314	0.0274	0.0171		0.00324	0.00931	-0.0011	0.0074	0.00338	0.00173	-0.00152	-0.00579		1.04976e-05	8.66761e-05	1.21e-06	5.476e-05	1.14244e-05	2.9929e-06	2.3104e-06	3.35241e-05
49.6	0.04304	0.05251	0.0433	0.0361	0.02738	0.03453	0.02753	0.01041		0.0399	0.0432	0.0445	0.0292	0.0254	0.0314	0.0271	0.0173		0.00314	0.00931	-0.0012	0.0069	0.00198	0.00313	0.00043	-0.00689		9.8596e-06	8.66761e-05	1.44e-06	4.761e-05	3.9204e-06	9.7969e-06	1.849e-07	4.74721e-05
49.8	0.04249	0.05171	0.04445	0.03975	0.02538	0.03398	0.02883	0.00971		0.0394	0.043	0.0443	0.029	0.0254	0.0313	0.0269	0.0172		0.00309	0.00871	0.00015	0.01075	-2e-05	0.00268	0.00193	-0.00749		9.5481e-06	7.58641e-05	2.25e-08	0.000115562	4e-10	7.1824e-06	3.7249e-06	5.61001e-05
50	0.04239	0.05001	0.045	0.0376	0.02483	0.03468	0.02748	0.00906		0.039	0.043	0.0442	0.029	0.0254	0.0312	0.0269	0.017		0.00339	0.00701	0.0008	0.0086	-0.00057	0.00348	0.00058	-0.00794		1.14921e-05	4.91401e-05	6.4e-07	7.396e-05	3.249e-07	1.21104e-05	3.364e-07	6.30436e-05
50.2	0.04259	0.05041	0.04595	0.0335	0.02613	0.03388	0.02698	0.00796		0.0388	0.0429	0.0441	0.029	0.0252	0.0312	0.027	0.017		0.00379	0.00751	0.00185	0.0045	0.00093	0.00268	-2e-05	-0.00904		1.43641e-05	5.64001e-05	3.4225e-06	2.025e-05	8.649e-07	7.1824e-06	4e-10	8.17216e-05
50.4	0.04254	0.04936	0.04655	0.0344	0.02563	0.03033	0.02438	0.00691		0.0385	0.0431	0.0438	0.0289	0.0252	0.0311	0.0271	0.017		0.00404	0.00626	0.00275	0.0055	0.00043	-0.00077	-0.00272	-0.01009		1.63216e-05	3.91876e-05	7.5625e-06	3.025e-05	1.849e-07	5.929e-07	7.3984e-06	0.000101808
50.6	0.04204	0.04721	0.0469	0.03245	0.02723	0.03223	0.02578	0.00696		0.0385	0.043	0.0437	0.0289	0.0251	0.031	0.0272	0.017		0.00354	0.00421	0.0032	0.00355	0.00213	0.00123	-0.00142	-0.01004		1.25316e-05	1.77241e-05	1.024e-05	1.26025e-05	4.5369e-06	1.5129e-06	2.0164e-06	0.000100802
50.8	0.04019	0.04906	0.0447	0.03315	0.02708	0.03233	0.02558	0.01161		0.0386	0.0431	0.0435	0.0289	0.0251	0.0308	0.0271	0.0172		0.00159	0.00596	0.0012	0.00425	0.00198	0.00153	-0.00152	-0.00559		2.5281e-06	3.55216e-05	1.44e-06	1.80625e-05	3.9204e-06	2.3409e-06	2.3104e-06	3.12481e-05
51	0.04139	0.05221	0.0451	0.03345	0.02838	0.03128	0.02553	0.00841		0.0389	0.0429	0.0436	0.029	0.0252	0.0307	0.0269	0.0169		0.00249	0.00931	0.0015	0.00445	0.00318	0.00058	-0.00137	-0.00849		6.2001e-06	8.66761e-05	2.25e-06	1.98025e-05	1.01124e-05	3.364e-07	1.8769e-06	7.20801e-05
51.2	0.04239	0.05371	0.04835	0.03225	0.02573	0.03063	0.02433	0.00726		0.0392	0.0424	0.0436	0.029	0.0254	0.0305	0.0267	0.0169		0.00319	0.01131	0.00475	0.00325	0.00033	0.00013	-0.00237	-0.00964		1.01761e-05	0.000127916	2.25625e-05	1.05625e-05	1.089e-07	1.69e-08	5.6169e-06	9.29296e-05
51.4	0.04139	0.05551	0.04905	0.03665	0.02133	0.03273	0.02803	0.00786		0.0393	0.042	0.0435	0.0289	0.0255	0.0303	0.0267	0.0169		0.00209	0.01351	0.00555	0.00775	-0.00417	0.00243	0.00133	-0.00904		4.3681e-06	0.00018252	3.08025e-05	6.00625e-05	1.73889e-05	5.9049e-06	1.7689e-06	8.17216e-05
51.6	0.04179	0.05151	0.04905	0.03475	0.02613	0.03153	0.02648	0.00711		0.0391	0.0418	0.0433	0.0287	0.0255	0.0302	0.0266	0.0167		0.00269	0.00971	0.00575	0.00605	0.00063	0.00133	-0.00012	-0.00959		7.2361e-06	9.42841e-05	3.30625e-05	3.66025e-05	3.969e-07	1.7689e-06	1.44e-08	9.19681e-05
51.8	0.04184	0.05046	0.04605	0.03135	0.02563	0.03168	0.02643	0.01131		0.0389	0.0417	0.0431	0.0285	0.0254	0.03	0.0267	0.017		0.00294	0.00876	0.00295	0.00285	0.00023	0.00168	-0.00027	-0.00569		8.6436e-06	7.67376e-05	8.7025e-06	8.1225e-06	5.29e-08	2.8224e-06	7.29e-08	3.23761e-05
52	0.04174	0.04981	0.0467	0.0337	0.02628	0.03248	0.02408	0.01006		0.0386	0.0417	0.0429	0.0285	0.0252	0.03	0.0267	0.0169		0.00314	0.00811	0.0038	0.0052	0.00108	0.00248	-0.00262	-0.00684		9.8596e-06	6.57721e-05	1.444e-05	2.704e-05	1.1664e-06	6.1504e-06	6.8644e-06	4.67856e-05
52.2	0.04159	0.05051	0.0458	0.03215	0.02628	0.03213	0.02638	0.00931		0.0384	0.042	0.043	0.0284	0.0249	0.03	0.0267	0.0167		0.00319	0.00851	0.0028	0.00375	0.00138	0.00213	-0.00032	-0.00739		1.01761e-05	7.24201e-05	7.84e-06	1.40625e-05	1.9044e-06	4.5369e-06	1.024e-07	5.46121e-05
52.4	0.04234	0.04901	0.0442	0.03025	0.02803	0.03283	0.02643	0.00961		0.0382	0.0421	0.043	0.0285	0.0245	0.0301	0.0265	0.0168		0.00414	0.00691	0.0012	0.00175	0.00353	0.00273	-7e-05	-0.00719		1.71396e-05	4.77481e-05	1.44e-06	3.0625e-06	1.24609e-05	7.4529e-06	4.9e-09	5.16961e-05
52.6	0.04139	0.04846	0.0439	0.0321	0.02723	0.03203	0.02578	0.00716		0.0382	0.0423	0.043	0.0285	0.0243	0.0303	0.0265	0.0164		0.00319	0.00616	0.0009	0.0036	0.00293	0.00173	-0.00072	-0.00924		1.01761e-05	3.79456e-05	8.1e-07	1.296e-05	8.5849e-06	2.9929e-06	5.184e-07	8.53776e-05
52.8	0.04189	0.04981	0.0443	0.0347	0.02803	0.03218	0.02773	0.00786		0.0383	0.0425	0.043	0.0289	0.0242	0.0305	0.0264	0.0163		0.00359	0.00731	0.0013	0.0058	0.00383	0.00168	0.00133	-0.00844		1.28881e-05	5.34361e-05	1.69e-06	3.364e-05	1.46689e-05	2.8224e-06	1.7689e-06	7.12336e-05
53	0.04054	0.04801	0.04655	0.0356	0.02718	0.03193	0.02558	0.01456		0.0386	0.0426	0.0431	0.0289	0.0243	0.0305	0.0263	0.0167		0.00194	0.00541	0.00345	0.0067	0.00288	0.00143	-0.00072	-0.00214		3.7636e-06	2.92681e-05	1.19025e-05	4.489e-05	8.2944e-06	2.0449e-06	5.184e-07	4.5796e-06
53.2	0.04124	0.04881	0.04805	0.0364	0.02553	0.03183	0.02553	0.01186		0.0391	0.0423	0.0433	0.0289	0.0246	0.0302	0.0261	0.0167		0.00214	0.00651	0.00475	0.0075	0.00093	0.00163	-0.00057	-0.00484		4.5796e-06	4.23801e-05	2.25625e-05	5.625e-05	8.649e-07	2.6569e-06	3.249e-07	2.34256e-05
53.4	0.04109	0.05056	0.046	0.0338	0.02408	0.03078	0.02488	0.01056		0.0391	0.042	0.0433	0.0289	0.025	0.0298	0.026	0.0171		0.00199	0.00856	0.0027	0.0049	-0.00092	0.00098	-0.00112	-0.00654		3.9601e-06	7.32736e-05	7.29e-06	2.401e-05	8.464e-07	9.604e-07	1.2544e-06	4.27716e-05
53.6	0.03969	0.04791	0.0456	0.0334	0.02448	0.02938	0.02538	0.00836		0.0389	0.0418	0.0433	0.0288	0.0252	0.0294	0.026	0.0169		0.00079	0.00611	0.0023	0.0046	-0.00072	-2e-05	-0.00062	-0.00854		6.241e-07	3.73321e-05	5.29e-06	2.116e-05	5.184e-07	4e-10	3.844e-07	7.29316e-05
53.8	0.04064	0.04806	0.0439	0.0344	0.02483	0.02958	0.02413	0.00651		0.0388	0.0418	0.0432	0.0287	0.0252	0.0291	0.0259	0.0166		0.00184	0.00626	0.0007	0.0057	-0.00037	0.00048	-0.00177	-0.01009		3.3856e-06	3.91876e-05	4.9e-07	3.249e-05	1.369e-07	2.304e-07	3.1329e-06	0.000101808
54	0.04084	0.04751	0.04185	0.03395	0.02583	0.02893	0.02758	0.00726		0.0385	0.042	0.0431	0.0287	0.025	0.029	0.0259	0.0164		0.00234	0.00551	-0.00125	0.00525	0.00083	-7e-05	0.00168	-0.00914		5.4756e-06	3.03601e-05	1.5625e-06	2.75625e-05	6.889e-07	4.9e-09	2.8224e-06	8.35396e-05
54.2	0.04159	0.04726	0.0421	0.034	0.02768	0.03103	0.02573	0.00611		0.0385	0.0422	0.0432	0.0288	0.0247	0.0291	0.026	0.0163		0.00309	0.00506	-0.0011	0.0052	0.00298	0.00193	-0.00027	-0.01019		9.5481e-06	2.56036e-05	1.21e-06	2.704e-05	8.8804e-06	3.7249e-06	7.29e-08	0.000103836
54.4	0.04069	0.04511	0.04545	0.03155	0.02603	0.03038	0.02628	0.01371		0.0384	0.0424	0.0431	0.0288	0.0242	0.0293	0.0261	0.0162		0.00229	0.00271	0.00235	0.00275	0.00183	0.00108	0.00018	-0.00249		5.2441e-06	7.3441e-06	5.5225e-06	7.5625e-06	3.3489e-06	1.1664e-06	3.24e-08	6.2001e-06
54.6	0.04009	0.04501	0.045	0.0318	0.02658	0.02943	0.02558	0.01146		0.0382	0.0423	0.0431	0.029	0.0237	0.0296	0.0261	0.0163		0.00189	0.00271	0.0019	0.0028	0.00288	-0.00017	-0.00052	-0.00484		3.5721e-06	7.3441e-06	3.61e-06	7.84e-06	8.2944e-06	2.89e-08	2.704e-07	2.34256e-05
54.8	0.04179	0.04626	0.0444	0.0348	0.02683	0.03263	0.02483	0.01091		0.0383	0.0421	0.0429	0.0291	0.0235	0.0299	0.026	0.0162		0.00349	0.00416	0.0015	0.0057	0.00333	0.00273	-0.00117	-0.00529		1.21801e-05	1.73056e-05	2.25e-06	3.249e-05	1.10889e-05	7.4529e-06	1.3689e-06	2.79841e-05
55	0.04049	0.04616	0.0447	0.03425	0.02593	0.03088	0.02518	0.00861		0.0385	0.042	0.0428	0.029	0.0235	0.03	0.0257	0.0167		0.00199	0.00416	0.0019	0.00525	0.00243	0.00088	-0.00052	-0.00809		3.9601e-06	1.73056e-05	3.61e-06	2.75625e-05	5.9049e-06	7.744e-07	2.704e-07	6.54481e-05
55.2	0.04019	0.04836	0.0437	0.0363	0.02438	0.03133	0.02708	0.00791		0.0387	0.0417	0.0427	0.029	0.0238	0.0298	0.0254	0.0168		0.00149	0.00666	0.001	0.0073	0.00058	0.00153	0.00168	-0.00889		2.2201e-06	4.43556e-05	1e-06	5.329e-05	3.364e-07	2.3409e-06	2.8224e-06	7.90321e-05
55.4	0.03954	0.04836	0.04	0.03365	0.02603	0.03108	0.02533	0.00911		0.0386	0.0415	0.0426	0.0288	0.0241	0.0294	0.0252	0.0168		0.00094	0.00686	-0.0026	0.00485	0.00193	0.00168	0.00013	-0.00769		8.836e-07	4.70596e-05	6.76e-06	2.35225e-05	3.7249e-06	2.8224e-06	1.69e-08	5.91361e-05
55.6	0.04109	0.04606	0.0408	0.03345	0.02588	0.03258	0.02628	0.00806		0.0386	0.0413	0.0425	0.0288	0.0245	0.029	0.0253	0.0168		0.00249	0.00476	-0.0017	0.00465	0.00138	0.00358	0.00098	-0.00874		6.2001e-06	2.26576e-05	2.89e-06	2.16225e-05	1.9044e-06	1.28164e-05	9.604e-07	7.63876e-05
55.8	0.03924	0.04586	0.0403	0.028	0.02653	0.03048	0.02703	0.01056		0.0385	0.0413	0.0425	0.0287	0.0246	0.0286	0.0254	0.0166		0.00074	0.00456	-0.0022	-0.0007	0.00193	0.00188	0.00163	-0.00604		5.476e-07	2.07936e-05	4.84e-06	4.9e-07	3.7249e-06	3.5344e-06	2.6569e-06	3.64816e-05
56	0.04089	0.04686	0.04255	0.03015	0.02328	0.03063	0.02338	0.01326		0.0381	0.0414	0.0424	0.0287	0.0246	0.0284	0.0253	0.0165		0.00279	0.00546	0.00015	0.00145	-0.00132	0.00223	-0.00192	-0.00324		7.7841e-06	2.98116e-05	2.25e-08	2.1025e-06	1.7424e-06	4.9729e-06	3.6864e-06	1.04976e-05
56.2	0.03964	0.04566	0.0474	0.0316	0.02688	0.03163	0.02453	0.01221		0.038	0.0419	0.0425	0.0287	0.0244	0.0285	0.0252	0.0164		0.00164	0.00376	0.0049	0.0029	0.00248	0.00313	-0.00067	-0.00419		2.6896e-06	1.41376e-05	2.401e-05	8.41e-06	6.1504e-06	9.7969e-06	4.489e-07	1.75561e-05
56.4	0.04044	0.04701	0.04665	0.03495	0.02383	0.03103	0.02658	0.00876		0.0379	0.0419	0.0423	0.0289	0.024	0.0287	0.0251	0.0163		0.00254	0.00511	0.00435	0.00605	-0.00017	0.00233	0.00148	-0.00754		6.4516e-06	2.61121e-05	1.89225e-05	3.66025e-05	2.89e-08	5.4289e-06	2.1904e-06	5.68516e-05
56.6	0.03984	0.04766	0.0441	0.0367	0.02303	0.02678	0.02953	0.00726		0.0379	0.042	0.0425	0.0289	0.0235	0.0291	0.0252	0.0161		0.00194	0.00566	0.0016	0.0078	-0.00047	-0.00232	0.00433	-0.00884		3.7636e-06	3.20356e-05	2.56e-06	6.084e-05	2.209e-07	5.3824e-06	1.87489e-05	7.81456e-05
56.8	0.03959	0.04881	0.04155	0.03715	0.02368	0.03143	0.02478	0.00686		0.0378	0.0418	0.0424	0.029	0.0232	0.0295	0.0252	0.0159		0.00179	0.00701	-0.00085	0.00815	0.00048	0.00193	-0.00042	-0.00904		3.2041e-06	4.91401e-05	7.225e-07	6.64225e-05	2.304e-07	3.7249e-06	1.764e-07	8.17216e-05
57	0.03969	0.04786	0.04115	0.035	0.02653	0.03098	0.02458	0.00656		0.0379	0.0418	0.0424	0.029	0.0231	0.0298	0.0252	0.0159		0.00179	0.00606	-0.00125	0.006	0.00343	0.00118	-0.00062	-0.00934		3.2041e-06	3.67236e-05	1.5625e-06	3.6e-05	1.17649e-05	1.3924e-06	3.844e-07	8.72356e-05
57.2	0.04039	0.04791	0.0403	0.03245	0.02473	0.03228	0.02583	0.01061		0.0379	0.0415	0.0424	0.029	0.0232	0.0297	0.0252	0.0162		0.00249	0.00641	-0.0021	0.00345	0.00153	0.00258	0.00063	-0.00559		6.2001e-06	4.10881e-05	4.41e-06	1.19025e-05	2.3409e-06	6.6564e-06	3.969e-07	3.12481e-05
57.4	0.04034	0.04641	0.044	0.0335	0.02658	0.03008	0.02678	0.00926		0.0378	0.0415	0.0425	0.029	0.0235	0.0293	0.025	0.0168		0.00254	0.00491	0.0015	0.0045	0.00308	0.00078	0.00178	-0.00754		6.4516e-06	2.41081e-05	2.25e-06	2.025e-05	9.4864e-06	6.084e-07	3.1684e-06	5.68516e-05
57.6	0.03999	0.04511	0.0445	0.0347	0.02628	0.03228	0.02723	0.00916		0.0379	0.0413	0.0424	0.029	0.0237	0.0289	0.0249	0.0171		0.00209	0.00381	0.0021	0.0057	0.00258	0.00338	0.00233	-0.00794		4.3681e-06	1.45161e-05	4.41e-06	3.249e-05	6.6564e-06	1.14244e-05	5.4289e-06	6.30436e-05
57.8	0.04029	0.04691	0.04435	0.03565	0.02483	0.03128	0.02218	0.00806		0.0379	0.0414	0.0423	0.029	0.024	0.0285	0.025	0.0171		0.00239	0.00551	0.00205	0.00665	0.00083	0.00278	-0.00282	-0.00904		5.7121e-06	3.03601e-05	4.2025e-06	4.42225e-05	6.889e-07	7.7284e-06	7.9524e-06	8.17216e-05
58	0.03929	0.04796	0.0429	0.03775	0.02178	0.03178	0.02563	0.00641		0.0379	0.0414	0.0422	0.029	0.024	0.0282	0.025	0.0164		0.00139	0.00656	0.0007	0.00875	-0.00222	0.00358	0.00063	-0.00999		1.9321e-06	4.30336e-05	4.9e-07	7.65625e-05	4.9284e-06	1.28164e-05	3.969e-07	9.98001e-05
58.2	0.03889	0.04771	0.04365	0.03545	0.02333	0.03128	0.02398	0.00636		0.0377	0.0416	0.0422	0.0289	0.0238	0.0282	0.025	0.0157		0.00119	0.00611	0.00145	0.00655	-0.00047	0.00308	-0.00102	-0.00934		1.4161e-06	3.73321e-05	2.1025e-06	4.29025e-05	2.209e-07	9.4864e-06	1.0404e-06	8.72356e-05
58.4	0.03924	0.04696	0.0409	0.03015	0.02478	0.03193	0.02653	0.00866		0.0376	0.0417	0.0422	0.029	0.0235	0.0284	0.0249	0.0154		0.00164	0.00526	-0.0013	0.00115	0.00128	0.00353	0.00163	-0.00674		2.6896e-06	2.76676e-05	1.69e-06	1.3225e-06	1.6384e-06	1.24609e-05	2.6569e-06	4.54276e-05
58.6	0.04034	0.04641	0.0404	0.03315	0.02518	0.03053	0.02438	0.01056		0.0376	0.0418	0.0422	0.0289	0.0233	0.0287	0.0249	0.0155		0.00274	0.00461	-0.0018	0.00425	0.00188	0.00183	-0.00052	-0.00494		7.5076e-06	2.12521e-05	3.24e-06	1.80625e-05	3.5344e-06	3.3489e-06	2.704e-07	2.44036e-05
58.8	0.03974	0.04586	0.04215	0.03125	0.02648	0.03018	0.02423	0.00891		0.0377	0.0419	0.0422	0.0289	0.0232	0.0289	0.0249	0.0158		0.00204	0.00396	-5e-05	0.00235	0.00328	0.00128	-0.00067	-0.00689		4.1616e-06	1.56816e-05	2.5e-09	5.5225e-06	1.07584e-05	1.6384e-06	4.489e-07	4.74721e-05
59
59.2
59.4
59.6
59.8

## Sheet: PPMCC
t	S3	S4	S5	S6	S7	S8	S9	S10			t	HEC_M10_P3	HEC_M10_P4	HEC_M10_P5	HEC_M10_P6	HEC_M10_P7	HEC_M10_P8	HEC_M10_P9	HEC_M10_P10		HEC_M0.1_P3	HEC_M0.1_P4	HEC_M0.1_P5	HEC_M0.1_P6	HEC_M0.1_P7	HEC_M0.1_P8	HEC_M0.1_P9	HEC_M0.1_P10		HEC_M1_P3	HEC_M1_P4	HEC_M1_P5	HEC_M1_P6	HEC_M1_P7	HEC_M1_P8	HEC_M1_P9	HEC_M1_P10			t	HEC_P3	HEC_P4	HEC_P5	HEC_P6	HEC_P7	HEC_P8	HEC_P9	HEC_P10
0	-1e-05	-4e-05	0	-0.00015	-2e-05	-7e-05	3e-05	1e-05			0	0	0	0	0	0	0	0	0		0	0	0	0	0	0	0	0		0	0	0	0	0	0	0	0			0	0	0	0	0	0	0	0	0
0.2	-6e-05	1e-05	-5e-05	0.00015	8e-05	0.00013	-0.00017	1e-05			0.2	0	0	0	0	0	0	0	0		0	0	0	0	0	0	0	0		0	0	0	0	0	0	0	0			0.2	0	0	0	0	0	0	0	0
0.4	0.00014	0.00011	5e-05	5e-05	3e-05	3e-05	-2e-05	1e-05			0.4	0	0	0	0	0	0	0	0		0	0	0	0	0	0	0	0		0	0	0	0	0	0	0	0			0.4	0	0	0	0	0	0	0	0
0.6	-1e-05	-9e-05	-0.0001	-5e-05	-7e-05	8e-05	-2e-05	-4e-05			0.6	0	0	0	0	0	0	0	0		0	0	0	0	0	0	0	0		0	0	0	0	0	0	0	0			0.6	0	0	0	0	0	0	0	0
0.8	-0.00016	-4e-05	5e-05	-5e-05	-0.00012	8e-05	-2e-05	6e-05			0.8	0	0	0	0	0	0	0	0		0	0	0	0	0	0	0	0		0	0	0	0	0	0	0	0			0.8	0	0	0	0	0	0	0	0
1	4e-05	1e-05	0.00015	-0.00015	-0.00017	0.00018	-7e-05	1e-05			1	0	0	0	0	0	0	0	0		0	0	0	0	0	0	0	0		0	0	0	0	0	0	0	0			1	0	0	0	0	0	0	0	0
1.2	-6e-05	0.00011	-0.0001	0.0002	0.00013	8e-05	-2e-05	-4e-05			1.2	0	0	0	0	0	0	0	0		0	0	0	0	0	0	0	0		0	0	0	0	0	0	0	0			1.2	0	0	0	0	0	0	0	0
1.4	0.00039	-9e-05	0.00015	0	0.00013	0.00033	-7e-05	-4e-05			1.4	0	0	0	0	0	0	0	0		0	0	0	0	0	0	0	0		0	0	0	0	0	0	0	0			1.4	0	0	0	0	0	0	0	0
1.6	-6e-05	1e-05	5e-05	-5e-05	8e-05	3e-05	-2e-05	-4e-05			1.6	0	0	0	0	0	0	0	0		0	0	0	0	0	0	0	0		0	0	0	0	0	0	0	0			1.6	0	0	0	0	0	0	0	0
1.8	-0.00016	1e-05	0.0001	-5e-05	-2e-05	-2e-05	3e-05	-4e-05			1.8	0	0	0	0	0	0	0	0		0	0	0	0	0	0	0	0		0	0	0	0	0	0	0	0			1.8	0	0	0	0	0	0	0	0
2	9e-05	0.00011	0	-0.00015	-2e-05	-7e-05	3e-05	1e-05			2	0	0	0	0	0	0	0	0		0	0	0	0	0	0	0	0		0	0	0	0	0	0	0	0			2	0	0	0	0	0	0	0	0
2.2	-1e-05	-0.00014	0	0.00015	8e-05	-0.00017	3e-05	6e-05			2.2	0	0	0	0	0	0	0	0		0	0	0	0	0	0	0	0		0	0	0	0	0	0	0	0			2.2	0	0	0	0	0	0	0	0
2.4	9e-05	1e-05	-0.00015	0	-2e-05	-7e-05	8e-05	6e-05			2.4	0	0	0	0	0	0	0	0		0	0	0	0	0	0	0	0		0	0	0	0	0	0	0	0			2.4	0	0	0	0	0	0	0	0
2.6	-6e-05	1e-05	5e-05	0	-7e-05	-0.00022	8e-05	0.00011			2.6	0	0	0	0	0	0	0	0		0	0	0	0	0	0	0	0		0	0	0	0	0	0	0	0			2.6	0	0	0	0	0	0	0	0
2.8	-0.00016	0.00011	-0.0001	-5e-05	-0.00012	-0.00012	0.00013	0.00011			2.8	0	0	0	0	0	0	0	0		0	0	0	0	0	0	0	0		0	0	0	0	0	0	0	0			2.8	0	0	0	0	0	0	0	0
3	4e-05	-9e-05	0	-0.00015	-0.00012	-0.00017	0.00013	0.00011			3	0	0	0	0	0	0	0	0		0	0	0	0	0	0	0	0		0	0	0	0	0	0	0	0			3	0	0	0	0	0	0	0	0
3.2	-1e-05	-4e-05	-0.0001	0.00015	0.00023	-7e-05	0.00028	0.00011			3.2	0	0	0	0	0	0	0	0		0	0	0	0	0	0	0	0		0	0	0	0	0	0	0	0			3.2	0	0	0	0	0	0	0	0
3.4	-0.00011	-4e-05	0.0001	0	0.00013	-0.00017	3e-05	0.00036			3.4	0	0	0	0	0	0	0	0		0	0	0	0	0	0	0	0		0	0	0	0	0	0	0	0			3.4	0	0	0	0	0	0	0	0
3.6	-6e-05	0.00011	0.0001	0	-2e-05	-7e-05	-0.00012	0.00011			3.6	0	0	0	0	0	0	0	0		0	0	0	0	0	0	0	0		0	0	0	0	0	0	0	0			3.6	0	0	0	0	0	0	0	0
3.8	-0.00011	-9e-05	0	-0.0001	-2e-05	-0.00017	-0.00012	1e-05			3.8	0	0	0	0	0	0	0	0		0	0	0	0	0	0	0	0		0	0	0	0	0	0	0	0			3.8	0	0	0	0	0	0	0	0
4	9e-05	6e-05	0.0003	-0.0002	-2e-05	-7e-05	-0.00022	-9e-05			4	0	0	0	0	0	0	0	0		0	0	0	0	0	0	0	0		0	0	0	0	0	0	0	0			4	0	0	0	0	0	0	0	0
4.2	-6e-05	1e-05	-5e-05	0.0001	3e-05	-0.00017	-0.00012	-0.00014			4.2	0	0	0	0	0	0	0	0		0	0	0	0	0	0	0	0		0	0	0	0	0	0	0	0			4.2	0	0	0	0	0	0	0	0
4.4	-0.00016	0.00011	0.00015	0	-2e-05	3e-05	-0.00012	-0.00014			4.4	0	0	0	0	0	0	0	0		0	0	0	0	0	0	0	0		0	0	0	0	0	0	0	0			4.4	0	0	0	0	0	0	0	0
4.6	-6e-05	-0.00014	-5e-05	-0.0001	-7e-05	-0.00012	-7e-05	-0.00014			4.6	0	0	0	0	0	0	0	0		0	0	0	0	0	0	0	0		0	0	0	0	0	0	0	0			4.6	0	0	0	0	0	0	0	0
4.8	-0.00011	1e-05	0.0001	-0.0001	-0.00017	3e-05	-0.00012	-0.00014			4.8	0	0	0	0	0	0	0	0		0	0	0	0	0	0	0	0		0	0	0	0	0	0	0	0			4.8	0	0	0	0	0	0	0	0
5	9e-05	1e-05	-0.0001	-0.0002	-7e-05	-7e-05	-0.00012	-0.00014			5	0	0	0	0	0	0	0	0		0	0	0	0	0	0	0	0		0	0	0	0	0	0	0	0			5	0	0	0	0	0	0	0	0
5.2	-1e-05	0.00016	5e-05	0.0001	0.00013	3e-05	-7e-05	-9e-05			5.2	0	0	0	0	0	0	0	0		0	0	0	0	0	0	0	0		0	0	0	0	0	0	0	0			5.2	0	0	0	0	0	0	0	0
5.4	-0.00021	-0.00014	-0.0001	-5e-05	0.00013	-7e-05	-2e-05	-9e-05			5.4	0	0	0	0	0	0	0	0		0	0	0	0	0	0	0	0		0	0	0	0	0	0	0	0			5.4	0	0	0	0	0	0	0	0
5.6	-1e-05	1e-05	0	0	3e-05	8e-05	-2e-05	-4e-05			5.6	0	0	0	0	0	0	0	0		0	0	0	0	0	0	0	0		0	0	0	0	0	0	0	0			5.6	0	0	0	0	0	0	0	0
5.8	-6e-05	1e-05	-0.00015	-0.0001	-2e-05	-2e-05	3e-05	-4e-05			5.8	0	0	0	0	0	0	0	0		0	0	0	0	0	0	0	0		0	0	0	0	0	0	0	0			5.8	0	0	0	0	0	0	0	0
6	9e-05	0.00011	5e-05	-0.00015	-2e-05	0.00028	-2e-05	1e-05			6	0	0	0	0	0	0	0	0		0	0	0	0	0	0	0	0		0	0	0	0	0	0	0	0			6	0	0	0	0	0	0	0	0
6.2	4e-05	-9e-05	5e-05	5e-05	3e-05	-7e-05	-7e-05	-4e-05			6.2	0	0	0	0	0	0	0	0		0	0	0	0	0	0	0	0		0	0	0	0	0	0	0	0			6.2	0	0	0	0	0	0	0	0
6.4	-0.00016	1e-05	0.0001	-5e-05	-7e-05	-2e-05	3e-05	-9e-05			6.4	0	0	0	0	0	0	0	0		0	0	0	0	0	0	0	0		0	0	0	0	0	0	0	0			6.4	0	0	0	0	0	0	0	0
6.6	4e-05	1e-05	0.00035	0	-7e-05	-7e-05	-7e-05	6e-05			6.6	0	0	0	0	0	0	0	0		0	0	0	0	0	0	0	0		0	0	0	0	0	0	0	0			6.6	0	0	0	0	0	0	0	0
6.8	-0.00011	0.00011	0	-0.0001	-0.00012	-0.00022	-7e-05	-4e-05			6.8	0	0	0	0	0	0	0	0		0	0	0	0	0	0	0	0		0	0	0	0	0	0	0	0			6.8	0	0	0	0	0	0	0	0
7	9e-05	-9e-05	0.00015	-5e-05	-2e-05	-0.00017	-7e-05	-4e-05			7	0	0	0	0	0	0	0	0		0	0	0	0	0	0	0	0		0	0	0	0	0	0	0	0			7	0	0	0	0	0	0	0	0
7.2	-6e-05	1e-05	0	5e-05	0.00013	-0.00022	-7e-05	1e-05			7.2	0	0	0	0	0	0	0	0		0	0	0	0	0	0	0	0		0	0	0	0	0	0	0	0			7.2	0	0	0	0	0	0	0	0
7.4	-0.00016	1e-05	5e-05	-5e-05	8e-05	-0.00012	-2e-05	-4e-05			7.4	0	0	0	0	0	0	0	0		0	0	0	0	0	0	0	0		0	0	0	0	0	0	0	0			7.4	0	0	0	0	0	0	0	0
7.6	-1e-05	0.00016	-0.0001	0	3e-05	-0.00022	-2e-05	1e-05			7.6	0	0	0	0	0	0	0	0		0	0	0	0	0	0	0	0		0	0	0	0	0	0	0	0			7.6	0	0	0	0	0	0	0	0
7.8	-0.00011	-9e-05	5e-05	-0.00015	-2e-05	-7e-05	-2e-05	1e-05			7.8	0	0	0	0	0	0	0	0		0	0	0	0	0	0	0	0		0	0	0	0	0	0	0	0			7.8	0	0	0	0	0	0	0	0
8	0.00029	1e-05	-0.00015	0.00015	3e-05	-0.00022	-2e-05	1e-05			8	0	0	0	0	0	0	0	0		0	0	0	0	0	0	0	0		0	0	0	0	0	0	0	0			8	0	0	0	0	0	0	0	0
8.2	-0.00011	1e-05	0	0.0001	-2e-05	-7e-05	3e-05	1e-05			8.2	0	0	0	0	0	0	0	0		0	0	0	0	0	0	0	0		0	0	0	0	0	0	0	0			8.2	0	0	0	0	0	0	0	0
8.4	-0.00016	0.00021	-0.0002	-5e-05	-2e-05	-0.00022	3e-05	6e-05			8.4	0	0	0	0	0	0	0	0		0	0	0	0	0	0	0	0		0	0	0	0	0	0	0	0			8.4	0	0	0	0	0	0	0	0
8.6	-1e-05	-0.00014	5e-05	-5e-05	-0.00012	3e-05	8e-05	0.00011			8.6	0	0	0	0	0	0	0	0		0	0	0	0	0	0	0	0		0	0	0	0	0	0	0	0			8.6	0	0	0	0	0	0	0	0
8.8	-6e-05	-4e-05	-5e-05	-0.00015	-0.00017	-0.00017	8e-05	6e-05			8.8	0	0	0	0	0	0	0	0		0	0	0	0	0	0	0	0		0	0	0	0	0	0	0	0			8.8	0	0	0	0	0	0	0	0
9	4e-05	1e-05	5e-05	0.00025	3e-05	-2e-05	0.00028	0.00011			9	0	0	0	0	0	0	0	0		0	0	0	0	0	0	0	0		0	0	0	0	0	0	0	0			9	0	0	0	0	0	0	0	0
9.2	-0.00011	0.00031	0.00035	5e-05	8e-05	-0.00012	3e-05	0.00016			9.2	0	0	0	0	0	0	0	0		0	0	0	0	0	0	0	0		0	0	0	0	0	0	0	0			9.2	0	0	0	0	0	0	0	0
9.4	-0.00016	-0.00014	-5e-05	-5e-05	3e-05	-2e-05	-7e-05	0.00016			9.4	0	0	0	0	0	0	0	0		0	0	0	0	0	0	0	0		0	0	0	0	0	0	0	0			9.4	0	0	0	0	0	0	0	0
9.6	4e-05	-0.00024	0.0001	-5e-05	-2e-05	-0.00012	-0.00017	6e-05			9.6	0	0	0	0	0	0	0	0		0	0	0	0	0	0	0	0		0	0	0	0	0	0	0	0			9.6	0	0	0	0	0	0	0	0
9.8	-1e-05	1e-05	-5e-05	-0.00015	-7e-05	8e-05	-0.00012	-0.00014			9.8	0	0	0	0	0	0	0	0		0	0	0	0	0	0	0	0		0	0	0	0	0	0	0	0			9.8	0	0	0	0	0	0	0	0
10	-0.00011	0.00041	0	0.0001	3e-05	-7e-05	-0.00017	-0.00019			10	0	0	0	0	0	0	0	0		0	0	0	0	0	0	0	0		0	0	0	0	0	0	0	0			10	0	0	0	0	0	0	0	0
10.2	-0.00011	-4e-05	-0.0001	-5e-05	-2e-05	0.00023	-0.00017	-0.00019			10.2	0	0	0	0	0	0	0	0		0	0	0	0	0	0	0	0		0	0	0	0	0	0	0	0			10.2	0	0	0	0	0	0	0	0
10.4	-0.00016	-0.00024	5e-05	-5e-05	-2e-05	-0.00012	-0.00017	-0.00014			10.4	0	0	0	0	0	0	0	0		0	0	0	0	0	0	0	0		0	0	0	0	0	0	0	0			10.4	0	0	0	0	0	0	0	0
10.6	4e-05	1e-05	-0.00015	-5e-05	-0.00012	-0.00012	-0.00012	-0.00019			10.6	0	0	0	0	0	0	0	0		0	0	0	0	0	0	0	0		0	0	0	0	0	0	0	0			10.6	0	0	0	0	0	0	0	0
10.8	-6e-05	0.00066	-5e-05	-0.0002	-0.00017	-0.00017	-0.00012	-0.00014			10.8	0	0	0	0	0	0	0	0		0	0	0	0	0	0	0	0		0	0	0	0	0	0	0	0			10.8	0	0	0	0	0	0	0	0
11	-0.00016	0.01081	-0.00015	0.0001	0.00013	-0.00027	-7e-05	-0.00014			11	0	0	0	0	0	0	0	0		0	0	0	0	0	0	0	0		0	0	0	0	0	0	0	0			11	0	0	0	0	0	0	0	0
11.2	0.00204	0.01051	5e-05	0	8e-05	-0.00012	-7e-05	-9e-05			11.2	0	0	0	0	0	0	0	0		0	0	0	0	0	0	0	0		0	0	0	0	0	0	0	0			11.2	0	0	0	0	0	0	0	0
11.4	0.00929	0.01211	0.00365	0	3e-05	-0.00032	-7e-05	-9e-05			11.4	0	0	0	0	0	0	0	0		0	0	0	0	0	0	0	0		0	0	0	0	0	0	0	0			11.4	0	0.0038	0	0	0	0	0	0
11.6	0.01154	0.01786	0.01275	-0.0001	3e-05	-0.00017	-2e-05	-4e-05			11.6	0	0.0338	0	0	0	0	0	0		0	0.034	0	0	0	0	0	0		0	0.0341	0	0	0	0	0	0			11.6	0	0.0322	0	0	0	0	0	0
11.8	0.01224	0.02656	0.01795	-0.0002	-0.00012	-0.00027	-2e-05	-4e-05			11.8	0.0366	0.0664	0	0	0	0	0	0		0.0365	0.0314	0	0	0	0	0	0		0.0367	0.0309	0	0	0	0	0	0			11.8	0.035	0.0706	0	0	0	0	0	0
12	0.01389	0.03236	0.0167	0.0028	-0.00012	-0.00017	-0.00017	-4e-05			12	0.0372	0.0732	0.0378	0.039	0	0	0	0		0.0358	0.0292	0.039	0	0	0	0	0		0.0358	0.0642	0.0359	0	0	0	0	0			12	0.0545	0.0708	0.0386	0	0	0	0	0
12.2	0.01684	0.03216	0.01835	0.00595	-7e-05	-0.00022	-2e-05	-0.00019			12.2	0.0516	0.0702	0.0278	0.0385	0	0	0	0		0.0331	0.0282	0.0385	0	0	0	0	0		0.0491	0.0696	0.0278	0	0	0	0	0			12.2	0.0531	0.0672	0.028	0	0	0	0	0
12.4	0.01794	0.03646	0.0221	0.00635	0.00508	0.00563	-7e-05	1e-05			12.4	0.0508	0.0706	0.0515	0.041	0	0	0	0		0.0326	0.023	0.041	0	0	0	0	0		0.05	0.0696	0.0348	0	0	0	0	0			12.4	0.0507	0.0689	0.0522	0	0	0	0	0
12.6	0.01994	0.03596	0.0244	0.0134	0.00718	0.01163	-7e-05	1e-05			12.6	0.0527	0.0713	0.0452	0.0416	0	0	0	0		0.0326	0.0214	0.0416	0.0272	0	0	0	0		0.0515	0.0688	0.0436	0.0169	0	0	0	0			12.6	0.052	0.0741	0.0475	0.0151	0	0	0	0
12.8	0.02579	0.04336	0.0287	0.01565	0.00888	0.01123	-7e-05	-4e-05			12.8	0.0619	0.0748	0.0374	0.0426	0	0.0146	0	0		0.0338	0	0.0426	0.0288	0	0.0305	0	0		0.0585	0.0711	0.0298	0.0217	0	0.0157	0	0			12.8	0.0612	0.0781	0.0432	0.0192	0	0.0137	0	0
13	0.03714	0.05026	0.03785	0.01655	0.00933	0.02568	0.00263	-4e-05			13	0.06	0.0776	0.0652	0.0427	0.0118	0.0098	0	0		0.0332	0.0214	0.0427	0.03	0.0263	0.0348	0	0		0.0591	0.0727	0.0367	0.0176	0.0181	0.012	0	0			13	0.0603	0.0792	0.0753	0.0175	0.0151	0.0102	0	0
13.2	0.04459	0.05761	0.0466	0.01715	0.00873	0.03688	0.00498	-4e-05			13.2	0.059	0.0778	0.0734	0.044	0.0111	0.0253	0	0		0.0344	0.026	0.044	0.0308	0.0282	0.0395	0.0229	0		0.0576	0.0741	0.0596	0.0268	0.0124	0.025	0	0			13.2	0.0587	0.0777	0.0724	0.0403	0.0107	0.0268	0	0
13.4	0.04989	0.06971	0.0498	0.02405	0.01243	0.03593	0.00293	-4e-05			13.4	0.0644	0.0787	0.0669	0.0433	0.0103	0.0255	0.0078	0		0.044	0.0264	0.0433	0.0323	0.0309	0.0417	0.0254	0		0.0635	0.0751	0.0606	0.0317	0.0117	0.0253	0.0086	0			13.4	0.0645	0.08	0.0693	0.0311	0.0112	0.0278	0.0078	0
13.6	0.06959	0.07761	0.0514	0.02615	0.01448	0.03508	0.00383	0.00116			13.6	0.0649	0.0824	0.0692	0.043	0.0118	0.0308	0.0055	0		0.049	0.0285	0.043	0.0321	0.0345	0.0438	0.0258	0		0.0643	0.078	0.0567	0.0264	0.0147	0.0287	0.0094	0			13.6	0.064	0.0832	0.0679	0.0248	0.0116	0.0345	0.0049	0
13.8	0.07604	0.09786	0.0611	0.0335	0.01423	0.03808	0.00793	0.00371			13.8	0.0692	0.0842	0.0676	0.0463	0.0116	0.0294	0.0085	0		0.0497	0.0266	0.0463	0.0318	0.0349	0.0435	0.0273	0.0196		0.0681	0.08	0.0601	0.0257	0.0164	0.0294	0.011	0			13.8	0.0713	0.0853	0.0666	0.0328	0.0114	0.0328	0.0071	0
14	0.07349	0.09986	0.0654	0.03585	0.01748	0.04083	0.01478	0.00296			14	0.0697	0.0861	0.0709	0.0477	0.032	0.0276	0.0207	0		0.0506	0.0293	0.0477	0.0337	0.0446	0.0437	0.0267	0.0213		0.0682	0.0837	0.0604	0.0283	0.0238	0.029	0.0127	0			14	0.0711	0.0859	0.0708	0.0313	0.0309	0.0315	0.0199	0
14.2	0.07234	0.09626	0.0739	0.0494	0.01353	0.03683	0.01713	0.00521			14.2	0.0694	0.0865	0.0758	0.0478	0.0325	0.0294	0.0196	0		0.0498	0.0289	0.0478	0.0352	0.0409	0.0491	0.0285	0.0227		0.0676	0.0854	0.0694	0.0302	0.0312	0.0305	0.0201	0			14.2	0.0715	0.0859	0.0744	0.0395	0.0318	0.0332	0.02	0
14.4	0.07174	0.07411	0.0755	0.05075	0.01613	0.03723	0.01978	0.01086			14.4	0.0706	0.0866	0.0727	0.0483	0.0312	0.0343	0.0246	0.0221		0.0505	0.0295	0.0483	0.0353	0.0412	0.0467	0.0366	0.0293		0.0672	0.0849	0.0708	0.0334	0.032	0.0332	0.0233	0.0229			14.4	0.072	0.0853	0.0746	0.0426	0.0297	0.0368	0.03	0.0129
14.6	0.06834	0.06826	0.077	0.0545	0.02118	0.03538	0.02338	0.01176			14.6	0.07	0.0861	0.0737	0.0487	0.0298	0.0335	0.0258	0.019		0.0505	0.0288	0.0487	0.0365	0.0405	0.0485	0.0354	0.0286		0.0684	0.0819	0.0697	0.0391	0.0306	0.0361	0.0255	0.017			14.6	0.0708	0.0853	0.0746	0.0447	0.0307	0.0344	0.025	0.0197
14.8	0.06979	0.06686	0.071	0.05585	0.02933	0.04408	0.01983	0.00971			14.8	0.0692	0.0844	0.0748	0.0493	0.0306	0.0343	0.0209	0.0128		0.0505	0.0284	0.0493	0.0369	0.041	0.0512	0.0373	0.0312		0.0683	0.082	0.0686	0.0368	0.0312	0.0372	0.0221	0.0134			14.8	0.0704	0.0852	0.0745	0.0516	0.0303	0.0363	0.0271	0.0146
15	0.06729	0.05431	0.0706	0.05295	0.02458	0.04708	0.02123	0.00966			15	0.0693	0.0852	0.074	0.0486	0.031	0.0354	0.0281	0.0139		0.0506	0.0307	0.0486	0.0377	0.0412	0.0518	0.0402	0.0315		0.0677	0.0833	0.0685	0.0385	0.0319	0.0383	0.0262	0.0127			15	0.071	0.0865	0.0756	0.0462	0.0313	0.0363	0.0301	0.0137
15.2	0.05639	0.06126	0.0714	0.05065	0.02568	0.04873	0.02823	0.01201			15.2	0.07	0.0859	0.0723	0.0493	0.0326	0.0364	0.0275	0.0141		0.0509	0.0334	0.0493	0.0375	0.0415	0.0516	0.0438	0.0342		0.0688	0.0831	0.0696	0.0411	0.0329	0.0389	0.0269	0.0135			15.2	0.0707	0.087	0.0752	0.0437	0.032	0.039	0.0318	0.0161
15.4	0.05179	0.05901	0.07695	0.0519	0.02878	0.04558	0.02578	0.01696			15.4	0.0726	0.0871	0.0713	0.0494	0.0335	0.0369	0.0293	0.018		0.0523	0.0371	0.0494	0.0381	0.0416	0.051	0.0437	0.0351		0.0711	0.0841	0.071	0.0426	0.0337	0.0397	0.0284	0.0168			15.4	0.0727	0.0885	0.073	0.0463	0.0337	0.0398	0.0313	0.0197
15.6	0.04294	0.05846	0.07595	0.06815	0.03343	0.04438	0.02938	0.01666			15.6	0.0721	0.0883	0.0718	0.0499	0.0341	0.0371	0.0301	0.0221		0.0524	0.0415	0.0499	0.0397	0.0422	0.0528	0.0437	0.037		0.0707	0.0858	0.0718	0.0448	0.0367	0.0419	0.0298	0.0211			15.6	0.0735	0.0897	0.0721	0.046	0.0344	0.04	0.0317	0.0223
15.8	0.05719	0.06526	0.0763	0.06585	0.03823	0.04713	0.02868	0.01861			15.8	0.0741	0.0892	0.0724	0.0517	0.0339	0.0386	0.0308	0.0184		0.0536	0.0474	0.0517	0.0398	0.0434	0.0519	0.0453	0.0378		0.0711	0.0864	0.0717	0.0473	0.0387	0.0444	0.0329	0.0197			15.8	0.0754	0.0889	0.0726	0.0473	0.0345	0.043	0.0341	0.0177
16	0.05904	0.06071	0.0817	0.0582	0.03218	0.05343	0.03658	0.01636			16	0.0732	0.0899	0.074	0.0513	0.0343	0.0412	0.0344	0.0179		0.0527	0.0523	0.0513	0.0419	0.0433	0.0529	0.0462	0.0386		0.0716	0.0875	0.0717	0.05	0.041	0.0464	0.0372	0.0187			16	0.0742	0.09	0.0754	0.0509	0.0349	0.0455	0.0375	0.0168
16.2	0.06914	0.06146	0.0814	0.06375	0.02833	0.05068	0.03503	0.02056			16.2	0.0737	0.0894	0.0751	0.0539	0.0349	0.0446	0.0368	0.0193		0.0528	0.056	0.0539	0.0442	0.0438	0.0545	0.047	0.0399		0.0719	0.0861	0.072	0.0513	0.0433	0.0486	0.0388	0.0204			16.2	0.0744	0.0909	0.0774	0.0525	0.0342	0.0484	0.0387	0.018
16.4	0.06989	0.07661	0.0782	0.05895	0.03993	0.05153	0.03643	0.01381			16.4	0.0735	0.0908	0.0762	0.0544	0.0366	0.0459	0.0383	0.0211		0.0529	0.059	0.0544	0.0468	0.0444	0.0543	0.0482	0.0393		0.0713	0.0882	0.0716	0.0515	0.0453	0.05	0.0409	0.0207			16.4	0.0747	0.0903	0.079	0.0523	0.0372	0.0495	0.0415	0.0208
16.6	0.07379	0.06681	0.082	0.0592	0.04083	0.05138	0.03693	0.01701			16.6	0.0739	0.0914	0.0759	0.0559	0.0394	0.0466	0.0392	0.0214		0.0536	0.0593	0.0559	0.048	0.0442	0.0551	0.0473	0.0402		0.0713	0.0876	0.0718	0.0513	0.046	0.0505	0.0426	0.0211			16.6	0.076	0.0922	0.0783	0.0529	0.0412	0.0502	0.0425	0.0213
16.8	0.07604	0.08126	0.07955	0.06915	0.04373	0.05268	0.03763	0.02261			16.8	0.077	0.0911	0.0753	0.0564	0.0421	0.0469	0.0409	0.0206		0.0549	0.0584	0.0564	0.0481	0.0446	0.0551	0.0478	0.0411		0.0747	0.0869	0.0732	0.0516	0.0465	0.0511	0.0437	0.0216			16.8	0.0767	0.0918	0.0775	0.0559	0.0438	0.0499	0.0447	0.0215
17	0.07794	0.07866	0.0755	0.06865	0.04203	0.05548	0.04463	0.02211			17	0.0765	0.0922	0.076	0.0566	0.0437	0.0478	0.0415	0.0217		0.0541	0.0605	0.0566	0.0492	0.0452	0.0558	0.0481	0.0413		0.0738	0.0888	0.0733	0.0535	0.0468	0.0517	0.045	0.0234			17	0.0774	0.0913	0.0765	0.0575	0.0461	0.0499	0.0434	0.0215
17.2	0.07469	0.07716	0.08105	0.06565	0.03713	0.05258	0.04333	0.01911			17.2	0.0768	0.0931	0.0754	0.0579	0.0446	0.0504	0.043	0.0211		0.0535	0.0594	0.0579	0.0497	0.0463	0.0559	0.0488	0.0422		0.0735	0.0879	0.0735	0.0564	0.0481	0.0536	0.0459	0.0249			17.2	0.0778	0.0922	0.0767	0.0575	0.0457	0.0525	0.0438	0.0211
17.4	0.07719	0.07941	0.082	0.06695	0.04623	0.05003	0.04313	0.01546			17.4	0.0777	0.0919	0.077	0.0584	0.0435	0.0519	0.0443	0.0214		0.0544	0.0573	0.0584	0.0503	0.0468	0.0559	0.0496	0.0427		0.0752	0.0867	0.0742	0.057	0.0495	0.0549	0.0477	0.0245			17.4	0.0775	0.0923	0.0774	0.0593	0.0447	0.0538	0.0457	0.0214
17.6	0.07644	0.08206	0.08045	0.06735	0.04683	0.05058	0.04453	0.02236			17.6	0.0754	0.0901	0.0786	0.0586	0.0434	0.0515	0.0439	0.0216		0.0528	0.0577	0.0586	0.0511	0.0468	0.0569	0.049	0.0436		0.0736	0.0861	0.0746	0.0581	0.0505	0.0561	0.0481	0.0251			17.6	0.0767	0.0917	0.0793	0.0578	0.0444	0.0532	0.0468	0.0204
17.8	0.07539	0.08211	0.07425	0.06775	0.04773	0.05263	0.04663	0.02091			17.8	0.0745	0.0914	0.0771	0.0575	0.0442	0.0502	0.0452	0.0218		0.0517	0.0599	0.0575	0.0504	0.0469	0.0564	0.0501	0.0439		0.0729	0.0871	0.0744	0.0583	0.0512	0.0565	0.0491	0.0257			17.8	0.0772	0.0911	0.0795	0.0554	0.0447	0.0519	0.0474	0.0214
18	0.07459	0.07896	0.0725	0.0722	0.04173	0.05813	0.04513	0.01526			18	0.076	0.0909	0.0763	0.0575	0.0455	0.0477	0.0451	0.0235		0.0527	0.0584	0.0575	0.0489	0.0464	0.0559	0.0495	0.0431		0.0736	0.0859	0.0745	0.0577	0.051	0.0558	0.0496	0.0255			18	0.0762	0.0904	0.0789	0.0548	0.0464	0.05	0.0467	0.0254
18.2	0.07589	0.07516	0.0737	0.06995	0.04483	0.06038	0.04253	0.01886			18.2	0.0771	0.0885	0.0766	0.0569	0.0482	0.0464	0.0436	0.0242		0.0534	0.0584	0.0569	0.0479	0.0454	0.0545	0.0488	0.0435		0.0744	0.0852	0.0746	0.0578	0.0513	0.0553	0.049	0.0258			18.2	0.077	0.0895	0.0782	0.055	0.05	0.0488	0.0457	0.0229
18.4	0.07639	0.07616	0.07315	0.06665	0.04868	0.05143	0.04403	0.01781			18.4	0.0765	0.0876	0.0754	0.0558	0.0498	0.0472	0.0442	0.0233		0.0523	0.0567	0.0558	0.0488	0.0455	0.0548	0.0479	0.0431		0.0733	0.0849	0.0739	0.0585	0.0515	0.0553	0.049	0.0264			18.4	0.0766	0.0891	0.0767	0.0574	0.0518	0.0492	0.0464	0.0219
18.6	0.07719	0.07821	0.0766	0.0661	0.04678	0.05363	0.05088	0.01821			18.6	0.0749	0.0876	0.0746	0.0559	0.0496	0.0489	0.0456	0.0219		0.0524	0.0573	0.0559	0.0487	0.0459	0.0538	0.0488	0.0433		0.0732	0.0848	0.073	0.0595	0.0516	0.0559	0.0497	0.0268			18.6	0.0765	0.0887	0.076	0.0611	0.0505	0.0505	0.0472	0.0223
18.8	0.07559	0.07751	0.07355	0.0696	0.04058	0.05628	0.04728	0.02026			18.8	0.0747	0.0872	0.075	0.0558	0.0482	0.0507	0.046	0.0224		0.051	0.0558	0.0558	0.0484	0.0454	0.0544	0.049	0.0429		0.0729	0.0839	0.0731	0.0594	0.052	0.0563	0.0501	0.0268			18.8	0.0753	0.0883	0.0759	0.0622	0.0476	0.0529	0.048	0.0224
19	0.07604	0.07886	0.075	0.066	0.04123	0.05663	0.04368	0.01861			19	0.0735	0.0877	0.0751	0.0566	0.0468	0.051	0.0461	0.0241		0.0512	0.055	0.0566	0.0479	0.0447	0.0541	0.0483	0.0432		0.0726	0.0836	0.0736	0.0592	0.052	0.0565	0.0501	0.0273			19	0.0746	0.0876	0.0763	0.0609	0.0456	0.0535	0.0484	0.0236
19.2	0.07449	0.07701	0.07315	0.0656	0.04068	0.05543	0.04853	0.01326			19.2	0.0718	0.0864	0.075	0.0554	0.0455	0.0504	0.0466	0.0228		0.0505	0.0546	0.0554	0.0478	0.0444	0.0538	0.0479	0.0426		0.0704	0.0826	0.0735	0.0586	0.0518	0.0562	0.0504	0.0271			19.2	0.0742	0.0864	0.0762	0.0591	0.0447	0.0529	0.0478	0.0215
19.4	0.07524	0.08196	0.06975	0.06485	0.04548	0.04843	0.04173	0.01371			19.4	0.0726	0.0849	0.0745	0.0542	0.045	0.0493	0.0462	0.0207		0.0496	0.053	0.0542	0.0475	0.0438	0.0538	0.0478	0.0428		0.0697	0.0818	0.0727	0.0586	0.0516	0.0559	0.05	0.0267			19.4	0.0726	0.0849	0.076	0.057	0.0451	0.0504	0.0475	0.021
19.6	0.07454	0.08271	0.0712	0.07045	0.04978	0.04818	0.04498	0.01971			19.6	0.0722	0.0835	0.073	0.0539	0.0455	0.0484	0.0456	0.0219		0.0492	0.0526	0.0539	0.0465	0.0436	0.053	0.0478	0.042		0.0701	0.0807	0.0711	0.0582	0.0518	0.0556	0.0496	0.0265			19.6	0.0721	0.0841	0.0751	0.0554	0.0466	0.0482	0.0468	0.0222
19.8	0.07154	0.07421	0.07345	0.0698	0.04628	0.05408	0.04433	0.02181			19.8	0.0718	0.0825	0.0714	0.0531	0.0469	0.0481	0.0453	0.0241		0.0487	0.0524	0.0531	0.0459	0.0433	0.0522	0.0468	0.0416		0.0686	0.0793	0.0698	0.0585	0.0515	0.0551	0.0492	0.0268			19.8	0.0725	0.0825	0.0737	0.0552	0.0487	0.0473	0.0465	0.0234
20	0.07534	0.07441	0.0734	0.0655	0.04163	0.05608	0.04308	0.01561			20	0.0711	0.0813	0.0712	0.0525	0.0483	0.0487	0.045	0.0249		0.0483	0.051	0.0525	0.0459	0.0431	0.0513	0.0463	0.0417		0.068	0.0783	0.0696	0.0582	0.0507	0.0547	0.0492	0.0264			20	0.072	0.0808	0.073	0.0563	0.0491	0.0478	0.0455	0.0248
20.2	0.07239	0.07361	0.0747	0.0646	0.04013	0.05683	0.04483	0.01146			20.2	0.0704	0.0807	0.0721	0.0522	0.0484	0.0501	0.0451	0.0229		0.0477	0.0496	0.0522	0.0458	0.042	0.0511	0.0462	0.0416		0.0684	0.0784	0.0695	0.0577	0.05	0.0547	0.0489	0.0258			20.2	0.0712	0.0805	0.0724	0.057	0.0473	0.0503	0.0447	0.021
20.4	0.07379	0.06721	0.0711	0.05895	0.04153	0.05318	0.04933	0.01681			20.4	0.0698	0.0802	0.0722	0.0515	0.0476	0.0515	0.0451	0.021		0.047	0.0497	0.0515	0.0449	0.0414	0.0508	0.0456	0.0406		0.0678	0.0775	0.069	0.0573	0.0497	0.0548	0.0488	0.0256			20.4	0.0707	0.0798	0.0722	0.0574	0.0451	0.0525	0.0444	0.0194
20.6	0.07119	0.07326	0.06915	0.0593	0.04378	0.05418	0.05028	0.02081			20.6	0.0686	0.0791	0.0714	0.0511	0.0468	0.0516	0.046	0.0215		0.0462	0.0497	0.0511	0.0444	0.0412	0.0503	0.0447	0.0399		0.067	0.0771	0.0686	0.0572	0.0498	0.0545	0.0487	0.0257			20.6	0.0704	0.0789	0.0724	0.0567	0.0444	0.0525	0.0453	0.0207
20.8	0.06954	0.06861	0.067	0.06415	0.04213	0.04708	0.04323	0.02661			20.8	0.0686	0.079	0.0712	0.0509	0.0464	0.0507	0.047	0.022		0.0462	0.0496	0.0509	0.0437	0.0409	0.0495	0.0444	0.0396		0.0662	0.076	0.0685	0.0573	0.0495	0.0538	0.0485	0.026			20.8	0.0693	0.0789	0.0721	0.056	0.0453	0.0511	0.0461	0.0224
21	0.07104	0.06891	0.0694	0.0638	0.03858	0.04653	0.04183	0.01881			21	0.0683	0.0788	0.0704	0.0504	0.0465	0.049	0.0466	0.0225		0.046	0.0489	0.0504	0.0434	0.0402	0.0494	0.0438	0.0395		0.0662	0.0758	0.0682	0.0571	0.0491	0.0535	0.0479	0.0258			21	0.0686	0.0787	0.0716	0.0559	0.0465	0.0493	0.0463	0.0245
21.2	0.06999	0.07491	0.0691	0.0642	0.03958	0.05513	0.03598	0.01566			21.2	0.0684	0.0778	0.0694	0.0501	0.0469	0.0479	0.0459	0.0227		0.0457	0.048	0.0501	0.0433	0.0395	0.0488	0.0435	0.0393		0.0663	0.0749	0.0677	0.0569	0.0488	0.0533	0.0474	0.0256			21.2	0.0682	0.079	0.0712	0.0558	0.0467	0.0488	0.0458	0.0212
21.4	0.07214	0.07586	0.07055	0.06075	0.03943	0.05383	0.04308	0.01196			21.4	0.0684	0.0774	0.0689	0.0498	0.0467	0.0479	0.0453	0.0205		0.0452	0.0476	0.0498	0.0428	0.0393	0.0487	0.0431	0.0385		0.066	0.0743	0.0673	0.0566	0.0487	0.0533	0.0472	0.0255			21.4	0.0685	0.0785	0.0701	0.056	0.0461	0.049	0.0455	0.0191
21.6	0.06904	0.07771	0.06605	0.06015	0.04333	0.05838	0.04688	0.02446			21.6	0.0677	0.0776	0.0686	0.0492	0.0459	0.0485	0.0449	0.0208		0.0445	0.0476	0.0492	0.0424	0.0389	0.048	0.0427	0.0381		0.0651	0.0736	0.0669	0.0564	0.0482	0.0533	0.0471	0.0254			21.6	0.0686	0.0777	0.0692	0.0565	0.0449	0.0498	0.0464	0.0208
21.8	0.07029	0.07616	0.06255	0.0651	0.04113	0.06003	0.03923	0.02151			21.8	0.0671	0.0764	0.0688	0.0487	0.0449	0.0489	0.0449	0.0209		0.0439	0.0473	0.0487	0.0419	0.0388	0.0475	0.0423	0.0378		0.0651	0.0733	0.0668	0.0562	0.0479	0.0534	0.0471	0.0252			21.8	0.0679	0.0778	0.0692	0.056	0.0436	0.0501	0.0469	0.0207
22	0.07089	0.07106	0.06435	0.0636	0.04313	0.05838	0.04068	0.01936			22	0.0663	0.0757	0.069	0.0484	0.0444	0.0487	0.0444	0.0209		0.044	0.0466	0.0484	0.0414	0.0383	0.047	0.0419	0.0376		0.0643	0.0736	0.0664	0.056	0.0477	0.0531	0.047	0.0251			22	0.0668	0.078	0.0685	0.0546	0.0436	0.0498	0.0456	0.0218
22.2	0.06834	0.07046	0.066	0.0598	0.04088	0.05353	0.04358	0.01711			22.2	0.0652	0.0759	0.0681	0.0483	0.0447	0.0487	0.0433	0.0229		0.0438	0.0462	0.0483	0.0408	0.038	0.0466	0.0414	0.0374		0.0638	0.0729	0.066	0.0554	0.0476	0.0528	0.0468	0.0251			22.2	0.0665	0.0773	0.0683	0.0532	0.0444	0.0488	0.044	0.0231
22.4	0.06949	0.06626	0.0657	0.05925	0.04278	0.05308	0.04333	0.01441			22.4	0.0653	0.0759	0.0672	0.0474	0.0454	0.0485	0.043	0.0217		0.0435	0.046	0.0474	0.0406	0.0374	0.0463	0.041	0.037		0.0641	0.0722	0.0653	0.055	0.0474	0.0525	0.0467	0.0253			22.4	0.066	0.0764	0.0678	0.0526	0.0452	0.0479	0.0432	0.0209
22.6	0.07089	0.06746	0.06935	0.05665	0.03878	0.05078	0.04423	0.02361			22.6	0.0656	0.0752	0.0667	0.0475	0.0456	0.0477	0.0427	0.0204		0.0429	0.0451	0.0475	0.0407	0.037	0.0462	0.0408	0.0363		0.0636	0.0719	0.0646	0.0548	0.0472	0.0521	0.0466	0.0251			22.6	0.0658	0.0755	0.0664	0.053	0.0455	0.0469	0.0434	0.0204
22.8	0.06644	0.07401	0.0648	0.0571	0.04023	0.05058	0.04053	0.01746			22.8	0.0656	0.0745	0.0663	0.0474	0.0453	0.0471	0.043	0.0209		0.0432	0.045	0.0474	0.04	0.037	0.0455	0.0405	0.0358		0.0631	0.0716	0.0641	0.0547	0.0468	0.0519	0.0464	0.0252			22.8	0.0655	0.0746	0.0657	0.0536	0.0446	0.0464	0.0439	0.0212
23	0.06524	0.07656	0.0654	0.05625	0.03798	0.05318	0.04303	0.01061			23	0.0652	0.074	0.0658	0.0465	0.0442	0.047	0.0438	0.0213		0.043	0.0448	0.0465	0.0396	0.037	0.0453	0.04	0.0357		0.0628	0.0713	0.0639	0.0544	0.0465	0.0517	0.0463	0.0252			23	0.0648	0.0743	0.0654	0.0538	0.0431	0.0471	0.0438	0.0215
23.2	0.06684	0.06801	0.0666	0.05545	0.03818	0.05503	0.04333	0.01031			23.2	0.0648	0.0737	0.0651	0.0466	0.0429	0.0476	0.044	0.0216		0.0429	0.0448	0.0466	0.0397	0.0364	0.045	0.0399	0.0358		0.0621	0.0712	0.0637	0.0541	0.0462	0.0514	0.0461	0.0253			23.2	0.0645	0.0742	0.0653	0.0543	0.0415	0.0486	0.0435	0.0221
23.4	0.06749	0.06561	0.0653	0.05875	0.03633	0.05293	0.04268	0.02256			23.4	0.064	0.0737	0.0648	0.0466	0.0421	0.0481	0.0437	0.0209		0.0423	0.0446	0.0466	0.0394	0.0364	0.0446	0.0397	0.0356		0.062	0.0707	0.0634	0.0538	0.046	0.0513	0.046	0.0251			23.4	0.0639	0.0736	0.0652	0.0552	0.0408	0.05	0.0433	0.0203
23.6	0.06504	0.07021	0.06115	0.0582	0.03853	0.05563	0.04208	0.02041			23.6	0.0633	0.0738	0.0643	0.0464	0.0423	0.0481	0.0436	0.0196		0.0421	0.0443	0.0464	0.0392	0.0361	0.0447	0.0394	0.0354		0.0615	0.0706	0.0631	0.0537	0.0457	0.051	0.0457	0.025			23.6	0.0637	0.0732	0.0651	0.0548	0.0409	0.0499	0.0433	0.0186
23.8	0.06874	0.07411	0.06305	0.0586	0.04158	0.05278	0.04243	0.01661			23.8	0.0626	0.0729	0.0638	0.0463	0.0429	0.0477	0.0435	0.0197		0.0419	0.044	0.0463	0.039	0.0358	0.0443	0.0393	0.035		0.0606	0.0697	0.0627	0.0535	0.0453	0.0509	0.0453	0.0249			23.8	0.0631	0.0729	0.0643	0.0539	0.0419	0.0488	0.0434	0.0206
24	0.06689	0.06471	0.06545	0.05555	0.04188	0.05123	0.03843	0.00986			24	0.0624	0.0721	0.0635	0.0459	0.0438	0.0475	0.0435	0.0216		0.0419	0.0443	0.0459	0.0386	0.0357	0.0442	0.0388	0.0346		0.0609	0.0696	0.0625	0.0534	0.0451	0.0509	0.0448	0.0249			24	0.0625	0.0726	0.0633	0.0527	0.043	0.0475	0.0435	0.0226
24.2	0.06409	0.06531	0.06645	0.0547	0.03703	0.04948	0.04063	0.01856			24.2	0.062	0.0715	0.0632	0.0454	0.0444	0.0475	0.0433	0.0226		0.0415	0.0438	0.0454	0.0385	0.0356	0.0442	0.0388	0.0346		0.06	0.0689	0.0619	0.0535	0.0449	0.051	0.0445	0.0249			24.2	0.0621	0.072	0.0629	0.0515	0.0438	0.0464	0.0433	0.0233
24.4	0.06729	0.06831	0.06305	0.06185	0.03923	0.04773	0.04248	0.02091			24.4	0.0616	0.0712	0.0628	0.0454	0.0446	0.0475	0.0434	0.0223		0.0414	0.0434	0.0454	0.0385	0.0353	0.0437	0.0386	0.0342		0.0596	0.0685	0.0614	0.0535	0.0447	0.0512	0.0446	0.0248			24.4	0.0619	0.0708	0.0624	0.0504	0.0439	0.0462	0.0435	0.022
24.6	0.06259	0.06556	0.06345	0.05655	0.03968	0.04873	0.04198	0.01986			24.6	0.0612	0.0705	0.0624	0.0452	0.0444	0.0472	0.0438	0.0211		0.0412	0.0433	0.0452	0.0381	0.0352	0.0435	0.0384	0.0343		0.0595	0.0682	0.0607	0.0532	0.0446	0.0513	0.0448	0.0246			24.6	0.0616	0.0704	0.0619	0.0505	0.0431	0.0468	0.044	0.0201
24.8	0.06304	0.06886	0.064	0.0549	0.04048	0.05008	0.03963	0.01441			24.8	0.0611	0.0697	0.0619	0.0451	0.0437	0.0469	0.0441	0.0209		0.041	0.0435	0.0451	0.0377	0.0348	0.0433	0.038	0.0339		0.0592	0.0678	0.0606	0.0528	0.0445	0.051	0.0451	0.0248			24.8	0.0611	0.0703	0.0615	0.0507	0.042	0.0471	0.044	0.0205
25	0.06314	0.06851	0.06165	0.05555	0.04273	0.04753	0.03973	0.01156			25	0.0607	0.0695	0.0615	0.0448	0.0429	0.0466	0.0442	0.0215		0.0408	0.0432	0.0448	0.0374	0.0346	0.0428	0.0377	0.0338		0.059	0.0679	0.0606	0.0523	0.0443	0.0507	0.0453	0.0248			25	0.0602	0.0697	0.0609	0.0509	0.041	0.047	0.0436	0.0208
25.2	0.06334	0.06691	0.06295	0.0543	0.04158	0.04593	0.04303	0.01546			25.2	0.0601	0.0694	0.0608	0.0447	0.042	0.0465	0.0438	0.0215		0.0411	0.0435	0.0447	0.0374	0.0344	0.0427	0.0376	0.0335		0.0587	0.0677	0.0605	0.0517	0.0442	0.0501	0.0453	0.025			25.2	0.0601	0.0695	0.0601	0.0511	0.0404	0.0466	0.043	0.0209
25.4	0.06584	0.06811	0.0639	0.0556	0.03848	0.04703	0.03958	0.01661			25.4	0.06	0.0691	0.0601	0.0445	0.0414	0.0464	0.0431	0.0218		0.0409	0.0433	0.0445	0.0371	0.0341	0.0426	0.0372	0.0332		0.0588	0.0672	0.0603	0.0513	0.0441	0.0498	0.045	0.025			25.4	0.0596	0.0701	0.0594	0.0511	0.0401	0.0462	0.0422	0.022
25.6	0.06379	0.06956	0.06485	0.0544	0.03748	0.04748	0.03928	0.01271			25.6	0.0596	0.0691	0.0597	0.0447	0.0411	0.0464	0.0427	0.0214		0.0405	0.0426	0.0447	0.0371	0.0341	0.0427	0.0373	0.033		0.0588	0.0667	0.0599	0.0512	0.0438	0.0497	0.0448	0.0249			25.6	0.0596	0.07	0.0589	0.051	0.0404	0.046	0.0414	0.0202
25.8	0.06579	0.07061	0.06335	0.0578	0.03753	0.05143	0.04078	0.00901			25.8	0.0597	0.0691	0.0596	0.0446	0.0411	0.0464	0.0426	0.0208		0.0406	0.0427	0.0446	0.037	0.0341	0.0425	0.0372	0.0328		0.0586	0.0663	0.0594	0.0512	0.0435	0.0499	0.0446	0.0248			25.8	0.0595	0.0687	0.0591	0.0508	0.0409	0.0462	0.0418	0.0197
26	0.06299	0.07181	0.05995	0.05645	0.03908	0.04698	0.03908	0.01261			26	0.0591	0.0683	0.0599	0.044	0.0414	0.0467	0.0424	0.0212		0.0402	0.0425	0.044	0.0371	0.034	0.0426	0.0371	0.0329		0.058	0.066	0.059	0.0513	0.0432	0.0501	0.0445	0.0248			26	0.0598	0.0678	0.0596	0.0505	0.0415	0.0462	0.0424	0.0209
26.2	0.06134	0.06631	0.0583	0.0556	0.04018	0.05188	0.04173	0.02541			26.2	0.0592	0.0673	0.0599	0.044	0.0419	0.0471	0.0421	0.022		0.04	0.0423	0.044	0.0369	0.0339	0.0425	0.0371	0.0329		0.0579	0.0653	0.0588	0.051	0.0431	0.0501	0.0443	0.0247			26.2	0.0591	0.0675	0.0598	0.0503	0.0418	0.0464	0.0426	0.0213
26.4	0.06489	0.06786	0.0603	0.0546	0.03793	0.05023	0.04013	0.02116			26.4	0.0589	0.0667	0.0594	0.0438	0.0423	0.0471	0.0422	0.0222		0.0401	0.0419	0.0438	0.0364	0.0339	0.042	0.0369	0.0327		0.0577	0.0649	0.0586	0.0509	0.043	0.0498	0.0441	0.0245			26.4	0.0591	0.067	0.0594	0.0498	0.0417	0.0462	0.0428	0.0217
26.6	0.06294	0.06696	0.06205	0.0532	0.03788	0.04638	0.04148	0.01801			26.6	0.0589	0.0667	0.0587	0.0435	0.0427	0.0466	0.0425	0.0214		0.0398	0.0414	0.0435	0.0362	0.0335	0.0418	0.0365	0.0326		0.0576	0.0646	0.0584	0.0507	0.0431	0.0494	0.0439	0.0245			26.6	0.0591	0.0666	0.0587	0.049	0.0409	0.0455	0.0426	0.0211
26.8	0.06299	0.06601	0.064	0.055	0.03958	0.04783	0.03673	0.01386			26.8	0.0589	0.0665	0.0582	0.0432	0.0422	0.0457	0.0428	0.021		0.0394	0.0408	0.0432	0.0363	0.0333	0.0416	0.0363	0.0326		0.0568	0.0641	0.0583	0.0506	0.043	0.0492	0.0437	0.0247			26.8	0.059	0.0664	0.0578	0.0479	0.0399	0.0445	0.0424	0.02
27	0.06019	0.06451	0.0634	0.05575	0.03518	0.05033	0.03768	0.01056			27	0.0587	0.0657	0.0582	0.0429	0.0413	0.045	0.0426	0.0212		0.0392	0.0407	0.0429	0.036	0.0332	0.0414	0.0363	0.0322		0.057	0.0637	0.0581	0.0505	0.0428	0.049	0.0436	0.0247			27	0.0594	0.0662	0.0574	0.0471	0.0388	0.0436	0.042	0.0206
27.2	0.06329	0.06651	0.06065	0.0565	0.03548	0.04803	0.03853	0.01131			27.2	0.0587	0.0653	0.0583	0.0425	0.0403	0.0449	0.0424	0.0215		0.0391	0.04	0.0425	0.0357	0.0332	0.0413	0.0362	0.0321		0.0568	0.0629	0.0578	0.0503	0.0426	0.0488	0.0435	0.0245			27.2	0.0592	0.0656	0.0577	0.0475	0.0384	0.0436	0.0417	0.0208
27.4	0.06294	0.07146	0.059	0.05265	0.04243	0.04448	0.04033	0.02361			27.4	0.0581	0.0649	0.0584	0.0424	0.0397	0.0451	0.042	0.0213		0.0387	0.0398	0.0424	0.0355	0.0329	0.041	0.0358	0.032		0.0566	0.0627	0.0575	0.05	0.0423	0.0486	0.0436	0.0246			27.4	0.059	0.0655	0.0581	0.0482	0.0385	0.0441	0.0414	0.0213
27.6	0.06299	0.06906	0.057	0.0579	0.04318	0.04998	0.04143	0.02091			27.6	0.058	0.0646	0.0583	0.0418	0.0397	0.0453	0.0417	0.0216		0.0385	0.0402	0.0418	0.0353	0.0327	0.0406	0.0358	0.032		0.0559	0.062	0.0571	0.0497	0.0418	0.0485	0.0436	0.0245			27.6	0.0586	0.0654	0.0582	0.0489	0.0391	0.045	0.0409	0.0215
27.8	0.06239	0.06886	0.0605	0.05525	0.03993	0.04673	0.04283	0.01656			27.8	0.058	0.0644	0.0579	0.0417	0.04	0.0452	0.0416	0.0214		0.0376	0.0401	0.0417	0.0351	0.0324	0.0405	0.0355	0.0316		0.0556	0.062	0.0571	0.0492	0.0414	0.0483	0.0435	0.0244			27.8	0.0578	0.0646	0.0586	0.0496	0.0399	0.0456	0.0405	0.0199
28	0.06404	0.06856	0.06275	0.0527	0.03428	0.04978	0.03853	0.01276			28	0.0572	0.0645	0.0574	0.0419	0.0404	0.0449	0.0411	0.0214		0.0378	0.0394	0.0419	0.0347	0.032	0.04	0.0353	0.0317		0.0552	0.0618	0.0569	0.0488	0.0412	0.0481	0.0431	0.0242			28	0.0571	0.064	0.0585	0.05	0.0404	0.0457	0.0406	0.0198
28.2	0.06169	0.06641	0.06405	0.05005	0.03418	0.05063	0.03998	0.00746			28.2	0.057	0.0641	0.0573	0.0417	0.0404	0.0449	0.0408	0.0216		0.0377	0.0395	0.0417	0.0344	0.0318	0.0399	0.0351	0.0314		0.055	0.0616	0.0568	0.0486	0.041	0.0478	0.0426	0.0242			28.2	0.0566	0.0637	0.0576	0.0499	0.0405	0.0452	0.0405	0.021
28.4	0.06004	0.06286	0.06325	0.0526	0.03418	0.04833	0.03833	0.00946			28.4	0.0566	0.0635	0.0576	0.0413	0.0402	0.0448	0.0408	0.0214		0.0378	0.0392	0.0413	0.0344	0.0314	0.0398	0.0345	0.031		0.0547	0.0611	0.0566	0.0485	0.0409	0.0475	0.0422	0.0241			28.4	0.0565	0.0639	0.0568	0.0495	0.0401	0.0445	0.0406	0.0207
28.6	0.05939	0.06936	0.0601	0.05085	0.03418	0.04778	0.03708	0.01516			28.6	0.0561	0.0634	0.0571	0.0412	0.04	0.0448	0.0405	0.0214		0.0372	0.0393	0.0412	0.0344	0.0313	0.0396	0.0345	0.031		0.0543	0.0606	0.0563	0.0485	0.0408	0.0471	0.0419	0.024			28.6	0.0569	0.0637	0.0566	0.0489	0.0389	0.0435	0.0408	0.0209
28.8	0.06219	0.06751	0.05775	0.0501	0.03938	0.04938	0.03743	0.01401			28.8	0.0561	0.0633	0.0568	0.0411	0.0396	0.0443	0.0404	0.0213		0.0371	0.0395	0.0411	0.0341	0.0311	0.0394	0.0345	0.0306		0.0538	0.0605	0.0557	0.0484	0.0407	0.0469	0.0416	0.024			28.8	0.0574	0.0641	0.0567	0.048	0.0375	0.0428	0.0406	0.0202
29	0.06069	0.06206	0.05935	0.05175	0.03888	0.04838	0.03898	0.01561			29	0.0566	0.0635	0.0566	0.041	0.0391	0.044	0.0403	0.021		0.0369	0.0397	0.041	0.0338	0.0309	0.0393	0.0343	0.0304		0.0536	0.0613	0.0556	0.0482	0.0405	0.0466	0.0415	0.0239			29	0.0572	0.0645	0.057	0.0474	0.0367	0.0425	0.0401	0.0196
29.2	0.06314	0.06301	0.0613	0.05005	0.03508	0.04573	0.03853	0.01301			29.2	0.0564	0.0643	0.0567	0.0412	0.0386	0.0437	0.0399	0.0209		0.037	0.0393	0.0412	0.0335	0.0307	0.0391	0.0339	0.0303		0.0539	0.0613	0.0557	0.0478	0.0402	0.0465	0.0414	0.0236			29.2	0.0574	0.0648	0.0578	0.0469	0.0365	0.0426	0.0396	0.0203
29.4	0.06064	0.06686	0.0637	0.0537	0.03593	0.04753	0.03733	0.02181			29.4	0.0565	0.0648	0.057	0.0413	0.0384	0.0436	0.0397	0.0212		0.0371	0.0394	0.0413	0.0334	0.0304	0.039	0.0337	0.0301		0.0538	0.0612	0.0561	0.0476	0.0396	0.0464	0.0413	0.0236			29.4	0.057	0.0646	0.058	0.0469	0.0369	0.0432	0.0392	0.0207
29.6	0.06234	0.06481	0.06135	0.0565	0.03823	0.04803	0.03838	0.02346			29.6	0.0566	0.0644	0.0577	0.0408	0.0382	0.0434	0.0393	0.0215		0.0367	0.0393	0.0408	0.0334	0.0302	0.0389	0.0336	0.0299		0.054	0.0607	0.0561	0.0474	0.0393	0.0464	0.0412	0.0235			29.6	0.057	0.0646	0.0578	0.0471	0.0377	0.0438	0.0389	0.0213
29.8	0.06029	0.06621	0.0586	0.0554	0.03523	0.04328	0.03968	0.01241			29.8	0.0568	0.0637	0.0579	0.0408	0.0384	0.0435	0.0392	0.0215		0.0366	0.0393	0.0408	0.0334	0.0301	0.039	0.0334	0.0297		0.0543	0.0608	0.056	0.0474	0.0391	0.0463	0.041	0.0233			29.8	0.0569	0.0643	0.0576	0.0474	0.0383	0.0443	0.0389	0.0207
30	0.06069	0.07081	0.059	0.0541	0.03268	0.04773	0.03883	0.01116			30	0.0567	0.0638	0.0574	0.0407	0.0387	0.0438	0.0396	0.0212		0.0365	0.0389	0.0407	0.0331	0.0301	0.0388	0.0334	0.0295		0.0541	0.0607	0.0556	0.0473	0.0392	0.0463	0.0409	0.0232			30	0.0567	0.0644	0.0571	0.0472	0.0385	0.0438	0.0393	0.0195
30.2	0.05919	0.06966	0.0587	0.0551	0.03278	0.04713	0.03603	0.00761			30.2	0.0566	0.0639	0.057	0.0407	0.0389	0.0438	0.04	0.0212		0.0369	0.039	0.0407	0.0329	0.0303	0.0387	0.0334	0.0292		0.0547	0.0609	0.0556	0.0471	0.0393	0.046	0.0407	0.0234			30.2	0.0566	0.0649	0.0569	0.0473	0.0386	0.0431	0.0398	0.0202
30.4	0.06124	0.06806	0.0604	0.0514	0.03163	0.04573	0.04023	0.00826			30.4	0.0568	0.0642	0.0568	0.0404	0.0387	0.0433	0.0404	0.0213		0.0369	0.0387	0.0404	0.0329	0.0302	0.0387	0.0331	0.0295		0.0544	0.0608	0.0555	0.0468	0.0394	0.0458	0.0407	0.0236			30.4	0.0566	0.0649	0.0571	0.0475	0.0385	0.0427	0.0399	0.0206
30.6	0.06099	0.07406	0.06385	0.0449	0.03563	0.04663	0.03308	0.02626			30.6	0.0568	0.0641	0.0568	0.0405	0.0386	0.0428	0.0404	0.0215		0.0369	0.0385	0.0405	0.033	0.0303	0.0386	0.0331	0.0297		0.0543	0.0608	0.0558	0.0466	0.0394	0.0456	0.0408	0.0234			30.6	0.0569	0.0643	0.0578	0.0484	0.038	0.0428	0.04	0.0205
30.8	0.05879	0.07251	0.06285	0.0483	0.03313	0.04658	0.03628	0.02426			30.8	0.0565	0.0639	0.0574	0.0404	0.0386	0.0429	0.04	0.0214		0.0368	0.0384	0.0404	0.0331	0.0304	0.0384	0.0333	0.0295		0.0542	0.0608	0.0559	0.0463	0.0395	0.0456	0.0407	0.0234			30.8	0.057	0.0638	0.0583	0.0483	0.0377	0.0433	0.0402	0.0204
31	0.05894	0.06786	0.06245	0.0494	0.03633	0.04418	0.03548	0.01776			31	0.0563	0.0636	0.0577	0.0405	0.0387	0.0433	0.0397	0.021		0.0365	0.0386	0.0405	0.0331	0.0303	0.0387	0.0333	0.0294		0.0546	0.0607	0.056	0.0464	0.0395	0.0454	0.0407	0.0233			31	0.0572	0.0635	0.0587	0.048	0.0375	0.0431	0.0398	0.0196
31.2	0.06084	0.06436	0.061	0.0533	0.03703	0.04543	0.04013	0.01721			31.2	0.0566	0.0635	0.0578	0.0403	0.0388	0.0436	0.0395	0.0211		0.0367	0.0384	0.0403	0.0329	0.0304	0.0385	0.0333	0.0295		0.0545	0.0609	0.0558	0.0467	0.0395	0.0453	0.0406	0.0233			31.2	0.0575	0.0633	0.0592	0.0473	0.0378	0.0428	0.0393	0.0195
31.4	0.05644	0.05711	0.05775	0.05125	0.03813	0.04293	0.03643	0.01606			31.4	0.0571	0.0635	0.0578	0.0402	0.0391	0.0434	0.0396	0.0213		0.0373	0.0384	0.0402	0.0327	0.0306	0.0383	0.0331	0.0294		0.0548	0.0608	0.0557	0.0467	0.0394	0.0453	0.0406	0.0233			31.4	0.0576	0.0628	0.0592	0.0466	0.0378	0.0422	0.0387	0.0205
31.6	0.06264	0.05946	0.0581	0.05115	0.03368	0.04613	0.03673	0.01496			31.6	0.0572	0.0627	0.0583	0.0401	0.0391	0.0429	0.0395	0.0217		0.0372	0.0379	0.0401	0.0328	0.0304	0.0383	0.033	0.0295		0.0548	0.0601	0.0559	0.0469	0.0392	0.0453	0.0405	0.0234			31.6	0.0582	0.0624	0.0593	0.046	0.0381	0.0418	0.0385	0.0208
31.8	0.06129	0.06341	0.0591	0.04875	0.03538	0.04543	0.03718	0.01491			31.8	0.057	0.0619	0.0585	0.0401	0.0389	0.0427	0.0393	0.0217		0.0367	0.0379	0.0401	0.0331	0.0303	0.0383	0.0332	0.0296		0.0545	0.0598	0.0561	0.0468	0.0391	0.0454	0.0404	0.0233			31.8	0.0578	0.0627	0.0592	0.0459	0.0382	0.0417	0.0384	0.0209
32	0.05809	0.06101	0.06125	0.04785	0.03333	0.04638	0.03648	0.01416			32	0.0565	0.0619	0.0585	0.04	0.0386	0.0427	0.0391	0.0213		0.0363	0.0377	0.04	0.0331	0.0303	0.0383	0.0332	0.0294		0.054	0.0592	0.0561	0.0467	0.039	0.0454	0.0403	0.0232			32	0.0572	0.0625	0.0589	0.046	0.0381	0.0418	0.0386	0.0201
32.2	0.06084	0.06261	0.06205	0.04615	0.03778	0.04298	0.03503	0.00961			32.2	0.056	0.0618	0.0584	0.0399	0.0383	0.0428	0.039	0.021		0.0361	0.0373	0.0399	0.0329	0.0303	0.0384	0.0331	0.0293		0.0535	0.0588	0.0561	0.0467	0.039	0.0453	0.0402	0.0232			32.2	0.0571	0.0618	0.0585	0.0463	0.0377	0.042	0.0387	0.0195
32.4	0.05939	0.06466	0.05905	0.0488	0.03513	0.04193	0.03713	0.01246			32.4	0.0559	0.0609	0.0583	0.0395	0.038	0.0424	0.039	0.0211		0.0357	0.0376	0.0395	0.0325	0.0303	0.0379	0.033	0.0292		0.0529	0.0583	0.0556	0.0465	0.0389	0.0451	0.0401	0.0233			32.4	0.0566	0.0606	0.0579	0.0468	0.0372	0.0425	0.0386	0.0201
32.6	0.05629	0.05971	0.05825	0.04965	0.03783	0.03873	0.03878	0.01946			32.6	0.0556	0.0602	0.0576	0.0392	0.0376	0.0421	0.039	0.0215		0.0353	0.0367	0.0392	0.0323	0.0299	0.0379	0.0328	0.0293		0.0526	0.0577	0.0552	0.0461	0.0387	0.0448	0.0399	0.0232			32.6	0.0559	0.0599	0.0572	0.0472	0.0366	0.0427	0.0383	0.0208
32.8	0.05954	0.05881	0.0581	0.05185	0.03383	0.03753	0.03728	0.01731			32.8	0.0551	0.06	0.0571	0.0389	0.0373	0.042	0.0388	0.0216		0.035	0.0366	0.0389	0.0321	0.0296	0.0376	0.0326	0.0291		0.0526	0.0578	0.0549	0.0456	0.0384	0.0446	0.0397	0.0232			32.8	0.0555	0.0598	0.0567	0.0467	0.0361	0.0426	0.0384	0.0214
33	0.05949	0.06081	0.05775	0.0469	0.03518	0.04623	0.03553	0.01386			33	0.0549	0.0599	0.0569	0.0384	0.037	0.0421	0.0384	0.0211		0.0348	0.0361	0.0384	0.0318	0.0295	0.0373	0.0324	0.0291		0.052	0.057	0.0546	0.0453	0.0381	0.0441	0.0395	0.0231			33	0.0545	0.0596	0.0567	0.0459	0.036	0.0422	0.038	0.0202
33.2	0.05784	0.06086	0.06155	0.0436	0.03723	0.04908	0.03418	0.01136			33.2	0.0547	0.0594	0.0567	0.0382	0.0369	0.042	0.038	0.0205		0.0346	0.0361	0.0382	0.0317	0.0292	0.037	0.0322	0.0288		0.0521	0.057	0.0546	0.045	0.0379	0.0438	0.0392	0.023			33.2	0.0544	0.0593	0.0565	0.0453	0.0362	0.0416	0.0378	0.0189
33.4	0.05749	0.05826	0.0614	0.04975	0.03063	0.04433	0.03273	0.01271			33.4	0.0546	0.0591	0.0562	0.0379	0.037	0.0416	0.0378	0.0206		0.0345	0.0357	0.0379	0.0313	0.0289	0.0365	0.0319	0.0286		0.0519	0.0568	0.0542	0.0448	0.0377	0.0436	0.039	0.023			33.4	0.0542	0.0592	0.0563	0.0451	0.0364	0.0409	0.0375	0.0196
33.6	0.05869	0.05941	0.0599	0.0507	0.03303	0.04558	0.03343	0.01451			33.6	0.054	0.0591	0.0559	0.0381	0.0371	0.0411	0.0378	0.021		0.0345	0.0357	0.0381	0.0311	0.0287	0.0365	0.0317	0.0285		0.0515	0.0568	0.0542	0.0449	0.0375	0.0434	0.0389	0.0228			33.6	0.0534	0.0593	0.0561	0.0452	0.0364	0.0407	0.037	0.0207
33.8	0.05789	0.06196	0.0562	0.05495	0.03573	0.04623	0.03643	0.01201			33.8	0.0534	0.0589	0.0558	0.0379	0.0371	0.0409	0.0379	0.021		0.0344	0.0358	0.0379	0.0309	0.0284	0.0361	0.0313	0.0284		0.0512	0.0566	0.054	0.0447	0.0374	0.0435	0.0388	0.0228			33.8	0.0535	0.0593	0.0559	0.0454	0.0361	0.041	0.0372	0.0205
34	0.05869	0.06201	0.05495	0.053	0.03348	0.05058	0.03898	0.01141			34	0.0532	0.0592	0.0558	0.0378	0.0368	0.0408	0.038	0.0207		0.0339	0.0358	0.0378	0.031	0.0281	0.0362	0.0313	0.0282		0.0511	0.0567	0.054	0.0448	0.0371	0.0433	0.0387	0.0225			34	0.0535	0.0594	0.0555	0.0456	0.0355	0.041	0.0371	0.0203
34.2	0.05759	0.06296	0.05585	0.04575	0.03193	0.04323	0.03298	0.00926			34.2	0.0531	0.0591	0.0556	0.038	0.0363	0.0408	0.0378	0.0201		0.0339	0.0361	0.038	0.0308	0.0279	0.0362	0.0312	0.0278		0.0508	0.0566	0.0539	0.0445	0.0369	0.0433	0.0385	0.0225			34.2	0.0532	0.0594	0.0553	0.0454	0.035	0.0413	0.0369	0.0191
34.4	0.05779	0.06546	0.05825	0.0451	0.03473	0.04303	0.03703	0.00816			34.4	0.0529	0.0592	0.0556	0.0379	0.0359	0.0409	0.0377	0.02		0.0338	0.0358	0.0379	0.0306	0.0278	0.0362	0.0311	0.0277		0.0507	0.0565	0.0538	0.0443	0.0367	0.0432	0.0383	0.0224			34.4	0.0535	0.0593	0.0552	0.0449	0.0345	0.0411	0.0371	0.0183
34.6	0.05919	0.06406	0.0602	0.0392	0.02983	0.04383	0.03423	0.01901			34.6	0.0528	0.0591	0.0553	0.0379	0.0356	0.041	0.0378	0.0203		0.0339	0.0362	0.0379	0.0304	0.0276	0.036	0.0308	0.0274		0.0506	0.0561	0.0535	0.0442	0.0365	0.0431	0.0381	0.0223			34.6	0.0532	0.059	0.0552	0.0447	0.0343	0.0408	0.0369	0.0194
34.8	0.05539	0.06166	0.06055	0.04535	0.02943	0.04098	0.03433	0.01596			34.8	0.0533	0.0584	0.0554	0.0377	0.0355	0.0409	0.0376	0.0205		0.0335	0.0361	0.0377	0.0304	0.0275	0.0359	0.0307	0.0275		0.0505	0.0562	0.0532	0.0441	0.0364	0.0428	0.0379	0.0223			34.8	0.0531	0.0587	0.0551	0.0446	0.0347	0.0403	0.0367	0.0201
35	0.05629	0.06231	0.0587	0.0472	0.04018	0.04173	0.03213	0.01416			35	0.0533	0.0584	0.0552	0.0379	0.0357	0.0407	0.0372	0.0206		0.0334	0.0356	0.0379	0.0304	0.0274	0.0361	0.0307	0.0273		0.0508	0.0557	0.053	0.0439	0.0363	0.0426	0.0378	0.022			35	0.0532	0.0586	0.0549	0.0447	0.0351	0.0399	0.0369	0.0202
35.2	0.05574	0.06156	0.056	0.0483	0.03688	0.04508	0.03708	0.01181			35.2	0.053	0.0581	0.0547	0.0377	0.036	0.0403	0.0369	0.0205		0.0335	0.0354	0.0377	0.0303	0.0274	0.0359	0.0306	0.0272		0.0511	0.0557	0.053	0.0437	0.0363	0.0424	0.0377	0.0221			35.2	0.0531	0.0586	0.0544	0.0447	0.0354	0.0396	0.0368	0.0199
35.4	0.05394	0.06031	0.05325	0.05325	0.03668	0.04513	0.03883	0.00906			35.4	0.0531	0.058	0.0544	0.0374	0.0362	0.04	0.0368	0.0201		0.0331	0.0354	0.0374	0.0303	0.0273	0.036	0.0307	0.0271		0.0508	0.0556	0.0527	0.0435	0.0362	0.0422	0.0377	0.0221			35.4	0.0528	0.0581	0.0543	0.0445	0.0355	0.0396	0.0367	0.0184
35.6	0.05269	0.06021	0.05245	0.0504	0.03338	0.04743	0.03358	0.00841			35.6	0.053	0.0578	0.0539	0.0373	0.0361	0.0399	0.037	0.02		0.0332	0.0355	0.0373	0.0301	0.0273	0.0357	0.0305	0.027		0.0509	0.0555	0.0528	0.0435	0.0361	0.0422	0.0376	0.022			35.6	0.0531	0.0578	0.0541	0.0444	0.0353	0.0395	0.0365	0.0185
35.8	0.05499	0.05776	0.0578	0.0475	0.03283	0.04673	0.03438	0.01136			35.8	0.0532	0.0577	0.0539	0.0372	0.0359	0.0398	0.0372	0.02		0.0332	0.0349	0.0372	0.0298	0.0274	0.0354	0.0304	0.0271		0.0509	0.0551	0.0528	0.0434	0.036	0.0422	0.0376	0.0219			35.8	0.0531	0.0575	0.0538	0.0444	0.0352	0.0396	0.0361	0.0195
36	0.05424	0.05836	0.06235	0.04125	0.03028	0.04493	0.03118	0.01271			36	0.0528	0.057	0.054	0.0371	0.0356	0.0399	0.0371	0.0203		0.0335	0.0347	0.0371	0.0297	0.0273	0.0352	0.0302	0.0269		0.0509	0.0548	0.0527	0.0435	0.036	0.0421	0.0375	0.0218			36	0.053	0.0572	0.0541	0.0442	0.035	0.0396	0.0362	0.0196
36.2	0.05639	0.05996	0.0619	0.04245	0.02933	0.04213	0.03298	0.01201			36.2	0.0528	0.0568	0.0541	0.0368	0.0353	0.0399	0.0369	0.0204		0.0333	0.0345	0.0368	0.0296	0.0272	0.0352	0.0301	0.0271		0.0504	0.0545	0.0525	0.0437	0.036	0.0422	0.0374	0.022			36.2	0.053	0.0568	0.0542	0.044	0.035	0.0395	0.0363	0.0199
36.4	0.05639	0.05716	0.05645	0.04335	0.03388	0.04038	0.03208	0.01096			36.4	0.0525	0.0564	0.0537	0.0367	0.0353	0.04	0.0365	0.0202		0.0332	0.0342	0.0367	0.0298	0.0273	0.0352	0.0301	0.0269		0.0502	0.0544	0.0522	0.0438	0.0361	0.0421	0.0374	0.022			36.4	0.0529	0.0562	0.0541	0.0439	0.0348	0.0393	0.0361	0.0195
36.6	0.05454	0.05821	0.0542	0.0417	0.03768	0.03943	0.03483	0.00936			36.6	0.0525	0.0561	0.0537	0.0366	0.0354	0.0399	0.0363	0.0198		0.033	0.0343	0.0366	0.0297	0.0273	0.035	0.0301	0.0268		0.05	0.0538	0.052	0.0439	0.0361	0.0419	0.0373	0.0219			36.6	0.0524	0.0562	0.0541	0.0437	0.0346	0.0391	0.0361	0.0185
36.8	0.05514	0.06226	0.05205	0.0453	0.04013	0.03923	0.02898	0.01001			36.8	0.052	0.0562	0.0536	0.0364	0.0356	0.0397	0.0362	0.0198		0.0328	0.0343	0.0364	0.0296	0.0273	0.035	0.0302	0.0267		0.0498	0.0537	0.052	0.0439	0.0361	0.0417	0.0372	0.022			36.8	0.052	0.0563	0.0536	0.0438	0.0342	0.039	0.036	0.019
37	0.05299	0.06066	0.05385	0.04555	0.03893	0.04408	0.03513	0.01616			37	0.0516	0.0559	0.0537	0.0365	0.0355	0.0395	0.0362	0.0202		0.0327	0.0338	0.0365	0.0295	0.0271	0.0349	0.03	0.0268		0.0492	0.0533	0.0518	0.0437	0.036	0.0415	0.037	0.0221			37	0.0517	0.0565	0.0535	0.044	0.0339	0.0389	0.0359	0.0196
37.2	0.05514	0.05941	0.0544	0.04455	0.02963	0.04338	0.03658	0.01411			37.2	0.0514	0.0559	0.0539	0.0365	0.0353	0.0394	0.0361	0.0204		0.033	0.0342	0.0365	0.0294	0.027	0.0348	0.03	0.0269		0.0492	0.0535	0.0519	0.0438	0.0358	0.0414	0.0369	0.022			37.2	0.0513	0.0566	0.0535	0.0441	0.0336	0.039	0.036	0.0199
37.4	0.05389	0.05621	0.0565	0.05015	0.03318	0.04563	0.03578	0.01136			37.4	0.0506	0.056	0.0536	0.0362	0.0349	0.0395	0.0359	0.0205		0.0327	0.0342	0.0362	0.0293	0.0269	0.0346	0.0299	0.0267		0.0487	0.0535	0.0517	0.0436	0.0355	0.0414	0.0367	0.0219			37.4	0.0513	0.0563	0.0533	0.0442	0.0333	0.0391	0.0358	0.0202
37.6	0.05264	0.05581	0.0569	0.0482	0.03053	0.04438	0.03398	0.00881			37.6	0.0503	0.0556	0.0535	0.0363	0.0345	0.0395	0.0357	0.0197		0.0326	0.034	0.0363	0.0293	0.0267	0.0347	0.0297	0.0267		0.0486	0.053	0.0515	0.0436	0.0352	0.0415	0.0365	0.0217			37.6	0.0507	0.0558	0.0533	0.0443	0.0331	0.0393	0.0352	0.0191
37.8	0.05324	0.05841	0.0552	0.04585	0.03163	0.03973	0.03353	0.01061			37.8	0.0501	0.0551	0.0532	0.0362	0.0341	0.0396	0.0355	0.0193		0.0324	0.0342	0.0362	0.0292	0.0266	0.0344	0.0296	0.0266		0.0483	0.0532	0.0513	0.0435	0.0349	0.0414	0.0363	0.0218			37.8	0.0504	0.0554	0.053	0.0443	0.033	0.0393	0.0347	0.0178
38	0.05459	0.06056	0.0551	0.03885	0.03138	0.03943	0.03273	0.01031			38	0.0498	0.0552	0.0529	0.036	0.0337	0.0395	0.0353	0.0195		0.0323	0.0343	0.036	0.029	0.0265	0.0344	0.0295	0.0264		0.0478	0.0532	0.0509	0.0434	0.0347	0.0413	0.0361	0.0217			38	0.05	0.0552	0.0527	0.0444	0.0329	0.0392	0.0343	0.0186
38.2	0.05464	0.05766	0.0474	0.04325	0.03253	0.03873	0.03083	0.01721			38.2	0.0495	0.0554	0.0526	0.036	0.0334	0.0394	0.0349	0.0199		0.0319	0.0341	0.036	0.0289	0.0263	0.0343	0.0292	0.0262		0.0479	0.0528	0.0511	0.0431	0.0344	0.0412	0.0359	0.0216			38.2	0.0501	0.0549	0.0526	0.0438	0.0328	0.0387	0.0341	0.0193
38.4	0.05509	0.05761	0.04795	0.04425	0.03283	0.04013	0.02953	0.01671			38.4	0.0498	0.0551	0.0525	0.0361	0.0333	0.0392	0.0347	0.0203		0.0324	0.0337	0.0361	0.0287	0.0263	0.0343	0.0293	0.0263		0.0476	0.0526	0.0509	0.0429	0.0342	0.0411	0.0357	0.0214			38.4	0.0497	0.0548	0.0527	0.0433	0.0327	0.0383	0.0341	0.0194
38.6	0.05259	0.05896	0.05305	0.03845	0.03343	0.04008	0.03128	0.01406			38.6	0.0495	0.0548	0.0524	0.0359	0.0331	0.0388	0.0344	0.0196		0.0322	0.0336	0.0359	0.0286	0.0261	0.034	0.0292	0.026		0.0474	0.0524	0.0507	0.0427	0.034	0.0409	0.0355	0.0214			38.6	0.0493	0.0548	0.0521	0.0427	0.0325	0.0379	0.0342	0.0194
38.8	0.05104	0.05536	0.05635	0.04335	0.02248	0.04188	0.03273	0.01081			38.8	0.0493	0.0546	0.0523	0.0357	0.0329	0.0386	0.0342	0.019		0.0318	0.0334	0.0357	0.0286	0.0259	0.0342	0.029	0.0259		0.0472	0.0523	0.0505	0.0424	0.0339	0.0407	0.0354	0.0212			38.8	0.0491	0.0549	0.052	0.0422	0.0322	0.0378	0.034	0.0183
39	0.05384	0.05586	0.05965	0.0471	0.02468	0.03828	0.03483	0.01076			39	0.0492	0.0545	0.0521	0.0356	0.0328	0.0384	0.0342	0.019		0.0315	0.0333	0.0356	0.0286	0.0258	0.034	0.0289	0.0258		0.0469	0.0522	0.0501	0.0421	0.0338	0.0404	0.0354	0.0211			39	0.049	0.0545	0.052	0.0418	0.0321	0.038	0.0336	0.0177
39.2	0.05314	0.05601	0.0566	0.055	0.02548	0.03953	0.03338	0.01131			39.2	0.049	0.0542	0.0519	0.0355	0.0328	0.0383	0.0343	0.0192		0.0315	0.0327	0.0355	0.0283	0.0259	0.0339	0.0289	0.0257		0.0469	0.0517	0.05	0.0418	0.0338	0.0401	0.0352	0.0211			39.2	0.0492	0.0543	0.052	0.0419	0.0322	0.0381	0.0335	0.0182
39.4	0.05264	0.05376	0.05305	0.04695	0.02458	0.04083	0.02838	0.01211			39.4	0.0488	0.0539	0.0517	0.0353	0.033	0.0382	0.0343	0.0194		0.0313	0.0328	0.0353	0.0281	0.0258	0.0337	0.0287	0.0255		0.0468	0.0515	0.0498	0.0415	0.0337	0.0399	0.0352	0.021			39.4	0.0491	0.0539	0.0515	0.0421	0.0323	0.0382	0.0338	0.019
39.6	0.04919	0.05741	0.0511	0.0414	0.02783	0.04243	0.02928	0.01211			39.6	0.0488	0.0536	0.0513	0.0348	0.0332	0.0381	0.0343	0.0196		0.0311	0.0327	0.0348	0.028	0.0257	0.0336	0.0285	0.0257		0.0466	0.0513	0.0497	0.0412	0.0337	0.0398	0.0352	0.0209			39.6	0.0492	0.0536	0.0513	0.0421	0.0324	0.0382	0.034	0.0191
39.8	0.05139	0.05711	0.04925	0.0439	0.02928	0.03863	0.03238	0.00931			39.8	0.0488	0.0535	0.0511	0.0348	0.0334	0.0379	0.0343	0.0192		0.0312	0.0323	0.0348	0.028	0.0256	0.0334	0.0285	0.0257		0.0466	0.0511	0.0496	0.041	0.0335	0.0397	0.0352	0.0209			39.8	0.0491	0.0534	0.051	0.0419	0.0325	0.038	0.0341	0.0191
40	0.05084	0.05451	0.05135	0.0416	0.03228	0.04173	0.03143	0.00981			40	0.0484	0.0533	0.051	0.0347	0.0334	0.0378	0.0342	0.0188		0.031	0.0323	0.0347	0.0278	0.0255	0.0332	0.0286	0.0256		0.0467	0.0508	0.0495	0.0408	0.0334	0.0395	0.0351	0.0209			40	0.0489	0.0533	0.0509	0.0416	0.0326	0.0375	0.0341	0.0184
40.2	0.04924	0.05616	0.05395	0.0419	0.03098	0.03753	0.03103	0.01376			40.2	0.0486	0.0533	0.051	0.0346	0.0333	0.0376	0.0343	0.0188		0.0312	0.0321	0.0346	0.0277	0.0254	0.0331	0.0284	0.0254		0.0465	0.0506	0.0494	0.0407	0.0333	0.0393	0.0349	0.0208			40.2	0.0486	0.0533	0.0509	0.0413	0.0326	0.037	0.0341	0.0177
40.4	0.05214	0.05481	0.05675	0.044	0.03183	0.03878	0.03193	0.01396			40.4	0.0486	0.0528	0.051	0.0346	0.0332	0.0375	0.0345	0.0192		0.0308	0.0321	0.0346	0.0277	0.0252	0.0331	0.0282	0.0255		0.0464	0.0505	0.0492	0.0406	0.0332	0.0392	0.0348	0.0209			40.4	0.0484	0.0533	0.0509	0.0413	0.0323	0.0366	0.0344	0.0183
40.6	0.04819	0.05431	0.0562	0.04355	0.03003	0.03918	0.03228	0.01481			40.6	0.0483	0.0526	0.051	0.0345	0.033	0.0372	0.0346	0.0193		0.0307	0.0321	0.0345	0.0277	0.0251	0.033	0.0282	0.0253		0.0462	0.0503	0.049	0.0405	0.0331	0.0391	0.0347	0.0208			40.6	0.0482	0.0527	0.0509	0.0415	0.032	0.0367	0.0346	0.0186
40.8	0.04769	0.05531	0.0521	0.04265	0.02873	0.03783	0.02978	0.01001			40.8	0.048	0.052	0.0507	0.0345	0.0327	0.0371	0.0346	0.0193		0.0308	0.032	0.0345	0.0275	0.0252	0.033	0.0282	0.0251		0.0459	0.0498	0.049	0.0404	0.033	0.0389	0.0346	0.0207			40.8	0.0479	0.052	0.0508	0.0415	0.0317	0.0368	0.0345	0.0188
41	0.04974	0.05426	0.05115	0.0411	0.02733	0.03723	0.02953	0.00726			41	0.0477	0.0517	0.0506	0.0344	0.0325	0.0371	0.0345	0.0189		0.0306	0.0317	0.0344	0.0275	0.025	0.0329	0.0281	0.0252		0.0456	0.0496	0.0488	0.0402	0.0329	0.0387	0.0345	0.0206			41	0.0478	0.0518	0.0506	0.0414	0.0315	0.0368	0.0341	0.019
41.2	0.04819	0.05396	0.049	0.0409	0.03198	0.03843	0.03073	0.00751			41.2	0.0473	0.0518	0.0503	0.0342	0.0323	0.037	0.034	0.0187		0.0303	0.0319	0.0342	0.0275	0.025	0.0328	0.028	0.0252		0.0453	0.0493	0.0486	0.04	0.0327	0.0385	0.0343	0.0206			41.2	0.0472	0.0516	0.0502	0.0411	0.0313	0.0366	0.0334	0.0182
41.4	0.05029	0.05276	0.04935	0.0388	0.02698	0.03703	0.03208	0.01116			41.4	0.0468	0.0516	0.0504	0.034	0.0321	0.037	0.0338	0.0188		0.03	0.0313	0.034	0.0274	0.0248	0.0327	0.0279	0.025		0.0451	0.0489	0.0484	0.0399	0.0325	0.0384	0.0341	0.0205			41.4	0.047	0.051	0.05	0.041	0.0312	0.0365	0.0329	0.0176
41.6	0.04959	0.05296	0.05065	0.0386	0.02923	0.03738	0.02848	0.01136			41.6	0.0467	0.0513	0.0502	0.0341	0.0318	0.0369	0.0336	0.0189		0.0301	0.0312	0.0341	0.0272	0.0247	0.0326	0.0279	0.0249		0.0446	0.0486	0.0482	0.0397	0.0323	0.0382	0.0339	0.0205			41.6	0.0469	0.0505	0.0498	0.0407	0.031	0.0361	0.0326	0.018
41.8	0.04749	0.05171	0.05215	0.03705	0.02728	0.03913	0.02818	0.00976			41.8	0.0465	0.0507	0.0501	0.0336	0.0316	0.0367	0.0332	0.0193		0.0297	0.0307	0.0336	0.0269	0.0246	0.0323	0.0277	0.0249		0.0446	0.0484	0.0479	0.0395	0.0321	0.038	0.0337	0.0204			41.8	0.0465	0.0505	0.0498	0.0403	0.0308	0.036	0.0323	0.0187
42	0.04894	0.05311	0.05355	0.041	0.02618	0.03608	0.02908	0.00941			42	0.0461	0.0502	0.0498	0.0335	0.0316	0.0366	0.0328	0.0193		0.0293	0.0306	0.0335	0.0268	0.0243	0.0323	0.0275	0.0247		0.0442	0.0479	0.0477	0.0393	0.0318	0.0378	0.0334	0.0203			42	0.046	0.0503	0.0496	0.0399	0.0307	0.0359	0.0323	0.0188
42.2	0.04619	0.05396	0.05175	0.04185	0.03158	0.03663	0.03038	0.00876			42.2	0.0458	0.0496	0.0495	0.0332	0.0315	0.0364	0.0325	0.0188		0.0291	0.0302	0.0332	0.0266	0.0241	0.032	0.0272	0.0246		0.0439	0.0475	0.0475	0.0391	0.0316	0.0377	0.0333	0.0202			42.2	0.0457	0.0496	0.0492	0.0398	0.0304	0.0358	0.0321	0.0189
42.4	0.04959	0.05606	0.0507	0.04045	0.02878	0.03888	0.03053	0.00996			42.4	0.0456	0.049	0.0491	0.0329	0.0314	0.0361	0.0323	0.0185		0.0288	0.0295	0.0329	0.0263	0.024	0.0318	0.0272	0.0244		0.0437	0.047	0.0472	0.039	0.0314	0.0375	0.0331	0.0201			42.4	0.0456	0.049	0.0489	0.0397	0.0302	0.0358	0.0316	0.0179
42.6	0.04819	0.05531	0.05005	0.0381	0.02698	0.03883	0.03068	0.00851			42.6	0.0451	0.0485	0.0486	0.0325	0.0311	0.0358	0.0321	0.0185		0.0286	0.0295	0.0325	0.0261	0.0238	0.0315	0.0269	0.0242		0.0433	0.0465	0.0468	0.0388	0.0312	0.0374	0.0329	0.02			42.6	0.0451	0.0487	0.0484	0.0398	0.0298	0.0357	0.0313	0.0169
42.8	0.04599	0.05246	0.0485	0.03855	0.02783	0.03848	0.03108	0.00956			42.8	0.0445	0.0481	0.0483	0.0321	0.0308	0.0355	0.0321	0.0187		0.0282	0.029	0.0321	0.0259	0.0236	0.0312	0.0268	0.0242		0.0428	0.0459	0.0465	0.0386	0.031	0.0372	0.0328	0.02			42.8	0.0448	0.0483	0.048	0.0395	0.0294	0.0353	0.0314	0.0172
43	0.04864	0.05051	0.0484	0.0369	0.02498	0.03823	0.02843	0.00856			43	0.0442	0.0479	0.048	0.0319	0.0304	0.0353	0.0321	0.0188		0.0277	0.0288	0.0319	0.0257	0.0234	0.031	0.0265	0.024		0.0424	0.0458	0.0462	0.0383	0.0308	0.037	0.0326	0.0199			43	0.0444	0.0481	0.0479	0.039	0.0291	0.0352	0.0313	0.0179
43.2	0.04649	0.05156	0.05035	0.03665	0.02758	0.03773	0.02968	0.00916			43.2	0.0438	0.0479	0.0477	0.0316	0.0299	0.0351	0.0319	0.0185		0.0275	0.0287	0.0316	0.0254	0.0232	0.0307	0.0263	0.0239		0.042	0.0454	0.046	0.0381	0.0306	0.0367	0.0325	0.0199			43.2	0.0439	0.0478	0.0478	0.0386	0.0288	0.0352	0.0314	0.0185
43.4	0.04749	0.05216	0.05365	0.036	0.02453	0.03543	0.02988	0.01016			43.4	0.0435	0.0476	0.0476	0.0314	0.0296	0.0351	0.0316	0.0183		0.0274	0.0283	0.0314	0.0251	0.0229	0.0305	0.0261	0.0238		0.0417	0.0453	0.0457	0.0377	0.0304	0.0364	0.0322	0.0198			43.4	0.0436	0.0475	0.0478	0.0383	0.0288	0.0349	0.0313	0.0183
43.6	0.04729	0.05231	0.0527	0.03435	0.02638	0.03433	0.02868	0.01291			43.6	0.0434	0.0474	0.0473	0.0313	0.0295	0.035	0.0313	0.018		0.0274	0.0283	0.0313	0.0249	0.0226	0.0302	0.0259	0.0236		0.0414	0.045	0.0455	0.0374	0.0301	0.0361	0.032	0.0197			43.6	0.0435	0.0471	0.0475	0.0381	0.0289	0.0344	0.0308	0.0176
43.8	0.04729	0.05266	0.0528	0.03725	0.02298	0.03433	0.02828	0.01031			43.8	0.0433	0.047	0.0471	0.031	0.0295	0.0348	0.0311	0.0183		0.027	0.0284	0.031	0.0247	0.0224	0.03	0.0257	0.0234		0.0413	0.0448	0.0453	0.0371	0.0298	0.0358	0.0318	0.0196			43.8	0.043	0.0469	0.0471	0.0379	0.029	0.034	0.0305	0.0169
44	0.04649	0.05086	0.0493	0.03915	0.02158	0.03593	0.02783	0.00956			44	0.043	0.0468	0.0469	0.031	0.0295	0.0346	0.031	0.0184		0.0268	0.0282	0.031	0.0246	0.0222	0.0299	0.0255	0.0232		0.0411	0.0446	0.0451	0.0369	0.0296	0.0356	0.0315	0.0195			44	0.0428	0.0467	0.0467	0.0378	0.0289	0.0338	0.0305	0.0171
44.2	0.04674	0.05146	0.04805	0.03755	0.02343	0.03593	0.02998	0.00706			44.2	0.0428	0.0467	0.0467	0.031	0.0295	0.0343	0.0309	0.0185		0.0268	0.0281	0.031	0.0244	0.0219	0.0298	0.0254	0.0231		0.0409	0.0445	0.0448	0.0367	0.0293	0.0355	0.0313	0.0194			44.2	0.0427	0.0468	0.0464	0.0379	0.0287	0.0337	0.0305	0.0177
44.4	0.04719	0.05261	0.04565	0.03615	0.02563	0.03548	0.03133	0.00961			44.4	0.0427	0.0466	0.0467	0.0309	0.0294	0.034	0.0308	0.0182		0.0268	0.0281	0.0309	0.0243	0.0218	0.0296	0.0252	0.023		0.0409	0.0443	0.0447	0.0366	0.0291	0.0353	0.0311	0.0193			44.4	0.0425	0.0467	0.0462	0.0377	0.0283	0.0336	0.0304	0.0178
44.6	0.04729	0.05216	0.04615	0.0371	0.02828	0.03678	0.02868	0.00986			44.6	0.0424	0.0464	0.0465	0.0307	0.0291	0.0338	0.0307	0.018		0.0266	0.0281	0.0307	0.0242	0.0217	0.0295	0.025	0.0227		0.0406	0.0441	0.0445	0.0365	0.0289	0.0353	0.0309	0.0192			44.6	0.0425	0.0465	0.0464	0.0375	0.028	0.0335	0.0302	0.0177
44.8	0.04609	0.04986	0.04985	0.0359	0.02888	0.03453	0.02768	0.01051			44.8	0.042	0.0463	0.0464	0.0307	0.0288	0.0336	0.0306	0.0181		0.0266	0.0281	0.0307	0.0241	0.0215	0.0295	0.0248	0.0226		0.0404	0.0439	0.0445	0.0364	0.0287	0.0351	0.0308	0.0191			44.8	0.0424	0.0462	0.0463	0.0373	0.0276	0.0334	0.0299	0.0174
45	0.04699	0.04971	0.05325	0.0371	0.02798	0.03543	0.02808	0.01136			45	0.0419	0.0461	0.0462	0.0307	0.0284	0.0335	0.0305	0.0177		0.0267	0.028	0.0307	0.0239	0.0214	0.0293	0.0248	0.0225		0.0403	0.0439	0.0444	0.0362	0.0285	0.035	0.0306	0.019			45	0.0422	0.0458	0.0462	0.0372	0.0274	0.0332	0.0295	0.0167
45.2	0.04599	0.05076	0.0523	0.0377	0.02728	0.03353	0.02513	0.00841			45.2	0.042	0.0461	0.0461	0.0306	0.0281	0.0336	0.0303	0.0177		0.0266	0.0278	0.0306	0.0238	0.0213	0.0293	0.0247	0.0223		0.0399	0.0437	0.0442	0.036	0.0283	0.0349	0.0304	0.019			45.2	0.0419	0.0459	0.0461	0.0371	0.0272	0.0333	0.0294	0.0166
45.4	0.04659	0.05291	0.0505	0.0341	0.02363	0.03453	0.02718	0.00736			45.4	0.0418	0.0459	0.046	0.0305	0.0279	0.0336	0.0302	0.0179		0.0264	0.0277	0.0305	0.0237	0.0211	0.0291	0.0245	0.0222		0.0398	0.0437	0.0441	0.0358	0.0282	0.0347	0.0303	0.0188			45.4	0.0417	0.0459	0.046	0.0371	0.0271	0.0333	0.0293	0.017
45.6	0.04589	0.05141	0.0507	0.03605	0.02418	0.03353	0.02683	0.00771			45.6	0.0418	0.0457	0.0461	0.0304	0.0278	0.0335	0.0299	0.0179		0.0262	0.0277	0.0304	0.0235	0.021	0.0289	0.0244	0.0221		0.0399	0.0436	0.0439	0.0355	0.0281	0.0345	0.0301	0.0188			45.6	0.0417	0.0459	0.0459	0.0369	0.027	0.0332	0.0293	0.0175
45.8	0.04404	0.05271	0.0466	0.0353	0.02283	0.03348	0.02963	0.00861			45.8	0.0419	0.0454	0.0459	0.0303	0.0278	0.0333	0.0296	0.0178		0.0261	0.0276	0.0303	0.0234	0.021	0.0289	0.0242	0.0219		0.0399	0.0432	0.0439	0.0354	0.028	0.0343	0.03	0.0189			45.8	0.0417	0.0455	0.0458	0.0367	0.027	0.033	0.0292	0.0176
46	0.04539	0.05376	0.04435	0.03335	0.02278	0.03633	0.02643	0.01136			46	0.0418	0.0454	0.0458	0.0302	0.0279	0.0331	0.0293	0.0178		0.0259	0.0275	0.0302	0.0232	0.0209	0.0287	0.0241	0.0218		0.0399	0.0432	0.0438	0.0352	0.028	0.0341	0.0299	0.0187			46	0.0417	0.0454	0.0457	0.0365	0.0269	0.0327	0.0289	0.0176
46.2	0.04674	0.05201	0.04465	0.0328	0.02378	0.03248	0.02758	0.00981			46.2	0.0417	0.0455	0.0457	0.03	0.028	0.0328	0.0292	0.0178		0.0259	0.0276	0.03	0.023	0.0208	0.0286	0.0239	0.0217		0.0399	0.043	0.0436	0.0351	0.0279	0.0339	0.0298	0.0187			46.2	0.0417	0.0454	0.0455	0.0363	0.0269	0.0326	0.0287	0.0167
46.4	0.04624	0.05291	0.04875	0.0358	0.02723	0.03363	0.03103	0.00736			46.4	0.0418	0.0457	0.0457	0.03	0.028	0.0325	0.0293	0.0179		0.0261	0.0278	0.03	0.0229	0.0207	0.0285	0.0238	0.0216		0.04	0.0431	0.0436	0.035	0.0278	0.0338	0.0297	0.0185			46.4	0.0417	0.0455	0.0454	0.0362	0.0269	0.0325	0.0286	0.0162
46.6	0.04724	0.05141	0.0517	0.0466	0.02863	0.03508	0.02793	0.01066			46.6	0.0419	0.0459	0.0456	0.0299	0.0278	0.0324	0.0294	0.0177		0.0261	0.0276	0.0299	0.0229	0.0207	0.0283	0.0238	0.0215		0.0399	0.0433	0.0436	0.0349	0.0278	0.0337	0.0296	0.0186			46.6	0.0419	0.0458	0.0453	0.0363	0.0268	0.0324	0.0286	0.0164
46.8	0.04604	0.05051	0.0501	0.04465	0.02538	0.03683	0.02843	0.01001			46.8	0.042	0.046	0.0458	0.03	0.0277	0.0323	0.0294	0.0177		0.0263	0.0277	0.03	0.0229	0.0207	0.0283	0.0237	0.0215		0.04	0.0434	0.0436	0.0348	0.0277	0.0336	0.0295	0.0186			46.8	0.0419	0.046	0.0456	0.0364	0.0267	0.0324	0.0286	0.017
47	0.04504	0.05151	0.04935	0.0386	0.02493	0.03528	0.02653	0.00871			47	0.042	0.0457	0.0459	0.03	0.0274	0.0323	0.0293	0.0176		0.0264	0.0276	0.03	0.0228	0.0207	0.0282	0.0236	0.0214		0.0402	0.0435	0.0438	0.0348	0.0276	0.0336	0.0294	0.0185			47	0.0421	0.0459	0.0458	0.0363	0.0265	0.0323	0.0287	0.0173
47.2	0.04474	0.05021	0.0471	0.03695	0.02658	0.03478	0.02498	0.00856			47.2	0.0422	0.0453	0.046	0.0301	0.0272	0.0325	0.0291	0.0175		0.0265	0.0272	0.0301	0.0229	0.0207	0.0282	0.0236	0.0215		0.0401	0.0432	0.0439	0.0348	0.0275	0.0335	0.0293	0.0184			47.2	0.0421	0.0456	0.046	0.0362	0.0263	0.0321	0.0286	0.0172
47.4	0.04339	0.05036	0.0447	0.03415	0.02898	0.03458	0.02648	0.00771			47.4	0.042	0.0448	0.0459	0.0301	0.0272	0.0327	0.0289	0.0173		0.0266	0.027	0.0301	0.023	0.0208	0.0284	0.0235	0.0214		0.0401	0.0427	0.0439	0.0348	0.0274	0.0335	0.0292	0.0183			47.4	0.0419	0.045	0.046	0.0361	0.0262	0.032	0.0284	0.0167
47.6	0.04449	0.04966	0.04425	0.03365	0.03108	0.03538	0.02823	0.00836			47.6	0.0415	0.0444	0.0458	0.0299	0.0272	0.0327	0.0288	0.0175		0.0264	0.0268	0.0299	0.023	0.0209	0.0284	0.0237	0.0213		0.0399	0.0422	0.0438	0.0348	0.0273	0.0335	0.0291	0.0184			47.6	0.0417	0.0444	0.0457	0.036	0.0262	0.032	0.0282	0.0161
47.8	0.04344	0.05141	0.04425	0.03575	0.03043	0.03278	0.02813	0.00731			47.8	0.0411	0.044	0.0455	0.0298	0.0272	0.0327	0.0287	0.0175		0.0262	0.0266	0.0298	0.023	0.021	0.0286	0.0238	0.0214		0.0395	0.0418	0.0435	0.0348	0.0273	0.0335	0.029	0.0185			47.8	0.0413	0.0436	0.0454	0.036	0.0261	0.032	0.0282	0.0163
48	0.04314	0.05241	0.04545	0.038	0.02963	0.03303	0.02708	0.00756			48	0.0407	0.0437	0.0453	0.0297	0.0273	0.0324	0.0286	0.0178		0.0261	0.0264	0.0297	0.023	0.021	0.0285	0.0238	0.0214		0.0391	0.0414	0.0432	0.0347	0.0273	0.0334	0.0289	0.0185			48	0.0407	0.0433	0.0451	0.036	0.0261	0.0319	0.0283	0.0169
48.2	0.04269	0.04981	0.0487	0.0374	0.02923	0.03248	0.02798	0.00896			48.2	0.0402	0.0434	0.0449	0.0294	0.0272	0.032	0.0285	0.0177		0.0257	0.0265	0.0294	0.0229	0.021	0.0283	0.0238	0.0214		0.0385	0.0412	0.0428	0.0346	0.0272	0.0331	0.0288	0.0183			48.2	0.0402	0.0433	0.0446	0.0358	0.0261	0.0318	0.0282	0.0172
48.4	0.04459	0.05231	0.04615	0.0396	0.02468	0.03468	0.02628	0.00896			48.4	0.04	0.0435	0.0447	0.0292	0.027	0.0316	0.0283	0.0179		0.0256	0.0266	0.0292	0.0227	0.0209	0.0282	0.0237	0.0214		0.0384	0.0414	0.0425	0.0343	0.0271	0.0329	0.0288	0.0182			48.4	0.04	0.0436	0.0445	0.0356	0.026	0.0316	0.0282	0.0173
48.6	0.04489	0.05211	0.04795	0.0353	0.02278	0.03363	0.02608	0.01151			48.6	0.0401	0.0436	0.0445	0.0292	0.0267	0.0314	0.0281	0.0175		0.0254	0.0267	0.0292	0.0226	0.0206	0.0279	0.0235	0.0214		0.0384	0.0413	0.0424	0.0339	0.0269	0.0326	0.0286	0.0182			48.6	0.04	0.0438	0.0443	0.0353	0.0259	0.0312	0.0278	0.017
48.8	0.04354	0.04961	0.0485	0.03385	0.02673	0.03263	0.02638	0.00766			48.8	0.04	0.044	0.0443	0.0292	0.0263	0.0312	0.0279	0.0173		0.0255	0.0267	0.0292	0.0224	0.0204	0.0276	0.0234	0.0214		0.0384	0.0416	0.0424	0.0337	0.0267	0.0323	0.0285	0.0183			48.8	0.0401	0.0438	0.0444	0.035	0.0258	0.031	0.0274	0.0164
49	0.04274	0.05016	0.04595	0.03295	0.02728	0.03193	0.02558	0.00691			49	0.0402	0.0438	0.0443	0.0292	0.026	0.0313	0.0277	0.0172		0.0254	0.0269	0.0292	0.0223	0.0202	0.0275	0.0232	0.0213		0.0384	0.0414	0.0425	0.0335	0.0264	0.0321	0.0282	0.0183			49	0.0403	0.0439	0.0444	0.035	0.0256	0.0308	0.0272	0.0159
49.2	0.04394	0.05191	0.0443	0.03685	0.03073	0.03128	0.02598	0.00726			49.2	0.0403	0.0437	0.0444	0.0292	0.0257	0.0314	0.0276	0.0172		0.0256	0.0266	0.0292	0.0223	0.0201	0.0275	0.023	0.0211		0.0385	0.0415	0.0425	0.0335	0.0262	0.032	0.028	0.0181			49.2	0.0402	0.0438	0.0444	0.0351	0.0253	0.0308	0.0271	0.0162
49.4	0.04344	0.05251	0.0434	0.0367	0.02888	0.03313	0.02588	0.01131			49.4	0.0402	0.0432	0.0445	0.0293	0.0255	0.0314	0.0274	0.0171		0.0257	0.0265	0.0293	0.0223	0.02	0.0274	0.023	0.0211		0.0384	0.0414	0.0425	0.0336	0.026	0.0321	0.0278	0.0179			49.4	0.0402	0.0435	0.0443	0.0353	0.0251	0.0309	0.0269	0.0166
49.6	0.04304	0.05251	0.0433	0.0361	0.02738	0.03453	0.02753	0.01041			49.6	0.0399	0.0432	0.0445	0.0292	0.0254	0.0314	0.0271	0.0173		0.0259	0.0264	0.0292	0.0224	0.02	0.0276	0.023	0.021		0.0383	0.0411	0.0425	0.0339	0.0259	0.0323	0.0276	0.0179			49.6	0.04	0.0433	0.0443	0.0355	0.0248	0.0311	0.0269	0.0168
49.8	0.04249	0.05171	0.04445	0.03975	0.02538	0.03398	0.02883	0.00971			49.8	0.0394	0.043	0.0443	0.029	0.0254	0.0313	0.0269	0.0172		0.0256	0.0261	0.029	0.0224	0.0201	0.0277	0.023	0.0209		0.038	0.041	0.0423	0.034	0.0258	0.0324	0.0276	0.0179			49.8	0.0396	0.0431	0.0443	0.0355	0.0246	0.031	0.0269	0.0166
50	0.04239	0.05001	0.045	0.0376	0.02483	0.03468	0.02748	0.00906			50	0.039	0.043	0.0442	0.029	0.0254	0.0312	0.0269	0.017		0.0255	0.0261	0.029	0.0224	0.0202	0.0278	0.0231	0.0208		0.0376	0.041	0.0422	0.034	0.0258	0.0325	0.0276	0.0178			50	0.0392	0.043	0.0443	0.0353	0.0245	0.0309	0.0268	0.0161
50.2	0.04259	0.05041	0.04595	0.0335	0.02613	0.03388	0.02698	0.00796			50.2	0.0388	0.0429	0.0441	0.029	0.0252	0.0312	0.027	0.017		0.0254	0.026	0.029	0.0223	0.0202	0.0277	0.0231	0.0209		0.0372	0.0409	0.042	0.0339	0.0257	0.0325	0.0276	0.0178			50.2	0.0388	0.043	0.0442	0.035	0.0243	0.0308	0.0267	0.0157
50.4	0.04254	0.04936	0.04655	0.0344	0.02563	0.03033	0.02438	0.00691			50.4	0.0385	0.0431	0.0438	0.0289	0.0252	0.0311	0.0271	0.017		0.0252	0.0262	0.0289	0.0222	0.0202	0.0275	0.0232	0.0209		0.037	0.0409	0.0419	0.0337	0.0256	0.0323	0.0276	0.0177			50.4	0.0384	0.0428	0.044	0.0347	0.0241	0.0307	0.0267	0.0159
50.6	0.04204	0.04721	0.0469	0.03245	0.02723	0.03223	0.02578	0.00696			50.6	0.0385	0.043	0.0437	0.0289	0.0251	0.031	0.0272	0.017		0.0249	0.0264	0.0289	0.022	0.02	0.0274	0.0229	0.0208		0.037	0.0409	0.0418	0.0332	0.0255	0.0321	0.0276	0.0176			50.6	0.0385	0.0431	0.0437	0.0344	0.024	0.0308	0.0266	0.0163
50.8	0.04019	0.04906	0.0447	0.03315	0.02708	0.03233	0.02558	0.01161			50.8	0.0386	0.0431	0.0435	0.0289	0.0251	0.0308	0.0271	0.0172		0.0248	0.0266	0.0289	0.0218	0.0197	0.0272	0.0228	0.0208		0.0371	0.0411	0.0417	0.0329	0.0255	0.0318	0.0275	0.0177			50.8	0.0386	0.0431	0.0436	0.0342	0.0241	0.0307	0.0266	0.0165
51	0.04139	0.05221	0.0451	0.03345	0.02838	0.03128	0.02553	0.00841			51	0.0389	0.0429	0.0436	0.029	0.0252	0.0307	0.0269	0.0169		0.0248	0.0266	0.029	0.0218	0.0195	0.0272	0.0227	0.0207		0.0373	0.041	0.0416	0.0326	0.0254	0.0315	0.0274	0.0177			51	0.0389	0.0428	0.0434	0.034	0.0242	0.0305	0.0266	0.0164
51.2	0.04239	0.05371	0.04835	0.03225	0.02573	0.03063	0.02433	0.00726			51.2	0.0392	0.0424	0.0436	0.029	0.0254	0.0305	0.0267	0.0169		0.0248	0.0264	0.029	0.0217	0.0194	0.0271	0.0225	0.0205		0.0375	0.0408	0.0416	0.0324	0.0253	0.0312	0.0273	0.0177			51.2	0.0392	0.0424	0.0431	0.0338	0.0245	0.0302	0.0263	0.0163
51.4	0.04139	0.05551	0.04905	0.03665	0.02133	0.03273	0.02803	0.00786			51.4	0.0393	0.042	0.0435	0.0289	0.0255	0.0303	0.0267	0.0169		0.0249	0.0262	0.0289	0.0217	0.0194	0.0271	0.0224	0.0204		0.0377	0.0404	0.0415	0.0323	0.0253	0.031	0.0272	0.0176			51.4	0.0392	0.042	0.0432	0.0338	0.0248	0.0299	0.0262	0.0159
51.6	0.04179	0.05151	0.04905	0.03475	0.02613	0.03153	0.02648	0.00711			51.6	0.0391	0.0418	0.0433	0.0287	0.0255	0.0302	0.0266	0.0167		0.0249	0.0261	0.0287	0.0218	0.0194	0.0272	0.0223	0.0203		0.0375	0.0402	0.0414	0.0324	0.0253	0.0309	0.0271	0.0175			51.6	0.0392	0.0418	0.043	0.0338	0.025	0.0296	0.0262	0.0156
51.8	0.04184	0.05046	0.04605	0.03135	0.02563	0.03168	0.02643	0.01131			51.8	0.0389	0.0417	0.0431	0.0285	0.0254	0.03	0.0267	0.017		0.0249	0.0259	0.0285	0.0218	0.0196	0.0272	0.0224	0.0204		0.0373	0.0399	0.0412	0.0324	0.0253	0.031	0.027	0.0175			51.8	0.0391	0.0417	0.0429	0.0339	0.025	0.0295	0.0261	0.0157
52	0.04174	0.04981	0.0467	0.0337	0.02628	0.03248	0.02408	0.01006			52	0.0386	0.0417	0.0429	0.0285	0.0252	0.03	0.0267	0.0169		0.025	0.0257	0.0285	0.0218	0.0198	0.0273	0.0226	0.0204		0.0371	0.0401	0.0411	0.0325	0.0253	0.0312	0.0269	0.0175			52	0.0388	0.0419	0.0429	0.0341	0.0248	0.0295	0.0263	0.016
52.2	0.04159	0.05051	0.0458	0.03215	0.02628	0.03213	0.02638	0.00931			52.2	0.0384	0.042	0.043	0.0284	0.0249	0.03	0.0267	0.0167		0.0251	0.0258	0.0284	0.0217	0.0199	0.0272	0.0227	0.0204		0.0367	0.0401	0.041	0.0326	0.0252	0.0313	0.0269	0.0175			52.2	0.0384	0.0422	0.0431	0.0341	0.0245	0.0296	0.0264	0.0162
52.4	0.04234	0.04901	0.0442	0.03025	0.02803	0.03283	0.02643	0.00961			52.4	0.0382	0.0421	0.043	0.0285	0.0245	0.0301	0.0265	0.0168		0.0249	0.0261	0.0285	0.0217	0.0198	0.0271	0.0227	0.0206		0.0366	0.0403	0.041	0.0325	0.0251	0.0314	0.027	0.0173			52.4	0.0383	0.0423	0.043	0.0338	0.024	0.0297	0.0263	0.0163
52.6	0.04139	0.04846	0.0439	0.0321	0.02723	0.03203	0.02578	0.00716			52.6	0.0382	0.0423	0.043	0.0285	0.0243	0.0303	0.0265	0.0164		0.0248	0.026	0.0285	0.0217	0.0197	0.027	0.0225	0.0206		0.0367	0.0403	0.041	0.0323	0.025	0.0313	0.0269	0.0172			52.6	0.0384	0.0423	0.043	0.0336	0.0236	0.0299	0.0263	0.016
52.8	0.04189	0.04981	0.0443	0.0347	0.02803	0.03218	0.02773	0.00786			52.8	0.0383	0.0425	0.043	0.0289	0.0242	0.0305	0.0264	0.0163		0.025	0.0261	0.0289	0.0217	0.0196	0.0269	0.0225	0.0206		0.0368	0.0406	0.0409	0.0322	0.0249	0.0311	0.0268	0.0173			52.8	0.0385	0.0425	0.0431	0.0334	0.0234	0.03	0.0262	0.0158
53	0.04054	0.04801	0.04655	0.0356	0.02718	0.03193	0.02558	0.01456			53	0.0386	0.0426	0.0431	0.0289	0.0243	0.0305	0.0263	0.0167		0.0249	0.0262	0.0289	0.0215	0.0195	0.0268	0.0224	0.0205		0.0369	0.0405	0.0409	0.032	0.0248	0.0309	0.0267	0.0175			53	0.0386	0.0424	0.0431	0.0332	0.0233	0.03	0.026	0.0158
53.2	0.04124	0.04881	0.04805	0.0364	0.02553	0.03183	0.02553	0.01186			53.2	0.0391	0.0423	0.0433	0.0289	0.0246	0.0302	0.0261	0.0167		0.0249	0.0264	0.0289	0.0216	0.0193	0.0269	0.0223	0.0203		0.0372	0.0406	0.0409	0.032	0.0248	0.0307	0.0265	0.0175			53.2	0.039	0.0423	0.0431	0.0332	0.0236	0.03	0.0259	0.016
53.4	0.04109	0.05056	0.046	0.0338	0.02408	0.03078	0.02488	0.01056			53.4	0.0391	0.042	0.0433	0.0289	0.025	0.0298	0.026	0.0171		0.025	0.0264	0.0289	0.0217	0.0193	0.027	0.0222	0.0203		0.0374	0.0402	0.041	0.0319	0.0249	0.0305	0.0264	0.0175			53.4	0.039	0.042	0.0431	0.0334	0.0239	0.0299	0.0258	0.0162
53.6	0.03969	0.04791	0.0456	0.0334	0.02448	0.02938	0.02538	0.00836			53.6	0.0389	0.0418	0.0433	0.0288	0.0252	0.0294	0.026	0.0169		0.025	0.0265	0.0288	0.0217	0.0194	0.0271	0.0223	0.0202		0.0373	0.0403	0.0409	0.0321	0.0249	0.0304	0.0264	0.0173			53.6	0.0389	0.0417	0.0433	0.0336	0.0243	0.0296	0.0257	0.0164
53.8	0.04064	0.04806	0.0439	0.0344	0.02483	0.02958	0.02413	0.00651			53.8	0.0388	0.0418	0.0432	0.0287	0.0252	0.0291	0.0259	0.0166		0.0252	0.0264	0.0287	0.0217	0.0196	0.0272	0.0224	0.0202		0.037	0.0399	0.041	0.0322	0.0249	0.0304	0.0263	0.0172			53.8	0.0389	0.0417	0.0432	0.0336	0.0244	0.0294	0.0255	0.0163
54	0.04084	0.04751	0.04185	0.03395	0.02583	0.02893	0.02758	0.00726			54	0.0385	0.042	0.0431	0.0287	0.025	0.029	0.0259	0.0164		0.0253	0.0264	0.0287	0.0217	0.0197	0.0273	0.0224	0.0202		0.0371	0.0401	0.0409	0.0322	0.0248	0.0305	0.0264	0.0171			54	0.0386	0.0421	0.0431	0.0338	0.0244	0.029	0.0255	0.016
54.2	0.04159	0.04726	0.0421	0.034	0.02768	0.03103	0.02573	0.00611			54.2	0.0385	0.0422	0.0432	0.0288	0.0247	0.0291	0.026	0.0163		0.0255	0.0264	0.0288	0.0217	0.0197	0.0272	0.0226	0.0204		0.0367	0.0401	0.0408	0.0321	0.0247	0.0306	0.0264	0.0171			54.2	0.0384	0.0422	0.0431	0.0336	0.0241	0.0288	0.0255	0.0156
54.4	0.04069	0.04511	0.04545	0.03155	0.02603	0.03038	0.02628	0.01371			54.4	0.0384	0.0424	0.0431	0.0288	0.0242	0.0293	0.0261	0.0162		0.0253	0.0263	0.0288	0.0218	0.0198	0.0272	0.0226	0.0205		0.0367	0.0404	0.0408	0.0321	0.0245	0.0307	0.0264	0.017			54.4	0.0385	0.0423	0.043	0.0334	0.0237	0.0288	0.0255	0.0154
54.6	0.04009	0.04501	0.045	0.0318	0.02658	0.02943	0.02558	0.01146			54.6	0.0382	0.0423	0.0431	0.029	0.0237	0.0296	0.0261	0.0163		0.0252	0.0262	0.029	0.0219	0.0197	0.0272	0.0226	0.0205		0.0366	0.0405	0.0408	0.0319	0.0243	0.0307	0.0263	0.0171			54.6	0.0384	0.0422	0.043	0.0334	0.0232	0.0289	0.0256	0.0155
54.8	0.04179	0.04626	0.0444	0.0348	0.02683	0.03263	0.02483	0.01091			54.8	0.0383	0.0421	0.0429	0.0291	0.0235	0.0299	0.026	0.0162		0.0253	0.0264	0.0291	0.0218	0.0197	0.0272	0.0225	0.0205		0.0367	0.0404	0.0408	0.0318	0.0243	0.0306	0.0262	0.0171			54.8	0.0383	0.0422	0.0429	0.0333	0.0229	0.0292	0.0257	0.0156
55	0.04049	0.04616	0.0447	0.03425	0.02593	0.03088	0.02518	0.00861			55	0.0385	0.042	0.0428	0.029	0.0235	0.03	0.0257	0.0167		0.0251	0.0261	0.029	0.0218	0.0197	0.0271	0.0225	0.0204		0.0367	0.0405	0.0408	0.0317	0.0242	0.0304	0.026	0.0172			55	0.0384	0.0421	0.0425	0.0331	0.0228	0.0295	0.0256	0.016
55.2	0.04019	0.04836	0.0437	0.0363	0.02438	0.03133	0.02708	0.00791			55.2	0.0387	0.0417	0.0427	0.029	0.0238	0.0298	0.0254	0.0168		0.025	0.0264	0.029	0.0217	0.0197	0.0272	0.0224	0.0203		0.0367	0.0402	0.0407	0.0317	0.0243	0.0303	0.0259	0.0173			55.2	0.0387	0.0419	0.0426	0.0332	0.023	0.0295	0.0254	0.0162
55.4	0.03954	0.04836	0.04	0.03365	0.02603	0.03108	0.02533	0.00911			55.4	0.0386	0.0415	0.0426	0.0288	0.0241	0.0294	0.0252	0.0168		0.0251	0.0264	0.0288	0.0216	0.0197	0.0271	0.0224	0.0203		0.037	0.04	0.0406	0.0317	0.0244	0.0302	0.0258	0.0173			55.4	0.0386	0.0415	0.0427	0.0331	0.0234	0.0292	0.0251	0.0163
55.6	0.04109	0.04606	0.0408	0.03345	0.02588	0.03258	0.02628	0.00806			55.6	0.0386	0.0413	0.0425	0.0288	0.0245	0.029	0.0253	0.0168		0.025	0.0264	0.0288	0.0216	0.0198	0.0271	0.0225	0.0203		0.0371	0.04	0.0405	0.0318	0.0245	0.0301	0.0258	0.0172			55.6	0.0387	0.0416	0.0426	0.033	0.0237	0.0289	0.0249	0.0162
55.8	0.03924	0.04586	0.0403	0.028	0.02653	0.03048	0.02703	0.01056			55.8	0.0385	0.0413	0.0425	0.0287	0.0246	0.0286	0.0254	0.0166		0.0252	0.0264	0.0287	0.0216	0.0198	0.0272	0.0224	0.0204		0.0368	0.0399	0.0405	0.0319	0.0246	0.03	0.0259	0.0171			55.8	0.0386	0.0417	0.0425	0.0331	0.0239	0.0286	0.025	0.0161
56	0.04089	0.04686	0.04255	0.03015	0.02328	0.03063	0.02338	0.01326			56	0.0381	0.0414	0.0424	0.0287	0.0246	0.0284	0.0253	0.0165		0.0254	0.0263	0.0287	0.0217	0.0198	0.0271	0.0225	0.0205		0.0368	0.0402	0.0406	0.0318	0.0246	0.03	0.0259	0.0169			56	0.0383	0.0418	0.0426	0.0333	0.024	0.0284	0.025	0.0159
56.2	0.03964	0.04566	0.0474	0.0316	0.02688	0.03163	0.02453	0.01221			56.2	0.038	0.0419	0.0425	0.0287	0.0244	0.0285	0.0252	0.0164		0.0254	0.0262	0.0287	0.0218	0.0198	0.0272	0.0226	0.0205		0.0367	0.0401	0.0406	0.0318	0.0245	0.03	0.026	0.0168			56.2	0.0381	0.0419	0.0426	0.0332	0.0238	0.0285	0.0249	0.0159
56.4	0.04044	0.04701	0.04665	0.03495	0.02383	0.03103	0.02658	0.00876			56.4	0.0379	0.0419	0.0423	0.0289	0.024	0.0287	0.0251	0.0163		0.0255	0.0263	0.0289	0.0218	0.0197	0.0272	0.0225	0.0204		0.0365	0.0404	0.0408	0.0318	0.0244	0.03	0.026	0.0168			56.4	0.0381	0.042	0.0425	0.0334	0.0234	0.0286	0.0249	0.0159
56.6	0.03984	0.04766	0.0441	0.0367	0.02303	0.02678	0.02953	0.00726			56.6	0.0379	0.042	0.0425	0.0289	0.0235	0.0291	0.0252	0.0161		0.0254	0.0262	0.0289	0.0219	0.0197	0.0272	0.0226	0.0205		0.0364	0.0404	0.0408	0.0316	0.0243	0.0301	0.026	0.017			56.6	0.038	0.0419	0.0425	0.0334	0.0231	0.0288	0.0249	0.0158
56.8	0.03959	0.04881	0.04155	0.03715	0.02368	0.03143	0.02478	0.00686			56.8	0.0378	0.0418	0.0424	0.029	0.0232	0.0295	0.0252	0.0159		0.0254	0.0263	0.029	0.0219	0.0198	0.0272	0.0226	0.0204		0.0365	0.0403	0.0407	0.0316	0.0241	0.0302	0.0259	0.0169			56.8	0.0379	0.0418	0.0424	0.0334	0.0228	0.029	0.0249	0.0155
57	0.03969	0.04786	0.04115	0.035	0.02653	0.03098	0.02458	0.00656			57	0.0379	0.0418	0.0424	0.029	0.0231	0.0298	0.0252	0.0159		0.0254	0.0264	0.029	0.0219	0.0198	0.0273	0.0226	0.0204		0.0365	0.0403	0.0407	0.0316	0.024	0.0302	0.0257	0.017			57	0.0378	0.0417	0.0424	0.0332	0.0226	0.0293	0.025	0.0152
57.2	0.04039	0.04791	0.0403	0.03245	0.02473	0.03228	0.02583	0.01061			57.2	0.0379	0.0415	0.0424	0.029	0.0232	0.0297	0.0252	0.0162		0.0253	0.0264	0.029	0.0219	0.0199	0.0272	0.0226	0.0205		0.0363	0.0402	0.0405	0.0316	0.024	0.0301	0.0256	0.0169			57.2	0.0378	0.0416	0.0424	0.0332	0.0225	0.0295	0.0251	0.0152
57.4	0.04034	0.04641	0.044	0.0335	0.02658	0.03008	0.02678	0.00926			57.4	0.0378	0.0415	0.0425	0.029	0.0235	0.0293	0.025	0.0168		0.0253	0.0266	0.029	0.0219	0.0199	0.0273	0.0226	0.0205		0.0364	0.0399	0.0405	0.0316	0.024	0.0301	0.0255	0.0169			57.4	0.0379	0.0417	0.0423	0.033	0.0227	0.0293	0.0251	0.0157
57.6	0.03999	0.04511	0.0445	0.0347	0.02628	0.03228	0.02723	0.00916			57.6	0.0379	0.0413	0.0424	0.029	0.0237	0.0289	0.0249	0.0171		0.0253	0.0265	0.029	0.0218	0.0198	0.0272	0.0226	0.0205		0.0365	0.04	0.0404	0.0316	0.0241	0.0299	0.0255	0.0169			57.6	0.038	0.0417	0.0424	0.0329	0.023	0.0289	0.025	0.0163
57.8	0.04029	0.04691	0.04435	0.03565	0.02483	0.03128	0.02218	0.00806			57.8	0.0379	0.0414	0.0423	0.029	0.024	0.0285	0.025	0.0171		0.0253	0.0266	0.029	0.0218	0.0198	0.0273	0.0226	0.0205		0.0364	0.0399	0.0403	0.0315	0.0241	0.0298	0.0255	0.0169			57.8	0.038	0.0416	0.0424	0.0326	0.0232	0.0284	0.0248	0.0167
58	0.03929	0.04796	0.0429	0.03775	0.02178	0.03178	0.02563	0.00641			58	0.0379	0.0414	0.0422	0.029	0.024	0.0282	0.025	0.0164		0.0253	0.0266	0.029	0.0219	0.0198	0.0273	0.0226	0.0205		0.0364	0.0401	0.0404	0.0315	0.0242	0.0297	0.0255	0.0168			58	0.038	0.0414	0.0424	0.0325	0.0234	0.028	0.0247	0.0165
58.2	0.03889	0.04771	0.04365	0.03545	0.02333	0.03128	0.02398	0.00636			58.2	0.0377	0.0416	0.0422	0.0289	0.0238	0.0282	0.025	0.0157		0.0251	0.0263	0.0289	0.0218	0.0197	0.0273	0.0226	0.0204		0.0364	0.0399	0.0403	0.0314	0.0242	0.0296	0.0256	0.0167			58.2	0.0379	0.0416	0.0423	0.0324	0.0234	0.0278	0.0248	0.0159
58.4	0.03924	0.04696	0.0409	0.03015	0.02478	0.03193	0.02653	0.00866			58.4	0.0376	0.0417	0.0422	0.029	0.0235	0.0284	0.0249	0.0154		0.0252	0.0265	0.029	0.0219	0.0197	0.0273	0.0226	0.0204		0.0364	0.0399	0.0404	0.0314	0.0241	0.0296	0.0256	0.0167			58.4	0.0378	0.0416	0.0422	0.0325	0.0233	0.0278	0.0247	0.0151
58.6	0.04034	0.04641	0.0404	0.03315	0.02518	0.03053	0.02438	0.01056			58.6	0.0376	0.0418	0.0422	0.0289	0.0233	0.0287	0.0249	0.0155		0.0252	0.0265	0.0289	0.0218	0.0197	0.0273	0.0226	0.0204		0.0363	0.04	0.0404	0.0313	0.0241	0.0296	0.0256	0.0167			58.6	0.0377	0.0417	0.0421	0.0326	0.0232	0.028	0.0247	0.0148
58.8	0.03974	0.04586	0.04215	0.03125	0.02648	0.03018	0.02423	0.00891			58.8	0.0377	0.0419	0.0422	0.0289	0.0232	0.0289	0.0249	0.0158		0.0252	0.0264	0.0289	0.0219	0.0198	0.0272	0.0226	0.0205		0.0361	0.0399	0.0403	0.0312	0.024	0.0296	0.0255	0.0167			58.8	0.0376	0.0419	0.042	0.0328	0.0229	0.0285	0.0248	0.0149
59											59	0.0377	0.0416	0.0422	0.0289	0.0232	0.029	0.0247	0.0161		0.0254	0.0261	0.0289	0.0219	0.0198	0.0272	0.0225	0.0205		0.0363	0.0399	0.0404	0.0312	0.024	0.0297	0.0254	0.0168			59	0.0377	0.0419	0.042	0.0329	0.0228	0.0288	0.0248	0.0153
59.2											59.2	0.0378	0.0413	0.0422	0.0289	0.0233	0.0289	0.0246	0.0162		0.0252	0.0261	0.0289	0.0218	0.0198	0.0272	0.0226	0.0205		0.0362	0.0398	0.0401	0.0313	0.0239	0.0297	0.0253	0.0169			59.2	0.0377	0.0416	0.042	0.033	0.0227	0.0289	0.0247	0.0158
59.4											59.4	0.0376	0.0411	0.042	0.0288	0.0235	0.0287	0.0245	0.0162		0.0251	0.0261	0.0288	0.0218	0.0198	0.0272	0.0226	0.0205		0.0361	0.0396	0.0402	0.0313	0.0239	0.0297	0.0253	0.0169			59.4	0.0377	0.0413	0.0422	0.0327	0.0227	0.0288	0.0245	0.0159
59.6											59.6	0.0374	0.041	0.042	0.0287	0.0236	0.0284	0.0245	0.016		0.0249	0.0258	0.0287	0.0218	0.0198	0.0272	0.0225	0.0205		0.036	0.0392	0.0401	0.0313	0.0239	0.0297	0.0253	0.0168			59.6	0.0376	0.0411	0.0421	0.0325	0.0228	0.0285	0.0244	0.0159
59.8											59.8	0.0375	0.0407	0.0419	0.0287	0.0237	0.0282	0.0246	0.0159		0.0249	0.0258	0.0287	0.0218	0.0197	0.0272	0.0226	0.0205		0.036	0.039	0.04	0.0313	0.0239	0.0296	0.0253	0.0167			59.8	0.0374	0.0408	0.0419	0.0325	0.023	0.0282	0.0245	0.0156
[truncated: 1 more rows]
