# Supplementary material for: Application of different building representation techniques in HEC-RAS 2-D for urban flood modeling using the Toce River experimental case
Source: PeerJ. 2021 Jul 2;9:e11667. doi: 10.7717/peerj.11667 (PMC8256810; doi:10.7717/peerj.11667)
Supplement: Supplemental Information 4 [file peerj-09-11667-s004.xlsx]

## Sheet: BB technique(1A)
t	S3	S4	S5	S6	S7	S8	S9	S10		time	p3	p4	p5	p6	p7	p8	p9	p10		t	HEC_P3	HEC_P4	HEC_P5	HEC_P6	HEC_P7	HEC_P8	HEC_P9	HEC_P10		HEC_1A_2_P3	HEC_1A_2_P4	HEC_1A_2_P5	HEC_1A_2_P6	HEC_1A_2_P7	HEC_1A_2_P8	HEC_1A_2_P9	HEC_1A_2_P10		HEC_1A_5_P3	HEC_1A_5_P4	HEC_1A_5_P5	HEC_1A_5_P6	HEC_1A_5_P7	HEC_1A_5_P8	HEC_1A_5_P9	HEC_1A_5_P10		HEC_Dif_P3	HEC_Dif_P4
0	0.00011	-8e-05	0.00039	6e-05	0	-3e-05	-7e-05	-4e-05		6.05	0	0	0	0	0	0	0	0		0	0	0	0	0	0	0	0	0		0	0	0	0	0	0	0	0		0	0	0	0	0	0	0	0		0	0
0.2	-0.00014	7e-05	-6e-05	0.00011	0	-3e-05	-7e-05	-9e-05		6.1	0	0	0	0	0	0	0	0		0.2	0	0	0	0	0	0	0	0		0	0	0	0	0	0	0	0		0	0	0	0	0	0	0	0		0	0
0.4	-0.00014	-3e-05	-6e-05	6e-05	-0.00015	0.00012	-2e-05	-9e-05		6.15	0	0	0	0	0	0	0	0		0.4	0	0	0	0	0	0	0	0		0	0	0	0	0	0	0	0		0	0	0	0	0	0	0	0		0	0
0.6	6e-05	2e-05	-6e-05	6e-05	5e-05	-8e-05	3e-05	-9e-05		6.2	0	0	0	0	0	0	0	0		0.6	0	0	0	0	0	0	0	0		0	0	0	0	0	0	0	0		0	0	0	0	0	0	0	0		0	0
0.8	1e-05	-0.00013	4e-05	6e-05	-5e-05	-3e-05	3e-05	-9e-05		6.25	0	0	0	0	0	0	0	0		0.8	0	0	0	0	0	0	0	0		0	0	0	0	0	0	0	0		0	0	0	0	0	0	0	0		0	0
1	-0.00014	0.00017	-6e-05	6e-05	-0.00015	0.00012	3e-05	-0.00014		6.3	0	0	0	0	0	0	0	0		1	0	0	0	0	0	0	0	0		0	0	0	0	0	0	0	0		0	0	0	0	0	0	0	0		0	0
1.2	1e-05	-3e-05	-0.00021	1e-05	0.0001	-3e-05	-2e-05	-0.00014		6.35	0	0	0	0	0	0	0	0		1.2	0	0	0	0	0	0	0	0		0	0	0	0	0	0	0	0		0	0	0	0	0	0	0	0		0	0
1.4	1e-05	-3e-05	9e-05	6e-05	0	-3e-05	-2e-05	-0.00014		6.4	0	0	0	0	0	0	0	0		1.4	0	0	0	0	0	0	0	0		0	0	0	0	0	0	0	0		0	0	0	0	0	0	0	0		0	0
1.6	0.00026	-0.00013	4e-05	-4e-05	-5e-05	0.00012	-2e-05	-0.00014		6.45	0	0	0	0	0	0	0	0		1.6	0	0	0	0	0	0	0	0		0	0	0	0	0	0	0	0		0	0	0	0	0	0	0	0		0	0
1.8	1e-05	0.00027	-1e-05	-4e-05	0.0002	-0.00013	3e-05	-0.00014		6.5	0	0	0	0	0	0	0	0		1.8	0	0	0	0	0	0	0	0		0	0	0	0	0	0	0	0		0	0	0	0	0	0	0	0		0	0
2	-9e-05	2e-05	-1e-05	1e-05	0	-3e-05	0.00013	-9e-05		6.55	0	0	0	0	0	0	0	0		2	0	0	0	0	0	0	0	0		0	0	0	0	0	0	0	0		0	0	0	0	0	0	0	0		0	0
2.2	0.00011	-0.00018	-1e-05	-4e-05	0	0.00012	0.00013	-9e-05		6.6	0	0	0	0	0	0	0	0		2.2	0	0	0	0	0	0	0	0		0	0	0	0	0	0	0	0		0	0	0	0	0	0	0	0		0	0
2.4	1e-05	-0.00013	-1e-05	1e-05	-0.00015	-0.00013	0.00013	1e-05		6.65	0	0	0	0	0	0	0	0		2.4	0	0	0	0	0	0	0	0		0	0	0	0	0	0	0	0		0	0	0	0	0	0	0	0		0	0
2.6	-9e-05	0.00032	-0.00016	-4e-05	5e-05	7e-05	0.00023	0.00011		6.7	0	0	0	0	0	0	0	0		2.6	0	0	0	0	0	0	0	0		0	0	0	0	0	0	0	0		0	0	0	0	0	0	0	0		0	0
2.8	0.00011	7e-05	4e-05	-4e-05	0	0.00012	-7e-05	0.00031		6.75	0	0	0	0	0	0	0	0		2.8	0	0	0	0	0	0	0	0		0	0	0	0	0	0	0	0		0	0	0	0	0	0	0	0		0	0
3	1e-05	-8e-05	4e-05	-4e-05	-0.00015	-0.00013	-0.00012	0.00021		6.8	0	0	0	0	0	0	0	0		3	0	0	0	0	0	0	0	0		0	0	0	0	0	0	0	0		0	0	0	0	0	0	0	0		0	0
3.2	-0.00014	-0.00013	-0.00016	-9e-05	0.0001	-0.00013	-0.00012	0.00011		6.85	0	0	0	0	0	0	0	0		3.2	0	0	0	0	0	0	0	0		0	0	0	0	0	0	0	0		0	0	0	0	0	0	0	0		0	0
3.4	6e-05	0.00017	0.00034	-4e-05	0	0.00012	-7e-05	0.00011		6.9	0	0	0	0	0	0	0	0		3.4	0	0	0	0	0	0	0	0		0	0	0	0	0	0	0	0		0	0	0	0	0	0	0	0		0	0
3.6	1e-05	-3e-05	-6e-05	-9e-05	0	-0.00018	-7e-05	0.00016		6.95	0	0	0	0	0	0	0	0		3.6	0	0	0	0	0	0	0	0		0	0	0	0	0	0	0	0		0	0	0	0	0	0	0	0		0	0
3.8	-0.00014	2e-05	-1e-05	-4e-05	0.0002	7e-05	-2e-05	0.00011		7	0	0	0	0	0	0	0	0		3.8	0	0	0	0	0	0	0	0		0	0	0	0	0	0	0	0		0	0	0	0	0	0	0	0		0	0
4	1e-05	-8e-05	-0.00016	-9e-05	0	2e-05	-2e-05	6e-05		7.05	0	0	0	0	0	0	0	0		4	0	0	0	0	0	0	0	0		0	0	0	0	0	0	0	0		0	0	0	0	0	0	0	0		0	0
4.2	-4e-05	7e-05	-1e-05	-9e-05	-5e-05	-0.00018	-0.00017	6e-05		7.1	0	0	0	0	0	0	0	0		4.2	0	0	0	0	0	0	0	0		0	0	0	0	0	0	0	0		0	0	0	0	0	0	0	0		0	0
4.4	0.00011	7e-05	-0.00016	-9e-05	5e-05	-8e-05	3e-05	6e-05		7.15	0	0	0	0	0	0	0	0		4.4	0	0	0	0	0	0	0	0		0	0	0	0	0	0	0	0		0	0	0	0	0	0	0	0		0	0
4.6	-4e-05	-3e-05	-0.00021	-4e-05	5e-05	2e-05	3e-05	1e-05		7.2	0	0	0	0	0	0	0	0		4.6	0	0	0	0	0	0	0	0		0	0	0	0	0	0	0	0		0	0	0	0	0	0	0	0		0	0
4.8	-9e-05	-8e-05	4e-05	-4e-05	-5e-05	-0.00023	-2e-05	6e-05		7.25	0	0	0	0	0	0	0	0		4.8	0	0	0	0	0	0	0	0		0	0	0	0	0	0	0	0		0	0	0	0	0	0	0	0		0	0
5	0.00016	-8e-05	-6e-05	1e-05	-0.0002	-3e-05	3e-05	1e-05		7.3	0	0	0	0	0	0	0	0		5	0	0	0	0	0	0	0	0		0	0	0	0	0	0	0	0		0	0	0	0	0	0	0	0		0	0
5.2	-4e-05	7e-05	-0.00011	1e-05	5e-05	-3e-05	8e-05	1e-05		7.35	0	0	0	0	0	0	0	0		5.2	0	0	0	0	0	0	0	0		0	0	0	0	0	0	0	0		0	0	0	0	0	0	0	0		0	0
5.4	-0.00014	2e-05	9e-05	-9e-05	-0.0001	-0.00018	8e-05	1e-05		7.4	0	0	0	0	0	0	0	0		5.4	0	0	0	0	0	0	0	0		0	0	0	0	0	0	0	0		0	0	0	0	0	0	0	0		0	0
5.6	6e-05	-3e-05	-6e-05	-0.00019	-0.0001	-0.00013	0.00013	-9e-05		7.45	0	0	0	0	0	0	0	0		5.6	0	0	0	0	0	0	0	0		0	0	0	0	0	0	0	0		0	0	0	0	0	0	0	0		0	0
5.8	1e-05	-8e-05	-6e-05	1e-05	0.0001	-8e-05	0.00033	-4e-05		7.5	0	0	0	0	0	0	0	0		5.8	0	0	0	0	0	0	0	0		0	0	0	0	0	0	0	0		0	0	0	0	0	0	0	0		0	0
6	-0.00014	7e-05	-0.00021	-4e-05	-0.0001	-3e-05	3e-05	1e-05		7.55	0	0	0	0	0	0	0	0		6	0	0	0	0	0	0	0	0		0	0	0	0	0	0	0	0		0	0	0	0	0	0	0	0		0	0
6.2	6e-05	-3e-05	-1e-05	-4e-05	0	-0.00013	-0.00017	-4e-05		7.6	0	0	0	0	0	0	0	0		6.2	0	0	0	0	0	0	0	0		0	0	0	0	0	0	0	0		0	0	0	0	0	0	0	0		0	0
6.4	1e-05	-3e-05	4e-05	-4e-05	0.0002	2e-05	-0.00012	-4e-05		7.65	0	0	0	0	0	0	0	0		6.4	0	0	0	0	0	0	0	0		0	0	0	0	0	0	0	0		0	0	0	0	0	0	0	0		0	0
6.6	-0.00014	-0.00013	-0.00016	-4e-05	0	0.00032	-7e-05	1e-05		7.7	0	0	0	0	0	0	0	0		6.6	0	0	0	0	0	0	0	0		0	0	0	0	0	0	0	0		0	0	0	0	0	0	0	0		0	0
6.8	1e-05	2e-05	0.00014	-9e-05	0	-0.00013	-7e-05	-4e-05		7.75	0	0	0	0	0	0	0	0		6.8	0	0	0	0	0	0	0	0		0	0	0	0	0	0	0	0		0	0	0	0	0	0	0	0		0	0
7	-4e-05	2e-05	-6e-05	-9e-05	-0.00015	-0.00018	-2e-05	1e-05		7.8	0	0	0	0	0	0	0	0		7	0	0	0	0	0	0	0	0		0	0	0	0	0	0	0	0		0	0	0	0	0	0	0	0		0	0
7.2	6e-05	-0.00013	-6e-05	-4e-05	5e-05	-3e-05	-2e-05	-4e-05		7.85	0	0	0	0	0	0	0	0		7.2	0	0	0	0	0	0	0	0		0	0	0	0	0	0	0	0		0	0	0	0	0	0	0	0		0	0
7.4	1e-05	-0.00018	-0.00016	-9e-05	0	-0.00018	8e-05	-0.00014		7.9	0	0	0	0	0	0	0	0		7.4	0	0	0	0	0	0	0	0		0	0	0	0	0	0	0	0		0	0	0	0	0	0	0	0		0	0
7.6	-9e-05	0.00012	-6e-05	-0.00014	-0.0002	-8e-05	3e-05	-4e-05		7.95	0	0	0	0	0	0	0	0		7.6	0	0	0	0	0	0	0	0		0	0	0	0	0	0	0	0		0	0	0	0	0	0	0	0		0	0
7.8	0.00011	2e-05	-0.00026	-4e-05	5e-05	2e-05	3e-05	1e-05		8	0	0	0	0	0	0	0	0		7.8	0	0	0	0	0	0	0	0		0	0	0	0	0	0	0	0		0	0	0	0	0	0	0	0		0	0
8	-4e-05	-3e-05	-0.00021	-0.00014	-5e-05	-0.00018	-2e-05	-4e-05		8.05	0	0	0	0	0	0	0	0		8	0	0	0	0	0	0	0	0		0	0	0	0	0	0	0	0		0	0	0	0	0	0	0	0		0	0
8.2	-0.00014	-0.00018	4e-05	-0.00014	-0.0001	-3e-05	-2e-05	-9e-05		8.1	0	0	0	0	0	0	0	0		8.2	0	0	0	0	0	0	0	0		0	0	0	0	0	0	0	0		0	0	0	0	0	0	0	0		0	0
8.4	6e-05	7e-05	-6e-05	-0.00014	0.0001	2e-05	8e-05	-9e-05		8.15	0	0	0	0	0	0	0	0		8.4	0	0	0	0	0	0	0	0		0	0	0	0	0	0	0	0		0	0	0	0	0	0	0	0		0	0
8.6	1e-05	-3e-05	-0.00016	-9e-05	-5e-05	-0.00023	8e-05	-9e-05		8.2	0	0	0	0	0	0	0	0		8.6	0	0	0	0	0	0	0	0		0	0	0	0	0	0	0	0		0	0	0	0	0	0	0	0		0	0
8.8	-0.00014	-8e-05	0.00024	-0.00014	-5e-05	2e-05	8e-05	-0.00014		8.25	0	0	0	0	0	0	0	0		8.8	0	0	0	0	0	0	0	0		0	0	0	0	0	0	0	0		0	0	0	0	0	0	0	0		0	0
9	6e-05	-0.00013	-6e-05	-0.00014	0	-3e-05	0.00013	-0.00014		8.3	0	0	0	0	0	0	0	0		9	0	0	0	0	0	0	0	0		0	0	0	0	0	0	0	0		0	0	0	0	0	0	0	0		0	0
9.2	1e-05	0.00012	-6e-05	-0.00019	0	-0.00023	8e-05	-0.00014		8.35	0	0	0	0	0	0	0	0		9.2	0	0	0	0	0	0	0	0		0	0	0	0	0	0	0	0		0	0	0	0	0	0	0	0		0	0
9.4	-0.00014	-3e-05	-0.00021	-0.00019	0	-8e-05	-0.00012	-9e-05		8.4	0	0	0	0	0	0	0	0		9.4	0	0	0	0	0	0	0	0		0	0	0	0	0	0	0	0		0	0	0	0	0	0	0	0		0	0
9.6	-4e-05	-8e-05	4e-05	-0.00019	-0.00015	-0.00013	-0.00012	-0.00014		8.45	0	0	0	0	0	0	0	0		9.6	0	0	0	0	0	0	0	0		0	0	0	0	0	0	0	0		0	0	0	0	0	0	0	0		0	0
9.8	-4e-05	-0.00018	-1e-05	-0.00024	0	-0.00013	-0.00012	-0.00019		8.5	0	0	0	0	0	0	0	0		9.8	0	0	0	0	0	0	0	0		0	0	0	0	0	0	0	0		0	0	0	0	0	0	0	0		0	0
10	1e-05	7e-05	-0.00021	-0.00019	-0.0002	-0.00013	-7e-05	-0.00014		8.55	0	0	0	0	0	0	0	0		10	0	0	0	0	0	0	0	0		0	0	0	0	0	0	0	0		0	0	0	0	0	0	0	0		0	0
10.2	-4e-05	-3e-05	9e-05	-0.00019	-0.0002	-8e-05	-7e-05	-0.00014		8.6	0	0	0	0	0	0	0	0		10.2	0	0	0	0	0	0	0	0		0	0	0	0	0	0	0	0		0	0	0	0	0	0	0	0		0	0.0145
10.4	-9e-05	-3e-05	-6e-05	-0.00024	5e-05	0.00027	-2e-05	-0.00019		8.65	0	0	0	0	0	0	0	0		10.4	0	0	0	0	0	0	0	0		0	0	0	0	0	0	0	0		0	0	0	0	0	0	0	0		0.0138	0.0205
10.6	0.00011	-0.00013	-0.00011	-0.00024	-0.0001	-0.00013	3e-05	-0.00014		8.7	0	0	0	0	0	0	0	0		10.6	0	0.0334	0	0	0	0	0	0		0	0	0	0	0	0	0	0		0	0	0	0	0	0	0	0		0.0198	0.0241
10.8	-9e-05	0.00012	4e-05	-0.00024	-0.00015	-8e-05	-2e-05	-0.00019		8.75	0	0	0	0	0	0	0	0		10.8	0.0096	0.0653	0	0	0	0	0	0		0.0389	0.0392	0	0	0	0	0	0		0	0.0405	0	0	0	0	0	0		0.0241	0.0269
11	-9e-05	0.01222	-6e-05	-0.00024	0.00015	2e-05	-2e-05	-0.00014		8.8	0	0	0	0	0	0	0	0		11	0.0345	0.0797	0	0	0	0	0	0		0.0567	0.0692	0	0	0	0	0	0		0.0276	0.0549	0	0	0	0	0	0		0.027	0.0292
11.2	0.00856	0.01177	-6e-05	-0.00034	0	-0.00013	-7e-05	-9e-05		8.85	0	0	0	0	0	0	0	0		11.2	0.0545	0.0709	0.0306	0	0	0	0	0		0.053	0.0745	0.0392	0	0	0	0	0		0.0409	0.078	0.0185	0	0	0	0	0		0.0293	0.0311
11.4	0.01061	0.01367	0.00559	-0.00024	-5e-05	-8e-05	8e-05	1e-05		8.9	0	0	0	0	0	0	0	0		11.4	0.0534	0.0773	0.0282	0	0	0	0	0		0.0514	0.0656	0.0278	0	0	0	0	0		0.0589	0.0797	0.0399	0	0	0	0	0		0.0313	0.0327
11.6	0.01181	0.02292	0.01494	-0.00024	-0.0002	2e-05	3e-05	0.00011		8.95	0	0	0	0	0	0	0	0		11.6	0.0553	0.0765	0.0297	0	0	0	0	0		0.0541	0.0651	0.0267	0	0	0	0	0		0.0618	0.0739	0.0405	0	0	0	0	0		0.033	0.034
11.8	0.01331	0.03092	0.01844	-0.00029	5e-05	-0.00023	-2e-05	0.00026		9	0	0	0	0	0	0	0	0		11.8	0.0563	0.0798	0.0322	0.0064	0	0.0362	0	0		0.0584	0.0729	0.0262	0.0166	0	0	0	0		0.0662	0.072	0.0402	0	0	0	0	0		0.0344	0.0352
12	0.01706	0.03382	0.01754	0.00066	0	0.00627	8e-05	0.00016		9.05	0	0	0	0	0	0	0	0		12	0.0628	0.0837	0.0387	0.0119	0	0.0328	0	0		0.062	0.0793	0.0339	0.0082	0	0.0346	0	0		0.0667	0.0711	0.0427	0.0169	0	0.036	0	0		0.0356	0.0363
12.2	0.01746	0.03642	0.01979	0.00136	-0.00015	0.01307	8e-05	0.00011		9.1	0	0	0	0	0	0	0	0		12.2	0.0642	0.081	0.0448	0.0298	0.0221	0.0365	0.0138	0		0.061	0.0812	0.0433	0.0278	0.0119	0.0315	0	0		0.0647	0.071	0.0478	0.0242	0	0.0379	0	0		0.0366	0.0372
12.4	0.02076	0.04367	0.02344	0.00266	0.0067	0.01547	0.00033	6e-05		9.15	0	0	0	0	0	0	0	0		12.4	0.0625	0.0802	0.0405	0.0321	0.0245	0.0451	0.0058	0		0.0631	0.0808	0.0442	0.0321	0.023	0.0388	0.0124	0		0.061	0.072	0.0495	0.0341	0.0296	0.0398	0.0167	0		0.0375	0.0381
12.6	0.02851	0.04817	0.02414	0.01246	0.0123	0.01622	0.00098	6e-05		9.2	0	0	0	0	0	0	0	0		12.6	0.0675	0.0844	0.0404	0.0305	0.0277	0.0471	0.0112	0		0.0631	0.0813	0.0437	0.0315	0.0259	0.0466	0.0083	0		0.0592	0.0737	0.0497	0.0333	0.0291	0.0449	0.0143	0		0.0383	0.0388
12.8	0.03826	0.06057	0.02669	0.01386	0.01965	0.01752	0.00308	1e-05		9.25	0	0	0	0	0	0	0	0		12.8	0.0689	0.0896	0.0408	0.0313	0.0314	0.0473	0.0274	0		0.0644	0.0834	0.0434	0.0309	0.0297	0.0464	0.0248	0		0.0575	0.0761	0.0503	0.0352	0.0277	0.0427	0.0305	0		0.0389	0.0394
13	0.04916	0.07412	0.02794	0.02156	0.02145	0.01862	0.00578	1e-05		9.3	0	0	0	0	0	0	0	0		13	0.0768	0.0877	0.0436	0.0319	0.0377	0.048	0.0312	0.0089		0.0678	0.0843	0.0436	0.0309	0.0341	0.0474	0.0301	0		0.0569	0.0783	0.05	0.0338	0.031	0.0427	0.0352	0		0.0395	0.04
13.2	0.06541	0.07367	0.02954	0.01996	0.0256	0.01972	0.01258	-0.00124		9.35	0	0	0	0	0	0	0	0		13.2	0.0716	0.0867	0.0422	0.0352	0.0334	0.0492	0.03	0.0201		0.0687	0.0861	0.0448	0.0332	0.0328	0.047	0.0288	0.0226		0.0586	0.0801	0.0497	0.0364	0.0339	0.0428	0.0323	0.0197		0.04	0.0405
13.4	0.08311	0.08617	0.03114	0.02486	0.02465	0.02162	0.01458	0.01201		9.4	0	0	0	0	0	0	0	0		13.4	0.0711	0.0882	0.0425	0.0413	0.038	0.0531	0.0305	0.022		0.0705	0.086	0.0448	0.0374	0.035	0.0487	0.0342	0.0208		0.062	0.079	0.0506	0.0381	0.033	0.0449	0.0382	0.0211		0.0405	0.0409
13.6	0.09356	0.10002	0.03409	0.02051	0.02425	0.02432	0.01683	0.01401		9.45	0	0	0	0	0	0	0	0		13.6	0.0716	0.088	0.0465	0.0399	0.0406	0.0537	0.0365	0.0216		0.07	0.0847	0.0454	0.0374	0.0349	0.0523	0.0333	0.022		0.0644	0.0808	0.0517	0.0382	0.0333	0.047	0.0413	0.0222		0.0409	0.0413
13.8	0.09211	0.11207	0.03734	0.02026	0.0322	0.03217	0.01813	0.01666		9.5	0	0	0	0	0	0	0	0		13.8	0.071	0.0881	0.047	0.0382	0.0383	0.0535	0.039	0.0207		0.069	0.0847	0.0485	0.0396	0.0346	0.0529	0.0369	0.0203		0.0659	0.0827	0.0533	0.0403	0.033	0.0482	0.039	0.0213		0.0413	0.0416
14	0.08721	0.10767	0.03649	0.02336	0.02875	0.03472	0.01658	0.01921		9.55	0	0	0	0	0	0	0	0		14	0.0688	0.0911	0.0474	0.041	0.0382	0.0548	0.0361	0.0217		0.0683	0.0858	0.0505	0.0412	0.0365	0.0538	0.0396	0.0209		0.0662	0.0838	0.0548	0.0408	0.0347	0.0493	0.0413	0.0212		0.0416	0.0419
14.2	0.08866	0.08122	0.03739	0.02111	0.032	0.03662	0.02648	0.01711		9.6	0	0	0	0	0	0	0	0		14.2	0.0717	0.0926	0.0494	0.0396	0.0387	0.0556	0.0364	0.022		0.0681	0.0868	0.0528	0.0418	0.037	0.0542	0.0397	0.0222		0.0663	0.0857	0.0561	0.0414	0.037	0.0505	0.042	0.0222		0.0418	0.0422
14.4	0.06751	0.05867	0.03899	0.02611	0.0382	0.03537	0.03343	0.01686		9.65	0	0	0	0	0	0	0	0		14.4	0.0755	0.0922	0.0489	0.0377	0.0412	0.0555	0.0371	0.0221		0.0683	0.0871	0.0537	0.0414	0.038	0.0548	0.0394	0.0227		0.0671	0.0873	0.0566	0.042	0.0384	0.0514	0.0425	0.0229		0.042	0.0424
14.6	0.07586	0.06127	0.03879	0.02996	0.04085	0.03697	0.02658	0.01986		9.7	0	0	0	0	0	0	0	0		14.6	0.0749	0.0918	0.0479	0.0399	0.0403	0.0576	0.0379	0.0218		0.071	0.087	0.0528	0.0416	0.0389	0.0553	0.0406	0.0226		0.0664	0.0863	0.0568	0.0426	0.0388	0.0527	0.043	0.0233		0.0422	0.0426
14.8	0.07081	0.06082	0.03624	0.02856	0.0364	0.04277	0.02558	0.02331		9.75	0	0	0	0	0	0	0	0		14.8	0.0746	0.0911	0.0472	0.0451	0.0424	0.0571	0.0423	0.0211		0.0739	0.0874	0.0524	0.0423	0.0397	0.0548	0.0418	0.0226		0.0672	0.0857	0.0573	0.043	0.0388	0.053	0.0435	0.0234		0.0423	0.0427
15	0.05986	0.06542	0.03179	0.03486	0.04535	0.05187	0.03303	0.02011		9.8	0	0	0	0	0	0	0	0		15	0.0751	0.0922	0.0481	0.0465	0.045	0.0566	0.0431	0.0209		0.0739	0.0882	0.0525	0.043	0.0405	0.0538	0.0425	0.0235		0.0671	0.0844	0.0581	0.0439	0.0393	0.054	0.0434	0.0234		0.0424	0.0427
15.2	0.05676	0.06552	0.03439	0.02776	0.04495	0.04847	0.03698	0.01876		9.85	0	0	0	0	0	0	0	0		15.2	0.0743	0.0953	0.0482	0.0455	0.0441	0.0558	0.0445	0.0226		0.0734	0.0876	0.0534	0.0442	0.041	0.0541	0.0433	0.0242		0.068	0.0845	0.0581	0.0443	0.0397	0.0543	0.0443	0.0237		0.0424	0.0427
15.4	0.05421	0.06997	0.03574	0.03796	0.0441	0.04777	0.03878	0.02191		9.9	0	0	0	0	0	0	0	0		15.4	0.0762	0.0944	0.0496	0.0453	0.0438	0.0557	0.0467	0.0244		0.073	0.0873	0.0554	0.0454	0.0415	0.0549	0.0452	0.0245		0.0689	0.0838	0.059	0.0447	0.0403	0.0543	0.0448	0.0242		0.0423	0.0426
15.6	0.05036	0.06872	0.03814	0.04091	0.0384	0.04587	0.03318	0.02261		9.95	0	0	0	0	0	0	0	0		15.6	0.0772	0.0941	0.0509	0.0459	0.043	0.0556	0.0472	0.0252		0.0727	0.0893	0.0563	0.0465	0.0421	0.0558	0.0468	0.0248		0.0687	0.0842	0.0583	0.0457	0.0409	0.0546	0.0453	0.0247		0.0422	0.0425
15.8	0.06066	0.07227	0.04424	0.03876	0.04365	0.04272	0.03988	0.02541		10	0	0	0	0	0	0	0	0		15.8	0.0771	0.0942	0.053	0.0454	0.0435	0.0575	0.0455	0.0258		0.0732	0.0894	0.0567	0.0469	0.0425	0.0562	0.0473	0.0255		0.0698	0.0853	0.0593	0.0465	0.0416	0.0548	0.0461	0.025		0.042	0.0422
16	0.06731	0.07332	0.03969	0.04041	0.0455	0.04337	0.03938	0.02546		10.05	0	0	0	0	0	0	0	0		16	0.0761	0.0943	0.0528	0.0468	0.0444	0.0578	0.0472	0.0262		0.0729	0.0884	0.0566	0.0474	0.0427	0.0561	0.047	0.0264		0.0699	0.0856	0.0603	0.0473	0.0423	0.0554	0.0469	0.0253		0.0417	0.042
16.2	0.06436	0.06372	0.04259	0.03921	0.0442	0.04602	0.04133	0.03281		10.1	0	0	0	0	0	0	0	0		16.2	0.0767	0.0926	0.0521	0.0486	0.0448	0.0589	0.0479	0.0259		0.0734	0.0868	0.0569	0.0475	0.0434	0.0562	0.0468	0.0265		0.0703	0.0849	0.0611	0.0481	0.0425	0.0563	0.0479	0.0258		0.0414	0.0417
16.4	0.06821	0.07677	0.04159	0.04831	0.0434	0.04847	0.03748	0.03076		10.15	0	0	0	0	0	0	0	0		16.4	0.0764	0.0914	0.0525	0.0493	0.045	0.0589	0.0485	0.0264		0.073	0.0852	0.057	0.0475	0.0441	0.0565	0.0475	0.0265		0.0702	0.0836	0.0612	0.0488	0.0429	0.0571	0.0487	0.0262		0.0411	0.0414
16.6	0.06966	0.08267	0.04069	0.04286	0.0529	0.05132	0.03973	0.02791		10.2	0	0	0	0	0	0	0	0		16.6	0.0742	0.0911	0.0513	0.0499	0.0457	0.0588	0.0478	0.0262		0.0722	0.0834	0.056	0.048	0.0442	0.0568	0.0485	0.0266		0.07	0.0817	0.0609	0.0494	0.0435	0.0576	0.0491	0.0265		0.0408	0.041
16.8	0.07811	0.07867	0.04249	0.04676	0.05315	0.04997	0.03463	0.02311		10.25	0	0	0	0	0	0	0	0		16.8	0.0746	0.091	0.0506	0.0492	0.0469	0.0582	0.048	0.0262		0.0706	0.0829	0.0552	0.0481	0.0442	0.0565	0.0494	0.0269		0.069	0.0787	0.0603	0.0493	0.0443	0.0575	0.0493	0.0268		0.0404	0.0406
17	0.08626	0.08157	0.03964	0.05101	0.0476	0.05247	0.04443	0.02456		10.3	0	0	0	0	0	0	0	0		17	0.0753	0.0887	0.0502	0.0473	0.0475	0.0575	0.0493	0.0262		0.0702	0.0829	0.0553	0.0482	0.0439	0.056	0.049	0.0271		0.068	0.0773	0.0591	0.049	0.0445	0.0571	0.0492	0.0271		0.04	0.0402
17.2	0.08441	0.08422	0.03949	0.04191	0.04965	0.04977	0.04223	0.02706		10.35	0	0	0	0	0	0	0	0		17.2	0.0734	0.0875	0.0497	0.0474	0.0465	0.0567	0.051	0.0263		0.0697	0.0825	0.0557	0.0479	0.0437	0.0555	0.0487	0.0272		0.067	0.0763	0.0585	0.0487	0.0444	0.0565	0.0489	0.0272		0.0396	0.0398
17.4	0.08701	0.08477	0.03994	0.04271	0.0484	0.05367	0.04253	0.02731		10.4	0	0.001	0	0	0	0	0	0		17.4	0.0726	0.0872	0.05	0.0479	0.0455	0.0566	0.0505	0.0267		0.0692	0.0818	0.0553	0.0479	0.0435	0.0554	0.0482	0.027		0.066	0.0748	0.0577	0.0481	0.044	0.0556	0.0484	0.027		0.0392	0.0394
17.6	0.07881	0.08287	0.03749	0.03821	0.04505	0.05327	0.04738	0.03041		10.45	0	0.003	0	0	0	0	0	0		17.6	0.0717	0.0868	0.0501	0.0484	0.0449	0.0558	0.0497	0.0267		0.0683	0.081	0.0552	0.0477	0.0433	0.0555	0.0482	0.0268		0.0651	0.0736	0.057	0.0477	0.0433	0.0548	0.0478	0.0268		0.0388	0.039
17.8	0.07731	0.08347	0.03819	0.04576	0.0425	0.05247	0.04328	0.03136		10.5	0	0.007	0	0	0	0	0	0		17.8	0.0709	0.0861	0.0496	0.0478	0.0439	0.0555	0.048	0.0271		0.0677	0.0808	0.0552	0.0474	0.0434	0.055	0.0485	0.0266		0.0642	0.0724	0.0564	0.0473	0.0428	0.0542	0.0472	0.0265		0.0383	0.0386
18	0.07666	0.08562	0.03779	0.04756	0.0511	0.05212	0.04523	0.02721		10.55	0	0.01	0	0	0	0	0	0		18	0.0688	0.0859	0.0501	0.0482	0.043	0.0551	0.0479	0.0281		0.0674	0.0808	0.0554	0.0474	0.0432	0.0548	0.0485	0.0265		0.0632	0.0709	0.0559	0.0469	0.0423	0.0536	0.0467	0.0263		0.0379	0.0382
18.2	0.07911	0.08342	0.03909	0.04761	0.051	0.05922	0.03873	0.02861		10.6	0	0.013	0	0	0	0	0	0		18.2	0.0685	0.0847	0.0507	0.0475	0.0431	0.0551	0.0487	0.0281		0.0675	0.0797	0.0549	0.0473	0.0429	0.055	0.0483	0.0265		0.0628	0.0697	0.0552	0.0464	0.0419	0.053	0.0463	0.0261		0.0375	0.0378
18.4	0.07806	0.07852	0.03529	0.04041	0.0569	0.05532	0.04853	0.02506		10.65	0	0.014	0	0	0	0	0	0		18.4	0.0691	0.0826	0.0502	0.0465	0.0431	0.0549	0.0493	0.0273		0.0674	0.0775	0.0541	0.0473	0.0426	0.0551	0.0481	0.0262		0.0618	0.0686	0.0542	0.046	0.0414	0.0525	0.0459	0.026		0.0371	0.0374
18.6	0.07841	0.07867	0.03644	0.05411	0.04695	0.05227	0.04578	0.02576		10.7	0.001	0.016	0	0	0	0	0	0		18.6	0.0689	0.082	0.049	0.0459	0.0428	0.0552	0.0493	0.0264		0.0665	0.0757	0.0532	0.047	0.0422	0.0548	0.0479	0.0261		0.0616	0.0673	0.0534	0.0455	0.041	0.052	0.0455	0.0259		0.0367	0.037
18.8	0.08076	0.08132	0.03479	0.04241	0.05105	0.05247	0.04353	0.02801		10.75	0.003	0.017	0	0	0	0	0	0		18.8	0.069	0.081	0.0484	0.0456	0.0434	0.0546	0.0489	0.0268		0.0659	0.0746	0.0529	0.0464	0.0423	0.0541	0.0475	0.0259		0.0616	0.0666	0.0529	0.045	0.0408	0.0514	0.0451	0.0258		0.0363	0.0366
19	0.07706	0.08272	0.03654	0.04636	0.0543	0.06187	0.04563	0.02926		10.8	0.007	0.018	0	0	0	0	0	0		19	0.068	0.0799	0.0483	0.0459	0.0443	0.0538	0.0479	0.027		0.0649	0.0734	0.0534	0.0461	0.0423	0.0534	0.0472	0.0257		0.0622	0.0661	0.0528	0.0444	0.0403	0.051	0.0447	0.0257		0.036	0.0362
19.2	0.07726	0.07862	0.03274	0.04636	0.0486	0.06807	0.05043	0.02821		10.85	0.01	0.019	0	0	0	0	0	0		19.2	0.0676	0.0792	0.049	0.0462	0.0443	0.0529	0.0477	0.0269		0.0641	0.0724	0.0534	0.0458	0.0421	0.0529	0.0469	0.0256		0.0622	0.0652	0.0526	0.044	0.04	0.0506	0.0442	0.0255		0.0356	0.0358
19.4	0.07906	0.07647	0.03329	0.03971	0.0493	0.05462	0.04203	0.02636		10.9	0.012	0.02	0	0	0	0	0	0		19.4	0.0673	0.0788	0.0486	0.0465	0.0434	0.0523	0.0475	0.0252		0.0643	0.072	0.0535	0.0456	0.0418	0.0526	0.0468	0.0255		0.0621	0.0637	0.0525	0.0439	0.0398	0.0504	0.0437	0.0253		0.0353	0.0355
19.6	0.07561	0.08287	0.03539	0.04016	0.054	0.04997	0.04878	0.02656		10.95	0.014	0.021	0	0	0	0	0	0		19.6	0.067	0.0779	0.0472	0.0469	0.0427	0.0515	0.0471	0.0229		0.0635	0.0717	0.0532	0.0457	0.0415	0.0521	0.0467	0.0254		0.0615	0.0629	0.0524	0.044	0.0398	0.0503	0.0434	0.0251		0.0349	0.0352
19.8	0.06921	0.08357	0.03439	0.05011	0.05205	0.05162	0.03913	0.02651		11	0.015	0.021	0	0	0	0	0	0		19.8	0.0663	0.0773	0.0479	0.047	0.0419	0.0516	0.0467	0.0231		0.0628	0.0717	0.0524	0.0455	0.0414	0.0517	0.0466	0.0253		0.0609	0.0625	0.0521	0.0439	0.0398	0.0502	0.0433	0.025		0.0346	0.0349
20	0.07251	0.07517	0.03359	0.04581	0.0475	0.06012	0.04643	0.02841		11.05	0.016	0.022	0	0	0	0	0	0		20	0.0658	0.0782	0.049	0.0462	0.0416	0.0518	0.0472	0.0263		0.0621	0.0714	0.0521	0.0449	0.0412	0.0511	0.0464	0.0253		0.0601	0.0615	0.0518	0.0435	0.0397	0.0498	0.0431	0.0251		0.0343	0.0346
20.2	0.07461	0.07322	0.03374	0.04361	0.04805	0.05912	0.04088	0.02961		11.1	0.018	0.023	0.001	0	0	0	0	0		20.2	0.0654	0.0777	0.0497	0.0454	0.0413	0.0522	0.0479	0.0264		0.0612	0.071	0.0517	0.0447	0.0409	0.0507	0.0462	0.0252		0.0598	0.0605	0.0515	0.0431	0.0393	0.0492	0.0429	0.0251		0.034	0.0343
20.4	0.07411	0.07272	0.03259	0.04481	0.04695	0.05577	0.04968	0.02836		11.15	0.019	0.024	0.005	0	0	0	0	0		20.4	0.0653	0.0762	0.0487	0.0444	0.0407	0.0532	0.0477	0.0239		0.0604	0.0711	0.0509	0.045	0.0406	0.0504	0.0461	0.025		0.0597	0.0597	0.0512	0.0427	0.039	0.0489	0.0425	0.025		0.0338	0.0341
20.6	0.07051	0.06922	0.03459	0.04176	0.0447	0.05437	0.04268	0.02691		11.2	0.02	0.027	0.009	0	0	0	0	0		20.6	0.0647	0.0758	0.0468	0.0441	0.0411	0.0528	0.0477	0.0249		0.0599	0.0716	0.0503	0.045	0.0403	0.0501	0.0458	0.0248		0.0593	0.0595	0.0508	0.0427	0.0389	0.0486	0.0422	0.0249		0.0335	0.0338
20.8	0.07006	0.07247	0.03779	0.04531	0.04605	0.05012	0.03968	0.02541		11.25	0.021	0.031	0.012	0	0	0	0	0		20.8	0.0641	0.0755	0.0456	0.0442	0.0414	0.0519	0.0471	0.0249		0.0595	0.0714	0.0497	0.0447	0.0399	0.0498	0.0454	0.0246		0.0588	0.0605	0.0508	0.0426	0.0388	0.0482	0.0421	0.0249		0.0333	0.0336
21	0.07141	0.06942	0.03589	0.04281	0.04915	0.04652	0.04328	0.02396		11.3	0.023	0.034	0.013	0	0	0	0	0		21	0.0639	0.0761	0.0456	0.045	0.0419	0.0505	0.0464	0.0247		0.0589	0.0708	0.0497	0.0438	0.0395	0.0497	0.0453	0.0245		0.0587	0.0617	0.0512	0.0425	0.0386	0.0478	0.042	0.0249		0.0331	0.0334
21.2	0.06961	0.07017	0.03404	0.04411	0.0502	0.05617	0.03663	0.02631		11.35	0.024	0.037	0.015	0	0	0	0	0		21.2	0.0631	0.0759	0.046	0.0456	0.042	0.0499	0.0456	0.0247		0.0583	0.0703	0.0498	0.043	0.039	0.05	0.0454	0.0244		0.0587	0.0618	0.0513	0.0423	0.0383	0.0478	0.0418	0.0248		0.0329	0.0332
21.4	0.06981	0.07657	0.03364	0.03941	0.05025	0.05207	0.04488	0.02836		11.4	0.025	0.041	0.016	0	0	0	0	0		21.4	0.0635	0.0753	0.046	0.0449	0.0412	0.0497	0.0455	0.0257		0.058	0.07	0.0496	0.0425	0.0385	0.0503	0.0452	0.0241		0.0586	0.0616	0.0511	0.0423	0.038	0.048	0.0416	0.0247		0.0327	0.033
21.6	0.07291	0.08447	0.03209	0.04501	0.04885	0.04987	0.04598	0.02801		11.45	0.026	0.044	0.017	0	0	0	0	0		21.6	0.0625	0.0745	0.0461	0.0442	0.0405	0.0498	0.046	0.0263		0.0582	0.07	0.049	0.0423	0.0383	0.0502	0.0451	0.0238		0.0583	0.0619	0.0511	0.0425	0.0379	0.0482	0.0416	0.0245		0.0325	0.0328
21.8	0.06981	0.07972	0.03409	0.04036	0.0446	0.05502	0.04103	0.02611		11.5	0.027	0.047	0.018	0	0	0	0	0		21.8	0.0617	0.0743	0.0458	0.044	0.0398	0.0507	0.0463	0.0232		0.0582	0.0698	0.0487	0.0424	0.0383	0.0497	0.0447	0.0235		0.058	0.0621	0.0511	0.0425	0.0379	0.0481	0.0416	0.0243		0.0323	0.0326
22	0.06906	0.07917	0.03089	0.04221	0.04585	0.05482	0.04388	0.02666		11.55	0.029	0.049	0.019	0	0	0	0	0		22	0.0616	0.0738	0.0456	0.0432	0.0396	0.0508	0.0465	0.0242		0.058	0.0691	0.0485	0.0422	0.0382	0.049	0.0442	0.0232		0.0579	0.0621	0.0511	0.0422	0.0378	0.0479	0.0417	0.0242		0.0321	0.0324
22.2	0.06761	0.07577	0.03069	0.03986	0.0501	0.05122	0.03768	0.02606		11.6	0.032	0.052	0.02	0	0	0	0	0		22.2	0.061	0.0732	0.0451	0.0425	0.0394	0.0504	0.0463	0.0258		0.0575	0.0685	0.0481	0.0419	0.0379	0.0484	0.0438	0.023		0.0584	0.0632	0.0509	0.0421	0.0376	0.0478	0.0417	0.0242		0.0319	0.0323
22.4	0.07041	0.07037	0.03219	0.04101	0.0436	0.04952	0.04458	0.03166		11.65	0.034	0.054	0.021	0	0	0	0	0		22.4	0.0603	0.0731	0.0442	0.0421	0.0392	0.0494	0.046	0.0272		0.0572	0.0679	0.0479	0.0416	0.0376	0.0481	0.0435	0.0228		0.0595	0.0646	0.0511	0.042	0.0375	0.0477	0.0417	0.0242		0.0318	0.0321
22.6	0.06881	0.07157	0.03089	0.04486	0.04545	0.05312	0.03978	0.02636		11.7	0.038	0.057	0.022	0	0	0	0	0		22.6	0.0603	0.0724	0.0436	0.0422	0.0394	0.0479	0.0452	0.0258		0.0569	0.0677	0.0477	0.0414	0.0372	0.0479	0.0433	0.0226		0.0603	0.0653	0.0516	0.0421	0.0376	0.0477	0.0418	0.0241		0.0316	0.0319
22.8	0.06726	0.07132	0.02999	0.03686	0.0454	0.05347	0.04093	0.02656		11.75	0.043	0.059	0.023	0	0	0	0	0		22.8	0.0601	0.0716	0.0434	0.0429	0.0392	0.0467	0.0442	0.0234		0.0567	0.0673	0.047	0.0413	0.0369	0.0477	0.0432	0.0224		0.0607	0.0653	0.0522	0.0424	0.0379	0.0479	0.0419	0.0241		0.0315	0.0318
23	0.06541	0.07512	0.03029	0.04761	0.0474	0.05477	0.03948	0.02391		11.8	0.046	0.06	0.024	0	0	0	0	0		23	0.0604	0.0708	0.0429	0.0427	0.0385	0.0468	0.0439	0.023		0.0564	0.0667	0.0467	0.0411	0.0366	0.0476	0.0431	0.0225		0.0603	0.0649	0.0526	0.043	0.0382	0.0486	0.0421	0.0242		0.0313	0.0316
23.2	0.06816	0.07192	0.03129	0.03671	0.0513	0.04967	0.04133	0.02721		11.85	0.049	0.062	0.025	0	0	0	0	0		23.2	0.0595	0.0704	0.0433	0.0427	0.038	0.0474	0.0444	0.0251		0.0564	0.0663	0.0466	0.0407	0.0364	0.0475	0.043	0.0225		0.0593	0.0648	0.0523	0.0435	0.0387	0.0494	0.0425	0.0243		0.0312	0.0315
23.4	0.06706	0.07177	0.03264	0.04291	0.04185	0.05122	0.04348	0.02741		11.9	0.05	0.063	0.025	0	0	0	0	0		23.4	0.0589	0.0704	0.0442	0.0423	0.0377	0.0486	0.0447	0.0261		0.0564	0.0662	0.0468	0.0404	0.0362	0.0475	0.0428	0.0223		0.0586	0.0666	0.0518	0.0434	0.0388	0.0495	0.043	0.0244		0.031	0.0313
23.6	0.06556	0.07472	0.03154	0.04106	0.04105	0.04547	0.03843	0.02836		11.95	0.051	0.064	0.025	0	0	0	0	0		23.6	0.0585	0.0699	0.045	0.0416	0.0377	0.0495	0.0442	0.0223		0.0564	0.0662	0.0469	0.0401	0.0361	0.0475	0.0427	0.0221		0.0596	0.0681	0.0521	0.0429	0.0385	0.0491	0.043	0.0246		0.0309	0.0312
23.8	0.06931	0.07867	0.03239	0.03876	0.0415	0.04672	0.04058	0.02721		12	0.052	0.065	0.026	0.001	0	0	0	0		23.8	0.0587	0.0695	0.0446	0.0409	0.0379	0.0501	0.0439	0.023		0.056	0.0661	0.0467	0.0401	0.0359	0.0474	0.0426	0.0219		0.0609	0.0685	0.0525	0.0422	0.0381	0.0486	0.0426	0.0246		0.0307	0.0311
24	0.06516	0.07277	0.03154	0.04006	0.04555	0.04922	0.03828	0.02461		12.05	0.052	0.065	0.026	0.002	0	0.002	0	0		24	0.0584	0.069	0.0432	0.0406	0.0383	0.0496	0.0439	0.0247		0.0556	0.0657	0.0466	0.0402	0.0359	0.0472	0.0425	0.0218		0.0616	0.0684	0.0525	0.0424	0.0377	0.0488	0.042	0.0245		0.0306	0.0309
24.2	0.06541	0.06802	0.03074	0.03906	0.0509	0.04892	0.04143	0.02436		12.1	0.052	0.066	0.027	0.004	0	0.006	0	0		24.2	0.0578	0.0686	0.0423	0.0404	0.038	0.0483	0.0437	0.0241		0.0552	0.065	0.0465	0.0402	0.0357	0.0469	0.0422	0.0217		0.0617	0.0682	0.0529	0.0432	0.0382	0.0495	0.0419	0.0242		0.0305	0.0308
24.4	0.06706	0.07067	0.03139	0.03961	0.04015	0.04947	0.04038	0.02646		12.15	0.052	0.066	0.026	0.005	0	0.008	0	0		24.4	0.0579	0.0682	0.0422	0.0406	0.0377	0.0463	0.043	0.0194		0.0554	0.0648	0.0465	0.04	0.0357	0.0465	0.0418	0.0216		0.0612	0.068	0.0532	0.044	0.0391	0.0499	0.0424	0.0241		0.0303	0.0307
24.6	0.06921	0.06927	0.03174	0.04081	0.04155	0.04947	0.03693	0.02791		12.2	0.053	0.067	0.027	0.007	0	0.01	0	0		24.6	0.0583	0.0683	0.0432	0.0413	0.0373	0.0446	0.0422	0.0193		0.0557	0.0648	0.0463	0.0399	0.0356	0.0462	0.0416	0.0216		0.0603	0.0682	0.0534	0.0441	0.0395	0.05	0.0432	0.0244		0.0302	0.0305
24.8	0.06461	0.07117	0.03129	0.03836	0.03905	0.04907	0.04058	0.02486		12.25	0.053	0.067	0.027	0.008	0.001	0.012	0	0		24.8	0.0577	0.0678	0.0435	0.0411	0.0369	0.0438	0.0416	0.0222		0.0552	0.0647	0.0461	0.0397	0.0354	0.046	0.0416	0.0215		0.0595	0.0681	0.0532	0.044	0.0393	0.0502	0.0436	0.0249		0.0301	0.0304
25	0.06586	0.06962	0.03109	0.03606	0.04335	0.04432	0.04208	0.02516		12.3	0.053	0.068	0.028	0.009	0.004	0.013	0	0		25	0.0574	0.0668	0.0426	0.0408	0.0365	0.0441	0.0417	0.0243		0.0544	0.0643	0.0459	0.0396	0.0353	0.0461	0.0417	0.0215		0.0591	0.0674	0.0528	0.0436	0.0387	0.0502	0.0437	0.025		0.03	0.0303
25.2	0.06271	0.06442	0.03309	0.03996	0.04475	0.04727	0.03873	0.02496		12.35	0.054	0.068	0.028	0.01	0.007	0.015	0	0		25.2	0.0571	0.0669	0.0429	0.0403	0.0364	0.0458	0.0431	0.0232		0.0537	0.0639	0.0459	0.0395	0.0351	0.0464	0.0418	0.0214		0.0592	0.0664	0.0522	0.0432	0.0382	0.05	0.0435	0.0249		0.0298	0.0302
25.4	0.06366	0.06572	0.03154	0.03616	0.0414	0.05037	0.03878	0.02496		12.4	0.054	0.069	0.028	0.013	0.009	0.016	0	0		25.4	0.057	0.0672	0.0434	0.0398	0.0362	0.0475	0.0439	0.0217		0.0537	0.0639	0.0462	0.0395	0.0352	0.0466	0.0418	0.0214		0.0592	0.0654	0.0516	0.043	0.0382	0.0497	0.043	0.0246		0.0297	0.0301
25.6	0.06291	0.06462	0.03019	0.03946	0.04295	0.04717	0.04038	0.02716		12.45	0.055	0.069	0.029	0.017	0.01	0.018	0	0		25.6	0.057	0.0662	0.0432	0.0394	0.0361	0.0483	0.043	0.0228		0.0537	0.0636	0.0462	0.0394	0.0352	0.0466	0.0416	0.0213		0.0589	0.0645	0.0513	0.0431	0.0384	0.0493	0.0429	0.0245		0.0296	0.0299
25.8	0.06586	0.06857	0.03134	0.03446	0.0444	0.04312	0.03753	0.02371		12.5	0.055	0.07	0.03	0.02	0.012	0.019	0	0		25.8	0.0569	0.0657	0.0431	0.0393	0.0365	0.0482	0.0417	0.0242		0.0536	0.063	0.0455	0.0391	0.035	0.0461	0.0414	0.0213		0.0586	0.064	0.0515	0.0429	0.0385	0.0489	0.0428	0.0245		0.0295	0.0298
26	0.06616	0.06957	0.03199	0.03601	0.0384	0.04022	0.03778	0.02631		12.55	0.056	0.07	0.031	0.022	0.013	0.02	0	0		26	0.0566	0.0658	0.0425	0.0394	0.0371	0.0471	0.0412	0.0238		0.0537	0.0624	0.0448	0.0391	0.0346	0.0455	0.041	0.0213		0.0578	0.0645	0.0518	0.0428	0.0384	0.0486	0.0427	0.0244		0.0294	0.0297
26.2	0.06071	0.06967	0.03084	0.03621	0.03635	0.04492	0.03953	0.02496		12.6	0.056	0.071	0.031	0.022	0.014	0.021	0.001	0		26.2	0.0564	0.0657	0.0427	0.0392	0.0369	0.046	0.0412	0.0196		0.0536	0.062	0.0448	0.0388	0.0344	0.045	0.0407	0.0211		0.0565	0.0649	0.0519	0.0429	0.0383	0.0485	0.0426	0.0243		0.0293	0.0296
26.4	0.06276	0.07107	0.03059	0.03476	0.0376	0.04987	0.03623	0.02441		12.65	0.057	0.071	0.032	0.023	0.015	0.023	0.002	0		26.4	0.0569	0.0647	0.0424	0.0395	0.0364	0.0447	0.0415	0.021		0.0535	0.0617	0.0451	0.0384	0.0344	0.0447	0.0405	0.0209		0.0554	0.0641	0.0517	0.0429	0.0381	0.0484	0.0427	0.0242		0.0292	0.0295
26.6	0.06461	0.06337	0.03094	0.03766	0.0405	0.04397	0.03733	0.02451		12.7	0.057	0.071	0.032	0.024	0.016	0.024	0.003	0		26.6	0.0566	0.0646	0.0416	0.0403	0.036	0.0439	0.0418	0.0241		0.0533	0.0618	0.0451	0.0382	0.0342	0.0448	0.0404	0.0208		0.0545	0.0632	0.0511	0.0428	0.0378	0.0484	0.0426	0.0241		0.0291	0.0294
26.8	0.06291	0.06372	0.02989	0.03656	0.047	0.04287	0.03568	0.02191		12.75	0.058	0.072	0.033	0.025	0.016	0.025	0.004	0		26.8	0.0562	0.0652	0.0414	0.0406	0.0357	0.0437	0.0414	0.0231		0.0534	0.0618	0.045	0.0381	0.0341	0.045	0.0405	0.0208		0.0539	0.0623	0.0506	0.0421	0.0372	0.0482	0.0424	0.024		0.029	0.0293
27	0.05966	0.06822	0.03214	0.03841	0.0413	0.04377	0.03543	0.02221		12.8	0.058	0.072	0.034	0.026	0.017	0.026	0.004	0		27	0.0561	0.0654	0.0422	0.0401	0.0358	0.0436	0.0409	0.0231		0.0534	0.0617	0.0448	0.0381	0.034	0.0451	0.0405	0.0208		0.0533	0.0615	0.0499	0.0412	0.0365	0.0476	0.042	0.0239		0.0289	0.0292
27.2	0.06446	0.06877	0.02984	0.03771	0.0394	0.04657	0.03998	0.02356		12.85	0.059	0.072	0.034	0.026	0.017	0.026	0.005	0		27.2	0.0561	0.0649	0.0428	0.0397	0.0357	0.0445	0.0412	0.0197		0.0534	0.0613	0.0447	0.038	0.0339	0.0451	0.0404	0.0207		0.0528	0.0609	0.0492	0.0405	0.036	0.0469	0.0413	0.0236		0.0288	0.0291
27.4	0.06561	0.06682	0.03174	0.03806	0.03765	0.04262	0.03428	0.02361		12.9	0.059	0.072	0.035	0.028	0.018	0.027	0.005	0		27.4	0.0563	0.065	0.0427	0.0391	0.0355	0.0457	0.0416	0.0239		0.0532	0.0611	0.0448	0.038	0.034	0.045	0.0402	0.0207		0.0525	0.0606	0.0486	0.0401	0.0356	0.0463	0.0407	0.0232		0.0286	0.029
27.6	0.06211	0.07087	0.03374	0.03861	0.0442	0.04192	0.04008	0.02441		12.95	0.06	0.073	0.035	0.029	0.018	0.027	0.006	0		27.6	0.0562	0.0647	0.0423	0.0386	0.0353	0.0465	0.0418	0.0235		0.0533	0.0612	0.0448	0.0381	0.034	0.0447	0.04	0.0206		0.0522	0.0603	0.0484	0.0396	0.0354	0.0458	0.0401	0.0228		0.0285	0.0289
27.8	0.06216	0.06657	0.02934	0.03636	0.0425	0.04047	0.03368	0.02471		13	0.06	0.073	0.036	0.03	0.019	0.028	0.006	0		27.8	0.056	0.0643	0.042	0.0387	0.0354	0.0465	0.0417	0.02		0.0533	0.061	0.0447	0.0383	0.0342	0.0445	0.0399	0.0206		0.052	0.0598	0.0484	0.0392	0.0351	0.0456	0.0397	0.0225		0.0284	0.0288
28	0.06066	0.06622	0.03049	0.03886	0.04095	0.04487	0.03913	0.02276		13.05	0.06	0.073	0.037	0.031	0.019	0.028	0.008	0		28	0.0559	0.0637	0.0419	0.0391	0.0358	0.046	0.0413	0.0213		0.0528	0.0606	0.0446	0.0383	0.0342	0.0443	0.0399	0.0205		0.0521	0.0593	0.0483	0.0389	0.0347	0.0453	0.0394	0.0223		0.0283	0.0287
28.2	0.06221	0.06537	0.03129	0.03481	0.03705	0.04502	0.03293	0.02611		13.1	0.061	0.074	0.037	0.031	0.02	0.029	0.01	0		28.2	0.0556	0.0636	0.0419	0.0392	0.0359	0.0451	0.0409	0.024		0.0525	0.0602	0.0445	0.0381	0.034	0.0442	0.0399	0.0206		0.0522	0.0587	0.0481	0.0388	0.0344	0.0451	0.0392	0.0221		0.0282	0.0286
28.4	0.06071	0.06457	0.03234	0.03716	0.03525	0.04107	0.04073	0.02276		13.15	0.061	0.074	0.037	0.032	0.021	0.029	0.013	0		28.4	0.0552	0.0634	0.0415	0.0391	0.0359	0.0444	0.0407	0.0256		0.0523	0.06	0.0445	0.0378	0.0338	0.0443	0.0399	0.0206		0.052	0.0582	0.0478	0.0387	0.0342	0.0448	0.039	0.0219		0.0281	0.0285
28.6	0.06111	0.06277	0.03239	0.03946	0.0409	0.04297	0.03578	0.02521		13.2	0.061	0.075	0.038	0.032	0.022	0.03	0.015	0		28.6	0.055	0.0629	0.0414	0.0394	0.0356	0.0437	0.0408	0.0234		0.0524	0.0599	0.0444	0.0377	0.0337	0.0443	0.0398	0.0206		0.0514	0.0581	0.0475	0.0387	0.0342	0.0446	0.0388	0.0217		0.028	0.0284
28.8	0.06111	0.05982	0.02999	0.03326	0.0371	0.04502	0.03608	0.02321		13.25	0.062	0.075	0.039	0.032	0.023	0.03	0.017	0.001		28.8	0.055	0.0633	0.0411	0.0393	0.0354	0.0434	0.0409	0.0185		0.0524	0.0597	0.0441	0.0378	0.0336	0.0443	0.0398	0.0206		0.0508	0.0581	0.0473	0.0386	0.0342	0.0443	0.0387	0.0217		0.0279	0.0283
29	0.06246	0.06117	0.02999	0.03876	0.03765	0.04407	0.03348	0.02311		13.3	0.062	0.075	0.039	0.032	0.023	0.031	0.018	0.003		29	0.0549	0.0632	0.0412	0.0391	0.0352	0.0437	0.0408	0.0205		0.0522	0.0594	0.0438	0.0376	0.0337	0.0442	0.0398	0.0206		0.0503	0.0578	0.0471	0.0385	0.0341	0.044	0.0386	0.0216		0.0278	0.0282
29.2	0.05706	0.06727	0.03174	0.03406	0.0342	0.04207	0.03653	0.02496		13.35	0.062	0.076	0.04	0.033	0.024	0.031	0.019	0.005		29.2	0.0553	0.0626	0.0417	0.0387	0.0349	0.0441	0.0406	0.0241		0.052	0.0592	0.0438	0.0375	0.0336	0.044	0.0397	0.0206		0.05	0.0571	0.0467	0.0383	0.0338	0.0437	0.0385	0.0216		0.0277	0.0281
29.4	0.06121	0.06727	0.02949	0.03786	0.0358	0.04107	0.03613	0.02216		13.4	0.063	0.076	0.041	0.033	0.024	0.032	0.02	0.007		29.4	0.0549	0.0626	0.0417	0.0383	0.0348	0.0445	0.0406	0.0244		0.0519	0.0593	0.0439	0.0373	0.0335	0.0438	0.0395	0.0206		0.0496	0.0567	0.0464	0.0379	0.0334	0.0435	0.0383	0.0215		0.0276	0.028
29.6	0.05911	0.06512	0.03379	0.03436	0.0394	0.04022	0.03458	0.02436		13.45	0.063	0.076	0.041	0.034	0.024	0.032	0.021	0.009		29.6	0.0547	0.0628	0.0416	0.038	0.0346	0.045	0.0406	0.021		0.0519	0.0595	0.0441	0.0373	0.0334	0.0436	0.0393	0.0204		0.0493	0.0568	0.0459	0.0375	0.033	0.0431	0.038	0.0214		0.0275	0.0279
29.8	0.06011	0.06682	0.03284	0.03486	0.0406	0.04437	0.03343	0.02131		13.5	0.063	0.076	0.043	0.034	0.025	0.032	0.022	0.009		29.8	0.0545	0.0625	0.0416	0.0379	0.0349	0.0449	0.0409	0.0216		0.0517	0.0592	0.0439	0.0374	0.0334	0.0436	0.0391	0.0203		0.049	0.0569	0.0455	0.0371	0.0326	0.0428	0.0376	0.0212		0.0274	0.0278
30	0.05966	0.07052	0.02889	0.03951	0.04505	0.04197	0.03393	0.02361		13.55	0.063	0.077	0.043	0.034	0.025	0.033	0.023	0.01		30	0.0548	0.0622	0.0414	0.0382	0.0348	0.0446	0.0408	0.0236		0.0512	0.0589	0.0435	0.0374	0.0333	0.0435	0.0391	0.0203		0.0489	0.0564	0.0454	0.0368	0.0324	0.0425	0.0373	0.021		0.0273	0.0277
30.2	0.06161	0.07612	0.02794	0.03181	0.04165	0.03877	0.03548	0.02586		13.6	0.064	0.077	0.044	0.035	0.026	0.033	0.024	0.011		30.2	0.0543	0.0615	0.041	0.0386	0.0348	0.0443	0.0405	0.0247		0.051	0.0585	0.0434	0.0371	0.0333	0.0435	0.0391	0.0203		0.0489	0.056	0.0451	0.0366	0.0323	0.0424	0.037	0.0209		0.0272	0.0276
30.4	0.06101	0.06772	0.03264	0.03846	0.03925	0.04107	0.03428	0.02436		13.65	0.064	0.077	0.045	0.035	0.027	0.033	0.025	0.012		30.4	0.0541	0.0611	0.041	0.0384	0.0349	0.0439	0.0401	0.0199		0.0507	0.058	0.0435	0.0369	0.0331	0.0434	0.0391	0.0204		0.0486	0.0564	0.0447	0.0364	0.0321	0.0424	0.0368	0.0208		0.0271	0.0275
30.6	0.05826	0.07232	0.03029	0.03391	0.041	0.04182	0.04083	0.02356		13.7	0.064	0.078	0.045	0.036	0.027	0.033	0.026	0.012		30.6	0.0541	0.0608	0.0409	0.0382	0.0349	0.0435	0.0399	0.0206		0.0503	0.0577	0.0433	0.0367	0.033	0.0433	0.039	0.0204		0.0482	0.0561	0.0446	0.0363	0.0319	0.0423	0.0367	0.0207		0.027	0.0274
30.8	0.06001	0.07132	0.03089	0.03396	0.03875	0.04072	0.02983	0.02346		13.75	0.065	0.078	0.046	0.036	0.027	0.034	0.026	0.013		30.8	0.0539	0.0607	0.0409	0.038	0.0348	0.0432	0.0402	0.0221		0.0503	0.0575	0.0429	0.0367	0.0329	0.0432	0.0388	0.0203		0.0482	0.0552	0.0447	0.0361	0.0318	0.0421	0.0366	0.0206		0.0269	0.0273
31	0.05866	0.07052	0.02904	0.03381	0.03685	0.04342	0.03828	0.02376		13.8	0.065	0.078	0.047	0.036	0.028	0.034	0.027	0.014		31	0.0536	0.0602	0.0408	0.0376	0.0345	0.0431	0.0402	0.0219		0.0503	0.0574	0.0425	0.0367	0.0328	0.043	0.0387	0.0202		0.0482	0.0552	0.0442	0.036	0.0317	0.042	0.0364	0.0205		0.0268	0.0272
31.2	0.05781	0.07362	0.02839	0.03061	0.0382	0.04752	0.02913	0.02351		13.85	0.066	0.078	0.048	0.037	0.028	0.035	0.027	0.015		31.2	0.0536	0.0602	0.0406	0.0378	0.0343	0.0432	0.0401	0.0226		0.0502	0.0572	0.0424	0.0364	0.0327	0.0427	0.0386	0.0202		0.0477	0.0555	0.0438	0.0359	0.0316	0.042	0.0363	0.0204		0.0267	0.0271
31.4	0.05936	0.07617	0.02894	0.03806	0.0407	0.04087	0.03713	0.02391		13.9	0.066	0.078	0.048	0.037	0.029	0.035	0.028	0.015		31.4	0.0536	0.0604	0.0407	0.0376	0.0342	0.0433	0.0399	0.02		0.0501	0.0568	0.0423	0.0362	0.0325	0.0424	0.0384	0.0201		0.0474	0.0556	0.0438	0.0357	0.0314	0.0417	0.0362	0.0204		0.0266	0.027
31.6	0.05861	0.06992	0.02784	0.03126	0.04035	0.03712	0.03233	0.02171		13.95	0.066	0.079	0.048	0.038	0.029	0.036	0.028	0.016		31.6	0.0537	0.0598	0.041	0.0376	0.034	0.0431	0.0397	0.0222		0.0499	0.0565	0.0424	0.036	0.0323	0.0423	0.0382	0.0201		0.0475	0.0552	0.0438	0.0355	0.0313	0.0413	0.0361	0.0203		0.0265	0.0269
31.8	0.05646	0.07137	0.02949	0.03446	0.04045	0.03722	0.02918	0.02281		14	0.067	0.079	0.049	0.038	0.03	0.036	0.029	0.017		31.8	0.0533	0.0594	0.0408	0.0375	0.0339	0.0431	0.0396	0.0248		0.0495	0.0563	0.0422	0.036	0.0322	0.0423	0.038	0.0199		0.0474	0.055	0.0436	0.0354	0.0311	0.0413	0.0358	0.0202		0.0264	0.0268
32	0.05936	0.07292	0.02984	0.03631	0.03635	0.04052	0.03813	0.02256		14.05	0.067	0.079	0.05	0.038	0.031	0.038	0.029	0.017		32	0.0529	0.0595	0.0407	0.0375	0.0341	0.0432	0.0397	0.0219		0.0492	0.0562	0.0419	0.0361	0.0322	0.0422	0.038	0.0198		0.0471	0.0549	0.0434	0.0352	0.0309	0.0413	0.0357	0.0202		0.0263	0.0267
32.2	0.05726	0.06657	0.02979	0.03276	0.03975	0.04292	0.03138	0.02606		14.1	0.067	0.079	0.05	0.038	0.031	0.038	0.029	0.017		32.2	0.0524	0.0591	0.0407	0.0374	0.0343	0.043	0.0399	0.0188		0.0487	0.0561	0.0417	0.036	0.0322	0.0421	0.0381	0.0198		0.0468	0.0546	0.0433	0.0351	0.0308	0.0412	0.0356	0.0201		0.0262	0.0266
32.4	0.05766	0.06392	0.02984	0.03556	0.0365	0.04242	0.03693	0.02411		14.15	0.068	0.08	0.051	0.039	0.032	0.039	0.03	0.018		32.4	0.0524	0.0587	0.0407	0.0373	0.0344	0.0426	0.0398	0.0217		0.0484	0.056	0.0416	0.0358	0.032	0.0419	0.038	0.0198		0.0465	0.0543	0.043	0.035	0.0307	0.041	0.0355	0.0199		0.0261	0.0265
32.6	0.05781	0.06422	0.03064	0.03301	0.039	0.03887	0.03263	0.02371		14.2	0.068	0.08	0.051	0.039	0.032	0.039	0.03	0.018		32.6	0.0518	0.0585	0.0402	0.0374	0.0342	0.0425	0.0396	0.0236		0.0483	0.0558	0.0416	0.0355	0.0318	0.0417	0.0379	0.0198		0.0462	0.054	0.0427	0.0348	0.0306	0.0409	0.0354	0.0199		0.026	0.0264
32.8	0.05606	0.06102	0.03024	0.03281	0.0426	0.03952	0.03323	0.02281		14.25	0.068	0.08	0.051	0.039	0.032	0.039	0.03	0.019		32.8	0.0517	0.0583	0.0399	0.0375	0.0341	0.0424	0.0393	0.0245		0.0482	0.0554	0.0415	0.0353	0.0316	0.0416	0.0376	0.0197		0.0459	0.0537	0.0425	0.0345	0.0304	0.0407	0.0352	0.0198		0.0259	0.0263
33	0.05911	0.05952	0.03084	0.03396	0.0392	0.03977	0.03233	0.02136		14.3	0.069	0.08	0.052	0.04	0.033	0.04	0.031	0.019		33	0.0514	0.0582	0.0396	0.0371	0.0338	0.0422	0.039	0.0218		0.048	0.055	0.0412	0.0352	0.0314	0.0415	0.0373	0.0196		0.0457	0.0535	0.0423	0.0343	0.0302	0.0404	0.0351	0.0198		0.0258	0.0262
33.2	0.05706	0.05987	0.02869	0.03316	0.0393	0.04342	0.03408	0.02596		14.35	0.069	0.08	0.052	0.04	0.033	0.04	0.031	0.019		33.2	0.0513	0.0582	0.0393	0.0368	0.0336	0.042	0.0389	0.0201		0.0479	0.0549	0.0407	0.0353	0.0313	0.0414	0.0372	0.0194		0.0454	0.0533	0.0421	0.034	0.03	0.0402	0.0349	0.0197		0.0258	0.0261
33.4	0.05566	0.05787	0.02819	0.03431	0.0389	0.03677	0.03443	0.02316		14.4	0.069	0.08	0.053	0.04	0.033	0.041	0.032	0.02		33.4	0.0513	0.0583	0.0392	0.0368	0.0335	0.0417	0.039	0.0227		0.0477	0.0549	0.0405	0.0351	0.0313	0.0412	0.0372	0.0194		0.0452	0.0532	0.0419	0.0338	0.0298	0.0401	0.0347	0.0196		0.0257	0.026
33.6	0.05606	0.05802	0.02864	0.02896	0.0377	0.04067	0.03203	0.02311		14.45	0.07	0.081	0.053	0.041	0.034	0.041	0.032	0.02		33.6	0.0508	0.058	0.039	0.0368	0.0334	0.0415	0.039	0.0241		0.0476	0.0549	0.0407	0.0348	0.0312	0.0409	0.0371	0.0193		0.0451	0.0531	0.0418	0.0336	0.0296	0.0399	0.0345	0.0195		0.0256	0.026
33.8	0.05616	0.05917	0.02969	0.03311	0.0391	0.03682	0.03008	0.02276		14.5	0.07	0.081	0.053	0.041	0.034	0.041	0.033	0.02		33.8	0.0509	0.0578	0.039	0.0368	0.0332	0.0416	0.0388	0.0229		0.0475	0.0546	0.0409	0.0346	0.0309	0.0408	0.0369	0.0193		0.045	0.0529	0.0417	0.0335	0.0295	0.0398	0.0343	0.0193		0.0255	0.0259
34	0.05671	0.06047	0.03054	0.03286	0.0429	0.03922	0.03838	0.02316		14.55	0.07	0.081	0.053	0.041	0.034	0.042	0.033	0.021		34	0.0505	0.0574	0.0386	0.0366	0.033	0.0415	0.0386	0.0206		0.0472	0.0544	0.0408	0.0345	0.0307	0.0408	0.0368	0.0192		0.0448	0.0526	0.0415	0.0334	0.0293	0.0397	0.0342	0.0192		0.0254	0.0258
34.2	0.05486	0.05972	0.02864	0.03146	0.0395	0.03892	0.02863	0.02171		14.6	0.07	0.081	0.053	0.042	0.035	0.042	0.034	0.021		34.2	0.0503	0.057	0.0386	0.0364	0.033	0.0416	0.0383	0.0213		0.0471	0.0542	0.0403	0.0345	0.0306	0.0408	0.0366	0.019		0.0446	0.0523	0.0414	0.0333	0.0292	0.0396	0.0341	0.0192		0.0253	0.0257
34.4	0.05591	0.05852	0.02769	0.03331	0.0366	0.03942	0.03468	0.02446		14.65	0.071	0.081	0.054	0.043	0.035	0.042	0.034	0.021		34.4	0.0502	0.0566	0.0385	0.0363	0.033	0.0414	0.0384	0.0216		0.0471	0.0539	0.0399	0.0346	0.0306	0.0408	0.0365	0.0189		0.0444	0.052	0.0412	0.0332	0.0291	0.0394	0.034	0.0191		0.0252	0.0256
34.6	0.05341	0.05747	0.02889	0.03051	0.03725	0.04417	0.03183	0.02241		14.7	0.071	0.082	0.054	0.043	0.035	0.042	0.035	0.021		34.6	0.0498	0.0563	0.0385	0.0363	0.033	0.0411	0.0384	0.0228		0.0468	0.0537	0.0398	0.0344	0.0306	0.0405	0.0365	0.0189		0.0442	0.0516	0.0411	0.033	0.029	0.0393	0.0339	0.019		0.0251	0.0255
34.8	0.05356	0.05652	0.02864	0.03361	0.0397	0.03727	0.03123	0.02036		14.75	0.071	0.082	0.055	0.044	0.036	0.043	0.035	0.022		34.8	0.0497	0.0558	0.0386	0.0363	0.0329	0.0408	0.0384	0.0246		0.0464	0.0533	0.0399	0.0341	0.0305	0.0402	0.0364	0.0189		0.0439	0.0513	0.0409	0.0329	0.0289	0.0392	0.0338	0.019		0.025	0.0253
35	0.05476	0.05482	0.02704	0.02651	0.04025	0.03922	0.03588	0.02171		14.8	0.072	0.082	0.055	0.044	0.036	0.042	0.036	0.022		35	0.0493	0.056	0.0383	0.0361	0.0327	0.0407	0.0382	0.0238		0.0461	0.0529	0.0399	0.0339	0.0303	0.0401	0.0362	0.0189		0.0437	0.0511	0.0407	0.0328	0.0288	0.039	0.0337	0.0189		0.0248	0.0252
35.2	0.05366	0.05547	0.02954	0.03546	0.0382	0.03662	0.02703	0.02286		14.85	0.072	0.082	0.055	0.044	0.036	0.043	0.036	0.022		35.2	0.049	0.0554	0.038	0.0359	0.0324	0.0406	0.038	0.0199		0.046	0.0527	0.0397	0.0338	0.0301	0.04	0.036	0.0188		0.0435	0.0507	0.0405	0.0326	0.0286	0.0388	0.0335	0.0188		0.0247	0.0251
35.4	0.05456	0.05482	0.03084	0.03031	0.04155	0.03972	0.03533	0.02326		14.9	0.072	0.082	0.056	0.044	0.037	0.043	0.036	0.022		35.4	0.0494	0.0553	0.038	0.0358	0.0322	0.0406	0.0378	0.0222		0.046	0.0527	0.0395	0.0338	0.03	0.04	0.0359	0.0187		0.0433	0.0504	0.0403	0.0324	0.0285	0.0386	0.0334	0.0188		0.0246	0.025
35.6	0.05421	0.05647	0.03009	0.03031	0.03455	0.03802	0.03248	0.02221		14.95	0.072	0.082	0.056	0.044	0.037	0.044	0.037	0.023		35.6	0.049	0.0551	0.0372	0.0356	0.0322	0.0404	0.0376	0.023		0.0459	0.0524	0.0391	0.0337	0.03	0.0398	0.0358	0.0186		0.0431	0.0501	0.0401	0.0322	0.0283	0.0384	0.0332	0.0187		0.0245	0.0248
35.8	0.05401	0.05667	0.02969	0.03036	0.0313	0.04117	0.03283	0.01891		15	0.072	0.082	0.056	0.045	0.037	0.044	0.037	0.023		35.8	0.0485	0.0547	0.0373	0.0356	0.032	0.0402	0.0375	0.023		0.0455	0.052	0.0388	0.0335	0.0299	0.0396	0.0358	0.0186		0.0429	0.0497	0.04	0.032	0.0282	0.0383	0.0331	0.0186		0.0243	0.0247
36	0.05351	0.05817	0.02669	0.02736	0.0355	0.04097	0.03093	0.02306		15.05	0.073	0.082	0.056	0.045	0.037	0.045	0.038	0.023		36	0.0483	0.0545	0.0373	0.0355	0.032	0.0399	0.0374	0.0191		0.0451	0.0515	0.0388	0.0333	0.0297	0.0394	0.0357	0.0186		0.0427	0.0494	0.0398	0.0319	0.0281	0.0381	0.0329	0.0185		0.0242	0.0246
36.2	0.05301	0.05837	0.02724	0.03006	0.0365	0.03422	0.03173	0.02161		15.1	0.073	0.082	0.056	0.046	0.037	0.045	0.038	0.023		36.2	0.0481	0.0536	0.0376	0.0351	0.032	0.0397	0.0372	0.0199		0.0448	0.0512	0.039	0.0331	0.0295	0.0393	0.0355	0.0185		0.0424	0.049	0.0396	0.0317	0.0279	0.0379	0.0328	0.0184		0.024	0.0244
36.4	0.05176	0.05667	0.02779	0.03121	0.03755	0.03602	0.03103	0.02226		15.15	0.073	0.082	0.057	0.046	0.038	0.045	0.039	0.023		36.4	0.0475	0.0533	0.0376	0.0349	0.0316	0.0397	0.0371	0.0222		0.0444	0.051	0.0389	0.033	0.0294	0.0392	0.0353	0.0184		0.0421	0.0485	0.0394	0.0316	0.0278	0.0378	0.0327	0.0184		0.0239	0.0243
36.6	0.05281	0.05737	0.02914	0.03061	0.03965	0.03572	0.03368	0.02046		15.2	0.073	0.082	0.057	0.046	0.038	0.045	0.039	0.023		36.6	0.047	0.0529	0.0369	0.0347	0.0315	0.0397	0.0369	0.0228		0.044	0.0505	0.0384	0.033	0.0293	0.039	0.0351	0.0183		0.0417	0.0481	0.0391	0.0314	0.0277	0.0376	0.0325	0.0183		0.0238	0.0241
36.8	0.05096	0.05397	0.02829	0.02821	0.0418	0.03792	0.02778	0.02231		15.25	0.073	0.083	0.057	0.047	0.038	0.046	0.04	0.024		36.8	0.0467	0.0523	0.0368	0.0346	0.0313	0.0396	0.0369	0.0207		0.0436	0.0501	0.0379	0.0329	0.0292	0.0389	0.035	0.0182		0.0414	0.0477	0.0388	0.0313	0.0275	0.0374	0.0324	0.0182		0.0236	0.024
37	0.05161	0.05692	0.03119	0.03001	0.04035	0.03852	0.03528	0.02341		15.3	0.073	0.083	0.057	0.047	0.038	0.046	0.04	0.024		37	0.0463	0.052	0.0367	0.0346	0.0311	0.0392	0.0367	0.0187		0.0433	0.0497	0.0377	0.0326	0.029	0.0386	0.0349	0.0182		0.041	0.0473	0.0386	0.031	0.0273	0.0372	0.0322	0.0182		0.0235	0.0239
37.2	0.05136	0.05562	0.02674	0.02946	0.03655	0.03967	0.02833	0.02151		15.35	0.074	0.083	0.057	0.047	0.039	0.046	0.041	0.024		37.2	0.0458	0.0518	0.0367	0.0342	0.031	0.039	0.0365	0.0218		0.043	0.0493	0.0376	0.0323	0.0288	0.0383	0.0347	0.0182		0.0407	0.0469	0.0383	0.0308	0.0271	0.037	0.0321	0.0181		0.0234	0.0237
37.4	0.05211	0.05352	0.02724	0.02906	0.03165	0.04022	0.03183	0.02061		15.4	0.074	0.083	0.057	0.048	0.039	0.046	0.041	0.024		37.4	0.0457	0.0515	0.0366	0.034	0.0305	0.0388	0.0362	0.0234		0.0427	0.0491	0.0376	0.032	0.0285	0.0381	0.0345	0.0181		0.0404	0.0466	0.038	0.0306	0.0269	0.0368	0.0319	0.018		0.0232	0.0236
37.6	0.04886	0.05427	0.02629	0.02926	0.0303	0.03622	0.02833	0.02031		15.45	0.074	0.083	0.058	0.048	0.039	0.046	0.041	0.024		37.6	0.0455	0.0516	0.0362	0.034	0.0305	0.0385	0.0359	0.0219		0.0425	0.0489	0.0375	0.0318	0.0283	0.0379	0.0342	0.018		0.0402	0.0463	0.0378	0.0304	0.0267	0.0366	0.0316	0.0179		0.0231	0.0235
37.8	0.04936	0.05792	0.02549	0.02761	0.03255	0.04397	0.03038	0.02161		15.5	0.075	0.083	0.058	0.049	0.039	0.046	0.042	0.024		37.8	0.0453	0.0516	0.0357	0.0336	0.0303	0.0384	0.0357	0.0191		0.0424	0.0486	0.0371	0.0317	0.0281	0.0377	0.034	0.0178		0.04	0.0461	0.0376	0.0302	0.0266	0.0363	0.0314	0.0178		0.023	0.0234
38	0.05146	0.05577	0.02839	0.03071	0.0358	0.03782	0.03033	0.01976		15.55	0.075	0.084	0.057	0.049	0.04	0.046	0.042	0.025		38	0.0453	0.0513	0.0358	0.0334	0.03	0.0381	0.0355	0.0196		0.0423	0.0484	0.0369	0.0316	0.028	0.0376	0.0339	0.0177		0.0397	0.046	0.0374	0.03	0.0264	0.0362	0.0312	0.0177		0.0229	0.0233
38.2	0.05051	0.05482	0.02594	0.02916	0.0417	0.03412	0.02743	0.02036		15.6	0.075	0.083	0.058	0.049	0.04	0.047	0.043	0.025		38.2	0.0455	0.0515	0.036	0.0332	0.0299	0.038	0.0353	0.0214		0.042	0.0483	0.0367	0.0314	0.0278	0.0374	0.0338	0.0176		0.0395	0.0458	0.0373	0.0298	0.0262	0.036	0.031	0.0176		0.0228	0.0231
38.4	0.04991	0.05397	0.02804	0.03106	0.04155	0.03232	0.03133	0.02236		15.65	0.075	0.084	0.059	0.049	0.04	0.047	0.043	0.025		38.4	0.0448	0.0512	0.0359	0.0333	0.0298	0.0379	0.0353	0.0224		0.0418	0.0482	0.0366	0.0312	0.0277	0.0372	0.0336	0.0176		0.0394	0.0457	0.0371	0.0296	0.026	0.0358	0.0309	0.0175		0.0226	0.023
38.6	0.05086	0.05632	0.02604	0.02721	0.0383	0.03342	0.03173	0.02486		15.7	0.075	0.084	0.058	0.049	0.04	0.046	0.043	0.025		38.6	0.0448	0.0508	0.0359	0.0333	0.0296	0.0379	0.0352	0.0215		0.0417	0.0481	0.0366	0.031	0.0275	0.037	0.0334	0.0175		0.0392	0.0455	0.037	0.0294	0.0259	0.0356	0.0307	0.0174		0.0225	0.0229
38.8	0.04966	0.05182	0.02634	0.03246	0.03655	0.03627	0.02848	0.02376		15.75	0.075	0.084	0.059	0.05	0.04	0.046	0.044	0.025		38.8	0.0449	0.0507	0.0356	0.033	0.0296	0.0377	0.035	0.0213		0.0417	0.0479	0.0365	0.0308	0.0273	0.0369	0.0331	0.0174		0.0391	0.0453	0.0368	0.0293	0.0257	0.0355	0.0305	0.0174		0.0224	0.0228
39	0.04826	0.05702	0.02679	0.02681	0.0349	0.03582	0.02863	0.02281		15.8	0.075	0.084	0.059	0.05	0.04	0.047	0.044	0.026		39	0.0445	0.0501	0.0354	0.0328	0.0295	0.0376	0.0348	0.0207		0.0415	0.0475	0.0364	0.0307	0.0272	0.0368	0.033	0.0173		0.0389	0.0451	0.0366	0.0291	0.0256	0.0354	0.0304	0.0173		0.0223	0.0227
39.2	0.05046	0.05842	0.02584	0.02666	0.03575	0.03737	0.03263	0.02151		15.85	0.075	0.084	0.059	0.05	0.041	0.047	0.044	0.026		39.2	0.0443	0.0497	0.0353	0.0325	0.0293	0.0375	0.0347	0.02		0.0412	0.0471	0.0361	0.0307	0.0271	0.0367	0.0328	0.0172		0.0388	0.0448	0.0365	0.029	0.0254	0.0352	0.0302	0.0172		0.0222	0.0226
39.4	0.05321	0.05922	0.02664	0.02796	0.0401	0.03537	0.02783	0.02031		15.9	0.075	0.084	0.059	0.05	0.041	0.047	0.045	0.026		39.4	0.044	0.0494	0.035	0.0324	0.0292	0.0376	0.0347	0.0204		0.041	0.0469	0.0358	0.0306	0.027	0.0366	0.0328	0.0172		0.0386	0.0445	0.0363	0.0288	0.0253	0.0351	0.0301	0.0171		0.0221	0.0225
39.6	0.04871	0.06377	0.02514	0.02551	0.03565	0.03582	0.02938	0.02126		15.95	0.075	0.085	0.06	0.051	0.041	0.047	0.046	0.026		39.6	0.0439	0.0491	0.035	0.0326	0.029	0.0375	0.0347	0.0199		0.0409	0.0466	0.0357	0.0304	0.0269	0.0364	0.0327	0.0172		0.0384	0.0442	0.0361	0.0287	0.0252	0.035	0.03	0.017		0.022	0.0224
39.8	0.04911	0.05957	0.02679	0.03236	0.037	0.03377	0.02788	0.02091		16	0.076	0.085	0.06	0.051	0.041	0.048	0.045	0.026		39.8	0.0437	0.0487	0.0349	0.0324	0.0289	0.037	0.0345	0.02		0.0408	0.0464	0.0357	0.0302	0.0268	0.0362	0.0326	0.0172		0.0382	0.0439	0.0359	0.0285	0.0251	0.0348	0.0298	0.017		0.0219	0.0223
40	0.05041	0.05472	0.02634	0.02646	0.0366	0.03282	0.02713	0.01926		16.05	0.076	0.084	0.06	0.051	0.041	0.048	0.045	0.026		40	0.0436	0.0484	0.0347	0.0322	0.0288	0.0367	0.0341	0.0201		0.0407	0.0462	0.0357	0.03	0.0267	0.036	0.0324	0.0172		0.038	0.0437	0.0357	0.0284	0.025	0.0347	0.0297	0.0169		0.0218	0.0222
40.2	0.04881	0.05652	0.02629	0.02731	0.0347	0.04232	0.02643	0.02076		16.1	0.076	0.084	0.061	0.051	0.042	0.048	0.046	0.026		40.2	0.0438	0.0487	0.0344	0.032	0.0286	0.0365	0.0337	0.0198		0.0406	0.046	0.0354	0.0299	0.0265	0.0359	0.0322	0.0171		0.0379	0.0435	0.0355	0.0282	0.0248	0.0345	0.0296	0.0169		0.0217	0.0221
40.4	0.04841	0.05487	0.02774	0.02831	0.03295	0.03822	0.02903	0.02131		16.15	0.076	0.085	0.06	0.052	0.042	0.048	0.047	0.026		40.4	0.0434	0.0487	0.0343	0.0319	0.0286	0.0365	0.0338	0.0204		0.0406	0.046	0.0352	0.0299	0.0264	0.0358	0.0321	0.017		0.0378	0.0434	0.0354	0.0281	0.0247	0.0343	0.0295	0.0168		0.0216	0.022
40.6	0.04766	0.05667	0.02789	0.02756	0.0367	0.03607	0.02778	0.02241		16.2	0.076	0.085	0.06	0.052	0.042	0.048	0.047	0.027		40.6	0.0434	0.0486	0.0345	0.0318	0.0285	0.0364	0.034	0.0206		0.0405	0.0458	0.035	0.0298	0.0263	0.0357	0.032	0.0169		0.0377	0.0433	0.0353	0.0279	0.0246	0.0342	0.0293	0.0168		0.0215	0.0219
40.8	0.04721	0.06067	0.02794	0.03046	0.0309	0.03502	0.02973	0.02001		16.25	0.076	0.085	0.061	0.052	0.042	0.047	0.047	0.027		40.8	0.0436	0.0482	0.0346	0.0318	0.0283	0.0363	0.034	0.0191		0.0404	0.0457	0.035	0.0297	0.0263	0.0355	0.0319	0.0169		0.0376	0.0431	0.0352	0.0278	0.0245	0.0341	0.0292	0.0167		0.0214	0.0218
41	0.04751	0.05772	0.02654	0.02591	0.03615	0.03672	0.02633	0.02281		16.3	0.076	0.085	0.06	0.052	0.042	0.048	0.047	0.027		41	0.0433	0.0477	0.0345	0.0319	0.0283	0.0362	0.0337	0.0184		0.0402	0.0453	0.0349	0.0296	0.0262	0.0354	0.0318	0.0169		0.0375	0.0428	0.0351	0.0277	0.0244	0.034	0.0291	0.0167		0.0213	0.0217
41.2	0.04621	0.05632	0.02804	0.03086	0.0345	0.03347	0.02623	0.02276		16.35	0.076	0.084	0.061	0.053	0.042	0.048	0.048	0.027		41.2	0.043	0.0473	0.0342	0.0316	0.0283	0.0362	0.0333	0.0203		0.0399	0.045	0.0349	0.0295	0.0262	0.0354	0.0317	0.0169		0.0373	0.0424	0.035	0.0277	0.0244	0.0339	0.029	0.0166		0.0212	0.0216
41.4	0.04901	0.05722	0.02584	0.02681	0.03525	0.03517	0.03278	0.02186		16.4	0.076	0.084	0.061	0.053	0.043	0.048	0.048	0.027		41.4	0.0424	0.0468	0.0341	0.0315	0.0283	0.0361	0.0332	0.0223		0.0396	0.0447	0.0348	0.0294	0.0261	0.0353	0.0316	0.0169		0.0371	0.042	0.0348	0.0276	0.0243	0.0338	0.029	0.0165		0.0211	0.0215
41.6	0.04616	0.05732	0.03019	0.02941	0.037	0.03737	0.02398	0.01911		16.45	0.076	0.084	0.061	0.053	0.042	0.049	0.048	0.027		41.6	0.042	0.0462	0.0341	0.0314	0.0283	0.0361	0.0333	0.0212		0.0392	0.0443	0.0347	0.0293	0.026	0.0352	0.0315	0.0169		0.0368	0.0416	0.0346	0.0275	0.0242	0.0337	0.0289	0.0165		0.021	0.0214
41.8	0.04751	0.05757	0.02759	0.02486	0.0409	0.03592	0.03008	0.02216		16.5	0.076	0.084	0.061	0.053	0.043	0.049	0.049	0.027		41.8	0.0414	0.0458	0.0338	0.0313	0.0283	0.0359	0.0335	0.0192		0.0388	0.0439	0.0344	0.0292	0.0259	0.0351	0.0314	0.0168		0.0364	0.0412	0.0343	0.0273	0.0241	0.0336	0.0288	0.0165		0.0209	0.0213
42	0.04651	0.05722	0.02664	0.02466	0.0368	0.03602	0.02663	0.02251		16.55	0.076	0.084	0.061	0.053	0.043	0.049	0.049	0.027		42	0.0411	0.0458	0.0337	0.0312	0.028	0.0356	0.0333	0.0174		0.0385	0.0436	0.0341	0.0291	0.0258	0.0349	0.0313	0.0168		0.036	0.041	0.0341	0.0272	0.024	0.0334	0.0287	0.0164		0.0208	0.0211
42.2	0.04701	0.05592	0.02599	0.02581	0.0363	0.03312	0.03088	0.02486		16.6	0.076	0.084	0.062	0.053	0.043	0.049	0.049	0.027		42.2	0.0407	0.0457	0.0333	0.031	0.0278	0.0352	0.0329	0.019		0.0382	0.0434	0.0338	0.0289	0.0257	0.0347	0.0312	0.017		0.0357	0.0409	0.0338	0.0269	0.0238	0.0332	0.0285	0.0164		0.0206	0.021
42.4	0.04481	0.05592	0.02489	0.02851	0.03995	0.03222	0.02598	0.02061		16.65	0.076	0.084	0.061	0.053	0.043	0.049	0.049	0.027		42.4	0.0407	0.0457	0.0333	0.0307	0.0276	0.0349	0.0325	0.0212		0.038	0.0433	0.0337	0.0287	0.0255	0.0345	0.0311	0.0171		0.0355	0.0408	0.0336	0.0267	0.0236	0.033	0.0284	0.0163		0.0205	0.0209
42.6	0.04421	0.05387	0.02749	0.02531	0.0327	0.03582	0.02778	0.02011		16.7	0.075	0.084	0.061	0.054	0.043	0.049	0.05	0.028		42.6	0.0407	0.0458	0.0333	0.0304	0.0273	0.0348	0.0323	0.0214		0.038	0.0434	0.0337	0.0285	0.0253	0.0343	0.0309	0.0172		0.0353	0.0407	0.0335	0.0265	0.0235	0.0328	0.0282	0.0162		0.0204	0.0208
42.8	0.04621	0.05542	0.02629	0.02531	0.03665	0.03572	0.02648	0.01981		16.75	0.075	0.083	0.061	0.054	0.043	0.049	0.05	0.028		42.8	0.0408	0.0456	0.0332	0.0303	0.0271	0.0348	0.0323	0.02		0.0381	0.0434	0.0337	0.0283	0.0251	0.0341	0.0307	0.0173		0.0352	0.0407	0.0333	0.0263	0.0233	0.0326	0.028	0.0161		0.0203	0.0207
43	0.04456	0.05572	0.02804	0.02791	0.0339	0.03392	0.02718	0.01891		16.8	0.075	0.083	0.061	0.054	0.043	0.048	0.05	0.028		43	0.0409	0.0454	0.0332	0.0303	0.027	0.0347	0.0323	0.0182		0.038	0.0432	0.0336	0.0282	0.025	0.0339	0.0305	0.0173		0.0352	0.0404	0.0333	0.0262	0.0231	0.0325	0.0278	0.0161		0.0202	0.0205
43.2	0.04536	0.05662	0.02909	0.02731	0.034	0.03707	0.02763	0.02031		16.85	0.075	0.083	0.062	0.055	0.044	0.049	0.05	0.028		43.2	0.0405	0.0448	0.0329	0.0305	0.0269	0.0345	0.0322	0.0187		0.0378	0.0429	0.0335	0.0281	0.0248	0.0339	0.0303	0.0173		0.0351	0.04	0.0332	0.0261	0.023	0.0324	0.0276	0.016		0.02	0.0204
43.4	0.04536	0.05717	0.02584	0.02271	0.03775	0.03212	0.02333	0.01926		16.9	0.075	0.083	0.062	0.055	0.044	0.049	0.05	0.028		43.4	0.0403	0.0441	0.0329	0.0304	0.0269	0.0345	0.0319	0.0189		0.0376	0.0425	0.0333	0.0281	0.0247	0.0338	0.0302	0.0173		0.0349	0.0395	0.033	0.026	0.0228	0.0323	0.0275	0.0159		0.0199	0.0203
43.6	0.04526	0.05107	0.02519	0.02486	0.03545	0.03772	0.02873	0.02021		16.95	0.075	0.083	0.061	0.054	0.044	0.049	0.051	0.028		43.6	0.0397	0.0433	0.0328	0.0303	0.0269	0.0346	0.0317	0.0185		0.0372	0.0419	0.0332	0.0281	0.0246	0.0338	0.0301	0.0173		0.0346	0.039	0.0328	0.026	0.0227	0.0322	0.0274	0.0158		0.0198	0.0201
43.8	0.04491	0.05017	0.02444	0.02501	0.03235	0.03412	0.02478	0.02171		17	0.074	0.082	0.061	0.055	0.044	0.049	0.051	0.028		43.8	0.039	0.0427	0.0328	0.03	0.0268	0.0344	0.0317	0.0166		0.0367	0.0412	0.033	0.028	0.0246	0.0337	0.0301	0.0173		0.0342	0.0385	0.0326	0.0258	0.0227	0.0321	0.0273	0.0157		0.0196	0.02
44	0.04366	0.05042	0.02784	0.02721	0.03295	0.03297	0.02868	0.02026		17.05	0.074	0.082	0.062	0.054	0.044	0.049	0.05	0.028		44	0.0384	0.0421	0.0325	0.0297	0.0266	0.0342	0.0317	0.018		0.0361	0.0406	0.0327	0.0277	0.0246	0.0336	0.03	0.0171		0.0338	0.0381	0.0323	0.0257	0.0225	0.0319	0.0272	0.0157		0.0195	0.0199
44.2	0.04346	0.05117	0.02584	0.02486	0.02755	0.03732	0.02468	0.01836		17.1	0.074	0.082	0.062	0.054	0.044	0.05	0.051	0.028		44.2	0.0377	0.0417	0.032	0.0295	0.0265	0.0339	0.0316	0.0198		0.0356	0.0402	0.0324	0.0275	0.0244	0.0334	0.0299	0.0168		0.0333	0.0378	0.032	0.0254	0.0224	0.0317	0.0271	0.0155		0.0194	0.0197
44.4	0.04191	0.04917	0.02734	0.02271	0.03405	0.03962	0.02978	0.02006		17.15	0.073	0.082	0.061	0.055	0.043	0.05	0.051	0.028		44.4	0.0374	0.0415	0.0317	0.0291	0.0263	0.0336	0.0313	0.0204		0.0353	0.04	0.0321	0.0273	0.0242	0.0331	0.0297	0.0166		0.0329	0.0375	0.0317	0.0252	0.0222	0.0314	0.0269	0.0155		0.0192	0.0196
44.6	0.04236	0.05162	0.02814	0.02316	0.0322	0.03412	0.02638	0.01831		17.2	0.073	0.081	0.061	0.055	0.044	0.049	0.051	0.028		44.6	0.0371	0.0415	0.0313	0.0288	0.026	0.0331	0.0311	0.0188		0.0352	0.0399	0.0319	0.027	0.024	0.0328	0.0296	0.0164		0.0327	0.0373	0.0314	0.0249	0.022	0.0312	0.0267	0.0153		0.0191	0.0195
44.8	0.04181	0.05282	0.02499	0.02526	0.02795	0.03042	0.02383	0.02191		17.25	0.073	0.081	0.062	0.055	0.044	0.049	0.051	0.029		44.8	0.0372	0.0414	0.0314	0.0286	0.0257	0.0328	0.0309	0.0164		0.0352	0.0398	0.0317	0.0268	0.0238	0.0324	0.0293	0.0162		0.0324	0.037	0.0312	0.0246	0.0218	0.0309	0.0265	0.0151		0.019	0.0194
45	0.04161	0.05257	0.02919	0.02811	0.02945	0.02867	0.02663	0.02076		17.3	0.073	0.081	0.061	0.055	0.044	0.049	0.051	0.028		45	0.0374	0.0411	0.0313	0.0284	0.0253	0.0326	0.0306	0.018		0.0351	0.0396	0.0315	0.0266	0.0236	0.0322	0.0291	0.0162		0.0323	0.0367	0.031	0.0245	0.0216	0.0307	0.0263	0.0149		0.0189	0.0193
45.2	0.04136	0.05282	0.02564	0.02381	0.0282	0.03562	0.02343	0.01986		17.35	0.073	0.081	0.062	0.055	0.044	0.05	0.051	0.028		45.2	0.0373	0.0408	0.0312	0.0284	0.025	0.0324	0.0303	0.0186		0.0351	0.0393	0.0314	0.0264	0.0234	0.032	0.0288	0.0161		0.0322	0.0364	0.0308	0.0243	0.0214	0.0305	0.0261	0.0148		0.0188	0.0191
45.4	0.04201	0.04907	0.02679	0.02286	0.03055	0.04152	0.02708	0.01881		17.4	0.072	0.08	0.062	0.055	0.044	0.05	0.052	0.028		45.4	0.0371	0.0406	0.0312	0.0284	0.0249	0.0323	0.0299	0.0182		0.0349	0.0389	0.0314	0.0263	0.0232	0.0319	0.0286	0.0159		0.032	0.0361	0.0307	0.0242	0.0213	0.0303	0.0259	0.0146		0.0187	0.019
45.6	0.04096	0.04657	0.02409	0.02346	0.0317	0.03157	0.02508	0.01861		17.45	0.072	0.08	0.061	0.055	0.044	0.05	0.052	0.028		45.6	0.0368	0.0403	0.0311	0.0283	0.0248	0.0323	0.0297	0.0178		0.0346	0.0385	0.0313	0.0263	0.0231	0.0318	0.0285	0.0158		0.0318	0.0359	0.0306	0.024	0.0211	0.0301	0.0257	0.0145		0.0186	0.019
45.8	0.04031	0.04622	0.02449	0.02336	0.0264	0.03337	0.02783	0.02041		17.5	0.072	0.08	0.06	0.055	0.044	0.05	0.051	0.028		45.8	0.0365	0.0403	0.0311	0.0281	0.0248	0.0322	0.0297	0.0177		0.0342	0.0383	0.0313	0.0262	0.023	0.0317	0.0284	0.0157		0.0316	0.0356	0.0304	0.0239	0.021	0.03	0.0256	0.0144		0.0185	0.0189
46	0.04161	0.04652	0.02734	0.02401	0.0329	0.03302	0.02508	0.01961		17.55	0.071	0.08	0.061	0.055	0.044	0.05	0.052	0.028		46	0.0361	0.0402	0.0309	0.0279	0.0248	0.0321	0.0297	0.0177		0.0339	0.0383	0.0311	0.026	0.0229	0.0316	0.0283	0.0158		0.0314	0.0355	0.0303	0.0237	0.0208	0.0298	0.0254	0.0143		0.0184	0.0188
46.2	0.03976	0.04447	0.02319	0.02661	0.02725	0.03247	0.02528	0.02046		17.6	0.071	0.08	0.061	0.054	0.044	0.049	0.052	0.028		46.2	0.0357	0.0399	0.0308	0.0278	0.0246	0.032	0.0297	0.0186		0.0337	0.0384	0.0309	0.0259	0.0228	0.0314	0.0282	0.0158		0.0311	0.0355	0.0301	0.0236	0.0207	0.0297	0.0253	0.0142		0.0183	0.0187
46.4	0.04046	0.04407	0.02594	0.02486	0.02425	0.03172	0.02133	0.01751		17.65	0.071	0.079	0.06	0.054	0.044	0.05	0.052	0.029		46.4	0.0354	0.0401	0.0307	0.0276	0.0245	0.0319	0.0295	0.0191		0.0336	0.0385	0.0307	0.0257	0.0226	0.0312	0.028	0.0158		0.0309	0.0355	0.03	0.0234	0.0205	0.0295	0.0251	0.0142		0.0182	0.0186
46.6	0.04031	0.04572	0.02469	0.02251	0.02345	0.02942	0.02243	0.01851		17.7	0.071	0.079	0.061	0.055	0.044	0.05	0.052	0.028		46.6	0.0351	0.04	0.0305	0.0273	0.0243	0.0316	0.0292	0.0197		0.0335	0.0385	0.0306	0.0255	0.0224	0.031	0.0279	0.0158		0.0307	0.0356	0.0298	0.0232	0.0203	0.0294	0.025	0.0141		0.0181	0.0185
46.8	0.03886	0.04892	0.02339	0.02041	0.02365	0.03222	0.02438	0.01886		17.75	0.071	0.079	0.06	0.055	0.044	0.049	0.052	0.028		46.8	0.0352	0.0398	0.0306	0.027	0.0242	0.0314	0.0289	0.0195		0.0335	0.0384	0.0304	0.0252	0.0222	0.0309	0.0276	0.0158		0.0306	0.0356	0.0297	0.0231	0.0202	0.0292	0.0248	0.014		0.0181	0.0185
47	0.04021	0.05087	0.02499	0.02331	0.02395	0.03592	0.02588	0.01876		17.8	0.071	0.079	0.06	0.055	0.044	0.05	0.052	0.028		47	0.0353	0.0397	0.0304	0.0267	0.024	0.0313	0.0288	0.018		0.0335	0.0382	0.0303	0.0251	0.0221	0.0308	0.0274	0.0157		0.0306	0.0355	0.0296	0.0229	0.02	0.0291	0.0246	0.0139		0.018	0.0184
47.2	0.03741	0.04967	0.02414	0.02286	0.0246	0.03402	0.02273	0.01721		17.85	0.07	0.078	0.061	0.055	0.044	0.049	0.052	0.028		47.2	0.0354	0.0394	0.0301	0.0267	0.0238	0.0312	0.0287	0.017		0.0335	0.0379	0.0302	0.025	0.022	0.0307	0.0273	0.0156		0.0306	0.0354	0.0295	0.0228	0.0199	0.029	0.0245	0.0139		0.0179	0.0183
47.4	0.03836	0.05062	0.02554	0.02086	0.0278	0.03767	0.02628	0.01881		17.9	0.07	0.078	0.06	0.054	0.044	0.049	0.052	0.028		47.4	0.0356	0.039	0.03	0.0269	0.0236	0.0311	0.0287	0.0144		0.0334	0.0377	0.0302	0.025	0.0219	0.0307	0.0272	0.0155		0.0306	0.0351	0.0294	0.0227	0.0198	0.0289	0.0243	0.0138		0.0178	0.0183
47.6	0.03766	0.04887	0.02409	0.02411	0.02765	0.03007	0.02233	0.02046		17.95	0.07	0.078	0.06	0.054	0.044	0.049	0.052	0.029		47.6	0.0356	0.0388	0.0297	0.027	0.0235	0.031	0.0287	0.0166		0.0334	0.0373	0.0301	0.0249	0.0219	0.0306	0.0271	0.0154		0.0305	0.0348	0.0293	0.0226	0.0197	0.0288	0.0242	0.0137		0.0178	0.0182
47.8	0.03826	0.04922	0.02369	0.02421	0.0294	0.02872	0.02458	0.01966		18	0.07	0.078	0.06	0.054	0.044	0.049	0.052	0.028		47.8	0.0353	0.0384	0.0295	0.0269	0.0234	0.0308	0.0284	0.0179		0.0332	0.0371	0.03	0.0249	0.0218	0.0305	0.0271	0.0154		0.0304	0.0346	0.0292	0.0225	0.0196	0.0287	0.0241	0.0137		0.0177	0.0181
48	0.03711	0.04702	0.02474	0.02286	0.02785	0.02937	0.02208	0.02026		18.05	0.07	0.078	0.06	0.054	0.044	0.048	0.052	0.028		48	0.0353	0.0384	0.0296	0.0267	0.0233	0.0307	0.0281	0.0194		0.033	0.037	0.0298	0.0248	0.0217	0.0303	0.027	0.0154		0.0303	0.0343	0.029	0.0225	0.0196	0.0286	0.0241	0.0136		0.0177	0.0181
48.2	0.03721	0.04657	0.02329	0.02546	0.027	0.03257	0.02243	0.01916		18.1	0.07	0.078	0.06	0.054	0.044	0.049	0.052	0.028		48.2	0.035	0.0383	0.0295	0.0265	0.0233	0.0306	0.028	0.0189		0.0329	0.037	0.0297	0.0246	0.0216	0.0302	0.0269	0.0153		0.0301	0.0341	0.0289	0.0223	0.0195	0.0285	0.024	0.0136		0.0176	0.018
48.4	0.03751	0.04737	0.02439	0.02136	0.02365	0.03802	0.02418	0.01816		18.15	0.07	0.077	0.059	0.054	0.043	0.049	0.052	0.028		48.4	0.0347	0.0383	0.0296	0.0264	0.0234	0.0305	0.028	0.0186		0.0328	0.0368	0.0296	0.0245	0.0215	0.0301	0.0268	0.0152		0.03	0.034	0.0287	0.0222	0.0194	0.0283	0.0239	0.0136		0.0175	0.018
48.6	0.03706	0.04752	0.02354	0.02216	0.02495	0.03542	0.02368	0.01846		18.2	0.07	0.077	0.06	0.054	0.044	0.049	0.052	0.028		48.6	0.0346	0.0381	0.0295	0.0264	0.0233	0.0304	0.028	0.0185		0.0326	0.0366	0.0295	0.0244	0.0214	0.0299	0.0266	0.0152		0.0299	0.0339	0.0286	0.0221	0.0193	0.0282	0.0238	0.0136		0.0175	0.0179
48.8	0.03841	0.04902	0.02329	0.02116	0.02645	0.03912	0.02313	0.01886		18.25	0.069	0.077	0.059	0.054	0.044	0.049	0.052	0.028		48.8	0.0346	0.038	0.0293	0.0263	0.0233	0.0302	0.028	0.0168		0.0326	0.0365	0.0293	0.0243	0.0214	0.0299	0.0265	0.0151		0.0298	0.0338	0.0285	0.0219	0.0192	0.0281	0.0237	0.0135		0.0175	0.0179
49	0.03731	0.04612	0.02369	0.02061	0.02715	0.03087	0.02403	0.01941		18.3	0.069	0.077	0.059	0.054	0.044	0.049	0.052	0.028		49	0.0345	0.0379	0.0292	0.0262	0.0233	0.0301	0.0279	0.0143		0.0325	0.0365	0.0292	0.0243	0.0213	0.0298	0.0264	0.0151		0.0297	0.0337	0.0284	0.0218	0.0191	0.028	0.0236	0.0135		0.0174	0.0179
49.2	0.03846	0.04617	0.02259	0.02056	0.0237	0.02712	0.02313	0.01986		18.35	0.069	0.076	0.059	0.054	0.044	0.049	0.052	0.028		49.2	0.0346	0.0377	0.029	0.0259	0.0231	0.03	0.0277	0.0156		0.0326	0.0364	0.0292	0.0242	0.0213	0.0297	0.0264	0.0151		0.0296	0.0337	0.0284	0.0217	0.019	0.0279	0.0235	0.0134		0.0174	0.0178
49.4	0.03706	0.04487	0.02399	0.02216	0.02135	0.02922	0.02418	0.01976		18.4	0.069	0.076	0.059	0.054	0.044	0.049	0.052	0.028		49.4	0.0345	0.0376	0.0292	0.0259	0.023	0.03	0.0276	0.017		0.0325	0.0362	0.0291	0.0241	0.0212	0.0296	0.0263	0.0151		0.0295	0.0336	0.0283	0.0217	0.0189	0.0279	0.0235	0.0134		0.0174	0.0178
49.6	0.03711	0.04442	0.02314	0.02036	0.0226	0.02827	0.02128	0.01631		18.45	0.069	0.076	0.059	0.054	0.044	0.049	0.052	0.028		49.6	0.0344	0.0375	0.0292	0.0259	0.0229	0.03	0.0275	0.0176		0.0323	0.0361	0.0291	0.024	0.0211	0.0295	0.0263	0.0151		0.0295	0.0334	0.0282	0.0217	0.0189	0.0278	0.0234	0.0133		0.0173	0.0178
49.8	0.03671	0.04532	0.02229	0.02226	0.02245	0.03147	0.02123	0.01711		18.5	0.069	0.076	0.059	0.054	0.044	0.049	0.052	0.028		49.8	0.0342	0.0373	0.0293	0.026	0.0229	0.03	0.0275	0.0177		0.0322	0.036	0.029	0.0239	0.021	0.0294	0.0262	0.015		0.0294	0.0333	0.0282	0.0216	0.0189	0.0277	0.0233	0.0133		0.0173	0.0178
50	0.03686	0.04547	0.02319	0.02141	0.02015	0.02962	0.02373	0.01796		18.55	0.069	0.076	0.059	0.053	0.044	0.049	0.052	0.028		50	0.0341	0.0372	0.0292	0.0259	0.0228	0.0298	0.0274	0.0165		0.0321	0.0359	0.029	0.0239	0.021	0.0294	0.0261	0.015		0.0293	0.0332	0.0281	0.0216	0.0188	0.0277	0.0233	0.0133		0.0173	0.0178
50.2	0.03636	0.04502	0.02194	0.02051	0.0208	0.03052	0.02278	0.01791		18.6	0.069	0.076	0.059	0.053	0.044	0.049	0.051	0.027		50.2	0.0338	0.0372	0.0289	0.0258	0.0227	0.0296	0.0273	0.0161		0.0319	0.0358	0.0289	0.0238	0.0209	0.0293	0.026	0.0149		0.0292	0.0332	0.028	0.0215	0.0188	0.0276	0.0232	0.0133		0.0173	0.0178
50.4	0.03666	0.04512	0.02359	0.02121	0.02165	0.03057	0.02173	0.01796		18.65	0.068	0.076	0.059	0.053	0.044	0.049	0.051	0.028		50.4	0.0336	0.0374	0.0288	0.0255	0.0227	0.0294	0.0271	0.0172		0.0318	0.0358	0.0288	0.0238	0.0209	0.0292	0.0259	0.0149		0.0291	0.0333	0.0279	0.0214	0.0187	0.0275	0.0231	0.0132		0.0173	0.0178
50.6	0.03656	0.04597	0.02259	0.02006	0.021	0.02977	0.02353	0.01736		18.7	0.068	0.076	0.059	0.053	0.045	0.049	0.051	0.027		50.6	0.0334	0.0378	0.0287	0.0254	0.0226	0.0294	0.0269	0.0177		0.0318	0.0361	0.0288	0.0237	0.0209	0.0291	0.0258	0.015		0.0291	0.0334	0.0278	0.0213	0.0186	0.0274	0.023	0.0132		0.0173	0.0178
50.8	0.03591	0.04742	0.02209	0.02186	0.0216	0.03182	0.02178	0.01991		18.75	0.068	0.076	0.059	0.053	0.045	0.049	0.051	0.027		50.8	0.0335	0.0382	0.0286	0.0254	0.0225	0.0293	0.0269	0.0186		0.0318	0.0364	0.0287	0.0236	0.0208	0.0291	0.0257	0.0151		0.0291	0.0336	0.0278	0.0212	0.0185	0.0273	0.023	0.0132		0.0173	0.0179
51	0.03661	0.04502	0.02324	0.02086	0.02245	0.03152	0.01913	0.01971		18.8	0.068	0.076	0.059	0.053	0.045	0.049	0.052	0.027		51	0.0337	0.0381	0.0287	0.0253	0.0225	0.0293	0.0269	0.0181		0.0319	0.0368	0.0287	0.0235	0.0207	0.029	0.0257	0.0151		0.0291	0.0337	0.0278	0.0211	0.0184	0.0272	0.0229	0.0131		0.0174	0.0179
51.2	0.03691	0.04547	0.02159	0.01971	0.02135	0.02647	0.02303	0.02031		18.85	0.068	0.075	0.058	0.053	0.045	0.049	0.051	0.027		51.2	0.034	0.0382	0.0288	0.0253	0.0223	0.0292	0.0269	0.0179		0.032	0.0368	0.0288	0.0234	0.0206	0.0289	0.0256	0.0151		0.0292	0.0339	0.0278	0.0211	0.0184	0.0272	0.0228	0.0131		0.0174	0.0179
51.4	0.03546	0.04557	0.02244	0.02181	0.02205	0.02972	0.02193	0.02046		18.9	0.068	0.075	0.059	0.053	0.045	0.049	0.051	0.027		51.4	0.0339	0.0381	0.0287	0.0253	0.0222	0.0292	0.0268	0.018		0.0321	0.0367	0.0288	0.0234	0.0205	0.0289	0.0255	0.0151		0.0292	0.0339	0.0279	0.0211	0.0183	0.0272	0.0227	0.0131		0.0174	0.018
51.6	0.03576	0.04642	0.02404	0.02146	0.02235	0.02922	0.02388	0.01896		18.95	0.068	0.075	0.058	0.053	0.045	0.049	0.051	0.027		51.6	0.0341	0.0379	0.0287	0.0252	0.0222	0.0293	0.0267	0.0178		0.0321	0.0366	0.0288	0.0234	0.0204	0.029	0.0255	0.015		0.0292	0.0339	0.0279	0.0211	0.0182	0.0273	0.0227	0.0131		0.0175	0.018
51.8	0.03586	0.04797	0.02289	0.02006	0.02185	0.02937	0.02093	0.01836		19	0.068	0.075	0.058	0.053	0.044	0.049	0.051	0.027		51.8	0.0342	0.0379	0.0288	0.0254	0.0222	0.0294	0.0266	0.0168		0.0321	0.0364	0.0287	0.0234	0.0204	0.0291	0.0254	0.015		0.0292	0.0338	0.0279	0.0211	0.0182	0.0273	0.0226	0.0131		0.0175	0.0181
52	0.03501	0.04752	0.02319	0.02046	0.0208	0.02997	0.02158	0.01981		19.05	0.068	0.075	0.059	0.053	0.044	0.049	0.051	0.027		52	0.034	0.0377	0.0287	0.0254	0.0223	0.0294	0.0267	0.0162		0.0321	0.0363	0.0286	0.0235	0.0205	0.0291	0.0255	0.0149		0.0292	0.0338	0.0278	0.0211	0.0182	0.0273	0.0226	0.0131		0.0176	0.0181
52.2	0.03546	0.04912	0.02194	0.02091	0.02045	0.03017	0.02178	0.01926		19.1	0.068	0.075	0.058	0.053	0.045	0.049	0.051	0.027		52.2	0.034	0.0377	0.0287	0.0254	0.0223	0.0295	0.0267	0.0158		0.032	0.0363	0.0286	0.0235	0.0205	0.0291	0.0255	0.015		0.0292	0.0338	0.0278	0.0211	0.0182	0.0273	0.0227	0.0131		0.0176	0.0182
52.4	0.03521	0.04737	0.02169	0.01841	0.0239	0.02692	0.02103	0.01861		19.15	0.068	0.075	0.059	0.053	0.045	0.049	0.051	0.027		52.4	0.034	0.0381	0.0286	0.0252	0.0222	0.0294	0.0267	0.0158		0.0321	0.0364	0.0285	0.0234	0.0205	0.029	0.0255	0.015		0.0292	0.0339	0.0278	0.0211	0.0182	0.0273	0.0227	0.0131		0.0177	0.0183
52.6	0.03626	0.04582	0.02124	0.02091	0.02195	0.02807	0.02208	0.01851		19.2	0.068	0.075	0.059	0.053	0.045	0.05	0.051	0.027		52.6	0.0339	0.0384	0.0283	0.0252	0.0223	0.0292	0.0267	0.0164		0.0322	0.0367	0.0285	0.0233	0.0205	0.0289	0.0255	0.0151		0.0293	0.0341	0.0278	0.021	0.0182	0.0272	0.0227	0.0132		0.0177	0.0183
52.8	0.03581	0.04652	0.02089	0.01956	0.0249	0.02677	0.01973	0.01776		19.25	0.067	0.075	0.058	0.053	0.045	0.05	0.051	0.027		52.8	0.034	0.0387	0.0285	0.0252	0.0223	0.0292	0.0266	0.0177		0.0323	0.037	0.0285	0.0233	0.0204	0.0289	0.0254	0.0151		0.0294	0.0343	0.0278	0.021	0.0182	0.0272	0.0226	0.0132		0.0178	0.0184
53	0.03491	0.04637	0.02209	0.02011	0.02285	0.02792	0.02118	0.01771		19.3	0.067	0.075	0.058	0.053	0.045	0.049	0.051	0.026		53	0.0342	0.0389	0.0285	0.0251	0.0222	0.0291	0.0266	0.018		0.0325	0.0373	0.0286	0.0232	0.0204	0.0289	0.0254	0.015		0.0295	0.0345	0.0279	0.0209	0.0182	0.0272	0.0226	0.0132		0.0179	0.0185
53.2	0.03616	0.04622	0.02224	0.02271	0.02095	0.02667	0.02258	0.01946		19.35	0.067	0.074	0.058	0.052	0.045	0.049	0.051	0.027		53.2	0.0345	0.0393	0.0285	0.0252	0.0223	0.0291	0.0266	0.0179		0.0327	0.0375	0.0287	0.0232	0.0204	0.0289	0.0253	0.0149		0.0297	0.0347	0.0279	0.0209	0.0182	0.0272	0.0226	0.0132		0.018	0.0185
53.4	0.03596	0.04532	0.02189	0.01976	0.0215	0.03032	0.02058	0.01801		19.4	0.067	0.074	0.058	0.053	0.045	0.049	0.051	0.027		53.4	0.0348	0.0394	0.0287	0.0252	0.0223	0.0292	0.0265	0.0176		0.0329	0.0377	0.0287	0.0233	0.0204	0.029	0.0253	0.0149		0.0299	0.0349	0.028	0.021	0.0182	0.0273	0.0226	0.0132		0.018	0.0186
53.6	0.03526	0.04432	0.02264	0.02166	0.0201	0.02722	0.02048	0.01836		19.45	0.067	0.074	0.058	0.053	0.045	0.049	0.051	0.027		53.6	0.035	0.0397	0.0287	0.0253	0.0222	0.0293	0.0265	0.0173		0.0331	0.0379	0.0287	0.0235	0.0204	0.0291	0.0253	0.0149		0.03	0.0351	0.0281	0.0211	0.0182	0.0273	0.0226	0.0132		0.0181	0.0187
53.8	0.03596	0.04552	0.02119	0.01961	0.02185	0.02632	0.01963	0.01791		19.5	0.067	0.074	0.058	0.053	0.045	0.049	0.051	0.027		53.8	0.0351	0.0396	0.0287	0.0254	0.0223	0.0295	0.0266	0.0172		0.0332	0.038	0.0288	0.0236	0.0205	0.0292	0.0254	0.0149		0.0302	0.0353	0.0283	0.0211	0.0183	0.0274	0.0227	0.0132		0.0182	0.0187
54	0.03601	0.05037	0.02269	0.02031	0.02175	0.03027	0.02013	0.01831		19.55	0.067	0.073	0.058	0.053	0.045	0.049	0.051	0.027		54	0.0354	0.0398	0.0289	0.0255	0.0224	0.0296	0.0266	0.0161		0.0333	0.0381	0.029	0.0236	0.0206	0.0293	0.0255	0.0149		0.0304	0.0354	0.0284	0.0212	0.0184	0.0275	0.0227	0.0133		0.0182	0.0188
54.2	0.03571	0.05132	0.02109	0.01976	0.02105	0.02817	0.02393	0.01761		19.6	0.067	0.073	0.058	0.052	0.045	0.049	0.05	0.027		54.2	0.0354	0.0397	0.0289	0.0256	0.0224	0.0297	0.0268	0.016		0.0333	0.0382	0.029	0.0236	0.0207	0.0293	0.0255	0.015		0.0305	0.0354	0.0285	0.0213	0.0184	0.0276	0.0228	0.0133		0.0183	0.0189
54.4	0.03571	0.04842	0.02294	0.01841	0.02065	0.02882	0.02193	0.01706		19.65	0.067	0.073	0.058	0.052	0.045	0.049	0.05	0.026		54.4	0.0353	0.0398	0.0289	0.0256	0.0225	0.0298	0.0269	0.0163		0.0333	0.0381	0.0291	0.0236	0.0207	0.0294	0.0256	0.015		0.0305	0.0354	0.0285	0.0214	0.0185	0.0277	0.0229	0.0133		0.0184	0.019
54.6	0.03586	0.04687	0.02224	0.02096	0.02415	0.02652	0.02043	0.01916		19.7	0.066	0.073	0.058	0.052	0.045	0.049	0.05	0.026		54.6	0.0352	0.0394	0.0288	0.0257	0.0226	0.03	0.0268	0.0165		0.0332	0.0379	0.0291	0.0237	0.0207	0.0295	0.0256	0.015		0.0305	0.0353	0.0285	0.0214	0.0185	0.0278	0.023	0.0133		0.0184	0.019
54.8	0.03601	0.04767	0.02249	0.01971	0.02225	0.02717	0.01953	0.01826		19.75	0.066	0.073	0.058	0.052	0.045	0.049	0.05	0.026		54.8	0.0352	0.0393	0.0287	0.0257	0.0227	0.0298	0.0269	0.0169		0.033	0.0376	0.029	0.0237	0.0208	0.0296	0.0257	0.015		0.0305	0.0352	0.0285	0.0215	0.0186	0.0279	0.023	0.0134		0.0185	0.0191
55	0.03636	0.04847	0.02299	0.02111	0.02325	0.02857	0.02188	0.01886		19.8	0.066	0.073	0.057	0.052	0.045	0.049	0.05	0.026		55	0.0349	0.039	0.0286	0.0257	0.0229	0.0298	0.0269	0.0173		0.0329	0.0374	0.0289	0.0238	0.0209	0.0296	0.0257	0.015		0.0304	0.0352	0.0285	0.0215	0.0187	0.0279	0.0231	0.0134		0.0186	0.0192
55.2	0.03616	0.04622	0.02219	0.01991	0.02325	0.02592	0.02133	0.01796		19.85	0.066	0.073	0.057	0.052	0.045	0.049	0.05	0.026		55.2	0.0348	0.0394	0.0286	0.0257	0.0228	0.0299	0.027	0.0174		0.0329	0.0377	0.0287	0.0238	0.0209	0.0296	0.0258	0.015		0.0303	0.0353	0.0284	0.0215	0.0187	0.0279	0.0231	0.0134		0.0187	0.0193
55.4	0.03626	0.04712	0.02194	0.01901	0.0199	0.02647	0.02123	0.01846		19.9	0.066	0.072	0.057	0.052	0.045	0.049	0.05	0.026		55.4	0.0348	0.0398	0.0286	0.0256	0.0228	0.0299	0.027	0.0171		0.0331	0.0381	0.0287	0.0238	0.0209	0.0296	0.0258	0.0151		0.0303	0.0356	0.0284	0.0215	0.0188	0.0279	0.0232	0.0134		0.0188	0.0194
55.6	0.03731	0.04512	0.02279	0.02096	0.0204	0.02722	0.02013	0.01846		19.95	0.066	0.072	0.057	0.053	0.045	0.049	0.05	0.026		55.6	0.0351	0.0407	0.0288	0.0255	0.0228	0.0297	0.0271	0.0176		0.0334	0.0387	0.0289	0.0237	0.021	0.0295	0.0258	0.0151		0.0304	0.0359	0.0285	0.0214	0.0188	0.0278	0.0232	0.0134		0.0189	0.0194
55.8	0.03621	0.04492	0.02229	0.01806	0.02325	0.02602	0.02173	0.01631		20	0.065	0.072	0.058	0.052	0.045	0.049	0.05	0.027		55.8	0.0354	0.0417	0.0289	0.0255	0.0228	0.0296	0.027	0.0177		0.0337	0.0392	0.029	0.0236	0.0209	0.0294	0.0258	0.0151		0.0306	0.0363	0.0286	0.0214	0.0188	0.0278	0.0232	0.0134		0.0189	0.0195
56	0.03706	0.04412	0.02384	0.02036	0.0261	0.02717	0.02098	0.01781		20.05	0.065	0.072	0.058	0.052	0.045	0.049	0.05	0.026		56	0.036	0.0422	0.0292	0.0255	0.0226	0.0296	0.0269	0.0183		0.0341	0.0395	0.0292	0.0237	0.0208	0.0294	0.0258	0.015		0.0309	0.0366	0.0287	0.0214	0.0187	0.0278	0.0232	0.0134		0.019	0.0196
56.2	0.03696	0.04302	0.02194	0.01836	0.02205	0.02522	0.02338	0.01986		20.1	0.065	0.072	0.057	0.052	0.045	0.049	0.05	0.026		56.2	0.0368	0.0422	0.0293	0.0257	0.0226	0.0298	0.0269	0.0188		0.0343	0.0396	0.0294	0.0238	0.0207	0.0296	0.0257	0.015		0.0311	0.0368	0.0289	0.0215	0.0187	0.0279	0.0232	0.0133		0.0191	0.0196
56.4	0.03666	0.04482	0.02439	0.02156	0.02175	0.02527	0.01988	0.01786		20.15	0.065	0.072	0.057	0.052	0.045	0.049	0.05	0.026		56.4	0.0371	0.0422	0.0292	0.0261	0.0226	0.03	0.0269	0.0185		0.0343	0.0395	0.0294	0.024	0.0208	0.0298	0.0258	0.0149		0.0313	0.037	0.0291	0.0217	0.0188	0.0281	0.0232	0.0133		0.0191	0.0197
56.6	0.03706	0.04662	0.02424	0.01991	0.0202	0.02722	0.02188	0.01861		20.2	0.065	0.072	0.057	0.052	0.044	0.049	0.05	0.026		56.6	0.037	0.0424	0.0292	0.0263	0.0228	0.0306	0.027	0.0184		0.0344	0.0395	0.0295	0.0242	0.021	0.03	0.0259	0.0149		0.0315	0.0371	0.0292	0.0218	0.0189	0.0282	0.0233	0.0133		0.0192	0.0197
56.8	0.03696	0.04597	0.02264	0.02111	0.0217	0.03132	0.01753	0.01761		20.25	0.065	0.072	0.057	0.052	0.044	0.049	0.05	0.027		56.8	0.037	0.0419	0.0295	0.0266	0.0231	0.031	0.0273	0.0182		0.0344	0.0397	0.0296	0.0244	0.0212	0.0302	0.026	0.015		0.0316	0.0371	0.0293	0.022	0.019	0.0284	0.0234	0.0133		0.0192	0.0198
57	0.03736	0.04332	0.02399	0.02026	0.0211	0.02837	0.02188	0.01806		20.3	0.065	0.072	0.057	0.052	0.045	0.049	0.05	0.026		57	0.0372	0.0419	0.0298	0.0266	0.0234	0.0311	0.0275	0.0182		0.0344	0.0398	0.0297	0.0244	0.0214	0.0303	0.0262	0.0152		0.0317	0.0372	0.0294	0.0221	0.0191	0.0285	0.0235	0.0133		0.0193	0.0198
57.2	0.03741	0.04482	0.02244	0.02196	0.0223	0.02582	0.02248	0.01636		20.35	0.064	0.072	0.057	0.052	0.045	0.049	0.05	0.026		57.2	0.0369	0.0416	0.0296	0.0266	0.0236	0.0311	0.0276	0.0178		0.0344	0.0397	0.0298	0.0243	0.0214	0.0303	0.0263	0.0153		0.0317	0.0371	0.0294	0.0222	0.0192	0.0286	0.0236	0.0133		0.0193	0.0198
57.4	0.03681	0.04497	0.02499	0.01996	0.0249	0.02677	0.02093	0.01976		20.4	0.064	0.071	0.057	0.052	0.044	0.048	0.05	0.026		57.4	0.0365	0.0414	0.0296	0.0265	0.0236	0.0311	0.0277	0.017		0.0342	0.0395	0.0298	0.0243	0.0214	0.0303	0.0263	0.0153		0.0316	0.037	0.0295	0.0222	0.0193	0.0286	0.0237	0.0134		0.0193	0.0198
57.6	0.03711	0.04552	0.02289	0.02396	0.02585	0.02747	0.02413	0.01816		20.45	0.064	0.072	0.056	0.052	0.045	0.048	0.049	0.026		57.6	0.0363	0.0413	0.0293	0.0264	0.0237	0.031	0.0278	0.0151		0.034	0.0391	0.0297	0.0243	0.0213	0.0304	0.0263	0.0152		0.0315	0.0369	0.0294	0.0222	0.0193	0.0287	0.0238	0.0134		0.0193	0.0199
57.8	0.03781	0.04447	0.02209	0.02011	0.0266	0.02692	0.02208	0.01896		20.5	0.064	0.071	0.056	0.052	0.045	0.048	0.05	0.026		57.8	0.0359	0.0411	0.0293	0.0264	0.0238	0.0308	0.0278	0.0166		0.0338	0.0388	0.0296	0.0243	0.0214	0.0305	0.0264	0.0152		0.0314	0.0368	0.0294	0.0222	0.0193	0.0287	0.0238	0.0135		0.0194	0.0199
58	0.03711	0.04682	0.02254	0.02051	0.0288	0.02742	0.02073	0.01806		20.55	0.064	0.071	0.057	0.052	0.045	0.048	0.05	0.026		58	0.0361	0.0408	0.0293	0.0263	0.0238	0.0308	0.0278	0.0175		0.0339	0.0387	0.0294	0.0244	0.0214	0.0305	0.0264	0.0151		0.0313	0.0366	0.0293	0.0222	0.0194	0.0288	0.0239	0.0135		0.0194	0.0199
58.2	0.03761	0.04937	0.02154	0.02006	0.02295	0.02647	0.02248	0.01916		20.6	0.064	0.071	0.056	0.052	0.044	0.049	0.049	0.026		58.2	0.0365	0.0404	0.0293	0.0264	0.0237	0.0307	0.0279	0.0185		0.0339	0.0387	0.0293	0.0245	0.0216	0.0304	0.0264	0.0151		0.0312	0.0365	0.0292	0.0222	0.0194	0.0287	0.0239	0.0135		0.0194	0.0199
58.4	0.03686	0.05132	0.02349	0.02336	0.02485	0.02642	0.02178	0.01986		20.65	0.064	0.071	0.057	0.051	0.044	0.048	0.049	0.026		58.4	0.0367	0.0407	0.029	0.0263	0.0234	0.0307	0.0278	0.0191		0.034	0.0387	0.0293	0.0245	0.0216	0.0303	0.0265	0.0152		0.0311	0.0364	0.0292	0.0222	0.0194	0.0287	0.0239	0.0136		0.0194	0.0199
58.6	0.03676	0.04957	0.02349	0.02086	0.02355	0.02702	0.02353	0.01876		20.7	0.064	0.071	0.056	0.051	0.044	0.048	0.049	0.026		58.6	0.0363	0.0406	0.0289	0.0267	0.0233	0.0307	0.0278	0.0176		0.034	0.0388	0.0294	0.0244	0.0215	0.0301	0.0265	0.0152		0.0311	0.0363	0.0291	0.0222	0.0194	0.0286	0.024	0.0136		0.0195	0.02
58.8	0.03721	0.04937	0.02144	0.02091	0.02495	0.02792	0.02153	0.01666		20.75	0.064	0.071	0.056	0.051	0.045	0.048	0.049	0.026		58.8	0.0365	0.0406	0.0292	0.0267	0.0233	0.0307	0.0279	0.0172		0.034	0.0388	0.0295	0.0243	0.0214	0.0301	0.0265	0.0152		0.0312	0.0363	0.0291	0.0221	0.0194	0.0286	0.024	0.0136		0.0195	0.02
59	0.03686	0.04882	0.02369	0.02296	0.0258	0.03112	0.02198	0.01726		20.8	0.063	0.071	0.056	0.051	0.044	0.048	0.049	0.026		59	0.0363	0.0411	0.0294	0.0265	0.0234	0.0305	0.0278	0.0171		0.034	0.0389	0.0296	0.0243	0.0213	0.0301	0.0264	0.0151		0.0312	0.0364	0.0292	0.0221	0.0194	0.0286	0.024	0.0136		0.0195	0.02
59.2	0.03836	0.04712	0.02344	0.02206	0.0274	0.02967	0.02228	0.01661		20.85	0.063	0.071	0.056	0.051	0.044	0.048	0.049	0.026		59.2	0.0361	0.0417	0.0298	0.0265	0.0234	0.0305	0.0276	0.0172		0.034	0.039	0.0297	0.0243	0.0213	0.0301	0.0264	0.015		0.0313	0.0366	0.0292	0.0221	0.0194	0.0285	0.024	0.0136		0.0195	0.02
59.4	0.03736	0.04587	0.02459	0.01946	0.02775	0.02847	0.02173	0.01706		20.9	0.063	0.071	0.056	0.05	0.044	0.048	0.049	0.025		59.4	0.0363	0.0424	0.0299	0.0264	0.0234	0.0306	0.0274	0.0181		0.034	0.0393	0.0297	0.0244	0.0213	0.0302	0.0263	0.015		0.0313	0.0368	0.0293	0.0221	0.0194	0.0285	0.0239	0.0135		0.0195	0.02
59.6	0.03796	0.04642	0.02274	0.02311	0.02575	0.02852	0.02268	0.02011		20.95	0.063	0.071	0.056	0.051	0.044	0.048	0.049	0.025		59.6	0.0364	0.0427	0.0295	0.0265	0.0235	0.0307	0.0275	0.0192		0.0342	0.0398	0.0297	0.0245	0.0214	0.0302	0.0264	0.015		0.0314	0.0371	0.0294	0.0222	0.0194	0.0285	0.0239	0.0135		0.0195	0.02
59.8	0.03706	0.04827	0.02204	0.02016	0.03275	0.02817	0.02248	0.01871		21	0.063	0.071	0.056	0.051	0.044	0.048	0.049	0.026		59.8	0.0366	0.0427	0.0295	0.0266	0.0235	0.0309	0.0277	0.0186		0.0345	0.0401	0.0297	0.0245	0.0215	0.0303	0.0264	0.0152		0.0315	0.0373	0.0295	0.0222	0.0194	0.0286	0.0239	0.0135		0.0195	0.02
										21.05	0.063	0.071	0.056	0.051	0.044	0.048	0.049	0.025			0.0367	0.0426	0.0295	0.0266	0.0234	0.0311	0.0279	0.0184			0.0402	0.0299	0.0245	0.0215	0.0303	0.0265	0.0153		0.0316	0.0375	0.0296	0.0223	0.0194	0.0287	0.0239	0.0135		0.0195	0.02
										21.1	0.063	0.07	0.056	0.05	0.044	0.048	0.049	0.025
										21.15	0.063	0.07	0.056	0.05	0.043	0.048	0.048	0.025
										21.2	0.063	0.07	0.056	0.05	0.044	0.048	0.048	0.026
										21.25	0.063	0.07	0.056	0.05	0.043	0.047	0.048	0.026
										21.3	0.063	0.07	0.055	0.051	0.043	0.048	0.049	0.025
										21.35	0.063	0.07	0.055	0.05	0.044	0.048	0.048	0.025
										21.4	0.063	0.07	0.055	0.05	0.044	0.048	0.048	0.025
										21.45	0.063	0.07	0.056	0.05	0.043	0.048	0.048	0.025
										21.5	0.063	0.07	0.055	0.05	0.043	0.047	0.048	0.025
										21.55	0.063	0.07	0.055	0.05	0.043	0.048	0.048	0.025
										21.6	0.063	0.07	0.056	0.05	0.043	0.048	0.048	0.025
										21.65	0.063	0.07	0.055	0.05	0.044	0.048	0.048	0.025
										21.7	0.063	0.07	0.055	0.05	0.044	0.047	0.048	0.025
										21.75	0.063	0.07	0.055	0.05	0.043	0.047	0.048	0.025
										21.8	0.063	0.07	0.055	0.05	0.043	0.047	0.048	0.025
										21.85	0.063	0.07	0.055	0.05	0.043	0.048	0.048	0.025
										21.9	0.063	0.07	0.055	0.05	0.043	0.048	0.048	0.025
										21.95	0.063	0.07	0.055	0.05	0.044	0.047	0.048	0.025
										22	0.063	0.07	0.055	0.05	0.043	0.048	0.048	0.025
										22.05	0.063	0.07	0.055	0.05	0.043	0.047	0.047	0.025
										22.1	0.063	0.069	0.055	0.05	0.043	0.047	0.047	0.025
										22.15	0.063	0.069	0.055	0.05	0.043	0.047	0.048	0.025
										22.2	0.062	0.07	0.055	0.05	0.043	0.047	0.048	0.025
										22.25	0.062	0.069	0.055	0.05	0.043	0.047	0.047	0.025
										22.3	0.062	0.069	0.055	0.049	0.043	0.047	0.047	0.025
										22.35	0.062	0.069	0.054	0.049	0.043	0.047	0.047	0.025
										22.4	0.062	0.069	0.054	0.049	0.043	0.047	0.047	0.025
										22.45	0.062	0.069	0.054	0.049	0.043	0.047	0.047	0.025
										22.5	0.062	0.069	0.055	0.049	0.042	0.047	0.047	0.025
										22.55	0.062	0.069	0.054	0.049	0.043	0.047	0.047	0.025
										22.6	0.062	0.069	0.054	0.05	0.042	0.047	0.047	0.025
										22.65	0.062	0.069	0.054	0.05	0.042	0.047	0.047	0.024
										22.7	0.062	0.069	0.054	0.049	0.043	0.047	0.047	0.025
										22.75	0.062	0.069	0.054	0.049	0.042	0.047	0.047	0.025
										22.8	0.062	0.069	0.054	0.05	0.042	0.046	0.047	0.025
										22.85	0.062	0.069	0.054	0.05	0.042	0.047	0.047	0.025
										22.9	0.062	0.069	0.054	0.049	0.042	0.047	0.047	0.025
										22.95	0.062	0.069	0.054	0.049	0.042	0.046	0.047	0.024
										23	0.062	0.069	0.055	0.049	0.042	0.046	0.047	0.024
										23.05	0.062	0.069	0.054	0.049	0.042	0.046	0.047	0.025
										23.1	0.062	0.069	0.054	0.049	0.042	0.046	0.047	0.025
										23.15	0.061	0.069	0.054	0.049	0.042	0.046	0.047	0.025
										23.2	0.061	0.069	0.053	0.049	0.042	0.047	0.047	0.025
										23.25	0.061	0.069	0.054	0.049	0.042	0.046	0.047	0.025
										23.3	0.061	0.068	0.054	0.049	0.042	0.046	0.047	0.024
										23.35	0.061	0.069	0.054	0.049	0.042	0.047	0.047	0.024
										23.4	0.061	0.069	0.054	0.049	0.042	0.047	0.047	0.024
										23.45	0.061	0.068	0.054	0.049	0.042	0.046	0.047	0.024
										23.5	0.061	0.068	0.054	0.049	0.042	0.046	0.046	0.024
										23.55	0.061	0.069	0.054	0.049	0.042	0.046	0.047	0.024
										23.6	0.061	0.068	0.053	0.049	0.042	0.046	0.047	0.024
										23.65	0.061	0.068	0.054	0.049	0.041	0.046	0.046	0.024
										23.7	0.061	0.068	0.054	0.049	0.041	0.046	0.047	0.024
										23.75	0.061	0.068	0.053	0.049	0.041	0.046	0.047	0.024
										23.8	0.061	0.068	0.054	0.048	0.041	0.046	0.047	0.024
										23.85	0.061	0.068	0.053	0.049	0.042	0.046	0.047	0.024
										23.9	0.061	0.068	0.053	0.049	0.042	0.046	0.046	0.024
										23.95	0.061	0.068	0.054	0.048	0.042	0.046	0.046	0.024
										24	0.061	0.068	0.054	0.048	0.042	0.046	0.046	0.024
										24.05	0.061	0.068	0.053	0.048	0.042	0.046	0.046	0.024
										24.1	0.061	0.068	0.054	0.048	0.042	0.045	0.046	0.024
										24.15	0.061	0.068	0.053	0.048	0.042	0.046	0.046	0.024
										24.2	0.061	0.068	0.053	0.048	0.041	0.046	0.046	0.024
										24.25	0.061	0.068	0.053	0.048	0.041	0.046	0.046	0.024
										24.3	0.06	0.068	0.053	0.048	0.041	0.046	0.046	0.024
										24.35	0.06	0.068	0.053	0.048	0.041	0.045	0.046	0.024
										24.4	0.06	0.068	0.053	0.048	0.041	0.045	0.046	0.024
										24.45	0.06	0.067	0.053	0.048	0.042	0.046	0.046	0.024
										24.5	0.06	0.067	0.053	0.048	0.041	0.046	0.046	0.024
										24.55	0.06	0.067	0.053	0.048	0.041	0.045	0.046	0.024
										24.6	0.06	0.067	0.053	0.048	0.041	0.045	0.046	0.024
										24.65	0.06	0.067	0.053	0.048	0.041	0.046	0.046	0.024
										24.7	0.06	0.067	0.053	0.048	0.041	0.045	0.046	0.024
										24.75	0.06	0.067	0.053	0.048	0.041	0.045	0.046	0.024
										24.8	0.06	0.067	0.053	0.048	0.041	0.045	0.046	0.024
										24.85	0.06	0.067	0.053	0.048	0.041	0.045	0.046	0.024
										24.9	0.06	0.067	0.052	0.048	0.041	0.046	0.046	0.024
										24.95	0.06	0.067	0.053	0.048	0.041	0.045	0.046	0.024
										25	0.06	0.067	0.053	0.048	0.041	0.045	0.046	0.024
										25.05	0.06	0.067	0.053	0.047	0.041	0.045	0.046	0.024
										25.1	0.059	0.067	0.053	0.048	0.041	0.045	0.046	0.024
										25.15	0.059	0.067	0.053	0.048	0.041	0.045	0.046	0.024
										25.2	0.059	0.067	0.052	0.048	0.041	0.045	0.045	0.024
										25.25	0.059	0.067	0.052	0.048	0.041	0.045	0.046	0.024
										25.3	0.059	0.067	0.052	0.048	0.041	0.045	0.046	0.024
										25.35	0.059	0.066	0.052	0.048	0.041	0.045	0.046	0.024
										25.4	0.059	0.066	0.052	0.047	0.041	0.045	0.045	0.024
										25.45	0.059	0.066	0.052	0.048	0.04	0.045	0.045	0.024
										25.5	0.059	0.066	0.052	0.047	0.041	0.045	0.045	0.024
										25.55	0.059	0.066	0.052	0.047	0.04	0.045	0.045	0.024
										25.6	0.059	0.066	0.052	0.047	0.041	0.045	0.045	0.024
										25.65	0.059	0.066	0.052	0.047	0.041	0.045	0.045	0.024
										25.7	0.059	0.066	0.052	0.047	0.04	0.045	0.045	0.024
										25.75	0.059	0.066	0.052	0.047	0.04	0.045	0.045	0.024
										25.8	0.059	0.066	0.052	0.047	0.04	0.045	0.045	0.023
										25.85	0.059	0.066	0.052	0.047	0.04	0.045	0.045	0.023
										25.9	0.059	0.066	0.052	0.047	0.04	0.045	0.045	0.024
										25.95	0.059	0.066	0.052	0.047	0.04	0.045	0.045	0.024
										26	0.059	0.066	0.052	0.047	0.04	0.045	0.045	0.023
										26.05	0.059	0.066	0.052	0.047	0.041	0.045	0.045	0.023
										26.1	0.059	0.066	0.051	0.047	0.04	0.044	0.045	0.023
										26.15	0.059	0.066	0.052	0.047	0.04	0.044	0.045	0.024
										26.2	0.059	0.066	0.052	0.047	0.04	0.045	0.045	0.024
										26.25	0.059	0.066	0.052	0.047	0.04	0.045	0.045	0.023
										26.3	0.059	0.066	0.051	0.047	0.04	0.045	0.045	0.024
										26.35	0.058	0.066	0.052	0.047	0.04	0.044	0.045	0.024
										26.4	0.059	0.066	0.052	0.046	0.04	0.045	0.045	0.023
										26.45	0.059	0.066	0.051	0.047	0.04	0.045	0.045	0.023
										26.5	0.059	0.066	0.051	0.047	0.04	0.044	0.045	0.023
										26.55	0.058	0.065	0.052	0.046	0.04	0.044	0.044	0.023
										26.6	0.058	0.065	0.052	0.047	0.04	0.044	0.044	0.023
										26.65	0.058	0.065	0.052	0.047	0.04	0.044	0.044	0.023
										26.7	0.058	0.065	0.051	0.047	0.04	0.044	0.044	0.023
										26.75	0.058	0.065	0.051	0.046	0.04	0.044	0.044	0.023
										26.8	0.058	0.065	0.052	0.046	0.04	0.044	0.044	0.023
										26.85	0.058	0.065	0.051	0.047	0.04	0.044	0.044	0.023
										26.9	0.058	0.065	0.051	0.046	0.04	0.044	0.044	0.023
										26.95	0.058	0.065	0.051	0.046	0.04	0.044	0.044	0.023
										27	0.058	0.065	0.051	0.046	0.04	0.044	0.044	0.023
										27.05	0.058	0.065	0.051	0.046	0.04	0.044	0.044	0.023
										27.1	0.058	0.065	0.051	0.046	0.04	0.044	0.044	0.023
										27.15	0.058	0.065	0.051	0.046	0.04	0.044	0.044	0.023
										27.2	0.058	0.065	0.051	0.046	0.04	0.044	0.044	0.023
										27.25	0.058	0.065	0.051	0.046	0.04	0.044	0.044	0.023
										27.3	0.058	0.065	0.051	0.046	0.04	0.044	0.044	0.023
										27.35	0.058	0.065	0.051	0.046	0.039	0.044	0.044	0.023
										27.4	0.058	0.065	0.051	0.046	0.04	0.044	0.044	0.023
										27.45	0.058	0.065	0.051	0.046	0.04	0.044	0.044	0.023
										27.5	0.058	0.065	0.051	0.046	0.04	0.044	0.044	0.023
										27.55	0.058	0.065	0.051	0.046	0.04	0.044	0.044	0.023
										27.6	0.058	0.065	0.051	0.046	0.04	0.044	0.044	0.023
										27.65	0.058	0.064	0.051	0.046	0.039	0.044	0.044	0.023
										27.7	0.058	0.064	0.051	0.046	0.039	0.044	0.044	0.023
										27.75	0.057	0.065	0.051	0.046	0.039	0.044	0.044	0.023
										27.8	0.057	0.065	0.051	0.046	0.039	0.044	0.044	0.023
										27.85	0.057	0.064	0.05	0.046	0.039	0.043	0.044	0.023
										27.9	0.057	0.064	0.051	0.046	0.039	0.044	0.044	0.023
										27.95	0.057	0.064	0.051	0.046	0.039	0.043	0.044	0.023
										28	0.057	0.064	0.051	0.046	0.039	0.043	0.044	0.023
										28.05	0.057	0.064	0.051	0.046	0.039	0.044	0.044	0.023
										28.1	0.057	0.064	0.051	0.046	0.039	0.044	0.044	0.023
										28.15	0.057	0.064	0.051	0.046	0.039	0.044	0.044	0.023
										28.2	0.057	0.064	0.05	0.046	0.039	0.044	0.044	0.023
										28.25	0.057	0.063	0.05	0.046	0.039	0.043	0.044	0.023
										28.3	0.057	0.064	0.05	0.046	0.039	0.043	0.044	0.023
										28.35	0.057	0.064	0.05	0.045	0.039	0.043	0.043	0.023
										28.4	0.057	0.063	0.05	0.045	0.039	0.043	0.043	0.023
										28.45	0.056	0.063	0.05	0.045	0.039	0.043	0.043	0.023
										28.5	0.056	0.063	0.05	0.046	0.039	0.043	0.043	0.023
										28.55	0.056	0.063	0.05	0.046	0.039	0.043	0.043	0.023
										28.6	0.056	0.063	0.049	0.045	0.039	0.043	0.043	0.023
										28.65	0.056	0.063	0.05	0.045	0.039	0.043	0.043	0.023
										28.7	0.056	0.063	0.05	0.045	0.039	0.043	0.043	0.023
										28.75	0.056	0.063	0.05	0.045	0.039	0.043	0.043	0.023
										28.8	0.056	0.063	0.049	0.045	0.039	0.043	0.043	0.023
										28.85	0.056	0.063	0.05	0.045	0.039	0.043	0.043	0.023
										28.9	0.056	0.063	0.05	0.045	0.038	0.043	0.043	0.023
										28.95	0.055	0.062	0.049	0.045	0.039	0.043	0.043	0.023
										29	0.055	0.062	0.049	0.045	0.039	0.042	0.043	0.023
										29.05	0.055	0.062	0.05	0.045	0.038	0.042	0.043	0.023
										29.1	0.055	0.062	0.049	0.045	0.038	0.043	0.043	0.023
										29.15	0.055	0.062	0.049	0.045	0.038	0.043	0.043	0.022
										29.2	0.055	0.062	0.049	0.045	0.038	0.043	0.043	0.022
										29.25	0.055	0.062	0.049	0.045	0.038	0.042	0.043	0.022
										29.3	0.055	0.062	0.049	0.045	0.038	0.042	0.043	0.022
										29.35	0.055	0.062	0.049	0.044	0.038	0.042	0.043	0.022
										29.4	0.055	0.062	0.049	0.044	0.038	0.042	0.043	0.022
										29.45	0.055	0.062	0.049	0.044	0.038	0.042	0.043	0.022
										29.5	0.055	0.062	0.049	0.044	0.038	0.042	0.043	0.022
										29.55	0.055	0.062	0.049	0.044	0.038	0.042	0.043	0.022
										29.6	0.054	0.062	0.049	0.044	0.038	0.042	0.043	0.023
										29.65	0.054	0.062	0.048	0.044	0.037	0.042	0.043	0.023
										29.7	0.055	0.062	0.048	0.044	0.037	0.042	0.042	0.022
										29.75	0.054	0.062	0.049	0.044	0.038	0.042	0.042	0.022
										29.8	0.054	0.061	0.049	0.044	0.038	0.042	0.043	0.022
										29.85	0.054	0.061	0.048	0.044	0.038	0.042	0.042	0.022
										29.9	0.054	0.061	0.048	0.044	0.038	0.042	0.042	0.022
										29.95	0.054	0.061	0.049	0.044	0.038	0.042	0.042	0.022
										30	0.054	0.061	0.048	0.044	0.038	0.042	0.042	0.022
										30.05	0.054	0.061	0.048	0.044	0.038	0.042	0.042	0.022
										30.1	0.054	0.061	0.049	0.044	0.038	0.042	0.042	0.022
										30.15	0.054	0.061	0.049	0.044	0.038	0.042	0.042	0.022
										30.2	0.054	0.061	0.048	0.044	0.037	0.042	0.042	0.022
										30.25	0.054	0.061	0.048	0.044	0.038	0.042	0.042	0.022
										30.3	0.054	0.061	0.048	0.043	0.038	0.042	0.042	0.022
										30.35	0.054	0.061	0.048	0.043	0.037	0.042	0.042	0.022
										30.4	0.054	0.061	0.048	0.043	0.037	0.041	0.042	0.022
										30.45	0.054	0.061	0.048	0.043	0.037	0.042	0.042	0.022
										30.5	0.054	0.061	0.048	0.043	0.038	0.042	0.042	0.022
										30.55	0.054	0.061	0.048	0.044	0.037	0.042	0.042	0.022
										30.6	0.054	0.061	0.048	0.043	0.037	0.041	0.042	0.022
										30.65	0.054	0.061	0.048	0.043	0.037	0.041	0.042	0.022
										30.7	0.054	0.061	0.048	0.043	0.037	0.042	0.041	0.022
										30.75	0.054	0.061	0.048	0.043	0.037	0.042	0.042	0.022
										30.8	0.054	0.061	0.048	0.043	0.037	0.042	0.041	0.022
										30.85	0.054	0.061	0.048	0.043	0.037	0.042	0.041	0.021
										30.9	0.054	0.06	0.048	0.043	0.037	0.042	0.041	0.022
										30.95	0.054	0.06	0.047	0.043	0.037	0.041	0.041	0.022
										31	0.054	0.06	0.048	0.043	0.037	0.041	0.041	0.022
										31.05	0.054	0.06	0.048	0.043	0.037	0.041	0.041	0.021
										31.1	0.054	0.06	0.048	0.043	0.037	0.041	0.041	0.022
										31.15	0.054	0.06	0.047	0.043	0.037	0.041	0.041	0.022
										31.2	0.053	0.06	0.047	0.043	0.037	0.041	0.041	0.022
										31.25	0.053	0.06	0.047	0.043	0.037	0.041	0.041	0.022
										31.3	0.053	0.06	0.047	0.043	0.037	0.041	0.041	0.021
										31.35	0.053	0.06	0.048	0.043	0.037	0.041	0.041	0.021
										31.4	0.053	0.06	0.047	0.043	0.037	0.041	0.041	0.022
										31.45	0.053	0.06	0.047	0.043	0.037	0.041	0.041	0.022
										31.5	0.053	0.06	0.047	0.043	0.037	0.041	0.041	0.021
										31.55	0.053	0.06	0.047	0.043	0.036	0.04	0.041	0.021
										31.6	0.053	0.06	0.047	0.043	0.037	0.041	0.041	0.022
										31.65	0.053	0.06	0.048	0.043	0.036	0.041	0.041	0.022
										31.7	0.053	0.06	0.047	0.042	0.036	0.041	0.041	0.021
										31.75	0.053	0.06	0.047	0.042	0.036	0.041	0.041	0.021
										31.8	0.053	0.06	0.047	0.043	0.037	0.041	0.041	0.021
										31.85	0.053	0.06	0.047	0.042	0.036	0.04	0.041	0.021
										31.9	0.053	0.06	0.047	0.042	0.036	0.04	0.041	0.021
										31.95	0.053	0.06	0.047	0.042	0.036	0.041	0.041	0.021
										32	0.053	0.059	0.047	0.042	0.036	0.04	0.041	0.021
										32.05	0.052	0.059	0.047	0.042	0.036	0.04	0.041	0.021
										32.1	0.052	0.059	0.046	0.042	0.036	0.04	0.04	0.021
										32.15	0.052	0.059	0.047	0.042	0.036	0.041	0.04	0.021
										32.2	0.052	0.059	0.046	0.042	0.036	0.041	0.04	0.021
										32.25	0.052	0.059	0.047	0.042	0.036	0.041	0.041	0.021
										32.3	0.052	0.059	0.047	0.042	0.036	0.04	0.04	0.021
										32.35	0.052	0.059	0.047	0.042	0.036	0.04	0.04	0.021
										32.4	0.052	0.059	0.046	0.042	0.036	0.04	0.04	0.021
										32.45	0.052	0.059	0.047	0.042	0.036	0.04	0.041	0.021
										32.5	0.052	0.059	0.046	0.042	0.036	0.041	0.041	0.021
										32.55	0.052	0.058	0.046	0.042	0.036	0.041	0.04	0.021
										32.6	0.052	0.058	0.046	0.042	0.036	0.04	0.04	0.021
										32.65	0.051	0.058	0.046	0.042	0.036	0.04	0.04	0.021
										32.7	0.051	0.058	0.046	0.042	0.036	0.04	0.04	0.021
										32.75	0.051	0.058	0.046	0.041	0.036	0.04	0.04	0.021
										32.8	0.051	0.058	0.046	0.042	0.036	0.04	0.04	0.021
										32.85	0.051	0.058	0.046	0.042	0.035	0.04	0.04	0.021
										32.9	0.051	0.058	0.046	0.042	0.035	0.04	0.04	0.021
										32.95	0.051	0.058	0.046	0.042	0.035	0.04	0.04	0.021
										33	0.051	0.058	0.046	0.042	0.036	0.04	0.04	0.021
										33.05	0.051	0.058	0.046	0.042	0.036	0.039	0.04	0.021
										33.1	0.051	0.058	0.046	0.041	0.035	0.04	0.04	0.021
										33.15	0.051	0.058	0.046	0.041	0.035	0.04	0.04	0.021
										33.2	0.051	0.058	0.046	0.041	0.035	0.04	0.04	0.021
										33.25	0.051	0.058	0.046	0.041	0.035	0.039	0.04	0.021
										33.3	0.051	0.058	0.046	0.041	0.035	0.039	0.039	0.021
										33.35	0.05	0.058	0.046	0.041	0.035	0.04	0.039	0.021
										33.4	0.05	0.058	0.046	0.041	0.035	0.039	0.039	0.021
										33.45	0.05	0.057	0.045	0.041	0.035	0.039	0.039	0.021
										33.5	0.05	0.057	0.045	0.041	0.035	0.039	0.04	0.021
										33.55	0.05	0.058	0.045	0.041	0.035	0.039	0.039	0.021
										33.6	0.05	0.057	0.046	0.041	0.035	0.039	0.039	0.021
										33.65	0.05	0.057	0.045	0.041	0.035	0.039	0.039	0.021
										33.7	0.05	0.057	0.045	0.041	0.035	0.039	0.039	0.021
										33.75	0.05	0.057	0.045	0.041	0.035	0.039	0.039	0.021
										33.8	0.05	0.057	0.045	0.04	0.035	0.039	0.039	0.021
										33.85	0.05	0.057	0.045	0.04	0.035	0.039	0.039	0.021
										33.9	0.05	0.057	0.045	0.041	0.035	0.039	0.039	0.021
										33.95	0.05	0.057	0.045	0.041	0.035	0.039	0.039	0.02
										34	0.05	0.057	0.045	0.04	0.035	0.039	0.039	0.02
										34.05	0.05	0.057	0.045	0.04	0.035	0.039	0.039	0.021
										34.1	0.05	0.057	0.045	0.04	0.034	0.039	0.039	0.021
										34.15	0.05	0.057	0.045	0.04	0.034	0.039	0.039	0.02
										34.2	0.05	0.057	0.045	0.04	0.035	0.039	0.039	0.02
										34.25	0.05	0.056	0.045	0.04	0.034	0.039	0.039	0.02
										34.3	0.05	0.056	0.045	0.04	0.034	0.039	0.039	0.02
										34.35	0.05	0.056	0.045	0.04	0.035	0.039	0.039	0.021
										34.4	0.049	0.056	0.045	0.04	0.035	0.039	0.039	0.02
										34.45	0.049	0.056	0.045	0.04	0.034	0.039	0.039	0.02
										34.5	0.049	0.056	0.045	0.04	0.034	0.038	0.039	0.02
										34.55	0.049	0.056	0.044	0.04	0.034	0.039	0.038	0.02
										34.6	0.049	0.056	0.044	0.04	0.034	0.039	0.038	0.02
										34.65	0.049	0.056	0.044	0.04	0.034	0.038	0.038	0.02
										34.7	0.049	0.056	0.044	0.04	0.034	0.038	0.038	0.02
										34.75	0.049	0.056	0.044	0.04	0.034	0.038	0.038	0.02
										34.8	0.049	0.056	0.044	0.04	0.034	0.038	0.038	0.02
										34.85	0.049	0.056	0.044	0.04	0.034	0.038	0.038	0.02
										34.9	0.049	0.056	0.044	0.04	0.034	0.038	0.038	0.02
										34.95	0.049	0.056	0.044	0.04	0.034	0.038	0.038	0.02
										35	0.049	0.056	0.044	0.04	0.034	0.038	0.038	0.02
										35.05	0.049	0.056	0.044	0.04	0.034	0.038	0.038	0.02
										35.1	0.049	0.056	0.044	0.039	0.034	0.038	0.038	0.02
										35.15	0.049	0.056	0.044	0.039	0.034	0.038	0.038	0.02
										35.2	0.049	0.056	0.044	0.04	0.034	0.038	0.038	0.02
										35.25	0.049	0.055	0.044	0.039	0.034	0.038	0.038	0.02
										35.3	0.049	0.055	0.044	0.04	0.034	0.038	0.038	0.02
										35.35	0.048	0.055	0.044	0.039	0.034	0.038	0.038	0.02
										35.4	0.048	0.055	0.044	0.039	0.034	0.038	0.038	0.02
										35.45	0.048	0.055	0.044	0.039	0.034	0.038	0.038	0.02
										35.5	0.048	0.055	0.043	0.039	0.034	0.038	0.038	0.02
										35.55	0.048	0.055	0.044	0.039	0.034	0.038	0.038	0.02
										35.6	0.048	0.055	0.044	0.039	0.034	0.038	0.038	0.02
										35.65	0.048	0.055	0.044	0.039	0.033	0.038	0.038	0.02
										35.7	0.048	0.055	0.044	0.039	0.033	0.038	0.038	0.02
										35.75	0.048	0.055	0.044	0.039	0.034	0.038	0.037	0.02
										35.8	0.048	0.055	0.043	0.039	0.033	0.038	0.037	0.02
										35.85	0.048	0.054	0.043	0.039	0.033	0.037	0.037	0.02
										35.9	0.048	0.054	0.043	0.039	0.033	0.037	0.038	0.02
										35.95	0.048	0.054	0.043	0.039	0.034	0.037	0.038	0.02
										36	0.048	0.055	0.043	0.039	0.033	0.037	0.038	0.02
										36.05	0.047	0.055	0.043	0.039	0.033	0.037	0.037	0.02
										36.1	0.047	0.054	0.043	0.039	0.033	0.037	0.037	0.02
										36.15	0.047	0.054	0.043	0.039	0.033	0.037	0.037	0.02
										36.2	0.047	0.054	0.043	0.039	0.033	0.037	0.037	0.02
										36.25	0.047	0.054	0.043	0.039	0.033	0.037	0.037	0.02
										36.3	0.047	0.054	0.043	0.039	0.033	0.037	0.037	0.02
										36.35	0.047	0.054	0.043	0.039	0.033	0.037	0.037	0.02
										36.4	0.047	0.054	0.043	0.039	0.033	0.037	0.037	0.02
										36.45	0.047	0.054	0.043	0.038	0.033	0.037	0.037	0.02
										36.5	0.047	0.054	0.043	0.038	0.033	0.037	0.037	0.02
										36.55	0.047	0.054	0.043	0.038	0.033	0.037	0.037	0.019
										36.6	0.047	0.053	0.043	0.038	0.032	0.037	0.037	0.019
										36.65	0.047	0.053	0.043	0.038	0.032	0.037	0.037	0.02
										36.7	0.047	0.053	0.043	0.038	0.032	0.037	0.037	0.02
										36.75	0.047	0.053	0.043	0.038	0.032	0.037	0.037	0.019
										36.8	0.046	0.053	0.042	0.038	0.033	0.037	0.037	0.019
										36.85	0.046	0.053	0.042	0.038	0.032	0.037	0.037	0.019
										36.9	0.046	0.053	0.042	0.038	0.032	0.037	0.036	0.019
										36.95	0.046	0.053	0.042	0.038	0.032	0.037	0.036	0.019
										37	0.046	0.053	0.042	0.038	0.032	0.037	0.037	0.019
										37.05	0.046	0.053	0.042	0.038	0.032	0.037	0.037	0.019
										37.1	0.046	0.053	0.042	0.038	0.032	0.037	0.037	0.019
										37.15	0.046	0.053	0.042	0.038	0.032	0.036	0.036	0.019
										37.2	0.046	0.053	0.042	0.038	0.032	0.036	0.036	0.019
										37.25	0.046	0.053	0.042	0.037	0.032	0.036	0.036	0.019
										37.3	0.046	0.052	0.042	0.037	0.032	0.036	0.036	0.019
										37.35	0.045	0.052	0.042	0.038	0.032	0.036	0.036	0.019
										37.4	0.045	0.052	0.041	0.038	0.032	0.036	0.036	0.019
										37.45	0.045	0.052	0.042	0.037	0.032	0.036	0.036	0.019
										37.5	0.045	0.052	0.041	0.037	0.032	0.036	0.036	0.019
										37.55	0.045	0.052	0.042	0.037	0.032	0.036	0.036	0.019
										37.6	0.045	0.052	0.042	0.037	0.032	0.036	0.036	0.019
										37.65	0.045	0.052	0.041	0.037	0.032	0.036	0.036	0.019
										37.7	0.045	0.052	0.041	0.037	0.031	0.036	0.036	0.019
										37.75	0.045	0.052	0.041	0.037	0.031	0.036	0.036	0.019
										37.8	0.045	0.052	0.041	0.037	0.032	0.036	0.036	0.019
										37.85	0.045	0.052	0.041	0.037	0.032	0.036	0.036	0.019
										37.9	0.045	0.051	0.041	0.037	0.031	0.035	0.036	0.019
										37.95	0.045	0.051	0.041	0.037	0.031	0.035	0.036	0.019
										38	0.044	0.051	0.041	0.037	0.031	0.036	0.036	0.019
										38.05	0.044	0.051	0.041	0.037	0.031	0.036	0.036	0.019
										38.1	0.044	0.051	0.041	0.037	0.031	0.035	0.035	0.019
										38.15	0.044	0.051	0.041	0.037	0.031	0.035	0.035	0.019
										38.2	0.044	0.051	0.041	0.037	0.031	0.035	0.035	0.019
										38.25	0.044	0.051	0.041	0.037	0.031	0.035	0.035	0.019
										38.3	0.044	0.051	0.041	0.037	0.031	0.035	0.035	0.019
										38.35	0.044	0.051	0.041	0.037	0.031	0.036	0.035	0.019
										38.4	0.044	0.051	0.041	0.037	0.031	0.035	0.035	0.018
										38.45	0.044	0.051	0.04	0.037	0.031	0.035	0.035	0.019
										38.5	0.044	0.051	0.04	0.036	0.031	0.035	0.035	0.019
										38.55	0.044	0.051	0.04	0.036	0.031	0.035	0.035	0.019
										38.6	0.044	0.051	0.04	0.036	0.031	0.035	0.035	0.019
										38.65	0.044	0.051	0.04	0.036	0.031	0.035	0.035	0.018
										38.7	0.043	0.051	0.04	0.036	0.031	0.035	0.035	0.019
										38.75	0.043	0.05	0.04	0.036	0.031	0.035	0.035	0.018
										38.8	0.043	0.05	0.04	0.036	0.031	0.035	0.035	0.018
										38.85	0.043	0.05	0.04	0.036	0.031	0.035	0.035	0.018
										38.9	0.043	0.05	0.04	0.036	0.031	0.035	0.035	0.018
										38.95	0.043	0.05	0.04	0.036	0.031	0.034	0.035	0.018
										39	0.043	0.05	0.04	0.036	0.031	0.034	0.035	0.018
										39.05	0.043	0.05	0.04	0.036	0.03	0.035	0.035	0.018
										39.1	0.043	0.05	0.04	0.036	0.03	0.034	0.034	0.018
										39.15	0.043	0.05	0.04	0.036	0.03	0.034	0.034	0.018
										39.2	0.043	0.05	0.04	0.035	0.03	0.034	0.034	0.018
										39.25	0.043	0.05	0.04	0.035	0.03	0.034	0.034	0.018
										39.3	0.043	0.05	0.04	0.035	0.03	0.034	0.034	0.018
										39.35	0.043	0.05	0.04	0.035	0.03	0.034	0.034	0.018
										39.4	0.043	0.05	0.04	0.035	0.03	0.034	0.034	0.018
										39.45	0.043	0.049	0.04	0.035	0.03	0.034	0.034	0.018
										39.5	0.043	0.049	0.039	0.035	0.03	0.034	0.034	0.018
										39.55	0.043	0.049	0.039	0.035	0.03	0.034	0.034	0.018
										39.6	0.043	0.049	0.039	0.035	0.03	0.034	0.034	0.018
										39.65	0.043	0.049	0.039	0.035	0.03	0.034	0.034	0.018
										39.7	0.042	0.049	0.039	0.035	0.03	0.034	0.034	0.018
										39.75	0.042	0.049	0.039	0.035	0.03	0.034	0.034	0.018
										39.8	0.042	0.049	0.039	0.035	0.03	0.034	0.034	0.018
										39.85	0.042	0.049	0.039	0.035	0.03	0.034	0.034	0.018
										39.9	0.042	0.049	0.039	0.035	0.03	0.034	0.034	0.018
										39.95	0.042	0.049	0.039	0.035	0.03	0.034	0.034	0.018
										40	0.042	0.049	0.039	0.035	0.03	0.034	0.034	0.017
										40.05	0.042	0.049	0.039	0.035	0.03	0.034	0.034	0.018
										40.1	0.042	0.049	0.039	0.034	0.03	0.034	0.034	0.018
										40.15	0.042	0.049	0.039	0.035	0.03	0.034	0.033	0.018
										40.2	0.042	0.049	0.039	0.035	0.029	0.034	0.033	0.018
										40.25	0.042	0.049	0.039	0.035	0.03	0.034	0.034	0.018
										40.3	0.042	0.049	0.039	0.034	0.029	0.034	0.034	0.018
										40.35	0.042	0.049	0.039	0.034	0.029	0.034	0.033	0.018
										40.4	0.042	0.048	0.039	0.034	0.029	0.034	0.033	0.018
										40.45	0.042	0.048	0.038	0.034	0.029	0.033	0.033	0.018
										40.5	0.042	0.048	0.038	0.034	0.029	0.033	0.033	0.018
										40.55	0.042	0.048	0.038	0.034	0.029	0.033	0.033	0.017
										40.6	0.042	0.048	0.038	0.034	0.029	0.033	0.033	0.017
										40.65	0.041	0.048	0.038	0.034	0.029	0.033	0.033	0.017
										40.7	0.041	0.048	0.038	0.034	0.029	0.033	0.033	0.017
										40.75	0.041	0.048	0.038	0.034	0.029	0.033	0.033	0.017
										40.8	0.041	0.048	0.038	0.034	0.029	0.033	0.033	0.017
										40.85	0.041	0.048	0.038	0.034	0.029	0.033	0.033	0.017
										40.9	0.041	0.048	0.038	0.034	0.029	0.033	0.033	0.017
										40.95	0.041	0.048	0.038	0.034	0.029	0.033	0.033	0.017
										41	0.041	0.048	0.038	0.034	0.029	0.033	0.033	0.017
										41.05	0.041	0.048	0.038	0.034	0.029	0.033	0.033	0.017
										41.1	0.041	0.048	0.038	0.034	0.029	0.033	0.033	0.017
										41.15	0.041	0.048	0.038	0.034	0.028	0.033	0.032	0.017
										41.2	0.041	0.048	0.038	0.034	0.028	0.033	0.032	0.017
										41.25	0.041	0.048	0.038	0.034	0.028	0.033	0.032	0.017
										41.3	0.041	0.047	0.038	0.034	0.028	0.033	0.032	0.017
										41.35	0.041	0.047	0.038	0.034	0.028	0.033	0.032	0.017
										41.4	0.041	0.047	0.037	0.034	0.028	0.033	0.032	0.017
										41.45	0.041	0.047	0.038	0.033	0.028	0.033	0.032	0.017
										41.5	0.041	0.047	0.038	0.033	0.028	0.033	0.032	0.017
										41.55	0.04	0.047	0.037	0.033	0.028	0.033	0.032	0.017
										41.6	0.04	0.047	0.037	0.033	0.028	0.033	0.032	0.017
										41.65	0.04	0.047	0.037	0.033	0.028	0.033	0.032	0.017
										41.7	0.04	0.047	0.037	0.033	0.028	0.032	0.032	0.017
										41.75	0.04	0.047	0.037	0.033	0.028	0.032	0.032	0.017
										41.8	0.04	0.047	0.037	0.033	0.028	0.033	0.032	0.017
										41.85	0.04	0.047	0.037	0.033	0.028	0.033	0.032	0.017
										41.9	0.04	0.047	0.037	0.033	0.028	0.032	0.032	0.017
										41.95	0.04	0.047	0.037	0.033	0.028	0.032	0.032	0.017
										42	0.04	0.047	0.037	0.033	0.028	0.032	0.032	0.017
										42.05	0.04	0.047	0.037	0.033	0.028	0.032	0.032	0.017
										42.1	0.04	0.047	0.037	0.033	0.028	0.032	0.032	0.017
										42.15	0.04	0.047	0.037	0.033	0.028	0.032	0.032	0.017
										42.2	0.04	0.047	0.037	0.033	0.028	0.032	0.032	0.017
										42.25	0.04	0.046	0.037	0.033	0.028	0.032	0.032	0.017
										42.3	0.04	0.046	0.037	0.033	0.028	0.032	0.032	0.017
										42.35	0.039	0.046	0.037	0.033	0.027	0.032	0.032	0.017
										42.4	0.039	0.046	0.037	0.033	0.027	0.032	0.031	0.017
										42.45	0.039	0.046	0.037	0.033	0.028	0.032	0.031	0.017
										42.5	0.039	0.046	0.037	0.033	0.028	0.032	0.032	0.017
										42.55	0.039	0.046	0.037	0.033	0.028	0.032	0.032	0.017
										42.6	0.039	0.046	0.037	0.033	0.027	0.032	0.032	0.017
										42.65	0.039	0.046	0.037	0.032	0.027	0.032	0.031	0.017
										42.7	0.039	0.046	0.036	0.032	0.027	0.032	0.031	0.017
										42.75	0.039	0.046	0.036	0.032	0.027	0.032	0.031	0.017
										42.8	0.039	0.046	0.036	0.032	0.027	0.032	0.031	0.017
										42.85	0.039	0.046	0.036	0.032	0.027	0.032	0.031	0.016
										42.9	0.039	0.046	0.036	0.032	0.027	0.032	0.031	0.016
										42.95	0.039	0.046	0.036	0.032	0.027	0.031	0.031	0.017
										43	0.039	0.046	0.036	0.032	0.027	0.031	0.031	0.017
										43.05	0.039	0.046	0.036	0.032	0.027	0.031	0.031	0.016
										43.1	0.039	0.046	0.036	0.032	0.027	0.032	0.031	0.016
										43.15	0.039	0.046	0.036	0.032	0.027	0.031	0.031	0.016
										43.2	0.039	0.046	0.036	0.032	0.027	0.031	0.031	0.016
										43.25	0.039	0.046	0.036	0.032	0.027	0.031	0.031	0.016
										43.3	0.038	0.045	0.036	0.032	0.027	0.031	0.031	0.016
										43.35	0.038	0.045	0.036	0.032	0.027	0.031	0.031	0.016
										43.4	0.038	0.045	0.036	0.032	0.027	0.031	0.031	0.016
										43.45	0.038	0.045	0.036	0.032	0.027	0.031	0.031	0.016
										43.5	0.038	0.045	0.036	0.032	0.027	0.031	0.031	0.016
										43.55	0.038	0.045	0.036	0.032	0.027	0.031	0.031	0.016
										43.6	0.038	0.045	0.036	0.032	0.027	0.031	0.031	0.016
										43.65	0.038	0.045	0.036	0.032	0.027	0.031	0.031	0.016
										43.7	0.038	0.045	0.036	0.032	0.027	0.031	0.031	0.016
										43.75	0.038	0.045	0.036	0.032	0.027	0.031	0.031	0.016
										43.8	0.038	0.045	0.036	0.032	0.026	0.031	0.03	0.016
										43.85	0.038	0.045	0.036	0.031	0.026	0.031	0.031	0.016
										43.9	0.038	0.045	0.035	0.031	0.026	0.031	0.031	0.016
										43.95	0.038	0.045	0.035	0.031	0.026	0.031	0.031	0.016
										44	0.038	0.045	0.036	0.031	0.026	0.031	0.03	0.016
										44.05	0.038	0.045	0.035	0.031	0.026	0.031	0.03	0.016
										44.1	0.038	0.044	0.035	0.031	0.026	0.031	0.03	0.016
										44.15	0.038	0.044	0.035	0.031	0.026	0.031	0.03	0.016
										44.2	0.037	0.044	0.036	0.031	0.026	0.031	0.03	0.016
										44.25	0.037	0.044	0.035	0.031	0.026	0.031	0.03	0.016
										44.3	0.037	0.044	0.035	0.031	0.026	0.031	0.03	0.016
										44.35	0.037	0.044	0.035	0.031	0.026	0.03	0.03	0.016
										44.4	0.037	0.044	0.035	0.031	0.026	0.031	0.03	0.016
										44.45	0.037	0.044	0.035	0.031	0.026	0.031	0.03	0.016
										44.5	0.037	0.043	0.035	0.031	0.026	0.03	0.03	0.016
										44.55	0.037	0.043	0.035	0.031	0.026	0.03	0.03	0.016
										44.6	0.037	0.043	0.035	0.031	0.026	0.03	0.03	0.016
										44.65	0.037	0.043	0.035	0.031	0.026	0.03	0.03	0.016
										44.7	0.037	0.043	0.034	0.031	0.026	0.03	0.03	0.016
										44.75	0.037	0.043	0.035	0.031	0.026	0.03	0.03	0.016
										44.8	0.037	0.043	0.035	0.031	0.026	0.03	0.03	0.016
										44.85	0.036	0.043	0.034	0.031	0.026	0.03	0.03	0.016
										44.9	0.036	0.043	0.034	0.03	0.026	0.03	0.03	0.016
										44.95	0.036	0.043	0.034	0.03	0.026	0.03	0.03	0.016
										45	0.036	0.043	0.034	0.03	0.026	0.03	0.03	0.016
										45.05	0.036	0.043	0.034	0.03	0.025	0.03	0.03	0.016
										45.1	0.036	0.043	0.034	0.03	0.025	0.03	0.029	0.016
										45.15	0.036	0.043	0.034	0.031	0.026	0.03	0.029	0.015
										45.2	0.036	0.043	0.034	0.03	0.025	0.03	0.029	0.016
										45.25	0.036	0.043	0.034	0.03	0.025	0.03	0.029	0.016
										45.3	0.036	0.043	0.034	0.03	0.025	0.03	0.03	0.016
										45.35	0.036	0.043	0.034	0.03	0.025	0.029	0.029	0.016
										45.4	0.036	0.042	0.034	0.03	0.025	0.03	0.029	0.016
										45.45	0.036	0.042	0.034	0.03	0.025	0.029	0.029	0.016
										45.5	0.036	0.042	0.034	0.03	0.025	0.029	0.029	0.015
										45.55	0.036	0.042	0.034	0.03	0.025	0.029	0.029	0.015
										45.6	0.036	0.042	0.034	0.03	0.025	0.029	0.029	0.015
										45.65	0.035	0.042	0.034	0.03	0.025	0.029	0.029	0.015
										45.7	0.035	0.042	0.034	0.03	0.025	0.029	0.029	0.015
										45.75	0.035	0.042	0.033	0.03	0.025	0.029	0.029	0.015
										45.8	0.035	0.042	0.034	0.029	0.025	0.029	0.029	0.015
										45.85	0.035	0.042	0.033	0.029	0.025	0.029	0.029	0.015
										45.9	0.035	0.042	0.033	0.03	0.025	0.029	0.029	0.015
										45.95	0.035	0.042	0.033	0.029	0.025	0.029	0.029	0.015
										46	0.035	0.042	0.033	0.029	0.025	0.029	0.029	0.015
										46.05	0.035	0.042	0.033	0.029	0.025	0.029	0.029	0.015
										46.1	0.035	0.042	0.033	0.029	0.025	0.029	0.028	0.015
										46.15	0.035	0.042	0.033	0.029	0.025	0.029	0.029	0.015
										46.2	0.035	0.042	0.033	0.03	0.025	0.029	0.029	0.015
										46.25	0.035	0.042	0.033	0.029	0.025	0.029	0.029	0.015
										46.3	0.035	0.041	0.033	0.029	0.025	0.029	0.029	0.015
										46.35	0.035	0.041	0.033	0.029	0.025	0.029	0.028	0.015
										46.4	0.034	0.041	0.033	0.029	0.024	0.029	0.028	0.015
										46.45	0.034	0.041	0.033	0.029	0.024	0.029	0.028	0.015
										46.5	0.034	0.041	0.033	0.029	0.024	0.029	0.028	0.015
										46.55	0.034	0.041	0.033	0.029	0.024	0.029	0.028	0.015
										46.6	0.034	0.041	0.033	0.029	0.024	0.029	0.028	0.015
										46.65	0.034	0.041	0.033	0.029	0.024	0.029	0.028	0.015
										46.7	0.034	0.041	0.033	0.029	0.024	0.029	0.028	0.015
										46.75	0.034	0.041	0.033	0.029	0.024	0.029	0.028	0.015
										46.8	0.034	0.041	0.032	0.029	0.024	0.028	0.028	0.015
										46.85	0.034	0.041	0.033	0.029	0.024	0.028	0.028	0.015
										46.9	0.034	0.041	0.033	0.029	0.024	0.028	0.028	0.015
										46.95	0.034	0.04	0.032	0.029	0.024	0.028	0.028	0.015
										47	0.034	0.04	0.032	0.028	0.024	0.028	0.028	0.015
										47.05	0.034	0.04	0.032	0.028	0.024	0.028	0.028	0.015
										47.1	0.034	0.04	0.032	0.028	0.024	0.028	0.028	0.015
										47.15	0.034	0.04	0.032	0.028	0.024	0.028	0.028	0.015
										47.2	0.033	0.04	0.032	0.028	0.024	0.028	0.028	0.015
										47.25	0.033	0.04	0.032	0.028	0.024	0.028	0.028	0.015
										47.3	0.033	0.04	0.032	0.028	0.024	0.028	0.028	0.015
										47.35	0.033	0.04	0.032	0.028	0.024	0.028	0.027	0.015
										47.4	0.033	0.04	0.032	0.028	0.024	0.028	0.027	0.015
										47.45	0.033	0.04	0.032	0.028	0.023	0.028	0.027	0.015
										47.5	0.033	0.04	0.032	0.028	0.023	0.028	0.027	0.015
										47.55	0.033	0.04	0.032	0.028	0.023	0.028	0.027	0.015
										47.6	0.033	0.04	0.032	0.028	0.023	0.028	0.027	0.015
										47.65	0.033	0.04	0.032	0.028	0.023	0.027	0.027	0.015
										47.7	0.033	0.04	0.032	0.028	0.023	0.027	0.027	0.015
										47.75	0.033	0.04	0.032	0.028	0.023	0.028	0.027	0.014
										47.8	0.033	0.04	0.032	0.028	0.023	0.028	0.027	0.014
										47.85	0.033	0.04	0.031	0.028	0.023	0.027	0.027	0.014
										47.9	0.033	0.04	0.032	0.028	0.023	0.027	0.027	0.014
										47.95	0.033	0.04	0.031	0.028	0.023	0.027	0.027	0.014
										48	0.033	0.039	0.031	0.028	0.023	0.027	0.027	0.014
										48.05	0.033	0.04	0.032	0.027	0.023	0.027	0.027	0.014
										48.1	0.033	0.04	0.031	0.028	0.023	0.027	0.027	0.014
										48.15	0.033	0.039	0.031	0.027	0.023	0.027	0.027	0.014
										48.2	0.033	0.039	0.031	0.027	0.023	0.027	0.027	0.014
										48.25	0.033	0.039	0.031	0.027	0.023	0.027	0.027	0.014
										48.3	0.033	0.039	0.031	0.027	0.023	0.027	0.027	0.014
										48.35	0.033	0.039	0.031	0.027	0.023	0.027	0.027	0.014
										48.4	0.033	0.039	0.031	0.027	0.023	0.027	0.026	0.014
										48.45	0.032	0.039	0.031	0.027	0.023	0.027	0.027	0.014
										48.5	0.032	0.039	0.031	0.027	0.023	0.027	0.026	0.014
										48.55	0.032	0.039	0.031	0.027	0.023	0.027	0.026	0.014
										48.6	0.032	0.039	0.031	0.027	0.023	0.027	0.026	0.014
										48.65	0.032	0.039	0.031	0.027	0.023	0.027	0.026	0.014
										48.7	0.032	0.039	0.031	0.027	0.022	0.027	0.026	0.014
										48.75	0.032	0.039	0.031	0.027	0.022	0.027	0.026	0.014
										48.8	0.032	0.039	0.031	0.027	0.022	0.027	0.026	0.014
										48.85	0.032	0.039	0.031	0.027	0.022	0.027	0.026	0.014
										48.9	0.032	0.039	0.031	0.027	0.022	0.027	0.026	0.014
										48.95	0.032	0.039	0.031	0.027	0.022	0.027	0.026	0.014
										49	0.032	0.039	0.031	0.027	0.022	0.027	0.026	0.014
										49.05	0.032	0.039	0.031	0.027	0.022	0.027	0.026	0.014
										49.1	0.032	0.039	0.031	0.027	0.022	0.027	0.026	0.014
										49.15	0.032	0.039	0.031	0.027	0.022	0.027	0.026	0.014
										49.2	0.032	0.039	0.03	0.027	0.022	0.027	0.026	0.014
										49.25	0.032	0.039	0.031	0.027	0.022	0.027	0.026	0.014
										49.3	0.032	0.039	0.03	0.027	0.022	0.026	0.026	0.014
										49.35	0.032	0.039	0.03	0.026	0.022	0.026	0.026	0.014
										49.4	0.032	0.039	0.03	0.026	0.022	0.026	0.026	0.014
										49.45	0.032	0.039	0.03	0.026	0.022	0.026	0.026	0.014
										49.5	0.032	0.038	0.031	0.027	0.022	0.026	0.026	0.014
										49.55	0.032	0.038	0.03	0.027	0.022	0.026	0.026	0.014
										49.6	0.032	0.038	0.03	0.027	0.022	0.026	0.026	0.014
										49.65	0.032	0.039	0.03	0.026	0.022	0.026	0.026	0.014
										49.7	0.032	0.039	0.03	0.026	0.022	0.026	0.026	0.014
										49.75	0.032	0.039	0.03	0.026	0.022	0.026	0.026	0.014
										49.8	0.032	0.038	0.03	0.026	0.022	0.026	0.026	0.014
										49.85	0.032	0.038	0.03	0.026	0.022	0.026	0.026	0.014
										49.9	0.032	0.038	0.03	0.026	0.022	0.026	0.026	0.014
										49.95	0.031	0.038	0.03	0.026	0.022	0.026	0.026	0.014
										50	0.031	0.038	0.03	0.026	0.022	0.026	0.026	0.014
										50.05	0.031	0.038	0.03	0.026	0.022	0.026	0.026	0.014
										50.1	0.031	0.038	0.03	0.026	0.022	0.026	0.025	0.014
										50.15	0.031	0.038	0.03	0.026	0.022	0.026	0.025	0.014
										50.2	0.031	0.038	0.03	0.026	0.022	0.026	0.025	0.014
										50.25	0.031	0.038	0.03	0.026	0.022	0.026	0.025	0.014
										50.3	0.031	0.038	0.03	0.026	0.022	0.026	0.025	0.014
										50.35	0.031	0.038	0.03	0.026	0.022	0.026	0.025	0.014
										50.4	0.031	0.038	0.03	0.026	0.021	0.026	0.025	0.014
										50.45	0.031	0.038	0.03	0.026	0.021	0.026	0.025	0.014
										50.5	0.031	0.038	0.03	0.026	0.021	0.026	0.025	0.014
										50.55	0.031	0.038	0.03	0.026	0.021	0.026	0.025	0.014
										50.6	0.031	0.038	0.03	0.026	0.021	0.026	0.025	0.014
										50.65	0.031	0.038	0.03	0.026	0.021	0.025	0.025	0.013
										50.7	0.031	0.038	0.03	0.026	0.021	0.026	0.025	0.013
										50.75	0.031	0.038	0.03	0.026	0.021	0.026	0.025	0.013
										50.8	0.031	0.038	0.03	0.026	0.021	0.026	0.025	0.013
										50.85	0.031	0.038	0.03	0.026	0.021	0.026	0.025	0.013
										50.9	0.031	0.038	0.03	0.026	0.021	0.026	0.025	0.013
										50.95	0.031	0.038	0.03	0.026	0.021	0.026	0.025	0.013
										51	0.031	0.038	0.03	0.026	0.021	0.026	0.025	0.013
										51.05	0.031	0.038	0.03	0.026	0.021	0.025	0.025	0.013
										51.1	0.031	0.038	0.03	0.026	0.021	0.025	0.025	0.013
										51.15	0.031	0.038	0.029	0.026	0.021	0.025	0.025	0.013
										51.2	0.031	0.038	0.029	0.025	0.021	0.026	0.025	0.013
										51.25	0.031	0.038	0.03	0.025	0.021	0.026	0.025	0.013
										51.3	0.031	0.038	0.03	0.025	0.021	0.025	0.025	0.013
										51.35	0.031	0.038	0.029	0.025	0.021	0.025	0.025	0.013
										51.4	0.031	0.038	0.029	0.025	0.021	0.025	0.025	0.013
										51.45	0.031	0.038	0.029	0.026	0.021	0.025	0.025	0.013
										51.5	0.031	0.038	0.029	0.025	0.021	0.025	0.025	0.013
										51.55	0.031	0.038	0.029	0.025	0.021	0.025	0.025	0.013
										51.6	0.031	0.038	0.029	0.025	0.021	0.025	0.025	0.013
										51.65	0.031	0.038	0.029	0.025	0.021	0.025	0.025	0.013
										51.7	0.031	0.038	0.03	0.025	0.021	0.025	0.025	0.013
										51.75	0.031	0.038	0.03	0.025	0.021	0.025	0.025	0.013
										51.8	0.031	0.038	0.029	0.026	0.021	0.025	0.025	0.013
										51.85	0.031	0.038	0.029	0.025	0.021	0.025	0.025	0.013
										51.9	0.031	0.038	0.029	0.025	0.021	0.025	0.025	0.013
										51.95	0.031	0.038	0.029	0.025	0.021	0.025	0.025	0.013
										52	0.031	0.038	0.029	0.025	0.021	0.025	0.025	0.013
										52.05	0.031	0.038	0.029	0.025	0.021	0.025	0.025	0.013
										52.1	0.031	0.038	0.029	0.025	0.021	0.025	0.025	0.013
										52.15	0.031	0.038	0.029	0.025	0.021	0.025	0.025	0.013
										52.2	0.031	0.038	0.029	0.025	0.02	0.025	0.024	0.013
										52.25	0.031	0.038	0.029	0.025	0.021	0.025	0.024	0.013
										52.3	0.031	0.038	0.029	0.025	0.021	0.025	0.024	0.013
										52.35	0.031	0.038	0.029	0.025	0.02	0.025	0.024	0.013
										52.4	0.031	0.038	0.029	0.025	0.02	0.025	0.024	0.013
										52.45	0.031	0.038	0.029	0.025	0.02	0.025	0.024	0.013
										52.5	0.031	0.038	0.029	0.025	0.02	0.025	0.024	0.013
										52.55	0.031	0.038	0.029	0.025	0.02	0.025	0.024	0.013
										52.6	0.031	0.038	0.029	0.025	0.02	0.025	0.024	0.013
										52.65	0.031	0.038	0.029	0.025	0.02	0.025	0.024	0.013
										52.7	0.031	0.038	0.029	0.025	0.02	0.025	0.024	0.013
										52.75	0.031	0.038	0.029	0.025	0.02	0.025	0.024	0.013
										52.8	0.031	0.038	0.029	0.025	0.02	0.025	0.024	0.013
										52.85	0.031	0.038	0.029	0.025	0.02	0.025	0.024	0.013
										52.9	0.031	0.038	0.029	0.025	0.02	0.025	0.024	0.013
										52.95	0.03	0.038	0.029	0.025	0.02	0.025	0.024	0.013
										53	0.03	0.038	0.029	0.025	0.02	0.025	0.024	0.013
										53.05	0.03	0.038	0.029	0.025	0.02	0.025	0.024	0.013
										53.1	0.03	0.038	0.029	0.025	0.02	0.025	0.024	0.013
										53.15	0.03	0.038	0.029	0.025	0.02	0.025	0.024	0.013
										53.2	0.03	0.038	0.029	0.025	0.02	0.025	0.024	0.013
										53.25	0.03	0.038	0.029	0.025	0.02	0.025	0.024	0.013
										53.3	0.03	0.038	0.029	0.025	0.02	0.025	0.024	0.013
										53.35	0.03	0.038	0.029	0.025	0.02	0.025	0.024	0.013
										53.4	0.03	0.038	0.029	0.025	0.02	0.025	0.024	0.013
										53.45	0.03	0.038	0.029	0.025	0.02	0.025	0.024	0.013
										53.5	0.03	0.038	0.029	0.025	0.02	0.025	0.024	0.013
										53.55	0.03	0.038	0.029	0.025	0.02	0.025	0.024	0.013
										53.6	0.03	0.038	0.029	0.025	0.02	0.025	0.024	0.013
										53.65	0.031	0.038	0.029	0.025	0.02	0.025	0.024	0.013
										53.7	0.031	0.038	0.029	0.025	0.02	0.024	0.024	0.013
										53.75	0.031	0.038	0.029	0.025	0.02	0.025	0.024	0.013
										53.8	0.031	0.038	0.029	0.025	0.02	0.025	0.024	0.013
										53.85	0.031	0.038	0.029	0.025	0.02	0.024	0.024	0.013
										53.9	0.031	0.038	0.029	0.025	0.02	0.025	0.024	0.013
										53.95	0.031	0.038	0.029	0.025	0.02	0.025	0.024	0.013
										54	0.031	0.038	0.029	0.025	0.02	0.025	0.024	0.013
										54.05	0.031	0.038	0.029	0.025	0.02	0.025	0.024	0.013
										54.1	0.031	0.038	0.029	0.025	0.02	0.025	0.024	0.013
										54.15	0.031	0.038	0.029	0.025	0.02	0.025	0.024	0.013
										54.2	0.031	0.038	0.029	0.025	0.02	0.024	0.024	0.013
										54.25	0.031	0.038	0.029	0.025	0.02	0.024	0.024	0.013
										54.3	0.031	0.038	0.029	0.025	0.02	0.025	0.024	0.013
										54.35	0.031	0.038	0.029	0.025	0.02	0.025	0.024	0.013
										54.4	0.031	0.038	0.029	0.025	0.02	0.025	0.024	0.013
										54.45	0.031	0.038	0.029	0.025	0.02	0.025	0.024	0.013
										54.5	0.031	0.038	0.029	0.025	0.02	0.025	0.024	0.013
										54.55	0.031	0.038	0.029	0.025	0.02	0.025	0.024	0.013
										54.6	0.031	0.038	0.029	0.025	0.02	0.025	0.024	0.013
										54.65	0.031	0.038	0.029	0.025	0.02	0.025	0.024	0.013
										54.7	0.031	0.038	0.029	0.025	0.02	0.025	0.024	0.013
										54.75	0.031	0.038	0.029	0.025	0.02	0.025	0.024	0.013
										54.8	0.031	0.038	0.029	0.025	0.02	0.025	0.024	0.013
										54.85	0.031	0.038	0.029	0.025	0.02	0.025	0.024	0.013
										54.9	0.031	0.038	0.029	0.025	0.02	0.025	0.024	0.013
										54.95	0.031	0.038	0.029	0.025	0.02	0.025	0.024	0.013
										55	0.031	0.038	0.029	0.025	0.02	0.025	0.024	0.013
										55.05	0.031	0.038	0.029	0.025	0.02	0.025	0.024	0.013
										55.1	0.031	0.038	0.029	0.025	0.02	0.025	0.024	0.013
										55.15	0.031	0.038	0.029	0.025	0.02	0.025	0.024	0.013
										55.2	0.031	0.038	0.029	0.025	0.02	0.025	0.024	0.013
										55.25	0.031	0.038	0.029	0.025	0.02	0.025	0.024	0.013
										55.3	0.031	0.038	0.029	0.025	0.02	0.025	0.024	0.013
										55.35	0.031	0.038	0.029	0.025	0.02	0.025	0.024	0.013
										55.4	0.031	0.038	0.029	0.025	0.02	0.025	0.024	0.013
										55.45	0.031	0.038	0.029	0.025	0.02	0.025	0.024	0.013
										55.5	0.031	0.038	0.029	0.025	0.02	0.025	0.024	0.013
										55.55	0.031	0.038	0.029	0.025	0.02	0.025	0.024	0.013
										55.6	0.031	0.038	0.029	0.025	0.02	0.025	0.024	0.013
										55.65	0.031	0.038	0.029	0.025	0.02	0.025	0.024	0.013
										55.7	0.031	0.038	0.029	0.025	0.02	0.025	0.024	0.013
										55.75	0.031	0.038	0.029	0.025	0.02	0.025	0.024	0.013
										55.8	0.031	0.038	0.029	0.025	0.02	0.025	0.024	0.013
										55.85	0.031	0.038	0.029	0.025	0.02	0.025	0.024	0.013
										55.9	0.031	0.038	0.029	0.025	0.02	0.025	0.024	0.013
										55.95	0.031	0.038	0.029	0.025	0.02	0.025	0.024	0.013
										56	0.031	0.039	0.029	0.025	0.02	0.025	0.024	0.013
										56.05	0.031	0.039	0.029	0.025	0.02	0.025	0.024	0.013
										56.1	0.031	0.039	0.029	0.025	0.02	0.025	0.024	0.013
										56.15	0.031	0.039	0.029	0.025	0.02	0.025	0.024	0.013
										56.2	0.031	0.039	0.029	0.025	0.02	0.025	0.024	0.013
										56.25	0.031	0.039	0.029	0.025	0.02	0.025	0.024	0.013
										56.3	0.031	0.039	0.029	0.025	0.02	0.025	0.024	0.013
										56.35	0.031	0.039	0.029	0.025	0.02	0.025	0.024	0.013
										56.4	0.031	0.039	0.029	0.025	0.02	0.025	0.024	0.013
										56.45	0.031	0.039	0.029	0.025	0.02	0.025	0.024	0.013
										56.5	0.031	0.039	0.029	0.025	0.02	0.025	0.024	0.013
										56.55	0.031	0.039	0.029	0.025	0.02	0.025	0.024	0.013
										56.6	0.031	0.039	0.029	0.025	0.02	0.025	0.024	0.013
										56.65	0.031	0.039	0.029	0.025	0.02	0.025	0.024	0.013
										56.7	0.031	0.039	0.029	0.025	0.02	0.025	0.024	0.013
										56.75	0.031	0.039	0.029	0.025	0.02	0.025	0.024	0.013
										56.8	0.031	0.039	0.029	0.025	0.02	0.025	0.024	0.013
										56.85	0.032	0.039	0.029	0.025	0.02	0.025	0.024	0.013
										56.9	0.032	0.039	0.029	0.025	0.02	0.025	0.024	0.013
										56.95	0.031	0.039	0.03	0.025	0.02	0.025	0.024	0.013
										57	0.031	0.039	0.03	0.025	0.02	0.025	0.024	0.013
										57.05	0.032	0.039	0.03	0.025	0.02	0.025	0.024	0.013
										57.1	0.032	0.039	0.03	0.025	0.02	0.025	0.024	0.013
										57.15	0.032	0.039	0.03	0.025	0.02	0.025	0.024	0.013
										57.2	0.032	0.039	0.03	0.025	0.02	0.025	0.024	0.013
										57.25	0.032	0.039	0.03	0.025	0.02	0.025	0.024	0.013
										57.3	0.032	0.039	0.03	0.025	0.02	0.025	0.024	0.013
										57.35	0.032	0.039	0.03	0.025	0.02	0.025	0.024	0.013
										57.4	0.032	0.039	0.03	0.025	0.02	0.025	0.024	0.013
										57.45	0.032	0.039	0.03	0.025	0.02	0.025	0.024	0.013
										57.5	0.032	0.039	0.03	0.025	0.02	0.025	0.024	0.013
										57.55	0.032	0.039	0.03	0.025	0.02	0.025	0.024	0.013
										57.6	0.032	0.039	0.03	0.025	0.02	0.025	0.024	0.013
										57.65	0.032	0.039	0.03	0.025	0.02	0.025	0.024	0.013
										57.7	0.032	0.039	0.03	0.025	0.02	0.025	0.024	0.013
										57.75	0.032	0.039	0.03	0.025	0.02	0.025	0.024	0.013
										57.8	0.032	0.039	0.03	0.025	0.02	0.025	0.024	0.013
										57.85	0.032	0.039	0.03	0.025	0.02	0.025	0.024	0.013
										57.9	0.032	0.039	0.03	0.025	0.02	0.025	0.024	0.013
										57.95	0.032	0.039	0.03	0.025	0.02	0.025	0.024	0.013
										58	0.032	0.039	0.03	0.025	0.02	0.025	0.024	0.013
										58.05	0.032	0.039	0.03	0.025	0.02	0.025	0.024	0.013
										58.1	0.032	0.039	0.03	0.025	0.02	0.025	0.024	0.013
										58.15	0.032	0.039	0.03	0.025	0.02	0.025	0.024	0.013
										58.2	0.032	0.039	0.03	0.025	0.02	0.025	0.024	0.013
										58.25	0.032	0.039	0.03	0.025	0.02	0.025	0.024	0.013
										58.3	0.032	0.039	0.03	0.025	0.02	0.025	0.024	0.013
										58.35	0.032	0.039	0.03	0.025	0.02	0.025	0.024	0.013
										58.4	0.032	0.039	0.03	0.025	0.02	0.025	0.024	0.013
										58.45	0.032	0.039	0.03	0.025	0.02	0.025	0.024	0.013
										58.5	0.032	0.039	0.03	0.025	0.02	0.025	0.024	0.013
										58.55	0.032	0.039	0.03	0.025	0.02	0.025	0.024	0.013
										58.6	0.032	0.039	0.03	0.025	0.02	0.025	0.024	0.013
										58.65	0.032	0.039	0.03	0.025	0.02	0.025	0.024	0.013
										58.7	0.032	0.04	0.03	0.025	0.02	0.025	0.024	0.013
										58.75	0.032	0.04	0.03	0.025	0.02	0.025	0.024	0.013
										58.8	0.032	0.04	0.03	0.025	0.02	0.025	0.024	0.013
										58.85	0.032	0.04	0.03	0.025	0.02	0.025	0.024	0.013
										58.9	0.032	0.039	0.03	0.025	0.02	0.025	0.024	0.013
										58.95	0.032	0.039	0.03	0.025	0.02	0.025	0.024	0.013
										59	0.032	0.04	0.03	0.025	0.02	0.025	0.024	0.013
										59.05	0.032	0.04	0.03	0.025	0.02	0.025	0.024	0.013
										59.1	0.032	0.039	0.03	0.025	0.02	0.025	0.024	0.013
										59.15	0.032	0.039	0.03	0.025	0.02	0.025	0.024	0.013
										59.2	0.032	0.04	0.03	0.025	0.02	0.025	0.024	0.013
										59.25	0.032	0.04	0.03	0.025	0.02	0.025	0.024	0.013
										59.3	0.032	0.04	0.03	0.025	0.02	0.025	0.024	0.013
										59.35	0.032	0.04	0.03	0.025	0.02	0.025	0.024	0.013
										59.4	0.032	0.04	0.03	0.025	0.02	0.025	0.024	0.013
										59.45	0.032	0.04	0.03	0.025	0.02	0.025	0.024	0.013
										59.5	0.032	0.04	0.03	0.025	0.02	0.025	0.024	0.013
										59.55	0.032	0.04	0.03	0.025	0.02	0.025	0.024	0.013
										59.6	0.032	0.04	0.03	0.025	0.02	0.025	0.024	0.013
										59.65	0.032	0.04	0.03	0.025	0.02	0.025	0.024	0.013
										59.7	0.032	0.04	0.03	0.026	0.02	0.025	0.024	0.013
										59.75	0.032	0.04	0.03	0.025	0.02	0.025	0.024	0.013
										59.8	0.032	0.04	0.03	0.026	0.021	0.025	0.025	0.013
										59.85	0.032	0.04	0.03	0.026	0.02	0.025	0.025	0.013
										59.9	0.032	0.04	0.03	0.026	0.02	0.025	0.024	0.013
										59.95	0.032	0.04	0.03	0.026	0.02	0.025	0.024	0.013
										60	0.032	0.04	0.03	0.026	0.02	0.025	0.024	0.013
[truncated: 6 more columns]

## Sheet: RMSE_Meshsize0.1
t	S3	S4	S5	S6	S7	S8	S9	S10		t	HEC_P3	HEC_P4	HEC_P5	HEC_P6	HEC_P7	HEC_P8	HEC_P9	HEC_P10		Error 3	Error 4	Error 5	Error 6	Error 7	Error 8	Error 9	Error 10		Error ^2_3	Error ^2_4	Error ^2_5	Error ^2_6	Error ^2_7	Error ^2_8	Error ^2_9	Error ^2_10		RMSE 3	RMSE 4	RMSE 5	RMSE 6	RMSE 7	RMSE 8	RMSE 9	RMSE 10
0	0.00011	-8e-05	0.00039	6e-05	0	-3e-05	-7e-05	-4e-05		0	0	0	0	0	0	0	0	0		0.00011	-8e-05	0.00039	6e-05	0	-3e-05	-7e-05	-4e-05		1.21e-08	6.4e-09	1.521e-07	3.6e-09	0	9e-10	4.9e-09	1.6e-09		1.02108	1.33284	0.935831	0.617535	0.58577	0.740642	0.655167	0.302884
0.2	-0.00014	7e-05	-6e-05	0.00011	0	-3e-05	-7e-05	-9e-05		0.2	0	0	0	0	0	0	0	0		-0.00014	7e-05	-6e-05	0.00011	0	-3e-05	-7e-05	-9e-05		1.96e-08	4.9e-09	3.6e-09	1.21e-08	0	9e-10	4.9e-09	8.1e-09
0.4	-0.00014	-3e-05	-6e-05	6e-05	-0.00015	0.00012	-2e-05	-9e-05		0.4	0	0	0	0	0	0	0	0		-0.00014	-3e-05	-6e-05	6e-05	-0.00015	0.00012	-2e-05	-9e-05		1.96e-08	9e-10	3.6e-09	3.6e-09	2.25e-08	1.44e-08	4e-10	8.1e-09
0.6	6e-05	2e-05	-6e-05	6e-05	5e-05	-8e-05	3e-05	-9e-05		0.6	0	0	0	0	0	0	0	0		6e-05	2e-05	-6e-05	6e-05	5e-05	-8e-05	3e-05	-9e-05		3.6e-09	4e-10	3.6e-09	3.6e-09	2.5e-09	6.4e-09	9e-10	8.1e-09
0.8	1e-05	-0.00013	4e-05	6e-05	-5e-05	-3e-05	3e-05	-9e-05		0.8	0	0	0	0	0	0	0	0		1e-05	-0.00013	4e-05	6e-05	-5e-05	-3e-05	3e-05	-9e-05		1e-10	1.69e-08	1.6e-09	3.6e-09	2.5e-09	9e-10	9e-10	8.1e-09
1	-0.00014	0.00017	-6e-05	6e-05	-0.00015	0.00012	3e-05	-0.00014		1	0	0	0	0	0	0	0	0		-0.00014	0.00017	-6e-05	6e-05	-0.00015	0.00012	3e-05	-0.00014		1.96e-08	2.89e-08	3.6e-09	3.6e-09	2.25e-08	1.44e-08	9e-10	1.96e-08
1.2	1e-05	-3e-05	-0.00021	1e-05	0.0001	-3e-05	-2e-05	-0.00014		1.2	0	0	0	0	0	0	0	0		1e-05	-3e-05	-0.00021	1e-05	0.0001	-3e-05	-2e-05	-0.00014		1e-10	9e-10	4.41e-08	1e-10	1e-08	9e-10	4e-10	1.96e-08
1.4	1e-05	-3e-05	9e-05	6e-05	0	-3e-05	-2e-05	-0.00014		1.4	0	0	0	0	0	0	0	0		1e-05	-3e-05	9e-05	6e-05	0	-3e-05	-2e-05	-0.00014		1e-10	9e-10	8.1e-09	3.6e-09	0	9e-10	4e-10	1.96e-08
1.6	0.00026	-0.00013	4e-05	-4e-05	-5e-05	0.00012	-2e-05	-0.00014		1.6	0	0	0	0	0	0	0	0		0.00026	-0.00013	4e-05	-4e-05	-5e-05	0.00012	-2e-05	-0.00014		6.76e-08	1.69e-08	1.6e-09	1.6e-09	2.5e-09	1.44e-08	4e-10	1.96e-08
1.8	1e-05	0.00027	-1e-05	-4e-05	0.0002	-0.00013	3e-05	-0.00014		1.8	0	0	0	0	0	0	0	0		1e-05	0.00027	-1e-05	-4e-05	0.0002	-0.00013	3e-05	-0.00014		1e-10	7.29e-08	1e-10	1.6e-09	4e-08	1.69e-08	9e-10	1.96e-08
2	-9e-05	2e-05	-1e-05	1e-05	0	-3e-05	0.00013	-9e-05		2	0	0	0	0	0	0	0	0		-9e-05	2e-05	-1e-05	1e-05	0	-3e-05	0.00013	-9e-05		8.1e-09	4e-10	1e-10	1e-10	0	9e-10	1.69e-08	8.1e-09
2.2	0.00011	-0.00018	-1e-05	-4e-05	0	0.00012	0.00013	-9e-05		2.2	0	0	0	0	0	0	0	0		0.00011	-0.00018	-1e-05	-4e-05	0	0.00012	0.00013	-9e-05		1.21e-08	3.24e-08	1e-10	1.6e-09	0	1.44e-08	1.69e-08	8.1e-09
2.4	1e-05	-0.00013	-1e-05	1e-05	-0.00015	-0.00013	0.00013	1e-05		2.4	0	0	0	0	0	0	0	0		1e-05	-0.00013	-1e-05	1e-05	-0.00015	-0.00013	0.00013	1e-05		1e-10	1.69e-08	1e-10	1e-10	2.25e-08	1.69e-08	1.69e-08	1e-10
2.6	-9e-05	0.00032	-0.00016	-4e-05	5e-05	7e-05	0.00023	0.00011		2.6	0	0	0	0	0	0	0	0		-9e-05	0.00032	-0.00016	-4e-05	5e-05	7e-05	0.00023	0.00011		8.1e-09	1.024e-07	2.56e-08	1.6e-09	2.5e-09	4.9e-09	5.29e-08	1.21e-08
2.8	0.00011	7e-05	4e-05	-4e-05	0	0.00012	-7e-05	0.00031		2.8	0	0	0	0	0	0	0	0		0.00011	7e-05	4e-05	-4e-05	0	0.00012	-7e-05	0.00031		1.21e-08	4.9e-09	1.6e-09	1.6e-09	0	1.44e-08	4.9e-09	9.61e-08
3	1e-05	-8e-05	4e-05	-4e-05	-0.00015	-0.00013	-0.00012	0.00021		3	0	0	0	0	0	0	0	0		1e-05	-8e-05	4e-05	-4e-05	-0.00015	-0.00013	-0.00012	0.00021		1e-10	6.4e-09	1.6e-09	1.6e-09	2.25e-08	1.69e-08	1.44e-08	4.41e-08
3.2	-0.00014	-0.00013	-0.00016	-9e-05	0.0001	-0.00013	-0.00012	0.00011		3.2	0	0	0	0	0	0	0	0		-0.00014	-0.00013	-0.00016	-9e-05	0.0001	-0.00013	-0.00012	0.00011		1.96e-08	1.69e-08	2.56e-08	8.1e-09	1e-08	1.69e-08	1.44e-08	1.21e-08
3.4	6e-05	0.00017	0.00034	-4e-05	0	0.00012	-7e-05	0.00011		3.4	0	0	0	0	0	0	0	0		6e-05	0.00017	0.00034	-4e-05	0	0.00012	-7e-05	0.00011		3.6e-09	2.89e-08	1.156e-07	1.6e-09	0	1.44e-08	4.9e-09	1.21e-08
3.6	1e-05	-3e-05	-6e-05	-9e-05	0	-0.00018	-7e-05	0.00016		3.6	0	0	0	0	0	0	0	0		1e-05	-3e-05	-6e-05	-9e-05	0	-0.00018	-7e-05	0.00016		1e-10	9e-10	3.6e-09	8.1e-09	0	3.24e-08	4.9e-09	2.56e-08
3.8	-0.00014	2e-05	-1e-05	-4e-05	0.0002	7e-05	-2e-05	0.00011		3.8	0	0	0	0	0	0	0	0		-0.00014	2e-05	-1e-05	-4e-05	0.0002	7e-05	-2e-05	0.00011		1.96e-08	4e-10	1e-10	1.6e-09	4e-08	4.9e-09	4e-10	1.21e-08
4	1e-05	-8e-05	-0.00016	-9e-05	0	2e-05	-2e-05	6e-05		4	0	0	0	0	0	0	0	0		1e-05	-8e-05	-0.00016	-9e-05	0	2e-05	-2e-05	6e-05		1e-10	6.4e-09	2.56e-08	8.1e-09	0	4e-10	4e-10	3.6e-09
4.2	-4e-05	7e-05	-1e-05	-9e-05	-5e-05	-0.00018	-0.00017	6e-05		4.2	0	0	0	0	0	0	0	0		-4e-05	7e-05	-1e-05	-9e-05	-5e-05	-0.00018	-0.00017	6e-05		1.6e-09	4.9e-09	1e-10	8.1e-09	2.5e-09	3.24e-08	2.89e-08	3.6e-09
4.4	0.00011	7e-05	-0.00016	-9e-05	5e-05	-8e-05	3e-05	6e-05		4.4	0	0	0	0	0	0	0	0		0.00011	7e-05	-0.00016	-9e-05	5e-05	-8e-05	3e-05	6e-05		1.21e-08	4.9e-09	2.56e-08	8.1e-09	2.5e-09	6.4e-09	9e-10	3.6e-09
4.6	-4e-05	-3e-05	-0.00021	-4e-05	5e-05	2e-05	3e-05	1e-05		4.6	0	0	0	0	0	0	0	0		-4e-05	-3e-05	-0.00021	-4e-05	5e-05	2e-05	3e-05	1e-05		1.6e-09	9e-10	4.41e-08	1.6e-09	2.5e-09	4e-10	9e-10	1e-10
4.8	-9e-05	-8e-05	4e-05	-4e-05	-5e-05	-0.00023	-2e-05	6e-05		4.8	0	0	0	0	0	0	0	0		-9e-05	-8e-05	4e-05	-4e-05	-5e-05	-0.00023	-2e-05	6e-05		8.1e-09	6.4e-09	1.6e-09	1.6e-09	2.5e-09	5.29e-08	4e-10	3.6e-09
5	0.00016	-8e-05	-6e-05	1e-05	-0.0002	-3e-05	3e-05	1e-05		5	0	0	0	0	0	0	0	0		0.00016	-8e-05	-6e-05	1e-05	-0.0002	-3e-05	3e-05	1e-05		2.56e-08	6.4e-09	3.6e-09	1e-10	4e-08	9e-10	9e-10	1e-10
5.2	-4e-05	7e-05	-0.00011	1e-05	5e-05	-3e-05	8e-05	1e-05		5.2	0	0	0	0	0	0	0	0		-4e-05	7e-05	-0.00011	1e-05	5e-05	-3e-05	8e-05	1e-05		1.6e-09	4.9e-09	1.21e-08	1e-10	2.5e-09	9e-10	6.4e-09	1e-10
5.4	-0.00014	2e-05	9e-05	-9e-05	-0.0001	-0.00018	8e-05	1e-05		5.4	0	0	0	0	0	0	0	0		-0.00014	2e-05	9e-05	-9e-05	-0.0001	-0.00018	8e-05	1e-05		1.96e-08	4e-10	8.1e-09	8.1e-09	1e-08	3.24e-08	6.4e-09	1e-10
5.6	6e-05	-3e-05	-6e-05	-0.00019	-0.0001	-0.00013	0.00013	-9e-05		5.6	0	0	0	0	0	0	0	0		6e-05	-3e-05	-6e-05	-0.00019	-0.0001	-0.00013	0.00013	-9e-05		3.6e-09	9e-10	3.6e-09	3.61e-08	1e-08	1.69e-08	1.69e-08	8.1e-09
5.8	1e-05	-8e-05	-6e-05	1e-05	0.0001	-8e-05	0.00033	-4e-05		5.8	0	0	0	0	0	0	0	0		1e-05	-8e-05	-6e-05	1e-05	0.0001	-8e-05	0.00033	-4e-05		1e-10	6.4e-09	3.6e-09	1e-10	1e-08	6.4e-09	1.089e-07	1.6e-09
6	-0.00014	7e-05	-0.00021	-4e-05	-0.0001	-3e-05	3e-05	1e-05		6	0	0	0	0	0	0	0	0		-0.00014	7e-05	-0.00021	-4e-05	-0.0001	-3e-05	3e-05	1e-05		1.96e-08	4.9e-09	4.41e-08	1.6e-09	1e-08	9e-10	9e-10	1e-10
6.2	6e-05	-3e-05	-1e-05	-4e-05	0	-0.00013	-0.00017	-4e-05		6.2	0	0	0	0	0	0	0	0		6e-05	-3e-05	-1e-05	-4e-05	0	-0.00013	-0.00017	-4e-05		3.6e-09	9e-10	1e-10	1.6e-09	0	1.69e-08	2.89e-08	1.6e-09
6.4	1e-05	-3e-05	4e-05	-4e-05	0.0002	2e-05	-0.00012	-4e-05		6.4	0	0	0	0	0	0	0	0		1e-05	-3e-05	4e-05	-4e-05	0.0002	2e-05	-0.00012	-4e-05		1e-10	9e-10	1.6e-09	1.6e-09	4e-08	4e-10	1.44e-08	1.6e-09
6.6	-0.00014	-0.00013	-0.00016	-4e-05	0	0.00032	-7e-05	1e-05		6.6	0	0	0	0	0	0	0	0		-0.00014	-0.00013	-0.00016	-4e-05	0	0.00032	-7e-05	1e-05		1.96e-08	1.69e-08	2.56e-08	1.6e-09	0	1.024e-07	4.9e-09	1e-10
6.8	1e-05	2e-05	0.00014	-9e-05	0	-0.00013	-7e-05	-4e-05		6.8	0	0	0	0	0	0	0	0		1e-05	2e-05	0.00014	-9e-05	0	-0.00013	-7e-05	-4e-05		1e-10	4e-10	1.96e-08	8.1e-09	0	1.69e-08	4.9e-09	1.6e-09
7	-4e-05	2e-05	-6e-05	-9e-05	-0.00015	-0.00018	-2e-05	1e-05		7	0	0	0	0	0	0	0	0		-4e-05	2e-05	-6e-05	-9e-05	-0.00015	-0.00018	-2e-05	1e-05		1.6e-09	4e-10	3.6e-09	8.1e-09	2.25e-08	3.24e-08	4e-10	1e-10
7.2	6e-05	-0.00013	-6e-05	-4e-05	5e-05	-3e-05	-2e-05	-4e-05		7.2	0	0	0	0	0	0	0	0		6e-05	-0.00013	-6e-05	-4e-05	5e-05	-3e-05	-2e-05	-4e-05		3.6e-09	1.69e-08	3.6e-09	1.6e-09	2.5e-09	9e-10	4e-10	1.6e-09
7.4	1e-05	-0.00018	-0.00016	-9e-05	0	-0.00018	8e-05	-0.00014		7.4	0	0	0	0	0	0	0	0		1e-05	-0.00018	-0.00016	-9e-05	0	-0.00018	8e-05	-0.00014		1e-10	3.24e-08	2.56e-08	8.1e-09	0	3.24e-08	6.4e-09	1.96e-08
7.6	-9e-05	0.00012	-6e-05	-0.00014	-0.0002	-8e-05	3e-05	-4e-05		7.6	0	0	0	0	0	0	0	0		-9e-05	0.00012	-6e-05	-0.00014	-0.0002	-8e-05	3e-05	-4e-05		8.1e-09	1.44e-08	3.6e-09	1.96e-08	4e-08	6.4e-09	9e-10	1.6e-09
7.8	0.00011	2e-05	-0.00026	-4e-05	5e-05	2e-05	3e-05	1e-05		7.8	0	0	0	0	0	0	0	0		0.00011	2e-05	-0.00026	-4e-05	5e-05	2e-05	3e-05	1e-05		1.21e-08	4e-10	6.76e-08	1.6e-09	2.5e-09	4e-10	9e-10	1e-10
8	-4e-05	-3e-05	-0.00021	-0.00014	-5e-05	-0.00018	-2e-05	-4e-05		8	0	0	0	0	0	0	0	0		-4e-05	-3e-05	-0.00021	-0.00014	-5e-05	-0.00018	-2e-05	-4e-05		1.6e-09	9e-10	4.41e-08	1.96e-08	2.5e-09	3.24e-08	4e-10	1.6e-09
8.2	-0.00014	-0.00018	4e-05	-0.00014	-0.0001	-3e-05	-2e-05	-9e-05		8.2	0	0	0	0	0	0	0	0		-0.00014	-0.00018	4e-05	-0.00014	-0.0001	-3e-05	-2e-05	-9e-05		1.96e-08	3.24e-08	1.6e-09	1.96e-08	1e-08	9e-10	4e-10	8.1e-09
8.4	6e-05	7e-05	-6e-05	-0.00014	0.0001	2e-05	8e-05	-9e-05		8.4	0	0	0	0	0	0	0	0		6e-05	7e-05	-6e-05	-0.00014	0.0001	2e-05	8e-05	-9e-05		3.6e-09	4.9e-09	3.6e-09	1.96e-08	1e-08	4e-10	6.4e-09	8.1e-09
8.6	1e-05	-3e-05	-0.00016	-9e-05	-5e-05	-0.00023	8e-05	-9e-05		8.6	0	0	0	0	0	0	0	0		1e-05	-3e-05	-0.00016	-9e-05	-5e-05	-0.00023	8e-05	-9e-05		1e-10	9e-10	2.56e-08	8.1e-09	2.5e-09	5.29e-08	6.4e-09	8.1e-09
8.8	-0.00014	-8e-05	0.00024	-0.00014	-5e-05	2e-05	8e-05	-0.00014		8.8	0	0	0	0	0	0	0	0		-0.00014	-8e-05	0.00024	-0.00014	-5e-05	2e-05	8e-05	-0.00014		1.96e-08	6.4e-09	5.76e-08	1.96e-08	2.5e-09	4e-10	6.4e-09	1.96e-08
9	6e-05	-0.00013	-6e-05	-0.00014	0	-3e-05	0.00013	-0.00014		9	0	0	0	0	0	0	0	0		6e-05	-0.00013	-6e-05	-0.00014	0	-3e-05	0.00013	-0.00014		3.6e-09	1.69e-08	3.6e-09	1.96e-08	0	9e-10	1.69e-08	1.96e-08
9.2	1e-05	0.00012	-6e-05	-0.00019	0	-0.00023	8e-05	-0.00014		9.2	0	0	0	0	0	0	0	0		1e-05	0.00012	-6e-05	-0.00019	0	-0.00023	8e-05	-0.00014		1e-10	1.44e-08	3.6e-09	3.61e-08	0	5.29e-08	6.4e-09	1.96e-08
9.4	-0.00014	-3e-05	-0.00021	-0.00019	0	-8e-05	-0.00012	-9e-05		9.4	0	0	0	0	0	0	0	0		-0.00014	-3e-05	-0.00021	-0.00019	0	-8e-05	-0.00012	-9e-05		1.96e-08	9e-10	4.41e-08	3.61e-08	0	6.4e-09	1.44e-08	8.1e-09
9.6	-4e-05	-8e-05	4e-05	-0.00019	-0.00015	-0.00013	-0.00012	-0.00014		9.6	0	0	0	0	0	0	0	0		-4e-05	-8e-05	4e-05	-0.00019	-0.00015	-0.00013	-0.00012	-0.00014		1.6e-09	6.4e-09	1.6e-09	3.61e-08	2.25e-08	1.69e-08	1.44e-08	1.96e-08
9.8	-4e-05	-0.00018	-1e-05	-0.00024	0	-0.00013	-0.00012	-0.00019		9.8	0	0	0	0	0	0	0	0		-4e-05	-0.00018	-1e-05	-0.00024	0	-0.00013	-0.00012	-0.00019		1.6e-09	3.24e-08	1e-10	5.76e-08	0	1.69e-08	1.44e-08	3.61e-08
10	1e-05	7e-05	-0.00021	-0.00019	-0.0002	-0.00013	-7e-05	-0.00014		10	0	0	0	0	0	0	0	0		1e-05	7e-05	-0.00021	-0.00019	-0.0002	-0.00013	-7e-05	-0.00014		1e-10	4.9e-09	4.41e-08	3.61e-08	4e-08	1.69e-08	4.9e-09	1.96e-08
10.2	-4e-05	-3e-05	9e-05	-0.00019	-0.0002	-8e-05	-7e-05	-0.00014		10.2	0	0	0	0	0	0	0	0		-4e-05	-3e-05	9e-05	-0.00019	-0.0002	-8e-05	-7e-05	-0.00014		1.6e-09	9e-10	8.1e-09	3.61e-08	4e-08	6.4e-09	4.9e-09	1.96e-08
10.4	-9e-05	-3e-05	-6e-05	-0.00024	5e-05	0.00027	-2e-05	-0.00019		10.4	0	0	0	0	0	0	0	0		-9e-05	-3e-05	-6e-05	-0.00024	5e-05	0.00027	-2e-05	-0.00019		8.1e-09	9e-10	3.6e-09	5.76e-08	2.5e-09	7.29e-08	4e-10	3.61e-08
10.6	0.00011	-0.00013	-0.00011	-0.00024	-0.0001	-0.00013	3e-05	-0.00014		10.6	0	0.0334	0	0	0	0	0	0		0.00011	-0.03353	-0.00011	-0.00024	-0.0001	-0.00013	3e-05	-0.00014		1.21e-08	0.00112426	1.21e-08	5.76e-08	1e-08	1.69e-08	9e-10	1.96e-08
10.8	-9e-05	0.00012	4e-05	-0.00024	-0.00015	-8e-05	-2e-05	-0.00019		10.8	0.0096	0.0653	0	0	0	0	0	0		-0.00969	-0.06518	4e-05	-0.00024	-0.00015	-8e-05	-2e-05	-0.00019		9.38961e-05	0.00424843	1.6e-09	5.76e-08	2.25e-08	6.4e-09	4e-10	3.61e-08
11	-9e-05	0.01222	-6e-05	-0.00024	0.00015	2e-05	-2e-05	-0.00014		11	0.0345	0.0797	0	0	0	0	0	0		-0.03459	-0.06748	-6e-05	-0.00024	0.00015	2e-05	-2e-05	-0.00014		0.00119647	0.00455355	3.6e-09	5.76e-08	2.25e-08	4e-10	4e-10	1.96e-08
11.2	0.00856	0.01177	-6e-05	-0.00034	0	-0.00013	-7e-05	-9e-05		11.2	0.0545	0.0709	0.0306	0	0	0	0	0		-0.04594	-0.05913	-0.03066	-0.00034	0	-0.00013	-7e-05	-9e-05		0.00211048	0.00349636	0.000940036	1.156e-07	0	1.69e-08	4.9e-09	8.1e-09
11.4	0.01061	0.01367	0.00559	-0.00024	-5e-05	-8e-05	8e-05	1e-05		11.4	0.0534	0.0773	0.0282	0	0	0	0	0		-0.04279	-0.06363	-0.02261	-0.00024	-5e-05	-8e-05	8e-05	1e-05		0.00183098	0.00404878	0.000511212	5.76e-08	2.5e-09	6.4e-09	6.4e-09	1e-10
11.6	0.01181	0.02292	0.01494	-0.00024	-0.0002	2e-05	3e-05	0.00011		11.6	0.0553	0.0765	0.0297	0	0	0	0	0		-0.04349	-0.05358	-0.01476	-0.00024	-0.0002	2e-05	3e-05	0.00011		0.00189138	0.00287082	0.000217858	5.76e-08	4e-08	4e-10	9e-10	1.21e-08
11.8	0.01331	0.03092	0.01844	-0.00029	5e-05	-0.00023	-2e-05	0.00026		11.8	0.0563	0.0798	0.0322	0.0064	0	0.0362	0	0		-0.04299	-0.04888	-0.01376	-0.00669	5e-05	-0.03643	-2e-05	0.00026		0.00184814	0.00238925	0.000189338	4.47561e-05	2.5e-09	0.00132714	4e-10	6.76e-08
12	0.01706	0.03382	0.01754	0.00066	0	0.00627	8e-05	0.00016		12	0.0628	0.0837	0.0387	0.0119	0	0.0328	0	0		-0.04574	-0.04988	-0.02116	-0.01124	0	-0.02653	8e-05	0.00016		0.00209215	0.00248801	0.000447746	0.000126338	0	0.000703841	6.4e-09	2.56e-08
12.2	0.01746	0.03642	0.01979	0.00136	-0.00015	0.01307	8e-05	0.00011		12.2	0.0642	0.081	0.0448	0.0298	0.0221	0.0365	0.0138	0		-0.04674	-0.04458	-0.02501	-0.02844	-0.02225	-0.02343	-0.01372	0.00011		0.00218463	0.00198738	0.0006255	0.000808834	0.000495063	0.000548965	0.000188238	1.21e-08
12.4	0.02076	0.04367	0.02344	0.00266	0.0067	0.01547	0.00033	6e-05		12.4	0.0625	0.0802	0.0405	0.0321	0.0245	0.0451	0.0058	0		-0.04174	-0.03653	-0.01706	-0.02944	-0.0178	-0.02963	-0.00547	6e-05		0.00174223	0.00133444	0.000291044	0.000866714	0.00031684	0.000877937	2.99209e-05	3.6e-09
12.6	0.02851	0.04817	0.02414	0.01246	0.0123	0.01622	0.00098	6e-05		12.6	0.0675	0.0844	0.0404	0.0305	0.0277	0.0471	0.0112	0		-0.03899	-0.03623	-0.01626	-0.01804	-0.0154	-0.03088	-0.01022	6e-05		0.00152022	0.00131261	0.000264388	0.000325442	0.00023716	0.000953574	0.000104448	3.6e-09
12.8	0.03826	0.06057	0.02669	0.01386	0.01965	0.01752	0.00308	1e-05		12.8	0.0689	0.0896	0.0408	0.0313	0.0314	0.0473	0.0274	0		-0.03064	-0.02903	-0.01411	-0.01744	-0.01175	-0.02978	-0.02432	1e-05		0.00093881	0.000842741	0.000199092	0.000304154	0.000138062	0.000886848	0.000591462	1e-10
13	0.04916	0.07412	0.02794	0.02156	0.02145	0.01862	0.00578	1e-05		13	0.0768	0.0877	0.0436	0.0319	0.0377	0.048	0.0312	0.0089		-0.02764	-0.01358	-0.01566	-0.01034	-0.01625	-0.02938	-0.02542	-0.00889		0.00076397	0.000184416	0.000245236	0.000106916	0.000264062	0.000863184	0.000646176	7.90321e-05
13.2	0.06541	0.07367	0.02954	0.01996	0.0256	0.01972	0.01258	-0.00124		13.2	0.0716	0.0867	0.0422	0.0352	0.0334	0.0492	0.03	0.0201		-0.00619	-0.01303	-0.01266	-0.01524	-0.0078	-0.02948	-0.01742	-0.02134		3.83161e-05	0.000169781	0.000160276	0.000232258	6.084e-05	0.00086907	0.000303456	0.000455396
13.4	0.08311	0.08617	0.03114	0.02486	0.02465	0.02162	0.01458	0.01201		13.4	0.0711	0.0882	0.0425	0.0413	0.038	0.0531	0.0305	0.022		0.01201	-0.00203	-0.01136	-0.01644	-0.01335	-0.03148	-0.01592	-0.00999		0.00014424	4.1209e-06	0.00012905	0.000270274	0.000178223	0.00099099	0.000253446	9.98001e-05
13.6	0.09356	0.10002	0.03409	0.02051	0.02425	0.02432	0.01683	0.01401		13.6	0.0716	0.088	0.0465	0.0399	0.0406	0.0537	0.0365	0.0216		0.02196	0.01202	-0.01241	-0.01939	-0.01635	-0.02938	-0.01967	-0.00759		0.000482242	0.00014448	0.000154008	0.000375972	0.000267322	0.000863184	0.000386909	5.76081e-05
13.8	0.09211	0.11207	0.03734	0.02026	0.0322	0.03217	0.01813	0.01666		13.8	0.071	0.0881	0.047	0.0382	0.0383	0.0535	0.039	0.0207		0.02111	0.02397	-0.00966	-0.01794	-0.0061	-0.02133	-0.02087	-0.00404		0.000445632	0.000574561	9.33156e-05	0.000321844	3.721e-05	0.000454969	0.000435557	1.63216e-05
14	0.08721	0.10767	0.03649	0.02336	0.02875	0.03472	0.01658	0.01921		14	0.0688	0.0911	0.0474	0.041	0.0382	0.0548	0.0361	0.0217		0.01841	0.01657	-0.01091	-0.01764	-0.00945	-0.02008	-0.01952	-0.00249		0.000338928	0.000274565	0.000119028	0.00031117	8.93025e-05	0.000403206	0.00038103	6.2001e-06
14.2	0.08866	0.08122	0.03739	0.02111	0.032	0.03662	0.02648	0.01711		14.2	0.0717	0.0926	0.0494	0.0396	0.0387	0.0556	0.0364	0.022		0.01696	-0.01138	-0.01201	-0.01849	-0.0067	-0.01898	-0.00992	-0.00489		0.000287642	0.000129504	0.00014424	0.00034188	4.489e-05	0.00036024	9.84064e-05	2.39121e-05
14.4	0.06751	0.05867	0.03899	0.02611	0.0382	0.03537	0.03343	0.01686		14.4	0.0755	0.0922	0.0489	0.0377	0.0412	0.0555	0.0371	0.0221		-0.00799	-0.03353	-0.00991	-0.01159	-0.003	-0.02013	-0.00367	-0.00524		6.38401e-05	0.00112426	9.82081e-05	0.000134328	9e-06	0.000405217	1.34689e-05	2.74576e-05
14.6	0.07586	0.06127	0.03879	0.02996	0.04085	0.03697	0.02658	0.01986		14.6	0.0749	0.0918	0.0479	0.0399	0.0403	0.0576	0.0379	0.0218		0.00096	-0.03053	-0.00911	-0.00994	0.00055	-0.02063	-0.01132	-0.00194		9.216e-07	0.000932081	8.29921e-05	9.88036e-05	3.025e-07	0.000425597	0.000128142	3.7636e-06
14.8	0.07081	0.06082	0.03624	0.02856	0.0364	0.04277	0.02558	0.02331		14.8	0.0746	0.0911	0.0472	0.0451	0.0424	0.0571	0.0423	0.0211		-0.00379	-0.03028	-0.01096	-0.01654	-0.006	-0.01433	-0.01672	0.00221		1.43641e-05	0.000916878	0.000120122	0.000273572	3.6e-05	0.000205349	0.000279558	4.8841e-06
15	0.05986	0.06542	0.03179	0.03486	0.04535	0.05187	0.03303	0.02011		15	0.0751	0.0922	0.0481	0.0465	0.045	0.0566	0.0431	0.0209		-0.01524	-0.02678	-0.01631	-0.01164	0.00035	-0.00473	-0.01007	-0.00079		0.000232258	0.000717168	0.000266016	0.00013549	1.225e-07	2.23729e-05	0.000101405	6.241e-07
15.2	0.05676	0.06552	0.03439	0.02776	0.04495	0.04847	0.03698	0.01876		15.2	0.0743	0.0953	0.0482	0.0455	0.0441	0.0558	0.0445	0.0226		-0.01754	-0.02978	-0.01381	-0.01774	0.00085	-0.00733	-0.00752	-0.00384		0.000307652	0.000886848	0.000190716	0.000314708	7.225e-07	5.37289e-05	5.65504e-05	1.47456e-05
15.4	0.05421	0.06997	0.03574	0.03796	0.0441	0.04777	0.03878	0.02191		15.4	0.0762	0.0944	0.0496	0.0453	0.0438	0.0557	0.0467	0.0244		-0.02199	-0.02443	-0.01386	-0.00734	0.0003	-0.00793	-0.00792	-0.00249		0.00048356	0.000596825	0.0001921	5.38756e-05	9e-08	6.28849e-05	6.27264e-05	6.2001e-06
15.6	0.05036	0.06872	0.03814	0.04091	0.0384	0.04587	0.03318	0.02261		15.6	0.0772	0.0941	0.0509	0.0459	0.043	0.0556	0.0472	0.0252		-0.02684	-0.02538	-0.01276	-0.00499	-0.0046	-0.00973	-0.01402	-0.00259		0.000720386	0.000644144	0.000162818	2.49001e-05	2.116e-05	9.46729e-05	0.00019656	6.7081e-06
15.8	0.06066	0.07227	0.04424	0.03876	0.04365	0.04272	0.03988	0.02541		15.8	0.0771	0.0942	0.053	0.0454	0.0435	0.0575	0.0455	0.0258		-0.01644	-0.02193	-0.00876	-0.00664	0.00015	-0.01478	-0.00562	-0.00039		0.000270274	0.000480925	7.67376e-05	4.40896e-05	2.25e-08	0.000218448	3.15844e-05	1.521e-07
16	0.06731	0.07332	0.03969	0.04041	0.0455	0.04337	0.03938	0.02546		16	0.0761	0.0943	0.0528	0.0468	0.0444	0.0578	0.0472	0.0262		-0.00879	-0.02098	-0.01311	-0.00639	0.0011	-0.01443	-0.00782	-0.00074		7.72641e-05	0.00044016	0.000171872	4.08321e-05	1.21e-06	0.000208225	6.11524e-05	5.476e-07
16.2	0.06436	0.06372	0.04259	0.03921	0.0442	0.04602	0.04133	0.03281		16.2	0.0767	0.0926	0.0521	0.0486	0.0448	0.0589	0.0479	0.0259		-0.01234	-0.02888	-0.00951	-0.00939	-0.0006	-0.01288	-0.00657	0.00691		0.000152276	0.000834054	9.04401e-05	8.81721e-05	3.6e-07	0.000165894	4.31649e-05	4.77481e-05
16.4	0.06821	0.07677	0.04159	0.04831	0.0434	0.04847	0.03748	0.03076		16.4	0.0764	0.0914	0.0525	0.0493	0.045	0.0589	0.0485	0.0264		-0.00819	-0.01463	-0.01091	-0.00099	-0.0016	-0.01043	-0.01102	0.00436		6.70761e-05	0.000214037	0.000119028	9.801e-07	2.56e-06	0.000108785	0.00012144	1.90096e-05
16.6	0.06966	0.08267	0.04069	0.04286	0.0529	0.05132	0.03973	0.02791		16.6	0.0742	0.0911	0.0513	0.0499	0.0457	0.0588	0.0478	0.0262		-0.00454	-0.00843	-0.01061	-0.00704	0.0072	-0.00748	-0.00807	0.00171		2.06116e-05	7.10649e-05	0.000112572	4.95616e-05	5.184e-05	5.59504e-05	6.51249e-05	2.9241e-06
16.8	0.07811	0.07867	0.04249	0.04676	0.05315	0.04997	0.03463	0.02311		16.8	0.0746	0.091	0.0506	0.0492	0.0469	0.0582	0.048	0.0262		0.00351	-0.01233	-0.00811	-0.00244	0.00625	-0.00823	-0.01337	-0.00309		1.23201e-05	0.000152029	6.57721e-05	5.9536e-06	3.90625e-05	6.77329e-05	0.000178757	9.5481e-06
17	0.08626	0.08157	0.03964	0.05101	0.0476	0.05247	0.04443	0.02456		17	0.0753	0.0887	0.0502	0.0473	0.0475	0.0575	0.0493	0.0262		0.01096	-0.00713	-0.01056	0.00371	0.0001	-0.00503	-0.00487	-0.00164		0.000120122	5.08369e-05	0.000111514	1.37641e-05	1e-08	2.53009e-05	2.37169e-05	2.6896e-06
17.2	0.08441	0.08422	0.03949	0.04191	0.04965	0.04977	0.04223	0.02706		17.2	0.0734	0.0875	0.0497	0.0474	0.0465	0.0567	0.051	0.0263		0.01101	-0.00328	-0.01021	-0.00549	0.00315	-0.00693	-0.00877	0.00076		0.00012122	1.07584e-05	0.000104244	3.01401e-05	9.9225e-06	4.80249e-05	7.69129e-05	5.776e-07
17.4	0.08701	0.08477	0.03994	0.04271	0.0484	0.05367	0.04253	0.02731		17.4	0.0726	0.0872	0.05	0.0479	0.0455	0.0566	0.0505	0.0267		0.01441	-0.00243	-0.01006	-0.00519	0.0029	-0.00293	-0.00797	0.00061		0.000207648	5.9049e-06	0.000101204	2.69361e-05	8.41e-06	8.5849e-06	6.35209e-05	3.721e-07
17.6	0.07881	0.08287	0.03749	0.03821	0.04505	0.05327	0.04738	0.03041		17.6	0.0717	0.0868	0.0501	0.0484	0.0449	0.0558	0.0497	0.0267		0.00711	-0.00393	-0.01261	-0.01019	0.00015	-0.00253	-0.00232	0.00371		5.05521e-05	1.54449e-05	0.000159012	0.000103836	2.25e-08	6.4009e-06	5.3824e-06	1.37641e-05
17.8	0.07731	0.08347	0.03819	0.04576	0.0425	0.05247	0.04328	0.03136		17.8	0.0709	0.0861	0.0496	0.0478	0.0439	0.0555	0.048	0.0271		0.00641	-0.00263	-0.01141	-0.00204	-0.0014	-0.00303	-0.00472	0.00426		4.10881e-05	6.9169e-06	0.000130188	4.1616e-06	1.96e-06	9.1809e-06	2.22784e-05	1.81476e-05
18	0.07666	0.08562	0.03779	0.04756	0.0511	0.05212	0.04523	0.02721		18	0.0688	0.0859	0.0501	0.0482	0.043	0.0551	0.0479	0.0281		0.00786	-0.00028	-0.01231	-0.00064	0.0081	-0.00298	-0.00267	-0.00089		6.17796e-05	7.84e-08	0.000151536	4.096e-07	6.561e-05	8.8804e-06	7.1289e-06	7.921e-07
18.2	0.07911	0.08342	0.03909	0.04761	0.051	0.05922	0.03873	0.02861		18.2	0.0685	0.0847	0.0507	0.0475	0.0431	0.0551	0.0487	0.0281		0.01061	-0.00128	-0.01161	0.00011	0.0079	0.00412	-0.00997	0.00051		0.000112572	1.6384e-06	0.000134792	1.21e-08	6.241e-05	1.69744e-05	9.94009e-05	2.601e-07
18.4	0.07806	0.07852	0.03529	0.04041	0.0569	0.05532	0.04853	0.02506		18.4	0.0691	0.0826	0.0502	0.0465	0.0431	0.0549	0.0493	0.0273		0.00896	-0.00408	-0.01491	-0.00609	0.0138	0.00042	-0.00077	-0.00224		8.02816e-05	1.66464e-05	0.000222308	3.70881e-05	0.00019044	1.764e-07	5.929e-07	5.0176e-06
18.6	0.07841	0.07867	0.03644	0.05411	0.04695	0.05227	0.04578	0.02576		18.6	0.0689	0.082	0.049	0.0459	0.0428	0.0552	0.0493	0.0264		0.00951	-0.00333	-0.01256	0.00821	0.00415	-0.00293	-0.00352	-0.00064		9.04401e-05	1.10889e-05	0.000157754	6.74041e-05	1.72225e-05	8.5849e-06	1.23904e-05	4.096e-07
18.8	0.08076	0.08132	0.03479	0.04241	0.05105	0.05247	0.04353	0.02801		18.8	0.069	0.081	0.0484	0.0456	0.0434	0.0546	0.0489	0.0268		0.01176	0.00032	-0.01361	-0.00319	0.00765	-0.00213	-0.00537	0.00121		0.000138298	1.024e-07	0.000185232	1.01761e-05	5.85225e-05	4.5369e-06	2.88369e-05	1.4641e-06
19	0.07706	0.08272	0.03654	0.04636	0.0543	0.06187	0.04563	0.02926		19	0.068	0.0799	0.0483	0.0459	0.0443	0.0538	0.0479	0.027		0.00906	0.00282	-0.01176	0.00046	0.01	0.00807	-0.00227	0.00226		8.20836e-05	7.9524e-06	0.000138298	2.116e-07	0.0001	6.51249e-05	5.1529e-06	5.1076e-06
19.2	0.07726	0.07862	0.03274	0.04636	0.0486	0.06807	0.05043	0.02821		19.2	0.0676	0.0792	0.049	0.0462	0.0443	0.0529	0.0477	0.0269		0.00966	-0.00058	-0.01626	0.00016	0.0043	0.01517	0.00273	0.00131		9.33156e-05	3.364e-07	0.000264388	2.56e-08	1.849e-05	0.000230129	7.4529e-06	1.7161e-06
19.4	0.07906	0.07647	0.03329	0.03971	0.0493	0.05462	0.04203	0.02636		19.4	0.0673	0.0788	0.0486	0.0465	0.0434	0.0523	0.0475	0.0252		0.01176	-0.00233	-0.01531	-0.00679	0.0059	0.00232	-0.00547	0.00116		0.000138298	5.4289e-06	0.000234396	4.61041e-05	3.481e-05	5.3824e-06	2.99209e-05	1.3456e-06
19.6	0.07561	0.08287	0.03539	0.04016	0.054	0.04997	0.04878	0.02656		19.6	0.067	0.0779	0.0472	0.0469	0.0427	0.0515	0.0471	0.0229		0.00861	0.00497	-0.01181	-0.00674	0.0113	-0.00153	0.00168	0.00366		7.41321e-05	2.47009e-05	0.000139476	4.54276e-05	0.00012769	2.3409e-06	2.8224e-06	1.33956e-05
19.8	0.06921	0.08357	0.03439	0.05011	0.05205	0.05162	0.03913	0.02651		19.8	0.0663	0.0773	0.0479	0.047	0.0419	0.0516	0.0467	0.0231		0.00291	0.00627	-0.01351	0.00311	0.01015	2e-05	-0.00757	0.00341		8.4681e-06	3.93129e-05	0.00018252	9.6721e-06	0.000103022	4e-10	5.73049e-05	1.16281e-05
20	0.07251	0.07517	0.03359	0.04581	0.0475	0.06012	0.04643	0.02841		20	0.0658	0.0782	0.049	0.0462	0.0416	0.0518	0.0472	0.0263		0.00671	-0.00303	-0.01541	-0.00039	0.0059	0.00832	-0.00077	0.00211		4.50241e-05	9.1809e-06	0.000237468	1.521e-07	3.481e-05	6.92224e-05	5.929e-07	4.4521e-06
20.2	0.07461	0.07322	0.03374	0.04361	0.04805	0.05912	0.04088	0.02961		20.2	0.0654	0.0777	0.0497	0.0454	0.0413	0.0522	0.0479	0.0264		0.00921	-0.00448	-0.01596	-0.00179	0.00675	0.00692	-0.00702	0.00321		8.48241e-05	2.00704e-05	0.000254722	3.2041e-06	4.55625e-05	4.78864e-05	4.92804e-05	1.03041e-05
20.4	0.07411	0.07272	0.03259	0.04481	0.04695	0.05577	0.04968	0.02836		20.4	0.0653	0.0762	0.0487	0.0444	0.0407	0.0532	0.0477	0.0239		0.00881	-0.00348	-0.01611	0.00041	0.00625	0.00257	0.00198	0.00446		7.76161e-05	1.21104e-05	0.000259532	1.681e-07	3.90625e-05	6.6049e-06	3.9204e-06	1.98916e-05
20.6	0.07051	0.06922	0.03459	0.04176	0.0447	0.05437	0.04268	0.02691		20.6	0.0647	0.0758	0.0468	0.0441	0.0411	0.0528	0.0477	0.0249		0.00581	-0.00658	-0.01221	-0.00234	0.0036	0.00157	-0.00502	0.00201		3.37561e-05	4.32964e-05	0.000149084	5.4756e-06	1.296e-05	2.4649e-06	2.52004e-05	4.0401e-06
20.8	0.07006	0.07247	0.03779	0.04531	0.04605	0.05012	0.03968	0.02541		20.8	0.0641	0.0755	0.0456	0.0442	0.0414	0.0519	0.0471	0.0249		0.00596	-0.00303	-0.00781	0.00111	0.00465	-0.00178	-0.00742	0.00051		3.55216e-05	9.1809e-06	6.09961e-05	1.2321e-06	2.16225e-05	3.1684e-06	5.50564e-05	2.601e-07
21	0.07141	0.06942	0.03589	0.04281	0.04915	0.04652	0.04328	0.02396		21	0.0639	0.0761	0.0456	0.045	0.0419	0.0505	0.0464	0.0247		0.00751	-0.00668	-0.00971	-0.00219	0.00725	-0.00398	-0.00312	-0.00074		5.64001e-05	4.46224e-05	9.42841e-05	4.7961e-06	5.25625e-05	1.58404e-05	9.7344e-06	5.476e-07
21.2	0.06961	0.07017	0.03404	0.04411	0.0502	0.05617	0.03663	0.02631		21.2	0.0631	0.0759	0.046	0.0456	0.042	0.0499	0.0456	0.0247		0.00651	-0.00573	-0.01196	-0.00149	0.0082	0.00627	-0.00897	0.00161		4.23801e-05	3.28329e-05	0.000143042	2.2201e-06	6.724e-05	3.93129e-05	8.04609e-05	2.5921e-06
21.4	0.06981	0.07657	0.03364	0.03941	0.05025	0.05207	0.04488	0.02836		21.4	0.0635	0.0753	0.046	0.0449	0.0412	0.0497	0.0455	0.0257		0.00631	0.00127	-0.01236	-0.00549	0.00905	0.00237	-0.00062	0.00266		3.98161e-05	1.6129e-06	0.00015277	3.01401e-05	8.19025e-05	5.6169e-06	3.844e-07	7.0756e-06
21.6	0.07291	0.08447	0.03209	0.04501	0.04885	0.04987	0.04598	0.02801		21.6	0.0625	0.0745	0.0461	0.0442	0.0405	0.0498	0.046	0.0263		0.01041	0.00997	-0.01401	0.00081	0.00835	7e-05	-2e-05	0.00171		0.000108368	9.94009e-05	0.00019628	6.561e-07	6.97225e-05	4.9e-09	4e-10	2.9241e-06
21.8	0.06981	0.07972	0.03409	0.04036	0.0446	0.05502	0.04103	0.02611		21.8	0.0617	0.0743	0.0458	0.044	0.0398	0.0507	0.0463	0.0232		0.00811	0.00542	-0.01171	-0.00364	0.0048	0.00432	-0.00527	0.00291		6.57721e-05	2.93764e-05	0.000137124	1.32496e-05	2.304e-05	1.86624e-05	2.77729e-05	8.4681e-06
22	0.06906	0.07917	0.03089	0.04221	0.04585	0.05482	0.04388	0.02666		22	0.0616	0.0738	0.0456	0.0432	0.0396	0.0508	0.0465	0.0242		0.00746	0.00537	-0.01471	-0.00099	0.00625	0.00402	-0.00262	0.00246		5.56516e-05	2.88369e-05	0.000216384	9.801e-07	3.90625e-05	1.61604e-05	6.8644e-06	6.0516e-06
22.2	0.06761	0.07577	0.03069	0.03986	0.0501	0.05122	0.03768	0.02606		22.2	0.061	0.0732	0.0451	0.0425	0.0394	0.0504	0.0463	0.0258		0.00661	0.00257	-0.01441	-0.00264	0.0107	0.00082	-0.00862	0.00026		4.36921e-05	6.6049e-06	0.000207648	6.9696e-06	0.00011449	6.724e-07	7.43044e-05	6.76e-08
22.4	0.07041	0.07037	0.03219	0.04101	0.0436	0.04952	0.04458	0.03166		22.4	0.0603	0.0731	0.0442	0.0421	0.0392	0.0494	0.046	0.0272		0.01011	-0.00273	-0.01201	-0.00109	0.0044	0.00012	-0.00142	0.00446		0.000102212	7.4529e-06	0.00014424	1.1881e-06	1.936e-05	1.44e-08	2.0164e-06	1.98916e-05
22.6	0.06881	0.07157	0.03089	0.04486	0.04545	0.05312	0.03978	0.02636		22.6	0.0603	0.0724	0.0436	0.0422	0.0394	0.0479	0.0452	0.0258		0.00851	-0.00083	-0.01271	0.00266	0.00605	0.00522	-0.00542	0.00056		7.24201e-05	6.889e-07	0.000161544	7.0756e-06	3.66025e-05	2.72484e-05	2.93764e-05	3.136e-07
22.8	0.06726	0.07132	0.02999	0.03686	0.0454	0.05347	0.04093	0.02656		22.8	0.0601	0.0716	0.0434	0.0429	0.0392	0.0467	0.0442	0.0234		0.00716	-0.00028	-0.01341	-0.00604	0.0062	0.00677	-0.00327	0.00316		5.12656e-05	7.84e-08	0.000179828	3.64816e-05	3.844e-05	4.58329e-05	1.06929e-05	9.9856e-06
23	0.06541	0.07512	0.03029	0.04761	0.0474	0.05477	0.03948	0.02391		23	0.0604	0.0708	0.0429	0.0427	0.0385	0.0468	0.0439	0.023		0.00501	0.00432	-0.01261	0.00491	0.0089	0.00797	-0.00442	0.00091		2.51001e-05	1.86624e-05	0.000159012	2.41081e-05	7.921e-05	6.35209e-05	1.95364e-05	8.281e-07
23.2	0.06816	0.07192	0.03129	0.03671	0.0513	0.04967	0.04133	0.02721		23.2	0.0595	0.0704	0.0433	0.0427	0.038	0.0474	0.0444	0.0251		0.00866	0.00152	-0.01201	-0.00599	0.0133	0.00227	-0.00307	0.00211		7.49956e-05	2.3104e-06	0.00014424	3.58801e-05	0.00017689	5.1529e-06	9.4249e-06	4.4521e-06
23.4	0.06706	0.07177	0.03264	0.04291	0.04185	0.05122	0.04348	0.02741		23.4	0.0589	0.0704	0.0442	0.0423	0.0377	0.0486	0.0447	0.0261		0.00816	0.00137	-0.01156	0.00061	0.00415	0.00262	-0.00122	0.00131		6.65856e-05	1.8769e-06	0.000133634	3.721e-07	1.72225e-05	6.8644e-06	1.4884e-06	1.7161e-06
23.6	0.06556	0.07472	0.03154	0.04106	0.04105	0.04547	0.03843	0.02836		23.6	0.0585	0.0699	0.045	0.0416	0.0377	0.0495	0.0442	0.0223		0.00706	0.00482	-0.01346	-0.00054	0.00335	-0.00403	-0.00577	0.00606		4.98436e-05	2.32324e-05	0.000181172	2.916e-07	1.12225e-05	1.62409e-05	3.32929e-05	3.67236e-05
23.8	0.06931	0.07867	0.03239	0.03876	0.0415	0.04672	0.04058	0.02721		23.8	0.0587	0.0695	0.0446	0.0409	0.0379	0.0501	0.0439	0.023		0.01061	0.00917	-0.01221	-0.00214	0.0036	-0.00338	-0.00332	0.00421		0.000112572	8.40889e-05	0.000149084	4.5796e-06	1.296e-05	1.14244e-05	1.10224e-05	1.77241e-05
24	0.06516	0.07277	0.03154	0.04006	0.04555	0.04922	0.03828	0.02461		24	0.0584	0.069	0.0432	0.0406	0.0383	0.0496	0.0439	0.0247		0.00676	0.00377	-0.01166	-0.00054	0.00725	-0.00038	-0.00562	-9e-05		4.56976e-05	1.42129e-05	0.000135956	2.916e-07	5.25625e-05	1.444e-07	3.15844e-05	8.1e-09
24.2	0.06541	0.06802	0.03074	0.03906	0.0509	0.04892	0.04143	0.02436		24.2	0.0578	0.0686	0.0423	0.0404	0.038	0.0483	0.0437	0.0241		0.00761	-0.00058	-0.01156	-0.00134	0.0129	0.00062	-0.00227	0.00026		5.79121e-05	3.364e-07	0.000133634	1.7956e-06	0.00016641	3.844e-07	5.1529e-06	6.76e-08
24.4	0.06706	0.07067	0.03139	0.03961	0.04015	0.04947	0.04038	0.02646		24.4	0.0579	0.0682	0.0422	0.0406	0.0377	0.0463	0.043	0.0194		0.00916	0.00247	-0.01081	-0.00099	0.00245	0.00317	-0.00262	0.00706		8.39056e-05	6.1009e-06	0.000116856	9.801e-07	6.0025e-06	1.00489e-05	6.8644e-06	4.98436e-05
24.6	0.06921	0.06927	0.03174	0.04081	0.04155	0.04947	0.03693	0.02791		24.6	0.0583	0.0683	0.0432	0.0413	0.0373	0.0446	0.0422	0.0193		0.01091	0.00097	-0.01146	-0.00049	0.00425	0.00487	-0.00527	0.00861		0.000119028	9.409e-07	0.000131332	2.401e-07	1.80625e-05	2.37169e-05	2.77729e-05	7.41321e-05
24.8	0.06461	0.07117	0.03129	0.03836	0.03905	0.04907	0.04058	0.02486		24.8	0.0577	0.0678	0.0435	0.0411	0.0369	0.0438	0.0416	0.0222		0.00691	0.00337	-0.01221	-0.00274	0.00215	0.00527	-0.00102	0.00266		4.77481e-05	1.13569e-05	0.000149084	7.5076e-06	4.6225e-06	2.77729e-05	1.0404e-06	7.0756e-06
25	0.06586	0.06962	0.03109	0.03606	0.04335	0.04432	0.04208	0.02516		25	0.0574	0.0668	0.0426	0.0408	0.0365	0.0441	0.0417	0.0243		0.00846	0.00282	-0.01151	-0.00474	0.00685	0.00022	0.00038	0.00086		7.15716e-05	7.9524e-06	0.00013248	2.24676e-05	4.69225e-05	4.84e-08	1.444e-07	7.396e-07
25.2	0.06271	0.06442	0.03309	0.03996	0.04475	0.04727	0.03873	0.02496		25.2	0.0571	0.0669	0.0429	0.0403	0.0364	0.0458	0.0431	0.0232		0.00561	-0.00248	-0.00981	-0.00034	0.00835	0.00147	-0.00437	0.00176		3.14721e-05	6.1504e-06	9.62361e-05	1.156e-07	6.97225e-05	2.1609e-06	1.90969e-05	3.0976e-06
25.4	0.06366	0.06572	0.03154	0.03616	0.0414	0.05037	0.03878	0.02496		25.4	0.057	0.0672	0.0434	0.0398	0.0362	0.0475	0.0439	0.0217		0.00666	-0.00148	-0.01186	-0.00364	0.0052	0.00287	-0.00512	0.00326		4.43556e-05	2.1904e-06	0.00014066	1.32496e-05	2.704e-05	8.2369e-06	2.62144e-05	1.06276e-05
25.6	0.06291	0.06462	0.03019	0.03946	0.04295	0.04717	0.04038	0.02716		25.6	0.057	0.0662	0.0432	0.0394	0.0361	0.0483	0.043	0.0228		0.00591	-0.00158	-0.01301	6e-05	0.00685	-0.00113	-0.00262	0.00436		3.49281e-05	2.4964e-06	0.00016926	3.6e-09	4.69225e-05	1.2769e-06	6.8644e-06	1.90096e-05
25.8	0.06586	0.06857	0.03134	0.03446	0.0444	0.04312	0.03753	0.02371		25.8	0.0569	0.0657	0.0431	0.0393	0.0365	0.0482	0.0417	0.0242		0.00896	0.00287	-0.01176	-0.00484	0.0079	-0.00508	-0.00417	-0.00049		8.02816e-05	8.2369e-06	0.000138298	2.34256e-05	6.241e-05	2.58064e-05	1.73889e-05	2.401e-07
26	0.06616	0.06957	0.03199	0.03601	0.0384	0.04022	0.03778	0.02631		26	0.0566	0.0658	0.0425	0.0394	0.0371	0.0471	0.0412	0.0238		0.00956	0.00377	-0.01051	-0.00339	0.0013	-0.00688	-0.00342	0.00251		9.13936e-05	1.42129e-05	0.00011046	1.14921e-05	1.69e-06	4.73344e-05	1.16964e-05	6.3001e-06
26.2	0.06071	0.06967	0.03084	0.03621	0.03635	0.04492	0.03953	0.02496		26.2	0.0564	0.0657	0.0427	0.0392	0.0369	0.046	0.0412	0.0196		0.00431	0.00397	-0.01186	-0.00299	-0.00055	-0.00108	-0.00167	0.00536		1.85761e-05	1.57609e-05	0.00014066	8.9401e-06	3.025e-07	1.1664e-06	2.7889e-06	2.87296e-05
26.4	0.06276	0.07107	0.03059	0.03476	0.0376	0.04987	0.03623	0.02441		26.4	0.0569	0.0647	0.0424	0.0395	0.0364	0.0447	0.0415	0.021		0.00586	0.00637	-0.01181	-0.00474	0.0012	0.00517	-0.00527	0.00341		3.43396e-05	4.05769e-05	0.000139476	2.24676e-05	1.44e-06	2.67289e-05	2.77729e-05	1.16281e-05
26.6	0.06461	0.06337	0.03094	0.03766	0.0405	0.04397	0.03733	0.02451		26.6	0.0566	0.0646	0.0416	0.0403	0.036	0.0439	0.0418	0.0241		0.00801	-0.00123	-0.01066	-0.00264	0.0045	7e-05	-0.00447	0.00041		6.41601e-05	1.5129e-06	0.000113636	6.9696e-06	2.025e-05	4.9e-09	1.99809e-05	1.681e-07
26.8	0.06291	0.06372	0.02989	0.03656	0.047	0.04287	0.03568	0.02191		26.8	0.0562	0.0652	0.0414	0.0406	0.0357	0.0437	0.0414	0.0231		0.00671	-0.00148	-0.01151	-0.00404	0.0113	-0.00083	-0.00572	-0.00119		4.50241e-05	2.1904e-06	0.00013248	1.63216e-05	0.00012769	6.889e-07	3.27184e-05	1.4161e-06
27	0.05966	0.06822	0.03214	0.03841	0.0413	0.04377	0.03543	0.02221		27	0.0561	0.0654	0.0422	0.0401	0.0358	0.0436	0.0409	0.0231		0.00356	0.00282	-0.01006	-0.00169	0.0055	0.00017	-0.00547	-0.00089		1.26736e-05	7.9524e-06	0.000101204	2.8561e-06	3.025e-05	2.89e-08	2.99209e-05	7.921e-07
27.2	0.06446	0.06877	0.02984	0.03771	0.0394	0.04657	0.03998	0.02356		27.2	0.0561	0.0649	0.0428	0.0397	0.0357	0.0445	0.0412	0.0197		0.00836	0.00387	-0.01296	-0.00199	0.0037	0.00207	-0.00122	0.00386		6.98896e-05	1.49769e-05	0.000167962	3.9601e-06	1.369e-05	4.2849e-06	1.4884e-06	1.48996e-05
27.4	0.06561	0.06682	0.03174	0.03806	0.03765	0.04262	0.03428	0.02361		27.4	0.0563	0.065	0.0427	0.0391	0.0355	0.0457	0.0416	0.0239		0.00931	0.00182	-0.01096	-0.00104	0.00215	-0.00308	-0.00732	-0.00029		8.66761e-05	3.3124e-06	0.000120122	1.0816e-06	4.6225e-06	9.4864e-06	5.35824e-05	8.41e-08
27.6	0.06211	0.07087	0.03374	0.03861	0.0442	0.04192	0.04008	0.02441		27.6	0.0562	0.0647	0.0423	0.0386	0.0353	0.0465	0.0418	0.0235		0.00591	0.00617	-0.00856	1e-05	0.0089	-0.00458	-0.00172	0.00091		3.49281e-05	3.80689e-05	7.32736e-05	1e-10	7.921e-05	2.09764e-05	2.9584e-06	8.281e-07
27.8	0.06216	0.06657	0.02934	0.03636	0.0425	0.04047	0.03368	0.02471		27.8	0.056	0.0643	0.042	0.0387	0.0354	0.0465	0.0417	0.02		0.00616	0.00227	-0.01266	-0.00234	0.0071	-0.00603	-0.00802	0.00471		3.79456e-05	5.1529e-06	0.000160276	5.4756e-06	5.041e-05	3.63609e-05	6.43204e-05	2.21841e-05
28	0.06066	0.06622	0.03049	0.03886	0.04095	0.04487	0.03913	0.02276		28	0.0559	0.0637	0.0419	0.0391	0.0358	0.046	0.0413	0.0213		0.00476	0.00252	-0.01141	-0.00024	0.00515	-0.00113	-0.00217	0.00146		2.26576e-05	6.3504e-06	0.000130188	5.76e-08	2.65225e-05	1.2769e-06	4.7089e-06	2.1316e-06
28.2	0.06221	0.06537	0.03129	0.03481	0.03705	0.04502	0.03293	0.02611		28.2	0.0556	0.0636	0.0419	0.0392	0.0359	0.0451	0.0409	0.024		0.00661	0.00177	-0.01061	-0.00439	0.00115	-8e-05	-0.00797	0.00211		4.36921e-05	3.1329e-06	0.000112572	1.92721e-05	1.3225e-06	6.4e-09	6.35209e-05	4.4521e-06
28.4	0.06071	0.06457	0.03234	0.03716	0.03525	0.04107	0.04073	0.02276		28.4	0.0552	0.0634	0.0415	0.0391	0.0359	0.0444	0.0407	0.0256		0.00551	0.00117	-0.00916	-0.00194	-0.00065	-0.00333	3e-05	-0.00284		3.03601e-05	1.3689e-06	8.39056e-05	3.7636e-06	4.225e-07	1.10889e-05	9e-10	8.0656e-06
28.6	0.06111	0.06277	0.03239	0.03946	0.0409	0.04297	0.03578	0.02521		28.6	0.055	0.0629	0.0414	0.0394	0.0356	0.0437	0.0408	0.0234		0.00611	-0.00013	-0.00901	6e-05	0.0053	-0.00073	-0.00502	0.00181		3.73321e-05	1.69e-08	8.11801e-05	3.6e-09	2.809e-05	5.329e-07	2.52004e-05	3.2761e-06
28.8	0.06111	0.05982	0.02999	0.03326	0.0371	0.04502	0.03608	0.02321		28.8	0.055	0.0633	0.0411	0.0393	0.0354	0.0434	0.0409	0.0185		0.00611	-0.00348	-0.01111	-0.00604	0.0017	0.00162	-0.00482	0.00471		3.73321e-05	1.21104e-05	0.000123432	3.64816e-05	2.89e-06	2.6244e-06	2.32324e-05	2.21841e-05
29	0.06246	0.06117	0.02999	0.03876	0.03765	0.04407	0.03348	0.02311		29	0.0549	0.0632	0.0412	0.0391	0.0352	0.0437	0.0408	0.0205		0.00756	-0.00203	-0.01121	-0.00034	0.00245	0.00037	-0.00732	0.00261		5.71536e-05	4.1209e-06	0.000125664	1.156e-07	6.0025e-06	1.369e-07	5.35824e-05	6.8121e-06
29.2	0.05706	0.06727	0.03174	0.03406	0.0342	0.04207	0.03653	0.02496		29.2	0.0553	0.0626	0.0417	0.0387	0.0349	0.0441	0.0406	0.0241		0.00176	0.00467	-0.00996	-0.00464	-0.0007	-0.00203	-0.00407	0.00086		3.0976e-06	2.18089e-05	9.92016e-05	2.15296e-05	4.9e-07	4.1209e-06	1.65649e-05	7.396e-07
29.4	0.06121	0.06727	0.02949	0.03786	0.0358	0.04107	0.03613	0.02216		29.4	0.0549	0.0626	0.0417	0.0383	0.0348	0.0445	0.0406	0.0244		0.00631	0.00467	-0.01221	-0.00044	0.001	-0.00343	-0.00447	-0.00224		3.98161e-05	2.18089e-05	0.000149084	1.936e-07	1e-06	1.17649e-05	1.99809e-05	5.0176e-06
29.6	0.05911	0.06512	0.03379	0.03436	0.0394	0.04022	0.03458	0.02436		29.6	0.0547	0.0628	0.0416	0.038	0.0346	0.045	0.0406	0.021		0.00441	0.00232	-0.00781	-0.00364	0.0048	-0.00478	-0.00602	0.00336		1.94481e-05	5.3824e-06	6.09961e-05	1.32496e-05	2.304e-05	2.28484e-05	3.62404e-05	1.12896e-05
29.8	0.06011	0.06682	0.03284	0.03486	0.0406	0.04437	0.03343	0.02131		29.8	0.0545	0.0625	0.0416	0.0379	0.0349	0.0449	0.0409	0.0216		0.00561	0.00432	-0.00876	-0.00304	0.0057	-0.00053	-0.00747	-0.00029		3.14721e-05	1.86624e-05	7.67376e-05	9.2416e-06	3.249e-05	2.809e-07	5.58009e-05	8.41e-08
30	0.05966	0.07052	0.02889	0.03951	0.04505	0.04197	0.03393	0.02361		30	0.0548	0.0622	0.0414	0.0382	0.0348	0.0446	0.0408	0.0236		0.00486	0.00832	-0.01251	0.00131	0.01025	-0.00263	-0.00687	1e-05		2.36196e-05	6.92224e-05	0.0001565	1.7161e-06	0.000105063	6.9169e-06	4.71969e-05	1e-10
30.2	0.06161	0.07612	0.02794	0.03181	0.04165	0.03877	0.03548	0.02586		30.2	0.0543	0.0615	0.041	0.0386	0.0348	0.0443	0.0405	0.0247		0.00731	0.01462	-0.01306	-0.00679	0.00685	-0.00553	-0.00502	0.00116		5.34361e-05	0.000213744	0.000170564	4.61041e-05	4.69225e-05	3.05809e-05	2.52004e-05	1.3456e-06
30.4	0.06101	0.06772	0.03264	0.03846	0.03925	0.04107	0.03428	0.02436		30.4	0.0541	0.0611	0.041	0.0384	0.0349	0.0439	0.0401	0.0199		0.00691	0.00662	-0.00836	6e-05	0.00435	-0.00283	-0.00582	0.00446		4.77481e-05	4.38244e-05	6.98896e-05	3.6e-09	1.89225e-05	8.0089e-06	3.38724e-05	1.98916e-05
30.6	0.05826	0.07232	0.03029	0.03391	0.041	0.04182	0.04083	0.02356		30.6	0.0541	0.0608	0.0409	0.0382	0.0349	0.0435	0.0399	0.0206		0.00416	0.01152	-0.01061	-0.00429	0.0061	-0.00168	0.00093	0.00296		1.73056e-05	0.00013271	0.000112572	1.84041e-05	3.721e-05	2.8224e-06	8.649e-07	8.7616e-06
30.8	0.06001	0.07132	0.03089	0.03396	0.03875	0.04072	0.02983	0.02346		30.8	0.0539	0.0607	0.0409	0.038	0.0348	0.0432	0.0402	0.0221		0.00611	0.01062	-0.01001	-0.00404	0.00395	-0.00248	-0.01037	0.00136		3.73321e-05	0.000112784	0.0001002	1.63216e-05	1.56025e-05	6.1504e-06	0.000107537	1.8496e-06
31	0.05866	0.07052	0.02904	0.03381	0.03685	0.04342	0.03828	0.02376		31	0.0536	0.0602	0.0408	0.0376	0.0345	0.0431	0.0402	0.0219		0.00506	0.01032	-0.01176	-0.00379	0.00235	0.00032	-0.00192	0.00186		2.56036e-05	0.000106502	0.000138298	1.43641e-05	5.5225e-06	1.024e-07	3.6864e-06	3.4596e-06
31.2	0.05781	0.07362	0.02839	0.03061	0.0382	0.04752	0.02913	0.02351		31.2	0.0536	0.0602	0.0406	0.0378	0.0343	0.0432	0.0401	0.0226		0.00421	0.01342	-0.01221	-0.00719	0.0039	0.00432	-0.01097	0.00091		1.77241e-05	0.000180096	0.000149084	5.16961e-05	1.521e-05	1.86624e-05	0.000120341	8.281e-07
31.4	0.05936	0.07617	0.02894	0.03806	0.0407	0.04087	0.03713	0.02391		31.4	0.0536	0.0604	0.0407	0.0376	0.0342	0.0433	0.0399	0.02		0.00576	0.01577	-0.01176	0.00046	0.0065	-0.00243	-0.00277	0.00391		3.31776e-05	0.000248693	0.000138298	2.116e-07	4.225e-05	5.9049e-06	7.6729e-06	1.52881e-05
31.6	0.05861	0.06992	0.02784	0.03126	0.04035	0.03712	0.03233	0.02171		31.6	0.0537	0.0598	0.041	0.0376	0.034	0.0431	0.0397	0.0222		0.00491	0.01012	-0.01316	-0.00634	0.00635	-0.00598	-0.00737	-0.00049		2.41081e-05	0.000102414	0.000173186	4.01956e-05	4.03225e-05	3.57604e-05	5.43169e-05	2.401e-07
31.8	0.05646	0.07137	0.02949	0.03446	0.04045	0.03722	0.02918	0.02281		31.8	0.0533	0.0594	0.0408	0.0375	0.0339	0.0431	0.0396	0.0248		0.00316	0.01197	-0.01131	-0.00304	0.00655	-0.00588	-0.01042	-0.00199		9.9856e-06	0.000143281	0.000127916	9.2416e-06	4.29025e-05	3.45744e-05	0.000108576	3.9601e-06
32	0.05936	0.07292	0.02984	0.03631	0.03635	0.04052	0.03813	0.02256		32	0.0529	0.0595	0.0407	0.0375	0.0341	0.0432	0.0397	0.0219		0.00646	0.01342	-0.01086	-0.00119	0.00225	-0.00268	-0.00157	0.00066		4.17316e-05	0.000180096	0.00011794	1.4161e-06	5.0625e-06	7.1824e-06	2.4649e-06	4.356e-07
32.2	0.05726	0.06657	0.02979	0.03276	0.03975	0.04292	0.03138	0.02606		32.2	0.0524	0.0591	0.0407	0.0374	0.0343	0.043	0.0399	0.0188		0.00486	0.00747	-0.01091	-0.00464	0.00545	-8e-05	-0.00852	0.00726		2.36196e-05	5.58009e-05	0.000119028	2.15296e-05	2.97025e-05	6.4e-09	7.25904e-05	5.27076e-05
32.4	0.05766	0.06392	0.02984	0.03556	0.0365	0.04242	0.03693	0.02411		32.4	0.0524	0.0587	0.0407	0.0373	0.0344	0.0426	0.0398	0.0217		0.00526	0.00522	-0.01086	-0.00174	0.0021	-0.00018	-0.00287	0.00241		2.76676e-05	2.72484e-05	0.00011794	3.0276e-06	4.41e-06	3.24e-08	8.2369e-06	5.8081e-06
32.6	0.05781	0.06422	0.03064	0.03301	0.039	0.03887	0.03263	0.02371		32.6	0.0518	0.0585	0.0402	0.0374	0.0342	0.0425	0.0396	0.0236		0.00601	0.00572	-0.00956	-0.00439	0.0048	-0.00363	-0.00697	0.00011		3.61201e-05	3.27184e-05	9.13936e-05	1.92721e-05	2.304e-05	1.31769e-05	4.85809e-05	1.21e-08
32.8	0.05606	0.06102	0.03024	0.03281	0.0426	0.03952	0.03323	0.02281		32.8	0.0517	0.0583	0.0399	0.0375	0.0341	0.0424	0.0393	0.0245		0.00436	0.00272	-0.00966	-0.00469	0.0085	-0.00288	-0.00607	-0.00169		1.90096e-05	7.3984e-06	9.33156e-05	2.19961e-05	7.225e-05	8.2944e-06	3.68449e-05	2.8561e-06
33	0.05911	0.05952	0.03084	0.03396	0.0392	0.03977	0.03233	0.02136		33	0.0514	0.0582	0.0396	0.0371	0.0338	0.0422	0.039	0.0218		0.00771	0.00132	-0.00876	-0.00314	0.0054	-0.00243	-0.00667	-0.00044		5.94441e-05	1.7424e-06	7.67376e-05	9.8596e-06	2.916e-05	5.9049e-06	4.44889e-05	1.936e-07
33.2	0.05706	0.05987	0.02869	0.03316	0.0393	0.04342	0.03408	0.02596		33.2	0.0513	0.0582	0.0393	0.0368	0.0336	0.042	0.0389	0.0201		0.00576	0.00167	-0.01061	-0.00364	0.0057	0.00142	-0.00482	0.00586		3.31776e-05	2.7889e-06	0.000112572	1.32496e-05	3.249e-05	2.0164e-06	2.32324e-05	3.43396e-05
33.4	0.05566	0.05787	0.02819	0.03431	0.0389	0.03677	0.03443	0.02316		33.4	0.0513	0.0583	0.0392	0.0368	0.0335	0.0417	0.039	0.0227		0.00436	-0.00043	-0.01101	-0.00249	0.0054	-0.00493	-0.00457	0.00046		1.90096e-05	1.849e-07	0.00012122	6.2001e-06	2.916e-05	2.43049e-05	2.08849e-05	2.116e-07
33.6	0.05606	0.05802	0.02864	0.02896	0.0377	0.04067	0.03203	0.02311		33.6	0.0508	0.058	0.039	0.0368	0.0334	0.0415	0.039	0.0241		0.00526	2e-05	-0.01036	-0.00784	0.0043	-0.00083	-0.00697	-0.00099		2.76676e-05	4e-10	0.00010733	6.14656e-05	1.849e-05	6.889e-07	4.85809e-05	9.801e-07
33.8	0.05616	0.05917	0.02969	0.03311	0.0391	0.03682	0.03008	0.02276		33.8	0.0509	0.0578	0.039	0.0368	0.0332	0.0416	0.0388	0.0229		0.00526	0.00137	-0.00931	-0.00369	0.0059	-0.00478	-0.00872	-0.00014		2.76676e-05	1.8769e-06	8.66761e-05	1.36161e-05	3.481e-05	2.28484e-05	7.60384e-05	1.96e-08
34	0.05671	0.06047	0.03054	0.03286	0.0429	0.03922	0.03838	0.02316		34	0.0505	0.0574	0.0386	0.0366	0.033	0.0415	0.0386	0.0206		0.00621	0.00307	-0.00806	-0.00374	0.0099	-0.00228	-0.00022	0.00256		3.85641e-05	9.4249e-06	6.49636e-05	1.39876e-05	9.801e-05	5.1984e-06	4.84e-08	6.5536e-06
34.2	0.05486	0.05972	0.02864	0.03146	0.0395	0.03892	0.02863	0.02171		34.2	0.0503	0.057	0.0386	0.0364	0.033	0.0416	0.0383	0.0213		0.00456	0.00272	-0.00996	-0.00494	0.0065	-0.00268	-0.00967	0.00041		2.07936e-05	7.3984e-06	9.92016e-05	2.44036e-05	4.225e-05	7.1824e-06	9.35089e-05	1.681e-07
34.4	0.05591	0.05852	0.02769	0.03331	0.0366	0.03942	0.03468	0.02446		34.4	0.0502	0.0566	0.0385	0.0363	0.033	0.0414	0.0384	0.0216		0.00571	0.00192	-0.01081	-0.00299	0.0036	-0.00198	-0.00372	0.00286		3.26041e-05	3.6864e-06	0.000116856	8.9401e-06	1.296e-05	3.9204e-06	1.38384e-05	8.1796e-06
34.6	0.05341	0.05747	0.02889	0.03051	0.03725	0.04417	0.03183	0.02241		34.6	0.0498	0.0563	0.0385	0.0363	0.033	0.0411	0.0384	0.0228		0.00361	0.00117	-0.00961	-0.00579	0.00425	0.00307	-0.00657	-0.00039		1.30321e-05	1.3689e-06	9.23521e-05	3.35241e-05	1.80625e-05	9.4249e-06	4.31649e-05	1.521e-07
34.8	0.05356	0.05652	0.02864	0.03361	0.0397	0.03727	0.03123	0.02036		34.8	0.0497	0.0558	0.0386	0.0363	0.0329	0.0408	0.0384	0.0246		0.00386	0.00072	-0.00996	-0.00269	0.0068	-0.00353	-0.00717	-0.00424		1.48996e-05	5.184e-07	9.92016e-05	7.2361e-06	4.624e-05	1.24609e-05	5.14089e-05	1.79776e-05
35	0.05476	0.05482	0.02704	0.02651	0.04025	0.03922	0.03588	0.02171		35	0.0493	0.056	0.0383	0.0361	0.0327	0.0407	0.0382	0.0238		0.00546	-0.00118	-0.01126	-0.00959	0.00755	-0.00148	-0.00232	-0.00209		2.98116e-05	1.3924e-06	0.000126788	9.19681e-05	5.70025e-05	2.1904e-06	5.3824e-06	4.3681e-06
35.2	0.05366	0.05547	0.02954	0.03546	0.0382	0.03662	0.02703	0.02286		35.2	0.049	0.0554	0.038	0.0359	0.0324	0.0406	0.038	0.0199		0.00466	7e-05	-0.00846	-0.00044	0.0058	-0.00398	-0.01097	0.00296		2.17156e-05	4.9e-09	7.15716e-05	1.936e-07	3.364e-05	1.58404e-05	0.000120341	8.7616e-06
35.4	0.05456	0.05482	0.03084	0.03031	0.04155	0.03972	0.03533	0.02326		35.4	0.0494	0.0553	0.038	0.0358	0.0322	0.0406	0.0378	0.0222		0.00516	-0.00048	-0.00716	-0.00549	0.00935	-0.00088	-0.00247	0.00106		2.66256e-05	2.304e-07	5.12656e-05	3.01401e-05	8.74225e-05	7.744e-07	6.1009e-06	1.1236e-06
35.6	0.05421	0.05647	0.03009	0.03031	0.03455	0.03802	0.03248	0.02221		35.6	0.049	0.0551	0.0372	0.0356	0.0322	0.0404	0.0376	0.023		0.00521	0.00137	-0.00711	-0.00529	0.00235	-0.00238	-0.00512	-0.00079		2.71441e-05	1.8769e-06	5.05521e-05	2.79841e-05	5.5225e-06	5.6644e-06	2.62144e-05	6.241e-07
35.8	0.05401	0.05667	0.02969	0.03036	0.0313	0.04117	0.03283	0.01891		35.8	0.0485	0.0547	0.0373	0.0356	0.032	0.0402	0.0375	0.023		0.00551	0.00197	-0.00761	-0.00524	-0.0007	0.00097	-0.00467	-0.00409		3.03601e-05	3.8809e-06	5.79121e-05	2.74576e-05	4.9e-07	9.409e-07	2.18089e-05	1.67281e-05
36	0.05351	0.05817	0.02669	0.02736	0.0355	0.04097	0.03093	0.02306		36	0.0483	0.0545	0.0373	0.0355	0.032	0.0399	0.0374	0.0191		0.00521	0.00367	-0.01061	-0.00814	0.0035	0.00107	-0.00647	0.00396		2.71441e-05	1.34689e-05	0.000112572	6.62596e-05	1.225e-05	1.1449e-06	4.18609e-05	1.56816e-05
36.2	0.05301	0.05837	0.02724	0.03006	0.0365	0.03422	0.03173	0.02161		36.2	0.0481	0.0536	0.0376	0.0351	0.032	0.0397	0.0372	0.0199		0.00491	0.00477	-0.01036	-0.00504	0.0045	-0.00548	-0.00547	0.00171		2.41081e-05	2.27529e-05	0.00010733	2.54016e-05	2.025e-05	3.00304e-05	2.99209e-05	2.9241e-06
36.4	0.05176	0.05667	0.02779	0.03121	0.03755	0.03602	0.03103	0.02226		36.4	0.0475	0.0533	0.0376	0.0349	0.0316	0.0397	0.0371	0.0222		0.00426	0.00337	-0.00981	-0.00369	0.00595	-0.00368	-0.00607	6e-05		1.81476e-05	1.13569e-05	9.62361e-05	1.36161e-05	3.54025e-05	1.35424e-05	3.68449e-05	3.6e-09
36.6	0.05281	0.05737	0.02914	0.03061	0.03965	0.03572	0.03368	0.02046		36.6	0.047	0.0529	0.0369	0.0347	0.0315	0.0397	0.0369	0.0228		0.00581	0.00447	-0.00776	-0.00409	0.00815	-0.00398	-0.00322	-0.00234		3.37561e-05	1.99809e-05	6.02176e-05	1.67281e-05	6.64225e-05	1.58404e-05	1.03684e-05	5.4756e-06
36.8	0.05096	0.05397	0.02829	0.02821	0.0418	0.03792	0.02778	0.02231		36.8	0.0467	0.0523	0.0368	0.0346	0.0313	0.0396	0.0369	0.0207		0.00426	0.00167	-0.00851	-0.00639	0.0105	-0.00168	-0.00912	0.00161		1.81476e-05	2.7889e-06	7.24201e-05	4.08321e-05	0.00011025	2.8224e-06	8.31744e-05	2.5921e-06
37	0.05161	0.05692	0.03119	0.03001	0.04035	0.03852	0.03528	0.02341		37	0.0463	0.052	0.0367	0.0346	0.0311	0.0392	0.0367	0.0187		0.00531	0.00492	-0.00551	-0.00459	0.00925	-0.00068	-0.00142	0.00471		2.81961e-05	2.42064e-05	3.03601e-05	2.10681e-05	8.55625e-05	4.624e-07	2.0164e-06	2.21841e-05
37.2	0.05136	0.05562	0.02674	0.02946	0.03655	0.03967	0.02833	0.02151		37.2	0.0458	0.0518	0.0367	0.0342	0.031	0.039	0.0365	0.0218		0.00556	0.00382	-0.00996	-0.00474	0.00555	0.00067	-0.00817	-0.00029		3.09136e-05	1.45924e-05	9.92016e-05	2.24676e-05	3.08025e-05	4.489e-07	6.67489e-05	8.41e-08
37.4	0.05211	0.05352	0.02724	0.02906	0.03165	0.04022	0.03183	0.02061		37.4	0.0457	0.0515	0.0366	0.034	0.0305	0.0388	0.0362	0.0234		0.00641	0.00202	-0.00936	-0.00494	0.00115	0.00142	-0.00437	-0.00279		4.10881e-05	4.0804e-06	8.76096e-05	2.44036e-05	1.3225e-06	2.0164e-06	1.90969e-05	7.7841e-06
37.6	0.04886	0.05427	0.02629	0.02926	0.0303	0.03622	0.02833	0.02031		37.6	0.0455	0.0516	0.0362	0.034	0.0305	0.0385	0.0359	0.0219		0.00336	0.00267	-0.00991	-0.00474	-0.0002	-0.00228	-0.00757	-0.00159		1.12896e-05	7.1289e-06	9.82081e-05	2.24676e-05	4e-08	5.1984e-06	5.73049e-05	2.5281e-06
37.8	0.04936	0.05792	0.02549	0.02761	0.03255	0.04397	0.03038	0.02161		37.8	0.0453	0.0516	0.0357	0.0336	0.0303	0.0384	0.0357	0.0191		0.00406	0.00632	-0.01021	-0.00599	0.00225	0.00557	-0.00532	0.00251		1.64836e-05	3.99424e-05	0.000104244	3.58801e-05	5.0625e-06	3.10249e-05	2.83024e-05	6.3001e-06
38	0.05146	0.05577	0.02839	0.03071	0.0358	0.03782	0.03033	0.01976		38	0.0453	0.0513	0.0358	0.0334	0.03	0.0381	0.0355	0.0196		0.00616	0.00447	-0.00741	-0.00269	0.0058	-0.00028	-0.00517	0.00016		3.79456e-05	1.99809e-05	5.49081e-05	7.2361e-06	3.364e-05	7.84e-08	2.67289e-05	2.56e-08
38.2	0.05051	0.05482	0.02594	0.02916	0.0417	0.03412	0.02743	0.02036		38.2	0.0455	0.0515	0.036	0.0332	0.0299	0.038	0.0353	0.0214		0.00501	0.00332	-0.01006	-0.00404	0.0118	-0.00388	-0.00787	-0.00104		2.51001e-05	1.10224e-05	0.000101204	1.63216e-05	0.00013924	1.50544e-05	6.19369e-05	1.0816e-06
38.4	0.04991	0.05397	0.02804	0.03106	0.04155	0.03232	0.03133	0.02236		38.4	0.0448	0.0512	0.0359	0.0333	0.0298	0.0379	0.0353	0.0224		0.00511	0.00277	-0.00786	-0.00224	0.01175	-0.00558	-0.00397	-4e-05		2.61121e-05	7.6729e-06	6.17796e-05	5.0176e-06	0.000138062	3.11364e-05	1.57609e-05	1.6e-09
38.6	0.05086	0.05632	0.02604	0.02721	0.0383	0.03342	0.03173	0.02486		38.6	0.0448	0.0508	0.0359	0.0333	0.0296	0.0379	0.0352	0.0215		0.00606	0.00552	-0.00986	-0.00609	0.0087	-0.00448	-0.00347	0.00336		3.67236e-05	3.04704e-05	9.72196e-05	3.70881e-05	7.569e-05	2.00704e-05	1.20409e-05	1.12896e-05
38.8	0.04966	0.05182	0.02634	0.03246	0.03655	0.03627	0.02848	0.02376		38.8	0.0449	0.0507	0.0356	0.033	0.0296	0.0377	0.035	0.0213		0.00476	0.00112	-0.00926	-0.00054	0.00695	-0.00143	-0.00652	0.00246		2.26576e-05	1.2544e-06	8.57476e-05	2.916e-07	4.83025e-05	2.0449e-06	4.25104e-05	6.0516e-06
39	0.04826	0.05702	0.02679	0.02681	0.0349	0.03582	0.02863	0.02281		39	0.0445	0.0501	0.0354	0.0328	0.0295	0.0376	0.0348	0.0207		0.00376	0.00692	-0.00861	-0.00599	0.0054	-0.00178	-0.00617	0.00211		1.41376e-05	4.78864e-05	7.41321e-05	3.58801e-05	2.916e-05	3.1684e-06	3.80689e-05	4.4521e-06
39.2	0.05046	0.05842	0.02584	0.02666	0.03575	0.03737	0.03263	0.02151		39.2	0.0443	0.0497	0.0353	0.0325	0.0293	0.0375	0.0347	0.02		0.00616	0.00872	-0.00946	-0.00584	0.00645	-0.00013	-0.00207	0.00151		3.79456e-05	7.60384e-05	8.94916e-05	3.41056e-05	4.16025e-05	1.69e-08	4.2849e-06	2.2801e-06
39.4	0.05321	0.05922	0.02664	0.02796	0.0401	0.03537	0.02783	0.02031		39.4	0.044	0.0494	0.035	0.0324	0.0292	0.0376	0.0347	0.0204		0.00921	0.00982	-0.00836	-0.00444	0.0109	-0.00223	-0.00687	-9e-05		8.48241e-05	9.64324e-05	6.98896e-05	1.97136e-05	0.00011881	4.9729e-06	4.71969e-05	8.1e-09
39.6	0.04871	0.06377	0.02514	0.02551	0.03565	0.03582	0.02938	0.02126		39.6	0.0439	0.0491	0.035	0.0326	0.029	0.0375	0.0347	0.0199		0.00481	0.01467	-0.00986	-0.00709	0.00665	-0.00168	-0.00532	0.00136		2.31361e-05	0.000215209	9.72196e-05	5.02681e-05	4.42225e-05	2.8224e-06	2.83024e-05	1.8496e-06
39.8	0.04911	0.05957	0.02679	0.03236	0.037	0.03377	0.02788	0.02091		39.8	0.0437	0.0487	0.0349	0.0324	0.0289	0.037	0.0345	0.02		0.00541	0.01087	-0.00811	-4e-05	0.0081	-0.00323	-0.00662	0.00091		2.92681e-05	0.000118157	6.57721e-05	1.6e-09	6.561e-05	1.04329e-05	4.38244e-05	8.281e-07
40	0.05041	0.05472	0.02634	0.02646	0.0366	0.03282	0.02713	0.01926		40	0.0436	0.0484	0.0347	0.0322	0.0288	0.0367	0.0341	0.0201		0.00681	0.00632	-0.00836	-0.00574	0.0078	-0.00388	-0.00697	-0.00084		4.63761e-05	3.99424e-05	6.98896e-05	3.29476e-05	6.084e-05	1.50544e-05	4.85809e-05	7.056e-07
40.2	0.04881	0.05652	0.02629	0.02731	0.0347	0.04232	0.02643	0.02076		40.2	0.0438	0.0487	0.0344	0.032	0.0286	0.0365	0.0337	0.0198		0.00501	0.00782	-0.00811	-0.00469	0.0061	0.00582	-0.00727	0.00096		2.51001e-05	6.11524e-05	6.57721e-05	2.19961e-05	3.721e-05	3.38724e-05	5.28529e-05	9.216e-07
40.4	0.04841	0.05487	0.02774	0.02831	0.03295	0.03822	0.02903	0.02131		40.4	0.0434	0.0487	0.0343	0.0319	0.0286	0.0365	0.0338	0.0204		0.00501	0.00617	-0.00656	-0.00359	0.00435	0.00172	-0.00477	0.00091		2.51001e-05	3.80689e-05	4.30336e-05	1.28881e-05	1.89225e-05	2.9584e-06	2.27529e-05	8.281e-07
40.6	0.04766	0.05667	0.02789	0.02756	0.0367	0.03607	0.02778	0.02241		40.6	0.0434	0.0486	0.0345	0.0318	0.0285	0.0364	0.034	0.0206		0.00426	0.00807	-0.00661	-0.00424	0.0082	-0.00033	-0.00622	0.00181		1.81476e-05	6.51249e-05	4.36921e-05	1.79776e-05	6.724e-05	1.089e-07	3.86884e-05	3.2761e-06
40.8	0.04721	0.06067	0.02794	0.03046	0.0309	0.03502	0.02973	0.02001		40.8	0.0436	0.0482	0.0346	0.0318	0.0283	0.0363	0.034	0.0191		0.00361	0.01247	-0.00666	-0.00134	0.0026	-0.00128	-0.00427	0.00091		1.30321e-05	0.000155501	4.43556e-05	1.7956e-06	6.76e-06	1.6384e-06	1.82329e-05	8.281e-07
41	0.04751	0.05772	0.02654	0.02591	0.03615	0.03672	0.02633	0.02281		41	0.0433	0.0477	0.0345	0.0319	0.0283	0.0362	0.0337	0.0184		0.00421	0.01002	-0.00796	-0.00599	0.00785	0.00052	-0.00737	0.00441		1.77241e-05	0.0001004	6.33616e-05	3.58801e-05	6.16225e-05	2.704e-07	5.43169e-05	1.94481e-05
41.2	0.04621	0.05632	0.02804	0.03086	0.0345	0.03347	0.02623	0.02276		41.2	0.043	0.0473	0.0342	0.0316	0.0283	0.0362	0.0333	0.0203		0.00321	0.00902	-0.00616	-0.00074	0.0062	-0.00273	-0.00707	0.00246		1.03041e-05	8.13604e-05	3.79456e-05	5.476e-07	3.844e-05	7.4529e-06	4.99849e-05	6.0516e-06
41.4	0.04901	0.05722	0.02584	0.02681	0.03525	0.03517	0.03278	0.02186		41.4	0.0424	0.0468	0.0341	0.0315	0.0283	0.0361	0.0332	0.0223		0.00661	0.01042	-0.00826	-0.00469	0.00695	-0.00093	-0.00042	-0.00044		4.36921e-05	0.000108576	6.82276e-05	2.19961e-05	4.83025e-05	8.649e-07	1.764e-07	1.936e-07
41.6	0.04616	0.05732	0.03019	0.02941	0.037	0.03737	0.02398	0.01911		41.6	0.042	0.0462	0.0341	0.0314	0.0283	0.0361	0.0333	0.0212		0.00416	0.01112	-0.00391	-0.00199	0.0087	0.00127	-0.00932	-0.00209		1.73056e-05	0.000123654	1.52881e-05	3.9601e-06	7.569e-05	1.6129e-06	8.68624e-05	4.3681e-06
41.8	0.04751	0.05757	0.02759	0.02486	0.0409	0.03592	0.03008	0.02216		41.8	0.0414	0.0458	0.0338	0.0313	0.0283	0.0359	0.0335	0.0192		0.00611	0.01177	-0.00621	-0.00644	0.0126	2e-05	-0.00342	0.00296		3.73321e-05	0.000138533	3.85641e-05	4.14736e-05	0.00015876	4e-10	1.16964e-05	8.7616e-06
42	0.04651	0.05722	0.02664	0.02466	0.0368	0.03602	0.02663	0.02251		42	0.0411	0.0458	0.0337	0.0312	0.028	0.0356	0.0333	0.0174		0.00541	0.01142	-0.00706	-0.00654	0.0088	0.00042	-0.00667	0.00511		2.92681e-05	0.000130416	4.98436e-05	4.27716e-05	7.744e-05	1.764e-07	4.44889e-05	2.61121e-05
42.2	0.04701	0.05592	0.02599	0.02581	0.0363	0.03312	0.03088	0.02486		42.2	0.0407	0.0457	0.0333	0.031	0.0278	0.0352	0.0329	0.019		0.00631	0.01022	-0.00731	-0.00519	0.0085	-0.00208	-0.00202	0.00586		3.98161e-05	0.000104448	5.34361e-05	2.69361e-05	7.225e-05	4.3264e-06	4.0804e-06	3.43396e-05
42.4	0.04481	0.05592	0.02489	0.02851	0.03995	0.03222	0.02598	0.02061		42.4	0.0407	0.0457	0.0333	0.0307	0.0276	0.0349	0.0325	0.0212		0.00411	0.01022	-0.00841	-0.00219	0.01235	-0.00268	-0.00652	-0.00059		1.68921e-05	0.000104448	7.07281e-05	4.7961e-06	0.000152522	7.1824e-06	4.25104e-05	3.481e-07
42.6	0.04421	0.05387	0.02749	0.02531	0.0327	0.03582	0.02778	0.02011		42.6	0.0407	0.0458	0.0333	0.0304	0.0273	0.0348	0.0323	0.0214		0.00351	0.00807	-0.00581	-0.00509	0.0054	0.00102	-0.00452	-0.00129		1.23201e-05	6.51249e-05	3.37561e-05	2.59081e-05	2.916e-05	1.0404e-06	2.04304e-05	1.6641e-06
42.8	0.04621	0.05542	0.02629	0.02531	0.03665	0.03572	0.02648	0.01981		42.8	0.0408	0.0456	0.0332	0.0303	0.0271	0.0348	0.0323	0.02		0.00541	0.00982	-0.00691	-0.00499	0.00955	0.00092	-0.00582	-0.00019		2.92681e-05	9.64324e-05	4.77481e-05	2.49001e-05	9.12025e-05	8.464e-07	3.38724e-05	3.61e-08
43	0.04456	0.05572	0.02804	0.02791	0.0339	0.03392	0.02718	0.01891		43	0.0409	0.0454	0.0332	0.0303	0.027	0.0347	0.0323	0.0182		0.00366	0.01032	-0.00516	-0.00239	0.0069	-0.00078	-0.00512	0.00071		1.33956e-05	0.000106502	2.66256e-05	5.7121e-06	4.761e-05	6.084e-07	2.62144e-05	5.041e-07
43.2	0.04536	0.05662	0.02909	0.02731	0.034	0.03707	0.02763	0.02031		43.2	0.0405	0.0448	0.0329	0.0305	0.0269	0.0345	0.0322	0.0187		0.00486	0.01182	-0.00381	-0.00319	0.0071	0.00257	-0.00457	0.00161		2.36196e-05	0.000139712	1.45161e-05	1.01761e-05	5.041e-05	6.6049e-06	2.08849e-05	2.5921e-06
43.4	0.04536	0.05717	0.02584	0.02271	0.03775	0.03212	0.02333	0.01926		43.4	0.0403	0.0441	0.0329	0.0304	0.0269	0.0345	0.0319	0.0189		0.00506	0.01307	-0.00706	-0.00769	0.01085	-0.00238	-0.00857	0.00036		2.56036e-05	0.000170825	4.98436e-05	5.91361e-05	0.000117722	5.6644e-06	7.34449e-05	1.296e-07
43.6	0.04526	0.05107	0.02519	0.02486	0.03545	0.03772	0.02873	0.02021		43.6	0.0397	0.0433	0.0328	0.0303	0.0269	0.0346	0.0317	0.0185		0.00556	0.00777	-0.00761	-0.00544	0.00855	0.00312	-0.00297	0.00171		3.09136e-05	6.03729e-05	5.79121e-05	2.95936e-05	7.31025e-05	9.7344e-06	8.8209e-06	2.9241e-06
43.8	0.04491	0.05017	0.02444	0.02501	0.03235	0.03412	0.02478	0.02171		43.8	0.039	0.0427	0.0328	0.03	0.0268	0.0344	0.0317	0.0166		0.00591	0.00747	-0.00836	-0.00499	0.00555	-0.00028	-0.00692	0.00511		3.49281e-05	5.58009e-05	6.98896e-05	2.49001e-05	3.08025e-05	7.84e-08	4.78864e-05	2.61121e-05
44	0.04366	0.05042	0.02784	0.02721	0.03295	0.03297	0.02868	0.02026		44	0.0384	0.0421	0.0325	0.0297	0.0266	0.0342	0.0317	0.018		0.00526	0.00832	-0.00466	-0.00249	0.00635	-0.00123	-0.00302	0.00226		2.76676e-05	6.92224e-05	2.17156e-05	6.2001e-06	4.03225e-05	1.5129e-06	9.1204e-06	5.1076e-06
44.2	0.04346	0.05117	0.02584	0.02486	0.02755	0.03732	0.02468	0.01836		44.2	0.0377	0.0417	0.032	0.0295	0.0265	0.0339	0.0316	0.0198		0.00576	0.00947	-0.00616	-0.00464	0.00105	0.00342	-0.00692	-0.00144		3.31776e-05	8.96809e-05	3.79456e-05	2.15296e-05	1.1025e-06	1.16964e-05	4.78864e-05	2.0736e-06
44.4	0.04191	0.04917	0.02734	0.02271	0.03405	0.03962	0.02978	0.02006		44.4	0.0374	0.0415	0.0317	0.0291	0.0263	0.0336	0.0313	0.0204		0.00451	0.00767	-0.00436	-0.00639	0.00775	0.00602	-0.00152	-0.00034		2.03401e-05	5.88289e-05	1.90096e-05	4.08321e-05	6.00625e-05	3.62404e-05	2.3104e-06	1.156e-07
44.6	0.04236	0.05162	0.02814	0.02316	0.0322	0.03412	0.02638	0.01831		44.6	0.0371	0.0415	0.0313	0.0288	0.026	0.0331	0.0311	0.0188		0.00526	0.01012	-0.00316	-0.00564	0.0062	0.00102	-0.00472	-0.00049		2.76676e-05	0.000102414	9.9856e-06	3.18096e-05	3.844e-05	1.0404e-06	2.22784e-05	2.401e-07
44.8	0.04181	0.05282	0.02499	0.02526	0.02795	0.03042	0.02383	0.02191		44.8	0.0372	0.0414	0.0314	0.0286	0.0257	0.0328	0.0309	0.0164		0.00461	0.01142	-0.00641	-0.00334	0.00225	-0.00238	-0.00707	0.00551		2.12521e-05	0.000130416	4.10881e-05	1.11556e-05	5.0625e-06	5.6644e-06	4.99849e-05	3.03601e-05
45	0.04161	0.05257	0.02919	0.02811	0.02945	0.02867	0.02663	0.02076		45	0.0374	0.0411	0.0313	0.0284	0.0253	0.0326	0.0306	0.018		0.00421	0.01147	-0.00211	-0.00029	0.00415	-0.00393	-0.00397	0.00276		1.77241e-05	0.000131561	4.4521e-06	8.41e-08	1.72225e-05	1.54449e-05	1.57609e-05	7.6176e-06
45.2	0.04136	0.05282	0.02564	0.02381	0.0282	0.03562	0.02343	0.01986		45.2	0.0373	0.0408	0.0312	0.0284	0.025	0.0324	0.0303	0.0186		0.00406	0.01202	-0.00556	-0.00459	0.0032	0.00322	-0.00687	0.00126		1.64836e-05	0.00014448	3.09136e-05	2.10681e-05	1.024e-05	1.03684e-05	4.71969e-05	1.5876e-06
45.4	0.04201	0.04907	0.02679	0.02286	0.03055	0.04152	0.02708	0.01881		45.4	0.0371	0.0406	0.0312	0.0284	0.0249	0.0323	0.0299	0.0182		0.00491	0.00847	-0.00441	-0.00554	0.00565	0.00922	-0.00282	0.00061		2.41081e-05	7.17409e-05	1.94481e-05	3.06916e-05	3.19225e-05	8.50084e-05	7.9524e-06	3.721e-07
45.6	0.04096	0.04657	0.02409	0.02346	0.0317	0.03157	0.02508	0.01861		45.6	0.0368	0.0403	0.0311	0.0283	0.0248	0.0323	0.0297	0.0178		0.00416	0.00627	-0.00701	-0.00484	0.0069	-0.00073	-0.00462	0.00081		1.73056e-05	3.93129e-05	4.91401e-05	2.34256e-05	4.761e-05	5.329e-07	2.13444e-05	6.561e-07
45.8	0.04031	0.04622	0.02449	0.02336	0.0264	0.03337	0.02783	0.02041		45.8	0.0365	0.0403	0.0311	0.0281	0.0248	0.0322	0.0297	0.0177		0.00381	0.00592	-0.00661	-0.00474	0.0016	0.00117	-0.00187	0.00271		1.45161e-05	3.50464e-05	4.36921e-05	2.24676e-05	2.56e-06	1.3689e-06	3.4969e-06	7.3441e-06
46	0.04161	0.04652	0.02734	0.02401	0.0329	0.03302	0.02508	0.01961		46	0.0361	0.0402	0.0309	0.0279	0.0248	0.0321	0.0297	0.0177		0.00551	0.00632	-0.00356	-0.00389	0.0081	0.00092	-0.00462	0.00191		3.03601e-05	3.99424e-05	1.26736e-05	1.51321e-05	6.561e-05	8.464e-07	2.13444e-05	3.6481e-06
46.2	0.03976	0.04447	0.02319	0.02661	0.02725	0.03247	0.02528	0.02046		46.2	0.0357	0.0399	0.0308	0.0278	0.0246	0.032	0.0297	0.0186		0.00406	0.00457	-0.00761	-0.00119	0.00265	0.00047	-0.00442	0.00186		1.64836e-05	2.08849e-05	5.79121e-05	1.4161e-06	7.0225e-06	2.209e-07	1.95364e-05	3.4596e-06
46.4	0.04046	0.04407	0.02594	0.02486	0.02425	0.03172	0.02133	0.01751		46.4	0.0354	0.0401	0.0307	0.0276	0.0245	0.0319	0.0295	0.0191		0.00506	0.00397	-0.00476	-0.00274	-0.00025	-0.00018	-0.00817	-0.00159		2.56036e-05	1.57609e-05	2.26576e-05	7.5076e-06	6.25e-08	3.24e-08	6.67489e-05	2.5281e-06
46.6	0.04031	0.04572	0.02469	0.02251	0.02345	0.02942	0.02243	0.01851		46.6	0.0351	0.04	0.0305	0.0273	0.0243	0.0316	0.0292	0.0197		0.00521	0.00572	-0.00581	-0.00479	-0.00085	-0.00218	-0.00677	-0.00119		2.71441e-05	3.27184e-05	3.37561e-05	2.29441e-05	7.225e-07	4.7524e-06	4.58329e-05	1.4161e-06
46.8	0.03886	0.04892	0.02339	0.02041	0.02365	0.03222	0.02438	0.01886		46.8	0.0352	0.0398	0.0306	0.027	0.0242	0.0314	0.0289	0.0195		0.00366	0.00912	-0.00721	-0.00659	-0.00055	0.00082	-0.00452	-0.00064		1.33956e-05	8.31744e-05	5.19841e-05	4.34281e-05	3.025e-07	6.724e-07	2.04304e-05	4.096e-07
47	0.04021	0.05087	0.02499	0.02331	0.02395	0.03592	0.02588	0.01876		47	0.0353	0.0397	0.0304	0.0267	0.024	0.0313	0.0288	0.018		0.00491	0.01117	-0.00541	-0.00339	-5e-05	0.00462	-0.00292	0.00076		2.41081e-05	0.000124769	2.92681e-05	1.14921e-05	2.5e-09	2.13444e-05	8.5264e-06	5.776e-07
47.2	0.03741	0.04967	0.02414	0.02286	0.0246	0.03402	0.02273	0.01721		47.2	0.0354	0.0394	0.0301	0.0267	0.0238	0.0312	0.0287	0.017		0.00201	0.01027	-0.00596	-0.00384	0.0008	0.00282	-0.00597	0.00021		4.0401e-06	0.000105473	3.55216e-05	1.47456e-05	6.4e-07	7.9524e-06	3.56409e-05	4.41e-08
47.4	0.03836	0.05062	0.02554	0.02086	0.0278	0.03767	0.02628	0.01881		47.4	0.0356	0.039	0.03	0.0269	0.0236	0.0311	0.0287	0.0144		0.00276	0.01162	-0.00446	-0.00604	0.0042	0.00657	-0.00242	0.00441		7.6176e-06	0.000135024	1.98916e-05	3.64816e-05	1.764e-05	4.31649e-05	5.8564e-06	1.94481e-05
47.6	0.03766	0.04887	0.02409	0.02411	0.02765	0.03007	0.02233	0.02046		47.6	0.0356	0.0388	0.0297	0.027	0.0235	0.031	0.0287	0.0166		0.00206	0.01007	-0.00561	-0.00289	0.00415	-0.00093	-0.00637	0.00386		4.2436e-06	0.000101405	3.14721e-05	8.3521e-06	1.72225e-05	8.649e-07	4.05769e-05	1.48996e-05
47.8	0.03826	0.04922	0.02369	0.02421	0.0294	0.02872	0.02458	0.01966		47.8	0.0353	0.0384	0.0295	0.0269	0.0234	0.0308	0.0284	0.0179		0.00296	0.01082	-0.00581	-0.00269	0.006	-0.00208	-0.00382	0.00176		8.7616e-06	0.000117072	3.37561e-05	7.2361e-06	3.6e-05	4.3264e-06	1.45924e-05	3.0976e-06
48	0.03711	0.04702	0.02474	0.02286	0.02785	0.02937	0.02208	0.02026		48	0.0353	0.0384	0.0296	0.0267	0.0233	0.0307	0.0281	0.0194		0.00181	0.00862	-0.00486	-0.00384	0.00455	-0.00133	-0.00602	0.00086		3.2761e-06	7.43044e-05	2.36196e-05	1.47456e-05	2.07025e-05	1.7689e-06	3.62404e-05	7.396e-07
48.2	0.03721	0.04657	0.02329	0.02546	0.027	0.03257	0.02243	0.01916		48.2	0.035	0.0383	0.0295	0.0265	0.0233	0.0306	0.028	0.0189		0.00221	0.00827	-0.00621	-0.00104	0.0037	0.00197	-0.00557	0.00026		4.8841e-06	6.83929e-05	3.85641e-05	1.0816e-06	1.369e-05	3.8809e-06	3.10249e-05	6.76e-08
48.4	0.03751	0.04737	0.02439	0.02136	0.02365	0.03802	0.02418	0.01816		48.4	0.0347	0.0383	0.0296	0.0264	0.0234	0.0305	0.028	0.0186		0.00281	0.00907	-0.00521	-0.00504	0.00025	0.00752	-0.00382	-0.00044		7.8961e-06	8.22649e-05	2.71441e-05	2.54016e-05	6.25e-08	5.65504e-05	1.45924e-05	1.936e-07
48.6	0.03706	0.04752	0.02354	0.02216	0.02495	0.03542	0.02368	0.01846		48.6	0.0346	0.0381	0.0295	0.0264	0.0233	0.0304	0.028	0.0185		0.00246	0.00942	-0.00596	-0.00424	0.00165	0.00502	-0.00432	-4e-05		6.0516e-06	8.87364e-05	3.55216e-05	1.79776e-05	2.7225e-06	2.52004e-05	1.86624e-05	1.6e-09
48.8	0.03841	0.04902	0.02329	0.02116	0.02645	0.03912	0.02313	0.01886		48.8	0.0346	0.038	0.0293	0.0263	0.0233	0.0302	0.028	0.0168		0.00381	0.01102	-0.00601	-0.00514	0.00315	0.00892	-0.00487	0.00206		1.45161e-05	0.00012144	3.61201e-05	2.64196e-05	9.9225e-06	7.95664e-05	2.37169e-05	4.2436e-06
49	0.03731	0.04612	0.02369	0.02061	0.02715	0.03087	0.02403	0.01941		49	0.0345	0.0379	0.0292	0.0262	0.0233	0.0301	0.0279	0.0143		0.00281	0.00822	-0.00551	-0.00559	0.00385	0.00077	-0.00387	0.00511		7.8961e-06	6.75684e-05	3.03601e-05	3.12481e-05	1.48225e-05	5.929e-07	1.49769e-05	2.61121e-05
49.2	0.03846	0.04617	0.02259	0.02056	0.0237	0.02712	0.02313	0.01986		49.2	0.0346	0.0377	0.029	0.0259	0.0231	0.03	0.0277	0.0156		0.00386	0.00847	-0.00641	-0.00534	0.0006	-0.00288	-0.00457	0.00426		1.48996e-05	7.17409e-05	4.10881e-05	2.85156e-05	3.6e-07	8.2944e-06	2.08849e-05	1.81476e-05
49.4	0.03706	0.04487	0.02399	0.02216	0.02135	0.02922	0.02418	0.01976		49.4	0.0345	0.0376	0.0292	0.0259	0.023	0.03	0.0276	0.017		0.00256	0.00727	-0.00521	-0.00374	-0.00165	-0.00078	-0.00342	0.00276		6.5536e-06	5.28529e-05	2.71441e-05	1.39876e-05	2.7225e-06	6.084e-07	1.16964e-05	7.6176e-06
49.6	0.03711	0.04442	0.02314	0.02036	0.0226	0.02827	0.02128	0.01631		49.6	0.0344	0.0375	0.0292	0.0259	0.0229	0.03	0.0275	0.0176		0.00271	0.00692	-0.00606	-0.00554	-0.0003	-0.00173	-0.00622	-0.00129		7.3441e-06	4.78864e-05	3.67236e-05	3.06916e-05	9e-08	2.9929e-06	3.86884e-05	1.6641e-06
49.8	0.03671	0.04532	0.02229	0.02226	0.02245	0.03147	0.02123	0.01711		49.8	0.0342	0.0373	0.0293	0.026	0.0229	0.03	0.0275	0.0177		0.00251	0.00802	-0.00701	-0.00374	-0.00045	0.00147	-0.00627	-0.00059		6.3001e-06	6.43204e-05	4.91401e-05	1.39876e-05	2.025e-07	2.1609e-06	3.93129e-05	3.481e-07
50	0.03686	0.04547	0.02319	0.02141	0.02015	0.02962	0.02373	0.01796		50	0.0341	0.0372	0.0292	0.0259	0.0228	0.0298	0.0274	0.0165		0.00276	0.00827	-0.00601	-0.00449	-0.00265	-0.00018	-0.00367	0.00146		7.6176e-06	6.83929e-05	3.61201e-05	2.01601e-05	7.0225e-06	3.24e-08	1.34689e-05	2.1316e-06
50.2	0.03636	0.04502	0.02194	0.02051	0.0208	0.03052	0.02278	0.01791		50.2	0.0338	0.0372	0.0289	0.0258	0.0227	0.0296	0.0273	0.0161		0.00256	0.00782	-0.00696	-0.00529	-0.0019	0.00092	-0.00452	0.00181		6.5536e-06	6.11524e-05	4.84416e-05	2.79841e-05	3.61e-06	8.464e-07	2.04304e-05	3.2761e-06
50.4	0.03666	0.04512	0.02359	0.02121	0.02165	0.03057	0.02173	0.01796		50.4	0.0336	0.0374	0.0288	0.0255	0.0227	0.0294	0.0271	0.0172		0.00306	0.00772	-0.00521	-0.00429	-0.00105	0.00117	-0.00537	0.00076		9.3636e-06	5.95984e-05	2.71441e-05	1.84041e-05	1.1025e-06	1.3689e-06	2.88369e-05	5.776e-07
50.6	0.03656	0.04597	0.02259	0.02006	0.021	0.02977	0.02353	0.01736		50.6	0.0334	0.0378	0.0287	0.0254	0.0226	0.0294	0.0269	0.0177		0.00316	0.00817	-0.00611	-0.00534	-0.0016	0.00037	-0.00337	-0.00034		9.9856e-06	6.67489e-05	3.73321e-05	2.85156e-05	2.56e-06	1.369e-07	1.13569e-05	1.156e-07
50.8	0.03591	0.04742	0.02209	0.02186	0.0216	0.03182	0.02178	0.01991		50.8	0.0335	0.0382	0.0286	0.0254	0.0225	0.0293	0.0269	0.0186		0.00241	0.00922	-0.00651	-0.00354	-0.0009	0.00252	-0.00512	0.00131		5.8081e-06	8.50084e-05	4.23801e-05	1.25316e-05	8.1e-07	6.3504e-06	2.62144e-05	1.7161e-06
51	0.03661	0.04502	0.02324	0.02086	0.02245	0.03152	0.01913	0.01971		51	0.0337	0.0381	0.0287	0.0253	0.0225	0.0293	0.0269	0.0181		0.00291	0.00692	-0.00546	-0.00444	-5e-05	0.00222	-0.00777	0.00161		8.4681e-06	4.78864e-05	2.98116e-05	1.97136e-05	2.5e-09	4.9284e-06	6.03729e-05	2.5921e-06
51.2	0.03691	0.04547	0.02159	0.01971	0.02135	0.02647	0.02303	0.02031		51.2	0.034	0.0382	0.0288	0.0253	0.0223	0.0292	0.0269	0.0179		0.00291	0.00727	-0.00721	-0.00559	-0.00095	-0.00273	-0.00387	0.00241		8.4681e-06	5.28529e-05	5.19841e-05	3.12481e-05	9.025e-07	7.4529e-06	1.49769e-05	5.8081e-06
51.4	0.03546	0.04557	0.02244	0.02181	0.02205	0.02972	0.02193	0.02046		51.4	0.0339	0.0381	0.0287	0.0253	0.0222	0.0292	0.0268	0.018		0.00156	0.00747	-0.00626	-0.00349	-0.00015	0.00052	-0.00487	0.00246		2.4336e-06	5.58009e-05	3.91876e-05	1.21801e-05	2.25e-08	2.704e-07	2.37169e-05	6.0516e-06
51.6	0.03576	0.04642	0.02404	0.02146	0.02235	0.02922	0.02388	0.01896		51.6	0.0341	0.0379	0.0287	0.0252	0.0222	0.0293	0.0267	0.0178		0.00166	0.00852	-0.00466	-0.00374	0.00015	-8e-05	-0.00282	0.00116		2.7556e-06	7.25904e-05	2.17156e-05	1.39876e-05	2.25e-08	6.4e-09	7.9524e-06	1.3456e-06
51.8	0.03586	0.04797	0.02289	0.02006	0.02185	0.02937	0.02093	0.01836		51.8	0.0342	0.0379	0.0288	0.0254	0.0222	0.0294	0.0266	0.0168		0.00166	0.01007	-0.00591	-0.00534	-0.00035	-3e-05	-0.00567	0.00156		2.7556e-06	0.000101405	3.49281e-05	2.85156e-05	1.225e-07	9e-10	3.21489e-05	2.4336e-06
52	0.03501	0.04752	0.02319	0.02046	0.0208	0.02997	0.02158	0.01981		52	0.034	0.0377	0.0287	0.0254	0.0223	0.0294	0.0267	0.0162		0.00101	0.00982	-0.00551	-0.00494	-0.0015	0.00057	-0.00512	0.00361		1.0201e-06	9.64324e-05	3.03601e-05	2.44036e-05	2.25e-06	3.249e-07	2.62144e-05	1.30321e-05
52.2	0.03546	0.04912	0.02194	0.02091	0.02045	0.03017	0.02178	0.01926		52.2	0.034	0.0377	0.0287	0.0254	0.0223	0.0295	0.0267	0.0158		0.00146	0.01142	-0.00676	-0.00449	-0.00185	0.00067	-0.00492	0.00346		2.1316e-06	0.000130416	4.56976e-05	2.01601e-05	3.4225e-06	4.489e-07	2.42064e-05	1.19716e-05
52.4	0.03521	0.04737	0.02169	0.01841	0.0239	0.02692	0.02103	0.01861		52.4	0.034	0.0381	0.0286	0.0252	0.0222	0.0294	0.0267	0.0158		0.00121	0.00927	-0.00691	-0.00679	0.0017	-0.00248	-0.00567	0.00281		1.4641e-06	8.59329e-05	4.77481e-05	4.61041e-05	2.89e-06	6.1504e-06	3.21489e-05	7.8961e-06
52.6	0.03626	0.04582	0.02124	0.02091	0.02195	0.02807	0.02208	0.01851		52.6	0.0339	0.0384	0.0283	0.0252	0.0223	0.0292	0.0267	0.0164		0.00236	0.00742	-0.00706	-0.00429	-0.00035	-0.00113	-0.00462	0.00211		5.5696e-06	5.50564e-05	4.98436e-05	1.84041e-05	1.225e-07	1.2769e-06	2.13444e-05	4.4521e-06
52.8	0.03581	0.04652	0.02089	0.01956	0.0249	0.02677	0.01973	0.01776		52.8	0.034	0.0387	0.0285	0.0252	0.0223	0.0292	0.0266	0.0177		0.00181	0.00782	-0.00761	-0.00564	0.0026	-0.00243	-0.00687	6e-05		3.2761e-06	6.11524e-05	5.79121e-05	3.18096e-05	6.76e-06	5.9049e-06	4.71969e-05	3.6e-09
53	0.03491	0.04637	0.02209	0.02011	0.02285	0.02792	0.02118	0.01771		53	0.0342	0.0389	0.0285	0.0251	0.0222	0.0291	0.0266	0.018		0.00071	0.00747	-0.00641	-0.00499	0.00065	-0.00118	-0.00542	-0.00029		5.041e-07	5.58009e-05	4.10881e-05	2.49001e-05	4.225e-07	1.3924e-06	2.93764e-05	8.41e-08
53.2	0.03616	0.04622	0.02224	0.02271	0.02095	0.02667	0.02258	0.01946		53.2	0.0345	0.0393	0.0285	0.0252	0.0223	0.0291	0.0266	0.0179		0.00166	0.00692	-0.00626	-0.00249	-0.00135	-0.00243	-0.00402	0.00156		2.7556e-06	4.78864e-05	3.91876e-05	6.2001e-06	1.8225e-06	5.9049e-06	1.61604e-05	2.4336e-06
53.4	0.03596	0.04532	0.02189	0.01976	0.0215	0.03032	0.02058	0.01801		53.4	0.0348	0.0394	0.0287	0.0252	0.0223	0.0292	0.0265	0.0176		0.00116	0.00592	-0.00681	-0.00544	-0.0008	0.00112	-0.00592	0.00041		1.3456e-06	3.50464e-05	4.63761e-05	2.95936e-05	6.4e-07	1.2544e-06	3.50464e-05	1.681e-07
53.6	0.03526	0.04432	0.02264	0.02166	0.0201	0.02722	0.02048	0.01836		53.6	0.035	0.0397	0.0287	0.0253	0.0222	0.0293	0.0265	0.0173		0.00026	0.00462	-0.00606	-0.00364	-0.0021	-0.00208	-0.00602	0.00106		6.76e-08	2.13444e-05	3.67236e-05	1.32496e-05	4.41e-06	4.3264e-06	3.62404e-05	1.1236e-06
53.8	0.03596	0.04552	0.02119	0.01961	0.02185	0.02632	0.01963	0.01791		53.8	0.0351	0.0396	0.0287	0.0254	0.0223	0.0295	0.0266	0.0172		0.00086	0.00592	-0.00751	-0.00579	-0.00045	-0.00318	-0.00697	0.00071		7.396e-07	3.50464e-05	5.64001e-05	3.35241e-05	2.025e-07	1.01124e-05	4.85809e-05	5.041e-07
54	0.03601	0.05037	0.02269	0.02031	0.02175	0.03027	0.02013	0.01831		54	0.0354	0.0398	0.0289	0.0255	0.0224	0.0296	0.0266	0.0161		0.00061	0.01057	-0.00621	-0.00519	-0.00065	0.00067	-0.00647	0.00221		3.721e-07	0.000111725	3.85641e-05	2.69361e-05	4.225e-07	4.489e-07	4.18609e-05	4.8841e-06
54.2	0.03571	0.05132	0.02109	0.01976	0.02105	0.02817	0.02393	0.01761		54.2	0.0354	0.0397	0.0289	0.0256	0.0224	0.0297	0.0268	0.016		0.00031	0.01162	-0.00781	-0.00584	-0.00135	-0.00153	-0.00287	0.00161		9.61e-08	0.000135024	6.09961e-05	3.41056e-05	1.8225e-06	2.3409e-06	8.2369e-06	2.5921e-06
54.4	0.03571	0.04842	0.02294	0.01841	0.02065	0.02882	0.02193	0.01706		54.4	0.0353	0.0398	0.0289	0.0256	0.0225	0.0298	0.0269	0.0163		0.00041	0.00862	-0.00596	-0.00719	-0.00185	-0.00098	-0.00497	0.00076		1.681e-07	7.43044e-05	3.55216e-05	5.16961e-05	3.4225e-06	9.604e-07	2.47009e-05	5.776e-07
54.6	0.03586	0.04687	0.02224	0.02096	0.02415	0.02652	0.02043	0.01916		54.6	0.0352	0.0394	0.0288	0.0257	0.0226	0.03	0.0268	0.0165		0.00066	0.00747	-0.00656	-0.00474	0.00155	-0.00348	-0.00637	0.00266		4.356e-07	5.58009e-05	4.30336e-05	2.24676e-05	2.4025e-06	1.21104e-05	4.05769e-05	7.0756e-06
54.8	0.03601	0.04767	0.02249	0.01971	0.02225	0.02717	0.01953	0.01826		54.8	0.0352	0.0393	0.0287	0.0257	0.0227	0.0298	0.0269	0.0169		0.00081	0.00837	-0.00621	-0.00599	-0.00045	-0.00263	-0.00737	0.00136		6.561e-07	7.00569e-05	3.85641e-05	3.58801e-05	2.025e-07	6.9169e-06	5.43169e-05	1.8496e-06
55	0.03636	0.04847	0.02299	0.02111	0.02325	0.02857	0.02188	0.01886		55	0.0349	0.039	0.0286	0.0257	0.0229	0.0298	0.0269	0.0173		0.00146	0.00947	-0.00561	-0.00459	0.00035	-0.00123	-0.00502	0.00156		2.1316e-06	8.96809e-05	3.14721e-05	2.10681e-05	1.225e-07	1.5129e-06	2.52004e-05	2.4336e-06
55.2	0.03616	0.04622	0.02219	0.01991	0.02325	0.02592	0.02133	0.01796		55.2	0.0348	0.0394	0.0286	0.0257	0.0228	0.0299	0.027	0.0174		0.00136	0.00682	-0.00641	-0.00579	0.00045	-0.00398	-0.00567	0.00056		1.8496e-06	4.65124e-05	4.10881e-05	3.35241e-05	2.025e-07	1.58404e-05	3.21489e-05	3.136e-07
55.4	0.03626	0.04712	0.02194	0.01901	0.0199	0.02647	0.02123	0.01846		55.4	0.0348	0.0398	0.0286	0.0256	0.0228	0.0299	0.027	0.0171		0.00146	0.00732	-0.00666	-0.00659	-0.0029	-0.00343	-0.00577	0.00136		2.1316e-06	5.35824e-05	4.43556e-05	4.34281e-05	8.41e-06	1.17649e-05	3.32929e-05	1.8496e-06
55.6	0.03731	0.04512	0.02279	0.02096	0.0204	0.02722	0.02013	0.01846		55.6	0.0351	0.0407	0.0288	0.0255	0.0228	0.0297	0.0271	0.0176		0.00221	0.00442	-0.00601	-0.00454	-0.0024	-0.00248	-0.00697	0.00086		4.8841e-06	1.95364e-05	3.61201e-05	2.06116e-05	5.76e-06	6.1504e-06	4.85809e-05	7.396e-07
55.8	0.03621	0.04492	0.02229	0.01806	0.02325	0.02602	0.02173	0.01631		55.8	0.0354	0.0417	0.0289	0.0255	0.0228	0.0296	0.027	0.0177		0.00081	0.00322	-0.00661	-0.00744	0.00045	-0.00358	-0.00527	-0.00139		6.561e-07	1.03684e-05	4.36921e-05	5.53536e-05	2.025e-07	1.28164e-05	2.77729e-05	1.9321e-06
56	0.03706	0.04412	0.02384	0.02036	0.0261	0.02717	0.02098	0.01781		56	0.036	0.0422	0.0292	0.0255	0.0226	0.0296	0.0269	0.0183		0.00106	0.00192	-0.00536	-0.00514	0.0035	-0.00243	-0.00592	-0.00049		1.1236e-06	3.6864e-06	2.87296e-05	2.64196e-05	1.225e-05	5.9049e-06	3.50464e-05	2.401e-07
56.2	0.03696	0.04302	0.02194	0.01836	0.02205	0.02522	0.02338	0.01986		56.2	0.0368	0.0422	0.0293	0.0257	0.0226	0.0298	0.0269	0.0188		0.00016	0.00082	-0.00736	-0.00734	-0.00055	-0.00458	-0.00352	0.00106		2.56e-08	6.724e-07	5.41696e-05	5.38756e-05	3.025e-07	2.09764e-05	1.23904e-05	1.1236e-06
56.4	0.03666	0.04482	0.02439	0.02156	0.02175	0.02527	0.01988	0.01786		56.4	0.0371	0.0422	0.0292	0.0261	0.0226	0.03	0.0269	0.0185		-0.00044	0.00262	-0.00481	-0.00454	-0.00085	-0.00473	-0.00702	-0.00064		1.936e-07	6.8644e-06	2.31361e-05	2.06116e-05	7.225e-07	2.23729e-05	4.92804e-05	4.096e-07
56.6	0.03706	0.04662	0.02424	0.01991	0.0202	0.02722	0.02188	0.01861		56.6	0.037	0.0424	0.0292	0.0263	0.0228	0.0306	0.027	0.0184		6e-05	0.00422	-0.00496	-0.00639	-0.0026	-0.00338	-0.00512	0.00021		3.6e-09	1.78084e-05	2.46016e-05	4.08321e-05	6.76e-06	1.14244e-05	2.62144e-05	4.41e-08
56.8	0.03696	0.04597	0.02264	0.02111	0.0217	0.03132	0.01753	0.01761		56.8	0.037	0.0419	0.0295	0.0266	0.0231	0.031	0.0273	0.0182		-4e-05	0.00407	-0.00686	-0.00549	-0.0014	0.00032	-0.00977	-0.00059		1.6e-09	1.65649e-05	4.70596e-05	3.01401e-05	1.96e-06	1.024e-07	9.54529e-05	3.481e-07
57	0.03736	0.04332	0.02399	0.02026	0.0211	0.02837	0.02188	0.01806		57	0.0372	0.0419	0.0298	0.0266	0.0234	0.0311	0.0275	0.0182		0.00016	0.00142	-0.00581	-0.00634	-0.0023	-0.00273	-0.00562	-0.00014		2.56e-08	2.0164e-06	3.37561e-05	4.01956e-05	5.29e-06	7.4529e-06	3.15844e-05	1.96e-08
57.2	0.03741	0.04482	0.02244	0.02196	0.0223	0.02582	0.02248	0.01636		57.2	0.0369	0.0416	0.0296	0.0266	0.0236	0.0311	0.0276	0.0178		0.00051	0.00322	-0.00716	-0.00464	-0.0013	-0.00528	-0.00512	-0.00144		2.601e-07	1.03684e-05	5.12656e-05	2.15296e-05	1.69e-06	2.78784e-05	2.62144e-05	2.0736e-06
57.4	0.03681	0.04497	0.02499	0.01996	0.0249	0.02677	0.02093	0.01976		57.4	0.0365	0.0414	0.0296	0.0265	0.0236	0.0311	0.0277	0.017		0.00031	0.00357	-0.00461	-0.00654	0.0013	-0.00433	-0.00677	0.00276		9.61e-08	1.27449e-05	2.12521e-05	4.27716e-05	1.69e-06	1.87489e-05	4.58329e-05	7.6176e-06
57.6	0.03711	0.04552	0.02289	0.02396	0.02585	0.02747	0.02413	0.01816		57.6	0.0363	0.0413	0.0293	0.0264	0.0237	0.031	0.0278	0.0151		0.00081	0.00422	-0.00641	-0.00244	0.00215	-0.00353	-0.00367	0.00306		6.561e-07	1.78084e-05	4.10881e-05	5.9536e-06	4.6225e-06	1.24609e-05	1.34689e-05	9.3636e-06
57.8	0.03781	0.04447	0.02209	0.02011	0.0266	0.02692	0.02208	0.01896		57.8	0.0359	0.0411	0.0293	0.0264	0.0238	0.0308	0.0278	0.0166		0.00191	0.00337	-0.00721	-0.00629	0.0028	-0.00388	-0.00572	0.00236		3.6481e-06	1.13569e-05	5.19841e-05	3.95641e-05	7.84e-06	1.50544e-05	3.27184e-05	5.5696e-06
58	0.03711	0.04682	0.02254	0.02051	0.0288	0.02742	0.02073	0.01806		58	0.0361	0.0408	0.0293	0.0263	0.0238	0.0308	0.0278	0.0175		0.00101	0.00602	-0.00676	-0.00579	0.005	-0.00338	-0.00707	0.00056		1.0201e-06	3.62404e-05	4.56976e-05	3.35241e-05	2.5e-05	1.14244e-05	4.99849e-05	3.136e-07
58.2	0.03761	0.04937	0.02154	0.02006	0.02295	0.02647	0.02248	0.01916		58.2	0.0365	0.0404	0.0293	0.0264	0.0237	0.0307	0.0279	0.0185		0.00111	0.00897	-0.00776	-0.00634	-0.00075	-0.00423	-0.00542	0.00066		1.2321e-06	8.04609e-05	6.02176e-05	4.01956e-05	5.625e-07	1.78929e-05	2.93764e-05	4.356e-07
58.4	0.03686	0.05132	0.02349	0.02336	0.02485	0.02642	0.02178	0.01986		58.4	0.0367	0.0407	0.029	0.0263	0.0234	0.0307	0.0278	0.0191		0.00016	0.01062	-0.00551	-0.00294	0.00145	-0.00428	-0.00602	0.00076		2.56e-08	0.000112784	3.03601e-05	8.6436e-06	2.1025e-06	1.83184e-05	3.62404e-05	5.776e-07
58.6	0.03676	0.04957	0.02349	0.02086	0.02355	0.02702	0.02353	0.01876		58.6	0.0363	0.0406	0.0289	0.0267	0.0233	0.0307	0.0278	0.0176		0.00046	0.00897	-0.00541	-0.00584	0.00025	-0.00368	-0.00427	0.00116		2.116e-07	8.04609e-05	2.92681e-05	3.41056e-05	6.25e-08	1.35424e-05	1.82329e-05	1.3456e-06
58.8	0.03721	0.04937	0.02144	0.02091	0.02495	0.02792	0.02153	0.01666		58.8	0.0365	0.0406	0.0292	0.0267	0.0233	0.0307	0.0279	0.0172		0.00071	0.00877	-0.00776	-0.00579	0.00165	-0.00278	-0.00637	-0.00054		5.041e-07	7.69129e-05	6.02176e-05	3.35241e-05	2.7225e-06	7.7284e-06	4.05769e-05	2.916e-07
59	0.03686	0.04882	0.02369	0.02296	0.0258	0.03112	0.02198	0.01726		59	0.0363	0.0411	0.0294	0.0265	0.0234	0.0305	0.0278	0.0171		0.00056	0.00772	-0.00571	-0.00354	0.0024	0.00062	-0.00582	0.00016		3.136e-07	5.95984e-05	3.26041e-05	1.25316e-05	5.76e-06	3.844e-07	3.38724e-05	2.56e-08
59.2	0.03836	0.04712	0.02344	0.02206	0.0274	0.02967	0.02228	0.01661		59.2	0.0361	0.0417	0.0298	0.0265	0.0234	0.0305	0.0276	0.0172		0.00226	0.00542	-0.00636	-0.00444	0.004	-0.00083	-0.00532	-0.00059		5.1076e-06	2.93764e-05	4.04496e-05	1.97136e-05	1.6e-05	6.889e-07	2.83024e-05	3.481e-07
59.4	0.03736	0.04587	0.02459	0.01946	0.02775	0.02847	0.02173	0.01706		59.4	0.0363	0.0424	0.0299	0.0264	0.0234	0.0306	0.0274	0.0181		0.00106	0.00347	-0.00531	-0.00694	0.00435	-0.00213	-0.00567	-0.00104		1.1236e-06	1.20409e-05	2.81961e-05	4.81636e-05	1.89225e-05	4.5369e-06	3.21489e-05	1.0816e-06
59.6	0.03796	0.04642	0.02274	0.02311	0.02575	0.02852	0.02268	0.02011		59.6	0.0364	0.0427	0.0295	0.0265	0.0235	0.0307	0.0275	0.0192		0.00156	0.00372	-0.00676	-0.00339	0.00225	-0.00218	-0.00482	0.00091		2.4336e-06	1.38384e-05	4.56976e-05	1.14921e-05	5.0625e-06	4.7524e-06	2.32324e-05	8.281e-07
59.8	0.03706	0.04827	0.02204	0.02016	0.03275	0.02817	0.02248	0.01871		59.8	0.0366	0.0427	0.0295	0.0266	0.0235	0.0309	0.0277	0.0186		0.00046	0.00557	-0.00746	-0.00644	0.00925	-0.00273	-0.00522	0.00011		2.116e-07	3.10249e-05	5.56516e-05	4.14736e-05	8.55625e-05	7.4529e-06	2.72484e-05	1.21e-08
										60	0.0487385	0.0538885	0.0402689	0.0371029	0.0330332	0.0422671	0.039588	0.0242368		-0.0487385	-0.0538885	-0.0402689	-0.0371029	-0.0330332	-0.0422671	-0.039588	-0.0242368		0.00237545	0.00290397	0.00162158	0.00137663	0.0010912	0.00178651	0.00156721	0.000587421

## Sheet: RMSE_Meshsize0.2
t	S3	S4	S5	S6	S7	S8	S9	S10		HEC_1A_2_P3	HEC_1A_2_P4	HEC_1A_2_P5	HEC_1A_2_P6	HEC_1A_2_P7	HEC_1A_2_P8	HEC_1A_2_P9	HEC_1A_2_P10		Error 3	Error 4	Error 5	Error 6	Error 7	Error 8	Error 9	Error 10		Error ^2_3	Error ^2_4	Error ^2_5	Error ^2_6	Error ^2_7	Error ^2_8	Error ^2_9	Error ^2_10		RMSE 3	RMSE 4	RMSE 5	RMSE 6	RMSE 7	RMSE 8	RMSE 9	RMSE 10
0	0.00011	-8e-05	0.00039	6e-05	0	-3e-05	-7e-05	-4e-05		0	0	0	0	0	0	0	0		0.00011	-8e-05	0.00039	6e-05	0	-3e-05	-7e-05	-4e-05		1.21e-08	6.4e-09	1.521e-07	3.6e-09	0	9e-10	4.9e-09	1.6e-09		1.12991	1.25515	1.09316	0.525993	0.657702	0.644415	0.555967	0.370534
0.2	-0.00014	7e-05	-6e-05	0.00011	0	-3e-05	-7e-05	-9e-05		0	0	0	0	0	0	0	0		-0.00014	7e-05	-6e-05	0.00011	0	-3e-05	-7e-05	-9e-05		1.96e-08	4.9e-09	3.6e-09	1.21e-08	0	9e-10	4.9e-09	8.1e-09
0.4	-0.00014	-3e-05	-6e-05	6e-05	-0.00015	0.00012	-2e-05	-9e-05		0	0	0	0	0	0	0	0		-0.00014	-3e-05	-6e-05	6e-05	-0.00015	0.00012	-2e-05	-9e-05		1.96e-08	9e-10	3.6e-09	3.6e-09	2.25e-08	1.44e-08	4e-10	8.1e-09
0.6	6e-05	2e-05	-6e-05	6e-05	5e-05	-8e-05	3e-05	-9e-05		0	0	0	0	0	0	0	0		6e-05	2e-05	-6e-05	6e-05	5e-05	-8e-05	3e-05	-9e-05		3.6e-09	4e-10	3.6e-09	3.6e-09	2.5e-09	6.4e-09	9e-10	8.1e-09
0.8	1e-05	-0.00013	4e-05	6e-05	-5e-05	-3e-05	3e-05	-9e-05		0	0	0	0	0	0	0	0		1e-05	-0.00013	4e-05	6e-05	-5e-05	-3e-05	3e-05	-9e-05		1e-10	1.69e-08	1.6e-09	3.6e-09	2.5e-09	9e-10	9e-10	8.1e-09
1	-0.00014	0.00017	-6e-05	6e-05	-0.00015	0.00012	3e-05	-0.00014		0	0	0	0	0	0	0	0		-0.00014	0.00017	-6e-05	6e-05	-0.00015	0.00012	3e-05	-0.00014		1.96e-08	2.89e-08	3.6e-09	3.6e-09	2.25e-08	1.44e-08	9e-10	1.96e-08
1.2	1e-05	-3e-05	-0.00021	1e-05	0.0001	-3e-05	-2e-05	-0.00014		0	0	0	0	0	0	0	0		1e-05	-3e-05	-0.00021	1e-05	0.0001	-3e-05	-2e-05	-0.00014		1e-10	9e-10	4.41e-08	1e-10	1e-08	9e-10	4e-10	1.96e-08
1.4	1e-05	-3e-05	9e-05	6e-05	0	-3e-05	-2e-05	-0.00014		0	0	0	0	0	0	0	0		1e-05	-3e-05	9e-05	6e-05	0	-3e-05	-2e-05	-0.00014		1e-10	9e-10	8.1e-09	3.6e-09	0	9e-10	4e-10	1.96e-08
1.6	0.00026	-0.00013	4e-05	-4e-05	-5e-05	0.00012	-2e-05	-0.00014		0	0	0	0	0	0	0	0		0.00026	-0.00013	4e-05	-4e-05	-5e-05	0.00012	-2e-05	-0.00014		6.76e-08	1.69e-08	1.6e-09	1.6e-09	2.5e-09	1.44e-08	4e-10	1.96e-08
1.8	1e-05	0.00027	-1e-05	-4e-05	0.0002	-0.00013	3e-05	-0.00014		0	0	0	0	0	0	0	0		1e-05	0.00027	-1e-05	-4e-05	0.0002	-0.00013	3e-05	-0.00014		1e-10	7.29e-08	1e-10	1.6e-09	4e-08	1.69e-08	9e-10	1.96e-08
2	-9e-05	2e-05	-1e-05	1e-05	0	-3e-05	0.00013	-9e-05		0	0	0	0	0	0	0	0		-9e-05	2e-05	-1e-05	1e-05	0	-3e-05	0.00013	-9e-05		8.1e-09	4e-10	1e-10	1e-10	0	9e-10	1.69e-08	8.1e-09
2.2	0.00011	-0.00018	-1e-05	-4e-05	0	0.00012	0.00013	-9e-05		0	0	0	0	0	0	0	0		0.00011	-0.00018	-1e-05	-4e-05	0	0.00012	0.00013	-9e-05		1.21e-08	3.24e-08	1e-10	1.6e-09	0	1.44e-08	1.69e-08	8.1e-09
2.4	1e-05	-0.00013	-1e-05	1e-05	-0.00015	-0.00013	0.00013	1e-05		0	0	0	0	0	0	0	0		1e-05	-0.00013	-1e-05	1e-05	-0.00015	-0.00013	0.00013	1e-05		1e-10	1.69e-08	1e-10	1e-10	2.25e-08	1.69e-08	1.69e-08	1e-10
2.6	-9e-05	0.00032	-0.00016	-4e-05	5e-05	7e-05	0.00023	0.00011		0	0	0	0	0	0	0	0		-9e-05	0.00032	-0.00016	-4e-05	5e-05	7e-05	0.00023	0.00011		8.1e-09	1.024e-07	2.56e-08	1.6e-09	2.5e-09	4.9e-09	5.29e-08	1.21e-08
2.8	0.00011	7e-05	4e-05	-4e-05	0	0.00012	-7e-05	0.00031		0	0	0	0	0	0	0	0		0.00011	7e-05	4e-05	-4e-05	0	0.00012	-7e-05	0.00031		1.21e-08	4.9e-09	1.6e-09	1.6e-09	0	1.44e-08	4.9e-09	9.61e-08
3	1e-05	-8e-05	4e-05	-4e-05	-0.00015	-0.00013	-0.00012	0.00021		0	0	0	0	0	0	0	0		1e-05	-8e-05	4e-05	-4e-05	-0.00015	-0.00013	-0.00012	0.00021		1e-10	6.4e-09	1.6e-09	1.6e-09	2.25e-08	1.69e-08	1.44e-08	4.41e-08
3.2	-0.00014	-0.00013	-0.00016	-9e-05	0.0001	-0.00013	-0.00012	0.00011		0	0	0	0	0	0	0	0		-0.00014	-0.00013	-0.00016	-9e-05	0.0001	-0.00013	-0.00012	0.00011		1.96e-08	1.69e-08	2.56e-08	8.1e-09	1e-08	1.69e-08	1.44e-08	1.21e-08
3.4	6e-05	0.00017	0.00034	-4e-05	0	0.00012	-7e-05	0.00011		0	0	0	0	0	0	0	0		6e-05	0.00017	0.00034	-4e-05	0	0.00012	-7e-05	0.00011		3.6e-09	2.89e-08	1.156e-07	1.6e-09	0	1.44e-08	4.9e-09	1.21e-08
3.6	1e-05	-3e-05	-6e-05	-9e-05	0	-0.00018	-7e-05	0.00016		0	0	0	0	0	0	0	0		1e-05	-3e-05	-6e-05	-9e-05	0	-0.00018	-7e-05	0.00016		1e-10	9e-10	3.6e-09	8.1e-09	0	3.24e-08	4.9e-09	2.56e-08
3.8	-0.00014	2e-05	-1e-05	-4e-05	0.0002	7e-05	-2e-05	0.00011		0	0	0	0	0	0	0	0		-0.00014	2e-05	-1e-05	-4e-05	0.0002	7e-05	-2e-05	0.00011		1.96e-08	4e-10	1e-10	1.6e-09	4e-08	4.9e-09	4e-10	1.21e-08
4	1e-05	-8e-05	-0.00016	-9e-05	0	2e-05	-2e-05	6e-05		0	0	0	0	0	0	0	0		1e-05	-8e-05	-0.00016	-9e-05	0	2e-05	-2e-05	6e-05		1e-10	6.4e-09	2.56e-08	8.1e-09	0	4e-10	4e-10	3.6e-09
4.2	-4e-05	7e-05	-1e-05	-9e-05	-5e-05	-0.00018	-0.00017	6e-05		0	0	0	0	0	0	0	0		-4e-05	7e-05	-1e-05	-9e-05	-5e-05	-0.00018	-0.00017	6e-05		1.6e-09	4.9e-09	1e-10	8.1e-09	2.5e-09	3.24e-08	2.89e-08	3.6e-09
4.4	0.00011	7e-05	-0.00016	-9e-05	5e-05	-8e-05	3e-05	6e-05		0	0	0	0	0	0	0	0		0.00011	7e-05	-0.00016	-9e-05	5e-05	-8e-05	3e-05	6e-05		1.21e-08	4.9e-09	2.56e-08	8.1e-09	2.5e-09	6.4e-09	9e-10	3.6e-09
4.6	-4e-05	-3e-05	-0.00021	-4e-05	5e-05	2e-05	3e-05	1e-05		0	0	0	0	0	0	0	0		-4e-05	-3e-05	-0.00021	-4e-05	5e-05	2e-05	3e-05	1e-05		1.6e-09	9e-10	4.41e-08	1.6e-09	2.5e-09	4e-10	9e-10	1e-10
4.8	-9e-05	-8e-05	4e-05	-4e-05	-5e-05	-0.00023	-2e-05	6e-05		0	0	0	0	0	0	0	0		-9e-05	-8e-05	4e-05	-4e-05	-5e-05	-0.00023	-2e-05	6e-05		8.1e-09	6.4e-09	1.6e-09	1.6e-09	2.5e-09	5.29e-08	4e-10	3.6e-09
5	0.00016	-8e-05	-6e-05	1e-05	-0.0002	-3e-05	3e-05	1e-05		0	0	0	0	0	0	0	0		0.00016	-8e-05	-6e-05	1e-05	-0.0002	-3e-05	3e-05	1e-05		2.56e-08	6.4e-09	3.6e-09	1e-10	4e-08	9e-10	9e-10	1e-10
5.2	-4e-05	7e-05	-0.00011	1e-05	5e-05	-3e-05	8e-05	1e-05		0	0	0	0	0	0	0	0		-4e-05	7e-05	-0.00011	1e-05	5e-05	-3e-05	8e-05	1e-05		1.6e-09	4.9e-09	1.21e-08	1e-10	2.5e-09	9e-10	6.4e-09	1e-10
5.4	-0.00014	2e-05	9e-05	-9e-05	-0.0001	-0.00018	8e-05	1e-05		0	0	0	0	0	0	0	0		-0.00014	2e-05	9e-05	-9e-05	-0.0001	-0.00018	8e-05	1e-05		1.96e-08	4e-10	8.1e-09	8.1e-09	1e-08	3.24e-08	6.4e-09	1e-10
5.6	6e-05	-3e-05	-6e-05	-0.00019	-0.0001	-0.00013	0.00013	-9e-05		0	0	0	0	0	0	0	0		6e-05	-3e-05	-6e-05	-0.00019	-0.0001	-0.00013	0.00013	-9e-05		3.6e-09	9e-10	3.6e-09	3.61e-08	1e-08	1.69e-08	1.69e-08	8.1e-09
5.8	1e-05	-8e-05	-6e-05	1e-05	0.0001	-8e-05	0.00033	-4e-05		0	0	0	0	0	0	0	0		1e-05	-8e-05	-6e-05	1e-05	0.0001	-8e-05	0.00033	-4e-05		1e-10	6.4e-09	3.6e-09	1e-10	1e-08	6.4e-09	1.089e-07	1.6e-09
6	-0.00014	7e-05	-0.00021	-4e-05	-0.0001	-3e-05	3e-05	1e-05		0	0	0	0	0	0	0	0		-0.00014	7e-05	-0.00021	-4e-05	-0.0001	-3e-05	3e-05	1e-05		1.96e-08	4.9e-09	4.41e-08	1.6e-09	1e-08	9e-10	9e-10	1e-10
6.2	6e-05	-3e-05	-1e-05	-4e-05	0	-0.00013	-0.00017	-4e-05		0	0	0	0	0	0	0	0		6e-05	-3e-05	-1e-05	-4e-05	0	-0.00013	-0.00017	-4e-05		3.6e-09	9e-10	1e-10	1.6e-09	0	1.69e-08	2.89e-08	1.6e-09
6.4	1e-05	-3e-05	4e-05	-4e-05	0.0002	2e-05	-0.00012	-4e-05		0	0	0	0	0	0	0	0		1e-05	-3e-05	4e-05	-4e-05	0.0002	2e-05	-0.00012	-4e-05		1e-10	9e-10	1.6e-09	1.6e-09	4e-08	4e-10	1.44e-08	1.6e-09
6.6	-0.00014	-0.00013	-0.00016	-4e-05	0	0.00032	-7e-05	1e-05		0	0	0	0	0	0	0	0		-0.00014	-0.00013	-0.00016	-4e-05	0	0.00032	-7e-05	1e-05		1.96e-08	1.69e-08	2.56e-08	1.6e-09	0	1.024e-07	4.9e-09	1e-10
6.8	1e-05	2e-05	0.00014	-9e-05	0	-0.00013	-7e-05	-4e-05		0	0	0	0	0	0	0	0		1e-05	2e-05	0.00014	-9e-05	0	-0.00013	-7e-05	-4e-05		1e-10	4e-10	1.96e-08	8.1e-09	0	1.69e-08	4.9e-09	1.6e-09
7	-4e-05	2e-05	-6e-05	-9e-05	-0.00015	-0.00018	-2e-05	1e-05		0	0	0	0	0	0	0	0		-4e-05	2e-05	-6e-05	-9e-05	-0.00015	-0.00018	-2e-05	1e-05		1.6e-09	4e-10	3.6e-09	8.1e-09	2.25e-08	3.24e-08	4e-10	1e-10
7.2	6e-05	-0.00013	-6e-05	-4e-05	5e-05	-3e-05	-2e-05	-4e-05		0	0	0	0	0	0	0	0		6e-05	-0.00013	-6e-05	-4e-05	5e-05	-3e-05	-2e-05	-4e-05		3.6e-09	1.69e-08	3.6e-09	1.6e-09	2.5e-09	9e-10	4e-10	1.6e-09
7.4	1e-05	-0.00018	-0.00016	-9e-05	0	-0.00018	8e-05	-0.00014		0	0	0	0	0	0	0	0		1e-05	-0.00018	-0.00016	-9e-05	0	-0.00018	8e-05	-0.00014		1e-10	3.24e-08	2.56e-08	8.1e-09	0	3.24e-08	6.4e-09	1.96e-08
7.6	-9e-05	0.00012	-6e-05	-0.00014	-0.0002	-8e-05	3e-05	-4e-05		0	0	0	0	0	0	0	0		-9e-05	0.00012	-6e-05	-0.00014	-0.0002	-8e-05	3e-05	-4e-05		8.1e-09	1.44e-08	3.6e-09	1.96e-08	4e-08	6.4e-09	9e-10	1.6e-09
7.8	0.00011	2e-05	-0.00026	-4e-05	5e-05	2e-05	3e-05	1e-05		0	0	0	0	0	0	0	0		0.00011	2e-05	-0.00026	-4e-05	5e-05	2e-05	3e-05	1e-05		1.21e-08	4e-10	6.76e-08	1.6e-09	2.5e-09	4e-10	9e-10	1e-10
8	-4e-05	-3e-05	-0.00021	-0.00014	-5e-05	-0.00018	-2e-05	-4e-05		0	0	0	0	0	0	0	0		-4e-05	-3e-05	-0.00021	-0.00014	-5e-05	-0.00018	-2e-05	-4e-05		1.6e-09	9e-10	4.41e-08	1.96e-08	2.5e-09	3.24e-08	4e-10	1.6e-09
8.2	-0.00014	-0.00018	4e-05	-0.00014	-0.0001	-3e-05	-2e-05	-9e-05		0	0	0	0	0	0	0	0		-0.00014	-0.00018	4e-05	-0.00014	-0.0001	-3e-05	-2e-05	-9e-05		1.96e-08	3.24e-08	1.6e-09	1.96e-08	1e-08	9e-10	4e-10	8.1e-09
8.4	6e-05	7e-05	-6e-05	-0.00014	0.0001	2e-05	8e-05	-9e-05		0	0	0	0	0	0	0	0		6e-05	7e-05	-6e-05	-0.00014	0.0001	2e-05	8e-05	-9e-05		3.6e-09	4.9e-09	3.6e-09	1.96e-08	1e-08	4e-10	6.4e-09	8.1e-09
8.6	1e-05	-3e-05	-0.00016	-9e-05	-5e-05	-0.00023	8e-05	-9e-05		0	0	0	0	0	0	0	0		1e-05	-3e-05	-0.00016	-9e-05	-5e-05	-0.00023	8e-05	-9e-05		1e-10	9e-10	2.56e-08	8.1e-09	2.5e-09	5.29e-08	6.4e-09	8.1e-09
8.8	-0.00014	-8e-05	0.00024	-0.00014	-5e-05	2e-05	8e-05	-0.00014		0	0	0	0	0	0	0	0		-0.00014	-8e-05	0.00024	-0.00014	-5e-05	2e-05	8e-05	-0.00014		1.96e-08	6.4e-09	5.76e-08	1.96e-08	2.5e-09	4e-10	6.4e-09	1.96e-08
9	6e-05	-0.00013	-6e-05	-0.00014	0	-3e-05	0.00013	-0.00014		0	0	0	0	0	0	0	0		6e-05	-0.00013	-6e-05	-0.00014	0	-3e-05	0.00013	-0.00014		3.6e-09	1.69e-08	3.6e-09	1.96e-08	0	9e-10	1.69e-08	1.96e-08
9.2	1e-05	0.00012	-6e-05	-0.00019	0	-0.00023	8e-05	-0.00014		0	0	0	0	0	0	0	0		1e-05	0.00012	-6e-05	-0.00019	0	-0.00023	8e-05	-0.00014		1e-10	1.44e-08	3.6e-09	3.61e-08	0	5.29e-08	6.4e-09	1.96e-08
9.4	-0.00014	-3e-05	-0.00021	-0.00019	0	-8e-05	-0.00012	-9e-05		0	0	0	0	0	0	0	0		-0.00014	-3e-05	-0.00021	-0.00019	0	-8e-05	-0.00012	-9e-05		1.96e-08	9e-10	4.41e-08	3.61e-08	0	6.4e-09	1.44e-08	8.1e-09
9.6	-4e-05	-8e-05	4e-05	-0.00019	-0.00015	-0.00013	-0.00012	-0.00014		0	0	0	0	0	0	0	0		-4e-05	-8e-05	4e-05	-0.00019	-0.00015	-0.00013	-0.00012	-0.00014		1.6e-09	6.4e-09	1.6e-09	3.61e-08	2.25e-08	1.69e-08	1.44e-08	1.96e-08
9.8	-4e-05	-0.00018	-1e-05	-0.00024	0	-0.00013	-0.00012	-0.00019		0	0	0	0	0	0	0	0		-4e-05	-0.00018	-1e-05	-0.00024	0	-0.00013	-0.00012	-0.00019		1.6e-09	3.24e-08	1e-10	5.76e-08	0	1.69e-08	1.44e-08	3.61e-08
10	1e-05	7e-05	-0.00021	-0.00019	-0.0002	-0.00013	-7e-05	-0.00014		0	0	0	0	0	0	0	0		1e-05	7e-05	-0.00021	-0.00019	-0.0002	-0.00013	-7e-05	-0.00014		1e-10	4.9e-09	4.41e-08	3.61e-08	4e-08	1.69e-08	4.9e-09	1.96e-08
10.2	-4e-05	-3e-05	9e-05	-0.00019	-0.0002	-8e-05	-7e-05	-0.00014		0	0	0	0	0	0	0	0		-4e-05	-3e-05	9e-05	-0.00019	-0.0002	-8e-05	-7e-05	-0.00014		1.6e-09	9e-10	8.1e-09	3.61e-08	4e-08	6.4e-09	4.9e-09	1.96e-08
10.4	-9e-05	-3e-05	-6e-05	-0.00024	5e-05	0.00027	-2e-05	-0.00019		0	0	0	0	0	0	0	0		-9e-05	-3e-05	-6e-05	-0.00024	5e-05	0.00027	-2e-05	-0.00019		8.1e-09	9e-10	3.6e-09	5.76e-08	2.5e-09	7.29e-08	4e-10	3.61e-08
10.6	0.00011	-0.00013	-0.00011	-0.00024	-0.0001	-0.00013	3e-05	-0.00014		0	0	0	0	0	0	0	0		0.00011	-0.00013	-0.00011	-0.00024	-0.0001	-0.00013	3e-05	-0.00014		1.21e-08	1.69e-08	1.21e-08	5.76e-08	1e-08	1.69e-08	9e-10	1.96e-08
10.8	-9e-05	0.00012	4e-05	-0.00024	-0.00015	-8e-05	-2e-05	-0.00019		0.0389	0.0392	0	0	0	0	0	0		-0.03899	-0.03908	4e-05	-0.00024	-0.00015	-8e-05	-2e-05	-0.00019		0.00152022	0.00152725	1.6e-09	5.76e-08	2.25e-08	6.4e-09	4e-10	3.61e-08
11	-9e-05	0.01222	-6e-05	-0.00024	0.00015	2e-05	-2e-05	-0.00014		0.0567	0.0692	0	0	0	0	0	0		-0.05679	-0.05698	-6e-05	-0.00024	0.00015	2e-05	-2e-05	-0.00014		0.0032251	0.00324672	3.6e-09	5.76e-08	2.25e-08	4e-10	4e-10	1.96e-08
11.2	0.00856	0.01177	-6e-05	-0.00034	0	-0.00013	-7e-05	-9e-05		0.053	0.0745	0.0392	0	0	0	0	0		-0.04444	-0.06273	-0.03926	-0.00034	0	-0.00013	-7e-05	-9e-05		0.00197491	0.00393505	0.00154135	1.156e-07	0	1.69e-08	4.9e-09	8.1e-09
11.4	0.01061	0.01367	0.00559	-0.00024	-5e-05	-8e-05	8e-05	1e-05		0.0514	0.0656	0.0278	0	0	0	0	0		-0.04079	-0.05193	-0.02221	-0.00024	-5e-05	-8e-05	8e-05	1e-05		0.00166382	0.00269672	0.000493284	5.76e-08	2.5e-09	6.4e-09	6.4e-09	1e-10
11.6	0.01181	0.02292	0.01494	-0.00024	-0.0002	2e-05	3e-05	0.00011		0.0541	0.0651	0.0267	0	0	0	0	0		-0.04229	-0.04218	-0.01176	-0.00024	-0.0002	2e-05	3e-05	0.00011		0.00178844	0.00177915	0.000138298	5.76e-08	4e-08	4e-10	9e-10	1.21e-08
11.8	0.01331	0.03092	0.01844	-0.00029	5e-05	-0.00023	-2e-05	0.00026		0.0584	0.0729	0.0262	0.0166	0	0	0	0		-0.04509	-0.04198	-0.00776	-0.01689	5e-05	-0.00023	-2e-05	0.00026		0.00203311	0.00176232	6.02176e-05	0.000285272	2.5e-09	5.29e-08	4e-10	6.76e-08
12	0.01706	0.03382	0.01754	0.00066	0	0.00627	8e-05	0.00016		0.062	0.0793	0.0339	0.0082	0	0.0346	0	0		-0.04494	-0.04548	-0.01636	-0.00754	0	-0.02833	8e-05	0.00016		0.0020196	0.00206843	0.00026765	5.68516e-05	0	0.000802589	6.4e-09	2.56e-08
12.2	0.01746	0.03642	0.01979	0.00136	-0.00015	0.01307	8e-05	0.00011		0.061	0.0812	0.0433	0.0278	0.0119	0.0315	0	0		-0.04354	-0.04478	-0.02351	-0.02644	-0.01205	-0.01843	8e-05	0.00011		0.00189573	0.00200525	0.00055272	0.000699074	0.000145203	0.000339665	6.4e-09	1.21e-08
12.4	0.02076	0.04367	0.02344	0.00266	0.0067	0.01547	0.00033	6e-05		0.0631	0.0808	0.0442	0.0321	0.023	0.0388	0.0124	0		-0.04234	-0.03713	-0.02076	-0.02944	-0.0163	-0.02333	-0.01207	6e-05		0.00179268	0.00137864	0.000430978	0.000866714	0.00026569	0.000544289	0.000145685	3.6e-09
12.6	0.02851	0.04817	0.02414	0.01246	0.0123	0.01622	0.00098	6e-05		0.0631	0.0813	0.0437	0.0315	0.0259	0.0466	0.0083	0		-0.03459	-0.03313	-0.01956	-0.01904	-0.0136	-0.03038	-0.00732	6e-05		0.00119647	0.0010976	0.000382594	0.000362522	0.00018496	0.000922944	5.35824e-05	3.6e-09
12.8	0.03826	0.06057	0.02669	0.01386	0.01965	0.01752	0.00308	1e-05		0.0644	0.0834	0.0434	0.0309	0.0297	0.0464	0.0248	0		-0.02614	-0.02283	-0.01671	-0.01704	-0.01005	-0.02888	-0.02172	1e-05		0.0006833	0.000521209	0.000279224	0.000290362	0.000101003	0.000834054	0.000471758	1e-10
13	0.04916	0.07412	0.02794	0.02156	0.02145	0.01862	0.00578	1e-05		0.0678	0.0843	0.0436	0.0309	0.0341	0.0474	0.0301	0		-0.01864	-0.01018	-0.01566	-0.00934	-0.01265	-0.02878	-0.02432	1e-05		0.00034745	0.000103632	0.000245236	8.72356e-05	0.000160022	0.000828288	0.000591462	1e-10
13.2	0.06541	0.07367	0.02954	0.01996	0.0256	0.01972	0.01258	-0.00124		0.0687	0.0861	0.0448	0.0332	0.0328	0.047	0.0288	0.0226		-0.00329	-0.01243	-0.01526	-0.01324	-0.0072	-0.02728	-0.01622	-0.02384		1.08241e-05	0.000154505	0.000232868	0.000175298	5.184e-05	0.000744198	0.000263088	0.000568346
13.4	0.08311	0.08617	0.03114	0.02486	0.02465	0.02162	0.01458	0.01201		0.0705	0.086	0.0448	0.0374	0.035	0.0487	0.0342	0.0208		0.01261	0.00017	-0.01366	-0.01254	-0.01035	-0.02708	-0.01962	-0.00879		0.000159012	2.89e-08	0.000186596	0.000157252	0.000107123	0.000733326	0.000384944	7.72641e-05
13.6	0.09356	0.10002	0.03409	0.02051	0.02425	0.02432	0.01683	0.01401		0.07	0.0847	0.0454	0.0374	0.0349	0.0523	0.0333	0.022		0.02356	0.01532	-0.01131	-0.01689	-0.01065	-0.02798	-0.01647	-0.00799		0.000555074	0.000234702	0.000127916	0.000285272	0.000113422	0.00078288	0.000271261	6.38401e-05
13.8	0.09211	0.11207	0.03734	0.02026	0.0322	0.03217	0.01813	0.01666		0.069	0.0847	0.0485	0.0396	0.0346	0.0529	0.0369	0.0203		0.02311	0.02737	-0.01116	-0.01934	-0.0024	-0.02073	-0.01877	-0.00364		0.000534072	0.000749117	0.000124546	0.000374036	5.76e-06	0.000429733	0.000352313	1.32496e-05
14	0.08721	0.10767	0.03649	0.02336	0.02875	0.03472	0.01658	0.01921		0.0683	0.0858	0.0505	0.0412	0.0365	0.0538	0.0396	0.0209		0.01891	0.02187	-0.01401	-0.01784	-0.00775	-0.01908	-0.02302	-0.00169		0.000357588	0.000478297	0.00019628	0.000318266	6.00625e-05	0.000364046	0.00052992	2.8561e-06
14.2	0.08866	0.08122	0.03739	0.02111	0.032	0.03662	0.02648	0.01711		0.0681	0.0868	0.0528	0.0418	0.037	0.0542	0.0397	0.0222		0.02056	-0.00558	-0.01541	-0.02069	-0.005	-0.01758	-0.01322	-0.00509		0.000422714	3.11364e-05	0.000237468	0.000428076	2.5e-05	0.000309056	0.000174768	2.59081e-05
14.4	0.06751	0.05867	0.03899	0.02611	0.0382	0.03537	0.03343	0.01686		0.0683	0.0871	0.0537	0.0414	0.038	0.0548	0.0394	0.0227		-0.00079	-0.02843	-0.01471	-0.01529	0.0002	-0.01943	-0.00597	-0.00584		6.241e-07	0.000808265	0.000216384	0.000233784	4e-08	0.000377525	3.56409e-05	3.41056e-05
14.6	0.07586	0.06127	0.03879	0.02996	0.04085	0.03697	0.02658	0.01986		0.071	0.087	0.0528	0.0416	0.0389	0.0553	0.0406	0.0226		0.00486	-0.02573	-0.01401	-0.01164	0.00195	-0.01833	-0.01402	-0.00274		2.36196e-05	0.000662033	0.00019628	0.00013549	3.8025e-06	0.000335989	0.00019656	7.5076e-06
14.8	0.07081	0.06082	0.03624	0.02856	0.0364	0.04277	0.02558	0.02331		0.0739	0.0874	0.0524	0.0423	0.0397	0.0548	0.0418	0.0226		-0.00309	-0.02658	-0.01616	-0.01374	-0.0033	-0.01203	-0.01622	0.00071		9.5481e-06	0.000706496	0.000261146	0.000188788	1.089e-05	0.000144721	0.000263088	5.041e-07
15	0.05986	0.06542	0.03179	0.03486	0.04535	0.05187	0.03303	0.02011		0.0739	0.0882	0.0525	0.043	0.0405	0.0538	0.0425	0.0235		-0.01404	-0.02278	-0.02071	-0.00814	0.00485	-0.00193	-0.00947	-0.00339		0.000197122	0.000518928	0.000428904	6.62596e-05	2.35225e-05	3.7249e-06	8.96809e-05	1.14921e-05
15.2	0.05676	0.06552	0.03439	0.02776	0.04495	0.04847	0.03698	0.01876		0.0734	0.0876	0.0534	0.0442	0.041	0.0541	0.0433	0.0242		-0.01664	-0.02208	-0.01901	-0.01644	0.00395	-0.00563	-0.00632	-0.00544		0.00027689	0.000487526	0.00036138	0.000270274	1.56025e-05	3.16969e-05	3.99424e-05	2.95936e-05
15.4	0.05421	0.06997	0.03574	0.03796	0.0441	0.04777	0.03878	0.02191		0.073	0.0873	0.0554	0.0454	0.0415	0.0549	0.0452	0.0245		-0.01879	-0.01733	-0.01966	-0.00744	0.0026	-0.00713	-0.00642	-0.00259		0.000353064	0.000300329	0.000386516	5.53536e-05	6.76e-06	5.08369e-05	4.12164e-05	6.7081e-06
15.6	0.05036	0.06872	0.03814	0.04091	0.0384	0.04587	0.03318	0.02261		0.0727	0.0893	0.0563	0.0465	0.0421	0.0558	0.0468	0.0248		-0.02234	-0.02058	-0.01816	-0.00559	-0.0037	-0.00993	-0.01362	-0.00219		0.000499076	0.000423536	0.000329786	3.12481e-05	1.369e-05	9.86049e-05	0.000185504	4.7961e-06
15.8	0.06066	0.07227	0.04424	0.03876	0.04365	0.04272	0.03988	0.02541		0.0732	0.0894	0.0567	0.0469	0.0425	0.0562	0.0473	0.0255		-0.01254	-0.01713	-0.01246	-0.00814	0.00115	-0.01348	-0.00742	-9e-05		0.000157252	0.000293437	0.000155252	6.62596e-05	1.3225e-06	0.00018171	5.50564e-05	8.1e-09
16	0.06731	0.07332	0.03969	0.04041	0.0455	0.04337	0.03938	0.02546		0.0729	0.0884	0.0566	0.0474	0.0427	0.0561	0.047	0.0264		-0.00559	-0.01508	-0.01691	-0.00699	0.0028	-0.01273	-0.00762	-0.00094		3.12481e-05	0.000227406	0.000285948	4.88601e-05	7.84e-06	0.000162053	5.80644e-05	8.836e-07
16.2	0.06436	0.06372	0.04259	0.03921	0.0442	0.04602	0.04133	0.03281		0.0734	0.0868	0.0569	0.0475	0.0434	0.0562	0.0468	0.0265		-0.00904	-0.02308	-0.01431	-0.00829	0.0008	-0.01018	-0.00547	0.00631		8.17216e-05	0.000532686	0.000204776	6.87241e-05	6.4e-07	0.000103632	2.99209e-05	3.98161e-05
16.4	0.06821	0.07677	0.04159	0.04831	0.0434	0.04847	0.03748	0.03076		0.073	0.0852	0.057	0.0475	0.0441	0.0565	0.0475	0.0265		-0.00479	-0.00843	-0.01541	0.00081	-0.0007	-0.00803	-0.01002	0.00426		2.29441e-05	7.10649e-05	0.000237468	6.561e-07	4.9e-07	6.44809e-05	0.0001004	1.81476e-05
16.6	0.06966	0.08267	0.04069	0.04286	0.0529	0.05132	0.03973	0.02791		0.0722	0.0834	0.056	0.048	0.0442	0.0568	0.0485	0.0266		-0.00254	-0.00073	-0.01531	-0.00514	0.0087	-0.00548	-0.00877	0.00131		6.4516e-06	5.329e-07	0.000234396	2.64196e-05	7.569e-05	3.00304e-05	7.69129e-05	1.7161e-06
16.8	0.07811	0.07867	0.04249	0.04676	0.05315	0.04997	0.03463	0.02311		0.0706	0.0829	0.0552	0.0481	0.0442	0.0565	0.0494	0.0269		0.00751	-0.00423	-0.01271	-0.00134	0.00895	-0.00653	-0.01477	-0.00379		5.64001e-05	1.78929e-05	0.000161544	1.7956e-06	8.01025e-05	4.26409e-05	0.000218153	1.43641e-05
17	0.08626	0.08157	0.03964	0.05101	0.0476	0.05247	0.04443	0.02456		0.0702	0.0829	0.0553	0.0482	0.0439	0.056	0.049	0.0271		0.01606	-0.00133	-0.01566	0.00281	0.0037	-0.00353	-0.00457	-0.00254		0.000257924	1.7689e-06	0.000245236	7.8961e-06	1.369e-05	1.24609e-05	2.08849e-05	6.4516e-06
17.2	0.08441	0.08422	0.03949	0.04191	0.04965	0.04977	0.04223	0.02706		0.0697	0.0825	0.0557	0.0479	0.0437	0.0555	0.0487	0.0272		0.01471	0.00172	-0.01621	-0.00599	0.00595	-0.00573	-0.00647	-0.00014		0.000216384	2.9584e-06	0.000262764	3.58801e-05	3.54025e-05	3.28329e-05	4.18609e-05	1.96e-08
17.4	0.08701	0.08477	0.03994	0.04271	0.0484	0.05367	0.04253	0.02731		0.0692	0.0818	0.0553	0.0479	0.0435	0.0554	0.0482	0.027		0.01781	0.00297	-0.01536	-0.00519	0.0049	-0.00173	-0.00567	0.00031		0.000317196	8.8209e-06	0.00023593	2.69361e-05	2.401e-05	2.9929e-06	3.21489e-05	9.61e-08
17.6	0.07881	0.08287	0.03749	0.03821	0.04505	0.05327	0.04738	0.03041		0.0683	0.081	0.0552	0.0477	0.0433	0.0555	0.0482	0.0268		0.01051	0.00187	-0.01771	-0.00949	0.00175	-0.00223	-0.00082	0.00361		0.00011046	3.4969e-06	0.000313644	9.00601e-05	3.0625e-06	4.9729e-06	6.724e-07	1.30321e-05
17.8	0.07731	0.08347	0.03819	0.04576	0.0425	0.05247	0.04328	0.03136		0.0677	0.0808	0.0552	0.0474	0.0434	0.055	0.0485	0.0266		0.00961	0.00267	-0.01701	-0.00164	-0.0009	-0.00253	-0.00522	0.00476		9.23521e-05	7.1289e-06	0.00028934	2.6896e-06	8.1e-07	6.4009e-06	2.72484e-05	2.26576e-05
18	0.07666	0.08562	0.03779	0.04756	0.0511	0.05212	0.04523	0.02721		0.0674	0.0808	0.0554	0.0474	0.0432	0.0548	0.0485	0.0265		0.00926	0.00482	-0.01761	0.00016	0.0079	-0.00268	-0.00327	0.00071		8.57476e-05	2.32324e-05	0.000310112	2.56e-08	6.241e-05	7.1824e-06	1.06929e-05	5.041e-07
18.2	0.07911	0.08342	0.03909	0.04761	0.051	0.05922	0.03873	0.02861		0.0675	0.0797	0.0549	0.0473	0.0429	0.055	0.0483	0.0265		0.01161	0.00372	-0.01581	0.00031	0.0081	0.00422	-0.00957	0.00211		0.000134792	1.38384e-05	0.000249956	9.61e-08	6.561e-05	1.78084e-05	9.15849e-05	4.4521e-06
18.4	0.07806	0.07852	0.03529	0.04041	0.0569	0.05532	0.04853	0.02506		0.0674	0.0775	0.0541	0.0473	0.0426	0.0551	0.0481	0.0262		0.01066	0.00102	-0.01881	-0.00689	0.0143	0.00022	0.00043	-0.00114		0.000113636	1.0404e-06	0.000353816	4.74721e-05	0.00020449	4.84e-08	1.849e-07	1.2996e-06
18.6	0.07841	0.07867	0.03644	0.05411	0.04695	0.05227	0.04578	0.02576		0.0665	0.0757	0.0532	0.047	0.0422	0.0548	0.0479	0.0261		0.01191	0.00297	-0.01676	0.00711	0.00475	-0.00253	-0.00212	-0.00034		0.000141848	8.8209e-06	0.000280898	5.05521e-05	2.25625e-05	6.4009e-06	4.4944e-06	1.156e-07
18.8	0.08076	0.08132	0.03479	0.04241	0.05105	0.05247	0.04353	0.02801		0.0659	0.0746	0.0529	0.0464	0.0423	0.0541	0.0475	0.0259		0.01486	0.00672	-0.01811	-0.00399	0.00875	-0.00163	-0.00397	0.00211		0.00022082	4.51584e-05	0.000327972	1.59201e-05	7.65625e-05	2.6569e-06	1.57609e-05	4.4521e-06
19	0.07706	0.08272	0.03654	0.04636	0.0543	0.06187	0.04563	0.02926		0.0649	0.0734	0.0534	0.0461	0.0423	0.0534	0.0472	0.0257		0.01216	0.00932	-0.01686	0.00026	0.012	0.00847	-0.00157	0.00356		0.000147866	8.68624e-05	0.00028426	6.76e-08	0.000144	7.17409e-05	2.4649e-06	1.26736e-05
19.2	0.07726	0.07862	0.03274	0.04636	0.0486	0.06807	0.05043	0.02821		0.0641	0.0724	0.0534	0.0458	0.0421	0.0529	0.0469	0.0256		0.01316	0.00622	-0.02066	0.00056	0.0065	0.01517	0.00353	0.00261		0.000173186	3.86884e-05	0.000426836	3.136e-07	4.225e-05	0.000230129	1.24609e-05	6.8121e-06
19.4	0.07906	0.07647	0.03329	0.03971	0.0493	0.05462	0.04203	0.02636		0.0643	0.072	0.0535	0.0456	0.0418	0.0526	0.0468	0.0255		0.01476	0.00447	-0.02021	-0.00589	0.0075	0.00202	-0.00477	0.00086		0.000217858	1.99809e-05	0.000408444	3.46921e-05	5.625e-05	4.0804e-06	2.27529e-05	7.396e-07
19.6	0.07561	0.08287	0.03539	0.04016	0.054	0.04997	0.04878	0.02656		0.0635	0.0717	0.0532	0.0457	0.0415	0.0521	0.0467	0.0254		0.01211	0.01117	-0.01781	-0.00554	0.0125	-0.00213	0.00208	0.00116		0.000146652	0.000124769	0.000317196	3.06916e-05	0.00015625	4.5369e-06	4.3264e-06	1.3456e-06
19.8	0.06921	0.08357	0.03439	0.05011	0.05205	0.05162	0.03913	0.02651		0.0628	0.0717	0.0524	0.0455	0.0414	0.0517	0.0466	0.0253		0.00641	0.01187	-0.01801	0.00461	0.01065	-8e-05	-0.00747	0.00121		4.10881e-05	0.000140897	0.00032436	2.12521e-05	0.000113422	6.4e-09	5.58009e-05	1.4641e-06
20	0.07251	0.07517	0.03359	0.04581	0.0475	0.06012	0.04643	0.02841		0.0621	0.0714	0.0521	0.0449	0.0412	0.0511	0.0464	0.0253		0.01041	0.00377	-0.01851	0.00091	0.0063	0.00902	3e-05	0.00311		0.000108368	1.42129e-05	0.00034262	8.281e-07	3.969e-05	8.13604e-05	9e-10	9.6721e-06
20.2	0.07461	0.07322	0.03374	0.04361	0.04805	0.05912	0.04088	0.02961		0.0612	0.071	0.0517	0.0447	0.0409	0.0507	0.0462	0.0252		0.01341	0.00222	-0.01796	-0.00109	0.00715	0.00842	-0.00532	0.00441		0.000179828	4.9284e-06	0.000322562	1.1881e-06	5.11225e-05	7.08964e-05	2.83024e-05	1.94481e-05
20.4	0.07411	0.07272	0.03259	0.04481	0.04695	0.05577	0.04968	0.02836		0.0604	0.0711	0.0509	0.045	0.0406	0.0504	0.0461	0.025		0.01371	0.00162	-0.01831	-0.00019	0.00635	0.00537	0.00358	0.00336		0.000187964	2.6244e-06	0.000335256	3.61e-08	4.03225e-05	2.88369e-05	1.28164e-05	1.12896e-05
20.6	0.07051	0.06922	0.03459	0.04176	0.0447	0.05437	0.04268	0.02691		0.0599	0.0716	0.0503	0.045	0.0403	0.0501	0.0458	0.0248		0.01061	-0.00238	-0.01571	-0.00324	0.0044	0.00427	-0.00312	0.00211		0.000112572	5.6644e-06	0.000246804	1.04976e-05	1.936e-05	1.82329e-05	9.7344e-06	4.4521e-06
20.8	0.07006	0.07247	0.03779	0.04531	0.04605	0.05012	0.03968	0.02541		0.0595	0.0714	0.0497	0.0447	0.0399	0.0498	0.0454	0.0246		0.01056	0.00107	-0.01191	0.00061	0.00615	0.00032	-0.00572	0.00081		0.000111514	1.1449e-06	0.000141848	3.721e-07	3.78225e-05	1.024e-07	3.27184e-05	6.561e-07
21	0.07141	0.06942	0.03589	0.04281	0.04915	0.04652	0.04328	0.02396		0.0589	0.0708	0.0497	0.0438	0.0395	0.0497	0.0453	0.0245		0.01251	-0.00138	-0.01381	-0.00099	0.00965	-0.00318	-0.00202	-0.00054		0.0001565	1.9044e-06	0.000190716	9.801e-07	9.31225e-05	1.01124e-05	4.0804e-06	2.916e-07
21.2	0.06961	0.07017	0.03404	0.04411	0.0502	0.05617	0.03663	0.02631		0.0583	0.0703	0.0498	0.043	0.039	0.05	0.0454	0.0244		0.01131	-0.00013	-0.01576	0.00111	0.0112	0.00617	-0.00877	0.00191		0.000127916	1.69e-08	0.000248378	1.2321e-06	0.00012544	3.80689e-05	7.69129e-05	3.6481e-06
21.4	0.06981	0.07657	0.03364	0.03941	0.05025	0.05207	0.04488	0.02836		0.058	0.07	0.0496	0.0425	0.0385	0.0503	0.0452	0.0241		0.01181	0.00657	-0.01596	-0.00309	0.01175	0.00177	-0.00032	0.00426		0.000139476	4.31649e-05	0.000254722	9.5481e-06	0.000138063	3.1329e-06	1.024e-07	1.81476e-05
21.6	0.07291	0.08447	0.03209	0.04501	0.04885	0.04987	0.04598	0.02801		0.0582	0.07	0.049	0.0423	0.0383	0.0502	0.0451	0.0238		0.01471	0.01447	-0.01691	0.00271	0.01055	-0.00033	0.00088	0.00421		0.000216384	0.000209381	0.000285948	7.3441e-06	0.000111302	1.089e-07	7.744e-07	1.77241e-05
21.8	0.06981	0.07972	0.03409	0.04036	0.0446	0.05502	0.04103	0.02611		0.0582	0.0698	0.0487	0.0424	0.0383	0.0497	0.0447	0.0235		0.01161	0.00992	-0.01461	-0.00204	0.0063	0.00532	-0.00367	0.00261		0.000134792	9.84064e-05	0.000213452	4.1616e-06	3.969e-05	2.83024e-05	1.34689e-05	6.8121e-06
22	0.06906	0.07917	0.03089	0.04221	0.04585	0.05482	0.04388	0.02666		0.058	0.0691	0.0485	0.0422	0.0382	0.049	0.0442	0.0232		0.01106	0.01007	-0.01761	1e-05	0.00765	0.00582	-0.00032	0.00346		0.000122324	0.000101405	0.000310112	1e-10	5.85225e-05	3.38724e-05	1.024e-07	1.19716e-05
22.2	0.06761	0.07577	0.03069	0.03986	0.0501	0.05122	0.03768	0.02606		0.0575	0.0685	0.0481	0.0419	0.0379	0.0484	0.0438	0.023		0.01011	0.00727	-0.01741	-0.00204	0.0122	0.00282	-0.00612	0.00306		0.000102212	5.28529e-05	0.000303108	4.1616e-06	0.00014884	7.9524e-06	3.74544e-05	9.3636e-06
22.4	0.07041	0.07037	0.03219	0.04101	0.0436	0.04952	0.04458	0.03166		0.0572	0.0679	0.0479	0.0416	0.0376	0.0481	0.0435	0.0228		0.01321	0.00247	-0.01571	-0.00059	0.006	0.00142	0.00108	0.00886		0.000174504	6.1009e-06	0.000246804	3.481e-07	3.6e-05	2.0164e-06	1.1664e-06	7.84996e-05
22.6	0.06881	0.07157	0.03089	0.04486	0.04545	0.05312	0.03978	0.02636		0.0569	0.0677	0.0477	0.0414	0.0372	0.0479	0.0433	0.0226		0.01191	0.00387	-0.01681	0.00346	0.00825	0.00522	-0.00352	0.00376		0.000141848	1.49769e-05	0.000282576	1.19716e-05	6.80625e-05	2.72484e-05	1.23904e-05	1.41376e-05
22.8	0.06726	0.07132	0.02999	0.03686	0.0454	0.05347	0.04093	0.02656		0.0567	0.0673	0.047	0.0413	0.0369	0.0477	0.0432	0.0224		0.01056	0.00402	-0.01701	-0.00444	0.0085	0.00577	-0.00227	0.00416		0.000111514	1.61604e-05	0.00028934	1.97136e-05	7.225e-05	3.32929e-05	5.1529e-06	1.73056e-05
23	0.06541	0.07512	0.03029	0.04761	0.0474	0.05477	0.03948	0.02391		0.0564	0.0667	0.0467	0.0411	0.0366	0.0476	0.0431	0.0225		0.00901	0.00842	-0.01641	0.00651	0.0108	0.00717	-0.00362	0.00141		8.11801e-05	7.08964e-05	0.000269288	4.23801e-05	0.00011664	5.14089e-05	1.31044e-05	1.9881e-06
23.2	0.06816	0.07192	0.03129	0.03671	0.0513	0.04967	0.04133	0.02721		0.0564	0.0663	0.0466	0.0407	0.0364	0.0475	0.043	0.0225		0.01176	0.00562	-0.01531	-0.00399	0.0149	0.00217	-0.00167	0.00471		0.000138298	3.15844e-05	0.000234396	1.59201e-05	0.00022201	4.7089e-06	2.7889e-06	2.21841e-05
23.4	0.06706	0.07177	0.03264	0.04291	0.04185	0.05122	0.04348	0.02741		0.0564	0.0662	0.0468	0.0404	0.0362	0.0475	0.0428	0.0223		0.01066	0.00557	-0.01416	0.00251	0.00565	0.00372	0.00068	0.00511		0.000113636	3.10249e-05	0.000200506	6.3001e-06	3.19225e-05	1.38384e-05	4.624e-07	2.61121e-05
23.6	0.06556	0.07472	0.03154	0.04106	0.04105	0.04547	0.03843	0.02836		0.0564	0.0662	0.0469	0.0401	0.0361	0.0475	0.0427	0.0221		0.00916	0.00852	-0.01536	0.00096	0.00495	-0.00203	-0.00427	0.00626		8.39056e-05	7.25904e-05	0.00023593	9.216e-07	2.45025e-05	4.1209e-06	1.82329e-05	3.91876e-05
23.8	0.06931	0.07867	0.03239	0.03876	0.0415	0.04672	0.04058	0.02721		0.056	0.0661	0.0467	0.0401	0.0359	0.0474	0.0426	0.0219		0.01331	0.01257	-0.01431	-0.00134	0.0056	-0.00068	-0.00202	0.00531		0.000177156	0.000158005	0.000204776	1.7956e-06	3.136e-05	4.624e-07	4.0804e-06	2.81961e-05
24	0.06516	0.07277	0.03154	0.04006	0.04555	0.04922	0.03828	0.02461		0.0556	0.0657	0.0466	0.0402	0.0359	0.0472	0.0425	0.0218		0.00956	0.00707	-0.01506	-0.00014	0.00965	0.00202	-0.00422	0.00281		9.13936e-05	4.99849e-05	0.000226804	1.96e-08	9.31225e-05	4.0804e-06	1.78084e-05	7.8961e-06
24.2	0.06541	0.06802	0.03074	0.03906	0.0509	0.04892	0.04143	0.02436		0.0552	0.065	0.0465	0.0402	0.0357	0.0469	0.0422	0.0217		0.01021	0.00302	-0.01576	-0.00114	0.0152	0.00202	-0.00077	0.00266		0.000104244	9.1204e-06	0.000248378	1.2996e-06	0.00023104	4.0804e-06	5.929e-07	7.0756e-06
24.4	0.06706	0.07067	0.03139	0.03961	0.04015	0.04947	0.04038	0.02646		0.0554	0.0648	0.0465	0.04	0.0357	0.0465	0.0418	0.0216		0.01166	0.00587	-0.01511	-0.00039	0.00445	0.00297	-0.00142	0.00486		0.000135956	3.44569e-05	0.000228312	1.521e-07	1.98025e-05	8.8209e-06	2.0164e-06	2.36196e-05
24.6	0.06921	0.06927	0.03174	0.04081	0.04155	0.04947	0.03693	0.02791		0.0557	0.0648	0.0463	0.0399	0.0356	0.0462	0.0416	0.0216		0.01351	0.00447	-0.01456	0.00091	0.00595	0.00327	-0.00467	0.00631		0.00018252	1.99809e-05	0.000211994	8.281e-07	3.54025e-05	1.06929e-05	2.18089e-05	3.98161e-05
24.8	0.06461	0.07117	0.03129	0.03836	0.03905	0.04907	0.04058	0.02486		0.0552	0.0647	0.0461	0.0397	0.0354	0.046	0.0416	0.0215		0.00941	0.00647	-0.01481	-0.00134	0.00365	0.00307	-0.00102	0.00336		8.85481e-05	4.18609e-05	0.000219336	1.7956e-06	1.33225e-05	9.4249e-06	1.0404e-06	1.12896e-05
25	0.06586	0.06962	0.03109	0.03606	0.04335	0.04432	0.04208	0.02516		0.0544	0.0643	0.0459	0.0396	0.0353	0.0461	0.0417	0.0215		0.01146	0.00532	-0.01481	-0.00354	0.00805	-0.00178	0.00038	0.00366		0.000131332	2.83024e-05	0.000219336	1.25316e-05	6.48025e-05	3.1684e-06	1.444e-07	1.33956e-05
25.2	0.06271	0.06442	0.03309	0.03996	0.04475	0.04727	0.03873	0.02496		0.0537	0.0639	0.0459	0.0395	0.0351	0.0464	0.0418	0.0214		0.00901	0.00052	-0.01281	0.00046	0.00965	0.00087	-0.00307	0.00356		8.11801e-05	2.704e-07	0.000164096	2.116e-07	9.31225e-05	7.569e-07	9.4249e-06	1.26736e-05
25.4	0.06366	0.06572	0.03154	0.03616	0.0414	0.05037	0.03878	0.02496		0.0537	0.0639	0.0462	0.0395	0.0352	0.0466	0.0418	0.0214		0.00996	0.00182	-0.01466	-0.00334	0.0062	0.00377	-0.00302	0.00356		9.92016e-05	3.3124e-06	0.000214916	1.11556e-05	3.844e-05	1.42129e-05	9.1204e-06	1.26736e-05
25.6	0.06291	0.06462	0.03019	0.03946	0.04295	0.04717	0.04038	0.02716		0.0537	0.0636	0.0462	0.0394	0.0352	0.0466	0.0416	0.0213		0.00921	0.00102	-0.01601	6e-05	0.00775	0.00057	-0.00122	0.00586		8.48241e-05	1.0404e-06	0.00025632	3.6e-09	6.00625e-05	3.249e-07	1.4884e-06	3.43396e-05
25.8	0.06586	0.06857	0.03134	0.03446	0.0444	0.04312	0.03753	0.02371		0.0536	0.063	0.0455	0.0391	0.035	0.0461	0.0414	0.0213		0.01226	0.00557	-0.01416	-0.00464	0.0094	-0.00298	-0.00387	0.00241		0.000150308	3.10249e-05	0.000200506	2.15296e-05	8.836e-05	8.8804e-06	1.49769e-05	5.8081e-06
26	0.06616	0.06957	0.03199	0.03601	0.0384	0.04022	0.03778	0.02631		0.0537	0.0624	0.0448	0.0391	0.0346	0.0455	0.041	0.0213		0.01246	0.00717	-0.01281	-0.00309	0.0038	-0.00528	-0.00322	0.00501		0.000155252	5.14089e-05	0.000164096	9.5481e-06	1.444e-05	2.78784e-05	1.03684e-05	2.51001e-05
26.2	0.06071	0.06967	0.03084	0.03621	0.03635	0.04492	0.03953	0.02496		0.0536	0.062	0.0448	0.0388	0.0344	0.045	0.0407	0.0211		0.00711	0.00767	-0.01396	-0.00259	0.00195	-8e-05	-0.00117	0.00386		5.05521e-05	5.88289e-05	0.000194882	6.7081e-06	3.8025e-06	6.4e-09	1.3689e-06	1.48996e-05
26.4	0.06276	0.07107	0.03059	0.03476	0.0376	0.04987	0.03623	0.02441		0.0535	0.0617	0.0451	0.0384	0.0344	0.0447	0.0405	0.0209		0.00926	0.00937	-0.01451	-0.00364	0.0032	0.00517	-0.00427	0.00351		8.57476e-05	8.77969e-05	0.00021054	1.32496e-05	1.024e-05	2.67289e-05	1.82329e-05	1.23201e-05
26.6	0.06461	0.06337	0.03094	0.03766	0.0405	0.04397	0.03733	0.02451		0.0533	0.0618	0.0451	0.0382	0.0342	0.0448	0.0404	0.0208		0.01131	0.00157	-0.01416	-0.00054	0.0063	-0.00083	-0.00307	0.00371		0.000127916	2.4649e-06	0.000200506	2.916e-07	3.969e-05	6.889e-07	9.4249e-06	1.37641e-05
26.8	0.06291	0.06372	0.02989	0.03656	0.047	0.04287	0.03568	0.02191		0.0534	0.0618	0.045	0.0381	0.0341	0.045	0.0405	0.0208		0.00951	0.00192	-0.01511	-0.00154	0.0129	-0.00213	-0.00482	0.00111		9.04401e-05	3.6864e-06	0.000228312	2.3716e-06	0.00016641	4.5369e-06	2.32324e-05	1.2321e-06
27	0.05966	0.06822	0.03214	0.03841	0.0413	0.04377	0.03543	0.02221		0.0534	0.0617	0.0448	0.0381	0.034	0.0451	0.0405	0.0208		0.00626	0.00652	-0.01266	0.00031	0.0073	-0.00133	-0.00507	0.00141		3.91876e-05	4.25104e-05	0.000160276	9.61e-08	5.329e-05	1.7689e-06	2.57049e-05	1.9881e-06
27.2	0.06446	0.06877	0.02984	0.03771	0.0394	0.04657	0.03998	0.02356		0.0534	0.0613	0.0447	0.038	0.0339	0.0451	0.0404	0.0207		0.01106	0.00747	-0.01486	-0.00029	0.0055	0.00147	-0.00042	0.00286		0.000122324	5.58009e-05	0.00022082	8.41e-08	3.025e-05	2.1609e-06	1.764e-07	8.1796e-06
27.4	0.06561	0.06682	0.03174	0.03806	0.03765	0.04262	0.03428	0.02361		0.0532	0.0611	0.0448	0.038	0.034	0.045	0.0402	0.0207		0.01241	0.00572	-0.01306	6e-05	0.00365	-0.00238	-0.00592	0.00291		0.000154008	3.27184e-05	0.000170564	3.6e-09	1.33225e-05	5.6644e-06	3.50464e-05	8.4681e-06
27.6	0.06211	0.07087	0.03374	0.03861	0.0442	0.04192	0.04008	0.02441		0.0533	0.0612	0.0448	0.0381	0.034	0.0447	0.04	0.0206		0.00881	0.00967	-0.01106	0.00051	0.0102	-0.00278	8e-05	0.00381		7.76161e-05	9.35089e-05	0.000122324	2.601e-07	0.00010404	7.7284e-06	6.4e-09	1.45161e-05
27.8	0.06216	0.06657	0.02934	0.03636	0.0425	0.04047	0.03368	0.02471		0.0533	0.061	0.0447	0.0383	0.0342	0.0445	0.0399	0.0206		0.00886	0.00557	-0.01536	-0.00194	0.0083	-0.00403	-0.00622	0.00411		7.84996e-05	3.10249e-05	0.00023593	3.7636e-06	6.889e-05	1.62409e-05	3.86884e-05	1.68921e-05
28	0.06066	0.06622	0.03049	0.03886	0.04095	0.04487	0.03913	0.02276		0.0528	0.0606	0.0446	0.0383	0.0342	0.0443	0.0399	0.0205		0.00786	0.00562	-0.01411	0.00056	0.00675	0.00057	-0.00077	0.00226		6.17796e-05	3.15844e-05	0.000199092	3.136e-07	4.55625e-05	3.249e-07	5.929e-07	5.1076e-06
28.2	0.06221	0.06537	0.03129	0.03481	0.03705	0.04502	0.03293	0.02611		0.0525	0.0602	0.0445	0.0381	0.034	0.0442	0.0399	0.0206		0.00971	0.00517	-0.01321	-0.00329	0.00305	0.00082	-0.00697	0.00551		9.42841e-05	2.67289e-05	0.000174504	1.08241e-05	9.3025e-06	6.724e-07	4.85809e-05	3.03601e-05
28.4	0.06071	0.06457	0.03234	0.03716	0.03525	0.04107	0.04073	0.02276		0.0523	0.06	0.0445	0.0378	0.0338	0.0443	0.0399	0.0206		0.00841	0.00457	-0.01216	-0.00064	0.00145	-0.00323	0.00083	0.00216		7.07281e-05	2.08849e-05	0.000147866	4.096e-07	2.1025e-06	1.04329e-05	6.889e-07	4.6656e-06
28.6	0.06111	0.06277	0.03239	0.03946	0.0409	0.04297	0.03578	0.02521		0.0524	0.0599	0.0444	0.0377	0.0337	0.0443	0.0398	0.0206		0.00871	0.00287	-0.01201	0.00176	0.0072	-0.00133	-0.00402	0.00461		7.58641e-05	8.2369e-06	0.00014424	3.0976e-06	5.184e-05	1.7689e-06	1.61604e-05	2.12521e-05
28.8	0.06111	0.05982	0.02999	0.03326	0.0371	0.04502	0.03608	0.02321		0.0524	0.0597	0.0441	0.0378	0.0336	0.0443	0.0398	0.0206		0.00871	0.00012	-0.01411	-0.00454	0.0035	0.00072	-0.00372	0.00261		7.58641e-05	1.44e-08	0.000199092	2.06116e-05	1.225e-05	5.184e-07	1.38384e-05	6.8121e-06
29	0.06246	0.06117	0.02999	0.03876	0.03765	0.04407	0.03348	0.02311		0.0522	0.0594	0.0438	0.0376	0.0337	0.0442	0.0398	0.0206		0.01026	0.00177	-0.01381	0.00116	0.00395	-0.00013	-0.00632	0.00251		0.000105268	3.1329e-06	0.000190716	1.3456e-06	1.56025e-05	1.69e-08	3.99424e-05	6.3001e-06
29.2	0.05706	0.06727	0.03174	0.03406	0.0342	0.04207	0.03653	0.02496		0.052	0.0592	0.0438	0.0375	0.0336	0.044	0.0397	0.0206		0.00506	0.00807	-0.01206	-0.00344	0.0006	-0.00193	-0.00317	0.00436		2.56036e-05	6.51249e-05	0.000145444	1.18336e-05	3.6e-07	3.7249e-06	1.00489e-05	1.90096e-05
29.4	0.06121	0.06727	0.02949	0.03786	0.0358	0.04107	0.03613	0.02216		0.0519	0.0593	0.0439	0.0373	0.0335	0.0438	0.0395	0.0206		0.00931	0.00797	-0.01441	0.00056	0.0023	-0.00273	-0.00337	0.00156		8.66761e-05	6.35209e-05	0.000207648	3.136e-07	5.29e-06	7.4529e-06	1.13569e-05	2.4336e-06
29.6	0.05911	0.06512	0.03379	0.03436	0.0394	0.04022	0.03458	0.02436		0.0519	0.0595	0.0441	0.0373	0.0334	0.0436	0.0393	0.0204		0.00721	0.00562	-0.01031	-0.00294	0.006	-0.00338	-0.00472	0.00396		5.19841e-05	3.15844e-05	0.000106296	8.6436e-06	3.6e-05	1.14244e-05	2.22784e-05	1.56816e-05
29.8	0.06011	0.06682	0.03284	0.03486	0.0406	0.04437	0.03343	0.02131		0.0517	0.0592	0.0439	0.0374	0.0334	0.0436	0.0391	0.0203		0.00841	0.00762	-0.01106	-0.00254	0.0072	0.00077	-0.00567	0.00101		7.07281e-05	5.80644e-05	0.000122324	6.4516e-06	5.184e-05	5.929e-07	3.21489e-05	1.0201e-06
30	0.05966	0.07052	0.02889	0.03951	0.04505	0.04197	0.03393	0.02361		0.0512	0.0589	0.0435	0.0374	0.0333	0.0435	0.0391	0.0203		0.00846	0.01162	-0.01461	0.00211	0.01175	-0.00153	-0.00517	0.00331		7.15716e-05	0.000135024	0.000213452	4.4521e-06	0.000138062	2.3409e-06	2.67289e-05	1.09561e-05
30.2	0.06161	0.07612	0.02794	0.03181	0.04165	0.03877	0.03548	0.02586		0.051	0.0585	0.0434	0.0371	0.0333	0.0435	0.0391	0.0203		0.01061	0.01762	-0.01546	-0.00529	0.00835	-0.00473	-0.00362	0.00556		0.000112572	0.000310464	0.000239012	2.79841e-05	6.97225e-05	2.23729e-05	1.31044e-05	3.09136e-05
30.4	0.06101	0.06772	0.03264	0.03846	0.03925	0.04107	0.03428	0.02436		0.0507	0.058	0.0435	0.0369	0.0331	0.0434	0.0391	0.0204		0.01031	0.00972	-0.01086	0.00156	0.00615	-0.00233	-0.00482	0.00396		0.000106296	9.44784e-05	0.00011794	2.4336e-06	3.78225e-05	5.4289e-06	2.32324e-05	1.56816e-05
30.6	0.05826	0.07232	0.03029	0.03391	0.041	0.04182	0.04083	0.02356		0.0503	0.0577	0.0433	0.0367	0.033	0.0433	0.039	0.0204		0.00796	0.01462	-0.01301	-0.00279	0.008	-0.00148	0.00183	0.00316		6.33616e-05	0.000213744	0.00016926	7.7841e-06	6.4e-05	2.1904e-06	3.3489e-06	9.9856e-06
30.8	0.06001	0.07132	0.03089	0.03396	0.03875	0.04072	0.02983	0.02346		0.0503	0.0575	0.0429	0.0367	0.0329	0.0432	0.0388	0.0203		0.00971	0.01382	-0.01201	-0.00274	0.00585	-0.00248	-0.00897	0.00316		9.42841e-05	0.000190992	0.00014424	7.5076e-06	3.42225e-05	6.1504e-06	8.04609e-05	9.9856e-06
31	0.05866	0.07052	0.02904	0.03381	0.03685	0.04342	0.03828	0.02376		0.0503	0.0574	0.0425	0.0367	0.0328	0.043	0.0387	0.0202		0.00836	0.01312	-0.01346	-0.00289	0.00405	0.00042	-0.00042	0.00356		6.98896e-05	0.000172134	0.000181172	8.3521e-06	1.64025e-05	1.764e-07	1.764e-07	1.26736e-05
31.2	0.05781	0.07362	0.02839	0.03061	0.0382	0.04752	0.02913	0.02351		0.0502	0.0572	0.0424	0.0364	0.0327	0.0427	0.0386	0.0202		0.00761	0.01642	-0.01401	-0.00579	0.0055	0.00482	-0.00947	0.00331		5.79121e-05	0.000269616	0.00019628	3.35241e-05	3.025e-05	2.32324e-05	8.96809e-05	1.09561e-05
31.4	0.05936	0.07617	0.02894	0.03806	0.0407	0.04087	0.03713	0.02391		0.0501	0.0568	0.0423	0.0362	0.0325	0.0424	0.0384	0.0201		0.00926	0.01937	-0.01336	0.00186	0.0082	-0.00153	-0.00127	0.00381		8.57476e-05	0.000375197	0.00017849	3.4596e-06	6.724e-05	2.3409e-06	1.6129e-06	1.45161e-05
31.6	0.05861	0.06992	0.02784	0.03126	0.04035	0.03712	0.03233	0.02171		0.0499	0.0565	0.0424	0.036	0.0323	0.0423	0.0382	0.0201		0.00871	0.01342	-0.01456	-0.00474	0.00805	-0.00518	-0.00587	0.00161		7.58641e-05	0.000180096	0.000211994	2.24676e-05	6.48025e-05	2.68324e-05	3.44569e-05	2.5921e-06
31.8	0.05646	0.07137	0.02949	0.03446	0.04045	0.03722	0.02918	0.02281		0.0495	0.0563	0.0422	0.036	0.0322	0.0423	0.038	0.0199		0.00696	0.01507	-0.01271	-0.00154	0.00825	-0.00508	-0.00882	0.00291		4.84416e-05	0.000227105	0.000161544	2.3716e-06	6.80625e-05	2.58064e-05	7.77924e-05	8.4681e-06
32	0.05936	0.07292	0.02984	0.03631	0.03635	0.04052	0.03813	0.02256		0.0492	0.0562	0.0419	0.0361	0.0322	0.0422	0.038	0.0198		0.01016	0.01672	-0.01206	0.00021	0.00415	-0.00168	0.00013	0.00276		0.000103226	0.000279558	0.000145444	4.41e-08	1.72225e-05	2.8224e-06	1.69e-08	7.6176e-06
32.2	0.05726	0.06657	0.02979	0.03276	0.03975	0.04292	0.03138	0.02606		0.0487	0.0561	0.0417	0.036	0.0322	0.0421	0.0381	0.0198		0.00856	0.01047	-0.01191	-0.00324	0.00755	0.00082	-0.00672	0.00626		7.32736e-05	0.000109621	0.000141848	1.04976e-05	5.70025e-05	6.724e-07	4.51584e-05	3.91876e-05
32.4	0.05766	0.06392	0.02984	0.03556	0.0365	0.04242	0.03693	0.02411		0.0484	0.056	0.0416	0.0358	0.032	0.0419	0.038	0.0198		0.00926	0.00792	-0.01176	-0.00024	0.0045	0.00052	-0.00107	0.00431		8.57476e-05	6.27264e-05	0.000138298	5.76e-08	2.025e-05	2.704e-07	1.1449e-06	1.85761e-05
32.6	0.05781	0.06422	0.03064	0.03301	0.039	0.03887	0.03263	0.02371		0.0483	0.0558	0.0416	0.0355	0.0318	0.0417	0.0379	0.0198		0.00951	0.00842	-0.01096	-0.00249	0.0072	-0.00283	-0.00527	0.00391		9.04401e-05	7.08964e-05	0.000120122	6.2001e-06	5.184e-05	8.0089e-06	2.77729e-05	1.52881e-05
32.8	0.05606	0.06102	0.03024	0.03281	0.0426	0.03952	0.03323	0.02281		0.0482	0.0554	0.0415	0.0353	0.0316	0.0416	0.0376	0.0197		0.00786	0.00562	-0.01126	-0.00249	0.011	-0.00208	-0.00437	0.00311		6.17796e-05	3.15844e-05	0.000126788	6.2001e-06	0.000121	4.3264e-06	1.90969e-05	9.6721e-06
33	0.05911	0.05952	0.03084	0.03396	0.0392	0.03977	0.03233	0.02136		0.048	0.055	0.0412	0.0352	0.0314	0.0415	0.0373	0.0196		0.01111	0.00452	-0.01036	-0.00124	0.0078	-0.00173	-0.00497	0.00176		0.000123432	2.04304e-05	0.00010733	1.5376e-06	6.084e-05	2.9929e-06	2.47009e-05	3.0976e-06
33.2	0.05706	0.05987	0.02869	0.03316	0.0393	0.04342	0.03408	0.02596		0.0479	0.0549	0.0407	0.0353	0.0313	0.0414	0.0372	0.0194		0.00916	0.00497	-0.01201	-0.00214	0.008	0.00202	-0.00312	0.00656		8.39056e-05	2.47009e-05	0.00014424	4.5796e-06	6.4e-05	4.0804e-06	9.7344e-06	4.30336e-05
33.4	0.05566	0.05787	0.02819	0.03431	0.0389	0.03677	0.03443	0.02316		0.0477	0.0549	0.0405	0.0351	0.0313	0.0412	0.0372	0.0194		0.00796	0.00297	-0.01231	-0.00079	0.0076	-0.00443	-0.00277	0.00376		6.33616e-05	8.8209e-06	0.000151536	6.241e-07	5.776e-05	1.96249e-05	7.6729e-06	1.41376e-05
33.6	0.05606	0.05802	0.02864	0.02896	0.0377	0.04067	0.03203	0.02311		0.0476	0.0549	0.0407	0.0348	0.0312	0.0409	0.0371	0.0193		0.00846	0.00312	-0.01206	-0.00584	0.0065	-0.00023	-0.00507	0.00381		7.15716e-05	9.7344e-06	0.000145444	3.41056e-05	4.225e-05	5.29e-08	2.57049e-05	1.45161e-05
33.8	0.05616	0.05917	0.02969	0.03311	0.0391	0.03682	0.03008	0.02276		0.0475	0.0546	0.0409	0.0346	0.0309	0.0408	0.0369	0.0193		0.00866	0.00457	-0.01121	-0.00149	0.0082	-0.00398	-0.00682	0.00346		7.49956e-05	2.08849e-05	0.000125664	2.2201e-06	6.724e-05	1.58404e-05	4.65124e-05	1.19716e-05
34	0.05671	0.06047	0.03054	0.03286	0.0429	0.03922	0.03838	0.02316		0.0472	0.0544	0.0408	0.0345	0.0307	0.0408	0.0368	0.0192		0.00951	0.00607	-0.01026	-0.00164	0.0122	-0.00158	0.00158	0.00396		9.04401e-05	3.68449e-05	0.000105268	2.6896e-06	0.00014884	2.4964e-06	2.4964e-06	1.56816e-05
34.2	0.05486	0.05972	0.02864	0.03146	0.0395	0.03892	0.02863	0.02171		0.0471	0.0542	0.0403	0.0345	0.0306	0.0408	0.0366	0.019		0.00776	0.00552	-0.01166	-0.00304	0.0089	-0.00188	-0.00797	0.00271		6.02176e-05	3.04704e-05	0.000135956	9.2416e-06	7.921e-05	3.5344e-06	6.35209e-05	7.3441e-06
34.4	0.05591	0.05852	0.02769	0.03331	0.0366	0.03942	0.03468	0.02446		0.0471	0.0539	0.0399	0.0346	0.0306	0.0408	0.0365	0.0189		0.00881	0.00462	-0.01221	-0.00129	0.006	-0.00138	-0.00182	0.00556		7.76161e-05	2.13444e-05	0.000149084	1.6641e-06	3.6e-05	1.9044e-06	3.3124e-06	3.09136e-05
34.6	0.05341	0.05747	0.02889	0.03051	0.03725	0.04417	0.03183	0.02241		0.0468	0.0537	0.0398	0.0344	0.0306	0.0405	0.0365	0.0189		0.00661	0.00377	-0.01091	-0.00389	0.00665	0.00367	-0.00467	0.00351		4.36921e-05	1.42129e-05	0.000119028	1.51321e-05	4.42225e-05	1.34689e-05	2.18089e-05	1.23201e-05
34.8	0.05356	0.05652	0.02864	0.03361	0.0397	0.03727	0.03123	0.02036		0.0464	0.0533	0.0399	0.0341	0.0305	0.0402	0.0364	0.0189		0.00716	0.00322	-0.01126	-0.00049	0.0092	-0.00293	-0.00517	0.00146		5.12656e-05	1.03684e-05	0.000126788	2.401e-07	8.464e-05	8.5849e-06	2.67289e-05	2.1316e-06
35	0.05476	0.05482	0.02704	0.02651	0.04025	0.03922	0.03588	0.02171		0.0461	0.0529	0.0399	0.0339	0.0303	0.0401	0.0362	0.0189		0.00866	0.00192	-0.01286	-0.00739	0.00995	-0.00088	-0.00032	0.00281		7.49956e-05	3.6864e-06	0.00016538	5.46121e-05	9.90025e-05	7.744e-07	1.024e-07	7.8961e-06
35.2	0.05366	0.05547	0.02954	0.03546	0.0382	0.03662	0.02703	0.02286		0.046	0.0527	0.0397	0.0338	0.0301	0.04	0.036	0.0188		0.00766	0.00277	-0.01016	0.00166	0.0081	-0.00338	-0.00897	0.00406		5.86756e-05	7.6729e-06	0.000103226	2.7556e-06	6.561e-05	1.14244e-05	8.04609e-05	1.64836e-05
35.4	0.05456	0.05482	0.03084	0.03031	0.04155	0.03972	0.03533	0.02326		0.046	0.0527	0.0395	0.0338	0.03	0.04	0.0359	0.0187		0.00856	0.00212	-0.00866	-0.00349	0.01155	-0.00028	-0.00057	0.00456		7.32736e-05	4.4944e-06	7.49956e-05	1.21801e-05	0.000133402	7.84e-08	3.249e-07	2.07936e-05
35.6	0.05421	0.05647	0.03009	0.03031	0.03455	0.03802	0.03248	0.02221		0.0459	0.0524	0.0391	0.0337	0.03	0.0398	0.0358	0.0186		0.00831	0.00407	-0.00901	-0.00339	0.00455	-0.00178	-0.00332	0.00361		6.90561e-05	1.65649e-05	8.11801e-05	1.14921e-05	2.07025e-05	3.1684e-06	1.10224e-05	1.30321e-05
35.8	0.05401	0.05667	0.02969	0.03036	0.0313	0.04117	0.03283	0.01891		0.0455	0.052	0.0388	0.0335	0.0299	0.0396	0.0358	0.0186		0.00851	0.00467	-0.00911	-0.00314	0.0014	0.00157	-0.00297	0.00031		7.24201e-05	2.18089e-05	8.29921e-05	9.8596e-06	1.96e-06	2.4649e-06	8.8209e-06	9.61e-08
36	0.05351	0.05817	0.02669	0.02736	0.0355	0.04097	0.03093	0.02306		0.0451	0.0515	0.0388	0.0333	0.0297	0.0394	0.0357	0.0186		0.00841	0.00667	-0.01211	-0.00594	0.0058	0.00157	-0.00477	0.00446		7.07281e-05	4.44889e-05	0.000146652	3.52836e-05	3.364e-05	2.4649e-06	2.27529e-05	1.98916e-05
36.2	0.05301	0.05837	0.02724	0.03006	0.0365	0.03422	0.03173	0.02161		0.0448	0.0512	0.039	0.0331	0.0295	0.0393	0.0355	0.0185		0.00821	0.00717	-0.01176	-0.00304	0.007	-0.00508	-0.00377	0.00311		6.74041e-05	5.14089e-05	0.000138298	9.2416e-06	4.9e-05	2.58064e-05	1.42129e-05	9.6721e-06
36.4	0.05176	0.05667	0.02779	0.03121	0.03755	0.03602	0.03103	0.02226		0.0444	0.051	0.0389	0.033	0.0294	0.0392	0.0353	0.0184		0.00736	0.00567	-0.01111	-0.00179	0.00815	-0.00318	-0.00427	0.00386		5.41696e-05	3.21489e-05	0.000123432	3.2041e-06	6.64225e-05	1.01124e-05	1.82329e-05	1.48996e-05
36.6	0.05281	0.05737	0.02914	0.03061	0.03965	0.03572	0.03368	0.02046		0.044	0.0505	0.0384	0.033	0.0293	0.039	0.0351	0.0183		0.00881	0.00687	-0.00926	-0.00239	0.01035	-0.00328	-0.00142	0.00216		7.76161e-05	4.71969e-05	8.57476e-05	5.7121e-06	0.000107122	1.07584e-05	2.0164e-06	4.6656e-06
36.8	0.05096	0.05397	0.02829	0.02821	0.0418	0.03792	0.02778	0.02231		0.0436	0.0501	0.0379	0.0329	0.0292	0.0389	0.035	0.0182		0.00736	0.00387	-0.00961	-0.00469	0.0126	-0.00098	-0.00722	0.00411		5.41696e-05	1.49769e-05	9.23521e-05	2.19961e-05	0.00015876	9.604e-07	5.21284e-05	1.68921e-05
37	0.05161	0.05692	0.03119	0.03001	0.04035	0.03852	0.03528	0.02341		0.0433	0.0497	0.0377	0.0326	0.029	0.0386	0.0349	0.0182		0.00831	0.00722	-0.00651	-0.00259	0.01135	-8e-05	0.00038	0.00521		6.90561e-05	5.21284e-05	4.23801e-05	6.7081e-06	0.000128822	6.4e-09	1.444e-07	2.71441e-05
37.2	0.05136	0.05562	0.02674	0.02946	0.03655	0.03967	0.02833	0.02151		0.043	0.0493	0.0376	0.0323	0.0288	0.0383	0.0347	0.0182		0.00836	0.00632	-0.01086	-0.00284	0.00775	0.00137	-0.00637	0.00331		6.98896e-05	3.99424e-05	0.00011794	8.0656e-06	6.00625e-05	1.8769e-06	4.05769e-05	1.09561e-05
37.4	0.05211	0.05352	0.02724	0.02906	0.03165	0.04022	0.03183	0.02061		0.0427	0.0491	0.0376	0.032	0.0285	0.0381	0.0345	0.0181		0.00941	0.00442	-0.01036	-0.00294	0.00315	0.00212	-0.00267	0.00251		8.85481e-05	1.95364e-05	0.00010733	8.6436e-06	9.9225e-06	4.4944e-06	7.1289e-06	6.3001e-06
37.6	0.04886	0.05427	0.02629	0.02926	0.0303	0.03622	0.02833	0.02031		0.0425	0.0489	0.0375	0.0318	0.0283	0.0379	0.0342	0.018		0.00636	0.00537	-0.01121	-0.00254	0.002	-0.00168	-0.00587	0.00231		4.04496e-05	2.88369e-05	0.000125664	6.4516e-06	4e-06	2.8224e-06	3.44569e-05	5.3361e-06
37.8	0.04936	0.05792	0.02549	0.02761	0.03255	0.04397	0.03038	0.02161		0.0424	0.0486	0.0371	0.0317	0.0281	0.0377	0.034	0.0178		0.00696	0.00932	-0.01161	-0.00409	0.00445	0.00627	-0.00362	0.00381		4.84416e-05	8.68624e-05	0.000134792	1.67281e-05	1.98025e-05	3.93129e-05	1.31044e-05	1.45161e-05
38	0.05146	0.05577	0.02839	0.03071	0.0358	0.03782	0.03033	0.01976		0.0423	0.0484	0.0369	0.0316	0.028	0.0376	0.0339	0.0177		0.00916	0.00737	-0.00851	-0.00089	0.0078	0.00022	-0.00357	0.00206		8.39056e-05	5.43169e-05	7.24201e-05	7.921e-07	6.084e-05	4.84e-08	1.27449e-05	4.2436e-06
38.2	0.05051	0.05482	0.02594	0.02916	0.0417	0.03412	0.02743	0.02036		0.042	0.0483	0.0367	0.0314	0.0278	0.0374	0.0338	0.0176		0.00851	0.00652	-0.01076	-0.00224	0.0139	-0.00328	-0.00637	0.00276		7.24201e-05	4.25104e-05	0.000115778	5.0176e-06	0.00019321	1.07584e-05	4.05769e-05	7.6176e-06
38.4	0.04991	0.05397	0.02804	0.03106	0.04155	0.03232	0.03133	0.02236		0.0418	0.0482	0.0366	0.0312	0.0277	0.0372	0.0336	0.0176		0.00811	0.00577	-0.00856	-0.00014	0.01385	-0.00488	-0.00227	0.00476		6.57721e-05	3.32929e-05	7.32736e-05	1.96e-08	0.000191822	2.38144e-05	5.1529e-06	2.26576e-05
38.6	0.05086	0.05632	0.02604	0.02721	0.0383	0.03342	0.03173	0.02486		0.0417	0.0481	0.0366	0.031	0.0275	0.037	0.0334	0.0175		0.00916	0.00822	-0.01056	-0.00379	0.0108	-0.00358	-0.00167	0.00736		8.39056e-05	6.75684e-05	0.000111514	1.43641e-05	0.00011664	1.28164e-05	2.7889e-06	5.41696e-05
38.8	0.04966	0.05182	0.02634	0.03246	0.03655	0.03627	0.02848	0.02376		0.0417	0.0479	0.0365	0.0308	0.0273	0.0369	0.0331	0.0174		0.00796	0.00392	-0.01016	0.00166	0.00925	-0.00063	-0.00462	0.00636		6.33616e-05	1.53664e-05	0.000103226	2.7556e-06	8.55625e-05	3.969e-07	2.13444e-05	4.04496e-05
39	0.04826	0.05702	0.02679	0.02681	0.0349	0.03582	0.02863	0.02281		0.0415	0.0475	0.0364	0.0307	0.0272	0.0368	0.033	0.0173		0.00676	0.00952	-0.00961	-0.00389	0.0077	-0.00098	-0.00437	0.00551		4.56976e-05	9.06304e-05	9.23521e-05	1.51321e-05	5.929e-05	9.604e-07	1.90969e-05	3.03601e-05
39.2	0.05046	0.05842	0.02584	0.02666	0.03575	0.03737	0.03263	0.02151		0.0412	0.0471	0.0361	0.0307	0.0271	0.0367	0.0328	0.0172		0.00926	0.01132	-0.01026	-0.00404	0.00865	0.00067	-0.00017	0.00431		8.57476e-05	0.000128142	0.000105268	1.63216e-05	7.48225e-05	4.489e-07	2.89e-08	1.85761e-05
39.4	0.05321	0.05922	0.02664	0.02796	0.0401	0.03537	0.02783	0.02031		0.041	0.0469	0.0358	0.0306	0.027	0.0366	0.0328	0.0172		0.01221	0.01232	-0.00916	-0.00264	0.0131	-0.00123	-0.00497	0.00311		0.000149084	0.000151782	8.39056e-05	6.9696e-06	0.00017161	1.5129e-06	2.47009e-05	9.6721e-06
39.6	0.04871	0.06377	0.02514	0.02551	0.03565	0.03582	0.02938	0.02126		0.0409	0.0466	0.0357	0.0304	0.0269	0.0364	0.0327	0.0172		0.00781	0.01717	-0.01056	-0.00489	0.00875	-0.00058	-0.00332	0.00406		6.09961e-05	0.000294809	0.000111514	2.39121e-05	7.65625e-05	3.364e-07	1.10224e-05	1.64836e-05
39.8	0.04911	0.05957	0.02679	0.03236	0.037	0.03377	0.02788	0.02091		0.0408	0.0464	0.0357	0.0302	0.0268	0.0362	0.0326	0.0172		0.00831	0.01317	-0.00891	0.00216	0.0102	-0.00243	-0.00472	0.00371		6.90561e-05	0.000173449	7.93881e-05	4.6656e-06	0.00010404	5.9049e-06	2.22784e-05	1.37641e-05
40	0.05041	0.05472	0.02634	0.02646	0.0366	0.03282	0.02713	0.01926		0.0407	0.0462	0.0357	0.03	0.0267	0.036	0.0324	0.0172		0.00971	0.00852	-0.00936	-0.00354	0.0099	-0.00318	-0.00527	0.00206		9.42841e-05	7.25904e-05	8.76096e-05	1.25316e-05	9.801e-05	1.01124e-05	2.77729e-05	4.2436e-06
40.2	0.04881	0.05652	0.02629	0.02731	0.0347	0.04232	0.02643	0.02076		0.0406	0.046	0.0354	0.0299	0.0265	0.0359	0.0322	0.0171		0.00821	0.01052	-0.00911	-0.00259	0.0082	0.00642	-0.00577	0.00366		6.74041e-05	0.00011067	8.29921e-05	6.7081e-06	6.724e-05	4.12164e-05	3.32929e-05	1.33956e-05
40.4	0.04841	0.05487	0.02774	0.02831	0.03295	0.03822	0.02903	0.02131		0.0406	0.046	0.0352	0.0299	0.0264	0.0358	0.0321	0.017		0.00781	0.00887	-0.00746	-0.00159	0.00655	0.00242	-0.00307	0.00431		6.09961e-05	7.86769e-05	5.56516e-05	2.5281e-06	4.29025e-05	5.8564e-06	9.4249e-06	1.85761e-05
40.6	0.04766	0.05667	0.02789	0.02756	0.0367	0.03607	0.02778	0.02241		0.0405	0.0458	0.035	0.0298	0.0263	0.0357	0.032	0.0169		0.00716	0.01087	-0.00711	-0.00224	0.0104	0.00037	-0.00422	0.00551		5.12656e-05	0.000118157	5.05521e-05	5.0176e-06	0.00010816	1.369e-07	1.78084e-05	3.03601e-05
40.8	0.04721	0.06067	0.02794	0.03046	0.0309	0.03502	0.02973	0.02001		0.0404	0.0457	0.035	0.0297	0.0263	0.0355	0.0319	0.0169		0.00681	0.01497	-0.00706	0.00076	0.0046	-0.00048	-0.00217	0.00311		4.63761e-05	0.000224101	4.98436e-05	5.776e-07	2.116e-05	2.304e-07	4.7089e-06	9.6721e-06
41	0.04751	0.05772	0.02654	0.02591	0.03615	0.03672	0.02633	0.02281		0.0402	0.0453	0.0349	0.0296	0.0262	0.0354	0.0318	0.0169		0.00731	0.01242	-0.00836	-0.00369	0.00995	0.00132	-0.00547	0.00591		5.34361e-05	0.000154256	6.98896e-05	1.36161e-05	9.90025e-05	1.7424e-06	2.99209e-05	3.49281e-05
41.2	0.04621	0.05632	0.02804	0.03086	0.0345	0.03347	0.02623	0.02276		0.0399	0.045	0.0349	0.0295	0.0262	0.0354	0.0317	0.0169		0.00631	0.01132	-0.00686	0.00136	0.0083	-0.00193	-0.00547	0.00586		3.98161e-05	0.000128142	4.70596e-05	1.8496e-06	6.889e-05	3.7249e-06	2.99209e-05	3.43396e-05
41.4	0.04901	0.05722	0.02584	0.02681	0.03525	0.03517	0.03278	0.02186		0.0396	0.0447	0.0348	0.0294	0.0261	0.0353	0.0316	0.0169		0.00941	0.01252	-0.00896	-0.00259	0.00915	-0.00013	0.00118	0.00496		8.85481e-05	0.00015675	8.02816e-05	6.7081e-06	8.37225e-05	1.69e-08	1.3924e-06	2.46016e-05
41.6	0.04616	0.05732	0.03019	0.02941	0.037	0.03737	0.02398	0.01911		0.0392	0.0443	0.0347	0.0293	0.026	0.0352	0.0315	0.0169		0.00696	0.01302	-0.00451	0.00011	0.011	0.00217	-0.00752	0.00221		4.84416e-05	0.00016952	2.03401e-05	1.21e-08	0.000121	4.7089e-06	5.65504e-05	4.8841e-06
41.8	0.04751	0.05757	0.02759	0.02486	0.0409	0.03592	0.03008	0.02216		0.0388	0.0439	0.0344	0.0292	0.0259	0.0351	0.0314	0.0168		0.00871	0.01367	-0.00681	-0.00434	0.015	0.00082	-0.00132	0.00536		7.58641e-05	0.000186869	4.63761e-05	1.88356e-05	0.000225	6.724e-07	1.7424e-06	2.87296e-05
42	0.04651	0.05722	0.02664	0.02466	0.0368	0.03602	0.02663	0.02251		0.0385	0.0436	0.0341	0.0291	0.0258	0.0349	0.0313	0.0168		0.00801	0.01362	-0.00746	-0.00444	0.011	0.00112	-0.00467	0.00571		6.41601e-05	0.000185504	5.56516e-05	1.97136e-05	0.000121	1.2544e-06	2.18089e-05	3.26041e-05
42.2	0.04701	0.05592	0.02599	0.02581	0.0363	0.03312	0.03088	0.02486		0.0382	0.0434	0.0338	0.0289	0.0257	0.0347	0.0312	0.017		0.00881	0.01252	-0.00781	-0.00309	0.0106	-0.00158	-0.00032	0.00786		7.76161e-05	0.00015675	6.09961e-05	9.5481e-06	0.00011236	2.4964e-06	1.024e-07	6.17796e-05
42.4	0.04481	0.05592	0.02489	0.02851	0.03995	0.03222	0.02598	0.02061		0.038	0.0433	0.0337	0.0287	0.0255	0.0345	0.0311	0.0171		0.00681	0.01262	-0.00881	-0.00019	0.01445	-0.00228	-0.00512	0.00351		4.63761e-05	0.000159264	7.76161e-05	3.61e-08	0.000208803	5.1984e-06	2.62144e-05	1.23201e-05
42.6	0.04421	0.05387	0.02749	0.02531	0.0327	0.03582	0.02778	0.02011		0.038	0.0434	0.0337	0.0285	0.0253	0.0343	0.0309	0.0172		0.00621	0.01047	-0.00621	-0.00319	0.0074	0.00152	-0.00312	0.00291		3.85641e-05	0.000109621	3.85641e-05	1.01761e-05	5.476e-05	2.3104e-06	9.7344e-06	8.4681e-06
42.8	0.04621	0.05542	0.02629	0.02531	0.03665	0.03572	0.02648	0.01981		0.0381	0.0434	0.0337	0.0283	0.0251	0.0341	0.0307	0.0173		0.00811	0.01202	-0.00741	-0.00299	0.01155	0.00162	-0.00422	0.00251		6.57721e-05	0.00014448	5.49081e-05	8.9401e-06	0.000133403	2.6244e-06	1.78084e-05	6.3001e-06
43	0.04456	0.05572	0.02804	0.02791	0.0339	0.03392	0.02718	0.01891		0.038	0.0432	0.0336	0.0282	0.025	0.0339	0.0305	0.0173		0.00656	0.01252	-0.00556	-0.00029	0.0089	2e-05	-0.00332	0.00161		4.30336e-05	0.00015675	3.09136e-05	8.41e-08	7.921e-05	4e-10	1.10224e-05	2.5921e-06
43.2	0.04536	0.05662	0.02909	0.02731	0.034	0.03707	0.02763	0.02031		0.0378	0.0429	0.0335	0.0281	0.0248	0.0339	0.0303	0.0173		0.00756	0.01372	-0.00441	-0.00079	0.0092	0.00317	-0.00267	0.00301		5.71536e-05	0.000188238	1.94481e-05	6.241e-07	8.464e-05	1.00489e-05	7.1289e-06	9.0601e-06
43.4	0.04536	0.05717	0.02584	0.02271	0.03775	0.03212	0.02333	0.01926		0.0376	0.0425	0.0333	0.0281	0.0247	0.0338	0.0302	0.0173		0.00776	0.01467	-0.00746	-0.00539	0.01305	-0.00168	-0.00687	0.00196		6.02176e-05	0.000215209	5.56516e-05	2.90521e-05	0.000170302	2.8224e-06	4.71969e-05	3.8416e-06
43.6	0.04526	0.05107	0.02519	0.02486	0.03545	0.03772	0.02873	0.02021		0.0372	0.0419	0.0332	0.0281	0.0246	0.0338	0.0301	0.0173		0.00806	0.00917	-0.00801	-0.00324	0.01085	0.00392	-0.00137	0.00291		6.49636e-05	8.40889e-05	6.41601e-05	1.04976e-05	0.000117723	1.53664e-05	1.8769e-06	8.4681e-06
43.8	0.04491	0.05017	0.02444	0.02501	0.03235	0.03412	0.02478	0.02171		0.0367	0.0412	0.033	0.028	0.0246	0.0337	0.0301	0.0173		0.00821	0.00897	-0.00856	-0.00299	0.00775	0.00042	-0.00532	0.00441		6.74041e-05	8.04609e-05	7.32736e-05	8.9401e-06	6.00625e-05	1.764e-07	2.83024e-05	1.94481e-05
44	0.04366	0.05042	0.02784	0.02721	0.03295	0.03297	0.02868	0.02026		0.0361	0.0406	0.0327	0.0277	0.0246	0.0336	0.03	0.0171		0.00756	0.00982	-0.00486	-0.00049	0.00835	-0.00063	-0.00132	0.00316		5.71536e-05	9.64324e-05	2.36196e-05	2.401e-07	6.97225e-05	3.969e-07	1.7424e-06	9.9856e-06
44.2	0.04346	0.05117	0.02584	0.02486	0.02755	0.03732	0.02468	0.01836		0.0356	0.0402	0.0324	0.0275	0.0244	0.0334	0.0299	0.0168		0.00786	0.01097	-0.00656	-0.00264	0.00315	0.00392	-0.00522	0.00156		6.17796e-05	0.000120341	4.30336e-05	6.9696e-06	9.9225e-06	1.53664e-05	2.72484e-05	2.4336e-06
44.4	0.04191	0.04917	0.02734	0.02271	0.03405	0.03962	0.02978	0.02006		0.0353	0.04	0.0321	0.0273	0.0242	0.0331	0.0297	0.0166		0.00661	0.00917	-0.00476	-0.00459	0.00985	0.00652	8e-05	0.00346		4.36921e-05	8.40889e-05	2.26576e-05	2.10681e-05	9.70225e-05	4.25104e-05	6.4e-09	1.19716e-05
44.6	0.04236	0.05162	0.02814	0.02316	0.0322	0.03412	0.02638	0.01831		0.0352	0.0399	0.0319	0.027	0.024	0.0328	0.0296	0.0164		0.00716	0.01172	-0.00376	-0.00384	0.0082	0.00132	-0.00322	0.00191		5.12656e-05	0.000137358	1.41376e-05	1.47456e-05	6.724e-05	1.7424e-06	1.03684e-05	3.6481e-06
44.8	0.04181	0.05282	0.02499	0.02526	0.02795	0.03042	0.02383	0.02191		0.0352	0.0398	0.0317	0.0268	0.0238	0.0324	0.0293	0.0162		0.00661	0.01302	-0.00671	-0.00154	0.00415	-0.00198	-0.00547	0.00571		4.36921e-05	0.00016952	4.50241e-05	2.3716e-06	1.72225e-05	3.9204e-06	2.99209e-05	3.26041e-05
45	0.04161	0.05257	0.02919	0.02811	0.02945	0.02867	0.02663	0.02076		0.0351	0.0396	0.0315	0.0266	0.0236	0.0322	0.0291	0.0162		0.00651	0.01297	-0.00231	0.00151	0.00585	-0.00353	-0.00247	0.00456		4.23801e-05	0.000168221	5.3361e-06	2.2801e-06	3.42225e-05	1.24609e-05	6.1009e-06	2.07936e-05
45.2	0.04136	0.05282	0.02564	0.02381	0.0282	0.03562	0.02343	0.01986		0.0351	0.0393	0.0314	0.0264	0.0234	0.032	0.0288	0.0161		0.00626	0.01352	-0.00576	-0.00259	0.0048	0.00362	-0.00537	0.00376		3.91876e-05	0.00018279	3.31776e-05	6.7081e-06	2.304e-05	1.31044e-05	2.88369e-05	1.41376e-05
45.4	0.04201	0.04907	0.02679	0.02286	0.03055	0.04152	0.02708	0.01881		0.0349	0.0389	0.0314	0.0263	0.0232	0.0319	0.0286	0.0159		0.00711	0.01017	-0.00461	-0.00344	0.00735	0.00962	-0.00152	0.00291		5.05521e-05	0.000103429	2.12521e-05	1.18336e-05	5.40225e-05	9.25444e-05	2.3104e-06	8.4681e-06
45.6	0.04096	0.04657	0.02409	0.02346	0.0317	0.03157	0.02508	0.01861		0.0346	0.0385	0.0313	0.0263	0.0231	0.0318	0.0285	0.0158		0.00636	0.00807	-0.00721	-0.00284	0.0086	-0.00023	-0.00342	0.00281		4.04496e-05	6.51249e-05	5.19841e-05	8.0656e-06	7.396e-05	5.29e-08	1.16964e-05	7.8961e-06
45.8	0.04031	0.04622	0.02449	0.02336	0.0264	0.03337	0.02783	0.02041		0.0342	0.0383	0.0313	0.0262	0.023	0.0317	0.0284	0.0157		0.00611	0.00792	-0.00681	-0.00284	0.0034	0.00167	-0.00057	0.00471		3.73321e-05	6.27264e-05	4.63761e-05	8.0656e-06	1.156e-05	2.7889e-06	3.249e-07	2.21841e-05
46	0.04161	0.04652	0.02734	0.02401	0.0329	0.03302	0.02508	0.01961		0.0339	0.0383	0.0311	0.026	0.0229	0.0316	0.0283	0.0158		0.00771	0.00822	-0.00376	-0.00199	0.01	0.00142	-0.00322	0.00381		5.94441e-05	6.75684e-05	1.41376e-05	3.9601e-06	0.0001	2.0164e-06	1.03684e-05	1.45161e-05
46.2	0.03976	0.04447	0.02319	0.02661	0.02725	0.03247	0.02528	0.02046		0.0337	0.0384	0.0309	0.0259	0.0228	0.0314	0.0282	0.0158		0.00606	0.00607	-0.00771	0.00071	0.00445	0.00107	-0.00292	0.00466		3.67236e-05	3.68449e-05	5.94441e-05	5.041e-07	1.98025e-05	1.1449e-06	8.5264e-06	2.17156e-05
46.4	0.04046	0.04407	0.02594	0.02486	0.02425	0.03172	0.02133	0.01751		0.0336	0.0385	0.0307	0.0257	0.0226	0.0312	0.028	0.0158		0.00686	0.00557	-0.00476	-0.00084	0.00165	0.00052	-0.00667	0.00171		4.70596e-05	3.10249e-05	2.26576e-05	7.056e-07	2.7225e-06	2.704e-07	4.44889e-05	2.9241e-06
46.6	0.04031	0.04572	0.02469	0.02251	0.02345	0.02942	0.02243	0.01851		0.0335	0.0385	0.0306	0.0255	0.0224	0.031	0.0279	0.0158		0.00681	0.00722	-0.00591	-0.00299	0.00105	-0.00158	-0.00547	0.00271		4.63761e-05	5.21284e-05	3.49281e-05	8.9401e-06	1.1025e-06	2.4964e-06	2.99209e-05	7.3441e-06
46.8	0.03886	0.04892	0.02339	0.02041	0.02365	0.03222	0.02438	0.01886		0.0335	0.0384	0.0304	0.0252	0.0222	0.0309	0.0276	0.0158		0.00536	0.01052	-0.00701	-0.00479	0.00145	0.00132	-0.00322	0.00306		2.87296e-05	0.00011067	4.91401e-05	2.29441e-05	2.1025e-06	1.7424e-06	1.03684e-05	9.3636e-06
47	0.04021	0.05087	0.02499	0.02331	0.02395	0.03592	0.02588	0.01876		0.0335	0.0382	0.0303	0.0251	0.0221	0.0308	0.0274	0.0157		0.00671	0.01267	-0.00531	-0.00179	0.00185	0.00512	-0.00152	0.00306		4.50241e-05	0.000160529	2.81961e-05	3.2041e-06	3.4225e-06	2.62144e-05	2.3104e-06	9.3636e-06
47.2	0.03741	0.04967	0.02414	0.02286	0.0246	0.03402	0.02273	0.01721		0.0335	0.0379	0.0302	0.025	0.022	0.0307	0.0273	0.0156		0.00391	0.01177	-0.00606	-0.00214	0.0026	0.00332	-0.00457	0.00161		1.52881e-05	0.000138533	3.67236e-05	4.5796e-06	6.76e-06	1.10224e-05	2.08849e-05	2.5921e-06
47.4	0.03836	0.05062	0.02554	0.02086	0.0278	0.03767	0.02628	0.01881		0.0334	0.0377	0.0302	0.025	0.0219	0.0307	0.0272	0.0155		0.00496	0.01292	-0.00466	-0.00414	0.0059	0.00697	-0.00092	0.00331		2.46016e-05	0.000166926	2.17156e-05	1.71396e-05	3.481e-05	4.85809e-05	8.464e-07	1.09561e-05
47.6	0.03766	0.04887	0.02409	0.02411	0.02765	0.03007	0.02233	0.02046		0.0334	0.0373	0.0301	0.0249	0.0219	0.0306	0.0271	0.0154		0.00426	0.01157	-0.00601	-0.00079	0.00575	-0.00053	-0.00477	0.00506		1.81476e-05	0.000133865	3.61201e-05	6.241e-07	3.30625e-05	2.809e-07	2.27529e-05	2.56036e-05
47.8	0.03826	0.04922	0.02369	0.02421	0.0294	0.02872	0.02458	0.01966		0.0332	0.0371	0.03	0.0249	0.0218	0.0305	0.0271	0.0154		0.00506	0.01212	-0.00631	-0.00069	0.0076	-0.00178	-0.00252	0.00426		2.56036e-05	0.000146894	3.98161e-05	4.761e-07	5.776e-05	3.1684e-06	6.3504e-06	1.81476e-05
48	0.03711	0.04702	0.02474	0.02286	0.02785	0.02937	0.02208	0.02026		0.033	0.037	0.0298	0.0248	0.0217	0.0303	0.027	0.0154		0.00411	0.01002	-0.00506	-0.00194	0.00615	-0.00093	-0.00492	0.00486		1.68921e-05	0.0001004	2.56036e-05	3.7636e-06	3.78225e-05	8.649e-07	2.42064e-05	2.36196e-05
48.2	0.03721	0.04657	0.02329	0.02546	0.027	0.03257	0.02243	0.01916		0.0329	0.037	0.0297	0.0246	0.0216	0.0302	0.0269	0.0153		0.00431	0.00957	-0.00641	0.00086	0.0054	0.00237	-0.00447	0.00386		1.85761e-05	9.15849e-05	4.10881e-05	7.396e-07	2.916e-05	5.6169e-06	1.99809e-05	1.48996e-05
48.4	0.03751	0.04737	0.02439	0.02136	0.02365	0.03802	0.02418	0.01816		0.0328	0.0368	0.0296	0.0245	0.0215	0.0301	0.0268	0.0152		0.00471	0.01057	-0.00521	-0.00314	0.00215	0.00792	-0.00262	0.00296		2.21841e-05	0.000111725	2.71441e-05	9.8596e-06	4.6225e-06	6.27264e-05	6.8644e-06	8.7616e-06
48.6	0.03706	0.04752	0.02354	0.02216	0.02495	0.03542	0.02368	0.01846		0.0326	0.0366	0.0295	0.0244	0.0214	0.0299	0.0266	0.0152		0.00446	0.01092	-0.00596	-0.00224	0.00355	0.00552	-0.00292	0.00326		1.98916e-05	0.000119246	3.55216e-05	5.0176e-06	1.26025e-05	3.04704e-05	8.5264e-06	1.06276e-05
48.8	0.03841	0.04902	0.02329	0.02116	0.02645	0.03912	0.02313	0.01886		0.0326	0.0365	0.0293	0.0243	0.0214	0.0299	0.0265	0.0151		0.00581	0.01252	-0.00601	-0.00314	0.00505	0.00922	-0.00337	0.00376		3.37561e-05	0.00015675	3.61201e-05	9.8596e-06	2.55025e-05	8.50084e-05	1.13569e-05	1.41376e-05
49	0.03731	0.04612	0.02369	0.02061	0.02715	0.03087	0.02403	0.01941		0.0325	0.0365	0.0292	0.0243	0.0213	0.0298	0.0264	0.0151		0.00481	0.00962	-0.00551	-0.00369	0.00585	0.00107	-0.00237	0.00431		2.31361e-05	9.25444e-05	3.03601e-05	1.36161e-05	3.42225e-05	1.1449e-06	5.6169e-06	1.85761e-05
49.2	0.03846	0.04617	0.02259	0.02056	0.0237	0.02712	0.02313	0.01986		0.0326	0.0364	0.0292	0.0242	0.0213	0.0297	0.0264	0.0151		0.00586	0.00977	-0.00661	-0.00364	0.0024	-0.00258	-0.00327	0.00476		3.43396e-05	9.54529e-05	4.36921e-05	1.32496e-05	5.76e-06	6.6564e-06	1.06929e-05	2.26576e-05
49.4	0.03706	0.04487	0.02399	0.02216	0.02135	0.02922	0.02418	0.01976		0.0325	0.0362	0.0291	0.0241	0.0212	0.0296	0.0263	0.0151		0.00456	0.00867	-0.00511	-0.00194	0.00015	-0.00038	-0.00212	0.00466		2.07936e-05	7.51689e-05	2.61121e-05	3.7636e-06	2.25e-08	1.444e-07	4.4944e-06	2.17156e-05
49.6	0.03711	0.04442	0.02314	0.02036	0.0226	0.02827	0.02128	0.01631		0.0323	0.0361	0.0291	0.024	0.0211	0.0295	0.0263	0.0151		0.00481	0.00832	-0.00596	-0.00364	0.0015	-0.00123	-0.00502	0.00121		2.31361e-05	6.92224e-05	3.55216e-05	1.32496e-05	2.25e-06	1.5129e-06	2.52004e-05	1.4641e-06
49.8	0.03671	0.04532	0.02229	0.02226	0.02245	0.03147	0.02123	0.01711		0.0322	0.036	0.029	0.0239	0.021	0.0294	0.0262	0.015		0.00451	0.00932	-0.00671	-0.00164	0.00145	0.00207	-0.00497	0.00211		2.03401e-05	8.68624e-05	4.50241e-05	2.6896e-06	2.1025e-06	4.2849e-06	2.47009e-05	4.4521e-06
50	0.03686	0.04547	0.02319	0.02141	0.02015	0.02962	0.02373	0.01796		0.0321	0.0359	0.029	0.0239	0.021	0.0294	0.0261	0.015		0.00476	0.00957	-0.00581	-0.00249	-0.00085	0.00022	-0.00237	0.00296		2.26576e-05	9.15849e-05	3.37561e-05	6.2001e-06	7.225e-07	4.84e-08	5.6169e-06	8.7616e-06
50.2	0.03636	0.04502	0.02194	0.02051	0.0208	0.03052	0.02278	0.01791		0.0319	0.0358	0.0289	0.0238	0.0209	0.0293	0.026	0.0149		0.00446	0.00922	-0.00696	-0.00329	-0.0001	0.00122	-0.00322	0.00301		1.98916e-05	8.50084e-05	4.84416e-05	1.08241e-05	1e-08	1.4884e-06	1.03684e-05	9.0601e-06
50.4	0.03666	0.04512	0.02359	0.02121	0.02165	0.03057	0.02173	0.01796		0.0318	0.0358	0.0288	0.0238	0.0209	0.0292	0.0259	0.0149		0.00486	0.00932	-0.00521	-0.00259	0.00075	0.00137	-0.00417	0.00306		2.36196e-05	8.68624e-05	2.71441e-05	6.7081e-06	5.625e-07	1.8769e-06	1.73889e-05	9.3636e-06
50.6	0.03656	0.04597	0.02259	0.02006	0.021	0.02977	0.02353	0.01736		0.0318	0.0361	0.0288	0.0237	0.0209	0.0291	0.0258	0.015		0.00476	0.00987	-0.00621	-0.00364	0.0001	0.00067	-0.00227	0.00236		2.26576e-05	9.74169e-05	3.85641e-05	1.32496e-05	1e-08	4.489e-07	5.1529e-06	5.5696e-06
50.8	0.03591	0.04742	0.02209	0.02186	0.0216	0.03182	0.02178	0.01991		0.0318	0.0364	0.0287	0.0236	0.0208	0.0291	0.0257	0.0151		0.00411	0.01102	-0.00661	-0.00174	0.0008	0.00272	-0.00392	0.00481		1.68921e-05	0.00012144	4.36921e-05	3.0276e-06	6.4e-07	7.3984e-06	1.53664e-05	2.31361e-05
51	0.03661	0.04502	0.02324	0.02086	0.02245	0.03152	0.01913	0.01971		0.0319	0.0368	0.0287	0.0235	0.0207	0.029	0.0257	0.0151		0.00471	0.00822	-0.00546	-0.00264	0.00175	0.00252	-0.00657	0.00461		2.21841e-05	6.75684e-05	2.98116e-05	6.9696e-06	3.0625e-06	6.3504e-06	4.31649e-05	2.12521e-05
51.2	0.03691	0.04547	0.02159	0.01971	0.02135	0.02647	0.02303	0.02031		0.032	0.0368	0.0288	0.0234	0.0206	0.0289	0.0256	0.0151		0.00491	0.00867	-0.00721	-0.00369	0.00075	-0.00243	-0.00257	0.00521		2.41081e-05	7.51689e-05	5.19841e-05	1.36161e-05	5.625e-07	5.9049e-06	6.6049e-06	2.71441e-05
51.4	0.03546	0.04557	0.02244	0.02181	0.02205	0.02972	0.02193	0.02046		0.0321	0.0367	0.0288	0.0234	0.0205	0.0289	0.0255	0.0151		0.00336	0.00887	-0.00636	-0.00159	0.00155	0.00082	-0.00357	0.00536		1.12896e-05	7.86769e-05	4.04496e-05	2.5281e-06	2.4025e-06	6.724e-07	1.27449e-05	2.87296e-05
51.6	0.03576	0.04642	0.02404	0.02146	0.02235	0.02922	0.02388	0.01896		0.0321	0.0366	0.0288	0.0234	0.0204	0.029	0.0255	0.015		0.00366	0.00982	-0.00476	-0.00194	0.00195	0.00022	-0.00162	0.00396		1.33956e-05	9.64324e-05	2.26576e-05	3.7636e-06	3.8025e-06	4.84e-08	2.6244e-06	1.56816e-05
51.8	0.03586	0.04797	0.02289	0.02006	0.02185	0.02937	0.02093	0.01836		0.0321	0.0364	0.0287	0.0234	0.0204	0.0291	0.0254	0.015		0.00376	0.01157	-0.00581	-0.00334	0.00145	0.00027	-0.00447	0.00336		1.41376e-05	0.000133865	3.37561e-05	1.11556e-05	2.1025e-06	7.29e-08	1.99809e-05	1.12896e-05
52	0.03501	0.04752	0.02319	0.02046	0.0208	0.02997	0.02158	0.01981		0.0321	0.0363	0.0286	0.0235	0.0205	0.0291	0.0255	0.0149		0.00291	0.01122	-0.00541	-0.00304	0.0003	0.00087	-0.00392	0.00491		8.4681e-06	0.000125888	2.92681e-05	9.2416e-06	9e-08	7.569e-07	1.53664e-05	2.41081e-05
52.2	0.03546	0.04912	0.02194	0.02091	0.02045	0.03017	0.02178	0.01926		0.032	0.0363	0.0286	0.0235	0.0205	0.0291	0.0255	0.015		0.00346	0.01282	-0.00666	-0.00259	-5e-05	0.00107	-0.00372	0.00426		1.19716e-05	0.000164352	4.43556e-05	6.7081e-06	2.5e-09	1.1449e-06	1.38384e-05	1.81476e-05
52.4	0.03521	0.04737	0.02169	0.01841	0.0239	0.02692	0.02103	0.01861		0.0321	0.0364	0.0285	0.0234	0.0205	0.029	0.0255	0.015		0.00311	0.01097	-0.00681	-0.00499	0.0034	-0.00208	-0.00447	0.00361		9.6721e-06	0.000120341	4.63761e-05	2.49001e-05	1.156e-05	4.3264e-06	1.99809e-05	1.30321e-05
52.6	0.03626	0.04582	0.02124	0.02091	0.02195	0.02807	0.02208	0.01851		0.0322	0.0367	0.0285	0.0233	0.0205	0.0289	0.0255	0.0151		0.00406	0.00912	-0.00726	-0.00239	0.00145	-0.00083	-0.00342	0.00341		1.64836e-05	8.31744e-05	5.27076e-05	5.7121e-06	2.1025e-06	6.889e-07	1.16964e-05	1.16281e-05
52.8	0.03581	0.04652	0.02089	0.01956	0.0249	0.02677	0.01973	0.01776		0.0323	0.037	0.0285	0.0233	0.0204	0.0289	0.0254	0.0151		0.00351	0.00952	-0.00761	-0.00374	0.0045	-0.00213	-0.00567	0.00266		1.23201e-05	9.06304e-05	5.79121e-05	1.39876e-05	2.025e-05	4.5369e-06	3.21489e-05	7.0756e-06
53	0.03491	0.04637	0.02209	0.02011	0.02285	0.02792	0.02118	0.01771		0.0325	0.0373	0.0286	0.0232	0.0204	0.0289	0.0254	0.015		0.00241	0.00907	-0.00651	-0.00309	0.00245	-0.00098	-0.00422	0.00271		5.8081e-06	8.22649e-05	4.23801e-05	9.5481e-06	6.0025e-06	9.604e-07	1.78084e-05	7.3441e-06
53.2	0.03616	0.04622	0.02224	0.02271	0.02095	0.02667	0.02258	0.01946		0.0327	0.0375	0.0287	0.0232	0.0204	0.0289	0.0253	0.0149		0.00346	0.00872	-0.00646	-0.00049	0.00055	-0.00223	-0.00272	0.00456		1.19716e-05	7.60384e-05	4.17316e-05	2.401e-07	3.025e-07	4.9729e-06	7.3984e-06	2.07936e-05
53.4	0.03596	0.04532	0.02189	0.01976	0.0215	0.03032	0.02058	0.01801		0.0329	0.0377	0.0287	0.0233	0.0204	0.029	0.0253	0.0149		0.00306	0.00762	-0.00681	-0.00354	0.0011	0.00132	-0.00472	0.00311		9.3636e-06	5.80644e-05	4.63761e-05	1.25316e-05	1.21e-06	1.7424e-06	2.22784e-05	9.6721e-06
53.6	0.03526	0.04432	0.02264	0.02166	0.0201	0.02722	0.02048	0.01836		0.0331	0.0379	0.0287	0.0235	0.0204	0.0291	0.0253	0.0149		0.00216	0.00642	-0.00606	-0.00184	-0.0003	-0.00188	-0.00482	0.00346		4.6656e-06	4.12164e-05	3.67236e-05	3.3856e-06	9e-08	3.5344e-06	2.32324e-05	1.19716e-05
53.8	0.03596	0.04552	0.02119	0.01961	0.02185	0.02632	0.01963	0.01791		0.0332	0.038	0.0288	0.0236	0.0205	0.0292	0.0254	0.0149		0.00276	0.00752	-0.00761	-0.00399	0.00135	-0.00288	-0.00577	0.00301		7.6176e-06	5.65504e-05	5.79121e-05	1.59201e-05	1.8225e-06	8.2944e-06	3.32929e-05	9.0601e-06
54	0.03601	0.05037	0.02269	0.02031	0.02175	0.03027	0.02013	0.01831		0.0333	0.0381	0.029	0.0236	0.0206	0.0293	0.0255	0.0149		0.00271	0.01227	-0.00631	-0.00329	0.00115	0.00097	-0.00537	0.00341		7.3441e-06	0.000150553	3.98161e-05	1.08241e-05	1.3225e-06	9.409e-07	2.88369e-05	1.16281e-05
54.2	0.03571	0.05132	0.02109	0.01976	0.02105	0.02817	0.02393	0.01761		0.0333	0.0382	0.029	0.0236	0.0207	0.0293	0.0255	0.015		0.00241	0.01312	-0.00791	-0.00384	0.00035	-0.00113	-0.00157	0.00261		5.8081e-06	0.000172134	6.25681e-05	1.47456e-05	1.225e-07	1.2769e-06	2.4649e-06	6.8121e-06
54.4	0.03571	0.04842	0.02294	0.01841	0.02065	0.02882	0.02193	0.01706		0.0333	0.0381	0.0291	0.0236	0.0207	0.0294	0.0256	0.015		0.00241	0.01032	-0.00616	-0.00519	-5e-05	-0.00058	-0.00367	0.00206		5.8081e-06	0.000106502	3.79456e-05	2.69361e-05	2.5e-09	3.364e-07	1.34689e-05	4.2436e-06
54.6	0.03586	0.04687	0.02224	0.02096	0.02415	0.02652	0.02043	0.01916		0.0332	0.0379	0.0291	0.0237	0.0207	0.0295	0.0256	0.015		0.00266	0.00897	-0.00686	-0.00274	0.00345	-0.00298	-0.00517	0.00416		7.0756e-06	8.04609e-05	4.70596e-05	7.5076e-06	1.19025e-05	8.8804e-06	2.67289e-05	1.73056e-05
54.8	0.03601	0.04767	0.02249	0.01971	0.02225	0.02717	0.01953	0.01826		0.033	0.0376	0.029	0.0237	0.0208	0.0296	0.0257	0.015		0.00301	0.01007	-0.00651	-0.00399	0.00145	-0.00243	-0.00617	0.00326		9.0601e-06	0.000101405	4.23801e-05	1.59201e-05	2.1025e-06	5.9049e-06	3.80689e-05	1.06276e-05
55	0.03636	0.04847	0.02299	0.02111	0.02325	0.02857	0.02188	0.01886		0.0329	0.0374	0.0289	0.0238	0.0209	0.0296	0.0257	0.015		0.00346	0.01107	-0.00591	-0.00269	0.00235	-0.00103	-0.00382	0.00386		1.19716e-05	0.000122545	3.49281e-05	7.2361e-06	5.5225e-06	1.0609e-06	1.45924e-05	1.48996e-05
55.2	0.03616	0.04622	0.02219	0.01991	0.02325	0.02592	0.02133	0.01796		0.0329	0.0377	0.0287	0.0238	0.0209	0.0296	0.0258	0.015		0.00326	0.00852	-0.00651	-0.00389	0.00235	-0.00368	-0.00447	0.00296		1.06276e-05	7.25904e-05	4.23801e-05	1.51321e-05	5.5225e-06	1.35424e-05	1.99809e-05	8.7616e-06
55.4	0.03626	0.04712	0.02194	0.01901	0.0199	0.02647	0.02123	0.01846		0.0331	0.0381	0.0287	0.0238	0.0209	0.0296	0.0258	0.0151		0.00316	0.00902	-0.00676	-0.00479	-0.001	-0.00313	-0.00457	0.00336		9.9856e-06	8.13604e-05	4.56976e-05	2.29441e-05	1e-06	9.7969e-06	2.08849e-05	1.12896e-05
55.6	0.03731	0.04512	0.02279	0.02096	0.0204	0.02722	0.02013	0.01846		0.0334	0.0387	0.0289	0.0237	0.021	0.0295	0.0258	0.0151		0.00391	0.00642	-0.00611	-0.00274	-0.0006	-0.00228	-0.00567	0.00336		1.52881e-05	4.12164e-05	3.73321e-05	7.5076e-06	3.6e-07	5.1984e-06	3.21489e-05	1.12896e-05
55.8	0.03621	0.04492	0.02229	0.01806	0.02325	0.02602	0.02173	0.01631		0.0337	0.0392	0.029	0.0236	0.0209	0.0294	0.0258	0.0151		0.00251	0.00572	-0.00671	-0.00554	0.00235	-0.00338	-0.00407	0.00121		6.3001e-06	3.27184e-05	4.50241e-05	3.06916e-05	5.5225e-06	1.14244e-05	1.65649e-05	1.4641e-06
56	0.03706	0.04412	0.02384	0.02036	0.0261	0.02717	0.02098	0.01781		0.0341	0.0395	0.0292	0.0237	0.0208	0.0294	0.0258	0.015		0.00296	0.00462	-0.00536	-0.00334	0.0053	-0.00223	-0.00482	0.00281		8.7616e-06	2.13444e-05	2.87296e-05	1.11556e-05	2.809e-05	4.9729e-06	2.32324e-05	7.8961e-06
56.2	0.03696	0.04302	0.02194	0.01836	0.02205	0.02522	0.02338	0.01986		0.0343	0.0396	0.0294	0.0238	0.0207	0.0296	0.0257	0.015		0.00266	0.00342	-0.00746	-0.00544	0.00135	-0.00438	-0.00232	0.00486		7.0756e-06	1.16964e-05	5.56516e-05	2.95936e-05	1.8225e-06	1.91844e-05	5.3824e-06	2.36196e-05
56.4	0.03666	0.04482	0.02439	0.02156	0.02175	0.02527	0.01988	0.01786		0.0343	0.0395	0.0294	0.024	0.0208	0.0298	0.0258	0.0149		0.00236	0.00532	-0.00501	-0.00244	0.00095	-0.00453	-0.00592	0.00296		5.5696e-06	2.83024e-05	2.51001e-05	5.9536e-06	9.025e-07	2.05209e-05	3.50464e-05	8.7616e-06
56.6	0.03706	0.04662	0.02424	0.01991	0.0202	0.02722	0.02188	0.01861		0.0344	0.0395	0.0295	0.0242	0.021	0.03	0.0259	0.0149		0.00266	0.00712	-0.00526	-0.00429	-0.0008	-0.00278	-0.00402	0.00371		7.0756e-06	5.06944e-05	2.76676e-05	1.84041e-05	6.4e-07	7.7284e-06	1.61604e-05	1.37641e-05
56.8	0.03696	0.04597	0.02264	0.02111	0.0217	0.03132	0.01753	0.01761		0.0344	0.0397	0.0296	0.0244	0.0212	0.0302	0.026	0.015		0.00256	0.00627	-0.00696	-0.00329	0.0005	0.00112	-0.00847	0.00261		6.5536e-06	3.93129e-05	4.84416e-05	1.08241e-05	2.5e-07	1.2544e-06	7.17409e-05	6.8121e-06
57	0.03736	0.04332	0.02399	0.02026	0.0211	0.02837	0.02188	0.01806		0.0344	0.0398	0.0297	0.0244	0.0214	0.0303	0.0262	0.0152		0.00296	0.00352	-0.00571	-0.00414	-0.0003	-0.00193	-0.00432	0.00286		8.7616e-06	1.23904e-05	3.26041e-05	1.71396e-05	9e-08	3.7249e-06	1.86624e-05	8.1796e-06
57.2	0.03741	0.04482	0.02244	0.02196	0.0223	0.02582	0.02248	0.01636		0.0344	0.0397	0.0298	0.0243	0.0214	0.0303	0.0263	0.0153		0.00301	0.00512	-0.00736	-0.00234	0.0009	-0.00448	-0.00382	0.00106		9.0601e-06	2.62144e-05	5.41696e-05	5.4756e-06	8.1e-07	2.00704e-05	1.45924e-05	1.1236e-06
57.4	0.03681	0.04497	0.02499	0.01996	0.0249	0.02677	0.02093	0.01976		0.0342	0.0395	0.0298	0.0243	0.0214	0.0303	0.0263	0.0153		0.00261	0.00547	-0.00481	-0.00434	0.0035	-0.00353	-0.00537	0.00446		6.8121e-06	2.99209e-05	2.31361e-05	1.88356e-05	1.225e-05	1.24609e-05	2.88369e-05	1.98916e-05
57.6	0.03711	0.04552	0.02289	0.02396	0.02585	0.02747	0.02413	0.01816		0.034	0.0391	0.0297	0.0243	0.0213	0.0304	0.0263	0.0152		0.00311	0.00642	-0.00681	-0.00034	0.00455	-0.00293	-0.00217	0.00296		9.6721e-06	4.12164e-05	4.63761e-05	1.156e-07	2.07025e-05	8.5849e-06	4.7089e-06	8.7616e-06
57.8	0.03781	0.04447	0.02209	0.02011	0.0266	0.02692	0.02208	0.01896		0.0338	0.0388	0.0296	0.0243	0.0214	0.0305	0.0264	0.0152		0.00401	0.00567	-0.00751	-0.00419	0.0052	-0.00358	-0.00432	0.00376		1.60801e-05	3.21489e-05	5.64001e-05	1.75561e-05	2.704e-05	1.28164e-05	1.86624e-05	1.41376e-05
58	0.03711	0.04682	0.02254	0.02051	0.0288	0.02742	0.02073	0.01806		0.0339	0.0387	0.0294	0.0244	0.0214	0.0305	0.0264	0.0151		0.00321	0.00812	-0.00686	-0.00389	0.0074	-0.00308	-0.00567	0.00296		1.03041e-05	6.59344e-05	4.70596e-05	1.51321e-05	5.476e-05	9.4864e-06	3.21489e-05	8.7616e-06
58.2	0.03761	0.04937	0.02154	0.02006	0.02295	0.02647	0.02248	0.01916		0.0339	0.0387	0.0293	0.0245	0.0216	0.0304	0.0264	0.0151		0.00371	0.01067	-0.00776	-0.00444	0.00135	-0.00393	-0.00392	0.00406		1.37641e-05	0.000113849	6.02176e-05	1.97136e-05	1.8225e-06	1.54449e-05	1.53664e-05	1.64836e-05
58.4	0.03686	0.05132	0.02349	0.02336	0.02485	0.02642	0.02178	0.01986		0.034	0.0387	0.0293	0.0245	0.0216	0.0303	0.0265	0.0152		0.00286	0.01262	-0.00581	-0.00114	0.00325	-0.00388	-0.00472	0.00466		8.1796e-06	0.000159264	3.37561e-05	1.2996e-06	1.05625e-05	1.50544e-05	2.22784e-05	2.17156e-05
58.6	0.03676	0.04957	0.02349	0.02086	0.02355	0.02702	0.02353	0.01876		0.034	0.0388	0.0294	0.0244	0.0215	0.0301	0.0265	0.0152		0.00276	0.01077	-0.00591	-0.00354	0.00205	-0.00308	-0.00297	0.00356		7.6176e-06	0.000115993	3.49281e-05	1.25316e-05	4.2025e-06	9.4864e-06	8.8209e-06	1.26736e-05
58.8	0.03721	0.04937	0.02144	0.02091	0.02495	0.02792	0.02153	0.01666		0.034	0.0388	0.0295	0.0243	0.0214	0.0301	0.0265	0.0152		0.00321	0.01057	-0.00806	-0.00339	0.00355	-0.00218	-0.00497	0.00146		1.03041e-05	0.000111725	6.49636e-05	1.14921e-05	1.26025e-05	4.7524e-06	2.47009e-05	2.1316e-06
59	0.03686	0.04882	0.02369	0.02296	0.0258	0.03112	0.02198	0.01726		0.034	0.0389	0.0296	0.0243	0.0213	0.0301	0.0264	0.0151		0.00286	0.00992	-0.00591	-0.00134	0.0045	0.00102	-0.00442	0.00216		8.1796e-06	9.84064e-05	3.49281e-05	1.7956e-06	2.025e-05	1.0404e-06	1.95364e-05	4.6656e-06
59.2	0.03836	0.04712	0.02344	0.02206	0.0274	0.02967	0.02228	0.01661		0.034	0.039	0.0297	0.0243	0.0213	0.0301	0.0264	0.015		0.00436	0.00812	-0.00626	-0.00224	0.0061	-0.00043	-0.00412	0.00161		1.90096e-05	6.59344e-05	3.91876e-05	5.0176e-06	3.721e-05	1.849e-07	1.69744e-05	2.5921e-06
59.4	0.03736	0.04587	0.02459	0.01946	0.02775	0.02847	0.02173	0.01706		0.034	0.0393	0.0297	0.0244	0.0213	0.0302	0.0263	0.015		0.00336	0.00657	-0.00511	-0.00494	0.00645	-0.00173	-0.00457	0.00206		1.12896e-05	4.31649e-05	2.61121e-05	2.44036e-05	4.16025e-05	2.9929e-06	2.08849e-05	4.2436e-06
59.6	0.03796	0.04642	0.02274	0.02311	0.02575	0.02852	0.02268	0.02011		0.0342	0.0398	0.0297	0.0245	0.0214	0.0302	0.0264	0.015		0.00376	0.00662	-0.00696	-0.00139	0.00435	-0.00168	-0.00372	0.00511		1.41376e-05	4.38244e-05	4.84416e-05	1.9321e-06	1.89225e-05	2.8224e-06	1.38384e-05	2.61121e-05
59.8	0.03706	0.04827	0.02204	0.02016	0.03275	0.02817	0.02248	0.01871		0.0345	0.0401	0.0297	0.0245	0.0215	0.0303	0.0264	0.0152		0.00256	0.00817	-0.00766	-0.00434	0.01125	-0.00213	-0.00392	0.00351		6.5536e-06	6.67489e-05	5.86756e-05	1.88356e-05	0.000126563	4.5369e-06	1.53664e-05	1.23201e-05
											0.0402	0.0299	0.0245	0.0215	0.0303	0.0265	0.0153		0	-0.0402	-0.0299	-0.0245	-0.0215	-0.0303	-0.0265	-0.0153		0	0.00161604	0.00089401	0.00060025	0.00046225	0.00091809	0.00070225	0.00023409

## Sheet: RMSE_Meshsize0.5
t	S3	S4	S5	S6	S7	S8	S9	S10		HEC_1A_5_P3	HEC_1A_5_P4	HEC_1A_5_P5	HEC_1A_5_P6	HEC_1A_5_P7	HEC_1A_5_P8	HEC_1A_5_P9	HEC_1A_5_P10		Error 3	Error 4	Error 5	Error 6	Error 7	Error 8	Error 9	Error 10		Error ^2_3	Error ^2_4	Error ^2_5	Error ^2_6	Error ^2_7	Error ^2_8	Error ^2_9	Error ^2_10		RMSE 3	RMSE 4	RMSE 5	RMSE 6	RMSE 7	RMSE 8	RMSE 9	RMSE 10
0	0.00011	-8e-05	0.00039	6e-05	0	-3e-05	-7e-05	-4e-05		0	0	0	0	0	0	0	0		0.00011	-8e-05	0.00039	6e-05	0	-3e-05	-7e-05	-4e-05		1.21e-08	6.4e-09	1.521e-07	3.6e-09	0	9e-10	4.9e-09	1.6e-09		1.19198	1.37525	1.27114	0.520991	0.731773	0.618362	0.545539	0.396436
0.2	-0.00014	7e-05	-6e-05	0.00011	0	-3e-05	-7e-05	-9e-05		0	0	0	0	0	0	0	0		-0.00014	7e-05	-6e-05	0.00011	0	-3e-05	-7e-05	-9e-05		1.96e-08	4.9e-09	3.6e-09	1.21e-08	0	9e-10	4.9e-09	8.1e-09
0.4	-0.00014	-3e-05	-6e-05	6e-05	-0.00015	0.00012	-2e-05	-9e-05		0	0	0	0	0	0	0	0		-0.00014	-3e-05	-6e-05	6e-05	-0.00015	0.00012	-2e-05	-9e-05		1.96e-08	9e-10	3.6e-09	3.6e-09	2.25e-08	1.44e-08	4e-10	8.1e-09
0.6	6e-05	2e-05	-6e-05	6e-05	5e-05	-8e-05	3e-05	-9e-05		0	0	0	0	0	0	0	0		6e-05	2e-05	-6e-05	6e-05	5e-05	-8e-05	3e-05	-9e-05		3.6e-09	4e-10	3.6e-09	3.6e-09	2.5e-09	6.4e-09	9e-10	8.1e-09
0.8	1e-05	-0.00013	4e-05	6e-05	-5e-05	-3e-05	3e-05	-9e-05		0	0	0	0	0	0	0	0		1e-05	-0.00013	4e-05	6e-05	-5e-05	-3e-05	3e-05	-9e-05		1e-10	1.69e-08	1.6e-09	3.6e-09	2.5e-09	9e-10	9e-10	8.1e-09
1	-0.00014	0.00017	-6e-05	6e-05	-0.00015	0.00012	3e-05	-0.00014		0	0	0	0	0	0	0	0		-0.00014	0.00017	-6e-05	6e-05	-0.00015	0.00012	3e-05	-0.00014		1.96e-08	2.89e-08	3.6e-09	3.6e-09	2.25e-08	1.44e-08	9e-10	1.96e-08
1.2	1e-05	-3e-05	-0.00021	1e-05	0.0001	-3e-05	-2e-05	-0.00014		0	0	0	0	0	0	0	0		1e-05	-3e-05	-0.00021	1e-05	0.0001	-3e-05	-2e-05	-0.00014		1e-10	9e-10	4.41e-08	1e-10	1e-08	9e-10	4e-10	1.96e-08
1.4	1e-05	-3e-05	9e-05	6e-05	0	-3e-05	-2e-05	-0.00014		0	0	0	0	0	0	0	0		1e-05	-3e-05	9e-05	6e-05	0	-3e-05	-2e-05	-0.00014		1e-10	9e-10	8.1e-09	3.6e-09	0	9e-10	4e-10	1.96e-08
1.6	0.00026	-0.00013	4e-05	-4e-05	-5e-05	0.00012	-2e-05	-0.00014		0	0	0	0	0	0	0	0		0.00026	-0.00013	4e-05	-4e-05	-5e-05	0.00012	-2e-05	-0.00014		6.76e-08	1.69e-08	1.6e-09	1.6e-09	2.5e-09	1.44e-08	4e-10	1.96e-08
1.8	1e-05	0.00027	-1e-05	-4e-05	0.0002	-0.00013	3e-05	-0.00014		0	0	0	0	0	0	0	0		1e-05	0.00027	-1e-05	-4e-05	0.0002	-0.00013	3e-05	-0.00014		1e-10	7.29e-08	1e-10	1.6e-09	4e-08	1.69e-08	9e-10	1.96e-08
2	-9e-05	2e-05	-1e-05	1e-05	0	-3e-05	0.00013	-9e-05		0	0	0	0	0	0	0	0		-9e-05	2e-05	-1e-05	1e-05	0	-3e-05	0.00013	-9e-05		8.1e-09	4e-10	1e-10	1e-10	0	9e-10	1.69e-08	8.1e-09
2.2	0.00011	-0.00018	-1e-05	-4e-05	0	0.00012	0.00013	-9e-05		0	0	0	0	0	0	0	0		0.00011	-0.00018	-1e-05	-4e-05	0	0.00012	0.00013	-9e-05		1.21e-08	3.24e-08	1e-10	1.6e-09	0	1.44e-08	1.69e-08	8.1e-09
2.4	1e-05	-0.00013	-1e-05	1e-05	-0.00015	-0.00013	0.00013	1e-05		0	0	0	0	0	0	0	0		1e-05	-0.00013	-1e-05	1e-05	-0.00015	-0.00013	0.00013	1e-05		1e-10	1.69e-08	1e-10	1e-10	2.25e-08	1.69e-08	1.69e-08	1e-10
2.6	-9e-05	0.00032	-0.00016	-4e-05	5e-05	7e-05	0.00023	0.00011		0	0	0	0	0	0	0	0		-9e-05	0.00032	-0.00016	-4e-05	5e-05	7e-05	0.00023	0.00011		8.1e-09	1.024e-07	2.56e-08	1.6e-09	2.5e-09	4.9e-09	5.29e-08	1.21e-08
2.8	0.00011	7e-05	4e-05	-4e-05	0	0.00012	-7e-05	0.00031		0	0	0	0	0	0	0	0		0.00011	7e-05	4e-05	-4e-05	0	0.00012	-7e-05	0.00031		1.21e-08	4.9e-09	1.6e-09	1.6e-09	0	1.44e-08	4.9e-09	9.61e-08
3	1e-05	-8e-05	4e-05	-4e-05	-0.00015	-0.00013	-0.00012	0.00021		0	0	0	0	0	0	0	0		1e-05	-8e-05	4e-05	-4e-05	-0.00015	-0.00013	-0.00012	0.00021		1e-10	6.4e-09	1.6e-09	1.6e-09	2.25e-08	1.69e-08	1.44e-08	4.41e-08
3.2	-0.00014	-0.00013	-0.00016	-9e-05	0.0001	-0.00013	-0.00012	0.00011		0	0	0	0	0	0	0	0		-0.00014	-0.00013	-0.00016	-9e-05	0.0001	-0.00013	-0.00012	0.00011		1.96e-08	1.69e-08	2.56e-08	8.1e-09	1e-08	1.69e-08	1.44e-08	1.21e-08
3.4	6e-05	0.00017	0.00034	-4e-05	0	0.00012	-7e-05	0.00011		0	0	0	0	0	0	0	0		6e-05	0.00017	0.00034	-4e-05	0	0.00012	-7e-05	0.00011		3.6e-09	2.89e-08	1.156e-07	1.6e-09	0	1.44e-08	4.9e-09	1.21e-08
3.6	1e-05	-3e-05	-6e-05	-9e-05	0	-0.00018	-7e-05	0.00016		0	0	0	0	0	0	0	0		1e-05	-3e-05	-6e-05	-9e-05	0	-0.00018	-7e-05	0.00016		1e-10	9e-10	3.6e-09	8.1e-09	0	3.24e-08	4.9e-09	2.56e-08
3.8	-0.00014	2e-05	-1e-05	-4e-05	0.0002	7e-05	-2e-05	0.00011		0	0	0	0	0	0	0	0		-0.00014	2e-05	-1e-05	-4e-05	0.0002	7e-05	-2e-05	0.00011		1.96e-08	4e-10	1e-10	1.6e-09	4e-08	4.9e-09	4e-10	1.21e-08
4	1e-05	-8e-05	-0.00016	-9e-05	0	2e-05	-2e-05	6e-05		0	0	0	0	0	0	0	0		1e-05	-8e-05	-0.00016	-9e-05	0	2e-05	-2e-05	6e-05		1e-10	6.4e-09	2.56e-08	8.1e-09	0	4e-10	4e-10	3.6e-09
4.2	-4e-05	7e-05	-1e-05	-9e-05	-5e-05	-0.00018	-0.00017	6e-05		0	0	0	0	0	0	0	0		-4e-05	7e-05	-1e-05	-9e-05	-5e-05	-0.00018	-0.00017	6e-05		1.6e-09	4.9e-09	1e-10	8.1e-09	2.5e-09	3.24e-08	2.89e-08	3.6e-09
4.4	0.00011	7e-05	-0.00016	-9e-05	5e-05	-8e-05	3e-05	6e-05		0	0	0	0	0	0	0	0		0.00011	7e-05	-0.00016	-9e-05	5e-05	-8e-05	3e-05	6e-05		1.21e-08	4.9e-09	2.56e-08	8.1e-09	2.5e-09	6.4e-09	9e-10	3.6e-09
4.6	-4e-05	-3e-05	-0.00021	-4e-05	5e-05	2e-05	3e-05	1e-05		0	0	0	0	0	0	0	0		-4e-05	-3e-05	-0.00021	-4e-05	5e-05	2e-05	3e-05	1e-05		1.6e-09	9e-10	4.41e-08	1.6e-09	2.5e-09	4e-10	9e-10	1e-10
4.8	-9e-05	-8e-05	4e-05	-4e-05	-5e-05	-0.00023	-2e-05	6e-05		0	0	0	0	0	0	0	0		-9e-05	-8e-05	4e-05	-4e-05	-5e-05	-0.00023	-2e-05	6e-05		8.1e-09	6.4e-09	1.6e-09	1.6e-09	2.5e-09	5.29e-08	4e-10	3.6e-09
5	0.00016	-8e-05	-6e-05	1e-05	-0.0002	-3e-05	3e-05	1e-05		0	0	0	0	0	0	0	0		0.00016	-8e-05	-6e-05	1e-05	-0.0002	-3e-05	3e-05	1e-05		2.56e-08	6.4e-09	3.6e-09	1e-10	4e-08	9e-10	9e-10	1e-10
5.2	-4e-05	7e-05	-0.00011	1e-05	5e-05	-3e-05	8e-05	1e-05		0	0	0	0	0	0	0	0		-4e-05	7e-05	-0.00011	1e-05	5e-05	-3e-05	8e-05	1e-05		1.6e-09	4.9e-09	1.21e-08	1e-10	2.5e-09	9e-10	6.4e-09	1e-10
5.4	-0.00014	2e-05	9e-05	-9e-05	-0.0001	-0.00018	8e-05	1e-05		0	0	0	0	0	0	0	0		-0.00014	2e-05	9e-05	-9e-05	-0.0001	-0.00018	8e-05	1e-05		1.96e-08	4e-10	8.1e-09	8.1e-09	1e-08	3.24e-08	6.4e-09	1e-10
5.6	6e-05	-3e-05	-6e-05	-0.00019	-0.0001	-0.00013	0.00013	-9e-05		0	0	0	0	0	0	0	0		6e-05	-3e-05	-6e-05	-0.00019	-0.0001	-0.00013	0.00013	-9e-05		3.6e-09	9e-10	3.6e-09	3.61e-08	1e-08	1.69e-08	1.69e-08	8.1e-09
5.8	1e-05	-8e-05	-6e-05	1e-05	0.0001	-8e-05	0.00033	-4e-05		0	0	0	0	0	0	0	0		1e-05	-8e-05	-6e-05	1e-05	0.0001	-8e-05	0.00033	-4e-05		1e-10	6.4e-09	3.6e-09	1e-10	1e-08	6.4e-09	1.089e-07	1.6e-09
6	-0.00014	7e-05	-0.00021	-4e-05	-0.0001	-3e-05	3e-05	1e-05		0	0	0	0	0	0	0	0		-0.00014	7e-05	-0.00021	-4e-05	-0.0001	-3e-05	3e-05	1e-05		1.96e-08	4.9e-09	4.41e-08	1.6e-09	1e-08	9e-10	9e-10	1e-10
6.2	6e-05	-3e-05	-1e-05	-4e-05	0	-0.00013	-0.00017	-4e-05		0	0	0	0	0	0	0	0		6e-05	-3e-05	-1e-05	-4e-05	0	-0.00013	-0.00017	-4e-05		3.6e-09	9e-10	1e-10	1.6e-09	0	1.69e-08	2.89e-08	1.6e-09
6.4	1e-05	-3e-05	4e-05	-4e-05	0.0002	2e-05	-0.00012	-4e-05		0	0	0	0	0	0	0	0		1e-05	-3e-05	4e-05	-4e-05	0.0002	2e-05	-0.00012	-4e-05		1e-10	9e-10	1.6e-09	1.6e-09	4e-08	4e-10	1.44e-08	1.6e-09
6.6	-0.00014	-0.00013	-0.00016	-4e-05	0	0.00032	-7e-05	1e-05		0	0	0	0	0	0	0	0		-0.00014	-0.00013	-0.00016	-4e-05	0	0.00032	-7e-05	1e-05		1.96e-08	1.69e-08	2.56e-08	1.6e-09	0	1.024e-07	4.9e-09	1e-10
6.8	1e-05	2e-05	0.00014	-9e-05	0	-0.00013	-7e-05	-4e-05		0	0	0	0	0	0	0	0		1e-05	2e-05	0.00014	-9e-05	0	-0.00013	-7e-05	-4e-05		1e-10	4e-10	1.96e-08	8.1e-09	0	1.69e-08	4.9e-09	1.6e-09
7	-4e-05	2e-05	-6e-05	-9e-05	-0.00015	-0.00018	-2e-05	1e-05		0	0	0	0	0	0	0	0		-4e-05	2e-05	-6e-05	-9e-05	-0.00015	-0.00018	-2e-05	1e-05		1.6e-09	4e-10	3.6e-09	8.1e-09	2.25e-08	3.24e-08	4e-10	1e-10
7.2	6e-05	-0.00013	-6e-05	-4e-05	5e-05	-3e-05	-2e-05	-4e-05		0	0	0	0	0	0	0	0		6e-05	-0.00013	-6e-05	-4e-05	5e-05	-3e-05	-2e-05	-4e-05		3.6e-09	1.69e-08	3.6e-09	1.6e-09	2.5e-09	9e-10	4e-10	1.6e-09
7.4	1e-05	-0.00018	-0.00016	-9e-05	0	-0.00018	8e-05	-0.00014		0	0	0	0	0	0	0	0		1e-05	-0.00018	-0.00016	-9e-05	0	-0.00018	8e-05	-0.00014		1e-10	3.24e-08	2.56e-08	8.1e-09	0	3.24e-08	6.4e-09	1.96e-08
7.6	-9e-05	0.00012	-6e-05	-0.00014	-0.0002	-8e-05	3e-05	-4e-05		0	0	0	0	0	0	0	0		-9e-05	0.00012	-6e-05	-0.00014	-0.0002	-8e-05	3e-05	-4e-05		8.1e-09	1.44e-08	3.6e-09	1.96e-08	4e-08	6.4e-09	9e-10	1.6e-09
7.8	0.00011	2e-05	-0.00026	-4e-05	5e-05	2e-05	3e-05	1e-05		0	0	0	0	0	0	0	0		0.00011	2e-05	-0.00026	-4e-05	5e-05	2e-05	3e-05	1e-05		1.21e-08	4e-10	6.76e-08	1.6e-09	2.5e-09	4e-10	9e-10	1e-10
8	-4e-05	-3e-05	-0.00021	-0.00014	-5e-05	-0.00018	-2e-05	-4e-05		0	0	0	0	0	0	0	0		-4e-05	-3e-05	-0.00021	-0.00014	-5e-05	-0.00018	-2e-05	-4e-05		1.6e-09	9e-10	4.41e-08	1.96e-08	2.5e-09	3.24e-08	4e-10	1.6e-09
8.2	-0.00014	-0.00018	4e-05	-0.00014	-0.0001	-3e-05	-2e-05	-9e-05		0	0	0	0	0	0	0	0		-0.00014	-0.00018	4e-05	-0.00014	-0.0001	-3e-05	-2e-05	-9e-05		1.96e-08	3.24e-08	1.6e-09	1.96e-08	1e-08	9e-10	4e-10	8.1e-09
8.4	6e-05	7e-05	-6e-05	-0.00014	0.0001	2e-05	8e-05	-9e-05		0	0	0	0	0	0	0	0		6e-05	7e-05	-6e-05	-0.00014	0.0001	2e-05	8e-05	-9e-05		3.6e-09	4.9e-09	3.6e-09	1.96e-08	1e-08	4e-10	6.4e-09	8.1e-09
8.6	1e-05	-3e-05	-0.00016	-9e-05	-5e-05	-0.00023	8e-05	-9e-05		0	0	0	0	0	0	0	0		1e-05	-3e-05	-0.00016	-9e-05	-5e-05	-0.00023	8e-05	-9e-05		1e-10	9e-10	2.56e-08	8.1e-09	2.5e-09	5.29e-08	6.4e-09	8.1e-09
8.8	-0.00014	-8e-05	0.00024	-0.00014	-5e-05	2e-05	8e-05	-0.00014		0	0	0	0	0	0	0	0		-0.00014	-8e-05	0.00024	-0.00014	-5e-05	2e-05	8e-05	-0.00014		1.96e-08	6.4e-09	5.76e-08	1.96e-08	2.5e-09	4e-10	6.4e-09	1.96e-08
9	6e-05	-0.00013	-6e-05	-0.00014	0	-3e-05	0.00013	-0.00014		0	0	0	0	0	0	0	0		6e-05	-0.00013	-6e-05	-0.00014	0	-3e-05	0.00013	-0.00014		3.6e-09	1.69e-08	3.6e-09	1.96e-08	0	9e-10	1.69e-08	1.96e-08
9.2	1e-05	0.00012	-6e-05	-0.00019	0	-0.00023	8e-05	-0.00014		0	0	0	0	0	0	0	0		1e-05	0.00012	-6e-05	-0.00019	0	-0.00023	8e-05	-0.00014		1e-10	1.44e-08	3.6e-09	3.61e-08	0	5.29e-08	6.4e-09	1.96e-08
9.4	-0.00014	-3e-05	-0.00021	-0.00019	0	-8e-05	-0.00012	-9e-05		0	0	0	0	0	0	0	0		-0.00014	-3e-05	-0.00021	-0.00019	0	-8e-05	-0.00012	-9e-05		1.96e-08	9e-10	4.41e-08	3.61e-08	0	6.4e-09	1.44e-08	8.1e-09
9.6	-4e-05	-8e-05	4e-05	-0.00019	-0.00015	-0.00013	-0.00012	-0.00014		0	0	0	0	0	0	0	0		-4e-05	-8e-05	4e-05	-0.00019	-0.00015	-0.00013	-0.00012	-0.00014		1.6e-09	6.4e-09	1.6e-09	3.61e-08	2.25e-08	1.69e-08	1.44e-08	1.96e-08
9.8	-4e-05	-0.00018	-1e-05	-0.00024	0	-0.00013	-0.00012	-0.00019		0	0	0	0	0	0	0	0		-4e-05	-0.00018	-1e-05	-0.00024	0	-0.00013	-0.00012	-0.00019		1.6e-09	3.24e-08	1e-10	5.76e-08	0	1.69e-08	1.44e-08	3.61e-08
10	1e-05	7e-05	-0.00021	-0.00019	-0.0002	-0.00013	-7e-05	-0.00014		0	0	0	0	0	0	0	0		1e-05	7e-05	-0.00021	-0.00019	-0.0002	-0.00013	-7e-05	-0.00014		1e-10	4.9e-09	4.41e-08	3.61e-08	4e-08	1.69e-08	4.9e-09	1.96e-08
10.2	-4e-05	-3e-05	9e-05	-0.00019	-0.0002	-8e-05	-7e-05	-0.00014		0	0	0	0	0	0	0	0		-4e-05	-3e-05	9e-05	-0.00019	-0.0002	-8e-05	-7e-05	-0.00014		1.6e-09	9e-10	8.1e-09	3.61e-08	4e-08	6.4e-09	4.9e-09	1.96e-08
10.4	-9e-05	-3e-05	-6e-05	-0.00024	5e-05	0.00027	-2e-05	-0.00019		0	0	0	0	0	0	0	0		-9e-05	-3e-05	-6e-05	-0.00024	5e-05	0.00027	-2e-05	-0.00019		8.1e-09	9e-10	3.6e-09	5.76e-08	2.5e-09	7.29e-08	4e-10	3.61e-08
10.6	0.00011	-0.00013	-0.00011	-0.00024	-0.0001	-0.00013	3e-05	-0.00014		0	0	0	0	0	0	0	0		0.00011	-0.00013	-0.00011	-0.00024	-0.0001	-0.00013	3e-05	-0.00014		1.21e-08	1.69e-08	1.21e-08	5.76e-08	1e-08	1.69e-08	9e-10	1.96e-08
10.8	-9e-05	0.00012	4e-05	-0.00024	-0.00015	-8e-05	-2e-05	-0.00019		0	0.0405	0	0	0	0	0	0		-9e-05	-0.04038	4e-05	-0.00024	-0.00015	-8e-05	-2e-05	-0.00019		8.1e-09	0.00163054	1.6e-09	5.76e-08	2.25e-08	6.4e-09	4e-10	3.61e-08
11	-9e-05	0.01222	-6e-05	-0.00024	0.00015	2e-05	-2e-05	-0.00014		0.0276	0.0549	0	0	0	0	0	0		-0.02769	-0.04268	-6e-05	-0.00024	0.00015	2e-05	-2e-05	-0.00014		0.000766736	0.00182158	3.6e-09	5.76e-08	2.25e-08	4e-10	4e-10	1.96e-08
11.2	0.00856	0.01177	-6e-05	-0.00034	0	-0.00013	-7e-05	-9e-05		0.0409	0.078	0.0185	0	0	0	0	0		-0.03234	-0.06623	-0.01856	-0.00034	0	-0.00013	-7e-05	-9e-05		0.00104588	0.00438641	0.000344474	1.156e-07	0	1.69e-08	4.9e-09	8.1e-09
11.4	0.01061	0.01367	0.00559	-0.00024	-5e-05	-8e-05	8e-05	1e-05		0.0589	0.0797	0.0399	0	0	0	0	0		-0.04829	-0.06603	-0.03431	-0.00024	-5e-05	-8e-05	8e-05	1e-05		0.00233192	0.00435996	0.00117718	5.76e-08	2.5e-09	6.4e-09	6.4e-09	1e-10
11.6	0.01181	0.02292	0.01494	-0.00024	-0.0002	2e-05	3e-05	0.00011		0.0618	0.0739	0.0405	0	0	0	0	0		-0.04999	-0.05098	-0.02556	-0.00024	-0.0002	2e-05	3e-05	0.00011		0.002499	0.00259896	0.000653314	5.76e-08	4e-08	4e-10	9e-10	1.21e-08
11.8	0.01331	0.03092	0.01844	-0.00029	5e-05	-0.00023	-2e-05	0.00026		0.0662	0.072	0.0402	0	0	0	0	0		-0.05289	-0.04108	-0.02176	-0.00029	5e-05	-0.00023	-2e-05	0.00026		0.00279735	0.00168757	0.000473498	8.41e-08	2.5e-09	5.29e-08	4e-10	6.76e-08
12	0.01706	0.03382	0.01754	0.00066	0	0.00627	8e-05	0.00016		0.0667	0.0711	0.0427	0.0169	0	0.036	0	0		-0.04964	-0.03728	-0.02516	-0.01624	0	-0.02973	8e-05	0.00016		0.00246413	0.0013898	0.000633026	0.000263738	0	0.000883873	6.4e-09	2.56e-08
12.2	0.01746	0.03642	0.01979	0.00136	-0.00015	0.01307	8e-05	0.00011		0.0647	0.071	0.0478	0.0242	0	0.0379	0	0		-0.04724	-0.03458	-0.02801	-0.02284	-0.00015	-0.02483	8e-05	0.00011		0.00223162	0.00119578	0.00078456	0.000521666	2.25e-08	0.000616529	6.4e-09	1.21e-08
12.4	0.02076	0.04367	0.02344	0.00266	0.0067	0.01547	0.00033	6e-05		0.061	0.072	0.0495	0.0341	0.0296	0.0398	0.0167	0		-0.04024	-0.02833	-0.02606	-0.03144	-0.0229	-0.02433	-0.01637	6e-05		0.00161926	0.000802589	0.000679124	0.000988474	0.00052441	0.000591949	0.000267977	3.6e-09
12.6	0.02851	0.04817	0.02414	0.01246	0.0123	0.01622	0.00098	6e-05		0.0592	0.0737	0.0497	0.0333	0.0291	0.0449	0.0143	0		-0.03069	-0.02553	-0.02556	-0.02084	-0.0168	-0.02868	-0.01332	6e-05		0.000941876	0.000651781	0.000653314	0.000434306	0.00028224	0.000822542	0.000177422	3.6e-09
12.8	0.03826	0.06057	0.02669	0.01386	0.01965	0.01752	0.00308	1e-05		0.0575	0.0761	0.0503	0.0352	0.0277	0.0427	0.0305	0		-0.01924	-0.01553	-0.02361	-0.02134	-0.00805	-0.02518	-0.02742	1e-05		0.000370178	0.000241181	0.000557432	0.000455396	6.48025e-05	0.000634032	0.000751856	1e-10
13	0.04916	0.07412	0.02794	0.02156	0.02145	0.01862	0.00578	1e-05		0.0569	0.0783	0.05	0.0338	0.031	0.0427	0.0352	0		-0.00774	-0.00418	-0.02206	-0.01224	-0.00955	-0.02408	-0.02942	1e-05		5.99076e-05	1.74724e-05	0.000486644	0.000149818	9.12025e-05	0.000579846	0.000865536	1e-10
13.2	0.06541	0.07367	0.02954	0.01996	0.0256	0.01972	0.01258	-0.00124		0.0586	0.0801	0.0497	0.0364	0.0339	0.0428	0.0323	0.0197		0.00681	-0.00643	-0.02016	-0.01644	-0.0083	-0.02308	-0.01972	-0.02094		4.63761e-05	4.13449e-05	0.000406426	0.000270274	6.889e-05	0.000532686	0.000388878	0.000438484
13.4	0.08311	0.08617	0.03114	0.02486	0.02465	0.02162	0.01458	0.01201		0.062	0.079	0.0506	0.0381	0.033	0.0449	0.0382	0.0211		0.02111	0.00717	-0.01946	-0.01324	-0.00835	-0.02328	-0.02362	-0.00909		0.000445632	5.14089e-05	0.000378692	0.000175298	6.97225e-05	0.000541958	0.000557904	8.26281e-05
13.6	0.09356	0.10002	0.03409	0.02051	0.02425	0.02432	0.01683	0.01401		0.0644	0.0808	0.0517	0.0382	0.0333	0.047	0.0413	0.0222		0.02916	0.01922	-0.01761	-0.01769	-0.00905	-0.02268	-0.02447	-0.00819		0.000850306	0.000369408	0.000310112	0.000312936	8.19025e-05	0.000514382	0.000598781	6.70761e-05
13.8	0.09211	0.11207	0.03734	0.02026	0.0322	0.03217	0.01813	0.01666		0.0659	0.0827	0.0533	0.0403	0.033	0.0482	0.039	0.0213		0.02621	0.02937	-0.01596	-0.02004	-0.0008	-0.01603	-0.02087	-0.00464		0.000686964	0.000862597	0.000254722	0.000401602	6.4e-07	0.000256961	0.000435557	2.15296e-05
14	0.08721	0.10767	0.03649	0.02336	0.02875	0.03472	0.01658	0.01921		0.0662	0.0838	0.0548	0.0408	0.0347	0.0493	0.0413	0.0212		0.02101	0.02387	-0.01831	-0.01744	-0.00595	-0.01458	-0.02472	-0.00199		0.00044142	0.000569777	0.000335256	0.000304154	3.54025e-05	0.000212576	0.000611078	3.9601e-06
14.2	0.08866	0.08122	0.03739	0.02111	0.032	0.03662	0.02648	0.01711		0.0663	0.0857	0.0561	0.0414	0.037	0.0505	0.042	0.0222		0.02236	-0.00448	-0.01871	-0.02029	-0.005	-0.01388	-0.01552	-0.00509		0.00049997	2.00704e-05	0.000350064	0.000411684	2.5e-05	0.000192654	0.00024087	2.59081e-05
14.4	0.06751	0.05867	0.03899	0.02611	0.0382	0.03537	0.03343	0.01686		0.0671	0.0873	0.0566	0.042	0.0384	0.0514	0.0425	0.0229		0.00041	-0.02863	-0.01761	-0.01589	-0.0002	-0.01603	-0.00907	-0.00604		1.681e-07	0.000819677	0.000310112	0.000252492	4e-08	0.000256961	8.22649e-05	3.64816e-05
14.6	0.07586	0.06127	0.03879	0.02996	0.04085	0.03697	0.02658	0.01986		0.0664	0.0863	0.0568	0.0426	0.0388	0.0527	0.043	0.0233		0.00946	-0.02503	-0.01801	-0.01264	0.00205	-0.01573	-0.01642	-0.00344		8.94916e-05	0.000626501	0.00032436	0.00015977	4.2025e-06	0.000247433	0.000269616	1.18336e-05
14.8	0.07081	0.06082	0.03624	0.02856	0.0364	0.04277	0.02558	0.02331		0.0672	0.0857	0.0573	0.043	0.0388	0.053	0.0435	0.0234		0.00361	-0.02488	-0.02106	-0.01444	-0.0024	-0.01023	-0.01792	-9e-05		1.30321e-05	0.000619014	0.000443524	0.000208514	5.76e-06	0.000104653	0.000321126	8.1e-09
15	0.05986	0.06542	0.03179	0.03486	0.04535	0.05187	0.03303	0.02011		0.0671	0.0844	0.0581	0.0439	0.0393	0.054	0.0434	0.0234		-0.00724	-0.01898	-0.02631	-0.00904	0.00605	-0.00213	-0.01037	-0.00329		5.24176e-05	0.00036024	0.000692216	8.17216e-05	3.66025e-05	4.5369e-06	0.000107537	1.08241e-05
15.2	0.05676	0.06552	0.03439	0.02776	0.04495	0.04847	0.03698	0.01876		0.068	0.0845	0.0581	0.0443	0.0397	0.0543	0.0443	0.0237		-0.01124	-0.01898	-0.02371	-0.01654	0.00525	-0.00583	-0.00732	-0.00494		0.000126338	0.00036024	0.000562164	0.000273572	2.75625e-05	3.39889e-05	5.35824e-05	2.44036e-05
15.4	0.05421	0.06997	0.03574	0.03796	0.0441	0.04777	0.03878	0.02191		0.0689	0.0838	0.059	0.0447	0.0403	0.0543	0.0448	0.0242		-0.01469	-0.01383	-0.02326	-0.00674	0.0038	-0.00653	-0.00602	-0.00229		0.000215796	0.000191269	0.000541028	4.54276e-05	1.444e-05	4.26409e-05	3.62404e-05	5.2441e-06
15.6	0.05036	0.06872	0.03814	0.04091	0.0384	0.04587	0.03318	0.02261		0.0687	0.0842	0.0583	0.0457	0.0409	0.0546	0.0453	0.0247		-0.01834	-0.01548	-0.02016	-0.00479	-0.0025	-0.00873	-0.01212	-0.00209		0.000336356	0.00023963	0.000406426	2.29441e-05	6.25e-06	7.62129e-05	0.000146894	4.3681e-06
15.8	0.06066	0.07227	0.04424	0.03876	0.04365	0.04272	0.03988	0.02541		0.0698	0.0853	0.0593	0.0465	0.0416	0.0548	0.0461	0.025		-0.00914	-0.01303	-0.01506	-0.00774	0.00205	-0.01208	-0.00622	0.00041		8.35396e-05	0.000169781	0.000226804	5.99076e-05	4.2025e-06	0.000145926	3.86884e-05	1.681e-07
16	0.06731	0.07332	0.03969	0.04041	0.0455	0.04337	0.03938	0.02546		0.0699	0.0856	0.0603	0.0473	0.0423	0.0554	0.0469	0.0253		-0.00259	-0.01228	-0.02061	-0.00689	0.0032	-0.01203	-0.00752	0.00016		6.7081e-06	0.000150798	0.000424772	4.74721e-05	1.024e-05	0.000144721	5.65504e-05	2.56e-08
16.2	0.06436	0.06372	0.04259	0.03921	0.0442	0.04602	0.04133	0.03281		0.0703	0.0849	0.0611	0.0481	0.0425	0.0563	0.0479	0.0258		-0.00594	-0.02118	-0.01851	-0.00889	0.0017	-0.01028	-0.00657	0.00701		3.52836e-05	0.000448592	0.00034262	7.90321e-05	2.89e-06	0.000105678	4.31649e-05	4.91401e-05
16.4	0.06821	0.07677	0.04159	0.04831	0.0434	0.04847	0.03748	0.03076		0.0702	0.0836	0.0612	0.0488	0.0429	0.0571	0.0487	0.0262		-0.00199	-0.00683	-0.01961	-0.00049	0.0005	-0.00863	-0.01122	0.00456		3.9601e-06	4.66489e-05	0.000384552	2.401e-07	2.5e-07	7.44769e-05	0.000125888	2.07936e-05
16.6	0.06966	0.08267	0.04069	0.04286	0.0529	0.05132	0.03973	0.02791		0.07	0.0817	0.0609	0.0494	0.0435	0.0576	0.0491	0.0265		-0.00034	0.00097	-0.02021	-0.00654	0.0094	-0.00628	-0.00937	0.00141		1.156e-07	9.409e-07	0.000408444	4.27716e-05	8.836e-05	3.94384e-05	8.77969e-05	1.9881e-06
16.8	0.07811	0.07867	0.04249	0.04676	0.05315	0.04997	0.03463	0.02311		0.069	0.0787	0.0603	0.0493	0.0443	0.0575	0.0493	0.0268		0.00911	-3e-05	-0.01781	-0.00254	0.00885	-0.00753	-0.01467	-0.00369		8.29921e-05	9e-10	0.000317196	6.4516e-06	7.83225e-05	5.67009e-05	0.000215209	1.36161e-05
17	0.08626	0.08157	0.03964	0.05101	0.0476	0.05247	0.04443	0.02456		0.068	0.0773	0.0591	0.049	0.0445	0.0571	0.0492	0.0271		0.01826	0.00427	-0.01946	0.00201	0.0031	-0.00463	-0.00477	-0.00254		0.000333428	1.82329e-05	0.000378692	4.0401e-06	9.61e-06	2.14369e-05	2.27529e-05	6.4516e-06
17.2	0.08441	0.08422	0.03949	0.04191	0.04965	0.04977	0.04223	0.02706		0.067	0.0763	0.0585	0.0487	0.0444	0.0565	0.0489	0.0272		0.01741	0.00792	-0.01901	-0.00679	0.00525	-0.00673	-0.00667	-0.00014		0.000303108	6.27264e-05	0.00036138	4.61041e-05	2.75625e-05	4.52929e-05	4.44889e-05	1.96e-08
17.4	0.08701	0.08477	0.03994	0.04271	0.0484	0.05367	0.04253	0.02731		0.066	0.0748	0.0577	0.0481	0.044	0.0556	0.0484	0.027		0.02101	0.00997	-0.01776	-0.00539	0.0044	-0.00193	-0.00587	0.00031		0.00044142	9.94009e-05	0.000315418	2.90521e-05	1.936e-05	3.7249e-06	3.44569e-05	9.61e-08
17.6	0.07881	0.08287	0.03749	0.03821	0.04505	0.05327	0.04738	0.03041		0.0651	0.0736	0.057	0.0477	0.0433	0.0548	0.0478	0.0268		0.01371	0.00927	-0.01951	-0.00949	0.00175	-0.00153	-0.00042	0.00361		0.000187964	8.59329e-05	0.00038064	9.00601e-05	3.0625e-06	2.3409e-06	1.764e-07	1.30321e-05
17.8	0.07731	0.08347	0.03819	0.04576	0.0425	0.05247	0.04328	0.03136		0.0642	0.0724	0.0564	0.0473	0.0428	0.0542	0.0472	0.0265		0.01311	0.01107	-0.01821	-0.00154	-0.0003	-0.00173	-0.00392	0.00486		0.000171872	0.000122545	0.000331604	2.3716e-06	9e-08	2.9929e-06	1.53664e-05	2.36196e-05
18	0.07666	0.08562	0.03779	0.04756	0.0511	0.05212	0.04523	0.02721		0.0632	0.0709	0.0559	0.0469	0.0423	0.0536	0.0467	0.0263		0.01346	0.01472	-0.01811	0.00066	0.0088	-0.00148	-0.00147	0.00091		0.000181172	0.000216678	0.000327972	4.356e-07	7.744e-05	2.1904e-06	2.1609e-06	8.281e-07
18.2	0.07911	0.08342	0.03909	0.04761	0.051	0.05922	0.03873	0.02861		0.0628	0.0697	0.0552	0.0464	0.0419	0.053	0.0463	0.0261		0.01631	0.01372	-0.01611	0.00121	0.0091	0.00622	-0.00757	0.00251		0.000266016	0.000188238	0.000259532	1.4641e-06	8.281e-05	3.86884e-05	5.73049e-05	6.3001e-06
18.4	0.07806	0.07852	0.03529	0.04041	0.0569	0.05532	0.04853	0.02506		0.0618	0.0686	0.0542	0.046	0.0414	0.0525	0.0459	0.026		0.01626	0.00992	-0.01891	-0.00559	0.0155	0.00282	0.00263	-0.00094		0.000264388	9.84064e-05	0.000357588	3.12481e-05	0.00024025	7.9524e-06	6.9169e-06	8.836e-07
18.6	0.07841	0.07867	0.03644	0.05411	0.04695	0.05227	0.04578	0.02576		0.0616	0.0673	0.0534	0.0455	0.041	0.052	0.0455	0.0259		0.01681	0.01137	-0.01696	0.00861	0.00595	0.00027	0.00028	-0.00014		0.000282576	0.000129277	0.000287642	7.41321e-05	3.54025e-05	7.29e-08	7.84e-08	1.96e-08
18.8	0.08076	0.08132	0.03479	0.04241	0.05105	0.05247	0.04353	0.02801		0.0616	0.0666	0.0529	0.045	0.0408	0.0514	0.0451	0.0258		0.01916	0.01472	-0.01811	-0.00259	0.01025	0.00107	-0.00157	0.00221		0.000367106	0.000216678	0.000327972	6.7081e-06	0.000105062	1.1449e-06	2.4649e-06	4.8841e-06
19	0.07706	0.08272	0.03654	0.04636	0.0543	0.06187	0.04563	0.02926		0.0622	0.0661	0.0528	0.0444	0.0403	0.051	0.0447	0.0257		0.01486	0.01662	-0.01626	0.00196	0.014	0.01087	0.00093	0.00356		0.00022082	0.000276224	0.000264388	3.8416e-06	0.000196	0.000118157	8.649e-07	1.26736e-05
19.2	0.07726	0.07862	0.03274	0.04636	0.0486	0.06807	0.05043	0.02821		0.0622	0.0652	0.0526	0.044	0.04	0.0506	0.0442	0.0255		0.01506	0.01342	-0.01986	0.00236	0.0086	0.01747	0.00623	0.00271		0.000226804	0.000180096	0.00039442	5.5696e-06	7.396e-05	0.000305201	3.88129e-05	7.3441e-06
19.4	0.07906	0.07647	0.03329	0.03971	0.0493	0.05462	0.04203	0.02636		0.0621	0.0637	0.0525	0.0439	0.0398	0.0504	0.0437	0.0253		0.01696	0.01277	-0.01921	-0.00419	0.0095	0.00422	-0.00167	0.00106		0.000287642	0.000163073	0.000369024	1.75561e-05	9.025e-05	1.78084e-05	2.7889e-06	1.1236e-06
19.6	0.07561	0.08287	0.03539	0.04016	0.054	0.04997	0.04878	0.02656		0.0615	0.0629	0.0524	0.044	0.0398	0.0503	0.0434	0.0251		0.01411	0.01997	-0.01701	-0.00384	0.0142	-0.00033	0.00538	0.00146		0.000199092	0.000398801	0.00028934	1.47456e-05	0.00020164	1.089e-07	2.89444e-05	2.1316e-06
19.8	0.06921	0.08357	0.03439	0.05011	0.05205	0.05162	0.03913	0.02651		0.0609	0.0625	0.0521	0.0439	0.0398	0.0502	0.0433	0.025		0.00831	0.02107	-0.01771	0.00621	0.01225	0.00142	-0.00417	0.00151		6.90561e-05	0.000443945	0.000313644	3.85641e-05	0.000150062	2.0164e-06	1.73889e-05	2.2801e-06
20	0.07251	0.07517	0.03359	0.04581	0.0475	0.06012	0.04643	0.02841		0.0601	0.0615	0.0518	0.0435	0.0397	0.0498	0.0431	0.0251		0.01241	0.01367	-0.01821	0.00231	0.0078	0.01032	0.00333	0.00331		0.000154008	0.000186869	0.000331604	5.3361e-06	6.084e-05	0.000106502	1.10889e-05	1.09561e-05
20.2	0.07461	0.07322	0.03374	0.04361	0.04805	0.05912	0.04088	0.02961		0.0598	0.0605	0.0515	0.0431	0.0393	0.0492	0.0429	0.0251		0.01481	0.01272	-0.01776	0.00051	0.00875	0.00992	-0.00202	0.00451		0.000219336	0.000161798	0.000315418	2.601e-07	7.65625e-05	9.84064e-05	4.0804e-06	2.03401e-05
20.4	0.07411	0.07272	0.03259	0.04481	0.04695	0.05577	0.04968	0.02836		0.0597	0.0597	0.0512	0.0427	0.039	0.0489	0.0425	0.025		0.01441	0.01302	-0.01861	0.00211	0.00795	0.00687	0.00718	0.00336		0.000207648	0.00016952	0.000346332	4.4521e-06	6.32025e-05	4.71969e-05	5.15524e-05	1.12896e-05
20.6	0.07051	0.06922	0.03459	0.04176	0.0447	0.05437	0.04268	0.02691		0.0593	0.0595	0.0508	0.0427	0.0389	0.0486	0.0422	0.0249		0.01121	0.00972	-0.01621	-0.00094	0.0058	0.00577	0.00048	0.00201		0.000125664	9.44784e-05	0.000262764	8.836e-07	3.364e-05	3.32929e-05	2.304e-07	4.0401e-06
20.8	0.07006	0.07247	0.03779	0.04531	0.04605	0.05012	0.03968	0.02541		0.0588	0.0605	0.0508	0.0426	0.0388	0.0482	0.0421	0.0249		0.01126	0.01197	-0.01301	0.00271	0.00725	0.00192	-0.00242	0.00051		0.000126788	0.000143281	0.00016926	7.3441e-06	5.25625e-05	3.6864e-06	5.8564e-06	2.601e-07
21	0.07141	0.06942	0.03589	0.04281	0.04915	0.04652	0.04328	0.02396		0.0587	0.0617	0.0512	0.0425	0.0386	0.0478	0.042	0.0249		0.01271	0.00772	-0.01531	0.00031	0.01055	-0.00128	0.00128	-0.00094		0.000161544	5.95984e-05	0.000234396	9.61e-08	0.000111302	1.6384e-06	1.6384e-06	8.836e-07
21.2	0.06961	0.07017	0.03404	0.04411	0.0502	0.05617	0.03663	0.02631		0.0587	0.0618	0.0513	0.0423	0.0383	0.0478	0.0418	0.0248		0.01091	0.00837	-0.01726	0.00181	0.0119	0.00837	-0.00517	0.00151		0.000119028	7.00569e-05	0.000297908	3.2761e-06	0.00014161	7.00569e-05	2.67289e-05	2.2801e-06
21.4	0.06981	0.07657	0.03364	0.03941	0.05025	0.05207	0.04488	0.02836		0.0586	0.0616	0.0511	0.0423	0.038	0.048	0.0416	0.0247		0.01121	0.01497	-0.01746	-0.00289	0.01225	0.00407	0.00328	0.00366		0.000125664	0.000224101	0.000304852	8.3521e-06	0.000150063	1.65649e-05	1.07584e-05	1.33956e-05
21.6	0.07291	0.08447	0.03209	0.04501	0.04885	0.04987	0.04598	0.02801		0.0583	0.0619	0.0511	0.0425	0.0379	0.0482	0.0416	0.0245		0.01461	0.02257	-0.01901	0.00251	0.01095	0.00167	0.00438	0.00351		0.000213452	0.000509405	0.00036138	6.3001e-06	0.000119902	2.7889e-06	1.91844e-05	1.23201e-05
21.8	0.06981	0.07972	0.03409	0.04036	0.0446	0.05502	0.04103	0.02611		0.058	0.0621	0.0511	0.0425	0.0379	0.0481	0.0416	0.0243		0.01181	0.01762	-0.01701	-0.00214	0.0067	0.00692	-0.00057	0.00181		0.000139476	0.000310464	0.00028934	4.5796e-06	4.489e-05	4.78864e-05	3.249e-07	3.2761e-06
22	0.06906	0.07917	0.03089	0.04221	0.04585	0.05482	0.04388	0.02666		0.0579	0.0621	0.0511	0.0422	0.0378	0.0479	0.0417	0.0242		0.01116	0.01707	-0.02021	1e-05	0.00805	0.00692	0.00218	0.00246		0.000124546	0.000291385	0.000408444	1e-10	6.48025e-05	4.78864e-05	4.7524e-06	6.0516e-06
22.2	0.06761	0.07577	0.03069	0.03986	0.0501	0.05122	0.03768	0.02606		0.0584	0.0632	0.0509	0.0421	0.0376	0.0478	0.0417	0.0242		0.00921	0.01257	-0.02021	-0.00224	0.0125	0.00342	-0.00402	0.00186		8.48241e-05	0.000158005	0.000408444	5.0176e-06	0.00015625	1.16964e-05	1.61604e-05	3.4596e-06
22.4	0.07041	0.07037	0.03219	0.04101	0.0436	0.04952	0.04458	0.03166		0.0595	0.0646	0.0511	0.042	0.0375	0.0477	0.0417	0.0242		0.01091	0.00577	-0.01891	-0.00099	0.0061	0.00182	0.00288	0.00746		0.000119028	3.32929e-05	0.000357588	9.801e-07	3.721e-05	3.3124e-06	8.2944e-06	5.56516e-05
22.6	0.06881	0.07157	0.03089	0.04486	0.04545	0.05312	0.03978	0.02636		0.0603	0.0653	0.0516	0.0421	0.0376	0.0477	0.0418	0.0241		0.00851	0.00627	-0.02071	0.00276	0.00785	0.00542	-0.00202	0.00226		7.24201e-05	3.93129e-05	0.000428904	7.6176e-06	6.16225e-05	2.93764e-05	4.0804e-06	5.1076e-06
22.8	0.06726	0.07132	0.02999	0.03686	0.0454	0.05347	0.04093	0.02656		0.0607	0.0653	0.0522	0.0424	0.0379	0.0479	0.0419	0.0241		0.00656	0.00602	-0.02221	-0.00554	0.0075	0.00557	-0.00097	0.00246		4.30336e-05	3.62404e-05	0.000493284	3.06916e-05	5.625e-05	3.10249e-05	9.409e-07	6.0516e-06
23	0.06541	0.07512	0.03029	0.04761	0.0474	0.05477	0.03948	0.02391		0.0603	0.0649	0.0526	0.043	0.0382	0.0486	0.0421	0.0242		0.00511	0.01022	-0.02231	0.00461	0.0092	0.00617	-0.00262	-0.00029		2.61121e-05	0.000104448	0.000497736	2.12521e-05	8.464e-05	3.80689e-05	6.8644e-06	8.41e-08
23.2	0.06816	0.07192	0.03129	0.03671	0.0513	0.04967	0.04133	0.02721		0.0593	0.0648	0.0523	0.0435	0.0387	0.0494	0.0425	0.0243		0.00886	0.00712	-0.02101	-0.00679	0.0126	0.00027	-0.00117	0.00291		7.84996e-05	5.06944e-05	0.00044142	4.61041e-05	0.00015876	7.29e-08	1.3689e-06	8.4681e-06
23.4	0.06706	0.07177	0.03264	0.04291	0.04185	0.05122	0.04348	0.02741		0.0586	0.0666	0.0518	0.0434	0.0388	0.0495	0.043	0.0244		0.00846	0.00517	-0.01916	-0.00049	0.00305	0.00172	0.00048	0.00301		7.15716e-05	2.67289e-05	0.000367106	2.401e-07	9.3025e-06	2.9584e-06	2.304e-07	9.0601e-06
23.6	0.06556	0.07472	0.03154	0.04106	0.04105	0.04547	0.03843	0.02836		0.0596	0.0681	0.0521	0.0429	0.0385	0.0491	0.043	0.0246		0.00596	0.00662	-0.02056	-0.00184	0.00255	-0.00363	-0.00457	0.00376		3.55216e-05	4.38244e-05	0.000422714	3.3856e-06	6.5025e-06	1.31769e-05	2.08849e-05	1.41376e-05
23.8	0.06931	0.07867	0.03239	0.03876	0.0415	0.04672	0.04058	0.02721		0.0609	0.0685	0.0525	0.0422	0.0381	0.0486	0.0426	0.0246		0.00841	0.01017	-0.02011	-0.00344	0.0034	-0.00188	-0.00202	0.00261		7.07281e-05	0.000103429	0.000404412	1.18336e-05	1.156e-05	3.5344e-06	4.0804e-06	6.8121e-06
24	0.06516	0.07277	0.03154	0.04006	0.04555	0.04922	0.03828	0.02461		0.0616	0.0684	0.0525	0.0424	0.0377	0.0488	0.042	0.0245		0.00356	0.00437	-0.02096	-0.00234	0.00785	0.00042	-0.00372	0.00011		1.26736e-05	1.90969e-05	0.000439322	5.4756e-06	6.16225e-05	1.764e-07	1.38384e-05	1.21e-08
24.2	0.06541	0.06802	0.03074	0.03906	0.0509	0.04892	0.04143	0.02436		0.0617	0.0682	0.0529	0.0432	0.0382	0.0495	0.0419	0.0242		0.00371	-0.00018	-0.02216	-0.00414	0.0127	-0.00058	-0.00047	0.00016		1.37641e-05	3.24e-08	0.000491066	1.71396e-05	0.00016129	3.364e-07	2.209e-07	2.56e-08
24.4	0.06706	0.07067	0.03139	0.03961	0.04015	0.04947	0.04038	0.02646		0.0612	0.068	0.0532	0.044	0.0391	0.0499	0.0424	0.0241		0.00586	0.00267	-0.02181	-0.00439	0.00105	-0.00043	-0.00202	0.00236		3.43396e-05	7.1289e-06	0.000475676	1.92721e-05	1.1025e-06	1.849e-07	4.0804e-06	5.5696e-06
24.6	0.06921	0.06927	0.03174	0.04081	0.04155	0.04947	0.03693	0.02791		0.0603	0.0682	0.0534	0.0441	0.0395	0.05	0.0432	0.0244		0.00891	0.00107	-0.02166	-0.00329	0.00205	-0.00053	-0.00627	0.00351		7.93881e-05	1.1449e-06	0.000469156	1.08241e-05	4.2025e-06	2.809e-07	3.93129e-05	1.23201e-05
24.8	0.06461	0.07117	0.03129	0.03836	0.03905	0.04907	0.04058	0.02486		0.0595	0.0681	0.0532	0.044	0.0393	0.0502	0.0436	0.0249		0.00511	0.00307	-0.02191	-0.00564	-0.00025	-0.00113	-0.00302	-4e-05		2.61121e-05	9.4249e-06	0.000480048	3.18096e-05	6.25e-08	1.2769e-06	9.1204e-06	1.6e-09
25	0.06586	0.06962	0.03109	0.03606	0.04335	0.04432	0.04208	0.02516		0.0591	0.0674	0.0528	0.0436	0.0387	0.0502	0.0437	0.025		0.00676	0.00222	-0.02171	-0.00754	0.00465	-0.00588	-0.00162	0.00016		4.56976e-05	4.9284e-06	0.000471324	5.68516e-05	2.16225e-05	3.45744e-05	2.6244e-06	2.56e-08
25.2	0.06271	0.06442	0.03309	0.03996	0.04475	0.04727	0.03873	0.02496		0.0592	0.0664	0.0522	0.0432	0.0382	0.05	0.0435	0.0249		0.00351	-0.00198	-0.01911	-0.00324	0.00655	-0.00273	-0.00477	6e-05		1.23201e-05	3.9204e-06	0.000365192	1.04976e-05	4.29025e-05	7.4529e-06	2.27529e-05	3.6e-09
25.4	0.06366	0.06572	0.03154	0.03616	0.0414	0.05037	0.03878	0.02496		0.0592	0.0654	0.0516	0.043	0.0382	0.0497	0.043	0.0246		0.00446	0.00032	-0.02006	-0.00684	0.0032	0.00067	-0.00422	0.00036		1.98916e-05	1.024e-07	0.000402404	4.67856e-05	1.024e-05	4.489e-07	1.78084e-05	1.296e-07
25.6	0.06291	0.06462	0.03019	0.03946	0.04295	0.04717	0.04038	0.02716		0.0589	0.0645	0.0513	0.0431	0.0384	0.0493	0.0429	0.0245		0.00401	0.00012	-0.02111	-0.00364	0.00455	-0.00213	-0.00252	0.00266		1.60801e-05	1.44e-08	0.000445632	1.32496e-05	2.07025e-05	4.5369e-06	6.3504e-06	7.0756e-06
25.8	0.06586	0.06857	0.03134	0.03446	0.0444	0.04312	0.03753	0.02371		0.0586	0.064	0.0515	0.0429	0.0385	0.0489	0.0428	0.0245		0.00726	0.00457	-0.02016	-0.00844	0.0059	-0.00578	-0.00527	-0.00079		5.27076e-05	2.08849e-05	0.000406426	7.12336e-05	3.481e-05	3.34084e-05	2.77729e-05	6.241e-07
26	0.06616	0.06957	0.03199	0.03601	0.0384	0.04022	0.03778	0.02631		0.0578	0.0645	0.0518	0.0428	0.0384	0.0486	0.0427	0.0244		0.00836	0.00507	-0.01981	-0.00679	0	-0.00838	-0.00492	0.00191		6.98896e-05	2.57049e-05	0.000392436	4.61041e-05	0	7.02244e-05	2.42064e-05	3.6481e-06
26.2	0.06071	0.06967	0.03084	0.03621	0.03635	0.04492	0.03953	0.02496		0.0565	0.0649	0.0519	0.0429	0.0383	0.0485	0.0426	0.0243		0.00421	0.00477	-0.02106	-0.00669	-0.00195	-0.00358	-0.00307	0.00066		1.77241e-05	2.27529e-05	0.000443524	4.47561e-05	3.8025e-06	1.28164e-05	9.4249e-06	4.356e-07
26.4	0.06276	0.07107	0.03059	0.03476	0.0376	0.04987	0.03623	0.02441		0.0554	0.0641	0.0517	0.0429	0.0381	0.0484	0.0427	0.0242		0.00736	0.00697	-0.02111	-0.00814	-0.0005	0.00147	-0.00647	0.00021		5.41696e-05	4.85809e-05	0.000445632	6.62596e-05	2.5e-07	2.1609e-06	4.18609e-05	4.41e-08
26.6	0.06461	0.06337	0.03094	0.03766	0.0405	0.04397	0.03733	0.02451		0.0545	0.0632	0.0511	0.0428	0.0378	0.0484	0.0426	0.0241		0.01011	0.00017	-0.02016	-0.00514	0.0027	-0.00443	-0.00527	0.00041		0.000102212	2.89e-08	0.000406426	2.64196e-05	7.29e-06	1.96249e-05	2.77729e-05	1.681e-07
26.8	0.06291	0.06372	0.02989	0.03656	0.047	0.04287	0.03568	0.02191		0.0539	0.0623	0.0506	0.0421	0.0372	0.0482	0.0424	0.024		0.00901	0.00142	-0.02071	-0.00554	0.0098	-0.00533	-0.00672	-0.00209		8.11801e-05	2.0164e-06	0.000428904	3.06916e-05	9.604e-05	2.84089e-05	4.51584e-05	4.3681e-06
27	0.05966	0.06822	0.03214	0.03841	0.0413	0.04377	0.03543	0.02221		0.0533	0.0615	0.0499	0.0412	0.0365	0.0476	0.042	0.0239		0.00636	0.00672	-0.01776	-0.00279	0.0048	-0.00383	-0.00657	-0.00169		4.04496e-05	4.51584e-05	0.000315418	7.7841e-06	2.304e-05	1.46689e-05	4.31649e-05	2.8561e-06
27.2	0.06446	0.06877	0.02984	0.03771	0.0394	0.04657	0.03998	0.02356		0.0528	0.0609	0.0492	0.0405	0.036	0.0469	0.0413	0.0236		0.01166	0.00787	-0.01936	-0.00279	0.0034	-0.00033	-0.00132	-4e-05		0.000135956	6.19369e-05	0.00037481	7.7841e-06	1.156e-05	1.089e-07	1.7424e-06	1.6e-09
27.4	0.06561	0.06682	0.03174	0.03806	0.03765	0.04262	0.03428	0.02361		0.0525	0.0606	0.0486	0.0401	0.0356	0.0463	0.0407	0.0232		0.01311	0.00622	-0.01686	-0.00204	0.00205	-0.00368	-0.00642	0.00041		0.000171872	3.86884e-05	0.00028426	4.1616e-06	4.2025e-06	1.35424e-05	4.12164e-05	1.681e-07
27.6	0.06211	0.07087	0.03374	0.03861	0.0442	0.04192	0.04008	0.02441		0.0522	0.0603	0.0484	0.0396	0.0354	0.0458	0.0401	0.0228		0.00991	0.01057	-0.01466	-0.00099	0.0088	-0.00388	-2e-05	0.00161		9.82081e-05	0.000111725	0.000214916	9.801e-07	7.744e-05	1.50544e-05	4e-10	2.5921e-06
27.8	0.06216	0.06657	0.02934	0.03636	0.0425	0.04047	0.03368	0.02471		0.052	0.0598	0.0484	0.0392	0.0351	0.0456	0.0397	0.0225		0.01016	0.00677	-0.01906	-0.00284	0.0074	-0.00513	-0.00602	0.00221		0.000103226	4.58329e-05	0.000363284	8.0656e-06	5.476e-05	2.63169e-05	3.62404e-05	4.8841e-06
28	0.06066	0.06622	0.03049	0.03886	0.04095	0.04487	0.03913	0.02276		0.0521	0.0593	0.0483	0.0389	0.0347	0.0453	0.0394	0.0223		0.00856	0.00692	-0.01781	-4e-05	0.00625	-0.00043	-0.00027	0.00046		7.32736e-05	4.78864e-05	0.000317196	1.6e-09	3.90625e-05	1.849e-07	7.29e-08	2.116e-07
28.2	0.06221	0.06537	0.03129	0.03481	0.03705	0.04502	0.03293	0.02611		0.0522	0.0587	0.0481	0.0388	0.0344	0.0451	0.0392	0.0221		0.01001	0.00667	-0.01681	-0.00399	0.00265	-8e-05	-0.00627	0.00401		0.0001002	4.44889e-05	0.000282576	1.59201e-05	7.0225e-06	6.4e-09	3.93129e-05	1.60801e-05
28.4	0.06071	0.06457	0.03234	0.03716	0.03525	0.04107	0.04073	0.02276		0.052	0.0582	0.0478	0.0387	0.0342	0.0448	0.039	0.0219		0.00871	0.00637	-0.01546	-0.00154	0.00105	-0.00373	0.00173	0.00086		7.58641e-05	4.05769e-05	0.000239012	2.3716e-06	1.1025e-06	1.39129e-05	2.9929e-06	7.396e-07
28.6	0.06111	0.06277	0.03239	0.03946	0.0409	0.04297	0.03578	0.02521		0.0514	0.0581	0.0475	0.0387	0.0342	0.0446	0.0388	0.0217		0.00971	0.00467	-0.01511	0.00076	0.0067	-0.00163	-0.00302	0.00351		9.42841e-05	2.18089e-05	0.000228312	5.776e-07	4.489e-05	2.6569e-06	9.1204e-06	1.23201e-05
28.8	0.06111	0.05982	0.02999	0.03326	0.0371	0.04502	0.03608	0.02321		0.0508	0.0581	0.0473	0.0386	0.0342	0.0443	0.0387	0.0217		0.01031	0.00172	-0.01731	-0.00534	0.0029	0.00072	-0.00262	0.00151		0.000106296	2.9584e-06	0.000299636	2.85156e-05	8.41e-06	5.184e-07	6.8644e-06	2.2801e-06
29	0.06246	0.06117	0.02999	0.03876	0.03765	0.04407	0.03348	0.02311		0.0503	0.0578	0.0471	0.0385	0.0341	0.044	0.0386	0.0216		0.01216	0.00337	-0.01711	0.00026	0.00355	7e-05	-0.00512	0.00151		0.000147866	1.13569e-05	0.000292752	6.76e-08	1.26025e-05	4.9e-09	2.62144e-05	2.2801e-06
29.2	0.05706	0.06727	0.03174	0.03406	0.0342	0.04207	0.03653	0.02496		0.05	0.0571	0.0467	0.0383	0.0338	0.0437	0.0385	0.0216		0.00706	0.01017	-0.01496	-0.00424	0.0004	-0.00163	-0.00197	0.00336		4.98436e-05	0.000103429	0.000223802	1.79776e-05	1.6e-07	2.6569e-06	3.8809e-06	1.12896e-05
29.4	0.06121	0.06727	0.02949	0.03786	0.0358	0.04107	0.03613	0.02216		0.0496	0.0567	0.0464	0.0379	0.0334	0.0435	0.0383	0.0215		0.01161	0.01057	-0.01691	-4e-05	0.0024	-0.00243	-0.00217	0.00066		0.000134792	0.000111725	0.000285948	1.6e-09	5.76e-06	5.9049e-06	4.7089e-06	4.356e-07
29.6	0.05911	0.06512	0.03379	0.03436	0.0394	0.04022	0.03458	0.02436		0.0493	0.0568	0.0459	0.0375	0.033	0.0431	0.038	0.0214		0.00981	0.00832	-0.01211	-0.00314	0.0064	-0.00288	-0.00342	0.00296		9.62361e-05	6.92224e-05	0.000146652	9.8596e-06	4.096e-05	8.2944e-06	1.16964e-05	8.7616e-06
29.8	0.06011	0.06682	0.03284	0.03486	0.0406	0.04437	0.03343	0.02131		0.049	0.0569	0.0455	0.0371	0.0326	0.0428	0.0376	0.0212		0.01111	0.00992	-0.01266	-0.00224	0.008	0.00157	-0.00417	0.00011		0.000123432	9.84064e-05	0.000160276	5.0176e-06	6.4e-05	2.4649e-06	1.73889e-05	1.21e-08
30	0.05966	0.07052	0.02889	0.03951	0.04505	0.04197	0.03393	0.02361		0.0489	0.0564	0.0454	0.0368	0.0324	0.0425	0.0373	0.021		0.01076	0.01412	-0.01651	0.00271	0.01265	-0.00053	-0.00337	0.00261		0.000115778	0.000199374	0.00027258	7.3441e-06	0.000160023	2.809e-07	1.13569e-05	6.8121e-06
30.2	0.06161	0.07612	0.02794	0.03181	0.04165	0.03877	0.03548	0.02586		0.0489	0.056	0.0451	0.0366	0.0323	0.0424	0.037	0.0209		0.01271	0.02012	-0.01716	-0.00479	0.00935	-0.00363	-0.00152	0.00496		0.000161544	0.000404814	0.000294466	2.29441e-05	8.74225e-05	1.31769e-05	2.3104e-06	2.46016e-05
30.4	0.06101	0.06772	0.03264	0.03846	0.03925	0.04107	0.03428	0.02436		0.0486	0.0564	0.0447	0.0364	0.0321	0.0424	0.0368	0.0208		0.01241	0.01132	-0.01206	0.00206	0.00715	-0.00133	-0.00252	0.00356		0.000154008	0.000128142	0.000145444	4.2436e-06	5.11225e-05	1.7689e-06	6.3504e-06	1.26736e-05
30.6	0.05826	0.07232	0.03029	0.03391	0.041	0.04182	0.04083	0.02356		0.0482	0.0561	0.0446	0.0363	0.0319	0.0423	0.0367	0.0207		0.01006	0.01622	-0.01431	-0.00239	0.0091	-0.00048	0.00413	0.00286		0.000101204	0.000263088	0.000204776	5.7121e-06	8.281e-05	2.304e-07	1.70569e-05	8.1796e-06
30.8	0.06001	0.07132	0.03089	0.03396	0.03875	0.04072	0.02983	0.02346		0.0482	0.0552	0.0447	0.0361	0.0318	0.0421	0.0366	0.0206		0.01181	0.01612	-0.01381	-0.00214	0.00695	-0.00138	-0.00677	0.00286		0.000139476	0.000259854	0.000190716	4.5796e-06	4.83025e-05	1.9044e-06	4.58329e-05	8.1796e-06
31	0.05866	0.07052	0.02904	0.03381	0.03685	0.04342	0.03828	0.02376		0.0482	0.0552	0.0442	0.036	0.0317	0.042	0.0364	0.0205		0.01046	0.01532	-0.01516	-0.00219	0.00515	0.00142	0.00188	0.00326		0.000109412	0.000234702	0.000229826	4.7961e-06	2.65225e-05	2.0164e-06	3.5344e-06	1.06276e-05
31.2	0.05781	0.07362	0.02839	0.03061	0.0382	0.04752	0.02913	0.02351		0.0477	0.0555	0.0438	0.0359	0.0316	0.042	0.0363	0.0204		0.01011	0.01812	-0.01541	-0.00529	0.0066	0.00552	-0.00717	0.00311		0.000102212	0.000328334	0.000237468	2.79841e-05	4.356e-05	3.04704e-05	5.14089e-05	9.6721e-06
31.4	0.05936	0.07617	0.02894	0.03806	0.0407	0.04087	0.03713	0.02391		0.0474	0.0556	0.0438	0.0357	0.0314	0.0417	0.0362	0.0204		0.01196	0.02057	-0.01486	0.00236	0.0093	-0.00083	0.00093	0.00351		0.000143042	0.000423125	0.00022082	5.5696e-06	8.649e-05	6.889e-07	8.649e-07	1.23201e-05
31.6	0.05861	0.06992	0.02784	0.03126	0.04035	0.03712	0.03233	0.02171		0.0475	0.0552	0.0438	0.0355	0.0313	0.0413	0.0361	0.0203		0.01111	0.01472	-0.01596	-0.00424	0.00905	-0.00418	-0.00377	0.00141		0.000123432	0.000216678	0.000254722	1.79776e-05	8.19025e-05	1.74724e-05	1.42129e-05	1.9881e-06
31.8	0.05646	0.07137	0.02949	0.03446	0.04045	0.03722	0.02918	0.02281		0.0474	0.055	0.0436	0.0354	0.0311	0.0413	0.0358	0.0202		0.00906	0.01637	-0.01411	-0.00094	0.00935	-0.00408	-0.00662	0.00261		8.20836e-05	0.000267977	0.000199092	8.836e-07	8.74225e-05	1.66464e-05	4.38244e-05	6.8121e-06
32	0.05936	0.07292	0.02984	0.03631	0.03635	0.04052	0.03813	0.02256		0.0471	0.0549	0.0434	0.0352	0.0309	0.0413	0.0357	0.0202		0.01226	0.01802	-0.01356	0.00111	0.00545	-0.00078	0.00243	0.00236		0.000150308	0.00032472	0.000183874	1.2321e-06	2.97025e-05	6.084e-07	5.9049e-06	5.5696e-06
32.2	0.05726	0.06657	0.02979	0.03276	0.03975	0.04292	0.03138	0.02606		0.0468	0.0546	0.0433	0.0351	0.0308	0.0412	0.0356	0.0201		0.01046	0.01197	-0.01351	-0.00234	0.00895	0.00172	-0.00422	0.00596		0.000109412	0.000143281	0.00018252	5.4756e-06	8.01025e-05	2.9584e-06	1.78084e-05	3.55216e-05
32.4	0.05766	0.06392	0.02984	0.03556	0.0365	0.04242	0.03693	0.02411		0.0465	0.0543	0.043	0.035	0.0307	0.041	0.0355	0.0199		0.01116	0.00962	-0.01316	0.00056	0.0058	0.00142	0.00143	0.00421		0.000124546	9.25444e-05	0.000173186	3.136e-07	3.364e-05	2.0164e-06	2.0449e-06	1.77241e-05
32.6	0.05781	0.06422	0.03064	0.03301	0.039	0.03887	0.03263	0.02371		0.0462	0.054	0.0427	0.0348	0.0306	0.0409	0.0354	0.0199		0.01161	0.01022	-0.01206	-0.00179	0.0084	-0.00203	-0.00277	0.00381		0.000134792	0.000104448	0.000145444	3.2041e-06	7.056e-05	4.1209e-06	7.6729e-06	1.45161e-05
32.8	0.05606	0.06102	0.03024	0.03281	0.0426	0.03952	0.03323	0.02281		0.0459	0.0537	0.0425	0.0345	0.0304	0.0407	0.0352	0.0198		0.01016	0.00732	-0.01226	-0.00169	0.0122	-0.00118	-0.00197	0.00301		0.000103226	5.35824e-05	0.000150308	2.8561e-06	0.00014884	1.3924e-06	3.8809e-06	9.0601e-06
33	0.05911	0.05952	0.03084	0.03396	0.0392	0.03977	0.03233	0.02136		0.0457	0.0535	0.0423	0.0343	0.0302	0.0404	0.0351	0.0198		0.01341	0.00602	-0.01146	-0.00034	0.009	-0.00063	-0.00277	0.00156		0.000179828	3.62404e-05	0.000131332	1.156e-07	8.1e-05	3.969e-07	7.6729e-06	2.4336e-06
33.2	0.05706	0.05987	0.02869	0.03316	0.0393	0.04342	0.03408	0.02596		0.0454	0.0533	0.0421	0.034	0.03	0.0402	0.0349	0.0197		0.01166	0.00657	-0.01341	-0.00084	0.0093	0.00322	-0.00082	0.00626		0.000135956	4.31649e-05	0.000179828	7.056e-07	8.649e-05	1.03684e-05	6.724e-07	3.91876e-05
33.4	0.05566	0.05787	0.02819	0.03431	0.0389	0.03677	0.03443	0.02316		0.0452	0.0532	0.0419	0.0338	0.0298	0.0401	0.0347	0.0196		0.01046	0.00467	-0.01371	0.00051	0.0091	-0.00333	-0.00027	0.00356		0.000109412	2.18089e-05	0.000187964	2.601e-07	8.281e-05	1.10889e-05	7.29e-08	1.26736e-05
33.6	0.05606	0.05802	0.02864	0.02896	0.0377	0.04067	0.03203	0.02311		0.0451	0.0531	0.0418	0.0336	0.0296	0.0399	0.0345	0.0195		0.01096	0.00492	-0.01316	-0.00464	0.0081	0.00077	-0.00247	0.00361		0.000120122	2.42064e-05	0.000173186	2.15296e-05	6.561e-05	5.929e-07	6.1009e-06	1.30321e-05
33.8	0.05616	0.05917	0.02969	0.03311	0.0391	0.03682	0.03008	0.02276		0.045	0.0529	0.0417	0.0335	0.0295	0.0398	0.0343	0.0193		0.01116	0.00627	-0.01201	-0.00039	0.0096	-0.00298	-0.00422	0.00346		0.000124546	3.93129e-05	0.00014424	1.521e-07	9.216e-05	8.8804e-06	1.78084e-05	1.19716e-05
34	0.05671	0.06047	0.03054	0.03286	0.0429	0.03922	0.03838	0.02316		0.0448	0.0526	0.0415	0.0334	0.0293	0.0397	0.0342	0.0192		0.01191	0.00787	-0.01096	-0.00054	0.0136	-0.00048	0.00418	0.00396		0.000141848	6.19369e-05	0.000120122	2.916e-07	0.00018496	2.304e-07	1.74724e-05	1.56816e-05
34.2	0.05486	0.05972	0.02864	0.03146	0.0395	0.03892	0.02863	0.02171		0.0446	0.0523	0.0414	0.0333	0.0292	0.0396	0.0341	0.0192		0.01026	0.00742	-0.01276	-0.00184	0.0103	-0.00068	-0.00547	0.00251		0.000105268	5.50564e-05	0.000162818	3.3856e-06	0.00010609	4.624e-07	2.99209e-05	6.3001e-06
34.4	0.05591	0.05852	0.02769	0.03331	0.0366	0.03942	0.03468	0.02446		0.0444	0.052	0.0412	0.0332	0.0291	0.0394	0.034	0.0191		0.01151	0.00652	-0.01351	0.00011	0.0075	2e-05	0.00068	0.00536		0.00013248	4.25104e-05	0.00018252	1.21e-08	5.625e-05	4e-10	4.624e-07	2.87296e-05
34.6	0.05341	0.05747	0.02889	0.03051	0.03725	0.04417	0.03183	0.02241		0.0442	0.0516	0.0411	0.033	0.029	0.0393	0.0339	0.019		0.00921	0.00587	-0.01221	-0.00249	0.00825	0.00487	-0.00207	0.00341		8.48241e-05	3.44569e-05	0.000149084	6.2001e-06	6.80625e-05	2.37169e-05	4.2849e-06	1.16281e-05
34.8	0.05356	0.05652	0.02864	0.03361	0.0397	0.03727	0.03123	0.02036		0.0439	0.0513	0.0409	0.0329	0.0289	0.0392	0.0338	0.019		0.00966	0.00522	-0.01226	0.00071	0.0108	-0.00193	-0.00257	0.00136		9.33156e-05	2.72484e-05	0.000150308	5.041e-07	0.00011664	3.7249e-06	6.6049e-06	1.8496e-06
35	0.05476	0.05482	0.02704	0.02651	0.04025	0.03922	0.03588	0.02171		0.0437	0.0511	0.0407	0.0328	0.0288	0.039	0.0337	0.0189		0.01106	0.00372	-0.01366	-0.00629	0.01145	0.00022	0.00218	0.00281		0.000122324	1.38384e-05	0.000186596	3.95641e-05	0.000131103	4.84e-08	4.7524e-06	7.8961e-06
35.2	0.05366	0.05547	0.02954	0.03546	0.0382	0.03662	0.02703	0.02286		0.0435	0.0507	0.0405	0.0326	0.0286	0.0388	0.0335	0.0188		0.01016	0.00477	-0.01096	0.00286	0.0096	-0.00218	-0.00647	0.00406		0.000103226	2.27529e-05	0.000120122	8.1796e-06	9.216e-05	4.7524e-06	4.18609e-05	1.64836e-05
35.4	0.05456	0.05482	0.03084	0.03031	0.04155	0.03972	0.03533	0.02326		0.0433	0.0504	0.0403	0.0324	0.0285	0.0386	0.0334	0.0188		0.01126	0.00442	-0.00946	-0.00209	0.01305	0.00112	0.00193	0.00446		0.000126788	1.95364e-05	8.94916e-05	4.3681e-06	0.000170302	1.2544e-06	3.7249e-06	1.98916e-05
35.6	0.05421	0.05647	0.03009	0.03031	0.03455	0.03802	0.03248	0.02221		0.0431	0.0501	0.0401	0.0322	0.0283	0.0384	0.0332	0.0187		0.01111	0.00637	-0.01001	-0.00189	0.00625	-0.00038	-0.00072	0.00351		0.000123432	4.05769e-05	0.0001002	3.5721e-06	3.90625e-05	1.444e-07	5.184e-07	1.23201e-05
35.8	0.05401	0.05667	0.02969	0.03036	0.0313	0.04117	0.03283	0.01891		0.0429	0.0497	0.04	0.032	0.0282	0.0383	0.0331	0.0186		0.01111	0.00697	-0.01031	-0.00164	0.0031	0.00287	-0.00027	0.00031		0.000123432	4.85809e-05	0.000106296	2.6896e-06	9.61e-06	8.2369e-06	7.29e-08	9.61e-08
36	0.05351	0.05817	0.02669	0.02736	0.0355	0.04097	0.03093	0.02306		0.0427	0.0494	0.0398	0.0319	0.0281	0.0381	0.0329	0.0185		0.01081	0.00877	-0.01311	-0.00454	0.0074	0.00287	-0.00197	0.00456		0.000116856	7.69129e-05	0.000171872	2.06116e-05	5.476e-05	8.2369e-06	3.8809e-06	2.07936e-05
36.2	0.05301	0.05837	0.02724	0.03006	0.0365	0.03422	0.03173	0.02161		0.0424	0.049	0.0396	0.0317	0.0279	0.0379	0.0328	0.0184		0.01061	0.00937	-0.01236	-0.00164	0.0086	-0.00368	-0.00107	0.00321		0.000112572	8.77969e-05	0.00015277	2.6896e-06	7.396e-05	1.35424e-05	1.1449e-06	1.03041e-05
36.4	0.05176	0.05667	0.02779	0.03121	0.03755	0.03602	0.03103	0.02226		0.0421	0.0485	0.0394	0.0316	0.0278	0.0378	0.0327	0.0184		0.00966	0.00817	-0.01161	-0.00039	0.00975	-0.00178	-0.00167	0.00386		9.33156e-05	6.67489e-05	0.000134792	1.521e-07	9.50625e-05	3.1684e-06	2.7889e-06	1.48996e-05
36.6	0.05281	0.05737	0.02914	0.03061	0.03965	0.03572	0.03368	0.02046		0.0417	0.0481	0.0391	0.0314	0.0277	0.0376	0.0325	0.0183		0.01111	0.00927	-0.00996	-0.00079	0.01195	-0.00188	0.00118	0.00216		0.000123432	8.59329e-05	9.92016e-05	6.241e-07	0.000142802	3.5344e-06	1.3924e-06	4.6656e-06
36.8	0.05096	0.05397	0.02829	0.02821	0.0418	0.03792	0.02778	0.02231		0.0414	0.0477	0.0388	0.0313	0.0275	0.0374	0.0324	0.0182		0.00956	0.00627	-0.01051	-0.00309	0.0143	0.00052	-0.00462	0.00411		9.13936e-05	3.93129e-05	0.00011046	9.5481e-06	0.00020449	2.704e-07	2.13444e-05	1.68921e-05
37	0.05161	0.05692	0.03119	0.03001	0.04035	0.03852	0.03528	0.02341		0.041	0.0473	0.0386	0.031	0.0273	0.0372	0.0322	0.0182		0.01061	0.00962	-0.00741	-0.00099	0.01305	0.00132	0.00308	0.00521		0.000112572	9.25444e-05	5.49081e-05	9.801e-07	0.000170302	1.7424e-06	9.4864e-06	2.71441e-05
37.2	0.05136	0.05562	0.02674	0.02946	0.03655	0.03967	0.02833	0.02151		0.0407	0.0469	0.0383	0.0308	0.0271	0.037	0.0321	0.0181		0.01066	0.00872	-0.01156	-0.00134	0.00945	0.00267	-0.00377	0.00341		0.000113636	7.60384e-05	0.000133634	1.7956e-06	8.93025e-05	7.1289e-06	1.42129e-05	1.16281e-05
37.4	0.05211	0.05352	0.02724	0.02906	0.03165	0.04022	0.03183	0.02061		0.0404	0.0466	0.038	0.0306	0.0269	0.0368	0.0319	0.018		0.01171	0.00692	-0.01076	-0.00154	0.00475	0.00342	-7e-05	0.00261		0.000137124	4.78864e-05	0.000115778	2.3716e-06	2.25625e-05	1.16964e-05	4.9e-09	6.8121e-06
37.6	0.04886	0.05427	0.02629	0.02926	0.0303	0.03622	0.02833	0.02031		0.0402	0.0463	0.0378	0.0304	0.0267	0.0366	0.0316	0.0179		0.00866	0.00797	-0.01151	-0.00114	0.0036	-0.00038	-0.00327	0.00241		7.49956e-05	6.35209e-05	0.00013248	1.2996e-06	1.296e-05	1.444e-07	1.06929e-05	5.8081e-06
37.8	0.04936	0.05792	0.02549	0.02761	0.03255	0.04397	0.03038	0.02161		0.04	0.0461	0.0376	0.0302	0.0266	0.0363	0.0314	0.0178		0.00936	0.01182	-0.01211	-0.00259	0.00595	0.00767	-0.00102	0.00381		8.76096e-05	0.000139712	0.000146652	6.7081e-06	3.54025e-05	5.88289e-05	1.0404e-06	1.45161e-05
38	0.05146	0.05577	0.02839	0.03071	0.0358	0.03782	0.03033	0.01976		0.0397	0.046	0.0374	0.03	0.0264	0.0362	0.0312	0.0177		0.01176	0.00977	-0.00901	0.00071	0.0094	0.00162	-0.00087	0.00206		0.000138298	9.54529e-05	8.11801e-05	5.041e-07	8.836e-05	2.6244e-06	7.569e-07	4.2436e-06
38.2	0.05051	0.05482	0.02594	0.02916	0.0417	0.03412	0.02743	0.02036		0.0395	0.0458	0.0373	0.0298	0.0262	0.036	0.031	0.0176		0.01101	0.00902	-0.01136	-0.00064	0.0155	-0.00188	-0.00357	0.00276		0.00012122	8.13604e-05	0.00012905	4.096e-07	0.00024025	3.5344e-06	1.27449e-05	7.6176e-06
38.4	0.04991	0.05397	0.02804	0.03106	0.04155	0.03232	0.03133	0.02236		0.0394	0.0457	0.0371	0.0296	0.026	0.0358	0.0309	0.0175		0.01051	0.00827	-0.00906	0.00146	0.01555	-0.00348	0.00043	0.00486		0.00011046	6.83929e-05	8.20836e-05	2.1316e-06	0.000241802	1.21104e-05	1.849e-07	2.36196e-05
38.6	0.05086	0.05632	0.02604	0.02721	0.0383	0.03342	0.03173	0.02486		0.0392	0.0455	0.037	0.0294	0.0259	0.0356	0.0307	0.0174		0.01166	0.01082	-0.01096	-0.00219	0.0124	-0.00218	0.00103	0.00746		0.000135956	0.000117072	0.000120122	4.7961e-06	0.00015376	4.7524e-06	1.0609e-06	5.56516e-05
38.8	0.04966	0.05182	0.02634	0.03246	0.03655	0.03627	0.02848	0.02376		0.0391	0.0453	0.0368	0.0293	0.0257	0.0355	0.0305	0.0174		0.01056	0.00652	-0.01046	0.00316	0.01085	0.00077	-0.00202	0.00636		0.000111514	4.25104e-05	0.000109412	9.9856e-06	0.000117722	5.929e-07	4.0804e-06	4.04496e-05
39	0.04826	0.05702	0.02679	0.02681	0.0349	0.03582	0.02863	0.02281		0.0389	0.0451	0.0366	0.0291	0.0256	0.0354	0.0304	0.0173		0.00936	0.01192	-0.00981	-0.00229	0.0093	0.00042	-0.00177	0.00551		8.76096e-05	0.000142086	9.62361e-05	5.2441e-06	8.649e-05	1.764e-07	3.1329e-06	3.03601e-05
39.2	0.05046	0.05842	0.02584	0.02666	0.03575	0.03737	0.03263	0.02151		0.0388	0.0448	0.0365	0.029	0.0254	0.0352	0.0302	0.0172		0.01166	0.01362	-0.01066	-0.00234	0.01035	0.00217	0.00243	0.00431		0.000135956	0.000185504	0.000113636	5.4756e-06	0.000107122	4.7089e-06	5.9049e-06	1.85761e-05
39.4	0.05321	0.05922	0.02664	0.02796	0.0401	0.03537	0.02783	0.02031		0.0386	0.0445	0.0363	0.0288	0.0253	0.0351	0.0301	0.0171		0.01461	0.01472	-0.00966	-0.00084	0.0148	0.00027	-0.00227	0.00321		0.000213452	0.000216678	9.33156e-05	7.056e-07	0.00021904	7.29e-08	5.1529e-06	1.03041e-05
39.6	0.04871	0.06377	0.02514	0.02551	0.03565	0.03582	0.02938	0.02126		0.0384	0.0442	0.0361	0.0287	0.0252	0.035	0.03	0.017		0.01031	0.01957	-0.01096	-0.00319	0.01045	0.00082	-0.00062	0.00426		0.000106296	0.000382985	0.000120122	1.01761e-05	0.000109203	6.724e-07	3.844e-07	1.81476e-05
39.8	0.04911	0.05957	0.02679	0.03236	0.037	0.03377	0.02788	0.02091		0.0382	0.0439	0.0359	0.0285	0.0251	0.0348	0.0298	0.017		0.01091	0.01567	-0.00911	0.00386	0.0119	-0.00103	-0.00192	0.00391		0.000119028	0.000245549	8.29921e-05	1.48996e-05	0.00014161	1.0609e-06	3.6864e-06	1.52881e-05
40	0.05041	0.05472	0.02634	0.02646	0.0366	0.03282	0.02713	0.01926		0.038	0.0437	0.0357	0.0284	0.025	0.0347	0.0297	0.0169		0.01241	0.01102	-0.00936	-0.00194	0.0116	-0.00188	-0.00257	0.00236		0.000154008	0.00012144	8.76096e-05	3.7636e-06	0.00013456	3.5344e-06	6.6049e-06	5.5696e-06
40.2	0.04881	0.05652	0.02629	0.02731	0.0347	0.04232	0.02643	0.02076		0.0379	0.0435	0.0355	0.0282	0.0248	0.0345	0.0296	0.0169		0.01091	0.01302	-0.00921	-0.00089	0.0099	0.00782	-0.00317	0.00386		0.000119028	0.00016952	8.48241e-05	7.921e-07	9.801e-05	6.11524e-05	1.00489e-05	1.48996e-05
40.4	0.04841	0.05487	0.02774	0.02831	0.03295	0.03822	0.02903	0.02131		0.0378	0.0434	0.0354	0.0281	0.0247	0.0343	0.0295	0.0168		0.01061	0.01147	-0.00766	0.00021	0.00825	0.00392	-0.00047	0.00451		0.000112572	0.000131561	5.86756e-05	4.41e-08	6.80625e-05	1.53664e-05	2.209e-07	2.03401e-05
40.6	0.04766	0.05667	0.02789	0.02756	0.0367	0.03607	0.02778	0.02241		0.0377	0.0433	0.0353	0.0279	0.0246	0.0342	0.0293	0.0168		0.00996	0.01337	-0.00741	-0.00034	0.0121	0.00187	-0.00152	0.00561		9.92016e-05	0.000178757	5.49081e-05	1.156e-07	0.00014641	3.4969e-06	2.3104e-06	3.14721e-05
40.8	0.04721	0.06067	0.02794	0.03046	0.0309	0.03502	0.02973	0.02001		0.0376	0.0431	0.0352	0.0278	0.0245	0.0341	0.0292	0.0167		0.00961	0.01757	-0.00726	0.00266	0.0064	0.00092	0.00053	0.00331		9.23521e-05	0.000308705	5.27076e-05	7.0756e-06	4.096e-05	8.464e-07	2.809e-07	1.09561e-05
41	0.04751	0.05772	0.02654	0.02591	0.03615	0.03672	0.02633	0.02281		0.0375	0.0428	0.0351	0.0277	0.0244	0.034	0.0291	0.0167		0.01001	0.01492	-0.00856	-0.00179	0.01175	0.00272	-0.00277	0.00611		0.0001002	0.000222606	7.32736e-05	3.2041e-06	0.000138063	7.3984e-06	7.6729e-06	3.73321e-05
41.2	0.04621	0.05632	0.02804	0.03086	0.0345	0.03347	0.02623	0.02276		0.0373	0.0424	0.035	0.0277	0.0244	0.0339	0.029	0.0166		0.00891	0.01392	-0.00696	0.00316	0.0101	-0.00043	-0.00277	0.00616		7.93881e-05	0.000193766	4.84416e-05	9.9856e-06	0.00010201	1.849e-07	7.6729e-06	3.79456e-05
41.4	0.04901	0.05722	0.02584	0.02681	0.03525	0.03517	0.03278	0.02186		0.0371	0.042	0.0348	0.0276	0.0243	0.0338	0.029	0.0165		0.01191	0.01522	-0.00896	-0.00079	0.01095	0.00137	0.00378	0.00536		0.000141848	0.000231648	8.02816e-05	6.241e-07	0.000119902	1.8769e-06	1.42884e-05	2.87296e-05
41.6	0.04616	0.05732	0.03019	0.02941	0.037	0.03737	0.02398	0.01911		0.0368	0.0416	0.0346	0.0275	0.0242	0.0337	0.0289	0.0165		0.00936	0.01572	-0.00441	0.00191	0.0128	0.00367	-0.00492	0.00261		8.76096e-05	0.000247118	1.94481e-05	3.6481e-06	0.00016384	1.34689e-05	2.42064e-05	6.8121e-06
41.8	0.04751	0.05757	0.02759	0.02486	0.0409	0.03592	0.03008	0.02216		0.0364	0.0412	0.0343	0.0273	0.0241	0.0336	0.0288	0.0165		0.01111	0.01637	-0.00671	-0.00244	0.0168	0.00232	0.00128	0.00566		0.000123432	0.000267977	4.50241e-05	5.9536e-06	0.00028224	5.3824e-06	1.6384e-06	3.20356e-05
42	0.04651	0.05722	0.02664	0.02466	0.0368	0.03602	0.02663	0.02251		0.036	0.041	0.0341	0.0272	0.024	0.0334	0.0287	0.0164		0.01051	0.01622	-0.00746	-0.00254	0.0128	0.00262	-0.00207	0.00611		0.00011046	0.000263088	5.56516e-05	6.4516e-06	0.00016384	6.8644e-06	4.2849e-06	3.73321e-05
42.2	0.04701	0.05592	0.02599	0.02581	0.0363	0.03312	0.03088	0.02486		0.0357	0.0409	0.0338	0.0269	0.0238	0.0332	0.0285	0.0164		0.01131	0.01502	-0.00781	-0.00109	0.0125	-8e-05	0.00238	0.00846		0.000127916	0.0002256	6.09961e-05	1.1881e-06	0.00015625	6.4e-09	5.6644e-06	7.15716e-05
42.4	0.04481	0.05592	0.02489	0.02851	0.03995	0.03222	0.02598	0.02061		0.0355	0.0408	0.0336	0.0267	0.0236	0.033	0.0284	0.0163		0.00931	0.01512	-0.00871	0.00181	0.01635	-0.00078	-0.00242	0.00431		8.66761e-05	0.000228614	7.58641e-05	3.2761e-06	0.000267323	6.084e-07	5.8564e-06	1.85761e-05
42.6	0.04421	0.05387	0.02749	0.02531	0.0327	0.03582	0.02778	0.02011		0.0353	0.0407	0.0335	0.0265	0.0235	0.0328	0.0282	0.0162		0.00891	0.01317	-0.00601	-0.00119	0.0092	0.00302	-0.00042	0.00391		7.93881e-05	0.000173449	3.61201e-05	1.4161e-06	8.464e-05	9.1204e-06	1.764e-07	1.52881e-05
42.8	0.04621	0.05542	0.02629	0.02531	0.03665	0.03572	0.02648	0.01981		0.0352	0.0407	0.0333	0.0263	0.0233	0.0326	0.028	0.0161		0.01101	0.01472	-0.00701	-0.00099	0.01335	0.00312	-0.00152	0.00371		0.00012122	0.000216678	4.91401e-05	9.801e-07	0.000178223	9.7344e-06	2.3104e-06	1.37641e-05
43	0.04456	0.05572	0.02804	0.02791	0.0339	0.03392	0.02718	0.01891		0.0352	0.0404	0.0333	0.0262	0.0231	0.0325	0.0278	0.0161		0.00936	0.01532	-0.00526	0.00171	0.0108	0.00142	-0.00062	0.00281		8.76096e-05	0.000234702	2.76676e-05	2.9241e-06	0.00011664	2.0164e-06	3.844e-07	7.8961e-06
43.2	0.04536	0.05662	0.02909	0.02731	0.034	0.03707	0.02763	0.02031		0.0351	0.04	0.0332	0.0261	0.023	0.0324	0.0276	0.016		0.01026	0.01662	-0.00411	0.00121	0.011	0.00467	3e-05	0.00431		0.000105268	0.000276224	1.68921e-05	1.4641e-06	0.000121	2.18089e-05	9e-10	1.85761e-05
43.4	0.04536	0.05717	0.02584	0.02271	0.03775	0.03212	0.02333	0.01926		0.0349	0.0395	0.033	0.026	0.0228	0.0323	0.0275	0.0159		0.01046	0.01767	-0.00716	-0.00329	0.01495	-0.00018	-0.00417	0.00336		0.000109412	0.000312229	5.12656e-05	1.08241e-05	0.000223502	3.24e-08	1.73889e-05	1.12896e-05
43.6	0.04526	0.05107	0.02519	0.02486	0.03545	0.03772	0.02873	0.02021		0.0346	0.039	0.0328	0.026	0.0227	0.0322	0.0274	0.0158		0.01066	0.01207	-0.00761	-0.00114	0.01275	0.00552	0.00133	0.00441		0.000113636	0.000145685	5.79121e-05	1.2996e-06	0.000162563	3.04704e-05	1.7689e-06	1.94481e-05
43.8	0.04491	0.05017	0.02444	0.02501	0.03235	0.03412	0.02478	0.02171		0.0342	0.0385	0.0326	0.0258	0.0227	0.0321	0.0273	0.0157		0.01071	0.01167	-0.00816	-0.00079	0.00965	0.00202	-0.00252	0.00601		0.000114704	0.000136189	6.65856e-05	6.241e-07	9.31225e-05	4.0804e-06	6.3504e-06	3.61201e-05
44	0.04366	0.05042	0.02784	0.02721	0.03295	0.03297	0.02868	0.02026		0.0338	0.0381	0.0323	0.0257	0.0225	0.0319	0.0272	0.0157		0.00986	0.01232	-0.00446	0.00151	0.01045	0.00107	0.00148	0.00456		9.72196e-05	0.000151782	1.98916e-05	2.2801e-06	0.000109203	1.1449e-06	2.1904e-06	2.07936e-05
44.2	0.04346	0.05117	0.02584	0.02486	0.02755	0.03732	0.02468	0.01836		0.0333	0.0378	0.032	0.0254	0.0224	0.0317	0.0271	0.0155		0.01016	0.01337	-0.00616	-0.00054	0.00515	0.00562	-0.00242	0.00286		0.000103226	0.000178757	3.79456e-05	2.916e-07	2.65225e-05	3.15844e-05	5.8564e-06	8.1796e-06
44.4	0.04191	0.04917	0.02734	0.02271	0.03405	0.03962	0.02978	0.02006		0.0329	0.0375	0.0317	0.0252	0.0222	0.0314	0.0269	0.0155		0.00901	0.01167	-0.00436	-0.00249	0.01185	0.00822	0.00288	0.00456		8.11801e-05	0.000136189	1.90096e-05	6.2001e-06	0.000140422	6.75684e-05	8.2944e-06	2.07936e-05
44.6	0.04236	0.05162	0.02814	0.02316	0.0322	0.03412	0.02638	0.01831		0.0327	0.0373	0.0314	0.0249	0.022	0.0312	0.0267	0.0153		0.00966	0.01432	-0.00326	-0.00174	0.0102	0.00292	-0.00032	0.00301		9.33156e-05	0.000205062	1.06276e-05	3.0276e-06	0.00010404	8.5264e-06	1.024e-07	9.0601e-06
44.8	0.04181	0.05282	0.02499	0.02526	0.02795	0.03042	0.02383	0.02191		0.0324	0.037	0.0312	0.0246	0.0218	0.0309	0.0265	0.0151		0.00941	0.01582	-0.00621	0.00066	0.00615	-0.00048	-0.00267	0.00681		8.85481e-05	0.000250272	3.85641e-05	4.356e-07	3.78225e-05	2.304e-07	7.1289e-06	4.63761e-05
45	0.04161	0.05257	0.02919	0.02811	0.02945	0.02867	0.02663	0.02076		0.0323	0.0367	0.031	0.0245	0.0216	0.0307	0.0263	0.0149		0.00931	0.01587	-0.00181	0.00361	0.00785	-0.00203	0.00033	0.00586		8.66761e-05	0.000251857	3.2761e-06	1.30321e-05	6.16225e-05	4.1209e-06	1.089e-07	3.43396e-05
45.2	0.04136	0.05282	0.02564	0.02381	0.0282	0.03562	0.02343	0.01986		0.0322	0.0364	0.0308	0.0243	0.0214	0.0305	0.0261	0.0148		0.00916	0.01642	-0.00516	-0.00049	0.0068	0.00512	-0.00267	0.00506		8.39056e-05	0.000269616	2.66256e-05	2.401e-07	4.624e-05	2.62144e-05	7.1289e-06	2.56036e-05
45.4	0.04201	0.04907	0.02679	0.02286	0.03055	0.04152	0.02708	0.01881		0.032	0.0361	0.0307	0.0242	0.0213	0.0303	0.0259	0.0146		0.01001	0.01297	-0.00391	-0.00134	0.00925	0.01122	0.00118	0.00421		0.0001002	0.000168221	1.52881e-05	1.7956e-06	8.55625e-05	0.000125888	1.3924e-06	1.77241e-05
45.6	0.04096	0.04657	0.02409	0.02346	0.0317	0.03157	0.02508	0.01861		0.0318	0.0359	0.0306	0.024	0.0211	0.0301	0.0257	0.0145		0.00916	0.01067	-0.00651	-0.00054	0.0106	0.00147	-0.00062	0.00411		8.39056e-05	0.000113849	4.23801e-05	2.916e-07	0.00011236	2.1609e-06	3.844e-07	1.68921e-05
45.8	0.04031	0.04622	0.02449	0.02336	0.0264	0.03337	0.02783	0.02041		0.0316	0.0356	0.0304	0.0239	0.021	0.03	0.0256	0.0144		0.00871	0.01062	-0.00591	-0.00054	0.0054	0.00337	0.00223	0.00601		7.58641e-05	0.000112784	3.49281e-05	2.916e-07	2.916e-05	1.13569e-05	4.9729e-06	3.61201e-05
46	0.04161	0.04652	0.02734	0.02401	0.0329	0.03302	0.02508	0.01961		0.0314	0.0355	0.0303	0.0237	0.0208	0.0298	0.0254	0.0143		0.01021	0.01102	-0.00296	0.00031	0.0121	0.00322	-0.00032	0.00531		0.000104244	0.00012144	8.7616e-06	9.61e-08	0.00014641	1.03684e-05	1.024e-07	2.81961e-05
46.2	0.03976	0.04447	0.02319	0.02661	0.02725	0.03247	0.02528	0.02046		0.0311	0.0355	0.0301	0.0236	0.0207	0.0297	0.0253	0.0142		0.00866	0.00897	-0.00691	0.00301	0.00655	0.00277	-2e-05	0.00626		7.49956e-05	8.04609e-05	4.77481e-05	9.0601e-06	4.29025e-05	7.6729e-06	4e-10	3.91876e-05
46.4	0.04046	0.04407	0.02594	0.02486	0.02425	0.03172	0.02133	0.01751		0.0309	0.0355	0.03	0.0234	0.0205	0.0295	0.0251	0.0142		0.00956	0.00857	-0.00406	0.00146	0.00375	0.00222	-0.00377	0.00331		9.13936e-05	7.34449e-05	1.64836e-05	2.1316e-06	1.40625e-05	4.9284e-06	1.42129e-05	1.09561e-05
46.6	0.04031	0.04572	0.02469	0.02251	0.02345	0.02942	0.02243	0.01851		0.0307	0.0356	0.0298	0.0232	0.0203	0.0294	0.025	0.0141		0.00961	0.01012	-0.00511	-0.00069	0.00315	2e-05	-0.00257	0.00441		9.23521e-05	0.000102414	2.61121e-05	4.761e-07	9.9225e-06	4e-10	6.6049e-06	1.94481e-05
46.8	0.03886	0.04892	0.02339	0.02041	0.02365	0.03222	0.02438	0.01886		0.0306	0.0356	0.0297	0.0231	0.0202	0.0292	0.0248	0.014		0.00826	0.01332	-0.00631	-0.00269	0.00345	0.00302	-0.00042	0.00486		6.82276e-05	0.000177422	3.98161e-05	7.2361e-06	1.19025e-05	9.1204e-06	1.764e-07	2.36196e-05
47	0.04021	0.05087	0.02499	0.02331	0.02395	0.03592	0.02588	0.01876		0.0306	0.0355	0.0296	0.0229	0.02	0.0291	0.0246	0.0139		0.00961	0.01537	-0.00461	0.00041	0.00395	0.00682	0.00128	0.00486		9.23521e-05	0.000236237	2.12521e-05	1.681e-07	1.56025e-05	4.65124e-05	1.6384e-06	2.36196e-05
47.2	0.03741	0.04967	0.02414	0.02286	0.0246	0.03402	0.02273	0.01721		0.0306	0.0354	0.0295	0.0228	0.0199	0.029	0.0245	0.0139		0.00681	0.01427	-0.00536	6e-05	0.0047	0.00502	-0.00177	0.00331		4.63761e-05	0.000203633	2.87296e-05	3.6e-09	2.209e-05	2.52004e-05	3.1329e-06	1.09561e-05
47.4	0.03836	0.05062	0.02554	0.02086	0.0278	0.03767	0.02628	0.01881		0.0306	0.0351	0.0294	0.0227	0.0198	0.0289	0.0243	0.0138		0.00776	0.01552	-0.00386	-0.00184	0.008	0.00877	0.00198	0.00501		6.02176e-05	0.00024087	1.48996e-05	3.3856e-06	6.4e-05	7.69129e-05	3.9204e-06	2.51001e-05
47.6	0.03766	0.04887	0.02409	0.02411	0.02765	0.03007	0.02233	0.02046		0.0305	0.0348	0.0293	0.0226	0.0197	0.0288	0.0242	0.0137		0.00716	0.01407	-0.00521	0.00151	0.00795	0.00127	-0.00187	0.00676		5.12656e-05	0.000197965	2.71441e-05	2.2801e-06	6.32025e-05	1.6129e-06	3.4969e-06	4.56976e-05
47.8	0.03826	0.04922	0.02369	0.02421	0.0294	0.02872	0.02458	0.01966		0.0304	0.0346	0.0292	0.0225	0.0196	0.0287	0.0241	0.0137		0.00786	0.01462	-0.00551	0.00171	0.0098	2e-05	0.00048	0.00596		6.17796e-05	0.000213744	3.03601e-05	2.9241e-06	9.604e-05	4e-10	2.304e-07	3.55216e-05
48	0.03711	0.04702	0.02474	0.02286	0.02785	0.02937	0.02208	0.02026		0.0303	0.0343	0.029	0.0225	0.0196	0.0286	0.0241	0.0136		0.00681	0.01272	-0.00426	0.00036	0.00825	0.00077	-0.00202	0.00666		4.63761e-05	0.000161798	1.81476e-05	1.296e-07	6.80625e-05	5.929e-07	4.0804e-06	4.43556e-05
48.2	0.03721	0.04657	0.02329	0.02546	0.027	0.03257	0.02243	0.01916		0.0301	0.0341	0.0289	0.0223	0.0195	0.0285	0.024	0.0136		0.00711	0.01247	-0.00561	0.00316	0.0075	0.00407	-0.00157	0.00556		5.05521e-05	0.000155501	3.14721e-05	9.9856e-06	5.625e-05	1.65649e-05	2.4649e-06	3.09136e-05
48.4	0.03751	0.04737	0.02439	0.02136	0.02365	0.03802	0.02418	0.01816		0.03	0.034	0.0287	0.0222	0.0194	0.0283	0.0239	0.0136		0.00751	0.01337	-0.00431	-0.00084	0.00425	0.00972	0.00028	0.00456		5.64001e-05	0.000178757	1.85761e-05	7.056e-07	1.80625e-05	9.44784e-05	7.84e-08	2.07936e-05
48.6	0.03706	0.04752	0.02354	0.02216	0.02495	0.03542	0.02368	0.01846		0.0299	0.0339	0.0286	0.0221	0.0193	0.0282	0.0238	0.0136		0.00716	0.01362	-0.00506	6e-05	0.00565	0.00722	-0.00012	0.00486		5.12656e-05	0.000185504	2.56036e-05	3.6e-09	3.19225e-05	5.21284e-05	1.44e-08	2.36196e-05
48.8	0.03841	0.04902	0.02329	0.02116	0.02645	0.03912	0.02313	0.01886		0.0298	0.0338	0.0285	0.0219	0.0192	0.0281	0.0237	0.0135		0.00861	0.01522	-0.00521	-0.00074	0.00725	0.01102	-0.00057	0.00536		7.41321e-05	0.000231648	2.71441e-05	5.476e-07	5.25625e-05	0.00012144	3.249e-07	2.87296e-05
49	0.03731	0.04612	0.02369	0.02061	0.02715	0.03087	0.02403	0.01941		0.0297	0.0337	0.0284	0.0218	0.0191	0.028	0.0236	0.0135		0.00761	0.01242	-0.00471	-0.00119	0.00805	0.00287	0.00043	0.00591		5.79121e-05	0.000154256	2.21841e-05	1.4161e-06	6.48025e-05	8.2369e-06	1.849e-07	3.49281e-05
49.2	0.03846	0.04617	0.02259	0.02056	0.0237	0.02712	0.02313	0.01986		0.0296	0.0337	0.0284	0.0217	0.019	0.0279	0.0235	0.0134		0.00886	0.01247	-0.00581	-0.00114	0.0047	-0.00078	-0.00037	0.00646		7.84996e-05	0.000155501	3.37561e-05	1.2996e-06	2.209e-05	6.084e-07	1.369e-07	4.17316e-05
49.4	0.03706	0.04487	0.02399	0.02216	0.02135	0.02922	0.02418	0.01976		0.0295	0.0336	0.0283	0.0217	0.0189	0.0279	0.0235	0.0134		0.00756	0.01127	-0.00431	0.00046	0.00245	0.00132	0.00068	0.00636		5.71536e-05	0.000127013	1.85761e-05	2.116e-07	6.0025e-06	1.7424e-06	4.624e-07	4.04496e-05
49.6	0.03711	0.04442	0.02314	0.02036	0.0226	0.02827	0.02128	0.01631		0.0295	0.0334	0.0282	0.0217	0.0189	0.0278	0.0234	0.0133		0.00761	0.01102	-0.00506	-0.00134	0.0037	0.00047	-0.00212	0.00301		5.79121e-05	0.00012144	2.56036e-05	1.7956e-06	1.369e-05	2.209e-07	4.4944e-06	9.0601e-06
49.8	0.03671	0.04532	0.02229	0.02226	0.02245	0.03147	0.02123	0.01711		0.0294	0.0333	0.0282	0.0216	0.0189	0.0277	0.0233	0.0133		0.00731	0.01202	-0.00591	0.00066	0.00355	0.00377	-0.00207	0.00381		5.34361e-05	0.00014448	3.49281e-05	4.356e-07	1.26025e-05	1.42129e-05	4.2849e-06	1.45161e-05
50	0.03686	0.04547	0.02319	0.02141	0.02015	0.02962	0.02373	0.01796		0.0293	0.0332	0.0281	0.0216	0.0188	0.0277	0.0233	0.0133		0.00756	0.01227	-0.00491	-0.00019	0.00135	0.00192	0.00043	0.00466		5.71536e-05	0.000150553	2.41081e-05	3.61e-08	1.8225e-06	3.6864e-06	1.849e-07	2.17156e-05
50.2	0.03636	0.04502	0.02194	0.02051	0.0208	0.03052	0.02278	0.01791		0.0292	0.0332	0.028	0.0215	0.0188	0.0276	0.0232	0.0133		0.00716	0.01182	-0.00606	-0.00099	0.002	0.00292	-0.00042	0.00461		5.12656e-05	0.000139712	3.67236e-05	9.801e-07	4e-06	8.5264e-06	1.764e-07	2.12521e-05
50.4	0.03666	0.04512	0.02359	0.02121	0.02165	0.03057	0.02173	0.01796		0.0291	0.0333	0.0279	0.0214	0.0187	0.0275	0.0231	0.0132		0.00756	0.01182	-0.00431	-0.00019	0.00295	0.00307	-0.00137	0.00476		5.71536e-05	0.000139712	1.85761e-05	3.61e-08	8.7025e-06	9.4249e-06	1.8769e-06	2.26576e-05
50.6	0.03656	0.04597	0.02259	0.02006	0.021	0.02977	0.02353	0.01736		0.0291	0.0334	0.0278	0.0213	0.0186	0.0274	0.023	0.0132		0.00746	0.01257	-0.00521	-0.00124	0.0024	0.00237	0.00053	0.00416		5.56516e-05	0.000158005	2.71441e-05	1.5376e-06	5.76e-06	5.6169e-06	2.809e-07	1.73056e-05
50.8	0.03591	0.04742	0.02209	0.02186	0.0216	0.03182	0.02178	0.01991		0.0291	0.0336	0.0278	0.0212	0.0185	0.0273	0.023	0.0132		0.00681	0.01382	-0.00571	0.00066	0.0031	0.00452	-0.00122	0.00671		4.63761e-05	0.000190992	3.26041e-05	4.356e-07	9.61e-06	2.04304e-05	1.4884e-06	4.50241e-05
51	0.03661	0.04502	0.02324	0.02086	0.02245	0.03152	0.01913	0.01971		0.0291	0.0337	0.0278	0.0211	0.0184	0.0272	0.0229	0.0131		0.00751	0.01132	-0.00456	-0.00024	0.00405	0.00432	-0.00377	0.00661		5.64001e-05	0.000128142	2.07936e-05	5.76e-08	1.64025e-05	1.86624e-05	1.42129e-05	4.36921e-05
51.2	0.03691	0.04547	0.02159	0.01971	0.02135	0.02647	0.02303	0.02031		0.0292	0.0339	0.0278	0.0211	0.0184	0.0272	0.0228	0.0131		0.00771	0.01157	-0.00621	-0.00139	0.00295	-0.00073	0.00023	0.00721		5.94441e-05	0.000133865	3.85641e-05	1.9321e-06	8.7025e-06	5.329e-07	5.29e-08	5.19841e-05
51.4	0.03546	0.04557	0.02244	0.02181	0.02205	0.02972	0.02193	0.02046		0.0292	0.0339	0.0279	0.0211	0.0183	0.0272	0.0227	0.0131		0.00626	0.01167	-0.00546	0.00071	0.00375	0.00252	-0.00077	0.00736		3.91876e-05	0.000136189	2.98116e-05	5.041e-07	1.40625e-05	6.3504e-06	5.929e-07	5.41696e-05
51.6	0.03576	0.04642	0.02404	0.02146	0.02235	0.02922	0.02388	0.01896		0.0292	0.0339	0.0279	0.0211	0.0182	0.0273	0.0227	0.0131		0.00656	0.01252	-0.00386	0.00036	0.00415	0.00192	0.00118	0.00586		4.30336e-05	0.00015675	1.48996e-05	1.296e-07	1.72225e-05	3.6864e-06	1.3924e-06	3.43396e-05
51.8	0.03586	0.04797	0.02289	0.02006	0.02185	0.02937	0.02093	0.01836		0.0292	0.0338	0.0279	0.0211	0.0182	0.0273	0.0226	0.0131		0.00666	0.01417	-0.00501	-0.00104	0.00365	0.00207	-0.00167	0.00526		4.43556e-05	0.000200789	2.51001e-05	1.0816e-06	1.33225e-05	4.2849e-06	2.7889e-06	2.76676e-05
52	0.03501	0.04752	0.02319	0.02046	0.0208	0.02997	0.02158	0.01981		0.0292	0.0338	0.0278	0.0211	0.0182	0.0273	0.0226	0.0131		0.00581	0.01372	-0.00461	-0.00064	0.0026	0.00267	-0.00102	0.00671		3.37561e-05	0.000188238	2.12521e-05	4.096e-07	6.76e-06	7.1289e-06	1.0404e-06	4.50241e-05
52.2	0.03546	0.04912	0.02194	0.02091	0.02045	0.03017	0.02178	0.01926		0.0292	0.0338	0.0278	0.0211	0.0182	0.0273	0.0227	0.0131		0.00626	0.01532	-0.00586	-0.00019	0.00225	0.00287	-0.00092	0.00616		3.91876e-05	0.000234702	3.43396e-05	3.61e-08	5.0625e-06	8.2369e-06	8.464e-07	3.79456e-05
52.4	0.03521	0.04737	0.02169	0.01841	0.0239	0.02692	0.02103	0.01861		0.0292	0.0339	0.0278	0.0211	0.0182	0.0273	0.0227	0.0131		0.00601	0.01347	-0.00611	-0.00269	0.0057	-0.00038	-0.00167	0.00551		3.61201e-05	0.000181441	3.73321e-05	7.2361e-06	3.249e-05	1.444e-07	2.7889e-06	3.03601e-05
52.6	0.03626	0.04582	0.02124	0.02091	0.02195	0.02807	0.02208	0.01851		0.0293	0.0341	0.0278	0.021	0.0182	0.0272	0.0227	0.0132		0.00696	0.01172	-0.00656	-9e-05	0.00375	0.00087	-0.00062	0.00531		4.84416e-05	0.000137358	4.30336e-05	8.1e-09	1.40625e-05	7.569e-07	3.844e-07	2.81961e-05
52.8	0.03581	0.04652	0.02089	0.01956	0.0249	0.02677	0.01973	0.01776		0.0294	0.0343	0.0278	0.021	0.0182	0.0272	0.0226	0.0132		0.00641	0.01222	-0.00691	-0.00144	0.0067	-0.00043	-0.00287	0.00456		4.10881e-05	0.000149328	4.77481e-05	2.0736e-06	4.489e-05	1.849e-07	8.2369e-06	2.07936e-05
53	0.03491	0.04637	0.02209	0.02011	0.02285	0.02792	0.02118	0.01771		0.0295	0.0345	0.0279	0.0209	0.0182	0.0272	0.0226	0.0132		0.00541	0.01187	-0.00581	-0.00079	0.00465	0.00072	-0.00142	0.00451		2.92681e-05	0.000140897	3.37561e-05	6.241e-07	2.16225e-05	5.184e-07	2.0164e-06	2.03401e-05
53.2	0.03616	0.04622	0.02224	0.02271	0.02095	0.02667	0.02258	0.01946		0.0297	0.0347	0.0279	0.0209	0.0182	0.0272	0.0226	0.0132		0.00646	0.01152	-0.00566	0.00181	0.00275	-0.00053	-2e-05	0.00626		4.17316e-05	0.00013271	3.20356e-05	3.2761e-06	7.5625e-06	2.809e-07	4e-10	3.91876e-05
53.4	0.03596	0.04532	0.02189	0.01976	0.0215	0.03032	0.02058	0.01801		0.0299	0.0349	0.028	0.021	0.0182	0.0273	0.0226	0.0132		0.00606	0.01042	-0.00611	-0.00124	0.0033	0.00302	-0.00202	0.00481		3.67236e-05	0.000108576	3.73321e-05	1.5376e-06	1.089e-05	9.1204e-06	4.0804e-06	2.31361e-05
53.6	0.03526	0.04432	0.02264	0.02166	0.0201	0.02722	0.02048	0.01836		0.03	0.0351	0.0281	0.0211	0.0182	0.0273	0.0226	0.0132		0.00526	0.00922	-0.00546	0.00056	0.0019	-8e-05	-0.00212	0.00516		2.76676e-05	8.50084e-05	2.98116e-05	3.136e-07	3.61e-06	6.4e-09	4.4944e-06	2.66256e-05
53.8	0.03596	0.04552	0.02119	0.01961	0.02185	0.02632	0.01963	0.01791		0.0302	0.0353	0.0283	0.0211	0.0183	0.0274	0.0227	0.0132		0.00576	0.01022	-0.00711	-0.00149	0.00355	-0.00108	-0.00307	0.00471		3.31776e-05	0.000104448	5.05521e-05	2.2201e-06	1.26025e-05	1.1664e-06	9.4249e-06	2.21841e-05
54	0.03601	0.05037	0.02269	0.02031	0.02175	0.03027	0.02013	0.01831		0.0304	0.0354	0.0284	0.0212	0.0184	0.0275	0.0227	0.0133		0.00561	0.01497	-0.00571	-0.00089	0.00335	0.00277	-0.00257	0.00501		3.14721e-05	0.000224101	3.26041e-05	7.921e-07	1.12225e-05	7.6729e-06	6.6049e-06	2.51001e-05
54.2	0.03571	0.05132	0.02109	0.01976	0.02105	0.02817	0.02393	0.01761		0.0305	0.0354	0.0285	0.0213	0.0184	0.0276	0.0228	0.0133		0.00521	0.01592	-0.00741	-0.00154	0.00265	0.00057	0.00113	0.00431		2.71441e-05	0.000253446	5.49081e-05	2.3716e-06	7.0225e-06	3.249e-07	1.2769e-06	1.85761e-05
54.4	0.03571	0.04842	0.02294	0.01841	0.02065	0.02882	0.02193	0.01706		0.0305	0.0354	0.0285	0.0214	0.0185	0.0277	0.0229	0.0133		0.00521	0.01302	-0.00556	-0.00299	0.00215	0.00112	-0.00097	0.00376		2.71441e-05	0.00016952	3.09136e-05	8.9401e-06	4.6225e-06	1.2544e-06	9.409e-07	1.41376e-05
54.6	0.03586	0.04687	0.02224	0.02096	0.02415	0.02652	0.02043	0.01916		0.0305	0.0353	0.0285	0.0214	0.0185	0.0278	0.023	0.0133		0.00536	0.01157	-0.00626	-0.00044	0.00565	-0.00128	-0.00257	0.00586		2.87296e-05	0.000133865	3.91876e-05	1.936e-07	3.19225e-05	1.6384e-06	6.6049e-06	3.43396e-05
54.8	0.03601	0.04767	0.02249	0.01971	0.02225	0.02717	0.01953	0.01826		0.0305	0.0352	0.0285	0.0215	0.0186	0.0279	0.023	0.0134		0.00551	0.01247	-0.00601	-0.00179	0.00365	-0.00073	-0.00347	0.00486		3.03601e-05	0.000155501	3.61201e-05	3.2041e-06	1.33225e-05	5.329e-07	1.20409e-05	2.36196e-05
55	0.03636	0.04847	0.02299	0.02111	0.02325	0.02857	0.02188	0.01886		0.0304	0.0352	0.0285	0.0215	0.0187	0.0279	0.0231	0.0134		0.00596	0.01327	-0.00551	-0.00039	0.00455	0.00067	-0.00122	0.00546		3.55216e-05	0.000176093	3.03601e-05	1.521e-07	2.07025e-05	4.489e-07	1.4884e-06	2.98116e-05
55.2	0.03616	0.04622	0.02219	0.01991	0.02325	0.02592	0.02133	0.01796		0.0303	0.0353	0.0284	0.0215	0.0187	0.0279	0.0231	0.0134		0.00586	0.01092	-0.00621	-0.00159	0.00455	-0.00198	-0.00177	0.00456		3.43396e-05	0.000119246	3.85641e-05	2.5281e-06	2.07025e-05	3.9204e-06	3.1329e-06	2.07936e-05
55.4	0.03626	0.04712	0.02194	0.01901	0.0199	0.02647	0.02123	0.01846		0.0303	0.0356	0.0284	0.0215	0.0188	0.0279	0.0232	0.0134		0.00596	0.01152	-0.00646	-0.00249	0.0011	-0.00143	-0.00197	0.00506		3.55216e-05	0.00013271	4.17316e-05	6.2001e-06	1.21e-06	2.0449e-06	3.8809e-06	2.56036e-05
55.6	0.03731	0.04512	0.02279	0.02096	0.0204	0.02722	0.02013	0.01846		0.0304	0.0359	0.0285	0.0214	0.0188	0.0278	0.0232	0.0134		0.00691	0.00922	-0.00571	-0.00044	0.0016	-0.00058	-0.00307	0.00506		4.77481e-05	8.50084e-05	3.26041e-05	1.936e-07	2.56e-06	3.364e-07	9.4249e-06	2.56036e-05
55.8	0.03621	0.04492	0.02229	0.01806	0.02325	0.02602	0.02173	0.01631		0.0306	0.0363	0.0286	0.0214	0.0188	0.0278	0.0232	0.0134		0.00561	0.00862	-0.00631	-0.00334	0.00445	-0.00178	-0.00147	0.00291		3.14721e-05	7.43044e-05	3.98161e-05	1.11556e-05	1.98025e-05	3.1684e-06	2.1609e-06	8.4681e-06
56	0.03706	0.04412	0.02384	0.02036	0.0261	0.02717	0.02098	0.01781		0.0309	0.0366	0.0287	0.0214	0.0187	0.0278	0.0232	0.0134		0.00616	0.00752	-0.00486	-0.00104	0.0074	-0.00063	-0.00222	0.00441		3.79456e-05	5.65504e-05	2.36196e-05	1.0816e-06	5.476e-05	3.969e-07	4.9284e-06	1.94481e-05
56.2	0.03696	0.04302	0.02194	0.01836	0.02205	0.02522	0.02338	0.01986		0.0311	0.0368	0.0289	0.0215	0.0187	0.0279	0.0232	0.0133		0.00586	0.00622	-0.00696	-0.00314	0.00335	-0.00268	0.00018	0.00656		3.43396e-05	3.86884e-05	4.84416e-05	9.8596e-06	1.12225e-05	7.1824e-06	3.24e-08	4.30336e-05
56.4	0.03666	0.04482	0.02439	0.02156	0.02175	0.02527	0.01988	0.01786		0.0313	0.037	0.0291	0.0217	0.0188	0.0281	0.0232	0.0133		0.00536	0.00782	-0.00471	-0.00014	0.00295	-0.00283	-0.00332	0.00456		2.87296e-05	6.11524e-05	2.21841e-05	1.96e-08	8.7025e-06	8.0089e-06	1.10224e-05	2.07936e-05
56.6	0.03706	0.04662	0.02424	0.01991	0.0202	0.02722	0.02188	0.01861		0.0315	0.0371	0.0292	0.0218	0.0189	0.0282	0.0233	0.0133		0.00556	0.00952	-0.00496	-0.00189	0.0013	-0.00098	-0.00142	0.00531		3.09136e-05	9.06304e-05	2.46016e-05	3.5721e-06	1.69e-06	9.604e-07	2.0164e-06	2.81961e-05
56.8	0.03696	0.04597	0.02264	0.02111	0.0217	0.03132	0.01753	0.01761		0.0316	0.0371	0.0293	0.022	0.019	0.0284	0.0234	0.0133		0.00536	0.00887	-0.00666	-0.00089	0.0027	0.00292	-0.00587	0.00431		2.87296e-05	7.86769e-05	4.43556e-05	7.921e-07	7.29e-06	8.5264e-06	3.44569e-05	1.85761e-05
57	0.03736	0.04332	0.02399	0.02026	0.0211	0.02837	0.02188	0.01806		0.0317	0.0372	0.0294	0.0221	0.0191	0.0285	0.0235	0.0133		0.00566	0.00612	-0.00541	-0.00184	0.002	-0.00013	-0.00162	0.00476		3.20356e-05	3.74544e-05	2.92681e-05	3.3856e-06	4e-06	1.69e-08	2.6244e-06	2.26576e-05
57.2	0.03741	0.04482	0.02244	0.02196	0.0223	0.02582	0.02248	0.01636		0.0317	0.0371	0.0294	0.0222	0.0192	0.0286	0.0236	0.0133		0.00571	0.00772	-0.00696	-0.00024	0.0031	-0.00278	-0.00112	0.00306		3.26041e-05	5.95984e-05	4.84416e-05	5.76e-08	9.61e-06	7.7284e-06	1.2544e-06	9.3636e-06
57.4	0.03681	0.04497	0.02499	0.01996	0.0249	0.02677	0.02093	0.01976		0.0316	0.037	0.0295	0.0222	0.0193	0.0286	0.0237	0.0134		0.00521	0.00797	-0.00451	-0.00224	0.0056	-0.00183	-0.00277	0.00636		2.71441e-05	6.35209e-05	2.03401e-05	5.0176e-06	3.136e-05	3.3489e-06	7.6729e-06	4.04496e-05
57.6	0.03711	0.04552	0.02289	0.02396	0.02585	0.02747	0.02413	0.01816		0.0315	0.0369	0.0294	0.0222	0.0193	0.0287	0.0238	0.0134		0.00561	0.00862	-0.00651	0.00176	0.00655	-0.00123	0.00033	0.00476		3.14721e-05	7.43044e-05	4.23801e-05	3.0976e-06	4.29025e-05	1.5129e-06	1.089e-07	2.26576e-05
57.8	0.03781	0.04447	0.02209	0.02011	0.0266	0.02692	0.02208	0.01896		0.0314	0.0368	0.0294	0.0222	0.0193	0.0287	0.0238	0.0135		0.00641	0.00767	-0.00731	-0.00209	0.0073	-0.00178	-0.00172	0.00546		4.10881e-05	5.88289e-05	5.34361e-05	4.3681e-06	5.329e-05	3.1684e-06	2.9584e-06	2.98116e-05
58	0.03711	0.04682	0.02254	0.02051	0.0288	0.02742	0.02073	0.01806		0.0313	0.0366	0.0293	0.0222	0.0194	0.0288	0.0239	0.0135		0.00581	0.01022	-0.00676	-0.00169	0.0094	-0.00138	-0.00317	0.00456		3.37561e-05	0.000104448	4.56976e-05	2.8561e-06	8.836e-05	1.9044e-06	1.00489e-05	2.07936e-05
58.2	0.03761	0.04937	0.02154	0.02006	0.02295	0.02647	0.02248	0.01916		0.0312	0.0365	0.0292	0.0222	0.0194	0.0287	0.0239	0.0135		0.00641	0.01287	-0.00766	-0.00214	0.00355	-0.00223	-0.00142	0.00566		4.10881e-05	0.000165637	5.86756e-05	4.5796e-06	1.26025e-05	4.9729e-06	2.0164e-06	3.20356e-05
58.4	0.03686	0.05132	0.02349	0.02336	0.02485	0.02642	0.02178	0.01986		0.0311	0.0364	0.0292	0.0222	0.0194	0.0287	0.0239	0.0136		0.00576	0.01492	-0.00571	0.00116	0.00545	-0.00228	-0.00212	0.00626		3.31776e-05	0.000222606	3.26041e-05	1.3456e-06	2.97025e-05	5.1984e-06	4.4944e-06	3.91876e-05
58.6	0.03676	0.04957	0.02349	0.02086	0.02355	0.02702	0.02353	0.01876		0.0311	0.0363	0.0291	0.0222	0.0194	0.0286	0.024	0.0136		0.00566	0.01327	-0.00561	-0.00134	0.00415	-0.00158	-0.00047	0.00516		3.20356e-05	0.000176093	3.14721e-05	1.7956e-06	1.72225e-05	2.4964e-06	2.209e-07	2.66256e-05
58.8	0.03721	0.04937	0.02144	0.02091	0.02495	0.02792	0.02153	0.01666		0.0312	0.0363	0.0291	0.0221	0.0194	0.0286	0.024	0.0136		0.00601	0.01307	-0.00766	-0.00119	0.00555	-0.00068	-0.00247	0.00306		3.61201e-05	0.000170825	5.86756e-05	1.4161e-06	3.08025e-05	4.624e-07	6.1009e-06	9.3636e-06
59	0.03686	0.04882	0.02369	0.02296	0.0258	0.03112	0.02198	0.01726		0.0312	0.0364	0.0292	0.0221	0.0194	0.0286	0.024	0.0136		0.00566	0.01242	-0.00551	0.00086	0.0064	0.00252	-0.00202	0.00366		3.20356e-05	0.000154256	3.03601e-05	7.396e-07	4.096e-05	6.3504e-06	4.0804e-06	1.33956e-05
59.2	0.03836	0.04712	0.02344	0.02206	0.0274	0.02967	0.02228	0.01661		0.0313	0.0366	0.0292	0.0221	0.0194	0.0285	0.024	0.0136		0.00706	0.01052	-0.00576	-4e-05	0.008	0.00117	-0.00172	0.00301		4.98436e-05	0.00011067	3.31776e-05	1.6e-09	6.4e-05	1.3689e-06	2.9584e-06	9.0601e-06
59.4	0.03736	0.04587	0.02459	0.01946	0.02775	0.02847	0.02173	0.01706		0.0313	0.0368	0.0293	0.0221	0.0194	0.0285	0.0239	0.0135		0.00606	0.00907	-0.00471	-0.00264	0.00835	-3e-05	-0.00217	0.00356		3.67236e-05	8.22649e-05	2.21841e-05	6.9696e-06	6.97225e-05	9e-10	4.7089e-06	1.26736e-05
59.6	0.03796	0.04642	0.02274	0.02311	0.02575	0.02852	0.02268	0.02011		0.0314	0.0371	0.0294	0.0222	0.0194	0.0285	0.0239	0.0135		0.00656	0.00932	-0.00666	0.00091	0.00635	2e-05	-0.00122	0.00661		4.30336e-05	8.68624e-05	4.43556e-05	8.281e-07	4.03225e-05	4e-10	1.4884e-06	4.36921e-05
59.8	0.03706	0.04827	0.02204	0.02016	0.03275	0.02817	0.02248	0.01871		0.0315	0.0373	0.0295	0.0222	0.0194	0.0286	0.0239	0.0135		0.00556	0.01097	-0.00746	-0.00204	0.01335	-0.00043	-0.00142	0.00521		3.09136e-05	0.000120341	5.56516e-05	4.1616e-06	0.000178223	1.849e-07	2.0164e-06	2.71441e-05
										0.0316	0.0375	0.0296	0.0223	0.0194	0.0287	0.0239	0.0135		-0.0316	-0.0375	-0.0296	-0.0223	-0.0194	-0.0287	-0.0239	-0.0135		0.00099856	0.00140625	0.00087616	0.00049729	0.00037636	0.00082369	0.00057121	0.00018225

## Sheet: RMSE_DiffusionWave
t	S3	S4	S5	S6	S7	S8	S9	S10		HEC_Dif_P3	HEC_Dif_P4	HEC_Dif_P5	HEC_Dif_P6	HEC_Dif_P7	HEC_Dif_P8	HEC_Dif_P9	HEC_Dif_P10		Error 3	Error 4	Error 5	Error 6	Error 7	Error 8	Error 9	Error 10		Error ^2_3	Error ^2_4	Error ^2_5	Error ^2_6	Error ^2_7	Error ^2_8	Error ^2_9	Error ^2_10		RMSE 3	RMSE 4	RMSE 5	RMSE 6	RMSE 7	RMSE 8	RMSE 9	RMSE 10
0	0.00011	-8e-05	0.00039	6e-05	0	-3e-05	-7e-05	-4e-05		0	0	0	0	0	0	0	0		0.00011	-8e-05	0.00039	6e-05	0	-3e-05	-7e-05	-4e-05		1.21e-08	6.4e-09	1.521e-07	3.6e-09	0	9e-10	4.9e-09	1.6e-09		2.59716	3.13741	0.484627	0.926659	1.48419	1.19106	0.888119	0.558847
0.2	-0.00014	7e-05	-6e-05	0.00011	0	-3e-05	-7e-05	-9e-05		0	0	0	0	0	0	0	0		-0.00014	7e-05	-6e-05	0.00011	0	-3e-05	-7e-05	-9e-05		1.96e-08	4.9e-09	3.6e-09	1.21e-08	0	9e-10	4.9e-09	8.1e-09
0.4	-0.00014	-3e-05	-6e-05	6e-05	-0.00015	0.00012	-2e-05	-9e-05		0	0	0	0	0	0	0	0		-0.00014	-3e-05	-6e-05	6e-05	-0.00015	0.00012	-2e-05	-9e-05		1.96e-08	9e-10	3.6e-09	3.6e-09	2.25e-08	1.44e-08	4e-10	8.1e-09
0.6	6e-05	2e-05	-6e-05	6e-05	5e-05	-8e-05	3e-05	-9e-05		0	0	0	0	0	0	0	0		6e-05	2e-05	-6e-05	6e-05	5e-05	-8e-05	3e-05	-9e-05		3.6e-09	4e-10	3.6e-09	3.6e-09	2.5e-09	6.4e-09	9e-10	8.1e-09
0.8	1e-05	-0.00013	4e-05	6e-05	-5e-05	-3e-05	3e-05	-9e-05		0	0	0	0	0	0	0	0		1e-05	-0.00013	4e-05	6e-05	-5e-05	-3e-05	3e-05	-9e-05		1e-10	1.69e-08	1.6e-09	3.6e-09	2.5e-09	9e-10	9e-10	8.1e-09
1	-0.00014	0.00017	-6e-05	6e-05	-0.00015	0.00012	3e-05	-0.00014		0	0	0	0	0	0	0	0		-0.00014	0.00017	-6e-05	6e-05	-0.00015	0.00012	3e-05	-0.00014		1.96e-08	2.89e-08	3.6e-09	3.6e-09	2.25e-08	1.44e-08	9e-10	1.96e-08
1.2	1e-05	-3e-05	-0.00021	1e-05	0.0001	-3e-05	-2e-05	-0.00014		0	0	0	0	0	0	0	0		1e-05	-3e-05	-0.00021	1e-05	0.0001	-3e-05	-2e-05	-0.00014		1e-10	9e-10	4.41e-08	1e-10	1e-08	9e-10	4e-10	1.96e-08
1.4	1e-05	-3e-05	9e-05	6e-05	0	-3e-05	-2e-05	-0.00014		0	0	0	0	0	0	0	0		1e-05	-3e-05	9e-05	6e-05	0	-3e-05	-2e-05	-0.00014		1e-10	9e-10	8.1e-09	3.6e-09	0	9e-10	4e-10	1.96e-08
1.6	0.00026	-0.00013	4e-05	-4e-05	-5e-05	0.00012	-2e-05	-0.00014		0	0	0	0	0	0	0	0		0.00026	-0.00013	4e-05	-4e-05	-5e-05	0.00012	-2e-05	-0.00014		6.76e-08	1.69e-08	1.6e-09	1.6e-09	2.5e-09	1.44e-08	4e-10	1.96e-08
1.8	1e-05	0.00027	-1e-05	-4e-05	0.0002	-0.00013	3e-05	-0.00014		0	0	0	0	0	0	0	0		1e-05	0.00027	-1e-05	-4e-05	0.0002	-0.00013	3e-05	-0.00014		1e-10	7.29e-08	1e-10	1.6e-09	4e-08	1.69e-08	9e-10	1.96e-08
2	-9e-05	2e-05	-1e-05	1e-05	0	-3e-05	0.00013	-9e-05		0	0	0	0	0	0	0	0		-9e-05	2e-05	-1e-05	1e-05	0	-3e-05	0.00013	-9e-05		8.1e-09	4e-10	1e-10	1e-10	0	9e-10	1.69e-08	8.1e-09
2.2	0.00011	-0.00018	-1e-05	-4e-05	0	0.00012	0.00013	-9e-05		0	0	0	0	0	0	0	0		0.00011	-0.00018	-1e-05	-4e-05	0	0.00012	0.00013	-9e-05		1.21e-08	3.24e-08	1e-10	1.6e-09	0	1.44e-08	1.69e-08	8.1e-09
2.4	1e-05	-0.00013	-1e-05	1e-05	-0.00015	-0.00013	0.00013	1e-05		0	0	0	0	0	0	0	0		1e-05	-0.00013	-1e-05	1e-05	-0.00015	-0.00013	0.00013	1e-05		1e-10	1.69e-08	1e-10	1e-10	2.25e-08	1.69e-08	1.69e-08	1e-10
2.6	-9e-05	0.00032	-0.00016	-4e-05	5e-05	7e-05	0.00023	0.00011		0	0	0	0	0	0	0	0		-9e-05	0.00032	-0.00016	-4e-05	5e-05	7e-05	0.00023	0.00011		8.1e-09	1.024e-07	2.56e-08	1.6e-09	2.5e-09	4.9e-09	5.29e-08	1.21e-08
2.8	0.00011	7e-05	4e-05	-4e-05	0	0.00012	-7e-05	0.00031		0	0	0	0	0	0	0	0		0.00011	7e-05	4e-05	-4e-05	0	0.00012	-7e-05	0.00031		1.21e-08	4.9e-09	1.6e-09	1.6e-09	0	1.44e-08	4.9e-09	9.61e-08
3	1e-05	-8e-05	4e-05	-4e-05	-0.00015	-0.00013	-0.00012	0.00021		0	0	0	0	0	0	0	0		1e-05	-8e-05	4e-05	-4e-05	-0.00015	-0.00013	-0.00012	0.00021		1e-10	6.4e-09	1.6e-09	1.6e-09	2.25e-08	1.69e-08	1.44e-08	4.41e-08
3.2	-0.00014	-0.00013	-0.00016	-9e-05	0.0001	-0.00013	-0.00012	0.00011		0	0	0	0	0	0	0	0		-0.00014	-0.00013	-0.00016	-9e-05	0.0001	-0.00013	-0.00012	0.00011		1.96e-08	1.69e-08	2.56e-08	8.1e-09	1e-08	1.69e-08	1.44e-08	1.21e-08
3.4	6e-05	0.00017	0.00034	-4e-05	0	0.00012	-7e-05	0.00011		0	0	0	0	0	0	0	0		6e-05	0.00017	0.00034	-4e-05	0	0.00012	-7e-05	0.00011		3.6e-09	2.89e-08	1.156e-07	1.6e-09	0	1.44e-08	4.9e-09	1.21e-08
3.6	1e-05	-3e-05	-6e-05	-9e-05	0	-0.00018	-7e-05	0.00016		0	0	0	0	0	0	0	0		1e-05	-3e-05	-6e-05	-9e-05	0	-0.00018	-7e-05	0.00016		1e-10	9e-10	3.6e-09	8.1e-09	0	3.24e-08	4.9e-09	2.56e-08
3.8	-0.00014	2e-05	-1e-05	-4e-05	0.0002	7e-05	-2e-05	0.00011		0	0	0	0	0	0	0	0		-0.00014	2e-05	-1e-05	-4e-05	0.0002	7e-05	-2e-05	0.00011		1.96e-08	4e-10	1e-10	1.6e-09	4e-08	4.9e-09	4e-10	1.21e-08
4	1e-05	-8e-05	-0.00016	-9e-05	0	2e-05	-2e-05	6e-05		0	0	0	0	0	0	0	0		1e-05	-8e-05	-0.00016	-9e-05	0	2e-05	-2e-05	6e-05		1e-10	6.4e-09	2.56e-08	8.1e-09	0	4e-10	4e-10	3.6e-09
4.2	-4e-05	7e-05	-1e-05	-9e-05	-5e-05	-0.00018	-0.00017	6e-05		0	0	0	0	0	0	0	0		-4e-05	7e-05	-1e-05	-9e-05	-5e-05	-0.00018	-0.00017	6e-05		1.6e-09	4.9e-09	1e-10	8.1e-09	2.5e-09	3.24e-08	2.89e-08	3.6e-09
4.4	0.00011	7e-05	-0.00016	-9e-05	5e-05	-8e-05	3e-05	6e-05		0	0	0	0	0	0	0	0		0.00011	7e-05	-0.00016	-9e-05	5e-05	-8e-05	3e-05	6e-05		1.21e-08	4.9e-09	2.56e-08	8.1e-09	2.5e-09	6.4e-09	9e-10	3.6e-09
4.6	-4e-05	-3e-05	-0.00021	-4e-05	5e-05	2e-05	3e-05	1e-05		0	0	0	0	0	0	0	0		-4e-05	-3e-05	-0.00021	-4e-05	5e-05	2e-05	3e-05	1e-05		1.6e-09	9e-10	4.41e-08	1.6e-09	2.5e-09	4e-10	9e-10	1e-10
4.8	-9e-05	-8e-05	4e-05	-4e-05	-5e-05	-0.00023	-2e-05	6e-05		0	0	0	0	0	0	0	0		-9e-05	-8e-05	4e-05	-4e-05	-5e-05	-0.00023	-2e-05	6e-05		8.1e-09	6.4e-09	1.6e-09	1.6e-09	2.5e-09	5.29e-08	4e-10	3.6e-09
5	0.00016	-8e-05	-6e-05	1e-05	-0.0002	-3e-05	3e-05	1e-05		0	0	0	0	0	0	0	0		0.00016	-8e-05	-6e-05	1e-05	-0.0002	-3e-05	3e-05	1e-05		2.56e-08	6.4e-09	3.6e-09	1e-10	4e-08	9e-10	9e-10	1e-10
5.2	-4e-05	7e-05	-0.00011	1e-05	5e-05	-3e-05	8e-05	1e-05		0	0	0	0	0	0	0	0		-4e-05	7e-05	-0.00011	1e-05	5e-05	-3e-05	8e-05	1e-05		1.6e-09	4.9e-09	1.21e-08	1e-10	2.5e-09	9e-10	6.4e-09	1e-10
5.4	-0.00014	2e-05	9e-05	-9e-05	-0.0001	-0.00018	8e-05	1e-05		0	0	0	0	0	0	0	0		-0.00014	2e-05	9e-05	-9e-05	-0.0001	-0.00018	8e-05	1e-05		1.96e-08	4e-10	8.1e-09	8.1e-09	1e-08	3.24e-08	6.4e-09	1e-10
5.6	6e-05	-3e-05	-6e-05	-0.00019	-0.0001	-0.00013	0.00013	-9e-05		0	0	0	0	0	0	0	0		6e-05	-3e-05	-6e-05	-0.00019	-0.0001	-0.00013	0.00013	-9e-05		3.6e-09	9e-10	3.6e-09	3.61e-08	1e-08	1.69e-08	1.69e-08	8.1e-09
5.8	1e-05	-8e-05	-6e-05	1e-05	0.0001	-8e-05	0.00033	-4e-05		0	0	0	0	0	0	0	0		1e-05	-8e-05	-6e-05	1e-05	0.0001	-8e-05	0.00033	-4e-05		1e-10	6.4e-09	3.6e-09	1e-10	1e-08	6.4e-09	1.089e-07	1.6e-09
6	-0.00014	7e-05	-0.00021	-4e-05	-0.0001	-3e-05	3e-05	1e-05		0	0	0	0	0	0	0	0		-0.00014	7e-05	-0.00021	-4e-05	-0.0001	-3e-05	3e-05	1e-05		1.96e-08	4.9e-09	4.41e-08	1.6e-09	1e-08	9e-10	9e-10	1e-10
6.2	6e-05	-3e-05	-1e-05	-4e-05	0	-0.00013	-0.00017	-4e-05		0	0	0	0	0	0	0	0		6e-05	-3e-05	-1e-05	-4e-05	0	-0.00013	-0.00017	-4e-05		3.6e-09	9e-10	1e-10	1.6e-09	0	1.69e-08	2.89e-08	1.6e-09
6.4	1e-05	-3e-05	4e-05	-4e-05	0.0002	2e-05	-0.00012	-4e-05		0	0	0	0	0	0	0	0		1e-05	-3e-05	4e-05	-4e-05	0.0002	2e-05	-0.00012	-4e-05		1e-10	9e-10	1.6e-09	1.6e-09	4e-08	4e-10	1.44e-08	1.6e-09
6.6	-0.00014	-0.00013	-0.00016	-4e-05	0	0.00032	-7e-05	1e-05		0	0	0	0	0	0	0	0		-0.00014	-0.00013	-0.00016	-4e-05	0	0.00032	-7e-05	1e-05		1.96e-08	1.69e-08	2.56e-08	1.6e-09	0	1.024e-07	4.9e-09	1e-10
6.8	1e-05	2e-05	0.00014	-9e-05	0	-0.00013	-7e-05	-4e-05		0	0	0	0	0	0	0	0		1e-05	2e-05	0.00014	-9e-05	0	-0.00013	-7e-05	-4e-05		1e-10	4e-10	1.96e-08	8.1e-09	0	1.69e-08	4.9e-09	1.6e-09
7	-4e-05	2e-05	-6e-05	-9e-05	-0.00015	-0.00018	-2e-05	1e-05		0	0	0	0	0	0	0	0		-4e-05	2e-05	-6e-05	-9e-05	-0.00015	-0.00018	-2e-05	1e-05		1.6e-09	4e-10	3.6e-09	8.1e-09	2.25e-08	3.24e-08	4e-10	1e-10
7.2	6e-05	-0.00013	-6e-05	-4e-05	5e-05	-3e-05	-2e-05	-4e-05		0	0	0	0	0	0	0	0		6e-05	-0.00013	-6e-05	-4e-05	5e-05	-3e-05	-2e-05	-4e-05		3.6e-09	1.69e-08	3.6e-09	1.6e-09	2.5e-09	9e-10	4e-10	1.6e-09
7.4	1e-05	-0.00018	-0.00016	-9e-05	0	-0.00018	8e-05	-0.00014		0	0	0	0	0	0	0	0		1e-05	-0.00018	-0.00016	-9e-05	0	-0.00018	8e-05	-0.00014		1e-10	3.24e-08	2.56e-08	8.1e-09	0	3.24e-08	6.4e-09	1.96e-08
7.6	-9e-05	0.00012	-6e-05	-0.00014	-0.0002	-8e-05	3e-05	-4e-05		0	0	0	0	0	0	0	0		-9e-05	0.00012	-6e-05	-0.00014	-0.0002	-8e-05	3e-05	-4e-05		8.1e-09	1.44e-08	3.6e-09	1.96e-08	4e-08	6.4e-09	9e-10	1.6e-09
7.8	0.00011	2e-05	-0.00026	-4e-05	5e-05	2e-05	3e-05	1e-05		0	0	0	0	0	0	0	0		0.00011	2e-05	-0.00026	-4e-05	5e-05	2e-05	3e-05	1e-05		1.21e-08	4e-10	6.76e-08	1.6e-09	2.5e-09	4e-10	9e-10	1e-10
8	-4e-05	-3e-05	-0.00021	-0.00014	-5e-05	-0.00018	-2e-05	-4e-05		0	0	0	0	0	0	0	0		-4e-05	-3e-05	-0.00021	-0.00014	-5e-05	-0.00018	-2e-05	-4e-05		1.6e-09	9e-10	4.41e-08	1.96e-08	2.5e-09	3.24e-08	4e-10	1.6e-09
8.2	-0.00014	-0.00018	4e-05	-0.00014	-0.0001	-3e-05	-2e-05	-9e-05		0	0	0	0	0	0	0	0		-0.00014	-0.00018	4e-05	-0.00014	-0.0001	-3e-05	-2e-05	-9e-05		1.96e-08	3.24e-08	1.6e-09	1.96e-08	1e-08	9e-10	4e-10	8.1e-09
8.4	6e-05	7e-05	-6e-05	-0.00014	0.0001	2e-05	8e-05	-9e-05		0	0	0	0	0	0	0	0		6e-05	7e-05	-6e-05	-0.00014	0.0001	2e-05	8e-05	-9e-05		3.6e-09	4.9e-09	3.6e-09	1.96e-08	1e-08	4e-10	6.4e-09	8.1e-09
8.6	1e-05	-3e-05	-0.00016	-9e-05	-5e-05	-0.00023	8e-05	-9e-05		0	0	0	0	0	0	0	0		1e-05	-3e-05	-0.00016	-9e-05	-5e-05	-0.00023	8e-05	-9e-05		1e-10	9e-10	2.56e-08	8.1e-09	2.5e-09	5.29e-08	6.4e-09	8.1e-09
8.8	-0.00014	-8e-05	0.00024	-0.00014	-5e-05	2e-05	8e-05	-0.00014		0	0	0	0	0	0	0	0		-0.00014	-8e-05	0.00024	-0.00014	-5e-05	2e-05	8e-05	-0.00014		1.96e-08	6.4e-09	5.76e-08	1.96e-08	2.5e-09	4e-10	6.4e-09	1.96e-08
9	6e-05	-0.00013	-6e-05	-0.00014	0	-3e-05	0.00013	-0.00014		0	0	0	0	0	0	0	0		6e-05	-0.00013	-6e-05	-0.00014	0	-3e-05	0.00013	-0.00014		3.6e-09	1.69e-08	3.6e-09	1.96e-08	0	9e-10	1.69e-08	1.96e-08
9.2	1e-05	0.00012	-6e-05	-0.00019	0	-0.00023	8e-05	-0.00014		0	0	0	0	0	0	0	0		1e-05	0.00012	-6e-05	-0.00019	0	-0.00023	8e-05	-0.00014		1e-10	1.44e-08	3.6e-09	3.61e-08	0	5.29e-08	6.4e-09	1.96e-08
9.4	-0.00014	-3e-05	-0.00021	-0.00019	0	-8e-05	-0.00012	-9e-05		0	0	0	0	0	0	0	0		-0.00014	-3e-05	-0.00021	-0.00019	0	-8e-05	-0.00012	-9e-05		1.96e-08	9e-10	4.41e-08	3.61e-08	0	6.4e-09	1.44e-08	8.1e-09
9.6	-4e-05	-8e-05	4e-05	-0.00019	-0.00015	-0.00013	-0.00012	-0.00014		0	0	0	0	0	0	0	0		-4e-05	-8e-05	4e-05	-0.00019	-0.00015	-0.00013	-0.00012	-0.00014		1.6e-09	6.4e-09	1.6e-09	3.61e-08	2.25e-08	1.69e-08	1.44e-08	1.96e-08
9.8	-4e-05	-0.00018	-1e-05	-0.00024	0	-0.00013	-0.00012	-0.00019		0	0	0	0	0	0	0	0		-4e-05	-0.00018	-1e-05	-0.00024	0	-0.00013	-0.00012	-0.00019		1.6e-09	3.24e-08	1e-10	5.76e-08	0	1.69e-08	1.44e-08	3.61e-08
10	1e-05	7e-05	-0.00021	-0.00019	-0.0002	-0.00013	-7e-05	-0.00014		0	0	0	0	0	0	0	0		1e-05	7e-05	-0.00021	-0.00019	-0.0002	-0.00013	-7e-05	-0.00014		1e-10	4.9e-09	4.41e-08	3.61e-08	4e-08	1.69e-08	4.9e-09	1.96e-08
10.2	-4e-05	-3e-05	9e-05	-0.00019	-0.0002	-8e-05	-7e-05	-0.00014		0	0.0145	0	0	0	0	0	0		-4e-05	-0.01453	9e-05	-0.00019	-0.0002	-8e-05	-7e-05	-0.00014		1.6e-09	0.000211121	8.1e-09	3.61e-08	4e-08	6.4e-09	4.9e-09	1.96e-08
10.4	-9e-05	-3e-05	-6e-05	-0.00024	5e-05	0.00027	-2e-05	-0.00019		0.0138	0.0205	0	0	0	0	0	0		-0.01389	-0.02053	-6e-05	-0.00024	5e-05	0.00027	-2e-05	-0.00019		0.000192932	0.000421481	3.6e-09	5.76e-08	2.5e-09	7.29e-08	4e-10	3.61e-08
10.6	0.00011	-0.00013	-0.00011	-0.00024	-0.0001	-0.00013	3e-05	-0.00014		0.0198	0.0241	0.0141	0	0	0	0	0		-0.01969	-0.02423	-0.01421	-0.00024	-0.0001	-0.00013	3e-05	-0.00014		0.000387696	0.000587093	0.000201924	5.76e-08	1e-08	1.69e-08	9e-10	1.96e-08
10.8	-9e-05	0.00012	4e-05	-0.00024	-0.00015	-8e-05	-2e-05	-0.00019		0.0241	0.0269	0.0206	0	0	0	0	0		-0.02419	-0.02678	-0.02056	-0.00024	-0.00015	-8e-05	-2e-05	-0.00019		0.000585156	0.000717168	0.000422714	5.76e-08	2.25e-08	6.4e-09	4e-10	3.61e-08
11	-9e-05	0.01222	-6e-05	-0.00024	0.00015	2e-05	-2e-05	-0.00014		0.027	0.0292	0.0254	0.004	0	0	0	0		-0.02709	-0.01698	-0.02546	-0.00424	0.00015	2e-05	-2e-05	-0.00014		0.000733868	0.00028832	0.000648212	1.79776e-05	2.25e-08	4e-10	4e-10	1.96e-08
11.2	0.00856	0.01177	-6e-05	-0.00034	0	-0.00013	-7e-05	-9e-05		0.0293	0.0311	0.0285	0.0109	0	0.0144	0	0		-0.02074	-0.01933	-0.02856	-0.01124	0	-0.01453	-7e-05	-9e-05		0.000430148	0.000373649	0.000815674	0.000126338	0	0.000211121	4.9e-09	8.1e-09
11.4	0.01061	0.01367	0.00559	-0.00024	-5e-05	-8e-05	8e-05	1e-05		0.0313	0.0327	0.0309	0.017	0.0048	0.0207	0.0032	0		-0.02069	-0.01903	-0.02531	-0.01724	-0.00485	-0.02078	-0.00312	1e-05		0.000428076	0.000362141	0.000640596	0.000297218	2.35225e-05	0.000431808	9.7344e-06	1e-10
11.6	0.01181	0.02292	0.01494	-0.00024	-0.0002	2e-05	3e-05	0.00011		0.033	0.034	0.033	0.0209	0.0137	0.0244	0.0117	0		-0.02119	-0.01108	-0.01806	-0.02114	-0.0139	-0.02438	-0.01167	0.00011		0.000449016	0.000122766	0.000326164	0.0004469	0.00019321	0.000594384	0.000136189	1.21e-08
11.8	0.01331	0.03092	0.01844	-0.00029	5e-05	-0.00023	-2e-05	0.00026		0.0344	0.0352	0.0348	0.0243	0.0187	0.0277	0.019	0		-0.02109	-0.00428	-0.01636	-0.02459	-0.01865	-0.02793	-0.01902	0.00026		0.000444788	1.83184e-05	0.00026765	0.000604668	0.000347822	0.000780085	0.00036176	6.76e-08
12	0.01706	0.03382	0.01754	0.00066	0	0.00627	8e-05	0.00016		0.0356	0.0363	0.0363	0.0268	0.0219	0.0303	0.0232	0		-0.01854	-0.00248	-0.01876	-0.02614	-0.0219	-0.02403	-0.02312	0.00016		0.000343732	6.1504e-06	0.000351938	0.0006833	0.00047961	0.000577441	0.000534534	2.56e-08
12.2	0.01746	0.03642	0.01979	0.00136	-0.00015	0.01307	8e-05	0.00011		0.0366	0.0372	0.0376	0.0288	0.0243	0.0324	0.0263	0.0158		-0.01914	-0.00078	-0.01781	-0.02744	-0.02445	-0.01933	-0.02622	-0.01569		0.00036634	6.084e-07	0.000317196	0.000752954	0.000597802	0.000373649	0.000687488	0.000246176
12.4	0.02076	0.04367	0.02344	0.00266	0.0067	0.01547	0.00033	6e-05		0.0375	0.0381	0.0386	0.0303	0.0262	0.0341	0.0287	0.0204		-0.01674	0.00557	-0.01516	-0.02764	-0.0195	-0.01863	-0.02837	-0.02034		0.000280228	3.10249e-05	0.000229826	0.00076397	0.00038025	0.000347077	0.000804857	0.000413716
12.6	0.02851	0.04817	0.02414	0.01246	0.0123	0.01622	0.00098	6e-05		0.0383	0.0388	0.0396	0.0316	0.0276	0.0355	0.0304	0.0239		-0.00979	0.00937	-0.01546	-0.01914	-0.0153	-0.01928	-0.02942	-0.02384		9.58441e-05	8.77969e-05	0.000239012	0.00036634	0.00023409	0.000371718	0.000865536	0.000568346
12.8	0.03826	0.06057	0.02669	0.01386	0.01965	0.01752	0.00308	1e-05		0.0389	0.0394	0.0404	0.0326	0.0288	0.0366	0.0318	0.0267		-0.00064	0.02117	-0.01371	-0.01874	-0.00915	-0.01908	-0.02872	-0.02669		4.096e-07	0.000448169	0.000187964	0.000351188	8.37225e-05	0.000364046	0.000824838	0.000712356
13	0.04916	0.07412	0.02794	0.02156	0.02145	0.01862	0.00578	1e-05		0.0395	0.04	0.0411	0.0335	0.0298	0.0376	0.033	0.0289		0.00966	0.03412	-0.01316	-0.01194	-0.00835	-0.01898	-0.02722	-0.02889		9.33156e-05	0.00116417	0.000173186	0.000142564	6.97225e-05	0.00036024	0.000740928	0.000834632
13.2	0.06541	0.07367	0.02954	0.01996	0.0256	0.01972	0.01258	-0.00124		0.04	0.0405	0.0417	0.0343	0.0306	0.0384	0.0339	0.0306		0.02541	0.03317	-0.01216	-0.01434	-0.005	-0.01868	-0.02132	-0.03184		0.000645668	0.00110025	0.000147866	0.000205636	2.5e-05	0.000348942	0.000454542	0.00101379
13.4	0.08311	0.08617	0.03114	0.02486	0.02465	0.02162	0.01458	0.01201		0.0405	0.0409	0.0422	0.035	0.0314	0.0391	0.0348	0.0318		0.04261	0.04527	-0.01106	-0.01014	-0.00675	-0.01748	-0.02022	-0.01979		0.00181561	0.00204937	0.000122324	0.00010282	4.55625e-05	0.00030555	0.000408848	0.000391644
13.6	0.09356	0.10002	0.03409	0.02051	0.02425	0.02432	0.01683	0.01401		0.0409	0.0413	0.0427	0.0355	0.032	0.0398	0.0355	0.0328		0.05266	0.05872	-0.00861	-0.01499	-0.00775	-0.01548	-0.01867	-0.01879		0.00277308	0.00344804	7.41321e-05	0.0002247	6.00625e-05	0.00023963	0.000348569	0.000353064
13.8	0.09211	0.11207	0.03734	0.02026	0.0322	0.03217	0.01813	0.01666		0.0413	0.0416	0.0431	0.036	0.0325	0.0403	0.0361	0.0336		0.05081	0.07047	-0.00576	-0.01574	-0.0003	-0.00813	-0.01797	-0.01694		0.00258166	0.00496602	3.31776e-05	0.000247748	9e-08	6.60969e-05	0.000322921	0.000286964
14	0.08721	0.10767	0.03649	0.02336	0.02875	0.03472	0.01658	0.01921		0.0416	0.0419	0.0434	0.0364	0.033	0.0407	0.0366	0.0342		0.04561	0.06577	-0.00691	-0.01304	-0.00425	-0.00598	-0.02002	-0.01499		0.00208027	0.00432569	4.77481e-05	0.000170042	1.80625e-05	3.57604e-05	0.0004008	0.0002247
14.2	0.08866	0.08122	0.03739	0.02111	0.032	0.03662	0.02648	0.01711		0.0418	0.0422	0.0437	0.0368	0.0334	0.0411	0.037	0.0348		0.04686	0.03902	-0.00631	-0.01569	-0.0014	-0.00448	-0.01052	-0.01769		0.00219586	0.00152256	3.98161e-05	0.000246176	1.96e-06	2.00704e-05	0.00011067	0.000312936
14.4	0.06751	0.05867	0.03899	0.02611	0.0382	0.03537	0.03343	0.01686		0.042	0.0424	0.044	0.0371	0.0337	0.0415	0.0374	0.0352		0.02551	0.01627	-0.00501	-0.01099	0.0045	-0.00613	-0.00397	-0.01834		0.00065076	0.000264713	2.51001e-05	0.00012078	2.025e-05	3.75769e-05	1.57609e-05	0.000336356
14.6	0.07586	0.06127	0.03879	0.02996	0.04085	0.03697	0.02658	0.01986		0.0422	0.0426	0.0442	0.0374	0.034	0.0417	0.0377	0.0356		0.03366	0.01867	-0.00541	-0.00744	0.00685	-0.00473	-0.01112	-0.01574		0.001133	0.000348569	2.92681e-05	5.53536e-05	4.69225e-05	2.23729e-05	0.000123654	0.000247748
14.8	0.07081	0.06082	0.03624	0.02856	0.0364	0.04277	0.02558	0.02331		0.0423	0.0427	0.0444	0.0376	0.0342	0.042	0.0379	0.0359		0.02851	0.01812	-0.00816	-0.00904	0.0022	0.00077	-0.01232	-0.01259		0.00081282	0.000328334	6.65856e-05	8.17216e-05	4.84e-06	5.929e-07	0.000151782	0.000158508
15	0.05986	0.06542	0.03179	0.03486	0.04535	0.05187	0.03303	0.02011		0.0424	0.0427	0.0445	0.0377	0.0344	0.0421	0.0381	0.0362		0.01746	0.02272	-0.01271	-0.00284	0.01095	0.00977	-0.00507	-0.01609		0.000304852	0.000516198	0.000161544	8.0656e-06	0.000119903	9.54529e-05	2.57049e-05	0.000258888
15.2	0.05676	0.06552	0.03439	0.02776	0.04495	0.04847	0.03698	0.01876		0.0424	0.0427	0.0445	0.0378	0.0345	0.0422	0.0383	0.0364		0.01436	0.02282	-0.01011	-0.01004	0.01045	0.00627	-0.00132	-0.01764		0.00020621	0.000520752	0.000102212	0.000100802	0.000109202	3.93129e-05	1.7424e-06	0.00031117
15.4	0.05421	0.06997	0.03574	0.03796	0.0441	0.04777	0.03878	0.02191		0.0423	0.0426	0.0445	0.0379	0.0346	0.0423	0.0383	0.0365		0.01191	0.02737	-0.00876	6e-05	0.0095	0.00547	0.00048	-0.01459		0.000141848	0.000749117	7.67376e-05	3.6e-09	9.025e-05	2.99209e-05	2.304e-07	0.000212868
15.6	0.05036	0.06872	0.03814	0.04091	0.0384	0.04587	0.03318	0.02261		0.0422	0.0425	0.0444	0.0379	0.0346	0.0423	0.0384	0.0366		0.00816	0.02622	-0.00626	0.00301	0.0038	0.00357	-0.00522	-0.01399		6.65856e-05	0.000687488	3.91876e-05	9.0601e-06	1.444e-05	1.27449e-05	2.72484e-05	0.00019572
15.8	0.06066	0.07227	0.04424	0.03876	0.04365	0.04272	0.03988	0.02541		0.042	0.0422	0.0443	0.0378	0.0345	0.0422	0.0383	0.0366		0.01866	0.03007	-6e-05	0.00096	0.00915	0.00052	0.00158	-0.01119		0.000348196	0.000904205	3.6e-09	9.216e-07	8.37225e-05	2.704e-07	2.4964e-06	0.000125216
16	0.06731	0.07332	0.03969	0.04041	0.0455	0.04337	0.03938	0.02546		0.0417	0.042	0.0441	0.0376	0.0344	0.0421	0.0383	0.0366		0.02561	0.03132	-0.00441	0.00281	0.0111	0.00127	0.00108	-0.01114		0.000655872	0.000980942	1.94481e-05	7.8961e-06	0.00012321	1.6129e-06	1.1664e-06	0.0001241
16.2	0.06436	0.06372	0.04259	0.03921	0.0442	0.04602	0.04133	0.03281		0.0414	0.0417	0.0438	0.0375	0.0342	0.042	0.0381	0.0365		0.02296	0.02202	-0.00121	0.00171	0.01	0.00402	0.00323	-0.00369		0.000527162	0.00048488	1.4641e-06	2.9241e-06	0.0001	1.61604e-05	1.04329e-05	1.36161e-05
16.4	0.06821	0.07677	0.04159	0.04831	0.0434	0.04847	0.03748	0.03076		0.0411	0.0414	0.0435	0.0372	0.034	0.0418	0.0379	0.0364		0.02711	0.03537	-0.00191	0.01111	0.0094	0.00667	-0.00042	-0.00564		0.000734952	0.00125104	3.6481e-06	0.000123432	8.836e-05	4.44889e-05	1.764e-07	3.18096e-05
16.6	0.06966	0.08267	0.04069	0.04286	0.0529	0.05132	0.03973	0.02791		0.0408	0.041	0.0432	0.037	0.0338	0.0415	0.0377	0.0362		0.02886	0.04167	-0.00251	0.00586	0.0191	0.00982	0.00203	-0.00829		0.0008329	0.00173639	6.3001e-06	3.43396e-05	0.00036481	9.64324e-05	4.1209e-06	6.87241e-05
16.8	0.07811	0.07867	0.04249	0.04676	0.05315	0.04997	0.03463	0.02311		0.0404	0.0406	0.0429	0.0367	0.0335	0.0412	0.0375	0.036		0.03771	0.03807	-0.00041	0.01006	0.01965	0.00877	-0.00287	-0.01289		0.00142204	0.00144932	1.681e-07	0.000101204	0.000386123	7.69129e-05	8.2369e-06	0.000166152
17	0.08626	0.08157	0.03964	0.05101	0.0476	0.05247	0.04443	0.02456		0.04	0.0402	0.0425	0.0364	0.0332	0.0409	0.0372	0.0357		0.04626	0.04137	-0.00286	0.01461	0.0144	0.01157	0.00723	-0.01114		0.00213999	0.00171148	8.1796e-06	0.000213452	0.00020736	0.000133865	5.22729e-05	0.0001241
17.2	0.08441	0.08422	0.03949	0.04191	0.04965	0.04977	0.04223	0.02706		0.0396	0.0398	0.0422	0.036	0.0329	0.0406	0.0369	0.0355		0.04481	0.04442	-0.00271	0.00591	0.01675	0.00917	0.00533	-0.00844		0.00200794	0.00197314	7.3441e-06	3.49281e-05	0.000280563	8.40889e-05	2.84089e-05	7.12336e-05
17.4	0.08701	0.08477	0.03994	0.04271	0.0484	0.05367	0.04253	0.02731		0.0392	0.0394	0.0418	0.0357	0.0326	0.0403	0.0366	0.0352		0.04781	0.04537	-0.00186	0.00701	0.0158	0.01337	0.00593	-0.00789		0.0022858	0.00205844	3.4596e-06	4.91401e-05	0.00024964	0.000178757	3.51649e-05	6.22521e-05
17.6	0.07881	0.08287	0.03749	0.03821	0.04505	0.05327	0.04738	0.03041		0.0388	0.039	0.0414	0.0353	0.0322	0.0399	0.0362	0.0348		0.04001	0.04387	-0.00391	0.00291	0.01285	0.01337	0.01118	-0.00439		0.0016008	0.00192458	1.52881e-05	8.4681e-06	0.000165123	0.000178757	0.000124992	1.92721e-05
17.8	0.07731	0.08347	0.03819	0.04576	0.0425	0.05247	0.04328	0.03136		0.0383	0.0386	0.041	0.0349	0.0319	0.0396	0.0359	0.0345		0.03901	0.04487	-0.00281	0.01086	0.0106	0.01287	0.00738	-0.00314		0.00152178	0.00201332	7.8961e-06	0.00011794	0.00011236	0.000165637	5.44644e-05	9.8596e-06
18	0.07666	0.08562	0.03779	0.04756	0.0511	0.05212	0.04523	0.02721		0.0379	0.0382	0.0406	0.0346	0.0315	0.0392	0.0355	0.0342		0.03876	0.04742	-0.00281	0.01296	0.0196	0.01292	0.00973	-0.00699		0.00150234	0.00224866	7.8961e-06	0.000167962	0.00038416	0.000166926	9.46729e-05	4.88601e-05
[truncated: 210 more rows]

## Sheet: Pearson_Coore_Coe
t	S3	S4	S5	S6	S7	S8	S9	S10		time	p3	p4	p5	p6	p7	p8	p9	p10		t	HEC_P3	HEC_P4	HEC_P5	HEC_P6	HEC_P7	HEC_P8	HEC_P9	HEC_P10		HEC_1A_2_P3	HEC_1A_2_P4	HEC_1A_2_P5	HEC_1A_2_P6	HEC_1A_2_P7	HEC_1A_2_P8	HEC_1A_2_P9	HEC_1A_2_P10		HEC_1A_5_P3	HEC_1A_5_P4	HEC_1A_5_P5	HEC_1A_5_P6	HEC_1A_5_P7	HEC_1A_5_P8	HEC_1A_5_P9	HEC_1A_5_P10		HEC_Dif_P3	HEC_Dif_P4
[truncated: 1,080 more rows]
[truncated: 6 more columns]
