# Supplementary material for: Application of different building representation techniques in HEC-RAS 2-D for urban flood modeling using the Toce River experimental case
Source: PeerJ. 2021 Jul 2;9:e11667. doi: 10.7717/peerj.11667 (PMC8256810; doi:10.7717/peerj.11667)
Supplement: Supplemental Information 5 [file peerj-09-11667-s005.xlsx]

## Sheet: BB_Technique_(1B)
t	S3	S4	S5	S6	S7	S8	S9	S10		time	p3	p4	p5	p6	p7	p8	p9	p10		t	HEC_P3	HEC_P4	HEC_P5	HEC_P6	HEC_P7	HEC_P8	HEC_P9	HEC_P10		HEC_1B_2_P3	HEC_1B_2_P4	HEC_1B_2_P5	HEC_1B_2_P6	HEC_1B_2_P7	HEC_1B_2_P8	HEC_1B_2_P9	HEC_1B_2_P10		HEC_1B_5_P3	HEC_1B_5_P4	HEC_1B_5_P5	HEC_1B_5_P6	HEC_1B_5_P7	HEC_1B_5_P8	HEC_1B_5_P9	HEC_1B_5_P10			HEC_Dif_P3
0	-1e-05	-4e-05	0	-0.00015	-2e-05	-7e-05	3e-05	1e-05		6.05	0	0	0	0	0	0	0	0		0	0	0	0	0	0	0	0	0		0	0	0	0	0	0	0	0		0	0	0	0	0	0	0	0			0
0.2	-6e-05	1e-05	-5e-05	0.00015	8e-05	0.00013	-0.00017	1e-05		6.1	0	0	0	0	0	0	0	0		0.2	0	0	0	0	0	0	0	0		0	0	0	0	0	0	0	0		0	0	0	0	0	0	0	0			0
0.4	0.00014	0.00011	5e-05	5e-05	3e-05	3e-05	-2e-05	1e-05		6.15	0	0	0	0	0	0	0	0		0.4	0	0	0	0	0	0	0	0		0	0	0	0	0	0	0	0		0	0	0	0	0	0	0	0			0
0.6	-1e-05	-9e-05	-0.0001	-5e-05	-7e-05	8e-05	-2e-05	-4e-05		6.2	0	0	0	0	0	0	0	0		0.6	0	0	0	0	0	0	0	0		0	0	0	0	0	0	0	0		0	0	0	0	0	0	0	0			0
0.8	-0.00016	-4e-05	5e-05	-5e-05	-0.00012	8e-05	-2e-05	6e-05		6.25	0	0	0	0	0	0	0	0		0.8	0	0	0	0	0	0	0	0		0	0	0	0	0	0	0	0		0	0	0	0	0	0	0	0			0
1	4e-05	1e-05	0.00015	-0.00015	-0.00017	0.00018	-7e-05	1e-05		6.3	0	0	0	0	0	0	0	0		1	0	0	0	0	0	0	0	0		0	0	0	0	0	0	0	0		0	0	0	0	0	0	0	0			0
1.2	-6e-05	0.00011	-0.0001	0.0002	0.00013	8e-05	-2e-05	-4e-05		6.35	0	0	0	0	0	0	0	0		1.2	0	0	0	0	0	0	0	0		0	0	0	0	0	0	0	0		0	0	0	0	0	0	0	0			0
1.4	0.00039	-9e-05	0.00015	0	0.00013	0.00033	-7e-05	-4e-05		6.4	0	0	0	0	0	0	0	0		1.4	0	0	0	0	0	0	0	0		0	0	0	0	0	0	0	0		0	0	0	0	0	0	0	0			0
1.6	-6e-05	1e-05	5e-05	-5e-05	8e-05	3e-05	-2e-05	-4e-05		6.45	0	0	0	0	0	0	0	0		1.6	0	0	0	0	0	0	0	0		0	0	0	0	0	0	0	0		0	0	0	0	0	0	0	0			0
1.8	-0.00016	1e-05	0.0001	-5e-05	-2e-05	-2e-05	3e-05	-4e-05		6.5	0	0	0	0	0	0	0	0		1.8	0	0	0	0	0	0	0	0		0	0	0	0	0	0	0	0		0	0	0	0	0	0	0	0			0
2	9e-05	0.00011	0	-0.00015	-2e-05	-7e-05	3e-05	1e-05		6.55	0	0	0	0	0	0	0	0		2	0	0	0	0	0	0	0	0		0	0	0	0	0	0	0	0		0	0	0	0	0	0	0	0			0
2.2	-1e-05	-0.00014	0	0.00015	8e-05	-0.00017	3e-05	6e-05		6.6	0	0	0	0	0	0	0	0		2.2	0	0	0	0	0	0	0	0		0	0	0	0	0	0	0	0		0	0	0	0	0	0	0	0			0
2.4	9e-05	1e-05	-0.00015	0	-2e-05	-7e-05	8e-05	6e-05		6.65	0	0	0	0	0	0	0	0		2.4	0	0	0	0	0	0	0	0		0	0	0	0	0	0	0	0		0	0	0	0	0	0	0	0			0
2.6	-6e-05	1e-05	5e-05	0	-7e-05	-0.00022	8e-05	0.00011		6.7	0	0	0	0	0	0	0	0		2.6	0	0	0	0	0	0	0	0		0	0	0	0	0	0	0	0		0	0	0	0	0	0	0	0			0
2.8	-0.00016	0.00011	-0.0001	-5e-05	-0.00012	-0.00012	0.00013	0.00011		6.75	0	0	0	0	0	0	0	0		2.8	0	0	0	0	0	0	0	0		0	0	0	0	0	0	0	0		0	0	0	0	0	0	0	0			0
3	4e-05	-9e-05	0	-0.00015	-0.00012	-0.00017	0.00013	0.00011		6.8	0	0	0	0	0	0	0	0		3	0	0	0	0	0	0	0	0		0	0	0	0	0	0	0	0		0	0	0	0	0	0	0	0			0
3.2	-1e-05	-4e-05	-0.0001	0.00015	0.00023	-7e-05	0.00028	0.00011		6.85	0	0	0	0	0	0	0	0		3.2	0	0	0	0	0	0	0	0		0	0	0	0	0	0	0	0		0	0	0	0	0	0	0	0			0
3.4	-0.00011	-4e-05	0.0001	0	0.00013	-0.00017	3e-05	0.00036		6.9	0	0	0	0	0	0	0	0		3.4	0	0	0	0	0	0	0	0		0	0	0	0	0	0	0	0		0	0	0	0	0	0	0	0			0
3.6	-6e-05	0.00011	0.0001	0	-2e-05	-7e-05	-0.00012	0.00011		6.95	0	0	0	0	0	0	0	0		3.6	0	0	0	0	0	0	0	0		0	0	0	0	0	0	0	0		0	0	0	0	0	0	0	0			0
3.8	-0.00011	-9e-05	0	-0.0001	-2e-05	-0.00017	-0.00012	1e-05		7	0	0	0	0	0	0	0	0		3.8	0	0	0	0	0	0	0	0		0	0	0	0	0	0	0	0		0	0	0	0	0	0	0	0			0
4	9e-05	6e-05	0.0003	-0.0002	-2e-05	-7e-05	-0.00022	-9e-05		7.05	0	0	0	0	0	0	0	0		4	0	0	0	0	0	0	0	0		0	0	0	0	0	0	0	0		0	0	0	0	0	0	0	0			0
4.2	-6e-05	1e-05	-5e-05	0.0001	3e-05	-0.00017	-0.00012	-0.00014		7.1	0	0	0	0	0	0	0	0		4.2	0	0	0	0	0	0	0	0		0	0	0	0	0	0	0	0		0	0	0	0	0	0	0	0			0
4.4	-0.00016	0.00011	0.00015	0	-2e-05	3e-05	-0.00012	-0.00014		7.15	0	0	0	0	0	0	0	0		4.4	0	0	0	0	0	0	0	0		0	0	0	0	0	0	0	0		0	0	0	0	0	0	0	0			0
4.6	-6e-05	-0.00014	-5e-05	-0.0001	-7e-05	-0.00012	-7e-05	-0.00014		7.2	0	0	0	0	0	0	0	0		4.6	0	0	0	0	0	0	0	0		0	0	0	0	0	0	0	0		0	0	0	0	0	0	0	0			0
4.8	-0.00011	1e-05	0.0001	-0.0001	-0.00017	3e-05	-0.00012	-0.00014		7.25	0	0	0	0	0	0	0	0		4.8	0	0	0	0	0	0	0	0		0	0	0	0	0	0	0	0		0	0	0	0	0	0	0	0			0
5	9e-05	1e-05	-0.0001	-0.0002	-7e-05	-7e-05	-0.00012	-0.00014		7.3	0	0	0	0	0	0	0	0		5	0	0	0	0	0	0	0	0		0	0	0	0	0	0	0	0		0	0	0	0	0	0	0	0			0
5.2	-1e-05	0.00016	5e-05	0.0001	0.00013	3e-05	-7e-05	-9e-05		7.35	0	0	0	0	0	0	0	0		5.2	0	0	0	0	0	0	0	0		0	0	0	0	0	0	0	0		0	0	0	0	0	0	0	0			0
5.4	-0.00021	-0.00014	-0.0001	-5e-05	0.00013	-7e-05	-2e-05	-9e-05		7.4	0	0	0	0	0	0	0	0		5.4	0	0	0	0	0	0	0	0		0	0	0	0	0	0	0	0		0	0	0	0	0	0	0	0			0
5.6	-1e-05	1e-05	0	0	3e-05	8e-05	-2e-05	-4e-05		7.45	0	0	0	0	0	0	0	0		5.6	0	0	0	0	0	0	0	0		0	0	0	0	0	0	0	0		0	0	0	0	0	0	0	0			0
5.8	-6e-05	1e-05	-0.00015	-0.0001	-2e-05	-2e-05	3e-05	-4e-05		7.5	0	0	0	0	0	0	0	0		5.8	0	0	0	0	0	0	0	0		0	0	0	0	0	0	0	0		0	0	0	0	0	0	0	0			0
6	9e-05	0.00011	5e-05	-0.00015	-2e-05	0.00028	-2e-05	1e-05		7.55	0	0	0	0	0	0	0	0		6	0	0	0	0	0	0	0	0		0	0	0	0	0	0	0	0		0	0	0	0	0	0	0	0			0
6.2	4e-05	-9e-05	5e-05	5e-05	3e-05	-7e-05	-7e-05	-4e-05		7.6	0	0	0	0	0	0	0	0		6.2	0	0	0	0	0	0	0	0		0	0	0	0	0	0	0	0		0	0	0	0	0	0	0	0			0
6.4	-0.00016	1e-05	0.0001	-5e-05	-7e-05	-2e-05	3e-05	-9e-05		7.65	0	0	0	0	0	0	0	0		6.4	0	0	0	0	0	0	0	0		0	0	0	0	0	0	0	0		0	0	0	0	0	0	0	0			0
6.6	4e-05	1e-05	0.00035	0	-7e-05	-7e-05	-7e-05	6e-05		7.7	0	0	0	0	0	0	0	0		6.6	0	0	0	0	0	0	0	0		0	0	0	0	0	0	0	0		0	0	0	0	0	0	0	0			0
6.8	-0.00011	0.00011	0	-0.0001	-0.00012	-0.00022	-7e-05	-4e-05		7.75	0	0	0	0	0	0	0	0		6.8	0	0	0	0	0	0	0	0		0	0	0	0	0	0	0	0		0	0	0	0	0	0	0	0			0
7	9e-05	-9e-05	0.00015	-5e-05	-2e-05	-0.00017	-7e-05	-4e-05		7.8	0	0	0	0	0	0	0	0		7	0	0	0	0	0	0	0	0		0	0	0	0	0	0	0	0		0	0	0	0	0	0	0	0			0
7.2	-6e-05	1e-05	0	5e-05	0.00013	-0.00022	-7e-05	1e-05		7.85	0	0	0	0	0	0	0	0		7.2	0	0	0	0	0	0	0	0		0	0	0	0	0	0	0	0		0	0	0	0	0	0	0	0			0
7.4	-0.00016	1e-05	5e-05	-5e-05	8e-05	-0.00012	-2e-05	-4e-05		7.9	0	0	0	0	0	0	0	0		7.4	0	0	0	0	0	0	0	0		0	0	0	0	0	0	0	0		0	0	0	0	0	0	0	0			0
7.6	-1e-05	0.00016	-0.0001	0	3e-05	-0.00022	-2e-05	1e-05		7.95	0	0	0	0	0	0	0	0		7.6	0	0	0	0	0	0	0	0		0	0	0	0	0	0	0	0		0	0	0	0	0	0	0	0			0
7.8	-0.00011	-9e-05	5e-05	-0.00015	-2e-05	-7e-05	-2e-05	1e-05		8	0	0	0	0	0	0	0	0		7.8	0	0	0	0	0	0	0	0		0	0	0	0	0	0	0	0		0	0	0	0	0	0	0	0			0
8	0.00029	1e-05	-0.00015	0.00015	3e-05	-0.00022	-2e-05	1e-05		8.05	0	0	0	0	0	0	0	0		8	0	0	0	0	0	0	0	0		0	0	0	0	0	0	0	0		0	0	0	0	0	0	0	0			0
8.2	-0.00011	1e-05	0	0.0001	-2e-05	-7e-05	3e-05	1e-05		8.1	0	0	0	0	0	0	0	0		8.2	0	0	0	0	0	0	0	0		0	0	0	0	0	0	0	0		0	0	0	0	0	0	0	0			0
8.4	-0.00016	0.00021	-0.0002	-5e-05	-2e-05	-0.00022	3e-05	6e-05		8.15	0	0	0	0	0	0	0	0		8.4	0	0	0	0	0	0	0	0		0	0	0	0	0	0	0	0		0	0	0	0	0	0	0	0			0
8.6	-1e-05	-0.00014	5e-05	-5e-05	-0.00012	3e-05	8e-05	0.00011		8.2	0	0	0	0	0	0	0	0		8.6	0	0	0	0	0	0	0	0		0	0	0	0	0	0	0	0		0	0	0	0	0	0	0	0			0
8.8	-6e-05	-4e-05	-5e-05	-0.00015	-0.00017	-0.00017	8e-05	6e-05		8.25	0	0	0	0	0	0	0	0		8.8	0	0	0	0	0	0	0	0		0	0	0	0	0	0	0	0		0	0	0	0	0	0	0	0			0
9	4e-05	1e-05	5e-05	0.00025	3e-05	-2e-05	0.00028	0.00011		8.3	0	0	0	0	0	0	0	0		9	0	0	0	0	0	0	0	0		0	0	0	0	0	0	0	0		0	0	0	0	0	0	0	0			0
9.2	-0.00011	0.00031	0.00035	5e-05	8e-05	-0.00012	3e-05	0.00016		8.35	0	0	0	0	0	0	0	0		9.2	0	0	0	0	0	0	0	0		0	0	0	0	0	0	0	0		0	0	0	0	0	0	0	0			0
9.4	-0.00016	-0.00014	-5e-05	-5e-05	3e-05	-2e-05	-7e-05	0.00016		8.4	0	0	0	0	0	0	0	0		9.4	0	0	0	0	0	0	0	0		0	0	0	0	0	0	0	0		0	0	0	0	0	0	0	0			0
9.6	4e-05	-0.00024	0.0001	-5e-05	-2e-05	-0.00012	-0.00017	6e-05		8.45	0	0	0	0	0	0	0	0		9.6	0	0	0	0	0	0	0	0		0	0	0	0	0	0	0	0		0	0	0	0	0	0	0	0			0
9.8	-1e-05	1e-05	-5e-05	-0.00015	-7e-05	8e-05	-0.00012	-0.00014		8.5	0	0	0	0	0	0	0	0		9.8	0	0	0	0	0	0	0	0		0	0	0	0	0	0	0	0		0	0	0	0	0	0	0	0			0
10	-0.00011	0.00041	0	0.0001	3e-05	-7e-05	-0.00017	-0.00019		8.55	0	0	0	0	0	0	0	0		10	0	0	0	0	0	0	0	0		0	0	0	0	0	0	0	0		0	0	0	0	0	0	0	0			0
10.2	-0.00011	-4e-05	-0.0001	-5e-05	-2e-05	0.00023	-0.00017	-0.00019		8.6	0	0	0	0	0	0	0	0		10.2	0	0	0	0	0	0	0	0		0	0	0	0	0	0	0	0		0	0	0	0	0	0	0	0			0
10.4	-0.00016	-0.00024	5e-05	-5e-05	-2e-05	-0.00012	-0.00017	-0.00014		8.65	0	0	0	0	0	0	0	0		10.4	0	0	0	0	0	0	0	0		0	0	0	0	0	0	0	0		0	0	0	0	0	0	0	0			0
10.6	4e-05	1e-05	-0.00015	-5e-05	-0.00012	-0.00012	-0.00012	-0.00019		8.7	0	0	0	0	0	0	0	0		10.6	0	0	0	0	0	0	0	0		0	0	0	0	0	0	0	0		0	0	0	0	0	0	0	0			0
10.8	-6e-05	0.00066	-5e-05	-0.0002	-0.00017	-0.00017	-0.00012	-0.00014		8.75	0	0	0	0	0	0	0	0		10.8	0	0	0	0	0	0	0	0		0	0	0	0	0	0	0	0		0	0	0	0	0	0	0	0			0
11	-0.00016	0.01081	-0.00015	0.0001	0.00013	-0.00027	-7e-05	-0.00014		8.8	0	0	0	0	0	0	0	0		11	0	0	0	0	0	0	0	0		0	0	0	0	0	0	0	0		0	0	0	0	0	0	0	0			0
11.2	0.00204	0.01051	5e-05	0	8e-05	-0.00012	-7e-05	-9e-05		8.85	0	0	0	0	0	0	0	0		11.2	0	0	0	0	0	0	0	0		0	0	0	0	0	0	0	0		0	0	0	0	0	0	0	0			0.0121
11.4	0.00929	0.01211	0.00365	0	3e-05	-0.00032	-7e-05	-9e-05		8.9	0	0	0	0	0	0	0	0		11.4	0	0.0038	0	0	0	0	0	0		0	0	0	0	0	0	0	0		0	0	0	0	0	0	0	0			0.0182
11.6	0.01154	0.01786	0.01275	-0.0001	3e-05	-0.00017	-2e-05	-4e-05		8.95	0	0	0	0	0	0	0	0		11.6	0	0.0322	0	0	0	0	0	0		0	0.0392	0	0	0	0	0	0		0	0.03	0	0	0	0	0	0			0.0225
11.8	0.01224	0.02656	0.01795	-0.0002	-0.00012	-0.00027	-2e-05	-4e-05		9	0	0	0	0	0	0	0	0		11.8	0.035	0.0706	0	0	0	0	0	0		0.0339	0.0735	0	0	0	0	0	0		0.007	0.045	0	0	0	0	0	0			0.0254
12	0.01389	0.03236	0.0167	0.0028	-0.00012	-0.00017	-0.00017	-4e-05		9.05	0	0	0	0	0	0	0	0		12	0.0545	0.0708	0.0386	0	0	0	0	0		0.0369	0.0715	0	0	0	0	0	0		0.0381	0.0633	0	0	0	0	0	0			0.0277
12.2	0.01684	0.03216	0.01835	0.00595	-7e-05	-0.00022	-2e-05	-0.00019		9.1	0	0	0	0	0	0	0	0		12.2	0.0531	0.0672	0.028	0	0	0	0	0		0.0533	0.0677	0.03	0	0	0	0	0		0.0506	0.0698	0.0405	0	0	0	0	0			0.0296
12.4	0.01794	0.03646	0.0221	0.00635	0.00508	0.00563	-7e-05	1e-05		9.15	0	0	0	0	0	0	0	0		12.4	0.0507	0.0689	0.0522	0	0	0	0	0		0.0494	0.0615	0.0688	0	0	0	0	0		0.0566	0.0677	0.0522	0	0	0	0	0			0.0312
12.6	0.01994	0.03596	0.0244	0.0134	0.00718	0.01163	-7e-05	1e-05		9.2	0	0	0	0	0	0	0	0		12.6	0.052	0.0741	0.0475	0.0151	0	0	0	0		0.0535	0.0638	0.045	0	0	0	0	0		0.0604	0.0672	0.0633	0	0	0	0	0			0.0325
12.8	0.02579	0.04336	0.0287	0.01565	0.00888	0.01123	-7e-05	-4e-05		9.25	0	0	0	0	0	0	0	0		12.8	0.0612	0.0781	0.0432	0.0192	0	0.0137	0	0		0.0547	0.0715	0.0453	0.0209	0	0	0	0		0.0615	0.0665	0.0558	0.0247	0	0	0	0			0.0337
13	0.03714	0.05026	0.03785	0.01655	0.00933	0.02568	0.00263	-4e-05		9.3	0	0	0	0	0	0	0	0		13	0.0603	0.0792	0.0753	0.0175	0.0151	0.0102	0	0		0.057	0.0767	0.0513	0.0168	0	0.0135	0	0		0.0601	0.0652	0.056	0.024	0	0.0213	0	0			0.0346
13.2	0.04459	0.05761	0.0466	0.01715	0.00873	0.03688	0.00498	-4e-05		9.35	0	0	0	0	0	0	0	0		13.2	0.0587	0.0777	0.0724	0.0403	0.0107	0.0268	0	0		0.0596	0.0787	0.065	0.0292	0.0126	0.0301	0	0		0.0579	0.0668	0.0618	0.0384	0.0164	0.0359	0	0			0.0355
13.4	0.04989	0.06971	0.0498	0.02405	0.01243	0.03593	0.00293	-4e-05		9.4	0	0	0	0	0	0	0	0		13.4	0.0645	0.08	0.0693	0.0311	0.0112	0.0278	0.0078	0		0.0608	0.0795	0.0659	0.0328	0.0106	0.0272	0.0081	0		0.0567	0.0689	0.0623	0.0334	0.0205	0.0359	0.0109	0			0.0362
13.6	0.06959	0.07761	0.0514	0.02615	0.01448	0.03508	0.00383	0.00116		9.45	0	0	0	0	0	0	0	0		13.6	0.064	0.0832	0.0679	0.0248	0.0116	0.0345	0.0049	0		0.0617	0.0809	0.066	0.0331	0.0144	0.0336	0.007	0		0.0564	0.0718	0.0615	0.0374	0.023	0.0353	0.0112	0			0.0368
13.8	0.07604	0.09786	0.0611	0.0335	0.01423	0.03808	0.00793	0.00371		9.5	0	0	0	0	0	0	0	0		13.8	0.0713	0.0853	0.0666	0.0328	0.0114	0.0328	0.0071	0		0.0614	0.0805	0.0657	0.0365	0.0172	0.0376	0.0085	0		0.0556	0.0744	0.0625	0.0426	0.0239	0.0384	0.0126	0			0.0373
14	0.07349	0.09986	0.0654	0.03585	0.01748	0.04083	0.01478	0.00296		9.55	0	0	0	0	0	0	0	0		14	0.0711	0.0859	0.0708	0.0313	0.0309	0.0315	0.0199	0		0.0643	0.0824	0.067	0.0398	0.0311	0.0361	0.013	0		0.0554	0.0766	0.0633	0.0449	0.0334	0.0377	0.0258	0			0.0378
14.2	0.07234	0.09626	0.0739	0.0494	0.01353	0.03683	0.01713	0.00521		9.6	0	0	0	0	0	0	0	0		14.2	0.0715	0.0859	0.0744	0.0395	0.0318	0.0332	0.02	0		0.066	0.082	0.0681	0.0406	0.0318	0.0368	0.0204	0		0.0588	0.0768	0.0636	0.0499	0.0346	0.038	0.031	0.0085			0.0382
14.4	0.07174	0.07411	0.0755	0.05075	0.01613	0.03723	0.01978	0.01086		9.65	0	0	0	0	0	0	0	0		14.4	0.072	0.0853	0.0746	0.0426	0.0297	0.0368	0.03	0.0129		0.0674	0.082	0.0697	0.0526	0.0319	0.0373	0.0263	0.0093		0.062	0.0792	0.0642	0.0504	0.0345	0.0426	0.0334	0.012			0.0385
14.6	0.06834	0.06826	0.077	0.0545	0.02118	0.03538	0.02338	0.01176		9.7	0	0	0	0	0	0	0	0		14.6	0.0708	0.0853	0.0746	0.0447	0.0307	0.0344	0.025	0.0197		0.0689	0.082	0.072	0.0499	0.0327	0.04	0.0289	0.0227		0.0634	0.0774	0.0647	0.0502	0.0342	0.0448	0.0347	0.0199			0.0388
14.8	0.06979	0.06686	0.071	0.05585	0.02933	0.04408	0.01983	0.00971		9.75	0	0	0	0	0	0	0	0		14.8	0.0704	0.0852	0.0745	0.0516	0.0303	0.0363	0.0271	0.0146		0.0691	0.0832	0.0724	0.05	0.0336	0.0417	0.0308	0.0187		0.0638	0.0808	0.0665	0.0519	0.0353	0.0464	0.0388	0.0203			0.0391
15	0.06729	0.05431	0.0706	0.05295	0.02458	0.04708	0.02123	0.00966		9.8	0	0	0	0	0	0	0	0		15	0.071	0.0865	0.0756	0.0462	0.0313	0.0363	0.0301	0.0137		0.0683	0.0826	0.0731	0.0519	0.0334	0.0425	0.0331	0.017		0.0642	0.0811	0.0688	0.0536	0.0362	0.0472	0.0385	0.0226			0.0394
15.2	0.05639	0.06126	0.0714	0.05065	0.02568	0.04873	0.02823	0.01201		9.85	0	0	0	0	0	0	0	0		15.2	0.0707	0.087	0.0752	0.0437	0.032	0.039	0.0318	0.0161		0.0684	0.0836	0.0738	0.0502	0.0337	0.0442	0.034	0.0168		0.0644	0.0823	0.0707	0.0542	0.0375	0.0476	0.0381	0.0243			0.0396
15.4	0.05179	0.05901	0.07695	0.0519	0.02878	0.04558	0.02578	0.01696		9.9	0	0	0	0	0	0	0	0		15.4	0.0727	0.0885	0.073	0.0463	0.0337	0.0398	0.0313	0.0197		0.0674	0.0843	0.0743	0.05	0.0342	0.0458	0.035	0.0187		0.0644	0.0822	0.0713	0.0543	0.0393	0.0482	0.0381	0.025			0.0398
15.6	0.04294	0.05846	0.07595	0.06815	0.03343	0.04438	0.02938	0.01666		9.95	0	0	0	0	0	0	0	0		15.6	0.0735	0.0897	0.0721	0.046	0.0344	0.04	0.0317	0.0223		0.0679	0.0838	0.0736	0.0495	0.0356	0.0462	0.0369	0.021		0.064	0.0823	0.0723	0.0544	0.0403	0.0485	0.0391	0.0239			0.0399
15.8	0.05719	0.06526	0.0763	0.06585	0.03823	0.04713	0.02868	0.01861		10	0	0	0	0	0	0	0	0		15.8	0.0754	0.0889	0.0726	0.0473	0.0345	0.043	0.0341	0.0177		0.0693	0.0838	0.0731	0.0492	0.0369	0.0457	0.0372	0.0222		0.0646	0.0815	0.0731	0.0545	0.041	0.0493	0.0404	0.0245			0.0401
16	0.05904	0.06071	0.0817	0.0582	0.03218	0.05343	0.03658	0.01636		10.05	0	0	0	0	0	0	0	0		16	0.0742	0.09	0.0754	0.0509	0.0349	0.0455	0.0375	0.0168		0.0718	0.0837	0.0729	0.0504	0.0399	0.0459	0.0387	0.0214		0.0654	0.0811	0.0725	0.0561	0.0412	0.0508	0.0414	0.0238			0.0402
16.2	0.06914	0.06146	0.0814	0.06375	0.02833	0.05068	0.03503	0.02056		10.1	0	0	0	0	0	0	0	0		16.2	0.0744	0.0909	0.0774	0.0525	0.0342	0.0484	0.0387	0.018		0.0725	0.0839	0.0735	0.0525	0.0409	0.0467	0.0395	0.0215		0.0663	0.0807	0.0727	0.0575	0.042	0.0513	0.042	0.0243			0.0402
16.4	0.06989	0.07661	0.0782	0.05895	0.03993	0.05153	0.03643	0.01381		10.15	0	0	0	0	0	0	0	0		16.4	0.0747	0.0903	0.079	0.0523	0.0372	0.0495	0.0415	0.0208		0.0721	0.0846	0.0743	0.054	0.042	0.0484	0.0404	0.022		0.0672	0.081	0.0728	0.058	0.0426	0.0518	0.0422	0.0244			0.0402
16.6	0.07379	0.06681	0.082	0.0592	0.04083	0.05138	0.03693	0.01701		10.2	0	0	0	0	0	0	0	0		16.6	0.076	0.0922	0.0783	0.0529	0.0412	0.0502	0.0425	0.0213		0.0725	0.0861	0.0754	0.0553	0.0425	0.0505	0.0426	0.0225		0.0675	0.0828	0.073	0.0588	0.0432	0.0525	0.0425	0.0246			0.0402
16.8	0.07604	0.08126	0.07955	0.06915	0.04373	0.05268	0.03763	0.02261		10.25	0	0	0	0	0	0	0	0		16.8	0.0767	0.0918	0.0775	0.0559	0.0438	0.0499	0.0447	0.0215		0.0727	0.0873	0.0762	0.0566	0.0432	0.0515	0.0438	0.0228		0.0688	0.0831	0.0743	0.0589	0.0438	0.0526	0.0433	0.0246			0.0401
17	0.07794	0.07866	0.0755	0.06865	0.04203	0.05548	0.04463	0.02211		10.3	0	0	0	0	0	0	0	0		17	0.0774	0.0913	0.0765	0.0575	0.0461	0.0499	0.0434	0.0215		0.0727	0.0871	0.0764	0.0577	0.0434	0.0517	0.0448	0.023		0.0691	0.0833	0.0756	0.0593	0.044	0.0537	0.0434	0.0247			0.04
17.2	0.07469	0.07716	0.08105	0.06565	0.03713	0.05258	0.04333	0.01911		10.35	0	0.001	0	0	0	0	0	0		17.2	0.0778	0.0922	0.0767	0.0575	0.0457	0.0525	0.0438	0.0211		0.0731	0.0869	0.0763	0.0584	0.0438	0.0525	0.045	0.0227		0.0696	0.083	0.0759	0.0603	0.0445	0.0545	0.0443	0.0252			0.0398
17.4	0.07719	0.07941	0.082	0.06695	0.04623	0.05003	0.04313	0.01546		10.4	0	0.004	0	0	0	0	0	0		17.4	0.0775	0.0923	0.0774	0.0593	0.0447	0.0538	0.0457	0.0214		0.0736	0.0861	0.0763	0.0593	0.0446	0.0535	0.0453	0.0231		0.0698	0.0833	0.076	0.061	0.0452	0.0551	0.045	0.0256			0.0396
17.6	0.07644	0.08206	0.08045	0.06735	0.04683	0.05058	0.04453	0.02236		10.45	0	0.008	0	0	0	0	0	0		17.6	0.0767	0.0917	0.0793	0.0578	0.0444	0.0532	0.0468	0.0204		0.0745	0.086	0.0761	0.0598	0.0454	0.0537	0.0459	0.0235		0.07	0.0825	0.0761	0.0614	0.046	0.0552	0.0455	0.0259			0.0393
17.8	0.07539	0.08211	0.07425	0.06775	0.04773	0.05263	0.04663	0.02091		10.5	0	0.01	0	0	0	0	0	0		17.8	0.0772	0.0911	0.0795	0.0554	0.0447	0.0519	0.0474	0.0214		0.0741	0.0864	0.0761	0.0598	0.0463	0.0531	0.0464	0.0241		0.0698	0.0804	0.0758	0.0614	0.0464	0.055	0.0461	0.0262			0.0391
18	0.07459	0.07896	0.0725	0.0722	0.04173	0.05813	0.04513	0.01526		10.55	0	0.012	0	0	0	0	0	0		18	0.0762	0.0904	0.0789	0.0548	0.0464	0.05	0.0467	0.0254		0.074	0.0856	0.0771	0.0591	0.0464	0.0522	0.0468	0.024		0.0693	0.079	0.0755	0.061	0.0464	0.0549	0.0461	0.0264			0.0388
18.2	0.07589	0.07516	0.0737	0.06995	0.04483	0.06038	0.04253	0.01886		10.6	0	0.014	0	0	0	0	0	0		18.2	0.077	0.0895	0.0782	0.055	0.05	0.0488	0.0457	0.0229		0.074	0.0851	0.0781	0.0585	0.0462	0.0516	0.0465	0.0239		0.0691	0.0777	0.0747	0.0607	0.0462	0.0547	0.0463	0.0264			0.0384
18.4	0.07639	0.07616	0.07315	0.06665	0.04868	0.05143	0.04403	0.01781		10.65	0	0.015	0	0	0	0	0	0		18.4	0.0766	0.0891	0.0767	0.0574	0.0518	0.0492	0.0464	0.0219		0.073	0.0854	0.077	0.0586	0.0461	0.0521	0.0463	0.0241		0.0685	0.0769	0.0738	0.0603	0.0458	0.0547	0.0461	0.0263			0.0381
18.6	0.07719	0.07821	0.0766	0.0661	0.04678	0.05363	0.05088	0.01821		10.7	0.003	0.016	0	0	0	0	0	0		18.6	0.0765	0.0887	0.076	0.0611	0.0505	0.0505	0.0472	0.0223		0.073	0.0851	0.0761	0.0593	0.0459	0.0529	0.0467	0.0243		0.0677	0.0758	0.0732	0.0599	0.0455	0.0541	0.046	0.0264			0.0377
18.8	0.07559	0.07751	0.07355	0.0696	0.04058	0.05628	0.04728	0.02026		10.75	0.006	0.017	0	0	0	0	0	0		18.8	0.0753	0.0883	0.0759	0.0622	0.0476	0.0529	0.048	0.0224		0.0727	0.0844	0.0764	0.06	0.0457	0.0532	0.047	0.0242		0.0667	0.0748	0.0724	0.0594	0.0453	0.054	0.0457	0.0265			0.0373
19	0.07604	0.07886	0.075	0.066	0.04123	0.05663	0.04368	0.01861		10.8	0.009	0.018	0	0	0	0	0	0		19	0.0746	0.0876	0.0763	0.0609	0.0456	0.0535	0.0484	0.0236		0.0719	0.0825	0.076	0.0604	0.0458	0.0533	0.0475	0.0246		0.0658	0.0734	0.0719	0.059	0.0452	0.0537	0.0454	0.0266			0.0369
19.2	0.07449	0.07701	0.07315	0.0656	0.04068	0.05543	0.04853	0.01326		10.85	0.011	0.019	0	0	0	0	0	0		19.2	0.0742	0.0864	0.0762	0.0591	0.0447	0.0529	0.0478	0.0215		0.0713	0.0803	0.0751	0.0605	0.0462	0.0531	0.0473	0.0246		0.0652	0.0723	0.0713	0.0586	0.0449	0.0532	0.0452	0.0265			0.0365
19.4	0.07524	0.08196	0.06975	0.06485	0.04548	0.04843	0.04173	0.01371		10.9	0.013	0.02	0	0	0	0	0	0		19.4	0.0726	0.0849	0.076	0.057	0.0451	0.0504	0.0475	0.021		0.0705	0.0786	0.0742	0.0603	0.0466	0.0528	0.0468	0.0247		0.0644	0.071	0.0704	0.058	0.0444	0.0529	0.0451	0.0265			0.0361
19.6	0.07454	0.08271	0.0712	0.07045	0.04978	0.04818	0.04498	0.01971		10.95	0.014	0.021	0	0	0	0	0	0		19.6	0.0721	0.0841	0.0751	0.0554	0.0466	0.0482	0.0468	0.0222		0.07	0.0773	0.0734	0.0595	0.0463	0.0523	0.0466	0.0245		0.0639	0.0695	0.0696	0.0573	0.0438	0.0524	0.0449	0.0264			0.0357
19.8	0.07154	0.07421	0.07345	0.0698	0.04628	0.05408	0.04433	0.02181		11	0.016	0.021	0	0	0	0	0	0		19.8	0.0725	0.0825	0.0737	0.0552	0.0487	0.0473	0.0465	0.0234		0.0689	0.0763	0.0731	0.0584	0.0455	0.0515	0.0462	0.0244		0.0634	0.0689	0.0688	0.0566	0.0433	0.0519	0.0447	0.0263			0.0353
20	0.07534	0.07441	0.0734	0.0655	0.04163	0.05608	0.04308	0.01561		11.05	0.017	0.023	0.001	0	0	0	0	0		20	0.072	0.0808	0.073	0.0563	0.0491	0.0478	0.0455	0.0248		0.0678	0.0757	0.0723	0.0575	0.0448	0.0512	0.046	0.0243		0.0634	0.0686	0.0681	0.0559	0.0428	0.0515	0.0442	0.0261			0.0349
20.2	0.07239	0.07361	0.0747	0.0646	0.04013	0.05683	0.04483	0.01146		11.1	0.018	0.027	0.005	0	0	0	0	0		20.2	0.0712	0.0805	0.0724	0.057	0.0473	0.0503	0.0447	0.021		0.0675	0.074	0.0715	0.0573	0.0442	0.0512	0.046	0.0243		0.0634	0.068	0.0679	0.055	0.0421	0.0508	0.0438	0.026			0.0345
20.4	0.07379	0.06721	0.0711	0.05895	0.04153	0.05318	0.04933	0.01681		11.15	0.019	0.03	0.009	0	0	0	0	0		20.4	0.0707	0.0798	0.0722	0.0574	0.0451	0.0525	0.0444	0.0194		0.0667	0.0724	0.0704	0.0572	0.0437	0.0514	0.0457	0.0241		0.0631	0.0669	0.0677	0.0543	0.0415	0.0502	0.0433	0.0257			0.0341
20.6	0.07119	0.07326	0.06915	0.0593	0.04378	0.05418	0.05028	0.02081		11.2	0.02	0.034	0.012	0	0	0	0	0		20.6	0.0704	0.0789	0.0724	0.0567	0.0444	0.0525	0.0453	0.0207		0.0652	0.071	0.0691	0.0568	0.043	0.0519	0.0456	0.0241		0.0626	0.0656	0.0673	0.0539	0.041	0.05	0.0427	0.0254			0.0338
20.8	0.06954	0.06861	0.067	0.06415	0.04213	0.04708	0.04323	0.02661		11.25	0.021	0.037	0.014	0	0	0	0	0		20.8	0.0693	0.0789	0.0721	0.056	0.0453	0.0511	0.0461	0.0224		0.0644	0.0694	0.0682	0.0563	0.0426	0.0515	0.0455	0.0238		0.0617	0.0647	0.0665	0.0537	0.0408	0.0499	0.0424	0.0253			0.0334
21	0.07104	0.06891	0.0694	0.0638	0.03858	0.04653	0.04183	0.01881		11.3	0.022	0.04	0.015	0	0	0	0	0		21	0.0686	0.0787	0.0716	0.0559	0.0465	0.0493	0.0463	0.0245		0.0632	0.0676	0.0673	0.0557	0.0426	0.0505	0.045	0.0241		0.0609	0.0638	0.0658	0.0534	0.0405	0.0495	0.0421	0.0251			0.0331
21.2	0.06999	0.07491	0.0691	0.0642	0.03958	0.05513	0.03598	0.01566		11.35	0.023	0.043	0.016	0	0	0	0	0		21.2	0.0682	0.079	0.0712	0.0558	0.0467	0.0488	0.0458	0.0212		0.0621	0.0668	0.066	0.055	0.0427	0.0493	0.0447	0.0242		0.06	0.0628	0.0651	0.0528	0.0402	0.0487	0.0418	0.0251			0.0328
21.4	0.07214	0.07586	0.07055	0.06075	0.03943	0.05383	0.04308	0.01196		11.4	0.024	0.045	0.018	0	0	0	0	0		21.4	0.0685	0.0785	0.0701	0.056	0.0461	0.049	0.0455	0.0191		0.0606	0.0668	0.0648	0.0542	0.0425	0.0483	0.0443	0.0242		0.0595	0.0617	0.0645	0.0521	0.0397	0.0481	0.0415	0.0249			0.0325
21.6	0.06904	0.07771	0.06605	0.06015	0.04333	0.05838	0.04688	0.02446		11.45	0.025	0.048	0.019	0	0	0	0	0		21.6	0.0686	0.0777	0.0692	0.0565	0.0449	0.0498	0.0464	0.0208		0.0605	0.0662	0.0645	0.0533	0.0418	0.0478	0.0437	0.0236		0.0595	0.0609	0.0637	0.0516	0.0393	0.0479	0.041	0.0248			0.0322
21.8	0.07029	0.07616	0.06255	0.0651	0.04113	0.06003	0.03923	0.02151		11.5	0.027	0.05	0.02	0	0	0	0	0		21.8	0.0679	0.0778	0.0692	0.056	0.0436	0.0501	0.0469	0.0207		0.0604	0.0661	0.0644	0.0527	0.0409	0.0478	0.0432	0.0231		0.0592	0.0607	0.0629	0.0514	0.0391	0.0477	0.0408	0.0246			0.0319
22	0.07089	0.07106	0.06435	0.0636	0.04313	0.05838	0.04068	0.01936		11.55	0.029	0.052	0.02	0	0	0	0	0		22	0.0668	0.078	0.0685	0.0546	0.0436	0.0498	0.0456	0.0218		0.0599	0.0656	0.0639	0.0524	0.0399	0.0478	0.0427	0.0231		0.0588	0.0615	0.0626	0.0512	0.0389	0.0473	0.0406	0.0244			0.0316
22.2	0.06834	0.07046	0.066	0.0598	0.04088	0.05353	0.04358	0.01711		11.6	0.032	0.054	0.021	0	0	0	0	0		22.2	0.0665	0.0773	0.0683	0.0532	0.0444	0.0488	0.044	0.0231		0.0597	0.0651	0.0631	0.0524	0.0391	0.0479	0.0422	0.023		0.0589	0.0622	0.0631	0.0508	0.0386	0.0471	0.0405	0.0244			0.0314
22.4	0.06949	0.06626	0.0657	0.05925	0.04278	0.05308	0.04333	0.01441		11.65	0.034	0.056	0.022	0	0	0	0	0		22.4	0.066	0.0764	0.0678	0.0526	0.0452	0.0479	0.0432	0.0209		0.0593	0.0646	0.0626	0.0522	0.0385	0.0476	0.042	0.0229		0.0588	0.0619	0.0634	0.0505	0.0383	0.0469	0.0403	0.0243			0.0311
22.6	0.07089	0.06746	0.06935	0.05665	0.03878	0.05078	0.04423	0.02361		11.7	0.038	0.058	0.023	0	0	0	0	0		22.6	0.0658	0.0755	0.0664	0.053	0.0455	0.0469	0.0434	0.0204		0.0586	0.0648	0.0627	0.0517	0.0382	0.0469	0.0414	0.0226		0.0585	0.0615	0.0631	0.0504	0.0382	0.047	0.0401	0.0241			0.0309
22.8	0.06644	0.07401	0.0648	0.0571	0.04023	0.05058	0.04053	0.01746		11.75	0.041	0.059	0.024	0	0	0	0	0		22.8	0.0655	0.0746	0.0657	0.0536	0.0446	0.0464	0.0439	0.0212		0.0587	0.0649	0.0626	0.051	0.0381	0.0462	0.0411	0.0227		0.0582	0.0615	0.0627	0.0504	0.0381	0.0471	0.0399	0.0239			0.0307
23	0.06524	0.07656	0.0654	0.05625	0.03798	0.05318	0.04303	0.01061		11.8	0.045	0.06	0.025	0.001	0	0	0	0		23	0.0648	0.0743	0.0654	0.0538	0.0431	0.0471	0.0438	0.0215		0.059	0.0649	0.0625	0.0507	0.0377	0.0457	0.0406	0.0224		0.058	0.0616	0.0626	0.0503	0.038	0.0471	0.0399	0.0237			0.0304
23.2	0.06684	0.06801	0.0666	0.05545	0.03818	0.05503	0.04333	0.01031		11.85	0.047	0.061	0.026	0.002	0	0	0	0		23.2	0.0645	0.0742	0.0653	0.0543	0.0415	0.0486	0.0435	0.0221		0.0596	0.0658	0.0625	0.0506	0.0377	0.0456	0.0404	0.0224		0.0581	0.0616	0.0625	0.0501	0.0378	0.0468	0.0398	0.0236			0.0302
23.4	0.06749	0.06561	0.0653	0.05875	0.03633	0.05293	0.04268	0.02256		11.9	0.048	0.062	0.027	0.003	0	0	0	0		23.4	0.0639	0.0736	0.0652	0.0552	0.0408	0.05	0.0433	0.0203		0.0598	0.0687	0.0626	0.0506	0.0376	0.0454	0.0402	0.0221		0.0587	0.0626	0.0622	0.05	0.0377	0.0465	0.0397	0.0236			0.03
23.6	0.06504	0.07021	0.06115	0.0582	0.03853	0.05563	0.04208	0.02041		11.95	0.049	0.063	0.028	0.004	0	0	0	0		23.6	0.0637	0.0732	0.0651	0.0548	0.0409	0.0499	0.0433	0.0186		0.0612	0.0718	0.0641	0.0506	0.0375	0.0451	0.0401	0.0224		0.0597	0.0639	0.0623	0.05	0.0378	0.0465	0.0396	0.0235			0.0299
23.8	0.06874	0.07411	0.06305	0.0586	0.04158	0.05278	0.04243	0.01661		12	0.05	0.064	0.029	0.006	0	0	0	0		23.8	0.0631	0.0729	0.0643	0.0539	0.0419	0.0488	0.0434	0.0206		0.0628	0.0736	0.0669	0.0508	0.0373	0.0449	0.0401	0.0223		0.0604	0.0645	0.0632	0.0503	0.0379	0.0466	0.0395	0.0234			0.0297
24	0.06689	0.06471	0.06545	0.05555	0.04188	0.05123	0.03843	0.00986		12.05	0.05	0.064	0.031	0.009	0	0.002	0	0		24	0.0625	0.0726	0.0633	0.0527	0.043	0.0475	0.0435	0.0226		0.064	0.0734	0.0697	0.0512	0.0372	0.0449	0.0397	0.022		0.0604	0.0645	0.0642	0.0507	0.038	0.0467	0.0395	0.0234			0.0295
24.2	0.06409	0.06531	0.06645	0.0547	0.03703	0.04948	0.04063	0.01856		12.1	0.05	0.065	0.033	0.012	0	0.005	0	0		24.2	0.0621	0.072	0.0629	0.0515	0.0438	0.0464	0.0433	0.0233		0.0649	0.0719	0.0702	0.0522	0.0374	0.0459	0.0393	0.0219		0.0599	0.064	0.0647	0.0511	0.0381	0.0472	0.0396	0.0235			0.0294
24.4	0.06729	0.06831	0.06305	0.06185	0.03923	0.04773	0.04248	0.02091		12.15	0.051	0.065	0.035	0.013	0	0.007	0	0		24.4	0.0619	0.0708	0.0624	0.0504	0.0439	0.0462	0.0435	0.022		0.0653	0.0703	0.0696	0.0535	0.038	0.0471	0.0396	0.0218		0.0589	0.0633	0.0643	0.0515	0.0383	0.0478	0.0398	0.0235			0.0292
24.6	0.06259	0.06556	0.06345	0.05655	0.03968	0.04873	0.04198	0.01986		12.2	0.051	0.065	0.037	0.014	0	0.009	0	0		24.6	0.0616	0.0704	0.0619	0.0505	0.0431	0.0468	0.044	0.0201		0.065	0.069	0.0694	0.0541	0.0384	0.0475	0.04	0.0218		0.058	0.0642	0.0634	0.0515	0.0384	0.048	0.04	0.0235			0.0291
24.8	0.06304	0.06886	0.064	0.0549	0.04048	0.05008	0.03963	0.01441		12.25	0.051	0.066	0.04	0.015	0	0.009	0	0		24.8	0.0611	0.0703	0.0615	0.0507	0.042	0.0471	0.044	0.0205		0.0643	0.0683	0.0689	0.0535	0.0384	0.0472	0.0403	0.0223		0.0585	0.0661	0.0629	0.0512	0.0382	0.0476	0.0401	0.0236			0.0289
25	0.06314	0.06851	0.06165	0.05555	0.04273	0.04753	0.03973	0.01156		12.3	0.052	0.066	0.043	0.015	0	0.01	0	0		25	0.0602	0.0697	0.0609	0.0509	0.041	0.047	0.0436	0.0208		0.0644	0.0681	0.0681	0.0531	0.0385	0.0469	0.0408	0.0225		0.0602	0.0671	0.0635	0.0508	0.0379	0.0471	0.04	0.0237			0.0288
25.2	0.06334	0.06691	0.06295	0.0543	0.04158	0.04593	0.04303	0.01546		12.35	0.052	0.067	0.045	0.016	0.001	0.011	0	0		25.2	0.0601	0.0695	0.0601	0.0511	0.0404	0.0466	0.043	0.0209		0.0649	0.0673	0.067	0.053	0.039	0.0469	0.041	0.0225		0.0614	0.067	0.0645	0.0506	0.0378	0.0468	0.0398	0.0237			0.0287
25.4	0.06584	0.06811	0.0639	0.0556	0.03848	0.04703	0.03958	0.01661		12.4	0.053	0.067	0.047	0.016	0.003	0.013	0	0		25.4	0.0596	0.0701	0.0594	0.0511	0.0401	0.0462	0.0422	0.022		0.0645	0.0663	0.0659	0.0532	0.0397	0.0471	0.0412	0.0226		0.0618	0.067	0.065	0.0513	0.0382	0.0473	0.0396	0.0237			0.0286
25.6	0.06379	0.06956	0.06485	0.0544	0.03748	0.04748	0.03928	0.01271		12.45	0.054	0.068	0.049	0.017	0.004	0.016	0	0		25.6	0.0596	0.07	0.0589	0.051	0.0404	0.046	0.0414	0.0202		0.0634	0.0655	0.0657	0.0534	0.0401	0.0471	0.0414	0.0233		0.0614	0.0671	0.0654	0.0525	0.039	0.0483	0.0398	0.0238			0.0284
25.8	0.06579	0.07061	0.06335	0.0578	0.03753	0.05143	0.04078	0.00901		12.5	0.054	0.068	0.051	0.018	0.005	0.02	0	0		25.8	0.0595	0.0687	0.0591	0.0508	0.0409	0.0462	0.0418	0.0197		0.0619	0.0656	0.0661	0.0533	0.04	0.0468	0.0416	0.0234		0.0605	0.0672	0.0659	0.0533	0.0396	0.0489	0.0404	0.0239			0.0283
26	0.06299	0.07181	0.05995	0.05645	0.03908	0.04698	0.03908	0.01261		12.55	0.055	0.068	0.052	0.019	0.006	0.023	0	0		26	0.0598	0.0678	0.0596	0.0505	0.0415	0.0462	0.0424	0.0209		0.0602	0.0657	0.066	0.0531	0.0398	0.0467	0.0415	0.0233		0.0595	0.0671	0.0657	0.0534	0.0395	0.0491	0.0409	0.024			0.0281
26.2	0.06134	0.06631	0.0583	0.0556	0.04018	0.05188	0.04173	0.02541		12.6	0.055	0.069	0.054	0.019	0.007	0.025	0	0		26.2	0.0591	0.0675	0.0598	0.0503	0.0418	0.0464	0.0426	0.0213		0.0588	0.066	0.0649	0.0528	0.0392	0.0468	0.0416	0.0232		0.0588	0.0665	0.0649	0.0531	0.0392	0.0492	0.0413	0.0243			0.028
26.4	0.06489	0.06786	0.0603	0.0546	0.03793	0.05023	0.04013	0.02116		12.65	0.056	0.069	0.056	0.02	0.007	0.026	0	0		26.4	0.0591	0.067	0.0594	0.0498	0.0417	0.0462	0.0428	0.0217		0.058	0.066	0.064	0.0522	0.0382	0.0474	0.0416	0.0229		0.0587	0.0654	0.064	0.0526	0.0389	0.049	0.0413	0.0243			0.0278
26.6	0.06294	0.06696	0.06205	0.0532	0.03788	0.04638	0.04148	0.01801		12.7	0.056	0.069	0.057	0.02	0.007	0.027	0.001	0		26.6	0.0591	0.0666	0.0587	0.049	0.0409	0.0455	0.0426	0.0211		0.0579	0.0652	0.0637	0.0514	0.0372	0.0477	0.0414	0.0231		0.0588	0.0642	0.063	0.0521	0.039	0.0486	0.0409	0.0242			0.0276
26.8	0.06299	0.06601	0.064	0.055	0.03958	0.04783	0.03673	0.01386		12.75	0.056	0.07	0.058	0.02	0.008	0.028	0.001	0		26.8	0.059	0.0664	0.0578	0.0479	0.0399	0.0445	0.0424	0.02		0.0573	0.0641	0.0629	0.0509	0.0366	0.0478	0.0409	0.023		0.0585	0.063	0.062	0.0518	0.0393	0.0481	0.0406	0.0242			0.0275
27	0.06019	0.06451	0.0634	0.05575	0.03518	0.05033	0.03768	0.01056		12.8	0.057	0.07	0.058	0.021	0.008	0.029	0.002	0		27	0.0594	0.0662	0.0574	0.0471	0.0388	0.0436	0.042	0.0206		0.0568	0.0634	0.0613	0.0509	0.0368	0.0475	0.0405	0.0229		0.0581	0.062	0.0613	0.0517	0.0393	0.0478	0.0406	0.0242			0.0273
27.2	0.06329	0.06651	0.06065	0.0565	0.03548	0.04803	0.03853	0.01131		12.85	0.057	0.07	0.059	0.021	0.008	0.029	0.002	0		27.2	0.0592	0.0656	0.0577	0.0475	0.0384	0.0436	0.0417	0.0208		0.0564	0.0631	0.0599	0.0509	0.0374	0.0468	0.0403	0.0228		0.0577	0.0615	0.0608	0.0515	0.0392	0.0477	0.0406	0.0241			0.0271
27.4	0.06294	0.07146	0.059	0.05265	0.04243	0.04448	0.04033	0.02361		12.9	0.058	0.071	0.06	0.022	0.008	0.03	0.002	0		27.4	0.059	0.0655	0.0581	0.0482	0.0385	0.0441	0.0414	0.0213		0.056	0.0629	0.0592	0.0505	0.0378	0.0461	0.0404	0.0227		0.0568	0.062	0.0605	0.0512	0.0389	0.0476	0.0407	0.0242			0.027
27.6	0.06299	0.06906	0.057	0.0579	0.04318	0.04998	0.04143	0.02091		12.95	0.058	0.071	0.06	0.023	0.008	0.031	0.003	0		27.6	0.0586	0.0654	0.0582	0.0489	0.0391	0.045	0.0409	0.0215		0.0555	0.0627	0.059	0.0494	0.0377	0.0454	0.0405	0.0225		0.0555	0.0622	0.0605	0.051	0.0387	0.0475	0.0406	0.0242			0.0268
27.8	0.06239	0.06886	0.0605	0.05525	0.03993	0.04673	0.04283	0.01656		13	0.058	0.071	0.061	0.024	0.009	0.031	0.003	0		27.8	0.0578	0.0646	0.0586	0.0496	0.0399	0.0456	0.0405	0.0199		0.0551	0.0624	0.0589	0.0484	0.0373	0.0452	0.0403	0.0226		0.0542	0.0613	0.0602	0.0508	0.0384	0.0475	0.0404	0.0241			0.0267
28	0.06404	0.06856	0.06275	0.0527	0.03428	0.04978	0.03853	0.01276		13.05	0.059	0.072	0.061	0.025	0.009	0.032	0.003	0		28	0.0571	0.064	0.0585	0.05	0.0404	0.0457	0.0406	0.0198		0.0547	0.0622	0.0584	0.0479	0.037	0.0453	0.0399	0.0224		0.053	0.0602	0.0594	0.0504	0.0381	0.0474	0.0402	0.0241			0.0266
28.2	0.06169	0.06641	0.06405	0.05005	0.03418	0.05063	0.03998	0.00746		13.1	0.059	0.072	0.061	0.025	0.01	0.032	0.003	0		28.2	0.0566	0.0637	0.0576	0.0499	0.0405	0.0452	0.0405	0.021		0.0547	0.0619	0.0576	0.0479	0.0369	0.0454	0.0397	0.022		0.0522	0.0592	0.0583	0.0497	0.0377	0.047	0.04	0.024			0.0264
28.4	0.06004	0.06286	0.06325	0.0526	0.03418	0.04833	0.03833	0.00946		13.15	0.059	0.073	0.062	0.026	0.011	0.033	0.004	0		28.4	0.0565	0.0639	0.0568	0.0495	0.0401	0.0445	0.0406	0.0207		0.0551	0.0617	0.0567	0.0482	0.037	0.0454	0.0396	0.0218		0.0515	0.0582	0.0572	0.0488	0.0371	0.0465	0.0398	0.0238			0.0263
28.6	0.05939	0.06936	0.0601	0.05085	0.03418	0.04778	0.03708	0.01516		13.2	0.059	0.073	0.062	0.028	0.012	0.033	0.004	0		28.6	0.0569	0.0637	0.0566	0.0489	0.0389	0.0435	0.0408	0.0209		0.055	0.0611	0.0561	0.0484	0.037	0.0452	0.0396	0.022		0.051	0.0576	0.0562	0.0479	0.0364	0.0457	0.0394	0.0236			0.0262
28.8	0.06219	0.06751	0.05775	0.0501	0.03938	0.04938	0.03743	0.01401		13.25	0.06	0.073	0.062	0.029	0.012	0.034	0.004	0		28.8	0.0574	0.0641	0.0567	0.048	0.0375	0.0428	0.0406	0.0202		0.0554	0.0607	0.0558	0.0483	0.037	0.0448	0.0395	0.0219		0.0505	0.0576	0.0553	0.0471	0.0359	0.0448	0.0388	0.0234			0.0261
29	0.06069	0.06206	0.05935	0.05175	0.03888	0.04838	0.03898	0.01561		13.3	0.06	0.073	0.063	0.031	0.014	0.035	0.004	0		29	0.0572	0.0645	0.057	0.0474	0.0367	0.0425	0.0401	0.0196		0.0554	0.0608	0.0559	0.0481	0.0368	0.0443	0.0393	0.022		0.0501	0.0576	0.0548	0.0464	0.0355	0.0442	0.0381	0.0231			0.0261
29.2	0.06314	0.06301	0.0613	0.05005	0.03508	0.04573	0.03853	0.01301		13.35	0.06	0.074	0.063	0.033	0.015	0.035	0.005	0		29.2	0.0574	0.0648	0.0578	0.0469	0.0365	0.0426	0.0396	0.0203		0.0547	0.0614	0.0563	0.0478	0.0365	0.0438	0.0391	0.022		0.0499	0.0572	0.0546	0.0457	0.0351	0.0439	0.0376	0.0227			0.026
29.4	0.06064	0.06686	0.0637	0.0537	0.03593	0.04753	0.03733	0.02181		13.4	0.061	0.074	0.063	0.035	0.016	0.036	0.005	0		29.4	0.057	0.0646	0.058	0.0469	0.0369	0.0432	0.0392	0.0207		0.0541	0.0616	0.0569	0.0475	0.036	0.0437	0.0391	0.0217		0.05	0.0569	0.0545	0.0453	0.0347	0.0438	0.0371	0.0224			0.0259
29.6	0.06234	0.06481	0.06135	0.0565	0.03823	0.04803	0.03838	0.02346		13.45	0.061	0.074	0.064	0.037	0.017	0.036	0.005	0		29.6	0.057	0.0646	0.0578	0.0471	0.0377	0.0438	0.0389	0.0213		0.0536	0.0611	0.057	0.0475	0.0355	0.044	0.039	0.0215		0.0503	0.0567	0.0542	0.0452	0.0343	0.0435	0.0368	0.0221			0.0259
29.8	0.06029	0.06621	0.0586	0.0554	0.03523	0.04328	0.03968	0.01241		13.5	0.061	0.075	0.065	0.04	0.018	0.037	0.006	0		29.8	0.0569	0.0643	0.0576	0.0474	0.0383	0.0443	0.0389	0.0207		0.0535	0.0603	0.0564	0.0478	0.0353	0.0445	0.0391	0.0215		0.0503	0.0566	0.0539	0.0453	0.0342	0.0433	0.0365	0.0219			0.0258
30	0.06069	0.07081	0.059	0.0541	0.03268	0.04773	0.03883	0.01116		13.55	0.061	0.075	0.065	0.041	0.018	0.038	0.007	0		30	0.0567	0.0644	0.0571	0.0472	0.0385	0.0438	0.0393	0.0195		0.0535	0.0598	0.0557	0.0478	0.0353	0.0448	0.0391	0.0215		0.0502	0.0565	0.0539	0.0451	0.0342	0.0429	0.0362	0.0218			0.0258
30.2	0.05919	0.06966	0.0587	0.0551	0.03278	0.04713	0.03603	0.00761		13.6	0.062	0.075	0.065	0.043	0.018	0.038	0.008	0		30.2	0.0566	0.0649	0.0569	0.0473	0.0386	0.0431	0.0398	0.0202		0.0535	0.0595	0.0555	0.0474	0.0351	0.0444	0.039	0.0216		0.05	0.0565	0.054	0.045	0.0341	0.0427	0.036	0.0217			0.0257
30.4	0.06124	0.06806	0.0604	0.0514	0.03163	0.04573	0.04023	0.00826		13.65	0.062	0.075	0.066	0.044	0.019	0.038	0.009	0.001		30.4	0.0566	0.0649	0.0571	0.0475	0.0385	0.0427	0.0399	0.0206		0.0538	0.06	0.0557	0.0468	0.035	0.0435	0.0387	0.0217		0.0498	0.0564	0.0541	0.0448	0.034	0.0424	0.0359	0.0216			0.0257
30.6	0.06099	0.07406	0.06385	0.0449	0.03563	0.04663	0.03308	0.02626		13.7	0.062	0.076	0.066	0.046	0.019	0.039	0.011	0.002		30.6	0.0569	0.0643	0.0578	0.0484	0.038	0.0428	0.04	0.0205		0.0541	0.0603	0.056	0.0463	0.035	0.0426	0.0382	0.0216		0.0495	0.0559	0.054	0.0446	0.0338	0.0421	0.0357	0.0214			0.0256
30.8	0.05879	0.07251	0.06285	0.0483	0.03313	0.04658	0.03628	0.02426		13.75	0.063	0.076	0.066	0.048	0.019	0.039	0.012	0.002		30.8	0.057	0.0638	0.0583	0.0483	0.0377	0.0433	0.0402	0.0204		0.0539	0.0606	0.0564	0.046	0.0351	0.0424	0.0377	0.0214		0.0493	0.0555	0.0538	0.0444	0.0335	0.042	0.0356	0.0213			0.0255
31	0.05894	0.06786	0.06245	0.0494	0.03633	0.04418	0.03548	0.01776		13.8	0.063	0.076	0.067	0.049	0.02	0.039	0.013	0.003		31	0.0572	0.0635	0.0587	0.048	0.0375	0.0431	0.0398	0.0196		0.0537	0.0609	0.0568	0.046	0.0351	0.0426	0.0376	0.0213		0.0491	0.0555	0.0535	0.0442	0.0332	0.042	0.0354	0.0211			0.0255
31.2	0.06084	0.06436	0.061	0.0533	0.03703	0.04543	0.04013	0.01721		13.85	0.064	0.076	0.067	0.05	0.02	0.04	0.014	0.003		31.2	0.0575	0.0633	0.0592	0.0473	0.0378	0.0428	0.0393	0.0195		0.054	0.0604	0.0574	0.0462	0.0349	0.043	0.0377	0.0212		0.049	0.0558	0.0532	0.044	0.033	0.0418	0.0353	0.021			0.0254
31.4	0.05644	0.05711	0.05775	0.05125	0.03813	0.04293	0.03643	0.01606		13.9	0.064	0.077	0.067	0.051	0.021	0.04	0.015	0.003		31.4	0.0576	0.0628	0.0592	0.0466	0.0378	0.0422	0.0387	0.0205		0.0538	0.0594	0.0577	0.0464	0.0348	0.0432	0.0379	0.021		0.0492	0.0557	0.0531	0.0438	0.0329	0.0416	0.0351	0.021			0.0253
31.6	0.06264	0.05946	0.0581	0.05115	0.03368	0.04613	0.03673	0.01496		13.95	0.064	0.077	0.068	0.052	0.021	0.04	0.015	0.004		31.6	0.0582	0.0624	0.0593	0.046	0.0381	0.0418	0.0385	0.0208		0.0536	0.0584	0.0573	0.0467	0.0347	0.0431	0.0378	0.021		0.0494	0.0552	0.0532	0.0436	0.0328	0.0414	0.0349	0.021			0.0252
31.8	0.06129	0.06341	0.0591	0.04875	0.03538	0.04543	0.03718	0.01491		14	0.064	0.077	0.068	0.052	0.022	0.041	0.016	0.004		31.8	0.0578	0.0627	0.0592	0.0459	0.0382	0.0417	0.0384	0.0209		0.0534	0.058	0.0568	0.0465	0.0348	0.0429	0.0377	0.0212		0.0494	0.055	0.0532	0.0436	0.0327	0.0414	0.0347	0.021			0.0251
32	0.05809	0.06101	0.06125	0.04785	0.03333	0.04638	0.03648	0.01416		14.05	0.065	0.077	0.068	0.052	0.023	0.042	0.017	0.005		32	0.0572	0.0625	0.0589	0.046	0.0381	0.0418	0.0386	0.0201		0.0532	0.058	0.0565	0.0462	0.0348	0.0424	0.0375	0.0213		0.049	0.0548	0.053	0.0437	0.0327	0.0414	0.0347	0.021			0.025
32.2	0.06084	0.06261	0.06205	0.04615	0.03778	0.04298	0.03503	0.00961		14.1	0.065	0.077	0.069	0.053	0.023	0.042	0.017	0.006		32.2	0.0571	0.0618	0.0585	0.0463	0.0377	0.042	0.0387	0.0195		0.0532	0.058	0.0563	0.0458	0.0347	0.0419	0.0373	0.0211		0.0485	0.0544	0.0529	0.0437	0.0327	0.0413	0.0347	0.0209			0.0248
32.4	0.05939	0.06466	0.05905	0.0488	0.03513	0.04193	0.03713	0.01246		14.15	0.066	0.078	0.069	0.053	0.023	0.042	0.018	0.008		32.4	0.0566	0.0606	0.0579	0.0468	0.0372	0.0425	0.0386	0.0201		0.0529	0.0576	0.0562	0.0454	0.0345	0.0415	0.0372	0.0211		0.048	0.0541	0.0527	0.0436	0.0326	0.0412	0.0346	0.0209			0.0247
32.6	0.05629	0.05971	0.05825	0.04965	0.03783	0.03873	0.03878	0.01946		14.2	0.066	0.078	0.069	0.053	0.024	0.042	0.019	0.009		32.6	0.0559	0.0599	0.0572	0.0472	0.0366	0.0427	0.0383	0.0208		0.0523	0.057	0.0561	0.0453	0.0343	0.0414	0.037	0.021		0.0475	0.0536	0.0524	0.0434	0.0325	0.0411	0.0346	0.0209			0.0246
32.8	0.05954	0.05881	0.0581	0.05185	0.03383	0.03753	0.03728	0.01731		14.25	0.066	0.078	0.07	0.053	0.024	0.043	0.02	0.01		32.8	0.0555	0.0598	0.0567	0.0467	0.0361	0.0426	0.0384	0.0214		0.0519	0.0563	0.0558	0.0453	0.0342	0.0416	0.0369	0.0211		0.047	0.0532	0.052	0.0431	0.0323	0.0409	0.0346	0.0209			0.0245
33	0.05949	0.06081	0.05775	0.0469	0.03518	0.04623	0.03553	0.01386		14.3	0.066	0.078	0.07	0.053	0.025	0.043	0.021	0.011		33	0.0545	0.0596	0.0567	0.0459	0.036	0.0422	0.038	0.0202		0.0515	0.0558	0.0552	0.0455	0.034	0.0417	0.0369	0.021		0.0465	0.0528	0.0515	0.0428	0.032	0.0407	0.0345	0.0209			0.0244
33.2	0.05784	0.06086	0.06155	0.0436	0.03723	0.04908	0.03418	0.01136		14.35	0.067	0.078	0.07	0.054	0.026	0.043	0.022	0.011		33.2	0.0544	0.0593	0.0565	0.0453	0.0362	0.0416	0.0378	0.0189		0.0509	0.0556	0.0544	0.0455	0.0338	0.0417	0.0368	0.0209		0.0461	0.0524	0.0511	0.0425	0.0318	0.0405	0.0343	0.0208			0.0243
33.4	0.05749	0.05826	0.0614	0.04975	0.03063	0.04433	0.03273	0.01271		14.4	0.067	0.078	0.07	0.054	0.026	0.043	0.023	0.012		33.4	0.0542	0.0592	0.0563	0.0451	0.0364	0.0409	0.0375	0.0196		0.0506	0.0555	0.0538	0.0453	0.0335	0.0415	0.0368	0.0209		0.0458	0.052	0.0507	0.0421	0.0316	0.0402	0.0341	0.0207			0.0242
33.6	0.05869	0.05941	0.0599	0.0507	0.03303	0.04558	0.03343	0.01451		14.45	0.067	0.079	0.071	0.054	0.026	0.043	0.023	0.012		33.6	0.0534	0.0593	0.0561	0.0452	0.0364	0.0407	0.037	0.0207		0.0502	0.0554	0.0537	0.0448	0.033	0.0411	0.0366	0.021		0.0455	0.0517	0.0503	0.0418	0.0313	0.04	0.0339	0.0207			0.0241
33.8	0.05789	0.06196	0.0562	0.05495	0.03573	0.04623	0.03643	0.01201		14.5	0.068	0.079	0.07	0.054	0.027	0.044	0.024	0.012		33.8	0.0535	0.0593	0.0559	0.0454	0.0361	0.041	0.0372	0.0205		0.05	0.0556	0.0537	0.0444	0.0326	0.0409	0.0363	0.0208		0.0452	0.0515	0.05	0.0415	0.0311	0.0398	0.0337	0.0206			0.024
34	0.05869	0.06201	0.05495	0.053	0.03348	0.05058	0.03898	0.01141		14.55	0.068	0.079	0.072	0.054	0.027	0.044	0.025	0.013		34	0.0535	0.0594	0.0555	0.0456	0.0355	0.041	0.0371	0.0203		0.0497	0.0556	0.0537	0.044	0.0324	0.0406	0.036	0.0208		0.0448	0.0514	0.0497	0.0412	0.0309	0.0396	0.0335	0.0205			0.024
34.2	0.05759	0.06296	0.05585	0.04575	0.03193	0.04323	0.03298	0.00926		14.6	0.068	0.079	0.071	0.055	0.027	0.044	0.026	0.013		34.2	0.0532	0.0594	0.0553	0.0454	0.035	0.0413	0.0369	0.0191		0.0495	0.0553	0.0535	0.0439	0.0323	0.0405	0.0356	0.0207		0.0445	0.0515	0.0495	0.0409	0.0306	0.0394	0.0332	0.0204			0.0239
34.4	0.05779	0.06546	0.05825	0.0451	0.03473	0.04303	0.03703	0.00816		14.65	0.068	0.079	0.071	0.056	0.027	0.044	0.027	0.013		34.4	0.0535	0.0593	0.0552	0.0449	0.0345	0.0411	0.0371	0.0183		0.0493	0.0551	0.0532	0.0439	0.0323	0.0405	0.0355	0.0206		0.0443	0.0515	0.0493	0.0406	0.0304	0.0392	0.033	0.0203			0.0238
34.6	0.05919	0.06406	0.0602	0.0392	0.02983	0.04383	0.03423	0.01901		14.7	0.069	0.079	0.071	0.056	0.027	0.044	0.028	0.014		34.6	0.0532	0.059	0.0552	0.0447	0.0343	0.0408	0.0369	0.0194		0.0491	0.0552	0.0529	0.0439	0.0321	0.0405	0.0355	0.0205		0.0441	0.0514	0.0491	0.0404	0.0302	0.0389	0.0328	0.0201			0.0238
34.8	0.05539	0.06166	0.06055	0.04535	0.02943	0.04098	0.03433	0.01596		14.75	0.069	0.079	0.072	0.056	0.028	0.044	0.029	0.014		34.8	0.0531	0.0587	0.0551	0.0446	0.0347	0.0403	0.0367	0.0201		0.049	0.0553	0.0527	0.0436	0.032	0.0404	0.0354	0.0204		0.044	0.0513	0.0489	0.0402	0.03	0.0388	0.0326	0.02			0.0237
35	0.05629	0.06231	0.0587	0.0472	0.04018	0.04173	0.03213	0.01416		14.8	0.069	0.08	0.072	0.057	0.028	0.044	0.03	0.014		35	0.0532	0.0586	0.0549	0.0447	0.0351	0.0399	0.0369	0.0202		0.0488	0.0551	0.0527	0.0433	0.0318	0.0402	0.0354	0.0204		0.0439	0.0512	0.0488	0.04	0.0298	0.0386	0.0324	0.0199			0.0237
35.2	0.05574	0.06156	0.056	0.0483	0.03688	0.04508	0.03708	0.01181		14.85	0.07	0.08	0.073	0.057	0.028	0.044	0.031	0.015		35.2	0.0531	0.0586	0.0544	0.0447	0.0354	0.0396	0.0368	0.0199		0.0488	0.0547	0.0527	0.0431	0.0317	0.0399	0.0352	0.0203		0.0438	0.051	0.0486	0.0399	0.0297	0.0385	0.0322	0.0197			0.0236
35.4	0.05394	0.06031	0.05325	0.05325	0.03668	0.04513	0.03883	0.00906		14.9	0.07	0.08	0.072	0.058	0.028	0.045	0.032	0.015		35.4	0.0528	0.0581	0.0543	0.0445	0.0355	0.0396	0.0367	0.0184		0.0488	0.0544	0.0525	0.043	0.0317	0.0397	0.035	0.0203		0.0438	0.0508	0.0484	0.0398	0.0297	0.0384	0.032	0.0196			0.0235
35.6	0.05269	0.06021	0.05245	0.0504	0.03338	0.04743	0.03358	0.00841		14.95	0.07	0.08	0.072	0.058	0.028	0.045	0.032	0.015		35.6	0.0531	0.0578	0.0541	0.0444	0.0353	0.0395	0.0365	0.0185		0.0488	0.0542	0.0522	0.0428	0.0317	0.0396	0.0348	0.0202		0.0438	0.0507	0.0483	0.0397	0.0296	0.0382	0.0319	0.0195			0.0234
35.8	0.05499	0.05776	0.0578	0.0475	0.03283	0.04673	0.03438	0.01136		15	0.07	0.08	0.073	0.058	0.029	0.045	0.033	0.015		35.8	0.0531	0.0575	0.0538	0.0444	0.0352	0.0396	0.0361	0.0195		0.0486	0.054	0.0519	0.0427	0.0317	0.0395	0.0346	0.0201		0.0439	0.0504	0.0482	0.0396	0.0295	0.0381	0.0318	0.0194			0.0234
36	0.05424	0.05836	0.06235	0.04125	0.03028	0.04493	0.03118	0.01271		15.05	0.071	0.081	0.074	0.058	0.029	0.045	0.034	0.016		36	0.053	0.0572	0.0541	0.0442	0.035	0.0396	0.0362	0.0196		0.0486	0.0538	0.0518	0.0426	0.0317	0.0394	0.0346	0.0199		0.0438	0.0502	0.0481	0.0395	0.0294	0.038	0.0317	0.0194			0.0233
36.2	0.05639	0.05996	0.0619	0.04245	0.02933	0.04213	0.03298	0.01201		15.1	0.071	0.081	0.073	0.058	0.029	0.045	0.035	0.016		36.2	0.053	0.0568	0.0542	0.044	0.035	0.0395	0.0363	0.0199		0.0486	0.0535	0.0518	0.0425	0.0316	0.0393	0.0346	0.0198		0.0438	0.0499	0.048	0.0394	0.0294	0.0379	0.0316	0.0193			0.0232
36.4	0.05639	0.05716	0.05645	0.04335	0.03388	0.04038	0.03208	0.01096		15.15	0.071	0.081	0.074	0.059	0.029	0.046	0.035	0.016		36.4	0.0529	0.0562	0.0541	0.0439	0.0348	0.0393	0.0361	0.0195		0.0486	0.0532	0.0518	0.0425	0.0315	0.0392	0.0346	0.0199		0.0437	0.0495	0.0479	0.0394	0.0293	0.0378	0.0315	0.0192			0.0231
36.6	0.05454	0.05821	0.0542	0.0417	0.03768	0.03943	0.03483	0.00936		15.2	0.071	0.082	0.074	0.059	0.029	0.046	0.036	0.016		36.6	0.0524	0.0562	0.0541	0.0437	0.0346	0.0391	0.0361	0.0185		0.0484	0.0527	0.0516	0.0425	0.0314	0.0392	0.0346	0.0199		0.0436	0.0492	0.0478	0.0393	0.0293	0.0377	0.0315	0.0192			0.0231
36.8	0.05514	0.06226	0.05205	0.0453	0.04013	0.03923	0.02898	0.01001		15.25	0.072	0.082	0.074	0.059	0.03	0.046	0.036	0.017		36.8	0.052	0.0563	0.0536	0.0438	0.0342	0.039	0.036	0.019		0.0482	0.0524	0.0513	0.0425	0.0315	0.0391	0.0345	0.02		0.0434	0.0489	0.0476	0.0392	0.0292	0.0376	0.0314	0.0191			0.023
37	0.05299	0.06066	0.05385	0.04555	0.03893	0.04408	0.03513	0.01616		15.3	0.072	0.082	0.074	0.06	0.03	0.047	0.037	0.017		37	0.0517	0.0565	0.0535	0.044	0.0339	0.0389	0.0359	0.0196		0.0479	0.0523	0.051	0.0424	0.0314	0.0389	0.0343	0.0199		0.0432	0.0487	0.0474	0.039	0.0291	0.0374	0.0313	0.0191			0.0229
37.2	0.05514	0.05941	0.0544	0.04455	0.02963	0.04338	0.03658	0.01411		15.35	0.072	0.081	0.074	0.06	0.03	0.047	0.038	0.017		37.2	0.0513	0.0566	0.0535	0.0441	0.0336	0.039	0.036	0.0199		0.0475	0.0521	0.0509	0.0423	0.0313	0.0386	0.0343	0.0198		0.043	0.0486	0.0473	0.0389	0.029	0.0373	0.0313	0.0191			0.0228
37.4	0.05389	0.05621	0.0565	0.05015	0.03318	0.04563	0.03578	0.01136		15.4	0.072	0.082	0.075	0.06	0.03	0.047	0.038	0.017		37.4	0.0513	0.0563	0.0533	0.0442	0.0333	0.0391	0.0358	0.0202		0.0471	0.0522	0.0509	0.0419	0.031	0.0383	0.0342	0.0197		0.0427	0.0485	0.0472	0.0387	0.0289	0.0371	0.0312	0.0191			0.0228
37.6	0.05264	0.05581	0.0569	0.0482	0.03053	0.04438	0.03398	0.00881		15.45	0.072	0.082	0.075	0.06	0.03	0.047	0.038	0.018		37.6	0.0507	0.0558	0.0533	0.0443	0.0331	0.0393	0.0352	0.0191		0.0467	0.0525	0.0511	0.0416	0.0306	0.0382	0.0341	0.0197		0.0425	0.0484	0.0472	0.0386	0.0288	0.037	0.0311	0.0191			0.0227
37.8	0.05324	0.05841	0.0552	0.04585	0.03163	0.03973	0.03353	0.01061		15.5	0.072	0.082	0.075	0.061	0.03	0.047	0.039	0.018		37.8	0.0504	0.0554	0.053	0.0443	0.033	0.0393	0.0347	0.0178		0.0465	0.0524	0.0511	0.0414	0.0303	0.0382	0.0339	0.0197		0.0422	0.0483	0.047	0.0384	0.0286	0.0369	0.031	0.0191			0.0226
38	0.05459	0.06056	0.0551	0.03885	0.03138	0.03943	0.03273	0.01031		15.55	0.073	0.082	0.075	0.061	0.031	0.048	0.039	0.018		38	0.05	0.0552	0.0527	0.0444	0.0329	0.0392	0.0343	0.0186		0.0465	0.052	0.0509	0.0413	0.0301	0.0383	0.0338	0.0197		0.042	0.0481	0.0469	0.0383	0.0285	0.0369	0.0309	0.019			0.0226
38.2	0.05464	0.05766	0.0474	0.04325	0.03253	0.03873	0.03083	0.01721		15.6	0.073	0.082	0.075	0.061	0.031	0.048	0.04	0.018		38.2	0.0501	0.0549	0.0526	0.0438	0.0328	0.0387	0.0341	0.0193		0.0463	0.0515	0.0505	0.0414	0.0299	0.0383	0.0336	0.0196		0.0417	0.048	0.0467	0.0381	0.0283	0.0368	0.0308	0.019			0.0225
38.4	0.05509	0.05761	0.04795	0.04425	0.03283	0.04013	0.02953	0.01671		15.65	0.073	0.083	0.075	0.061	0.031	0.049	0.04	0.018		38.4	0.0497	0.0548	0.0527	0.0433	0.0327	0.0383	0.0341	0.0194		0.046	0.0514	0.05	0.0413	0.0299	0.0382	0.0335	0.0196		0.0415	0.0478	0.0466	0.0379	0.0281	0.0367	0.0307	0.0189			0.0224
38.6	0.05259	0.05896	0.05305	0.03845	0.03343	0.04008	0.03128	0.01406		15.7	0.074	0.083	0.076	0.061	0.031	0.049	0.041	0.019		38.6	0.0493	0.0548	0.0521	0.0427	0.0325	0.0379	0.0342	0.0194		0.0457	0.0515	0.0498	0.041	0.0298	0.038	0.0334	0.0194		0.0413	0.0477	0.0464	0.0377	0.028	0.0365	0.0306	0.0189			0.0224
38.8	0.05104	0.05536	0.05635	0.04335	0.02248	0.04188	0.03273	0.01081		15.75	0.074	0.082	0.076	0.062	0.031	0.049	0.041	0.019		38.8	0.0491	0.0549	0.052	0.0422	0.0322	0.0378	0.034	0.0183		0.0454	0.0515	0.0499	0.0406	0.0296	0.0376	0.0332	0.0194		0.0412	0.0475	0.0462	0.0375	0.0278	0.0364	0.0305	0.0188			0.0223
39	0.05384	0.05586	0.05965	0.0471	0.02468	0.03828	0.03483	0.01076		15.8	0.074	0.083	0.076	0.062	0.031	0.049	0.042	0.019		39	0.049	0.0545	0.052	0.0418	0.0321	0.038	0.0336	0.0177		0.0453	0.0513	0.05	0.0403	0.0294	0.0374	0.0331	0.0194		0.041	0.0472	0.046	0.0373	0.0277	0.0362	0.0303	0.0187			0.0222
39.2	0.05314	0.05601	0.0566	0.055	0.02548	0.03953	0.03338	0.01131		15.85	0.074	0.083	0.076	0.062	0.032	0.049	0.042	0.019		39.2	0.0492	0.0543	0.052	0.0419	0.0322	0.0381	0.0335	0.0182		0.0453	0.0508	0.0498	0.0401	0.0293	0.0372	0.0329	0.0194		0.0409	0.047	0.0458	0.0372	0.0276	0.0361	0.0302	0.0187			0.0221
39.4	0.05264	0.05376	0.05305	0.04695	0.02458	0.04083	0.02838	0.01211		15.9	0.074	0.083	0.076	0.063	0.032	0.049	0.042	0.019		39.4	0.0491	0.0539	0.0515	0.0421	0.0323	0.0382	0.0338	0.019		0.0452	0.0504	0.0495	0.04	0.0293	0.0372	0.0327	0.0194		0.0407	0.0467	0.0456	0.037	0.0275	0.0359	0.03	0.0186			0.022
39.6	0.04919	0.05741	0.0511	0.0414	0.02783	0.04243	0.02928	0.01211		15.95	0.074	0.083	0.077	0.063	0.032	0.05	0.043	0.019		39.6	0.0492	0.0536	0.0513	0.0421	0.0324	0.0382	0.034	0.0191		0.0451	0.0501	0.0489	0.04	0.0293	0.0373	0.0327	0.0191		0.0406	0.0464	0.0454	0.0369	0.0274	0.0358	0.0299	0.0185			0.022
39.8	0.05139	0.05711	0.04925	0.0439	0.02928	0.03863	0.03238	0.00931		16	0.074	0.083	0.077	0.064	0.032	0.05	0.043	0.019		39.8	0.0491	0.0534	0.051	0.0419	0.0325	0.038	0.0341	0.0191		0.0451	0.0498	0.0487	0.0399	0.0293	0.0372	0.0327	0.0189		0.0405	0.0461	0.0453	0.0367	0.0273	0.0357	0.0298	0.0184			0.0219
40	0.05084	0.05451	0.05135	0.0416	0.03228	0.04173	0.03143	0.00981		16.05	0.074	0.083	0.077	0.064	0.032	0.05	0.043	0.019		40	0.0489	0.0533	0.0509	0.0416	0.0326	0.0375	0.0341	0.0184		0.0451	0.0497	0.0486	0.0398	0.0293	0.037	0.0326	0.0189		0.0405	0.0458	0.0451	0.0366	0.0272	0.0356	0.0297	0.0183			0.0218
40.2	0.04924	0.05616	0.05395	0.0419	0.03098	0.03753	0.03103	0.01376		16.1	0.075	0.084	0.077	0.064	0.033	0.05	0.044	0.019		40.2	0.0486	0.0533	0.0509	0.0413	0.0326	0.037	0.0341	0.0177		0.0449	0.0496	0.0486	0.0396	0.0292	0.0367	0.0325	0.0189		0.0403	0.0456	0.045	0.0365	0.0271	0.0354	0.0296	0.0183			0.0217
40.4	0.05214	0.05481	0.05675	0.044	0.03183	0.03878	0.03193	0.01396		16.15	0.075	0.084	0.077	0.064	0.033	0.05	0.044	0.02		40.4	0.0484	0.0533	0.0509	0.0413	0.0323	0.0366	0.0344	0.0183		0.0448	0.0495	0.0487	0.0394	0.0291	0.0364	0.0324	0.019		0.0402	0.0454	0.0448	0.0364	0.027	0.0353	0.0295	0.0182			0.0216
40.6	0.04819	0.05431	0.0562	0.04355	0.03003	0.03918	0.03228	0.01481		16.2	0.075	0.084	0.078	0.065	0.033	0.051	0.044	0.02		40.6	0.0482	0.0527	0.0509	0.0415	0.032	0.0367	0.0346	0.0186		0.0447	0.0492	0.0487	0.0393	0.029	0.0363	0.0322	0.0191		0.0401	0.0452	0.0447	0.0363	0.0269	0.0352	0.0293	0.0182			0.0215
40.8	0.04769	0.05531	0.0521	0.04265	0.02873	0.03783	0.02978	0.01001		16.25	0.075	0.084	0.078	0.065	0.033	0.051	0.044	0.02		40.8	0.0479	0.052	0.0508	0.0415	0.0317	0.0368	0.0345	0.0188		0.0445	0.0487	0.0486	0.0393	0.0289	0.0363	0.032	0.0189		0.0398	0.045	0.0446	0.0362	0.0268	0.0351	0.0293	0.0181			0.0214
41	0.04974	0.05426	0.05115	0.0411	0.02733	0.03723	0.02953	0.00726		16.3	0.075	0.084	0.078	0.065	0.034	0.051	0.045	0.02		41	0.0478	0.0518	0.0506	0.0414	0.0315	0.0368	0.0341	0.019		0.0441	0.0484	0.0482	0.0392	0.0288	0.0363	0.0319	0.0187		0.0396	0.0447	0.0444	0.036	0.0267	0.035	0.0292	0.0181			0.0212
41.2	0.04819	0.05396	0.049	0.0409	0.03198	0.03843	0.03073	0.00751		16.35	0.075	0.084	0.078	0.066	0.034	0.051	0.045	0.02		41.2	0.0472	0.0516	0.0502	0.0411	0.0313	0.0366	0.0334	0.0182		0.0438	0.0483	0.0478	0.0392	0.0287	0.0362	0.0319	0.0186		0.0393	0.0444	0.0442	0.0359	0.0266	0.0348	0.0291	0.018			0.0211
41.4	0.05029	0.05276	0.04935	0.0388	0.02698	0.03703	0.03208	0.01116		16.4	0.075	0.084	0.079	0.066	0.034	0.052	0.045	0.02		41.4	0.047	0.051	0.05	0.041	0.0312	0.0365	0.0329	0.0176		0.0435	0.0482	0.0477	0.039	0.0285	0.036	0.0319	0.0186		0.039	0.0441	0.044	0.0357	0.0265	0.0347	0.029	0.018			0.021
41.6	0.04959	0.05296	0.05065	0.0386	0.02923	0.03738	0.02848	0.01136		16.45	0.075	0.084	0.079	0.066	0.034	0.052	0.046	0.02		41.6	0.0469	0.0505	0.0498	0.0407	0.031	0.0361	0.0326	0.018		0.0433	0.048	0.0477	0.0387	0.0282	0.0359	0.0318	0.0187		0.0387	0.0438	0.0438	0.0355	0.0263	0.0346	0.0289	0.0179			0.0209
41.8	0.04749	0.05171	0.05215	0.03705	0.02728	0.03913	0.02818	0.00976		16.5	0.075	0.084	0.078	0.066	0.034	0.052	0.046	0.02		41.8	0.0465	0.0505	0.0498	0.0403	0.0308	0.036	0.0323	0.0187		0.0431	0.0476	0.0476	0.0385	0.0279	0.0357	0.0317	0.0188		0.0385	0.0434	0.0436	0.0353	0.0262	0.0344	0.0288	0.0179			0.0207
42	0.04894	0.05311	0.05355	0.041	0.02618	0.03608	0.02908	0.00941		16.55	0.076	0.084	0.079	0.067	0.034	0.053	0.046	0.02		42	0.046	0.0503	0.0496	0.0399	0.0307	0.0359	0.0323	0.0188		0.0429	0.047	0.0474	0.0383	0.0277	0.0356	0.0315	0.0187		0.0382	0.043	0.0433	0.0351	0.026	0.0342	0.0287	0.0178			0.0206
42.2	0.04619	0.05396	0.05175	0.04185	0.03158	0.03663	0.03038	0.00876		16.6	0.076	0.084	0.079	0.067	0.034	0.053	0.046	0.02		42.2	0.0457	0.0496	0.0492	0.0398	0.0304	0.0358	0.0321	0.0189		0.0427	0.0464	0.047	0.0382	0.0276	0.0355	0.0312	0.0186		0.0379	0.0426	0.043	0.0348	0.0259	0.034	0.0285	0.0178			0.0205
42.4	0.04959	0.05606	0.0507	0.04045	0.02878	0.03888	0.03053	0.00996		16.65	0.076	0.084	0.079	0.067	0.035	0.053	0.047	0.02		42.4	0.0456	0.049	0.0489	0.0397	0.0302	0.0358	0.0316	0.0179		0.0423	0.0459	0.0466	0.0381	0.0275	0.0354	0.0311	0.0185		0.0376	0.0422	0.0427	0.0346	0.0257	0.0338	0.0284	0.0177			0.0203
42.6	0.04819	0.05531	0.05005	0.0381	0.02698	0.03883	0.03068	0.00851		16.7	0.076	0.084	0.079	0.067	0.035	0.053	0.047	0.021		42.6	0.0451	0.0487	0.0484	0.0398	0.0298	0.0357	0.0313	0.0169		0.0418	0.0457	0.0462	0.0378	0.0274	0.0351	0.0309	0.0184		0.0372	0.0418	0.0424	0.0343	0.0255	0.0337	0.0283	0.0177			0.0202
42.8	0.04599	0.05246	0.0485	0.03855	0.02783	0.03848	0.03108	0.00956		16.75	0.076	0.084	0.079	0.067	0.035	0.053	0.047	0.021		42.8	0.0448	0.0483	0.048	0.0395	0.0294	0.0353	0.0314	0.0172		0.0413	0.0454	0.0459	0.0375	0.0272	0.0349	0.0308	0.0184		0.0369	0.0414	0.0421	0.0341	0.0254	0.0335	0.0281	0.0176			0.0201
43	0.04864	0.05051	0.0484	0.0369	0.02498	0.03823	0.02843	0.00856		16.8	0.076	0.084	0.079	0.067	0.035	0.054	0.047	0.021		43	0.0444	0.0481	0.0479	0.039	0.0291	0.0352	0.0313	0.0179		0.041	0.0451	0.0458	0.0372	0.0269	0.0347	0.0308	0.0184		0.0366	0.0411	0.0417	0.0338	0.0252	0.0333	0.028	0.0175			0.0199
43.2	0.04649	0.05156	0.05035	0.03665	0.02758	0.03773	0.02968	0.00916		16.85	0.075	0.084	0.079	0.068	0.035	0.054	0.047	0.021		43.2	0.0439	0.0478	0.0478	0.0386	0.0288	0.0352	0.0314	0.0185		0.0407	0.0449	0.0455	0.0369	0.0267	0.0345	0.0306	0.0184		0.0363	0.0408	0.0414	0.0336	0.025	0.0331	0.0278	0.0175			0.0198
43.4	0.04749	0.05216	0.05365	0.036	0.02453	0.03543	0.02988	0.01016		16.9	0.076	0.084	0.08	0.068	0.035	0.054	0.048	0.021		43.4	0.0436	0.0475	0.0478	0.0383	0.0288	0.0349	0.0313	0.0183		0.0405	0.0446	0.0451	0.0367	0.0265	0.0344	0.0304	0.0184		0.036	0.0406	0.0412	0.0333	0.0248	0.0329	0.0276	0.0174			0.0197
43.6	0.04729	0.05231	0.0527	0.03435	0.02638	0.03433	0.02868	0.01291		16.95	0.075	0.084	0.079	0.068	0.036	0.054	0.048	0.021		43.6	0.0435	0.0471	0.0475	0.0381	0.0289	0.0344	0.0308	0.0176		0.0404	0.0442	0.0447	0.0365	0.0264	0.0343	0.0302	0.0182		0.0358	0.0405	0.0409	0.0331	0.0247	0.0326	0.0275	0.0173			0.0196
43.8	0.04729	0.05266	0.0528	0.03725	0.02298	0.03433	0.02828	0.01031		17	0.075	0.084	0.08	0.068	0.036	0.054	0.048	0.021		43.8	0.043	0.0469	0.0471	0.0379	0.029	0.034	0.0305	0.0169		0.0402	0.0438	0.0445	0.0364	0.0263	0.0341	0.03	0.018		0.0356	0.0403	0.0407	0.0328	0.0245	0.0324	0.0273	0.0172			0.0195
44	0.04649	0.05086	0.0493	0.03915	0.02158	0.03593	0.02783	0.00956		17.05	0.075	0.084	0.079	0.069	0.036	0.054	0.049	0.021		44	0.0428	0.0467	0.0467	0.0378	0.0289	0.0338	0.0305	0.0171		0.0399	0.0438	0.0443	0.0361	0.0261	0.0338	0.0298	0.018		0.0355	0.0402	0.0406	0.0326	0.0243	0.0323	0.0271	0.0172			0.0194
44.2	0.04674	0.05146	0.04805	0.03755	0.02343	0.03593	0.02998	0.00706		17.1	0.075	0.084	0.079	0.068	0.036	0.055	0.049	0.021		44.2	0.0427	0.0468	0.0464	0.0379	0.0287	0.0337	0.0305	0.0177		0.0396	0.0439	0.0442	0.0359	0.0259	0.0336	0.0297	0.0179		0.0353	0.04	0.0404	0.0324	0.0241	0.0321	0.027	0.0171			0.0193
44.4	0.04719	0.05261	0.04565	0.03615	0.02563	0.03548	0.03133	0.00961		17.15	0.075	0.083	0.079	0.068	0.036	0.055	0.049	0.021		44.4	0.0425	0.0467	0.0462	0.0377	0.0283	0.0336	0.0304	0.0178		0.0395	0.0439	0.0442	0.0356	0.0257	0.0334	0.0296	0.0179		0.0352	0.0399	0.0403	0.0322	0.024	0.032	0.0268	0.017			0.0192
44.6	0.04729	0.05216	0.04615	0.0371	0.02828	0.03678	0.02868	0.00986		17.2	0.075	0.084	0.08	0.068	0.036	0.055	0.049	0.021		44.6	0.0425	0.0465	0.0464	0.0375	0.028	0.0335	0.0302	0.0177		0.0393	0.0436	0.0443	0.0354	0.0254	0.0333	0.0294	0.0179		0.035	0.0398	0.0402	0.032	0.0238	0.0318	0.0267	0.0169			0.0192
44.8	0.04609	0.04986	0.04985	0.0359	0.02888	0.03453	0.02768	0.01051		17.25	0.075	0.083	0.08	0.068	0.037	0.055	0.049	0.021		44.8	0.0424	0.0462	0.0463	0.0373	0.0276	0.0334	0.0299	0.0174		0.0392	0.0435	0.0442	0.0352	0.0252	0.0332	0.0292	0.0178		0.0349	0.0397	0.04	0.0319	0.0237	0.0317	0.0265	0.0168			0.0191
45	0.04699	0.04971	0.05325	0.0371	0.02798	0.03543	0.02808	0.01136		17.3	0.075	0.083	0.079	0.068	0.037	0.055	0.049	0.021		45	0.0422	0.0458	0.0462	0.0372	0.0274	0.0332	0.0295	0.0167		0.0391	0.0433	0.0438	0.0352	0.0251	0.0332	0.0291	0.0177		0.0347	0.0396	0.0399	0.0317	0.0235	0.0315	0.0264	0.0167			0.019
45.2	0.04599	0.05076	0.0523	0.0377	0.02728	0.03353	0.02513	0.00841		17.35	0.074	0.083	0.079	0.069	0.037	0.055	0.049	0.021		45.2	0.0419	0.0459	0.0461	0.0371	0.0272	0.0333	0.0294	0.0166		0.039	0.0431	0.0435	0.0351	0.0249	0.0332	0.0289	0.0175		0.0346	0.0395	0.0398	0.0315	0.0234	0.0314	0.0262	0.0166			0.019
45.4	0.04659	0.05291	0.0505	0.0341	0.02363	0.03453	0.02718	0.00736		17.4	0.074	0.083	0.079	0.069	0.037	0.055	0.05	0.021		45.4	0.0417	0.0459	0.046	0.0371	0.0271	0.0333	0.0293	0.017		0.0389	0.0429	0.0433	0.0349	0.0248	0.033	0.0288	0.0174		0.0345	0.0393	0.0396	0.0314	0.0232	0.0312	0.0261	0.0165			0.0189
45.6	0.04589	0.05141	0.0507	0.03605	0.02418	0.03353	0.02683	0.00771		17.45	0.074	0.083	0.079	0.069	0.037	0.055	0.05	0.021		45.6	0.0417	0.0459	0.0459	0.0369	0.027	0.0332	0.0293	0.0175		0.0388	0.0428	0.0433	0.0348	0.0247	0.0328	0.0287	0.0174		0.0344	0.0392	0.0395	0.0312	0.0231	0.0311	0.0259	0.0165			0.0189
45.8	0.04404	0.05271	0.0466	0.0353	0.02283	0.03348	0.02963	0.00861		17.5	0.074	0.083	0.079	0.069	0.037	0.056	0.05	0.021		45.8	0.0417	0.0455	0.0458	0.0367	0.027	0.033	0.0292	0.0176		0.0387	0.0427	0.0432	0.0346	0.0246	0.0325	0.0287	0.0175		0.0343	0.0391	0.0394	0.0311	0.023	0.031	0.0258	0.0164			0.0189
46	0.04539	0.05376	0.04435	0.03335	0.02278	0.03633	0.02643	0.01136		17.55	0.074	0.083	0.079	0.069	0.037	0.056	0.05	0.021		46	0.0417	0.0454	0.0457	0.0365	0.0269	0.0327	0.0289	0.0176		0.0386	0.0426	0.0432	0.0344	0.0246	0.0323	0.0285	0.0175		0.0343	0.039	0.0393	0.031	0.0229	0.0309	0.0256	0.0163			0.0188
46.2	0.04674	0.05201	0.04465	0.0328	0.02378	0.03248	0.02758	0.00981		17.6	0.074	0.082	0.079	0.069	0.037	0.056	0.05	0.022		46.2	0.0417	0.0454	0.0455	0.0363	0.0269	0.0326	0.0287	0.0167		0.0386	0.0426	0.0432	0.0343	0.0245	0.0322	0.0284	0.0175		0.0342	0.0389	0.0392	0.0309	0.0228	0.0308	0.0255	0.0163			0.0188
46.4	0.04624	0.05291	0.04875	0.0358	0.02723	0.03363	0.03103	0.00736		17.65	0.074	0.083	0.078	0.069	0.037	0.056	0.05	0.021		46.4	0.0417	0.0455	0.0454	0.0362	0.0269	0.0325	0.0286	0.0162		0.0387	0.0425	0.0431	0.0342	0.0244	0.0322	0.0283	0.0174		0.0342	0.039	0.0391	0.0308	0.0227	0.0307	0.0254	0.0162			0.0187
46.6	0.04724	0.05141	0.0517	0.0466	0.02863	0.03508	0.02793	0.01066		17.7	0.074	0.083	0.079	0.069	0.038	0.056	0.05	0.022		46.6	0.0419	0.0458	0.0453	0.0363	0.0268	0.0324	0.0286	0.0164		0.0387	0.0426	0.043	0.0341	0.0244	0.0321	0.0281	0.0173		0.0342	0.039	0.0391	0.0308	0.0227	0.0306	0.0253	0.0162			0.0187
46.8	0.04604	0.05051	0.0501	0.04465	0.02538	0.03683	0.02843	0.01001		17.75	0.074	0.082	0.078	0.069	0.037	0.056	0.05	0.022		46.8	0.0419	0.046	0.0456	0.0364	0.0267	0.0324	0.0286	0.017		0.0387	0.0428	0.043	0.0341	0.0243	0.032	0.028	0.0172		0.0343	0.0391	0.0391	0.0307	0.0226	0.0305	0.0253	0.0161			0.0187
47	0.04504	0.05151	0.04935	0.0386	0.02493	0.03528	0.02653	0.00871		17.8	0.074	0.082	0.079	0.068	0.038	0.056	0.051	0.022		47	0.0421	0.0459	0.0458	0.0363	0.0265	0.0323	0.0287	0.0173		0.0388	0.0428	0.043	0.0341	0.0242	0.032	0.028	0.0171		0.0344	0.039	0.0391	0.0306	0.0225	0.0304	0.0252	0.0161			0.0186
47.2	0.04474	0.05021	0.0471	0.03695	0.02658	0.03478	0.02498	0.00856		17.85	0.074	0.083	0.078	0.068	0.038	0.056	0.051	0.021		47.2	0.0421	0.0456	0.046	0.0362	0.0263	0.0321	0.0286	0.0172		0.0389	0.0426	0.0432	0.034	0.0241	0.032	0.028	0.0172		0.0345	0.0388	0.0392	0.0306	0.0225	0.0304	0.0251	0.0161			0.0186
47.4	0.04339	0.05036	0.0447	0.03415	0.02898	0.03458	0.02648	0.00771		17.9	0.074	0.082	0.079	0.068	0.038	0.056	0.051	0.022		47.4	0.0419	0.045	0.046	0.0361	0.0262	0.032	0.0284	0.0167		0.0389	0.0422	0.0433	0.0341	0.024	0.032	0.0279	0.0172		0.0344	0.0385	0.0392	0.0306	0.0225	0.0304	0.0251	0.0161			0.0185
47.6	0.04449	0.04966	0.04425	0.03365	0.03108	0.03538	0.02823	0.00836		17.95	0.074	0.082	0.078	0.068	0.038	0.056	0.051	0.022		47.6	0.0417	0.0444	0.0457	0.036	0.0262	0.032	0.0282	0.0161		0.0387	0.0418	0.0433	0.0341	0.024	0.0321	0.0279	0.0172		0.0342	0.0382	0.0391	0.0306	0.0225	0.0304	0.0251	0.0161			0.0185
47.8	0.04344	0.05141	0.04425	0.03575	0.03043	0.03278	0.02813	0.00731		18	0.074	0.082	0.078	0.068	0.038	0.057	0.051	0.022		47.8	0.0413	0.0436	0.0454	0.036	0.0261	0.032	0.0282	0.0163		0.0384	0.0414	0.043	0.0342	0.0239	0.0321	0.0278	0.0172		0.034	0.0378	0.0389	0.0306	0.0225	0.0304	0.025	0.016			0.0185
48	0.04314	0.05241	0.04545	0.038	0.02963	0.03303	0.02708	0.00756		18.05	0.074	0.082	0.078	0.068	0.038	0.056	0.051	0.022		48	0.0407	0.0433	0.0451	0.036	0.0261	0.0319	0.0283	0.0169		0.038	0.041	0.0426	0.0341	0.0239	0.032	0.0278	0.0172		0.0337	0.0376	0.0387	0.0306	0.0225	0.0303	0.025	0.016			0.0184
48.2	0.04269	0.04981	0.0487	0.0374	0.02923	0.03248	0.02798	0.00896		18.1	0.074	0.082	0.078	0.068	0.038	0.056	0.05	0.022		48.2	0.0402	0.0433	0.0446	0.0358	0.0261	0.0318	0.0282	0.0172		0.0377	0.0408	0.0423	0.034	0.0239	0.0317	0.0277	0.0171		0.0334	0.0374	0.0385	0.0305	0.0224	0.0302	0.025	0.016			0.0184
48.4	0.04459	0.05231	0.04615	0.0396	0.02468	0.03468	0.02628	0.00896		18.15	0.073	0.082	0.078	0.068	0.038	0.056	0.051	0.022		48.4	0.04	0.0436	0.0445	0.0356	0.026	0.0316	0.0282	0.0173		0.0373	0.0408	0.042	0.0337	0.0238	0.0314	0.0276	0.0171		0.0331	0.0373	0.0382	0.0303	0.0223	0.0301	0.025	0.016			0.0184
48.6	0.04489	0.05211	0.04795	0.0353	0.02278	0.03363	0.02608	0.01151		18.2	0.073	0.082	0.078	0.068	0.038	0.057	0.051	0.022		48.6	0.04	0.0438	0.0443	0.0353	0.0259	0.0312	0.0278	0.017		0.0372	0.041	0.0418	0.0333	0.0237	0.0311	0.0276	0.0171		0.033	0.0373	0.038	0.0301	0.0222	0.0299	0.0249	0.016			0.0183
48.8	0.04354	0.04961	0.0485	0.03385	0.02673	0.03263	0.02638	0.00766		18.25	0.073	0.081	0.077	0.068	0.038	0.056	0.051	0.022		48.8	0.0401	0.0438	0.0444	0.035	0.0258	0.031	0.0274	0.0164		0.0372	0.0411	0.0418	0.033	0.0235	0.0309	0.0275	0.0171		0.0329	0.0374	0.0379	0.0299	0.0221	0.0297	0.0248	0.016			0.0183
49	0.04274	0.05016	0.04595	0.03295	0.02728	0.03193	0.02558	0.00691		18.3	0.073	0.081	0.078	0.069	0.038	0.057	0.051	0.022		49	0.0403	0.0439	0.0444	0.035	0.0256	0.0308	0.0272	0.0159		0.0373	0.0411	0.0419	0.0328	0.0233	0.0309	0.0273	0.0171		0.0329	0.0373	0.0379	0.0297	0.022	0.0296	0.0247	0.0159			0.0183
49.2	0.04394	0.05191	0.0443	0.03685	0.03073	0.03128	0.02598	0.00726		18.35	0.073	0.081	0.078	0.067	0.038	0.056	0.051	0.022		49.2	0.0402	0.0438	0.0444	0.0351	0.0253	0.0308	0.0271	0.0162		0.0374	0.041	0.0419	0.0327	0.0231	0.031	0.0272	0.0171		0.0329	0.0372	0.0378	0.0296	0.0219	0.0295	0.0246	0.0159			0.0182
49.4	0.04344	0.05251	0.0434	0.0367	0.02888	0.03313	0.02588	0.01131		18.4	0.073	0.08	0.077	0.067	0.038	0.056	0.051	0.021		49.4	0.0402	0.0435	0.0443	0.0353	0.0251	0.0309	0.0269	0.0166		0.0374	0.0409	0.0418	0.0328	0.023	0.0311	0.027	0.0171		0.0329	0.037	0.0378	0.0295	0.0218	0.0295	0.0245	0.0159			0.0182
49.6	0.04304	0.05251	0.0433	0.0361	0.02738	0.03453	0.02753	0.01041		18.45	0.073	0.08	0.077	0.068	0.038	0.057	0.051	0.022		49.6	0.04	0.0433	0.0443	0.0355	0.0248	0.0311	0.0269	0.0168		0.0372	0.0408	0.0417	0.033	0.023	0.0312	0.0269	0.017		0.0328	0.0368	0.0378	0.0295	0.0218	0.0295	0.0244	0.0158			0.0182
49.8	0.04249	0.05171	0.04445	0.03975	0.02538	0.03398	0.02883	0.00971		18.5	0.073	0.08	0.077	0.068	0.039	0.057	0.051	0.022		49.8	0.0396	0.0431	0.0443	0.0355	0.0246	0.031	0.0269	0.0166		0.037	0.0406	0.0416	0.0331	0.0229	0.0312	0.0268	0.0169		0.0326	0.0366	0.0377	0.0295	0.0217	0.0295	0.0244	0.0158			0.0182
50	0.04239	0.05001	0.045	0.0376	0.02483	0.03468	0.02748	0.00906		18.55	0.072	0.08	0.077	0.068	0.039	0.057	0.051	0.022		50	0.0392	0.043	0.0443	0.0353	0.0245	0.0309	0.0268	0.0161		0.0367	0.0404	0.0415	0.033	0.0229	0.0312	0.0268	0.0169		0.0324	0.0364	0.0375	0.0294	0.0216	0.0295	0.0244	0.0158			0.0181
50.2	0.04259	0.05041	0.04595	0.0335	0.02613	0.03388	0.02698	0.00796		18.6	0.072	0.079	0.077	0.068	0.039	0.057	0.051	0.021		50.2	0.0388	0.043	0.0442	0.035	0.0243	0.0308	0.0267	0.0157		0.0363	0.0402	0.0415	0.0329	0.0228	0.031	0.0268	0.0169		0.0322	0.0364	0.0374	0.0293	0.0215	0.0294	0.0243	0.0158			0.0181
50.4	0.04254	0.04936	0.04655	0.0344	0.02563	0.03033	0.02438	0.00691		18.65	0.072	0.079	0.077	0.067	0.039	0.057	0.051	0.021		50.4	0.0384	0.0428	0.044	0.0347	0.0241	0.0307	0.0267	0.0159		0.036	0.0402	0.0413	0.0327	0.0227	0.0309	0.0268	0.0169		0.032	0.0365	0.0372	0.0291	0.0214	0.0292	0.0242	0.0157			0.0181
50.6	0.04204	0.04721	0.0469	0.03245	0.02723	0.03223	0.02578	0.00696		18.7	0.072	0.079	0.077	0.068	0.039	0.057	0.051	0.021		50.6	0.0385	0.0431	0.0437	0.0344	0.024	0.0308	0.0266	0.0163		0.0359	0.0403	0.041	0.0325	0.0226	0.0307	0.0267	0.0168		0.0319	0.0367	0.0371	0.029	0.0213	0.0291	0.0241	0.0157			0.0181
50.8	0.04019	0.04906	0.0447	0.03315	0.02708	0.03233	0.02558	0.01161		18.75	0.072	0.079	0.076	0.068	0.039	0.056	0.051	0.022		50.8	0.0386	0.0431	0.0436	0.0342	0.0241	0.0307	0.0266	0.0165		0.0359	0.0404	0.0409	0.0323	0.0225	0.0306	0.0267	0.0167		0.0319	0.0368	0.0371	0.0288	0.0212	0.0289	0.024	0.0156			0.0181
51	0.04139	0.05221	0.0451	0.03345	0.02838	0.03128	0.02553	0.00841		18.8	0.071	0.079	0.076	0.067	0.04	0.057	0.051	0.022		51	0.0389	0.0428	0.0434	0.034	0.0242	0.0305	0.0266	0.0164		0.036	0.0404	0.0408	0.0321	0.0224	0.0304	0.0266	0.0168		0.0319	0.0367	0.0371	0.0287	0.0211	0.0288	0.0239	0.0156			0.018
51.2	0.04239	0.05371	0.04835	0.03225	0.02573	0.03063	0.02433	0.00726		18.85	0.071	0.078	0.077	0.067	0.04	0.057	0.051	0.021		51.2	0.0392	0.0424	0.0431	0.0338	0.0245	0.0302	0.0263	0.0163		0.0361	0.0403	0.0407	0.0319	0.0223	0.0302	0.0264	0.0168		0.032	0.0366	0.0371	0.0286	0.021	0.0288	0.0238	0.0155			0.018
51.4	0.04139	0.05551	0.04905	0.03665	0.02133	0.03273	0.02803	0.00786		18.9	0.071	0.078	0.075	0.067	0.04	0.057	0.051	0.021		51.4	0.0392	0.042	0.0432	0.0338	0.0248	0.0299	0.0262	0.0159		0.0362	0.0401	0.0407	0.0318	0.0223	0.0301	0.0264	0.0167		0.032	0.0364	0.037	0.0286	0.021	0.0287	0.0237	0.0154			0.018
51.6	0.04179	0.05151	0.04905	0.03475	0.02613	0.03153	0.02648	0.00711		18.95	0.071	0.078	0.076	0.067	0.04	0.057	0.051	0.021		51.6	0.0392	0.0418	0.043	0.0338	0.025	0.0296	0.0262	0.0156		0.0361	0.0397	0.0407	0.0317	0.0223	0.0301	0.0263	0.0166		0.0319	0.0362	0.037	0.0286	0.0209	0.0288	0.0236	0.0154			0.018
51.8	0.04184	0.05046	0.04605	0.03135	0.02563	0.03168	0.02643	0.01131		19	0.071	0.078	0.076	0.067	0.04	0.056	0.051	0.021		51.8	0.0391	0.0417	0.0429	0.0339	0.025	0.0295	0.0261	0.0157		0.036	0.0394	0.0406	0.0318	0.0223	0.0301	0.0262	0.0165		0.0318	0.0359	0.0369	0.0286	0.0209	0.0288	0.0236	0.0154			0.018
52	0.04174	0.04981	0.0467	0.0337	0.02628	0.03248	0.02408	0.01006		19.05	0.07	0.078	0.075	0.067	0.04	0.056	0.051	0.021		52	0.0388	0.0419	0.0429	0.0341	0.0248	0.0295	0.0263	0.016		0.0359	0.0392	0.0404	0.0318	0.0223	0.0301	0.0262	0.0165		0.0317	0.0358	0.0368	0.0286	0.0209	0.0287	0.0235	0.0153			0.018
52.2	0.04159	0.05051	0.0458	0.03215	0.02628	0.03213	0.02638	0.00931		19.1	0.07	0.078	0.075	0.067	0.04	0.056	0.051	0.021		52.2	0.0384	0.0422	0.0431	0.0341	0.0245	0.0296	0.0264	0.0162		0.0356	0.0394	0.0403	0.0319	0.0223	0.0301	0.0261	0.0166		0.0316	0.0357	0.0366	0.0285	0.0208	0.0287	0.0235	0.0153			0.018
52.4	0.04234	0.04901	0.0442	0.03025	0.02803	0.03283	0.02643	0.00961		19.15	0.07	0.077	0.075	0.067	0.04	0.056	0.051	0.021		52.4	0.0383	0.0423	0.043	0.0338	0.024	0.0297	0.0263	0.0163		0.0354	0.0396	0.04	0.0318	0.0222	0.0301	0.0261	0.0166		0.0316	0.0358	0.0365	0.0284	0.0208	0.0285	0.0235	0.0153			0.018
52.6	0.04139	0.04846	0.0439	0.0321	0.02723	0.03203	0.02578	0.00716		19.2	0.07	0.077	0.075	0.067	0.04	0.056	0.051	0.021		52.6	0.0384	0.0423	0.043	0.0336	0.0236	0.0299	0.0263	0.016		0.0355	0.04	0.04	0.0316	0.022	0.03	0.026	0.0165		0.0316	0.036	0.0365	0.0283	0.0207	0.0284	0.0234	0.0153			0.018
52.8	0.04189	0.04981	0.0443	0.0347	0.02803	0.03218	0.02773	0.00786		19.25	0.07	0.077	0.075	0.067	0.041	0.056	0.051	0.021		52.8	0.0385	0.0425	0.0431	0.0334	0.0234	0.03	0.0262	0.0158		0.0356	0.0402	0.0401	0.0314	0.0219	0.0298	0.026	0.0165		0.0316	0.0362	0.0365	0.0282	0.0206	0.0283	0.0233	0.0153			0.018
53	0.04054	0.04801	0.04655	0.0356	0.02718	0.03193	0.02558	0.01456		19.3	0.069	0.077	0.074	0.067	0.04	0.056	0.051	0.021		53	0.0386	0.0424	0.0431	0.0332	0.0233	0.03	0.026	0.0158		0.0357	0.0402	0.0402	0.0313	0.0218	0.0296	0.0258	0.0165		0.0316	0.0364	0.0366	0.0281	0.0205	0.0283	0.0232	0.0153			0.018
53.2	0.04124	0.04881	0.04805	0.0364	0.02553	0.03183	0.02553	0.01186		19.35	0.069	0.077	0.074	0.066	0.04	0.056	0.051	0.021		53.2	0.039	0.0423	0.0431	0.0332	0.0236	0.03	0.0259	0.016		0.0359	0.0401	0.0403	0.0312	0.0218	0.0296	0.0257	0.0165		0.0317	0.0364	0.0367	0.0281	0.0205	0.0282	0.0232	0.0152			0.0181
53.4	0.04109	0.05056	0.046	0.0338	0.02408	0.03078	0.02488	0.01056		19.4	0.069	0.077	0.074	0.066	0.04	0.056	0.051	0.022		53.4	0.039	0.042	0.0431	0.0334	0.0239	0.0299	0.0258	0.0162		0.036	0.04	0.0403	0.0313	0.0219	0.0295	0.0257	0.0165		0.0318	0.0364	0.0368	0.0281	0.0205	0.0282	0.0231	0.0152			0.0181
53.6	0.03969	0.04791	0.0456	0.0334	0.02448	0.02938	0.02538	0.00836		19.45	0.069	0.077	0.074	0.066	0.04	0.056	0.051	0.022		53.6	0.0389	0.0417	0.0433	0.0336	0.0243	0.0296	0.0257	0.0164		0.036	0.0399	0.0403	0.0314	0.0219	0.0296	0.0256	0.0165		0.0318	0.0363	0.0368	0.0282	0.0205	0.0283	0.0231	0.0152			0.0181
53.8	0.04064	0.04806	0.0439	0.0344	0.02483	0.02958	0.02413	0.00651		19.5	0.068	0.076	0.074	0.066	0.04	0.056	0.051	0.021		53.8	0.0389	0.0417	0.0432	0.0336	0.0244	0.0294	0.0255	0.0163		0.0359	0.0398	0.0403	0.0315	0.022	0.0296	0.0256	0.0165		0.0318	0.0363	0.0368	0.0283	0.0205	0.0283	0.0231	0.0152			0.0181
54	0.04084	0.04751	0.04185	0.03395	0.02583	0.02893	0.02758	0.00726		19.55	0.068	0.076	0.073	0.066	0.04	0.056	0.051	0.021		54	0.0386	0.0421	0.0431	0.0338	0.0244	0.029	0.0255	0.016		0.0359	0.0398	0.0403	0.0315	0.022	0.0296	0.0257	0.0164		0.0318	0.0362	0.0368	0.0283	0.0206	0.0284	0.0231	0.0152			0.0181
54.2	0.04159	0.04726	0.0421	0.034	0.02768	0.03103	0.02573	0.00611		19.6	0.068	0.076	0.073	0.065	0.04	0.056	0.051	0.021		54.2	0.0384	0.0422	0.0431	0.0336	0.0241	0.0288	0.0255	0.0156		0.0358	0.0399	0.0403	0.0314	0.0219	0.0295	0.0257	0.0164		0.0318	0.0362	0.0367	0.0283	0.0205	0.0283	0.0231	0.0152			0.0181
54.4	0.04069	0.04511	0.04545	0.03155	0.02603	0.03038	0.02628	0.01371		19.65	0.068	0.076	0.074	0.065	0.04	0.056	0.051	0.022		54.4	0.0385	0.0423	0.043	0.0334	0.0237	0.0288	0.0255	0.0154		0.0357	0.04	0.0404	0.0313	0.0217	0.0295	0.0256	0.0163		0.0318	0.0361	0.0367	0.0282	0.0205	0.0283	0.0231	0.0152			0.0181
54.6	0.04009	0.04501	0.045	0.0318	0.02658	0.02943	0.02558	0.01146		19.7	0.068	0.076	0.073	0.065	0.04	0.056	0.05	0.021		54.6	0.0384	0.0422	0.043	0.0334	0.0232	0.0289	0.0256	0.0155		0.0356	0.0399	0.0403	0.0312	0.0216	0.0296	0.0256	0.0164		0.0318	0.0361	0.0367	0.0282	0.0205	0.0283	0.0231	0.0152			0.0181
54.8	0.04179	0.04626	0.0444	0.0348	0.02683	0.03263	0.02483	0.01091		19.75	0.068	0.076	0.072	0.065	0.041	0.055	0.05	0.021		54.8	0.0383	0.0422	0.0429	0.0333	0.0229	0.0292	0.0257	0.0156		0.0356	0.04	0.0403	0.0312	0.0215	0.0296	0.0255	0.0164		0.0318	0.0361	0.0367	0.0281	0.0204	0.0282	0.0231	0.0152			0.0182
55	0.04049	0.04616	0.0447	0.03425	0.02593	0.03088	0.02518	0.00861		19.8	0.068	0.075	0.073	0.065	0.041	0.055	0.05	0.021		55	0.0384	0.0421	0.0425	0.0331	0.0228	0.0295	0.0256	0.016		0.0356	0.0401	0.0401	0.0313	0.0215	0.0296	0.0254	0.0164		0.0317	0.0361	0.0367	0.0281	0.0204	0.0282	0.023	0.0152			0.0182
55.2	0.04019	0.04836	0.0437	0.0363	0.02438	0.03133	0.02708	0.00791		19.85	0.068	0.075	0.072	0.065	0.04	0.055	0.05	0.021		55.2	0.0387	0.0419	0.0426	0.0332	0.023	0.0295	0.0254	0.0162		0.0357	0.0399	0.04	0.0313	0.0216	0.0295	0.0254	0.0164		0.0317	0.0361	0.0367	0.0281	0.0204	0.0282	0.023	0.0151			0.0182
55.4	0.03954	0.04836	0.04	0.03365	0.02603	0.03108	0.02533	0.00911		19.9	0.068	0.075	0.072	0.065	0.041	0.055	0.05	0.021		55.4	0.0386	0.0415	0.0427	0.0331	0.0234	0.0292	0.0251	0.0163		0.0358	0.0398	0.04	0.0313	0.0216	0.0294	0.0254	0.0163		0.0317	0.0361	0.0366	0.0281	0.0204	0.0282	0.023	0.0151			0.0182
55.6	0.04109	0.04606	0.0408	0.03345	0.02588	0.03258	0.02628	0.00806		19.95	0.068	0.075	0.072	0.064	0.04	0.055	0.05	0.021		55.6	0.0387	0.0416	0.0426	0.033	0.0237	0.0289	0.0249	0.0162		0.0357	0.0396	0.0401	0.0313	0.0217	0.0293	0.0254	0.0163		0.0316	0.036	0.0366	0.0281	0.0204	0.0282	0.023	0.0151			0.0182
55.8	0.03924	0.04586	0.0403	0.028	0.02653	0.03048	0.02703	0.01056		20	0.067	0.075	0.071	0.064	0.04	0.055	0.05	0.021		55.8	0.0386	0.0417	0.0425	0.0331	0.0239	0.0286	0.025	0.0161		0.0357	0.0395	0.0401	0.0312	0.0217	0.0292	0.0254	0.0164		0.0316	0.036	0.0366	0.0281	0.0204	0.0282	0.023	0.0151			0.0182
56	0.04089	0.04686	0.04255	0.03015	0.02328	0.03063	0.02338	0.01326		20.05	0.067	0.075	0.072	0.064	0.04	0.055	0.05	0.021		56	0.0383	0.0418	0.0426	0.0333	0.024	0.0284	0.025	0.0159		0.0356	0.0394	0.04	0.0312	0.0217	0.0292	0.0254	0.0164		0.0316	0.0359	0.0366	0.0281	0.0204	0.0282	0.023	0.0152			0.0182
56.2	0.03964	0.04566	0.0474	0.0316	0.02688	0.03163	0.02453	0.01221		20.1	0.067	0.075	0.072	0.064	0.04	0.055	0.05	0.021		56.2	0.0381	0.0419	0.0426	0.0332	0.0238	0.0285	0.0249	0.0159		0.0355	0.0396	0.04	0.0312	0.0217	0.0292	0.0254	0.0164		0.0316	0.0359	0.0365	0.0281	0.0204	0.0282	0.023	0.0152			0.0182
56.4	0.04044	0.04701	0.04665	0.03495	0.02383	0.03103	0.02658	0.00876		20.15	0.067	0.074	0.072	0.064	0.04	0.054	0.05	0.021		56.4	0.0381	0.042	0.0425	0.0334	0.0234	0.0286	0.0249	0.0159		0.0355	0.0398	0.04	0.0312	0.0217	0.0293	0.0253	0.0164		0.0316	0.0359	0.0365	0.0281	0.0204	0.0282	0.023	0.0152			0.0182
56.6	0.03984	0.04766	0.0441	0.0367	0.02303	0.02678	0.02953	0.00726		20.2	0.067	0.074	0.072	0.064	0.041	0.054	0.05	0.021		56.6	0.038	0.0419	0.0425	0.0334	0.0231	0.0288	0.0249	0.0158		0.0355	0.0399	0.0401	0.0312	0.0216	0.0293	0.0253	0.0163		0.0316	0.0359	0.0365	0.0281	0.0204	0.0281	0.023	0.0152			0.0182
56.8	0.03959	0.04881	0.04155	0.03715	0.02368	0.03143	0.02478	0.00686		20.25	0.067	0.074	0.071	0.063	0.041	0.054	0.049	0.021		56.8	0.0379	0.0418	0.0424	0.0334	0.0228	0.029	0.0249	0.0155		0.0355	0.0399	0.0401	0.0311	0.0214	0.0293	0.0253	0.0162		0.0316	0.0359	0.0365	0.0281	0.0204	0.0281	0.023	0.0152			0.0182
57	0.03969	0.04786	0.04115	0.035	0.02653	0.03098	0.02458	0.00656		20.3	0.067	0.074	0.071	0.063	0.04	0.054	0.05	0.021		57	0.0378	0.0417	0.0424	0.0332	0.0226	0.0293	0.025	0.0152		0.0354	0.0398	0.0402	0.0311	0.0214	0.0293	0.0253	0.0162		0.0316	0.0359	0.0365	0.028	0.0204	0.0281	0.023	0.0152			0.0182
57.2	0.04039	0.04791	0.0403	0.03245	0.02473	0.03228	0.02583	0.01061		20.35	0.067	0.074	0.071	0.063	0.041	0.054	0.049	0.022		57.2	0.0378	0.0416	0.0424	0.0332	0.0225	0.0295	0.0251	0.0152		0.0353	0.0397	0.0402	0.031	0.0213	0.0294	0.0252	0.0162		0.0315	0.0359	0.0365	0.028	0.0203	0.0281	0.023	0.0152			0.0182
57.4	0.04034	0.04641	0.044	0.0335	0.02658	0.03008	0.02678	0.00926		20.4	0.067	0.074	0.071	0.063	0.04	0.054	0.049	0.022		57.4	0.0379	0.0417	0.0423	0.033	0.0227	0.0293	0.0251	0.0157		0.0353	0.0396	0.04	0.0311	0.0213	0.0294	0.0252	0.0162		0.0315	0.0359	0.0365	0.028	0.0203	0.0281	0.0229	0.0151			0.0182
57.6	0.03999	0.04511	0.0445	0.0347	0.02628	0.03228	0.02723	0.00916		20.45	0.067	0.074	0.071	0.063	0.04	0.054	0.049	0.021		57.6	0.038	0.0417	0.0424	0.0329	0.023	0.0289	0.025	0.0163		0.0353	0.0396	0.0399	0.0311	0.0214	0.0294	0.0251	0.0162		0.0314	0.0359	0.0365	0.028	0.0203	0.0281	0.0229	0.0151			0.0182
57.8	0.04029	0.04691	0.04435	0.03565	0.02483	0.03128	0.02218	0.00806		20.5	0.067	0.074	0.07	0.063	0.04	0.054	0.049	0.021		57.8	0.038	0.0416	0.0424	0.0326	0.0232	0.0284	0.0248	0.0167		0.0353	0.0397	0.0398	0.0311	0.0215	0.0293	0.0251	0.0163		0.0314	0.0359	0.0364	0.028	0.0203	0.0281	0.0229	0.0151			0.0182
58	0.03929	0.04796	0.0429	0.03775	0.02178	0.03178	0.02563	0.00641		20.55	0.067	0.073	0.07	0.063	0.04	0.054	0.049	0.021		58	0.038	0.0414	0.0424	0.0325	0.0234	0.028	0.0247	0.0165		0.0353	0.0397	0.0398	0.0311	0.0215	0.0291	0.0251	0.0163		0.0313	0.0359	0.0364	0.0279	0.0203	0.0281	0.0229	0.0151			0.0182
58.2	0.03889	0.04771	0.04365	0.03545	0.02333	0.03128	0.02398	0.00636		20.6	0.067	0.074	0.071	0.063	0.04	0.054	0.049	0.021		58.2	0.0379	0.0416	0.0423	0.0324	0.0234	0.0278	0.0248	0.0159		0.0354	0.0396	0.0399	0.0309	0.0215	0.029	0.0252	0.0162		0.0313	0.0359	0.0364	0.0279	0.0202	0.028	0.0229	0.0151			0.0182
58.4	0.03924	0.04696	0.0409	0.03015	0.02478	0.03193	0.02653	0.00866		20.65	0.067	0.073	0.071	0.062	0.04	0.054	0.049	0.021		58.4	0.0378	0.0416	0.0422	0.0325	0.0233	0.0278	0.0247	0.0151		0.0353	0.0395	0.04	0.0308	0.0214	0.0289	0.0252	0.0161		0.0314	0.0359	0.0364	0.0279	0.0202	0.028	0.0229	0.0151			0.0182
58.6	0.04034	0.04641	0.0404	0.03315	0.02518	0.03053	0.02438	0.01056		20.7	0.066	0.073	0.07	0.063	0.04	0.053	0.049	0.021		58.6	0.0377	0.0417	0.0421	0.0326	0.0232	0.028	0.0247	0.0148		0.0352	0.0394	0.04	0.0308	0.0214	0.0289	0.0251	0.0162		0.0314	0.0358	0.0364	0.0279	0.0202	0.028	0.0228	0.0151			0.0182
58.8	0.03974	0.04586	0.04215	0.03125	0.02648	0.03018	0.02423	0.00891		20.75	0.066	0.073	0.07	0.062	0.04	0.053	0.049	0.021		58.8	0.0376	0.0419	0.042	0.0328	0.0229	0.0285	0.0248	0.0149		0.0351	0.0394	0.0399	0.0308	0.0213	0.029	0.0251	0.0162		0.0313	0.0358	0.0363	0.0279	0.0202	0.028	0.0228	0.0151			0.0182
59										20.8	0.066	0.073	0.071	0.062	0.04	0.053	0.048	0.021		59	0.0377	0.0419	0.042	0.0329	0.0228	0.0288	0.0248	0.0153		0.0351	0.0394	0.0398	0.0309	0.0213	0.0291	0.025	0.0162		0.0313	0.0357	0.0363	0.0278	0.0202	0.028	0.0228	0.0151			0.0182
59.2										20.85	0.066	0.073	0.071	0.063	0.04	0.054	0.049	0.021		59.2	0.0377	0.0416	0.042	0.033	0.0227	0.0289	0.0247	0.0158		0.0351	0.0394	0.0397	0.0309	0.0213	0.0292	0.025	0.0163		0.0313	0.0356	0.0363	0.0278	0.0202	0.028	0.0228	0.0151			0.0182
59.4										20.9	0.066	0.073	0.07	0.062	0.04	0.053	0.049	0.021		59.4	0.0377	0.0413	0.0422	0.0327	0.0227	0.0288	0.0245	0.0159		0.0351	0.0393	0.0397	0.0309	0.0213	0.0292	0.025	0.0162		0.0312	0.0354	0.0362	0.0278	0.0201	0.028	0.0228	0.0151			0.0181
59.6										20.95	0.066	0.073	0.07	0.062	0.04	0.053	0.048	0.021		59.6	0.0376	0.0411	0.0421	0.0325	0.0228	0.0285	0.0244	0.0159		0.035	0.039	0.0397	0.0309	0.0212	0.0291	0.025	0.0161		0.0311	0.0353	0.0362	0.0278	0.0201	0.0279	0.0227	0.015			0.0181
59.8										21	0.066	0.073	0.07	0.062	0.04	0.054	0.048	0.021		59.8	0.0374	0.0408	0.0419	0.0325	0.023	0.0282	0.0245	0.0156		0.0349	0.0388	0.0396	0.0308	0.0212	0.029	0.025	0.0161		0.031	0.0351	0.0361	0.0278	0.0201	0.0279	0.0227	0.015			0.0181
60										21.05	0.066	0.073	0.07	0.062	0.04	0.054	0.048	0.021		60	0.0374	0.0408	0.0419	0.0325	0.023	0.0282	0.0245	0.0156		0.0510721	0.0559296	0.0569322	0.0462668	0.0332416	0.0433319	0.0382502	0.0234045		0.0457576	0.0513439	0.0522659	0.0420671	0.0312374	0.0415719	0.0347889	0.0222148			0.0181
										21.1	0.066	0.073	0.07	0.062	0.04	0.053	0.048	0.021
										21.15	0.066	0.073	0.07	0.062	0.04	0.053	0.048	0.021
										21.2	0.066	0.073	0.069	0.063	0.04	0.053	0.048	0.021
										21.25	0.065	0.073	0.07	0.062	0.039	0.053	0.048	0.021
										21.3	0.065	0.073	0.07	0.062	0.039	0.053	0.048	0.021
										21.35	0.065	0.072	0.069	0.062	0.039	0.053	0.048	0.021
										21.4	0.065	0.072	0.069	0.062	0.039	0.053	0.048	0.021
										21.45	0.065	0.072	0.069	0.061	0.039	0.053	0.048	0.021
										21.5	0.065	0.072	0.069	0.062	0.039	0.052	0.048	0.021
										21.55	0.065	0.072	0.069	0.062	0.039	0.052	0.048	0.021
										21.6	0.065	0.072	0.069	0.062	0.039	0.053	0.048	0.021
										21.65	0.065	0.072	0.069	0.061	0.039	0.052	0.047	0.021
										21.7	0.065	0.072	0.069	0.061	0.039	0.052	0.047	0.021
										21.75	0.065	0.072	0.069	0.061	0.039	0.052	0.047	0.021
										21.8	0.065	0.071	0.069	0.061	0.039	0.052	0.047	0.021
										21.85	0.065	0.071	0.069	0.061	0.039	0.052	0.048	0.021
										21.9	0.064	0.071	0.069	0.061	0.039	0.052	0.048	0.021
										21.95	0.064	0.071	0.069	0.061	0.039	0.052	0.047	0.021
										22	0.064	0.071	0.068	0.06	0.038	0.052	0.047	0.021
										22.05	0.064	0.071	0.068	0.061	0.038	0.052	0.047	0.021
										22.1	0.064	0.071	0.068	0.061	0.039	0.052	0.047	0.021
										22.15	0.064	0.071	0.068	0.061	0.039	0.051	0.047	0.021
										22.2	0.064	0.071	0.068	0.06	0.038	0.051	0.047	0.021
										22.25	0.064	0.071	0.067	0.06	0.038	0.051	0.047	0.021
										22.3	0.064	0.071	0.068	0.06	0.038	0.052	0.047	0.021
										22.35	0.063	0.07	0.068	0.06	0.038	0.051	0.047	0.021
										22.4	0.063	0.07	0.068	0.06	0.038	0.051	0.047	0.021
										22.45	0.063	0.07	0.067	0.06	0.038	0.051	0.047	0.021
										22.5	0.063	0.07	0.067	0.06	0.038	0.051	0.047	0.021
										22.55	0.063	0.07	0.067	0.06	0.037	0.051	0.047	0.021
										22.6	0.063	0.07	0.068	0.06	0.038	0.051	0.047	0.021
										22.65	0.063	0.07	0.067	0.06	0.038	0.051	0.047	0.021
										22.7	0.063	0.07	0.067	0.06	0.038	0.051	0.047	0.021
										22.75	0.063	0.07	0.067	0.059	0.038	0.051	0.046	0.021
										22.8	0.063	0.07	0.067	0.06	0.038	0.051	0.046	0.02
										22.85	0.063	0.07	0.067	0.059	0.038	0.051	0.046	0.02
										22.9	0.063	0.07	0.067	0.059	0.038	0.051	0.046	0.02
										22.95	0.063	0.07	0.067	0.059	0.037	0.051	0.046	0.021
										23	0.063	0.07	0.067	0.059	0.037	0.05	0.046	0.021
										23.05	0.063	0.07	0.066	0.059	0.037	0.051	0.046	0.02
										23.1	0.062	0.07	0.067	0.059	0.037	0.051	0.046	0.02
										23.15	0.062	0.07	0.066	0.059	0.037	0.051	0.046	0.02
										23.2	0.062	0.07	0.066	0.059	0.037	0.05	0.046	0.021
										23.25	0.062	0.07	0.066	0.059	0.037	0.05	0.046	0.021
										23.3	0.062	0.069	0.067	0.059	0.037	0.05	0.046	0.02
										23.35	0.062	0.07	0.066	0.059	0.037	0.05	0.046	0.02
										23.4	0.062	0.07	0.066	0.059	0.037	0.05	0.046	0.02
										23.45	0.062	0.069	0.066	0.059	0.037	0.05	0.046	0.02
										23.5	0.062	0.069	0.067	0.058	0.037	0.05	0.046	0.02
										23.55	0.062	0.069	0.066	0.059	0.037	0.05	0.045	0.02
										23.6	0.062	0.069	0.066	0.059	0.037	0.05	0.045	0.02
										23.65	0.062	0.069	0.066	0.058	0.037	0.05	0.045	0.02
										23.7	0.062	0.069	0.066	0.058	0.037	0.05	0.045	0.02
										23.75	0.062	0.069	0.066	0.058	0.037	0.05	0.045	0.02
										23.8	0.062	0.069	0.066	0.058	0.037	0.05	0.045	0.02
										23.85	0.062	0.069	0.066	0.058	0.036	0.05	0.045	0.021
										23.9	0.062	0.069	0.066	0.058	0.037	0.05	0.045	0.02
										23.95	0.062	0.069	0.066	0.058	0.037	0.05	0.045	0.02
										24	0.062	0.069	0.066	0.058	0.037	0.05	0.045	0.02
										24.05	0.062	0.069	0.066	0.058	0.037	0.05	0.045	0.02
										24.1	0.062	0.069	0.066	0.058	0.036	0.05	0.045	0.02
										24.15	0.062	0.069	0.066	0.058	0.036	0.05	0.045	0.02
										24.2	0.062	0.069	0.066	0.058	0.036	0.05	0.045	0.02
										24.25	0.062	0.069	0.065	0.058	0.036	0.05	0.045	0.02
										24.3	0.062	0.069	0.066	0.058	0.036	0.05	0.045	0.02
										24.35	0.062	0.069	0.066	0.058	0.036	0.049	0.045	0.02
										24.4	0.062	0.069	0.065	0.058	0.036	0.049	0.045	0.02
										24.45	0.061	0.069	0.065	0.058	0.036	0.049	0.045	0.02
										24.5	0.061	0.069	0.066	0.058	0.036	0.049	0.045	0.02
										24.55	0.061	0.069	0.066	0.058	0.036	0.049	0.045	0.02
										24.6	0.061	0.068	0.065	0.057	0.036	0.049	0.045	0.02
										24.65	0.061	0.069	0.065	0.058	0.036	0.049	0.045	0.02
										24.7	0.061	0.069	0.065	0.058	0.036	0.049	0.045	0.02
										24.75	0.061	0.069	0.065	0.058	0.036	0.049	0.045	0.02
										24.8	0.061	0.068	0.066	0.057	0.036	0.049	0.044	0.02
										24.85	0.061	0.068	0.065	0.058	0.036	0.049	0.044	0.02
										24.9	0.061	0.068	0.065	0.057	0.036	0.049	0.044	0.02
										24.95	0.061	0.069	0.065	0.058	0.036	0.049	0.044	0.02
										25	0.061	0.069	0.065	0.057	0.035	0.049	0.044	0.02
										25.05	0.061	0.068	0.065	0.057	0.036	0.049	0.045	0.02
										25.1	0.061	0.069	0.065	0.057	0.036	0.049	0.044	0.02
										25.15	0.061	0.068	0.065	0.057	0.036	0.049	0.044	0.02
										25.2	0.061	0.068	0.065	0.057	0.036	0.049	0.044	0.02
										25.25	0.061	0.068	0.065	0.057	0.036	0.049	0.044	0.02
										25.3	0.061	0.068	0.065	0.057	0.036	0.049	0.044	0.02
										25.35	0.061	0.068	0.065	0.057	0.035	0.048	0.044	0.02
										25.4	0.061	0.068	0.065	0.057	0.035	0.048	0.044	0.02
										25.45	0.061	0.068	0.065	0.057	0.036	0.049	0.044	0.02
										25.5	0.061	0.068	0.065	0.057	0.035	0.049	0.044	0.02
										25.55	0.061	0.068	0.065	0.057	0.035	0.049	0.044	0.02
										25.6	0.061	0.068	0.065	0.057	0.035	0.048	0.044	0.02
										25.65	0.061	0.068	0.065	0.057	0.036	0.049	0.044	0.02
										25.7	0.061	0.068	0.065	0.057	0.036	0.049	0.044	0.02
										25.75	0.061	0.068	0.064	0.057	0.036	0.049	0.044	0.02
										25.8	0.061	0.068	0.065	0.057	0.035	0.048	0.044	0.02
										25.85	0.061	0.068	0.065	0.057	0.035	0.048	0.044	0.02
										25.9	0.061	0.068	0.065	0.057	0.035	0.048	0.044	0.02
										25.95	0.061	0.068	0.065	0.057	0.035	0.048	0.044	0.02
										26	0.061	0.068	0.064	0.057	0.035	0.048	0.044	0.02
										26.05	0.061	0.067	0.064	0.057	0.035	0.049	0.044	0.02
										26.1	0.061	0.067	0.064	0.057	0.035	0.049	0.044	0.02
										26.15	0.061	0.067	0.064	0.057	0.035	0.048	0.044	0.02
										26.2	0.06	0.067	0.064	0.057	0.035	0.048	0.044	0.02
										26.25	0.06	0.067	0.064	0.057	0.035	0.048	0.044	0.02
										26.3	0.06	0.067	0.064	0.057	0.035	0.048	0.044	0.02
										26.35	0.06	0.067	0.064	0.057	0.035	0.048	0.044	0.02
										26.4	0.06	0.067	0.064	0.057	0.035	0.049	0.044	0.02
										26.45	0.06	0.067	0.064	0.056	0.035	0.048	0.044	0.02
										26.5	0.06	0.067	0.064	0.057	0.035	0.048	0.044	0.02
										26.55	0.06	0.067	0.064	0.056	0.035	0.048	0.044	0.02
										26.6	0.06	0.067	0.064	0.057	0.035	0.048	0.044	0.02
										26.65	0.059	0.067	0.063	0.057	0.035	0.048	0.044	0.02
										26.7	0.059	0.067	0.064	0.057	0.035	0.048	0.044	0.019
										26.75	0.059	0.066	0.064	0.056	0.035	0.048	0.044	0.019
										26.8	0.059	0.066	0.063	0.056	0.035	0.048	0.043	0.019
										26.85	0.059	0.066	0.063	0.056	0.035	0.048	0.043	0.02
										26.9	0.059	0.066	0.064	0.056	0.035	0.048	0.043	0.02
										26.95	0.059	0.066	0.063	0.056	0.035	0.048	0.043	0.02
										27	0.059	0.066	0.063	0.056	0.035	0.048	0.043	0.02
										27.05	0.059	0.066	0.063	0.056	0.035	0.048	0.043	0.02
										27.1	0.059	0.066	0.063	0.056	0.035	0.048	0.043	0.02
										27.15	0.059	0.066	0.063	0.056	0.035	0.048	0.043	0.02
										27.2	0.058	0.066	0.063	0.056	0.035	0.048	0.043	0.02
										27.25	0.058	0.066	0.063	0.056	0.035	0.047	0.043	0.02
										27.3	0.058	0.066	0.063	0.056	0.034	0.048	0.043	0.02
										27.35	0.058	0.066	0.063	0.056	0.034	0.048	0.043	0.02
										27.4	0.058	0.066	0.063	0.055	0.034	0.048	0.043	0.019
										27.45	0.058	0.065	0.062	0.056	0.034	0.047	0.043	0.019
										27.5	0.058	0.065	0.062	0.055	0.034	0.047	0.043	0.019
										27.55	0.058	0.065	0.062	0.056	0.034	0.047	0.043	0.02
										27.6	0.058	0.065	0.062	0.055	0.034	0.047	0.043	0.02
										27.65	0.058	0.065	0.062	0.055	0.034	0.047	0.043	0.02
										27.7	0.058	0.065	0.062	0.055	0.034	0.047	0.043	0.019
										27.75	0.058	0.065	0.062	0.055	0.034	0.047	0.043	0.019
										27.8	0.057	0.065	0.062	0.055	0.034	0.047	0.043	0.019
										27.85	0.057	0.065	0.062	0.055	0.034	0.047	0.043	0.019
										27.9	0.057	0.065	0.062	0.055	0.034	0.047	0.043	0.019
										27.95	0.057	0.065	0.062	0.055	0.034	0.047	0.043	0.019
										28	0.057	0.065	0.061	0.055	0.034	0.047	0.043	0.019
										28.05	0.057	0.065	0.061	0.054	0.034	0.047	0.042	0.019
										28.1	0.057	0.065	0.062	0.054	0.034	0.047	0.042	0.019
										28.15	0.057	0.065	0.062	0.054	0.034	0.047	0.042	0.019
										28.2	0.057	0.065	0.061	0.054	0.034	0.047	0.042	0.019
										28.25	0.057	0.064	0.061	0.054	0.034	0.047	0.042	0.019
										28.3	0.057	0.064	0.061	0.054	0.034	0.047	0.042	0.019
										28.35	0.057	0.065	0.061	0.054	0.034	0.047	0.042	0.019
										28.4	0.057	0.065	0.061	0.054	0.034	0.046	0.042	0.019
										28.45	0.057	0.064	0.062	0.054	0.034	0.046	0.042	0.019
										28.5	0.057	0.064	0.061	0.054	0.034	0.047	0.042	0.019
										28.55	0.057	0.064	0.061	0.054	0.034	0.046	0.042	0.019
										28.6	0.057	0.064	0.062	0.054	0.034	0.046	0.042	0.019
										28.65	0.057	0.064	0.061	0.054	0.034	0.046	0.042	0.019
										28.7	0.057	0.064	0.061	0.054	0.034	0.046	0.042	0.019
										28.75	0.057	0.064	0.061	0.054	0.034	0.046	0.042	0.019
										28.8	0.057	0.064	0.061	0.054	0.034	0.046	0.042	0.019
										28.85	0.057	0.064	0.061	0.054	0.034	0.046	0.042	0.019
										28.9	0.057	0.064	0.061	0.054	0.034	0.046	0.042	0.019
										28.95	0.057	0.064	0.061	0.054	0.033	0.046	0.042	0.019
										29	0.057	0.064	0.06	0.054	0.034	0.046	0.042	0.019
										29.05	0.057	0.064	0.061	0.054	0.034	0.046	0.042	0.019
										29.1	0.057	0.064	0.061	0.054	0.034	0.046	0.042	0.019
										29.15	0.057	0.064	0.061	0.054	0.034	0.046	0.042	0.019
										29.2	0.057	0.064	0.061	0.054	0.034	0.046	0.042	0.019
										29.25	0.057	0.064	0.061	0.053	0.034	0.046	0.042	0.019
										29.3	0.057	0.064	0.061	0.054	0.034	0.046	0.042	0.019
										29.35	0.057	0.064	0.061	0.054	0.033	0.046	0.042	0.019
										29.4	0.057	0.064	0.061	0.053	0.034	0.046	0.041	0.019
										29.45	0.057	0.064	0.061	0.053	0.033	0.046	0.041	0.019
										29.5	0.057	0.064	0.061	0.053	0.034	0.046	0.042	0.019
										29.55	0.057	0.064	0.061	0.054	0.033	0.046	0.042	0.019
										29.6	0.057	0.064	0.061	0.054	0.033	0.045	0.041	0.019
										29.65	0.057	0.064	0.061	0.054	0.033	0.046	0.041	0.019
										29.7	0.057	0.063	0.061	0.053	0.033	0.046	0.041	0.019
										29.75	0.056	0.063	0.061	0.053	0.033	0.046	0.041	0.019
										29.8	0.056	0.063	0.061	0.054	0.034	0.046	0.041	0.019
										29.85	0.057	0.063	0.06	0.054	0.033	0.046	0.041	0.019
										29.9	0.056	0.063	0.06	0.053	0.033	0.046	0.041	0.019
										29.95	0.056	0.063	0.061	0.053	0.033	0.045	0.041	0.019
										30	0.056	0.063	0.06	0.054	0.033	0.046	0.041	0.019
										30.05	0.056	0.063	0.06	0.053	0.033	0.046	0.041	0.019
										30.1	0.056	0.063	0.06	0.053	0.033	0.045	0.041	0.019
										30.15	0.056	0.063	0.06	0.054	0.033	0.046	0.041	0.019
										30.2	0.056	0.063	0.06	0.053	0.033	0.045	0.041	0.019
										30.25	0.056	0.063	0.06	0.053	0.033	0.045	0.041	0.019
										30.3	0.056	0.063	0.06	0.053	0.033	0.045	0.041	0.019
										30.35	0.056	0.063	0.06	0.053	0.033	0.045	0.041	0.019
										30.4	0.056	0.063	0.06	0.053	0.033	0.045	0.041	0.019
										30.45	0.056	0.063	0.06	0.053	0.032	0.045	0.041	0.019
										30.5	0.056	0.063	0.06	0.053	0.032	0.045	0.041	0.019
										30.55	0.056	0.063	0.06	0.053	0.032	0.045	0.041	0.019
										30.6	0.056	0.063	0.06	0.053	0.032	0.045	0.041	0.019
										30.65	0.056	0.063	0.06	0.053	0.032	0.045	0.041	0.019
										30.7	0.056	0.063	0.06	0.053	0.032	0.045	0.041	0.019
										30.75	0.056	0.063	0.06	0.053	0.032	0.045	0.041	0.019
										30.8	0.056	0.063	0.06	0.053	0.032	0.045	0.041	0.019
										30.85	0.056	0.063	0.06	0.053	0.032	0.045	0.041	0.019
										30.9	0.055	0.063	0.06	0.053	0.032	0.045	0.041	0.019
										30.95	0.055	0.063	0.06	0.053	0.033	0.045	0.041	0.019
										31	0.055	0.062	0.06	0.053	0.032	0.045	0.041	0.019
										31.05	0.055	0.062	0.06	0.052	0.032	0.045	0.041	0.019
										31.1	0.055	0.062	0.059	0.052	0.032	0.045	0.041	0.019
										31.15	0.055	0.062	0.06	0.052	0.032	0.045	0.041	0.019
										31.2	0.055	0.062	0.06	0.053	0.032	0.045	0.041	0.019
										31.25	0.055	0.062	0.06	0.052	0.032	0.045	0.041	0.019
										31.3	0.055	0.062	0.059	0.052	0.032	0.045	0.041	0.019
										31.35	0.055	0.062	0.059	0.052	0.032	0.045	0.041	0.019
										31.4	0.055	0.062	0.06	0.052	0.032	0.045	0.041	0.019
										31.45	0.055	0.062	0.06	0.052	0.032	0.045	0.04	0.019
										31.5	0.055	0.062	0.059	0.052	0.032	0.044	0.04	0.019
										31.55	0.055	0.062	0.059	0.052	0.032	0.044	0.04	0.019
										31.6	0.055	0.062	0.059	0.052	0.032	0.045	0.041	0.019
										31.65	0.055	0.062	0.059	0.052	0.032	0.045	0.04	0.019
										31.7	0.055	0.062	0.059	0.052	0.032	0.044	0.04	0.019
										31.75	0.055	0.062	0.059	0.052	0.032	0.045	0.04	0.018
										31.8	0.054	0.061	0.059	0.052	0.032	0.044	0.04	0.018
										31.85	0.054	0.061	0.059	0.052	0.032	0.045	0.041	0.019
										31.9	0.054	0.061	0.059	0.052	0.032	0.044	0.04	0.019
										31.95	0.054	0.061	0.059	0.052	0.032	0.044	0.04	0.019
										32	0.054	0.061	0.059	0.052	0.032	0.044	0.04	0.019
										32.05	0.054	0.061	0.058	0.052	0.032	0.044	0.04	0.018
										32.1	0.054	0.061	0.059	0.052	0.032	0.044	0.04	0.018
										32.15	0.054	0.061	0.059	0.052	0.032	0.044	0.04	0.018
										32.2	0.054	0.061	0.058	0.051	0.032	0.044	0.04	0.018
										32.25	0.054	0.061	0.058	0.051	0.032	0.044	0.04	0.019
										32.3	0.054	0.061	0.058	0.051	0.032	0.044	0.04	0.019
										32.35	0.053	0.061	0.058	0.051	0.032	0.044	0.04	0.019
										32.4	0.053	0.061	0.058	0.051	0.032	0.044	0.04	0.018
										32.45	0.053	0.061	0.058	0.052	0.032	0.044	0.04	0.018
										32.5	0.053	0.061	0.058	0.051	0.032	0.044	0.04	0.018
										32.55	0.053	0.06	0.058	0.051	0.031	0.044	0.04	0.018
										32.6	0.053	0.06	0.058	0.051	0.032	0.044	0.04	0.019
										32.65	0.053	0.06	0.057	0.051	0.032	0.044	0.04	0.018
										32.7	0.053	0.06	0.057	0.051	0.032	0.044	0.04	0.018
										32.75	0.053	0.06	0.058	0.051	0.031	0.044	0.04	0.018
										32.8	0.053	0.06	0.058	0.051	0.032	0.044	0.04	0.018
										32.85	0.053	0.06	0.057	0.051	0.031	0.043	0.04	0.019
										32.9	0.053	0.06	0.057	0.051	0.031	0.043	0.039	0.019
										32.95	0.053	0.06	0.057	0.051	0.031	0.043	0.039	0.018
										33	0.053	0.06	0.057	0.05	0.031	0.043	0.039	0.018
										33.05	0.053	0.06	0.057	0.051	0.031	0.043	0.039	0.018
										33.1	0.053	0.06	0.057	0.051	0.031	0.043	0.039	0.018
										33.15	0.053	0.06	0.057	0.05	0.031	0.043	0.039	0.018
										33.2	0.052	0.06	0.057	0.05	0.031	0.043	0.039	0.018
										33.25	0.052	0.06	0.057	0.05	0.031	0.043	0.039	0.019
										33.3	0.052	0.06	0.057	0.05	0.031	0.043	0.039	0.019
										33.35	0.052	0.06	0.057	0.05	0.031	0.043	0.039	0.018
										33.4	0.052	0.059	0.057	0.05	0.031	0.043	0.039	0.018
										33.45	0.052	0.06	0.056	0.05	0.031	0.043	0.039	0.018
										33.5	0.052	0.06	0.056	0.05	0.031	0.043	0.039	0.018
										33.55	0.052	0.06	0.056	0.05	0.031	0.043	0.039	0.018
										33.6	0.052	0.059	0.056	0.05	0.031	0.043	0.039	0.018
										33.65	0.052	0.059	0.056	0.05	0.031	0.043	0.039	0.018
										33.7	0.052	0.059	0.057	0.05	0.031	0.043	0.039	0.018
										33.75	0.052	0.059	0.056	0.05	0.031	0.043	0.039	0.018
										33.8	0.052	0.059	0.056	0.05	0.031	0.043	0.039	0.018
										33.85	0.052	0.059	0.057	0.05	0.031	0.043	0.039	0.018
										33.9	0.052	0.059	0.056	0.049	0.031	0.043	0.039	0.018
										33.95	0.052	0.059	0.056	0.049	0.031	0.043	0.039	0.018
										34	0.052	0.059	0.056	0.049	0.03	0.043	0.038	0.018
										34.05	0.052	0.059	0.056	0.049	0.031	0.043	0.038	0.018
										34.1	0.052	0.059	0.056	0.049	0.031	0.042	0.039	0.018
										34.15	0.052	0.059	0.056	0.049	0.03	0.043	0.038	0.018
										34.2	0.052	0.059	0.056	0.049	0.031	0.043	0.038	0.018
										34.25	0.052	0.059	0.056	0.049	0.031	0.042	0.038	0.018
										34.3	0.052	0.059	0.056	0.049	0.031	0.042	0.038	0.018
										34.35	0.052	0.059	0.056	0.049	0.031	0.042	0.038	0.018
										34.4	0.052	0.059	0.056	0.049	0.031	0.042	0.038	0.018
										34.45	0.052	0.059	0.056	0.049	0.031	0.042	0.038	0.018
										34.5	0.052	0.059	0.056	0.049	0.03	0.042	0.038	0.018
										34.55	0.052	0.059	0.056	0.049	0.031	0.042	0.038	0.018
										34.6	0.052	0.059	0.056	0.049	0.03	0.043	0.038	0.018
										34.65	0.052	0.059	0.056	0.049	0.03	0.042	0.038	0.018
										34.7	0.052	0.058	0.056	0.049	0.03	0.042	0.038	0.018
										34.75	0.052	0.058	0.056	0.049	0.03	0.042	0.038	0.018
										34.8	0.052	0.058	0.056	0.049	0.03	0.042	0.038	0.018
										34.85	0.051	0.058	0.056	0.049	0.03	0.042	0.038	0.018
										34.9	0.052	0.058	0.055	0.049	0.03	0.042	0.038	0.018
										34.95	0.051	0.058	0.056	0.049	0.03	0.042	0.038	0.018
										35	0.051	0.058	0.056	0.049	0.03	0.042	0.038	0.018
										35.05	0.051	0.058	0.055	0.049	0.03	0.042	0.038	0.018
										35.1	0.051	0.058	0.055	0.049	0.03	0.042	0.038	0.018
										35.15	0.051	0.058	0.056	0.049	0.03	0.042	0.038	0.018
										35.2	0.051	0.058	0.055	0.049	0.03	0.042	0.038	0.018
										35.25	0.051	0.058	0.055	0.049	0.03	0.042	0.038	0.018
										35.3	0.051	0.058	0.055	0.049	0.03	0.042	0.038	0.018
										35.35	0.051	0.058	0.055	0.049	0.03	0.042	0.038	0.018
										35.4	0.051	0.058	0.055	0.049	0.03	0.042	0.038	0.018
										35.45	0.051	0.058	0.055	0.049	0.03	0.042	0.038	0.018
										35.5	0.051	0.058	0.055	0.049	0.03	0.042	0.038	0.018
										35.55	0.051	0.058	0.055	0.049	0.03	0.042	0.038	0.018
										35.6	0.051	0.057	0.055	0.048	0.03	0.042	0.038	0.018
										35.65	0.05	0.058	0.055	0.048	0.03	0.042	0.038	0.018
										35.7	0.05	0.057	0.055	0.049	0.03	0.042	0.038	0.018
										35.75	0.05	0.057	0.055	0.049	0.03	0.042	0.037	0.018
										35.8	0.05	0.057	0.055	0.048	0.03	0.042	0.037	0.018
										35.85	0.05	0.057	0.055	0.048	0.03	0.042	0.037	0.018
										35.9	0.05	0.057	0.054	0.048	0.029	0.042	0.038	0.018
										35.95	0.05	0.057	0.054	0.048	0.029	0.041	0.038	0.018
										36	0.05	0.057	0.055	0.048	0.03	0.041	0.038	0.018
										36.05	0.05	0.057	0.055	0.048	0.03	0.041	0.037	0.018
										36.1	0.05	0.057	0.054	0.048	0.029	0.041	0.037	0.018
										36.15	0.05	0.057	0.054	0.048	0.03	0.041	0.037	0.018
										36.2	0.05	0.056	0.054	0.048	0.029	0.041	0.037	0.018
										36.25	0.049	0.056	0.054	0.048	0.029	0.041	0.037	0.018
										36.3	0.049	0.056	0.054	0.048	0.029	0.041	0.037	0.018
										36.35	0.049	0.056	0.054	0.048	0.029	0.041	0.037	0.018
										36.4	0.049	0.056	0.054	0.048	0.029	0.041	0.037	0.018
										36.45	0.049	0.056	0.054	0.047	0.029	0.041	0.037	0.018
										36.5	0.049	0.056	0.054	0.047	0.029	0.041	0.037	0.018
										36.55	0.049	0.056	0.054	0.047	0.029	0.041	0.037	0.017
										36.6	0.049	0.056	0.053	0.047	0.029	0.041	0.037	0.017
										36.65	0.049	0.056	0.053	0.047	0.029	0.041	0.037	0.018
										36.7	0.049	0.056	0.053	0.047	0.029	0.041	0.037	0.018
										36.75	0.049	0.056	0.054	0.047	0.029	0.041	0.037	0.018
										36.8	0.049	0.056	0.053	0.047	0.029	0.041	0.037	0.018
										36.85	0.048	0.056	0.053	0.047	0.029	0.041	0.037	0.018
										36.9	0.048	0.056	0.053	0.047	0.029	0.041	0.037	0.018
										36.95	0.048	0.056	0.053	0.047	0.029	0.041	0.037	0.018
										37	0.048	0.056	0.053	0.047	0.029	0.041	0.037	0.017
										37.05	0.048	0.056	0.053	0.047	0.029	0.041	0.037	0.017
										37.1	0.048	0.056	0.053	0.047	0.029	0.04	0.036	0.017
										37.15	0.048	0.056	0.053	0.047	0.029	0.04	0.037	0.017
										37.2	0.048	0.055	0.053	0.047	0.029	0.04	0.036	0.017
										37.25	0.048	0.055	0.053	0.046	0.029	0.04	0.036	0.017
										37.3	0.048	0.055	0.053	0.046	0.029	0.04	0.036	0.017
										37.35	0.048	0.055	0.053	0.046	0.029	0.04	0.036	0.017
										37.4	0.048	0.055	0.052	0.046	0.029	0.04	0.036	0.017
										37.45	0.048	0.055	0.053	0.046	0.029	0.04	0.036	0.017
										37.5	0.048	0.055	0.053	0.046	0.029	0.04	0.036	0.017
										37.55	0.048	0.055	0.052	0.046	0.029	0.04	0.036	0.017
										37.6	0.048	0.055	0.052	0.046	0.029	0.04	0.036	0.018
										37.65	0.048	0.055	0.052	0.046	0.028	0.04	0.036	0.017
										37.7	0.048	0.055	0.052	0.046	0.029	0.04	0.036	0.017
										37.75	0.048	0.055	0.052	0.046	0.028	0.04	0.036	0.017
										37.8	0.048	0.055	0.052	0.046	0.028	0.04	0.036	0.017
										37.85	0.048	0.055	0.052	0.046	0.028	0.04	0.036	0.017
										37.9	0.047	0.055	0.052	0.045	0.028	0.04	0.036	0.017
										37.95	0.048	0.055	0.052	0.045	0.028	0.04	0.036	0.017
										38	0.048	0.055	0.052	0.046	0.028	0.04	0.036	0.017
										38.05	0.048	0.055	0.052	0.045	0.028	0.04	0.036	0.017
										38.1	0.048	0.054	0.052	0.046	0.028	0.04	0.036	0.017
										38.15	0.048	0.054	0.052	0.046	0.028	0.04	0.036	0.017
										38.2	0.047	0.054	0.052	0.045	0.028	0.04	0.036	0.017
										38.25	0.047	0.054	0.052	0.045	0.028	0.04	0.036	0.017
										38.3	0.047	0.054	0.052	0.045	0.028	0.039	0.036	0.017
										38.35	0.047	0.054	0.052	0.045	0.028	0.039	0.036	0.017
										38.4	0.047	0.054	0.051	0.045	0.028	0.039	0.035	0.017
										38.45	0.047	0.054	0.051	0.045	0.028	0.039	0.035	0.017
										38.5	0.047	0.054	0.051	0.045	0.028	0.039	0.035	0.017
										38.55	0.047	0.054	0.051	0.045	0.028	0.039	0.035	0.017
										38.6	0.047	0.054	0.052	0.045	0.028	0.039	0.035	0.017
										38.65	0.047	0.054	0.051	0.045	0.028	0.039	0.035	0.017
										38.7	0.047	0.054	0.051	0.045	0.028	0.039	0.035	0.017
										38.75	0.047	0.053	0.051	0.045	0.028	0.039	0.035	0.017
										38.8	0.047	0.053	0.051	0.045	0.028	0.039	0.035	0.017
										38.85	0.047	0.053	0.051	0.045	0.028	0.039	0.035	0.017
										38.9	0.047	0.053	0.051	0.045	0.028	0.039	0.035	0.017
										38.95	0.047	0.053	0.051	0.045	0.028	0.039	0.035	0.017
										39	0.047	0.053	0.051	0.045	0.028	0.039	0.035	0.017
										39.05	0.047	0.053	0.051	0.045	0.028	0.039	0.035	0.017
										39.1	0.046	0.053	0.051	0.045	0.028	0.039	0.035	0.017
										39.15	0.046	0.053	0.051	0.044	0.028	0.039	0.035	0.017
										39.2	0.046	0.053	0.051	0.044	0.028	0.039	0.035	0.017
										39.25	0.046	0.053	0.051	0.044	0.028	0.039	0.035	0.017
										39.3	0.046	0.053	0.051	0.045	0.028	0.038	0.035	0.017
										39.35	0.046	0.053	0.051	0.045	0.028	0.039	0.035	0.017
										39.4	0.046	0.053	0.05	0.045	0.028	0.039	0.035	0.017
										39.45	0.046	0.053	0.05	0.044	0.028	0.039	0.035	0.017
										39.5	0.046	0.053	0.05	0.044	0.028	0.039	0.035	0.017
										39.55	0.046	0.053	0.051	0.044	0.027	0.039	0.035	0.017
										39.6	0.046	0.053	0.05	0.044	0.027	0.038	0.035	0.017
										39.65	0.046	0.053	0.05	0.044	0.027	0.038	0.035	0.017
										39.7	0.046	0.053	0.05	0.044	0.027	0.038	0.035	0.017
										39.75	0.046	0.053	0.05	0.044	0.027	0.038	0.035	0.017
										39.8	0.046	0.053	0.05	0.044	0.027	0.038	0.035	0.017
										39.85	0.046	0.053	0.05	0.044	0.027	0.038	0.035	0.017
										39.9	0.045	0.053	0.05	0.044	0.027	0.038	0.034	0.017
										39.95	0.045	0.052	0.05	0.044	0.027	0.038	0.034	0.017
										40	0.045	0.053	0.05	0.044	0.027	0.038	0.034	0.017
										40.05	0.045	0.053	0.05	0.044	0.027	0.038	0.034	0.017
										40.1	0.045	0.052	0.05	0.044	0.027	0.038	0.034	0.017
										40.15	0.045	0.052	0.05	0.044	0.027	0.038	0.034	0.017
										40.2	0.045	0.052	0.05	0.044	0.027	0.038	0.034	0.017
										40.25	0.045	0.052	0.05	0.044	0.027	0.038	0.034	0.017
										40.3	0.045	0.052	0.05	0.044	0.027	0.038	0.034	0.017
										40.35	0.045	0.052	0.049	0.044	0.027	0.038	0.034	0.017
										40.4	0.045	0.052	0.049	0.044	0.027	0.038	0.034	0.017
										40.45	0.045	0.052	0.05	0.043	0.027	0.038	0.034	0.017
										40.5	0.045	0.052	0.05	0.043	0.027	0.038	0.034	0.017
										40.55	0.045	0.052	0.049	0.043	0.027	0.038	0.034	0.017
										40.6	0.045	0.052	0.049	0.043	0.027	0.038	0.034	0.017
										40.65	0.045	0.052	0.049	0.043	0.027	0.038	0.034	0.017
										40.7	0.045	0.052	0.049	0.043	0.027	0.038	0.034	0.016
										40.75	0.044	0.052	0.049	0.043	0.027	0.038	0.034	0.016
										40.8	0.044	0.052	0.049	0.043	0.027	0.038	0.034	0.016
										40.85	0.044	0.052	0.049	0.043	0.027	0.037	0.034	0.016
										40.9	0.044	0.051	0.049	0.043	0.027	0.037	0.034	0.016
										40.95	0.044	0.051	0.049	0.043	0.026	0.037	0.034	0.017
										41	0.044	0.051	0.049	0.043	0.027	0.037	0.034	0.017
										41.05	0.044	0.051	0.049	0.043	0.027	0.037	0.034	0.017
										41.1	0.044	0.051	0.049	0.043	0.027	0.037	0.034	0.017
										41.15	0.044	0.051	0.049	0.043	0.026	0.037	0.034	0.017
										41.2	0.044	0.051	0.048	0.043	0.026	0.037	0.034	0.016
										41.25	0.044	0.051	0.049	0.042	0.026	0.037	0.033	0.016
										41.3	0.044	0.051	0.048	0.042	0.026	0.037	0.034	0.016
										41.35	0.044	0.051	0.048	0.043	0.026	0.037	0.034	0.016
										41.4	0.044	0.051	0.048	0.043	0.026	0.037	0.033	0.016
										41.45	0.044	0.051	0.048	0.042	0.026	0.037	0.033	0.016
										41.5	0.044	0.051	0.048	0.042	0.026	0.037	0.033	0.016
										41.55	0.044	0.05	0.048	0.042	0.026	0.037	0.033	0.016
										41.6	0.043	0.05	0.048	0.042	0.026	0.037	0.033	0.016
										41.65	0.043	0.05	0.048	0.042	0.026	0.037	0.033	0.016
										41.7	0.043	0.05	0.048	0.042	0.026	0.037	0.033	0.016
										41.75	0.043	0.05	0.048	0.042	0.026	0.037	0.033	0.016
										41.8	0.043	0.05	0.048	0.042	0.026	0.037	0.033	0.016
										41.85	0.043	0.05	0.048	0.042	0.026	0.037	0.033	0.016
										41.9	0.043	0.05	0.048	0.042	0.026	0.037	0.033	0.016
										41.95	0.043	0.05	0.048	0.042	0.026	0.036	0.033	0.016
										42	0.043	0.05	0.047	0.042	0.026	0.036	0.033	0.016
										42.05	0.043	0.05	0.048	0.042	0.026	0.036	0.033	0.016
										42.1	0.043	0.05	0.048	0.042	0.026	0.037	0.033	0.016
										42.15	0.043	0.05	0.047	0.042	0.026	0.037	0.033	0.016
										42.2	0.043	0.05	0.047	0.042	0.026	0.036	0.033	0.016
										42.25	0.043	0.05	0.047	0.042	0.026	0.036	0.033	0.016
										42.3	0.043	0.05	0.047	0.042	0.026	0.036	0.033	0.016
										42.35	0.042	0.049	0.047	0.042	0.026	0.036	0.033	0.016
										42.4	0.042	0.049	0.047	0.041	0.026	0.036	0.033	0.016
										42.45	0.042	0.049	0.047	0.041	0.026	0.036	0.033	0.016
										42.5	0.042	0.049	0.047	0.041	0.026	0.036	0.033	0.016
										42.55	0.042	0.049	0.047	0.041	0.025	0.036	0.033	0.016
										42.6	0.042	0.049	0.047	0.041	0.025	0.036	0.033	0.016
										42.65	0.042	0.049	0.047	0.041	0.025	0.036	0.032	0.016
										42.7	0.042	0.049	0.047	0.041	0.025	0.036	0.032	0.016
										42.75	0.042	0.049	0.047	0.041	0.025	0.036	0.032	0.016
										42.8	0.042	0.049	0.047	0.041	0.025	0.036	0.032	0.016
										42.85	0.042	0.049	0.046	0.041	0.025	0.036	0.032	0.016
										42.9	0.042	0.049	0.046	0.041	0.025	0.036	0.032	0.016
										42.95	0.042	0.048	0.046	0.041	0.025	0.036	0.032	0.016
										43	0.041	0.049	0.046	0.04	0.025	0.036	0.032	0.016
										43.05	0.041	0.048	0.046	0.041	0.025	0.036	0.032	0.016
										43.1	0.041	0.048	0.046	0.041	0.025	0.036	0.032	0.016
										43.15	0.041	0.048	0.046	0.041	0.025	0.035	0.032	0.016
										43.2	0.041	0.048	0.046	0.041	0.025	0.036	0.032	0.016
										43.25	0.041	0.048	0.046	0.04	0.025	0.035	0.032	0.016
										43.3	0.041	0.048	0.046	0.04	0.025	0.035	0.032	0.016
										43.35	0.041	0.048	0.046	0.04	0.025	0.035	0.032	0.016
										43.4	0.041	0.048	0.046	0.04	0.025	0.035	0.032	0.016
										43.45	0.041	0.048	0.046	0.04	0.025	0.035	0.032	0.016
										43.5	0.041	0.048	0.046	0.04	0.025	0.035	0.032	0.016
										43.55	0.041	0.048	0.046	0.04	0.025	0.035	0.032	0.016
										43.6	0.041	0.048	0.045	0.04	0.025	0.035	0.032	0.016
										43.65	0.041	0.048	0.045	0.04	0.025	0.035	0.032	0.016
										43.7	0.041	0.048	0.045	0.04	0.025	0.035	0.032	0.016
										43.75	0.041	0.048	0.045	0.04	0.025	0.035	0.032	0.016
										43.8	0.041	0.048	0.045	0.04	0.025	0.035	0.032	0.016
										43.85	0.041	0.048	0.045	0.04	0.025	0.035	0.032	0.016
										43.9	0.041	0.048	0.045	0.04	0.025	0.035	0.032	0.016
										43.95	0.041	0.047	0.045	0.04	0.025	0.035	0.031	0.016
										44	0.04	0.048	0.045	0.039	0.024	0.035	0.031	0.016
										44.05	0.04	0.047	0.045	0.039	0.024	0.035	0.031	0.016
										44.1	0.04	0.047	0.045	0.039	0.025	0.035	0.031	0.016
										44.15	0.04	0.047	0.045	0.039	0.025	0.035	0.031	0.016
										44.2	0.04	0.047	0.045	0.039	0.024	0.034	0.031	0.016
										44.25	0.04	0.047	0.045	0.039	0.024	0.034	0.031	0.016
										44.3	0.04	0.047	0.045	0.039	0.024	0.035	0.031	0.016
										44.35	0.04	0.047	0.045	0.039	0.024	0.035	0.031	0.016
										44.4	0.04	0.047	0.045	0.039	0.024	0.035	0.031	0.016
										44.45	0.04	0.047	0.045	0.039	0.024	0.035	0.031	0.015
										44.5	0.04	0.047	0.045	0.039	0.024	0.034	0.031	0.015
										44.55	0.04	0.047	0.045	0.039	0.024	0.034	0.031	0.015
										44.6	0.04	0.047	0.045	0.039	0.024	0.034	0.031	0.015
										44.65	0.04	0.047	0.044	0.039	0.024	0.034	0.031	0.015
										44.7	0.04	0.047	0.044	0.039	0.024	0.034	0.031	0.016
										44.75	0.04	0.047	0.044	0.039	0.024	0.034	0.031	0.016
										44.8	0.04	0.047	0.044	0.039	0.024	0.034	0.031	0.016
										44.85	0.04	0.047	0.044	0.039	0.024	0.034	0.031	0.016
										44.9	0.04	0.047	0.044	0.039	0.024	0.034	0.031	0.016
										44.95	0.04	0.047	0.044	0.039	0.024	0.034	0.031	0.016
										45	0.04	0.047	0.044	0.039	0.024	0.034	0.03	0.015
										45.05	0.04	0.047	0.044	0.039	0.024	0.034	0.031	0.015
										45.1	0.04	0.047	0.044	0.038	0.024	0.034	0.031	0.015
										45.15	0.04	0.047	0.044	0.038	0.024	0.034	0.031	0.015
										45.2	0.04	0.047	0.044	0.039	0.024	0.034	0.031	0.015
										45.25	0.04	0.047	0.044	0.039	0.024	0.034	0.03	0.015
										45.3	0.04	0.047	0.044	0.039	0.024	0.034	0.03	0.015
										45.35	0.04	0.046	0.044	0.038	0.024	0.034	0.03	0.015
										45.4	0.039	0.046	0.044	0.038	0.024	0.034	0.03	0.015
										45.45	0.039	0.046	0.044	0.038	0.024	0.034	0.03	0.015
										45.5	0.039	0.046	0.044	0.038	0.023	0.034	0.03	0.015
										45.55	0.039	0.046	0.044	0.038	0.023	0.034	0.03	0.015
										45.6	0.039	0.046	0.044	0.038	0.024	0.034	0.03	0.015
										45.65	0.039	0.046	0.044	0.038	0.024	0.034	0.03	0.015
										45.7	0.039	0.046	0.044	0.038	0.023	0.033	0.03	0.015
										45.75	0.039	0.046	0.044	0.038	0.024	0.033	0.03	0.015
										45.8	0.039	0.046	0.044	0.038	0.024	0.033	0.03	0.015
										45.85	0.039	0.046	0.044	0.038	0.023	0.034	0.03	0.015
										45.9	0.039	0.046	0.044	0.038	0.023	0.034	0.03	0.015
										45.95	0.039	0.046	0.044	0.038	0.023	0.034	0.03	0.015
										46	0.039	0.046	0.044	0.038	0.023	0.033	0.03	0.015
										46.05	0.039	0.046	0.044	0.038	0.023	0.033	0.03	0.015
										46.1	0.039	0.046	0.044	0.038	0.023	0.033	0.03	0.015
										46.15	0.039	0.046	0.043	0.038	0.023	0.033	0.03	0.015
										46.2	0.039	0.046	0.044	0.038	0.023	0.033	0.03	0.015
										46.25	0.039	0.046	0.044	0.038	0.023	0.033	0.03	0.015
										46.3	0.039	0.046	0.043	0.038	0.023	0.033	0.03	0.015
										46.35	0.039	0.046	0.044	0.038	0.023	0.033	0.03	0.015
										46.4	0.039	0.046	0.043	0.038	0.023	0.033	0.03	0.015
										46.45	0.039	0.046	0.043	0.038	0.023	0.033	0.03	0.015
										46.5	0.039	0.046	0.043	0.038	0.023	0.033	0.03	0.015
										46.55	0.039	0.046	0.043	0.038	0.023	0.033	0.03	0.015
										46.6	0.039	0.046	0.043	0.038	0.023	0.033	0.03	0.015
										46.65	0.039	0.046	0.043	0.038	0.023	0.033	0.03	0.015
										46.7	0.039	0.046	0.043	0.037	0.023	0.033	0.03	0.015
										46.75	0.039	0.046	0.043	0.038	0.023	0.033	0.03	0.015
										46.8	0.039	0.046	0.043	0.038	0.023	0.033	0.03	0.015
										46.85	0.038	0.046	0.043	0.038	0.023	0.033	0.03	0.015
										46.9	0.038	0.046	0.043	0.037	0.023	0.033	0.03	0.015
										46.95	0.038	0.045	0.043	0.037	0.023	0.033	0.029	0.015
										47	0.038	0.045	0.043	0.038	0.023	0.033	0.029	0.015
										47.05	0.038	0.045	0.043	0.038	0.023	0.033	0.029	0.015
										47.1	0.038	0.045	0.043	0.037	0.023	0.033	0.029	0.015
										47.15	0.038	0.045	0.043	0.037	0.023	0.033	0.029	0.015
										47.2	0.038	0.045	0.043	0.037	0.023	0.033	0.029	0.015
										47.25	0.038	0.045	0.043	0.037	0.023	0.033	0.029	0.015
										47.3	0.038	0.045	0.043	0.037	0.023	0.033	0.029	0.015
										47.35	0.038	0.045	0.043	0.037	0.023	0.033	0.029	0.015
										47.4	0.038	0.045	0.042	0.037	0.023	0.033	0.029	0.015
										47.45	0.038	0.045	0.042	0.037	0.023	0.033	0.029	0.015
										47.5	0.038	0.045	0.042	0.037	0.023	0.032	0.029	0.015
										47.55	0.038	0.045	0.042	0.037	0.023	0.033	0.029	0.015
										47.6	0.038	0.045	0.042	0.037	0.023	0.033	0.029	0.015
										47.65	0.038	0.045	0.042	0.037	0.023	0.033	0.029	0.015
										47.7	0.038	0.045	0.042	0.037	0.023	0.032	0.029	0.015
										47.75	0.038	0.045	0.042	0.037	0.023	0.032	0.029	0.015
										47.8	0.038	0.045	0.042	0.037	0.023	0.032	0.029	0.015
										47.85	0.038	0.045	0.042	0.037	0.023	0.032	0.029	0.015
										47.9	0.038	0.045	0.042	0.037	0.023	0.032	0.029	0.015
										47.95	0.038	0.045	0.042	0.037	0.023	0.032	0.029	0.015
										48	0.038	0.045	0.042	0.037	0.023	0.032	0.029	0.015
										48.05	0.037	0.045	0.042	0.037	0.023	0.032	0.029	0.015
										48.1	0.037	0.045	0.042	0.037	0.022	0.032	0.029	0.015
										48.15	0.037	0.045	0.042	0.036	0.022	0.032	0.029	0.015
										48.2	0.038	0.045	0.042	0.036	0.022	0.032	0.029	0.015
										48.25	0.038	0.045	0.042	0.036	0.022	0.032	0.029	0.015
										48.3	0.037	0.045	0.042	0.036	0.022	0.032	0.029	0.015
										48.35	0.037	0.045	0.042	0.036	0.022	0.032	0.029	0.015
										48.4	0.037	0.045	0.042	0.036	0.022	0.032	0.029	0.015
										48.45	0.037	0.045	0.042	0.036	0.022	0.032	0.029	0.015
										48.5	0.037	0.045	0.042	0.036	0.022	0.032	0.029	0.015
										48.55	0.037	0.044	0.042	0.036	0.022	0.032	0.029	0.015
										48.6	0.037	0.044	0.042	0.036	0.022	0.032	0.029	0.015
										48.65	0.037	0.044	0.042	0.036	0.022	0.032	0.029	0.015
										48.7	0.037	0.044	0.042	0.036	0.022	0.032	0.028	0.015
										48.75	0.037	0.044	0.042	0.036	0.022	0.032	0.028	0.015
										48.8	0.037	0.044	0.042	0.036	0.022	0.032	0.028	0.015
										48.85	0.037	0.044	0.042	0.036	0.022	0.032	0.028	0.015
										48.9	0.037	0.044	0.042	0.036	0.022	0.032	0.028	0.015
										48.95	0.037	0.044	0.042	0.036	0.022	0.032	0.028	0.015
										49	0.037	0.044	0.042	0.036	0.022	0.032	0.028	0.015
										49.05	0.037	0.044	0.042	0.036	0.022	0.032	0.028	0.015
										49.1	0.037	0.044	0.042	0.036	0.022	0.032	0.028	0.015
										49.15	0.037	0.044	0.041	0.036	0.022	0.032	0.028	0.015
										49.2	0.037	0.044	0.041	0.036	0.022	0.032	0.028	0.015
										49.25	0.037	0.044	0.041	0.036	0.022	0.032	0.028	0.015
										49.3	0.037	0.044	0.041	0.036	0.022	0.032	0.028	0.014
										49.35	0.037	0.044	0.041	0.036	0.022	0.032	0.028	0.014
										49.4	0.037	0.044	0.041	0.036	0.022	0.032	0.028	0.014
										49.45	0.037	0.044	0.041	0.036	0.022	0.032	0.028	0.014
										49.5	0.037	0.044	0.041	0.036	0.022	0.032	0.028	0.014
										49.55	0.037	0.044	0.041	0.036	0.022	0.032	0.028	0.014
										49.6	0.037	0.044	0.041	0.036	0.022	0.031	0.028	0.014
										49.65	0.036	0.044	0.041	0.036	0.022	0.031	0.028	0.015
										49.7	0.036	0.044	0.041	0.036	0.022	0.031	0.028	0.015
										49.75	0.036	0.044	0.041	0.035	0.022	0.031	0.028	0.014
										49.8	0.036	0.044	0.041	0.035	0.022	0.031	0.028	0.014
										49.85	0.036	0.044	0.041	0.035	0.022	0.031	0.028	0.014
										49.9	0.036	0.044	0.041	0.035	0.022	0.031	0.028	0.014
										49.95	0.036	0.044	0.041	0.035	0.022	0.031	0.028	0.015
										50	0.036	0.044	0.041	0.035	0.022	0.031	0.028	0.015
										50.05	0.036	0.044	0.041	0.035	0.022	0.031	0.028	0.014
										50.1	0.036	0.044	0.041	0.035	0.022	0.031	0.028	0.014
										50.15	0.036	0.044	0.041	0.035	0.022	0.031	0.028	0.014
										50.2	0.036	0.044	0.041	0.035	0.022	0.031	0.028	0.014
										50.25	0.036	0.044	0.041	0.035	0.022	0.031	0.028	0.014
										50.3	0.036	0.044	0.041	0.035	0.022	0.031	0.028	0.014
										50.35	0.036	0.044	0.041	0.035	0.022	0.031	0.028	0.014
										50.4	0.036	0.044	0.041	0.035	0.022	0.031	0.028	0.014
										50.45	0.036	0.044	0.041	0.035	0.022	0.031	0.028	0.014
										50.5	0.036	0.044	0.041	0.035	0.022	0.031	0.028	0.014
										50.55	0.036	0.043	0.041	0.035	0.022	0.031	0.028	0.014
										50.6	0.036	0.043	0.04	0.035	0.022	0.031	0.028	0.014
										50.65	0.036	0.043	0.04	0.035	0.021	0.031	0.028	0.014
										50.7	0.036	0.044	0.041	0.035	0.021	0.031	0.028	0.014
										50.75	0.036	0.043	0.041	0.035	0.021	0.031	0.028	0.014
										50.8	0.036	0.043	0.041	0.035	0.021	0.031	0.028	0.014
										50.85	0.036	0.043	0.041	0.035	0.021	0.031	0.028	0.014
										50.9	0.036	0.043	0.041	0.035	0.021	0.031	0.028	0.014
										50.95	0.036	0.043	0.04	0.035	0.021	0.031	0.028	0.014
										51	0.036	0.043	0.04	0.035	0.021	0.031	0.027	0.014
										51.05	0.036	0.043	0.04	0.035	0.021	0.031	0.027	0.014
										51.1	0.036	0.043	0.041	0.035	0.021	0.031	0.028	0.014
										51.15	0.036	0.043	0.041	0.035	0.021	0.031	0.028	0.014
										51.2	0.036	0.043	0.041	0.035	0.021	0.031	0.028	0.014
										51.25	0.036	0.043	0.04	0.035	0.021	0.031	0.028	0.014
										51.3	0.036	0.043	0.04	0.035	0.021	0.031	0.027	0.014
										51.35	0.036	0.043	0.04	0.035	0.021	0.031	0.027	0.014
										51.4	0.036	0.043	0.04	0.035	0.021	0.031	0.027	0.014
										51.45	0.036	0.043	0.04	0.035	0.021	0.031	0.027	0.014
										51.5	0.036	0.043	0.04	0.035	0.021	0.031	0.027	0.014
										51.55	0.036	0.043	0.04	0.035	0.021	0.031	0.027	0.014
										51.6	0.036	0.043	0.04	0.035	0.021	0.031	0.027	0.014
										51.65	0.036	0.043	0.04	0.035	0.021	0.031	0.027	0.014
										51.7	0.036	0.043	0.04	0.035	0.021	0.031	0.027	0.014
										51.75	0.036	0.043	0.04	0.035	0.021	0.03	0.027	0.014
										51.8	0.036	0.043	0.04	0.035	0.021	0.031	0.027	0.014
										51.85	0.036	0.043	0.04	0.035	0.021	0.031	0.027	0.014
										51.9	0.036	0.043	0.04	0.035	0.021	0.031	0.027	0.014
										51.95	0.036	0.043	0.04	0.035	0.021	0.03	0.027	0.014
										52	0.036	0.043	0.04	0.035	0.021	0.03	0.027	0.014
										52.05	0.036	0.043	0.04	0.035	0.021	0.03	0.027	0.014
										52.1	0.036	0.043	0.04	0.035	0.021	0.03	0.027	0.014
										52.15	0.036	0.043	0.04	0.034	0.021	0.031	0.027	0.014
										52.2	0.036	0.043	0.04	0.034	0.021	0.031	0.027	0.014
										52.25	0.036	0.043	0.04	0.034	0.021	0.03	0.027	0.014
										52.3	0.036	0.043	0.04	0.034	0.021	0.03	0.027	0.014
										52.35	0.036	0.043	0.04	0.034	0.021	0.03	0.027	0.014
										52.4	0.036	0.043	0.04	0.034	0.021	0.03	0.027	0.014
										52.45	0.036	0.043	0.04	0.034	0.021	0.03	0.027	0.014
										52.5	0.036	0.043	0.04	0.034	0.021	0.03	0.027	0.014
										52.55	0.036	0.043	0.04	0.034	0.021	0.03	0.027	0.014
										52.6	0.036	0.043	0.04	0.034	0.021	0.03	0.027	0.014
										52.65	0.035	0.043	0.04	0.034	0.021	0.03	0.027	0.014
										52.7	0.035	0.043	0.04	0.034	0.021	0.03	0.027	0.014
										52.75	0.035	0.043	0.04	0.034	0.021	0.03	0.027	0.014
										52.8	0.035	0.043	0.04	0.034	0.021	0.03	0.027	0.014
										52.85	0.035	0.043	0.04	0.034	0.021	0.03	0.027	0.014
										52.9	0.035	0.043	0.04	0.034	0.021	0.03	0.027	0.014
										52.95	0.035	0.043	0.04	0.034	0.021	0.03	0.027	0.014
										53	0.035	0.043	0.04	0.034	0.021	0.03	0.027	0.014
										53.05	0.035	0.043	0.04	0.034	0.021	0.03	0.027	0.014
										53.1	0.035	0.043	0.04	0.034	0.021	0.03	0.027	0.014
										53.15	0.035	0.043	0.04	0.034	0.021	0.03	0.027	0.014
										53.2	0.035	0.043	0.04	0.034	0.021	0.03	0.027	0.014
										53.25	0.035	0.043	0.04	0.034	0.021	0.03	0.027	0.014
										53.3	0.035	0.043	0.04	0.034	0.021	0.03	0.027	0.014
										53.35	0.035	0.043	0.04	0.034	0.021	0.03	0.027	0.014
										53.4	0.035	0.043	0.04	0.034	0.021	0.03	0.027	0.014
										53.45	0.035	0.043	0.04	0.034	0.021	0.03	0.027	0.014
										53.5	0.035	0.043	0.04	0.034	0.021	0.03	0.027	0.014
										53.55	0.035	0.043	0.04	0.034	0.021	0.03	0.027	0.014
										53.6	0.035	0.043	0.04	0.034	0.021	0.03	0.027	0.014
										53.65	0.035	0.043	0.04	0.034	0.021	0.03	0.027	0.014
										53.7	0.035	0.043	0.04	0.034	0.021	0.03	0.027	0.014
										53.75	0.035	0.043	0.039	0.034	0.021	0.03	0.027	0.014
										53.8	0.035	0.043	0.04	0.034	0.021	0.03	0.027	0.014
										53.85	0.035	0.042	0.04	0.034	0.021	0.03	0.027	0.014
										53.9	0.035	0.042	0.04	0.034	0.021	0.03	0.027	0.014
										53.95	0.035	0.043	0.04	0.034	0.021	0.03	0.027	0.014
										54	0.035	0.043	0.04	0.034	0.021	0.03	0.027	0.014
										54.05	0.035	0.043	0.04	0.034	0.021	0.03	0.027	0.014
										54.1	0.035	0.043	0.039	0.034	0.021	0.03	0.027	0.014
										54.15	0.035	0.043	0.04	0.034	0.021	0.03	0.027	0.014
										54.2	0.035	0.043	0.04	0.034	0.021	0.03	0.027	0.014
										54.25	0.035	0.043	0.04	0.034	0.021	0.03	0.027	0.014
										54.3	0.035	0.043	0.04	0.034	0.021	0.03	0.027	0.014
										54.35	0.035	0.042	0.04	0.034	0.021	0.03	0.027	0.014
										54.4	0.035	0.042	0.039	0.034	0.021	0.03	0.027	0.014
										54.45	0.035	0.042	0.039	0.034	0.02	0.03	0.027	0.014
										54.5	0.035	0.042	0.04	0.034	0.021	0.03	0.027	0.014
										54.55	0.035	0.042	0.04	0.034	0.021	0.03	0.026	0.014
										54.6	0.035	0.042	0.04	0.034	0.021	0.03	0.027	0.014
										54.65	0.035	0.042	0.039	0.034	0.021	0.03	0.027	0.014
										54.7	0.035	0.042	0.04	0.034	0.021	0.03	0.027	0.014
										54.75	0.035	0.042	0.04	0.034	0.021	0.03	0.027	0.014
										54.8	0.035	0.042	0.04	0.034	0.021	0.03	0.026	0.014
										54.85	0.035	0.042	0.039	0.034	0.021	0.03	0.026	0.014
										54.9	0.035	0.043	0.039	0.034	0.021	0.03	0.026	0.014
										54.95	0.035	0.042	0.039	0.034	0.021	0.03	0.026	0.014
										55	0.035	0.042	0.039	0.034	0.02	0.03	0.027	0.014
										55.05	0.035	0.042	0.039	0.034	0.02	0.03	0.027	0.014
										55.1	0.035	0.043	0.039	0.034	0.02	0.03	0.026	0.014
										55.15	0.035	0.043	0.039	0.034	0.02	0.03	0.026	0.014
										55.2	0.035	0.043	0.039	0.034	0.02	0.03	0.026	0.014
										55.25	0.035	0.042	0.039	0.034	0.02	0.03	0.026	0.014
										55.3	0.035	0.042	0.039	0.034	0.02	0.03	0.026	0.014
										55.35	0.035	0.042	0.04	0.034	0.02	0.03	0.026	0.014
										55.4	0.035	0.042	0.04	0.034	0.02	0.03	0.026	0.014
										55.45	0.035	0.042	0.039	0.034	0.02	0.03	0.026	0.014
										55.5	0.035	0.042	0.039	0.034	0.02	0.03	0.026	0.014
										55.55	0.035	0.042	0.039	0.033	0.02	0.03	0.026	0.014
										55.6	0.035	0.042	0.039	0.033	0.02	0.03	0.026	0.014
										55.65	0.035	0.042	0.04	0.034	0.02	0.03	0.026	0.014
										55.7	0.035	0.042	0.04	0.034	0.02	0.03	0.026	0.014
										55.75	0.035	0.042	0.039	0.034	0.02	0.03	0.026	0.014
										55.8	0.035	0.042	0.039	0.034	0.02	0.03	0.026	0.014
										55.85	0.035	0.042	0.039	0.033	0.02	0.03	0.026	0.014
										55.9	0.035	0.042	0.039	0.033	0.02	0.03	0.026	0.014
										55.95	0.035	0.042	0.039	0.033	0.02	0.03	0.026	0.014
										56	0.035	0.042	0.039	0.034	0.02	0.03	0.026	0.014
										56.05	0.035	0.042	0.039	0.034	0.02	0.03	0.026	0.014
										56.1	0.035	0.042	0.039	0.033	0.02	0.029	0.026	0.014
										56.15	0.035	0.042	0.039	0.034	0.02	0.03	0.026	0.014
										56.2	0.035	0.042	0.039	0.034	0.02	0.03	0.026	0.014
										56.25	0.035	0.042	0.039	0.034	0.02	0.03	0.026	0.014
										56.3	0.035	0.042	0.039	0.034	0.02	0.03	0.026	0.014
										56.35	0.035	0.042	0.039	0.033	0.02	0.03	0.026	0.014
										56.4	0.035	0.042	0.039	0.033	0.02	0.03	0.026	0.014
										56.45	0.035	0.042	0.039	0.033	0.02	0.03	0.026	0.014
										56.5	0.035	0.042	0.039	0.034	0.02	0.03	0.026	0.014
										56.55	0.035	0.042	0.039	0.034	0.02	0.029	0.026	0.014
										56.6	0.035	0.042	0.039	0.033	0.02	0.029	0.026	0.014
										56.65	0.035	0.042	0.039	0.033	0.02	0.03	0.026	0.014
										56.7	0.035	0.042	0.039	0.033	0.02	0.03	0.026	0.014
										56.75	0.035	0.042	0.039	0.033	0.02	0.029	0.026	0.014
										56.8	0.035	0.042	0.039	0.033	0.02	0.029	0.026	0.014
										56.85	0.035	0.042	0.039	0.033	0.02	0.03	0.026	0.014
										56.9	0.035	0.042	0.039	0.034	0.02	0.03	0.026	0.014
										56.95	0.035	0.042	0.039	0.033	0.02	0.03	0.026	0.014
										57	0.035	0.042	0.039	0.033	0.02	0.03	0.026	0.014
										57.05	0.035	0.042	0.039	0.033	0.02	0.03	0.026	0.014
										57.1	0.035	0.042	0.039	0.033	0.02	0.029	0.026	0.014
										57.15	0.035	0.042	0.039	0.033	0.02	0.029	0.026	0.014
										57.2	0.035	0.042	0.039	0.033	0.02	0.029	0.026	0.014
										57.25	0.035	0.042	0.039	0.033	0.02	0.029	0.026	0.014
										57.3	0.035	0.042	0.039	0.033	0.02	0.029	0.026	0.014
										57.35	0.035	0.042	0.039	0.033	0.02	0.029	0.026	0.014
										57.4	0.035	0.042	0.039	0.033	0.02	0.029	0.026	0.014
										57.45	0.035	0.042	0.039	0.033	0.02	0.029	0.026	0.014
										57.5	0.035	0.042	0.039	0.033	0.02	0.029	0.026	0.014
										57.55	0.035	0.042	0.039	0.033	0.02	0.029	0.026	0.014
										57.6	0.035	0.042	0.039	0.033	0.02	0.029	0.026	0.014
										57.65	0.035	0.042	0.039	0.033	0.02	0.029	0.026	0.014
										57.7	0.035	0.042	0.039	0.033	0.02	0.029	0.026	0.014
										57.75	0.035	0.042	0.039	0.033	0.02	0.029	0.026	0.014
										57.8	0.035	0.042	0.039	0.033	0.02	0.029	0.026	0.014
										57.85	0.035	0.042	0.039	0.033	0.02	0.029	0.026	0.014
										57.9	0.035	0.042	0.039	0.033	0.02	0.029	0.026	0.014
										57.95	0.035	0.042	0.039	0.033	0.02	0.029	0.026	0.014
										58	0.035	0.042	0.039	0.033	0.02	0.029	0.026	0.014
										58.05	0.035	0.042	0.039	0.033	0.02	0.029	0.026	0.013
										58.1	0.035	0.042	0.039	0.033	0.02	0.029	0.026	0.013
										58.15	0.035	0.042	0.039	0.033	0.02	0.029	0.026	0.014
										58.2	0.035	0.042	0.039	0.033	0.02	0.03	0.026	0.014
										58.25	0.034	0.042	0.039	0.033	0.02	0.03	0.026	0.014
										58.3	0.034	0.042	0.039	0.033	0.02	0.03	0.026	0.014
										58.35	0.034	0.042	0.039	0.033	0.02	0.029	0.026	0.014
										58.4	0.034	0.042	0.039	0.033	0.02	0.029	0.026	0.014
										58.45	0.034	0.042	0.039	0.033	0.02	0.029	0.026	0.014
										58.5	0.034	0.042	0.039	0.033	0.02	0.029	0.026	0.014
										58.55	0.034	0.042	0.039	0.033	0.02	0.029	0.026	0.014
										58.6	0.034	0.042	0.039	0.033	0.02	0.029	0.026	0.014
										58.65	0.034	0.042	0.039	0.033	0.02	0.029	0.026	0.014
										58.7	0.034	0.042	0.039	0.033	0.02	0.029	0.026	0.014
										58.75	0.034	0.042	0.039	0.033	0.02	0.029	0.026	0.014
										58.8	0.034	0.042	0.039	0.033	0.02	0.029	0.026	0.014
										58.85	0.034	0.042	0.039	0.033	0.02	0.029	0.026	0.014
										58.9	0.034	0.042	0.039	0.033	0.02	0.029	0.026	0.014
										58.95	0.034	0.042	0.039	0.033	0.02	0.029	0.026	0.014
										59	0.034	0.042	0.039	0.033	0.02	0.029	0.026	0.014
										59.05	0.034	0.042	0.039	0.033	0.02	0.029	0.026	0.014
										59.1	0.034	0.042	0.039	0.033	0.02	0.029	0.026	0.014
										59.15	0.034	0.042	0.039	0.033	0.02	0.029	0.026	0.014
										59.2	0.034	0.042	0.039	0.033	0.02	0.029	0.026	0.014
										59.25	0.034	0.042	0.039	0.033	0.02	0.029	0.026	0.014
										59.3	0.034	0.042	0.039	0.033	0.02	0.029	0.026	0.014
										59.35	0.034	0.042	0.039	0.033	0.02	0.029	0.026	0.014
										59.4	0.034	0.042	0.039	0.033	0.02	0.029	0.026	0.014
										59.45	0.034	0.042	0.039	0.033	0.02	0.029	0.026	0.014
										59.5	0.034	0.042	0.039	0.033	0.02	0.029	0.026	0.014
										59.55	0.034	0.042	0.039	0.033	0.02	0.029	0.026	0.014
										59.6	0.034	0.042	0.039	0.033	0.02	0.029	0.026	0.014
										59.65	0.034	0.042	0.039	0.033	0.02	0.029	0.026	0.014
										59.7	0.034	0.042	0.039	0.033	0.02	0.029	0.026	0.014
										59.75	0.034	0.042	0.039	0.033	0.02	0.029	0.026	0.014
										59.8	0.034	0.042	0.039	0.033	0.02	0.029	0.026	0.014
										59.85	0.034	0.042	0.039	0.033	0.02	0.029	0.026	0.013
										59.9	0.034	0.042	0.039	0.033	0.02	0.029	0.026	0.013
										59.95	0.034	0.042	0.039	0.033	0.02	0.029	0.026	0.013
										60	0.034	0.041	0.039	0.033	0.02	0.029	0.026	0.013
[truncated: 7 more columns]

## Sheet: RMSE_MeshSize0.1
t	S3	S4	S5	S6	S7	S8	S9	S10		t	HEC_P3	HEC_P4	HEC_P5	HEC_P6	HEC_P7	HEC_P8	HEC_P9	HEC_P10		Error_3	Error_4	Error_5	Error_6	Error_7	Error_8	Error_9	Error_10		Error^2_3	Error^2_4	Error^2_5	Error^2_6	Error^2_7	Error^2_8	Error^2_9	Error^2_10		RMSE_3	RMSE_4	RMSE_5	RMSE_6	RMSE_7	RMSE_8	RMSE_9	RMSE_10
0	-1e-05	-4e-05	0	-0.00015	-2e-05	-7e-05	3e-05	1e-05		0	0	0	0	0	0	0	0	0		-1e-05	-4e-05	0	-0.00015	-2e-05	-7e-05	3e-05	1e-05		1e-10	1.6e-09	0	2.25e-08	4e-10	4.9e-09	9e-10	1e-10		0.833872	1.08656	0.783281	0.678051	0.48033	0.538794	0.429806	0.646679
0.2	-6e-05	1e-05	-5e-05	0.00015	8e-05	0.00013	-0.00017	1e-05		0.2	0	0	0	0	0	0	0	0		-6e-05	1e-05	-5e-05	0.00015	8e-05	0.00013	-0.00017	1e-05		3.6e-09	1e-10	2.5e-09	2.25e-08	6.4e-09	1.69e-08	2.89e-08	1e-10
0.4	0.00014	0.00011	5e-05	5e-05	3e-05	3e-05	-2e-05	1e-05		0.4	0	0	0	0	0	0	0	0		0.00014	0.00011	5e-05	5e-05	3e-05	3e-05	-2e-05	1e-05		1.96e-08	1.21e-08	2.5e-09	2.5e-09	9e-10	9e-10	4e-10	1e-10
0.6	-1e-05	-9e-05	-0.0001	-5e-05	-7e-05	8e-05	-2e-05	-4e-05		0.6	0	0	0	0	0	0	0	0		-1e-05	-9e-05	-0.0001	-5e-05	-7e-05	8e-05	-2e-05	-4e-05		1e-10	8.1e-09	1e-08	2.5e-09	4.9e-09	6.4e-09	4e-10	1.6e-09
0.8	-0.00016	-4e-05	5e-05	-5e-05	-0.00012	8e-05	-2e-05	6e-05		0.8	0	0	0	0	0	0	0	0		-0.00016	-4e-05	5e-05	-5e-05	-0.00012	8e-05	-2e-05	6e-05		2.56e-08	1.6e-09	2.5e-09	2.5e-09	1.44e-08	6.4e-09	4e-10	3.6e-09
1	4e-05	1e-05	0.00015	-0.00015	-0.00017	0.00018	-7e-05	1e-05		1	0	0	0	0	0	0	0	0		4e-05	1e-05	0.00015	-0.00015	-0.00017	0.00018	-7e-05	1e-05		1.6e-09	1e-10	2.25e-08	2.25e-08	2.89e-08	3.24e-08	4.9e-09	1e-10
1.2	-6e-05	0.00011	-0.0001	0.0002	0.00013	8e-05	-2e-05	-4e-05		1.2	0	0	0	0	0	0	0	0		-6e-05	0.00011	-0.0001	0.0002	0.00013	8e-05	-2e-05	-4e-05		3.6e-09	1.21e-08	1e-08	4e-08	1.69e-08	6.4e-09	4e-10	1.6e-09
1.4	0.00039	-9e-05	0.00015	0	0.00013	0.00033	-7e-05	-4e-05		1.4	0	0	0	0	0	0	0	0		0.00039	-9e-05	0.00015	0	0.00013	0.00033	-7e-05	-4e-05		1.521e-07	8.1e-09	2.25e-08	0	1.69e-08	1.089e-07	4.9e-09	1.6e-09
1.6	-6e-05	1e-05	5e-05	-5e-05	8e-05	3e-05	-2e-05	-4e-05		1.6	0	0	0	0	0	0	0	0		-6e-05	1e-05	5e-05	-5e-05	8e-05	3e-05	-2e-05	-4e-05		3.6e-09	1e-10	2.5e-09	2.5e-09	6.4e-09	9e-10	4e-10	1.6e-09
1.8	-0.00016	1e-05	0.0001	-5e-05	-2e-05	-2e-05	3e-05	-4e-05		1.8	0	0	0	0	0	0	0	0		-0.00016	1e-05	0.0001	-5e-05	-2e-05	-2e-05	3e-05	-4e-05		2.56e-08	1e-10	1e-08	2.5e-09	4e-10	4e-10	9e-10	1.6e-09
2	9e-05	0.00011	0	-0.00015	-2e-05	-7e-05	3e-05	1e-05		2	0	0	0	0	0	0	0	0		9e-05	0.00011	0	-0.00015	-2e-05	-7e-05	3e-05	1e-05		8.1e-09	1.21e-08	0	2.25e-08	4e-10	4.9e-09	9e-10	1e-10
2.2	-1e-05	-0.00014	0	0.00015	8e-05	-0.00017	3e-05	6e-05		2.2	0	0	0	0	0	0	0	0		-1e-05	-0.00014	0	0.00015	8e-05	-0.00017	3e-05	6e-05		1e-10	1.96e-08	0	2.25e-08	6.4e-09	2.89e-08	9e-10	3.6e-09
2.4	9e-05	1e-05	-0.00015	0	-2e-05	-7e-05	8e-05	6e-05		2.4	0	0	0	0	0	0	0	0		9e-05	1e-05	-0.00015	0	-2e-05	-7e-05	8e-05	6e-05		8.1e-09	1e-10	2.25e-08	0	4e-10	4.9e-09	6.4e-09	3.6e-09
2.6	-6e-05	1e-05	5e-05	0	-7e-05	-0.00022	8e-05	0.00011		2.6	0	0	0	0	0	0	0	0		-6e-05	1e-05	5e-05	0	-7e-05	-0.00022	8e-05	0.00011		3.6e-09	1e-10	2.5e-09	0	4.9e-09	4.84e-08	6.4e-09	1.21e-08
2.8	-0.00016	0.00011	-0.0001	-5e-05	-0.00012	-0.00012	0.00013	0.00011		2.8	0	0	0	0	0	0	0	0		-0.00016	0.00011	-0.0001	-5e-05	-0.00012	-0.00012	0.00013	0.00011		2.56e-08	1.21e-08	1e-08	2.5e-09	1.44e-08	1.44e-08	1.69e-08	1.21e-08
3	4e-05	-9e-05	0	-0.00015	-0.00012	-0.00017	0.00013	0.00011		3	0	0	0	0	0	0	0	0		4e-05	-9e-05	0	-0.00015	-0.00012	-0.00017	0.00013	0.00011		1.6e-09	8.1e-09	0	2.25e-08	1.44e-08	2.89e-08	1.69e-08	1.21e-08
3.2	-1e-05	-4e-05	-0.0001	0.00015	0.00023	-7e-05	0.00028	0.00011		3.2	0	0	0	0	0	0	0	0		-1e-05	-4e-05	-0.0001	0.00015	0.00023	-7e-05	0.00028	0.00011		1e-10	1.6e-09	1e-08	2.25e-08	5.29e-08	4.9e-09	7.84e-08	1.21e-08
3.4	-0.00011	-4e-05	0.0001	0	0.00013	-0.00017	3e-05	0.00036		3.4	0	0	0	0	0	0	0	0		-0.00011	-4e-05	0.0001	0	0.00013	-0.00017	3e-05	0.00036		1.21e-08	1.6e-09	1e-08	0	1.69e-08	2.89e-08	9e-10	1.296e-07
3.6	-6e-05	0.00011	0.0001	0	-2e-05	-7e-05	-0.00012	0.00011		3.6	0	0	0	0	0	0	0	0		-6e-05	0.00011	0.0001	0	-2e-05	-7e-05	-0.00012	0.00011		3.6e-09	1.21e-08	1e-08	0	4e-10	4.9e-09	1.44e-08	1.21e-08
3.8	-0.00011	-9e-05	0	-0.0001	-2e-05	-0.00017	-0.00012	1e-05		3.8	0	0	0	0	0	0	0	0		-0.00011	-9e-05	0	-0.0001	-2e-05	-0.00017	-0.00012	1e-05		1.21e-08	8.1e-09	0	1e-08	4e-10	2.89e-08	1.44e-08	1e-10
4	9e-05	6e-05	0.0003	-0.0002	-2e-05	-7e-05	-0.00022	-9e-05		4	0	0	0	0	0	0	0	0		9e-05	6e-05	0.0003	-0.0002	-2e-05	-7e-05	-0.00022	-9e-05		8.1e-09	3.6e-09	9e-08	4e-08	4e-10	4.9e-09	4.84e-08	8.1e-09
4.2	-6e-05	1e-05	-5e-05	0.0001	3e-05	-0.00017	-0.00012	-0.00014		4.2	0	0	0	0	0	0	0	0		-6e-05	1e-05	-5e-05	0.0001	3e-05	-0.00017	-0.00012	-0.00014		3.6e-09	1e-10	2.5e-09	1e-08	9e-10	2.89e-08	1.44e-08	1.96e-08
4.4	-0.00016	0.00011	0.00015	0	-2e-05	3e-05	-0.00012	-0.00014		4.4	0	0	0	0	0	0	0	0		-0.00016	0.00011	0.00015	0	-2e-05	3e-05	-0.00012	-0.00014		2.56e-08	1.21e-08	2.25e-08	0	4e-10	9e-10	1.44e-08	1.96e-08
4.6	-6e-05	-0.00014	-5e-05	-0.0001	-7e-05	-0.00012	-7e-05	-0.00014		4.6	0	0	0	0	0	0	0	0		-6e-05	-0.00014	-5e-05	-0.0001	-7e-05	-0.00012	-7e-05	-0.00014		3.6e-09	1.96e-08	2.5e-09	1e-08	4.9e-09	1.44e-08	4.9e-09	1.96e-08
4.8	-0.00011	1e-05	0.0001	-0.0001	-0.00017	3e-05	-0.00012	-0.00014		4.8	0	0	0	0	0	0	0	0		-0.00011	1e-05	0.0001	-0.0001	-0.00017	3e-05	-0.00012	-0.00014		1.21e-08	1e-10	1e-08	1e-08	2.89e-08	9e-10	1.44e-08	1.96e-08
5	9e-05	1e-05	-0.0001	-0.0002	-7e-05	-7e-05	-0.00012	-0.00014		5	0	0	0	0	0	0	0	0		9e-05	1e-05	-0.0001	-0.0002	-7e-05	-7e-05	-0.00012	-0.00014		8.1e-09	1e-10	1e-08	4e-08	4.9e-09	4.9e-09	1.44e-08	1.96e-08
5.2	-1e-05	0.00016	5e-05	0.0001	0.00013	3e-05	-7e-05	-9e-05		5.2	0	0	0	0	0	0	0	0		-1e-05	0.00016	5e-05	0.0001	0.00013	3e-05	-7e-05	-9e-05		1e-10	2.56e-08	2.5e-09	1e-08	1.69e-08	9e-10	4.9e-09	8.1e-09
5.4	-0.00021	-0.00014	-0.0001	-5e-05	0.00013	-7e-05	-2e-05	-9e-05		5.4	0	0	0	0	0	0	0	0		-0.00021	-0.00014	-0.0001	-5e-05	0.00013	-7e-05	-2e-05	-9e-05		4.41e-08	1.96e-08	1e-08	2.5e-09	1.69e-08	4.9e-09	4e-10	8.1e-09
5.6	-1e-05	1e-05	0	0	3e-05	8e-05	-2e-05	-4e-05		5.6	0	0	0	0	0	0	0	0		-1e-05	1e-05	0	0	3e-05	8e-05	-2e-05	-4e-05		1e-10	1e-10	0	0	9e-10	6.4e-09	4e-10	1.6e-09
5.8	-6e-05	1e-05	-0.00015	-0.0001	-2e-05	-2e-05	3e-05	-4e-05		5.8	0	0	0	0	0	0	0	0		-6e-05	1e-05	-0.00015	-0.0001	-2e-05	-2e-05	3e-05	-4e-05		3.6e-09	1e-10	2.25e-08	1e-08	4e-10	4e-10	9e-10	1.6e-09
6	9e-05	0.00011	5e-05	-0.00015	-2e-05	0.00028	-2e-05	1e-05		6	0	0	0	0	0	0	0	0		9e-05	0.00011	5e-05	-0.00015	-2e-05	0.00028	-2e-05	1e-05		8.1e-09	1.21e-08	2.5e-09	2.25e-08	4e-10	7.84e-08	4e-10	1e-10
6.2	4e-05	-9e-05	5e-05	5e-05	3e-05	-7e-05	-7e-05	-4e-05		6.2	0	0	0	0	0	0	0	0		4e-05	-9e-05	5e-05	5e-05	3e-05	-7e-05	-7e-05	-4e-05		1.6e-09	8.1e-09	2.5e-09	2.5e-09	9e-10	4.9e-09	4.9e-09	1.6e-09
6.4	-0.00016	1e-05	0.0001	-5e-05	-7e-05	-2e-05	3e-05	-9e-05		6.4	0	0	0	0	0	0	0	0		-0.00016	1e-05	0.0001	-5e-05	-7e-05	-2e-05	3e-05	-9e-05		2.56e-08	1e-10	1e-08	2.5e-09	4.9e-09	4e-10	9e-10	8.1e-09
6.6	4e-05	1e-05	0.00035	0	-7e-05	-7e-05	-7e-05	6e-05		6.6	0	0	0	0	0	0	0	0		4e-05	1e-05	0.00035	0	-7e-05	-7e-05	-7e-05	6e-05		1.6e-09	1e-10	1.225e-07	0	4.9e-09	4.9e-09	4.9e-09	3.6e-09
6.8	-0.00011	0.00011	0	-0.0001	-0.00012	-0.00022	-7e-05	-4e-05		6.8	0	0	0	0	0	0	0	0		-0.00011	0.00011	0	-0.0001	-0.00012	-0.00022	-7e-05	-4e-05		1.21e-08	1.21e-08	0	1e-08	1.44e-08	4.84e-08	4.9e-09	1.6e-09
7	9e-05	-9e-05	0.00015	-5e-05	-2e-05	-0.00017	-7e-05	-4e-05		7	0	0	0	0	0	0	0	0		9e-05	-9e-05	0.00015	-5e-05	-2e-05	-0.00017	-7e-05	-4e-05		8.1e-09	8.1e-09	2.25e-08	2.5e-09	4e-10	2.89e-08	4.9e-09	1.6e-09
7.2	-6e-05	1e-05	0	5e-05	0.00013	-0.00022	-7e-05	1e-05		7.2	0	0	0	0	0	0	0	0		-6e-05	1e-05	0	5e-05	0.00013	-0.00022	-7e-05	1e-05		3.6e-09	1e-10	0	2.5e-09	1.69e-08	4.84e-08	4.9e-09	1e-10
7.4	-0.00016	1e-05	5e-05	-5e-05	8e-05	-0.00012	-2e-05	-4e-05		7.4	0	0	0	0	0	0	0	0		-0.00016	1e-05	5e-05	-5e-05	8e-05	-0.00012	-2e-05	-4e-05		2.56e-08	1e-10	2.5e-09	2.5e-09	6.4e-09	1.44e-08	4e-10	1.6e-09
7.6	-1e-05	0.00016	-0.0001	0	3e-05	-0.00022	-2e-05	1e-05		7.6	0	0	0	0	0	0	0	0		-1e-05	0.00016	-0.0001	0	3e-05	-0.00022	-2e-05	1e-05		1e-10	2.56e-08	1e-08	0	9e-10	4.84e-08	4e-10	1e-10
7.8	-0.00011	-9e-05	5e-05	-0.00015	-2e-05	-7e-05	-2e-05	1e-05		7.8	0	0	0	0	0	0	0	0		-0.00011	-9e-05	5e-05	-0.00015	-2e-05	-7e-05	-2e-05	1e-05		1.21e-08	8.1e-09	2.5e-09	2.25e-08	4e-10	4.9e-09	4e-10	1e-10
8	0.00029	1e-05	-0.00015	0.00015	3e-05	-0.00022	-2e-05	1e-05		8	0	0	0	0	0	0	0	0		0.00029	1e-05	-0.00015	0.00015	3e-05	-0.00022	-2e-05	1e-05		8.41e-08	1e-10	2.25e-08	2.25e-08	9e-10	4.84e-08	4e-10	1e-10
8.2	-0.00011	1e-05	0	0.0001	-2e-05	-7e-05	3e-05	1e-05		8.2	0	0	0	0	0	0	0	0		-0.00011	1e-05	0	0.0001	-2e-05	-7e-05	3e-05	1e-05		1.21e-08	1e-10	0	1e-08	4e-10	4.9e-09	9e-10	1e-10
8.4	-0.00016	0.00021	-0.0002	-5e-05	-2e-05	-0.00022	3e-05	6e-05		8.4	0	0	0	0	0	0	0	0		-0.00016	0.00021	-0.0002	-5e-05	-2e-05	-0.00022	3e-05	6e-05		2.56e-08	4.41e-08	4e-08	2.5e-09	4e-10	4.84e-08	9e-10	3.6e-09
8.6	-1e-05	-0.00014	5e-05	-5e-05	-0.00012	3e-05	8e-05	0.00011		8.6	0	0	0	0	0	0	0	0		-1e-05	-0.00014	5e-05	-5e-05	-0.00012	3e-05	8e-05	0.00011		1e-10	1.96e-08	2.5e-09	2.5e-09	1.44e-08	9e-10	6.4e-09	1.21e-08
8.8	-6e-05	-4e-05	-5e-05	-0.00015	-0.00017	-0.00017	8e-05	6e-05		8.8	0	0	0	0	0	0	0	0		-6e-05	-4e-05	-5e-05	-0.00015	-0.00017	-0.00017	8e-05	6e-05		3.6e-09	1.6e-09	2.5e-09	2.25e-08	2.89e-08	2.89e-08	6.4e-09	3.6e-09
9	4e-05	1e-05	5e-05	0.00025	3e-05	-2e-05	0.00028	0.00011		9	0	0	0	0	0	0	0	0		4e-05	1e-05	5e-05	0.00025	3e-05	-2e-05	0.00028	0.00011		1.6e-09	1e-10	2.5e-09	6.25e-08	9e-10	4e-10	7.84e-08	1.21e-08
9.2	-0.00011	0.00031	0.00035	5e-05	8e-05	-0.00012	3e-05	0.00016		9.2	0	0	0	0	0	0	0	0		-0.00011	0.00031	0.00035	5e-05	8e-05	-0.00012	3e-05	0.00016		1.21e-08	9.61e-08	1.225e-07	2.5e-09	6.4e-09	1.44e-08	9e-10	2.56e-08
9.4	-0.00016	-0.00014	-5e-05	-5e-05	3e-05	-2e-05	-7e-05	0.00016		9.4	0	0	0	0	0	0	0	0		-0.00016	-0.00014	-5e-05	-5e-05	3e-05	-2e-05	-7e-05	0.00016		2.56e-08	1.96e-08	2.5e-09	2.5e-09	9e-10	4e-10	4.9e-09	2.56e-08
9.6	4e-05	-0.00024	0.0001	-5e-05	-2e-05	-0.00012	-0.00017	6e-05		9.6	0	0	0	0	0	0	0	0		4e-05	-0.00024	0.0001	-5e-05	-2e-05	-0.00012	-0.00017	6e-05		1.6e-09	5.76e-08	1e-08	2.5e-09	4e-10	1.44e-08	2.89e-08	3.6e-09
9.8	-1e-05	1e-05	-5e-05	-0.00015	-7e-05	8e-05	-0.00012	-0.00014		9.8	0	0	0	0	0	0	0	0		-1e-05	1e-05	-5e-05	-0.00015	-7e-05	8e-05	-0.00012	-0.00014		1e-10	1e-10	2.5e-09	2.25e-08	4.9e-09	6.4e-09	1.44e-08	1.96e-08
10	-0.00011	0.00041	0	0.0001	3e-05	-7e-05	-0.00017	-0.00019		10	0	0	0	0	0	0	0	0		-0.00011	0.00041	0	0.0001	3e-05	-7e-05	-0.00017	-0.00019		1.21e-08	1.681e-07	0	1e-08	9e-10	4.9e-09	2.89e-08	3.61e-08
10.2	-0.00011	-4e-05	-0.0001	-5e-05	-2e-05	0.00023	-0.00017	-0.00019		10.2	0	0	0	0	0	0	0	0		-0.00011	-4e-05	-0.0001	-5e-05	-2e-05	0.00023	-0.00017	-0.00019		1.21e-08	1.6e-09	1e-08	2.5e-09	4e-10	5.29e-08	2.89e-08	3.61e-08
10.4	-0.00016	-0.00024	5e-05	-5e-05	-2e-05	-0.00012	-0.00017	-0.00014		10.4	0	0	0	0	0	0	0	0		-0.00016	-0.00024	5e-05	-5e-05	-2e-05	-0.00012	-0.00017	-0.00014		2.56e-08	5.76e-08	2.5e-09	2.5e-09	4e-10	1.44e-08	2.89e-08	1.96e-08
10.6	4e-05	1e-05	-0.00015	-5e-05	-0.00012	-0.00012	-0.00012	-0.00019		10.6	0	0	0	0	0	0	0	0		4e-05	1e-05	-0.00015	-5e-05	-0.00012	-0.00012	-0.00012	-0.00019		1.6e-09	1e-10	2.25e-08	2.5e-09	1.44e-08	1.44e-08	1.44e-08	3.61e-08
10.8	-6e-05	0.00066	-5e-05	-0.0002	-0.00017	-0.00017	-0.00012	-0.00014		10.8	0	0	0	0	0	0	0	0		-6e-05	0.00066	-5e-05	-0.0002	-0.00017	-0.00017	-0.00012	-0.00014		3.6e-09	4.356e-07	2.5e-09	4e-08	2.89e-08	2.89e-08	1.44e-08	1.96e-08
11	-0.00016	0.01081	-0.00015	0.0001	0.00013	-0.00027	-7e-05	-0.00014		11	0	0	0	0	0	0	0	0		-0.00016	0.01081	-0.00015	0.0001	0.00013	-0.00027	-7e-05	-0.00014		2.56e-08	0.000116856	2.25e-08	1e-08	1.69e-08	7.29e-08	4.9e-09	1.96e-08
11.2	0.00204	0.01051	5e-05	0	8e-05	-0.00012	-7e-05	-9e-05		11.2	0	0	0	0	0	0	0	0		0.00204	0.01051	5e-05	0	8e-05	-0.00012	-7e-05	-9e-05		4.1616e-06	0.00011046	2.5e-09	0	6.4e-09	1.44e-08	4.9e-09	8.1e-09
11.4	0.00929	0.01211	0.00365	0	3e-05	-0.00032	-7e-05	-9e-05		11.4	0	0.0038	0	0	0	0	0	0		0.00929	0.00831	0.00365	0	3e-05	-0.00032	-7e-05	-9e-05		8.63041e-05	6.90561e-05	1.33225e-05	0	9e-10	1.024e-07	4.9e-09	8.1e-09
11.6	0.01154	0.01786	0.01275	-0.0001	3e-05	-0.00017	-2e-05	-4e-05		11.6	0	0.0322	0	0	0	0	0	0		0.01154	-0.01434	0.01275	-0.0001	3e-05	-0.00017	-2e-05	-4e-05		0.000133172	0.000205636	0.000162562	1e-08	9e-10	2.89e-08	4e-10	1.6e-09
11.8	0.01224	0.02656	0.01795	-0.0002	-0.00012	-0.00027	-2e-05	-4e-05		11.8	0.035	0.0706	0	0	0	0	0	0		-0.02276	-0.04404	0.01795	-0.0002	-0.00012	-0.00027	-2e-05	-4e-05		0.000518018	0.00193952	0.000322203	4e-08	1.44e-08	7.29e-08	4e-10	1.6e-09
12	0.01389	0.03236	0.0167	0.0028	-0.00012	-0.00017	-0.00017	-4e-05		12	0.0545	0.0708	0.0386	0	0	0	0	0		-0.04061	-0.03844	-0.0219	0.0028	-0.00012	-0.00017	-0.00017	-4e-05		0.00164917	0.00147763	0.00047961	7.84e-06	1.44e-08	2.89e-08	2.89e-08	1.6e-09
12.2	0.01684	0.03216	0.01835	0.00595	-7e-05	-0.00022	-2e-05	-0.00019		12.2	0.0531	0.0672	0.028	0	0	0	0	0		-0.03626	-0.03504	-0.00965	0.00595	-7e-05	-0.00022	-2e-05	-0.00019		0.00131479	0.0012278	9.31225e-05	3.54025e-05	4.9e-09	4.84e-08	4e-10	3.61e-08
12.4	0.01794	0.03646	0.0221	0.00635	0.00508	0.00563	-7e-05	1e-05		12.4	0.0507	0.0689	0.0522	0	0	0	0	0		-0.03276	-0.03244	-0.0301	0.00635	0.00508	0.00563	-7e-05	1e-05		0.00107322	0.00105235	0.00090601	4.03225e-05	2.58064e-05	3.16969e-05	4.9e-09	1e-10
12.6	0.01994	0.03596	0.0244	0.0134	0.00718	0.01163	-7e-05	1e-05		12.6	0.052	0.0741	0.0475	0.0151	0	0	0	0		-0.03206	-0.03814	-0.0231	-0.0017	0.00718	0.01163	-7e-05	1e-05		0.00102784	0.00145466	0.00053361	2.89e-06	5.15524e-05	0.000135257	4.9e-09	1e-10
12.8	0.02579	0.04336	0.0287	0.01565	0.00888	0.01123	-7e-05	-4e-05		12.8	0.0612	0.0781	0.0432	0.0192	0	0.0137	0	0		-0.03541	-0.03474	-0.0145	-0.00355	0.00888	-0.00247	-7e-05	-4e-05		0.00125387	0.00120687	0.00021025	1.26025e-05	7.88544e-05	6.1009e-06	4.9e-09	1.6e-09
13	0.03714	0.05026	0.03785	0.01655	0.00933	0.02568	0.00263	-4e-05		13	0.0603	0.0792	0.0753	0.0175	0.0151	0.0102	0	0		-0.02316	-0.02894	-0.03745	-0.00095	-0.00577	0.01548	0.00263	-4e-05		0.000536386	0.000837524	0.0014025	9.025e-07	3.32929e-05	0.00023963	6.9169e-06	1.6e-09
13.2	0.04459	0.05761	0.0466	0.01715	0.00873	0.03688	0.00498	-4e-05		13.2	0.0587	0.0777	0.0724	0.0403	0.0107	0.0268	0	0		-0.01411	-0.02009	-0.0258	-0.02315	-0.00197	0.01008	0.00498	-4e-05		0.000199092	0.000403608	0.00066564	0.000535923	3.8809e-06	0.000101606	2.48004e-05	1.6e-09
13.4	0.04989	0.06971	0.0498	0.02405	0.01243	0.03593	0.00293	-4e-05		13.4	0.0645	0.08	0.0693	0.0311	0.0112	0.0278	0.0078	0		-0.01461	-0.01029	-0.0195	-0.00705	0.00123	0.00813	-0.00487	-4e-05		0.000213452	0.000105884	0.00038025	4.97025e-05	1.5129e-06	6.60969e-05	2.37169e-05	1.6e-09
13.6	0.06959	0.07761	0.0514	0.02615	0.01448	0.03508	0.00383	0.00116		13.6	0.064	0.0832	0.0679	0.0248	0.0116	0.0345	0.0049	0		0.00559	-0.00559	-0.0165	0.00135	0.00288	0.00058	-0.00107	0.00116		3.12481e-05	3.12481e-05	0.00027225	1.8225e-06	8.2944e-06	3.364e-07	1.1449e-06	1.3456e-06
13.8	0.07604	0.09786	0.0611	0.0335	0.01423	0.03808	0.00793	0.00371		13.8	0.0713	0.0853	0.0666	0.0328	0.0114	0.0328	0.0071	0		0.00474	0.01256	-0.0055	0.0007	0.00283	0.00528	0.00083	0.00371		2.24676e-05	0.000157754	3.025e-05	4.9e-07	8.0089e-06	2.78784e-05	6.889e-07	1.37641e-05
14	0.07349	0.09986	0.0654	0.03585	0.01748	0.04083	0.01478	0.00296		14	0.0711	0.0859	0.0708	0.0313	0.0309	0.0315	0.0199	0		0.00239	0.01396	-0.0054	0.00455	-0.01342	0.00933	-0.00512	0.00296		5.7121e-06	0.000194882	2.916e-05	2.07025e-05	0.000180096	8.70489e-05	2.62144e-05	8.7616e-06
14.2	0.07234	0.09626	0.0739	0.0494	0.01353	0.03683	0.01713	0.00521		14.2	0.0715	0.0859	0.0744	0.0395	0.0318	0.0332	0.02	0		0.00084	0.01036	-0.0005	0.0099	-0.01827	0.00363	-0.00287	0.00521		7.056e-07	0.00010733	2.5e-07	9.801e-05	0.000333793	1.31769e-05	8.2369e-06	2.71441e-05
14.4	0.07174	0.07411	0.0755	0.05075	0.01613	0.03723	0.01978	0.01086		14.4	0.072	0.0853	0.0746	0.0426	0.0297	0.0368	0.03	0.0129		-0.00026	-0.01119	0.0009	0.00815	-0.01357	0.00043	-0.01022	-0.00204		6.76e-08	0.000125216	8.1e-07	6.64225e-05	0.000184145	1.849e-07	0.000104448	4.1616e-06
14.6	0.06834	0.06826	0.077	0.0545	0.02118	0.03538	0.02338	0.01176		14.6	0.0708	0.0853	0.0746	0.0447	0.0307	0.0344	0.025	0.0197		-0.00246	-0.01704	0.0024	0.0098	-0.00952	0.00098	-0.00162	-0.00794		6.0516e-06	0.000290362	5.76e-06	9.604e-05	9.06304e-05	9.604e-07	2.6244e-06	6.30436e-05
14.8	0.06979	0.06686	0.071	0.05585	0.02933	0.04408	0.01983	0.00971		14.8	0.0704	0.0852	0.0745	0.0516	0.0303	0.0363	0.0271	0.0146		-0.00061	-0.01834	-0.0035	0.00425	-0.00097	0.00778	-0.00727	-0.00489		3.721e-07	0.000336356	1.225e-05	1.80625e-05	9.409e-07	6.05284e-05	5.28529e-05	2.39121e-05
15	0.06729	0.05431	0.0706	0.05295	0.02458	0.04708	0.02123	0.00966		15	0.071	0.0865	0.0756	0.0462	0.0313	0.0363	0.0301	0.0137		-0.00371	-0.03219	-0.005	0.00675	-0.00672	0.01078	-0.00887	-0.00404		1.37641e-05	0.0010362	2.5e-05	4.55625e-05	4.51584e-05	0.000116208	7.86769e-05	1.63216e-05
15.2	0.05639	0.06126	0.0714	0.05065	0.02568	0.04873	0.02823	0.01201		15.2	0.0707	0.087	0.0752	0.0437	0.032	0.039	0.0318	0.0161		-0.01431	-0.02574	-0.0038	0.00695	-0.00632	0.00973	-0.00357	-0.00409		0.000204776	0.000662548	1.444e-05	4.83025e-05	3.99424e-05	9.46729e-05	1.27449e-05	1.67281e-05
15.4	0.05179	0.05901	0.07695	0.0519	0.02878	0.04558	0.02578	0.01696		15.4	0.0727	0.0885	0.073	0.0463	0.0337	0.0398	0.0313	0.0197		-0.02091	-0.02949	0.00395	0.0056	-0.00492	0.00578	-0.00552	-0.00274		0.000437228	0.00086966	1.56025e-05	3.136e-05	2.42064e-05	3.34084e-05	3.04704e-05	7.5076e-06
15.6	0.04294	0.05846	0.07595	0.06815	0.03343	0.04438	0.02938	0.01666		15.6	0.0735	0.0897	0.0721	0.046	0.0344	0.04	0.0317	0.0223		-0.03056	-0.03124	0.00385	0.02215	-0.00097	0.00438	-0.00232	-0.00564		0.000933914	0.000975938	1.48225e-05	0.000490623	9.409e-07	1.91844e-05	5.3824e-06	3.18096e-05
15.8	0.05719	0.06526	0.0763	0.06585	0.03823	0.04713	0.02868	0.01861		15.8	0.0754	0.0889	0.0726	0.0473	0.0345	0.043	0.0341	0.0177		-0.01821	-0.02364	0.0037	0.01855	0.00373	0.00413	-0.00542	0.00091		0.000331604	0.00055885	1.369e-05	0.000344103	1.39129e-05	1.70569e-05	2.93764e-05	8.281e-07
16	0.05904	0.06071	0.0817	0.0582	0.03218	0.05343	0.03658	0.01636		16	0.0742	0.09	0.0754	0.0509	0.0349	0.0455	0.0375	0.0168		-0.01516	-0.02929	0.0063	0.0073	-0.00272	0.00793	-0.00092	-0.00044		0.000229826	0.000857904	3.969e-05	5.329e-05	7.3984e-06	6.28849e-05	8.464e-07	1.936e-07
16.2	0.06914	0.06146	0.0814	0.06375	0.02833	0.05068	0.03503	0.02056		16.2	0.0744	0.0909	0.0774	0.0525	0.0342	0.0484	0.0387	0.018		-0.00526	-0.02944	0.004	0.01125	-0.00587	0.00228	-0.00367	0.00256		2.76676e-05	0.000866714	1.6e-05	0.000126563	3.44569e-05	5.1984e-06	1.34689e-05	6.5536e-06
16.4	0.06989	0.07661	0.0782	0.05895	0.03993	0.05153	0.03643	0.01381		16.4	0.0747	0.0903	0.079	0.0523	0.0372	0.0495	0.0415	0.0208		-0.00481	-0.01369	-0.0008	0.00665	0.00273	0.00203	-0.00507	-0.00699		2.31361e-05	0.000187416	6.4e-07	4.42225e-05	7.4529e-06	4.1209e-06	2.57049e-05	4.88601e-05
16.6	0.07379	0.06681	0.082	0.0592	0.04083	0.05138	0.03693	0.01701		16.6	0.076	0.0922	0.0783	0.0529	0.0412	0.0502	0.0425	0.0213		-0.00221	-0.02539	0.0037	0.0063	-0.00037	0.00118	-0.00557	-0.00429		4.8841e-06	0.000644652	1.369e-05	3.969e-05	1.369e-07	1.3924e-06	3.10249e-05	1.84041e-05
16.8	0.07604	0.08126	0.07955	0.06915	0.04373	0.05268	0.03763	0.02261		16.8	0.0767	0.0918	0.0775	0.0559	0.0438	0.0499	0.0447	0.0215		-0.00066	-0.01054	0.00205	0.01325	-7e-05	0.00278	-0.00707	0.00111		4.356e-07	0.000111092	4.2025e-06	0.000175563	4.9e-09	7.7284e-06	4.99849e-05	1.2321e-06
17	0.07794	0.07866	0.0755	0.06865	0.04203	0.05548	0.04463	0.02211		17	0.0774	0.0913	0.0765	0.0575	0.0461	0.0499	0.0434	0.0215		0.00054	-0.01264	-0.001	0.01115	-0.00407	0.00558	0.00123	0.00061		2.916e-07	0.00015977	1e-06	0.000124323	1.65649e-05	3.11364e-05	1.5129e-06	3.721e-07
17.2	0.07469	0.07716	0.08105	0.06565	0.03713	0.05258	0.04333	0.01911		17.2	0.0778	0.0922	0.0767	0.0575	0.0457	0.0525	0.0438	0.0211		-0.00311	-0.01504	0.00435	0.00815	-0.00857	8e-05	-0.00047	-0.00199		9.6721e-06	0.000226202	1.89225e-05	6.64225e-05	7.34449e-05	6.4e-09	2.209e-07	3.9601e-06
17.4	0.07719	0.07941	0.082	0.06695	0.04623	0.05003	0.04313	0.01546		17.4	0.0775	0.0923	0.0774	0.0593	0.0447	0.0538	0.0457	0.0214		-0.00031	-0.01289	0.0046	0.00765	0.00153	-0.00377	-0.00257	-0.00594		9.61e-08	0.000166152	2.116e-05	5.85225e-05	2.3409e-06	1.42129e-05	6.6049e-06	3.52836e-05
17.6	0.07644	0.08206	0.08045	0.06735	0.04683	0.05058	0.04453	0.02236		17.6	0.0767	0.0917	0.0793	0.0578	0.0444	0.0532	0.0468	0.0204		-0.00026	-0.00964	0.00115	0.00955	0.00243	-0.00262	-0.00227	0.00196		6.76e-08	9.29296e-05	1.3225e-06	9.12025e-05	5.9049e-06	6.8644e-06	5.1529e-06	3.8416e-06
17.8	0.07539	0.08211	0.07425	0.06775	0.04773	0.05263	0.04663	0.02091		17.8	0.0772	0.0911	0.0795	0.0554	0.0447	0.0519	0.0474	0.0214		-0.00181	-0.00899	-0.00525	0.01235	0.00303	0.00073	-0.00077	-0.00049		3.2761e-06	8.08201e-05	2.75625e-05	0.000152523	9.1809e-06	5.329e-07	5.929e-07	2.401e-07
18	0.07459	0.07896	0.0725	0.0722	0.04173	0.05813	0.04513	0.01526		18	0.0762	0.0904	0.0789	0.0548	0.0464	0.05	0.0467	0.0254		-0.00161	-0.01144	-0.0064	0.0174	-0.00467	0.00813	-0.00157	-0.01014		2.5921e-06	0.000130874	4.096e-05	0.00030276	2.18089e-05	6.60969e-05	2.4649e-06	0.00010282
18.2	0.07589	0.07516	0.0737	0.06995	0.04483	0.06038	0.04253	0.01886		18.2	0.077	0.0895	0.0782	0.055	0.05	0.0488	0.0457	0.0229		-0.00111	-0.01434	-0.0045	0.01495	-0.00517	0.01158	-0.00317	-0.00404		1.2321e-06	0.000205636	2.025e-05	0.000223502	2.67289e-05	0.000134096	1.00489e-05	1.63216e-05
18.4	0.07639	0.07616	0.07315	0.06665	0.04868	0.05143	0.04403	0.01781		18.4	0.0766	0.0891	0.0767	0.0574	0.0518	0.0492	0.0464	0.0219		-0.00021	-0.01294	-0.00355	0.00925	-0.00312	0.00223	-0.00237	-0.00409		4.41e-08	0.000167444	1.26025e-05	8.55625e-05	9.7344e-06	4.9729e-06	5.6169e-06	1.67281e-05
18.6	0.07719	0.07821	0.0766	0.0661	0.04678	0.05363	0.05088	0.01821		18.6	0.0765	0.0887	0.076	0.0611	0.0505	0.0505	0.0472	0.0223		0.00069	-0.01049	0.0006	0.005	-0.00372	0.00313	0.00368	-0.00409		4.761e-07	0.00011004	3.6e-07	2.5e-05	1.38384e-05	9.7969e-06	1.35424e-05	1.67281e-05
18.8	0.07559	0.07751	0.07355	0.0696	0.04058	0.05628	0.04728	0.02026		18.8	0.0753	0.0883	0.0759	0.0622	0.0476	0.0529	0.048	0.0224		0.00029	-0.01079	-0.00235	0.0074	-0.00702	0.00338	-0.00072	-0.00214		8.41e-08	0.000116424	5.5225e-06	5.476e-05	4.92804e-05	1.14244e-05	5.184e-07	4.5796e-06
19	0.07604	0.07886	0.075	0.066	0.04123	0.05663	0.04368	0.01861		19	0.0746	0.0876	0.0763	0.0609	0.0456	0.0535	0.0484	0.0236		0.00144	-0.00874	-0.0013	0.0051	-0.00437	0.00313	-0.00472	-0.00499		2.0736e-06	7.63876e-05	1.69e-06	2.601e-05	1.90969e-05	9.7969e-06	2.22784e-05	2.49001e-05
19.2	0.07449	0.07701	0.07315	0.0656	0.04068	0.05543	0.04853	0.01326		19.2	0.0742	0.0864	0.0762	0.0591	0.0447	0.0529	0.0478	0.0215		0.00029	-0.00939	-0.00305	0.0065	-0.00402	0.00253	0.00073	-0.00824		8.41e-08	8.81721e-05	9.3025e-06	4.225e-05	1.61604e-05	6.4009e-06	5.329e-07	6.78976e-05
19.4	0.07524	0.08196	0.06975	0.06485	0.04548	0.04843	0.04173	0.01371		19.4	0.0726	0.0849	0.076	0.057	0.0451	0.0504	0.0475	0.021		0.00264	-0.00294	-0.00625	0.00785	0.00038	-0.00197	-0.00577	-0.00729		6.9696e-06	8.6436e-06	3.90625e-05	6.16225e-05	1.444e-07	3.8809e-06	3.32929e-05	5.31441e-05
19.6	0.07454	0.08271	0.0712	0.07045	0.04978	0.04818	0.04498	0.01971		19.6	0.0721	0.0841	0.0751	0.0554	0.0466	0.0482	0.0468	0.0222		0.00244	-0.00139	-0.0039	0.01505	0.00318	-2e-05	-0.00182	-0.00249		5.9536e-06	1.9321e-06	1.521e-05	0.000226503	1.01124e-05	4e-10	3.3124e-06	6.2001e-06
19.8	0.07154	0.07421	0.07345	0.0698	0.04628	0.05408	0.04433	0.02181		19.8	0.0725	0.0825	0.0737	0.0552	0.0487	0.0473	0.0465	0.0234		-0.00096	-0.00829	-0.00025	0.0146	-0.00242	0.00678	-0.00217	-0.00159		9.216e-07	6.87241e-05	6.25e-08	0.00021316	5.8564e-06	4.59684e-05	4.7089e-06	2.5281e-06
20	0.07534	0.07441	0.0734	0.0655	0.04163	0.05608	0.04308	0.01561		20	0.072	0.0808	0.073	0.0563	0.0491	0.0478	0.0455	0.0248		0.00334	-0.00639	0.0004	0.0092	-0.00747	0.00828	-0.00242	-0.00919		1.11556e-05	4.08321e-05	1.6e-07	8.464e-05	5.58009e-05	6.85584e-05	5.8564e-06	8.44561e-05
20.2	0.07239	0.07361	0.0747	0.0646	0.04013	0.05683	0.04483	0.01146		20.2	0.0712	0.0805	0.0724	0.057	0.0473	0.0503	0.0447	0.021		0.00119	-0.00689	0.0023	0.0076	-0.00717	0.00653	0.00013	-0.00954		1.4161e-06	4.74721e-05	5.29e-06	5.776e-05	5.14089e-05	4.26409e-05	1.69e-08	9.10116e-05
20.4	0.07379	0.06721	0.0711	0.05895	0.04153	0.05318	0.04933	0.01681		20.4	0.0707	0.0798	0.0722	0.0574	0.0451	0.0525	0.0444	0.0194		0.00309	-0.01259	-0.0011	0.00155	-0.00357	0.00068	0.00493	-0.00259		9.5481e-06	0.000158508	1.21e-06	2.4025e-06	1.27449e-05	4.624e-07	2.43049e-05	6.7081e-06
20.6	0.07119	0.07326	0.06915	0.0593	0.04378	0.05418	0.05028	0.02081		20.6	0.0704	0.0789	0.0724	0.0567	0.0444	0.0525	0.0453	0.0207		0.00079	-0.00564	-0.00325	0.0026	-0.00062	0.00168	0.00498	0.00011		6.241e-07	3.18096e-05	1.05625e-05	6.76e-06	3.844e-07	2.8224e-06	2.48004e-05	1.21e-08
20.8	0.06954	0.06861	0.067	0.06415	0.04213	0.04708	0.04323	0.02661		20.8	0.0693	0.0789	0.0721	0.056	0.0453	0.0511	0.0461	0.0224		0.00024	-0.01029	-0.0051	0.00815	-0.00317	-0.00402	-0.00287	0.00421		5.76e-08	0.000105884	2.601e-05	6.64225e-05	1.00489e-05	1.61604e-05	8.2369e-06	1.77241e-05
21	0.07104	0.06891	0.0694	0.0638	0.03858	0.04653	0.04183	0.01881		21	0.0686	0.0787	0.0716	0.0559	0.0465	0.0493	0.0463	0.0245		0.00244	-0.00979	-0.0022	0.0079	-0.00792	-0.00277	-0.00447	-0.00569		5.9536e-06	9.58441e-05	4.84e-06	6.241e-05	6.27264e-05	7.6729e-06	1.99809e-05	3.23761e-05
21.2	0.06999	0.07491	0.0691	0.0642	0.03958	0.05513	0.03598	0.01566		21.2	0.0682	0.079	0.0712	0.0558	0.0467	0.0488	0.0458	0.0212		0.00179	-0.00409	-0.0021	0.0084	-0.00712	0.00633	-0.00982	-0.00554		3.2041e-06	1.67281e-05	4.41e-06	7.056e-05	5.06944e-05	4.00689e-05	9.64324e-05	3.06916e-05
21.4	0.07214	0.07586	0.07055	0.06075	0.03943	0.05383	0.04308	0.01196		21.4	0.0685	0.0785	0.0701	0.056	0.0461	0.049	0.0455	0.0191		0.00364	-0.00264	0.00045	0.00475	-0.00667	0.00483	-0.00242	-0.00714		1.32496e-05	6.9696e-06	2.025e-07	2.25625e-05	4.44889e-05	2.33289e-05	5.8564e-06	5.09796e-05
21.6	0.06904	0.07771	0.06605	0.06015	0.04333	0.05838	0.04688	0.02446		21.6	0.0686	0.0777	0.0692	0.0565	0.0449	0.0498	0.0464	0.0208		0.00044	1e-05	-0.00315	0.00365	-0.00157	0.00858	0.00048	0.00366		1.936e-07	1e-10	9.9225e-06	1.33225e-05	2.4649e-06	7.36164e-05	2.304e-07	1.33956e-05
21.8	0.07029	0.07616	0.06255	0.0651	0.04113	0.06003	0.03923	0.02151		21.8	0.0679	0.0778	0.0692	0.056	0.0436	0.0501	0.0469	0.0207		0.00239	-0.00164	-0.00665	0.0091	-0.00247	0.00993	-0.00767	0.00081		5.7121e-06	2.6896e-06	4.42225e-05	8.281e-05	6.1009e-06	9.86049e-05	5.88289e-05	6.561e-07
22	0.07089	0.07106	0.06435	0.0636	0.04313	0.05838	0.04068	0.01936		22	0.0668	0.078	0.0685	0.0546	0.0436	0.0498	0.0456	0.0218		0.00409	-0.00694	-0.00415	0.009	-0.00047	0.00858	-0.00492	-0.00244		1.67281e-05	4.81636e-05	1.72225e-05	8.1e-05	2.209e-07	7.36164e-05	2.42064e-05	5.9536e-06
22.2	0.06834	0.07046	0.066	0.0598	0.04088	0.05353	0.04358	0.01711		22.2	0.0665	0.0773	0.0683	0.0532	0.0444	0.0488	0.044	0.0231		0.00184	-0.00684	-0.0023	0.0066	-0.00352	0.00473	-0.00042	-0.00599		3.3856e-06	4.67856e-05	5.29e-06	4.356e-05	1.23904e-05	2.23729e-05	1.764e-07	3.58801e-05
22.4	0.06949	0.06626	0.0657	0.05925	0.04278	0.05308	0.04333	0.01441		22.4	0.066	0.0764	0.0678	0.0526	0.0452	0.0479	0.0432	0.0209		0.00349	-0.01014	-0.0021	0.00665	-0.00242	0.00518	0.00013	-0.00649		1.21801e-05	0.00010282	4.41e-06	4.42225e-05	5.8564e-06	2.68324e-05	1.69e-08	4.21201e-05
22.6	0.07089	0.06746	0.06935	0.05665	0.03878	0.05078	0.04423	0.02361		22.6	0.0658	0.0755	0.0664	0.053	0.0455	0.0469	0.0434	0.0204		0.00509	-0.00804	0.00295	0.00365	-0.00672	0.00388	0.00083	0.00321		2.59081e-05	6.46416e-05	8.7025e-06	1.33225e-05	4.51584e-05	1.50544e-05	6.889e-07	1.03041e-05
22.8	0.06644	0.07401	0.0648	0.0571	0.04023	0.05058	0.04053	0.01746		22.8	0.0655	0.0746	0.0657	0.0536	0.0446	0.0464	0.0439	0.0212		0.00094	-0.00059	-0.0009	0.0035	-0.00437	0.00418	-0.00337	-0.00374		8.836e-07	3.481e-07	8.1e-07	1.225e-05	1.90969e-05	1.74724e-05	1.13569e-05	1.39876e-05
23	0.06524	0.07656	0.0654	0.05625	0.03798	0.05318	0.04303	0.01061		23	0.0648	0.0743	0.0654	0.0538	0.0431	0.0471	0.0438	0.0215		0.00044	0.00226	0	0.00245	-0.00512	0.00608	-0.00077	-0.01089		1.936e-07	5.1076e-06	0	6.0025e-06	2.62144e-05	3.69664e-05	5.929e-07	0.000118592
23.2	0.06684	0.06801	0.0666	0.05545	0.03818	0.05503	0.04333	0.01031		23.2	0.0645	0.0742	0.0653	0.0543	0.0415	0.0486	0.0435	0.0221		0.00234	-0.00619	0.0013	0.00115	-0.00332	0.00643	-0.00017	-0.01179		5.4756e-06	3.83161e-05	1.69e-06	1.3225e-06	1.10224e-05	4.13449e-05	2.89e-08	0.000139004
23.4	0.06749	0.06561	0.0653	0.05875	0.03633	0.05293	0.04268	0.02256		23.4	0.0639	0.0736	0.0652	0.0552	0.0408	0.05	0.0433	0.0203		0.00359	-0.00799	0.0001	0.00355	-0.00447	0.00293	-0.00062	0.00226		1.28881e-05	6.38401e-05	1e-08	1.26025e-05	1.99809e-05	8.5849e-06	3.844e-07	5.1076e-06
23.6	0.06504	0.07021	0.06115	0.0582	0.03853	0.05563	0.04208	0.02041		23.6	0.0637	0.0732	0.0651	0.0548	0.0409	0.0499	0.0433	0.0186		0.00134	-0.00299	-0.00395	0.0034	-0.00237	0.00573	-0.00122	0.00181		1.7956e-06	8.9401e-06	1.56025e-05	1.156e-05	5.6169e-06	3.28329e-05	1.4884e-06	3.2761e-06
23.8	0.06874	0.07411	0.06305	0.0586	0.04158	0.05278	0.04243	0.01661		23.8	0.0631	0.0729	0.0643	0.0539	0.0419	0.0488	0.0434	0.0206		0.00564	0.00121	-0.00125	0.0047	-0.00032	0.00398	-0.00097	-0.00399		3.18096e-05	1.4641e-06	1.5625e-06	2.209e-05	1.024e-07	1.58404e-05	9.409e-07	1.59201e-05
24	0.06689	0.06471	0.06545	0.05555	0.04188	0.05123	0.03843	0.00986		24	0.0625	0.0726	0.0633	0.0527	0.043	0.0475	0.0435	0.0226		0.00439	-0.00789	0.00215	0.00285	-0.00112	0.00373	-0.00507	-0.01274		1.92721e-05	6.22521e-05	4.6225e-06	8.1225e-06	1.2544e-06	1.39129e-05	2.57049e-05	0.000162308
24.2	0.06409	0.06531	0.06645	0.0547	0.03703	0.04948	0.04063	0.01856		24.2	0.0621	0.072	0.0629	0.0515	0.0438	0.0464	0.0433	0.0233		0.00199	-0.00669	0.00355	0.0032	-0.00677	0.00308	-0.00267	-0.00474		3.9601e-06	4.47561e-05	1.26025e-05	1.024e-05	4.58329e-05	9.4864e-06	7.1289e-06	2.24676e-05
24.4	0.06729	0.06831	0.06305	0.06185	0.03923	0.04773	0.04248	0.02091		24.4	0.0619	0.0708	0.0624	0.0504	0.0439	0.0462	0.0435	0.022		0.00539	-0.00249	0.00065	0.01145	-0.00467	0.00153	-0.00102	-0.00109		2.90521e-05	6.2001e-06	4.225e-07	0.000131103	2.18089e-05	2.3409e-06	1.0404e-06	1.1881e-06
24.6	0.06259	0.06556	0.06345	0.05655	0.03968	0.04873	0.04198	0.01986		24.6	0.0616	0.0704	0.0619	0.0505	0.0431	0.0468	0.044	0.0201		0.00099	-0.00484	0.00155	0.00605	-0.00342	0.00193	-0.00202	-0.00024		9.801e-07	2.34256e-05	2.4025e-06	3.66025e-05	1.16964e-05	3.7249e-06	4.0804e-06	5.76e-08
24.8	0.06304	0.06886	0.064	0.0549	0.04048	0.05008	0.03963	0.01441		24.8	0.0611	0.0703	0.0615	0.0507	0.042	0.0471	0.044	0.0205		0.00194	-0.00144	0.0025	0.0042	-0.00152	0.00298	-0.00437	-0.00609		3.7636e-06	2.0736e-06	6.25e-06	1.764e-05	2.3104e-06	8.8804e-06	1.90969e-05	3.70881e-05
25	0.06314	0.06851	0.06165	0.05555	0.04273	0.04753	0.03973	0.01156		25	0.0602	0.0697	0.0609	0.0509	0.041	0.047	0.0436	0.0208		0.00294	-0.00119	0.00075	0.00465	0.00173	0.00053	-0.00387	-0.00924		8.6436e-06	1.4161e-06	5.625e-07	2.16225e-05	2.9929e-06	2.809e-07	1.49769e-05	8.53776e-05
25.2	0.06334	0.06691	0.06295	0.0543	0.04158	0.04593	0.04303	0.01546		25.2	0.0601	0.0695	0.0601	0.0511	0.0404	0.0466	0.043	0.0209		0.00324	-0.00259	0.00285	0.0032	0.00118	-0.00067	3e-05	-0.00544		1.04976e-05	6.7081e-06	8.1225e-06	1.024e-05	1.3924e-06	4.489e-07	9e-10	2.95936e-05
25.4	0.06584	0.06811	0.0639	0.0556	0.03848	0.04703	0.03958	0.01661		25.4	0.0596	0.0701	0.0594	0.0511	0.0401	0.0462	0.0422	0.022		0.00624	-0.00199	0.0045	0.0045	-0.00162	0.00083	-0.00262	-0.00539		3.89376e-05	3.9601e-06	2.025e-05	2.025e-05	2.6244e-06	6.889e-07	6.8644e-06	2.90521e-05
25.6	0.06379	0.06956	0.06485	0.0544	0.03748	0.04748	0.03928	0.01271		25.6	0.0596	0.07	0.0589	0.051	0.0404	0.046	0.0414	0.0202		0.00419	-0.00044	0.00595	0.0034	-0.00292	0.00148	-0.00212	-0.00749		1.75561e-05	1.936e-07	3.54025e-05	1.156e-05	8.5264e-06	2.1904e-06	4.4944e-06	5.61001e-05
25.8	0.06579	0.07061	0.06335	0.0578	0.03753	0.05143	0.04078	0.00901		25.8	0.0595	0.0687	0.0591	0.0508	0.0409	0.0462	0.0418	0.0197		0.00629	0.00191	0.00425	0.007	-0.00337	0.00523	-0.00102	-0.01069		3.95641e-05	3.6481e-06	1.80625e-05	4.9e-05	1.13569e-05	2.73529e-05	1.0404e-06	0.000114276
26	0.06299	0.07181	0.05995	0.05645	0.03908	0.04698	0.03908	0.01261		26	0.0598	0.0678	0.0596	0.0505	0.0415	0.0462	0.0424	0.0209		0.00319	0.00401	0.00035	0.00595	-0.00242	0.00078	-0.00332	-0.00829		1.01761e-05	1.60801e-05	1.225e-07	3.54025e-05	5.8564e-06	6.084e-07	1.10224e-05	6.87241e-05
26.2	0.06134	0.06631	0.0583	0.0556	0.04018	0.05188	0.04173	0.02541		26.2	0.0591	0.0675	0.0598	0.0503	0.0418	0.0464	0.0426	0.0213		0.00224	-0.00119	-0.0015	0.0053	-0.00162	0.00548	-0.00087	0.00411		5.0176e-06	1.4161e-06	2.25e-06	2.809e-05	2.6244e-06	3.00304e-05	7.569e-07	1.68921e-05
26.4	0.06489	0.06786	0.0603	0.0546	0.03793	0.05023	0.04013	0.02116		26.4	0.0591	0.067	0.0594	0.0498	0.0417	0.0462	0.0428	0.0217		0.00579	0.00086	0.0009	0.0048	-0.00377	0.00403	-0.00267	-0.00054		3.35241e-05	7.396e-07	8.1e-07	2.304e-05	1.42129e-05	1.62409e-05	7.1289e-06	2.916e-07
26.6	0.06294	0.06696	0.06205	0.0532	0.03788	0.04638	0.04148	0.01801		26.6	0.0591	0.0666	0.0587	0.049	0.0409	0.0455	0.0426	0.0211		0.00384	0.00036	0.00335	0.0042	-0.00302	0.00088	-0.00112	-0.00309		1.47456e-05	1.296e-07	1.12225e-05	1.764e-05	9.1204e-06	7.744e-07	1.2544e-06	9.5481e-06
26.8	0.06299	0.06601	0.064	0.055	0.03958	0.04783	0.03673	0.01386		26.8	0.059	0.0664	0.0578	0.0479	0.0399	0.0445	0.0424	0.02		0.00399	-0.00039	0.0062	0.0071	-0.00032	0.00333	-0.00567	-0.00614		1.59201e-05	1.521e-07	3.844e-05	5.041e-05	1.024e-07	1.10889e-05	3.21489e-05	3.76996e-05
27	0.06019	0.06451	0.0634	0.05575	0.03518	0.05033	0.03768	0.01056		27	0.0594	0.0662	0.0574	0.0471	0.0388	0.0436	0.042	0.0206		0.00079	-0.00169	0.006	0.00865	-0.00362	0.00673	-0.00432	-0.01004		6.241e-07	2.8561e-06	3.6e-05	7.48225e-05	1.31044e-05	4.52929e-05	1.86624e-05	0.000100802
27.2	0.06329	0.06651	0.06065	0.0565	0.03548	0.04803	0.03853	0.01131		27.2	0.0592	0.0656	0.0577	0.0475	0.0384	0.0436	0.0417	0.0208		0.00409	0.00091	0.00295	0.009	-0.00292	0.00443	-0.00317	-0.00949		1.67281e-05	8.281e-07	8.7025e-06	8.1e-05	8.5264e-06	1.96249e-05	1.00489e-05	9.00601e-05
27.4	0.06294	0.07146	0.059	0.05265	0.04243	0.04448	0.04033	0.02361		27.4	0.059	0.0655	0.0581	0.0482	0.0385	0.0441	0.0414	0.0213		0.00394	0.00596	0.0009	0.00445	0.00393	0.00038	-0.00107	0.00231		1.55236e-05	3.55216e-05	8.1e-07	1.98025e-05	1.54449e-05	1.444e-07	1.1449e-06	5.3361e-06
27.6	0.06299	0.06906	0.057	0.0579	0.04318	0.04998	0.04143	0.02091		27.6	0.0586	0.0654	0.0582	0.0489	0.0391	0.045	0.0409	0.0215		0.00439	0.00366	-0.0012	0.009	0.00408	0.00498	0.00053	-0.00059		1.92721e-05	1.33956e-05	1.44e-06	8.1e-05	1.66464e-05	2.48004e-05	2.809e-07	3.481e-07
27.8	0.06239	0.06886	0.0605	0.05525	0.03993	0.04673	0.04283	0.01656		27.8	0.0578	0.0646	0.0586	0.0496	0.0399	0.0456	0.0405	0.0199		0.00459	0.00426	0.0019	0.00565	3e-05	0.00113	0.00233	-0.00334		2.10681e-05	1.81476e-05	3.61e-06	3.19225e-05	9e-10	1.2769e-06	5.4289e-06	1.11556e-05
28	0.06404	0.06856	0.06275	0.0527	0.03428	0.04978	0.03853	0.01276		28	0.0571	0.064	0.0585	0.05	0.0404	0.0457	0.0406	0.0198		0.00694	0.00456	0.00425	0.0027	-0.00612	0.00408	-0.00207	-0.00704		4.81636e-05	2.07936e-05	1.80625e-05	7.29e-06	3.74544e-05	1.66464e-05	4.2849e-06	4.95616e-05
28.2	0.06169	0.06641	0.06405	0.05005	0.03418	0.05063	0.03998	0.00746		28.2	0.0566	0.0637	0.0576	0.0499	0.0405	0.0452	0.0405	0.021		0.00509	0.00271	0.00645	0.00015	-0.00632	0.00543	-0.00052	-0.01354		2.59081e-05	7.3441e-06	4.16025e-05	2.25e-08	3.99424e-05	2.94849e-05	2.704e-07	0.000183332
28.4	0.06004	0.06286	0.06325	0.0526	0.03418	0.04833	0.03833	0.00946		28.4	0.0565	0.0639	0.0568	0.0495	0.0401	0.0445	0.0406	0.0207		0.00354	-0.00104	0.00645	0.0031	-0.00592	0.00383	-0.00227	-0.01124		1.25316e-05	1.0816e-06	4.16025e-05	9.61e-06	3.50464e-05	1.46689e-05	5.1529e-06	0.000126338
28.6	0.05939	0.06936	0.0601	0.05085	0.03418	0.04778	0.03708	0.01516		28.6	0.0569	0.0637	0.0566	0.0489	0.0389	0.0435	0.0408	0.0209		0.00249	0.00566	0.0035	0.00195	-0.00472	0.00428	-0.00372	-0.00574		6.2001e-06	3.20356e-05	1.225e-05	3.8025e-06	2.22784e-05	1.83184e-05	1.38384e-05	3.29476e-05
28.8	0.06219	0.06751	0.05775	0.0501	0.03938	0.04938	0.03743	0.01401		28.8	0.0574	0.0641	0.0567	0.048	0.0375	0.0428	0.0406	0.0202		0.00479	0.00341	0.00105	0.0021	0.00188	0.00658	-0.00317	-0.00619		2.29441e-05	1.16281e-05	1.1025e-06	4.41e-06	3.5344e-06	4.32964e-05	1.00489e-05	3.83161e-05
29	0.06069	0.06206	0.05935	0.05175	0.03888	0.04838	0.03898	0.01561		29	0.0572	0.0645	0.057	0.0474	0.0367	0.0425	0.0401	0.0196		0.00349	-0.00244	0.00235	0.00435	0.00218	0.00588	-0.00112	-0.00399		1.21801e-05	5.9536e-06	5.5225e-06	1.89225e-05	4.7524e-06	3.45744e-05	1.2544e-06	1.59201e-05
29.2	0.06314	0.06301	0.0613	0.05005	0.03508	0.04573	0.03853	0.01301		29.2	0.0574	0.0648	0.0578	0.0469	0.0365	0.0426	0.0396	0.0203		0.00574	-0.00179	0.0035	0.00315	-0.00142	0.00313	-0.00107	-0.00729		3.29476e-05	3.2041e-06	1.225e-05	9.9225e-06	2.0164e-06	9.7969e-06	1.1449e-06	5.31441e-05
29.4	0.06064	0.06686	0.0637	0.0537	0.03593	0.04753	0.03733	0.02181		29.4	0.057	0.0646	0.058	0.0469	0.0369	0.0432	0.0392	0.0207		0.00364	0.00226	0.0057	0.0068	-0.00097	0.00433	-0.00187	0.00111		1.32496e-05	5.1076e-06	3.249e-05	4.624e-05	9.409e-07	1.87489e-05	3.4969e-06	1.2321e-06
29.6	0.06234	0.06481	0.06135	0.0565	0.03823	0.04803	0.03838	0.02346		29.6	0.057	0.0646	0.0578	0.0471	0.0377	0.0438	0.0389	0.0213		0.00534	0.00021	0.00355	0.0094	0.00053	0.00423	-0.00052	0.00216		2.85156e-05	4.41e-08	1.26025e-05	8.836e-05	2.809e-07	1.78929e-05	2.704e-07	4.6656e-06
29.8	0.06029	0.06621	0.0586	0.0554	0.03523	0.04328	0.03968	0.01241		29.8	0.0569	0.0643	0.0576	0.0474	0.0383	0.0443	0.0389	0.0207		0.00339	0.00191	0.001	0.008	-0.00307	-0.00102	0.00078	-0.00829		1.14921e-05	3.6481e-06	1e-06	6.4e-05	9.4249e-06	1.0404e-06	6.084e-07	6.87241e-05
30	0.06069	0.07081	0.059	0.0541	0.03268	0.04773	0.03883	0.01116		30	0.0567	0.0644	0.0571	0.0472	0.0385	0.0438	0.0393	0.0195		0.00399	0.00641	0.0019	0.0069	-0.00582	0.00393	-0.00047	-0.00834		1.59201e-05	4.10881e-05	3.61e-06	4.761e-05	3.38724e-05	1.54449e-05	2.209e-07	6.95556e-05
30.2	0.05919	0.06966	0.0587	0.0551	0.03278	0.04713	0.03603	0.00761		30.2	0.0566	0.0649	0.0569	0.0473	0.0386	0.0431	0.0398	0.0202		0.00259	0.00476	0.0018	0.0078	-0.00582	0.00403	-0.00377	-0.01259		6.7081e-06	2.26576e-05	3.24e-06	6.084e-05	3.38724e-05	1.62409e-05	1.42129e-05	0.000158508
30.4	0.06124	0.06806	0.0604	0.0514	0.03163	0.04573	0.04023	0.00826		30.4	0.0566	0.0649	0.0571	0.0475	0.0385	0.0427	0.0399	0.0206		0.00464	0.00316	0.0033	0.0039	-0.00687	0.00303	0.00033	-0.01234		2.15296e-05	9.9856e-06	1.089e-05	1.521e-05	4.71969e-05	9.1809e-06	1.089e-07	0.000152276
30.6	0.06099	0.07406	0.06385	0.0449	0.03563	0.04663	0.03308	0.02626		30.6	0.0569	0.0643	0.0578	0.0484	0.038	0.0428	0.04	0.0205		0.00409	0.00976	0.00605	-0.0035	-0.00237	0.00383	-0.00692	0.00576		1.67281e-05	9.52576e-05	3.66025e-05	1.225e-05	5.6169e-06	1.46689e-05	4.78864e-05	3.31776e-05
30.8	0.05879	0.07251	0.06285	0.0483	0.03313	0.04658	0.03628	0.02426		30.8	0.057	0.0638	0.0583	0.0483	0.0377	0.0433	0.0402	0.0204		0.00179	0.00871	0.00455	0	-0.00457	0.00328	-0.00392	0.00386		3.2041e-06	7.58641e-05	2.07025e-05	0	2.08849e-05	1.07584e-05	1.53664e-05	1.48996e-05
31	0.05894	0.06786	0.06245	0.0494	0.03633	0.04418	0.03548	0.01776		31	0.0572	0.0635	0.0587	0.048	0.0375	0.0431	0.0398	0.0196		0.00174	0.00436	0.00375	0.0014	-0.00117	0.00108	-0.00432	-0.00184		3.0276e-06	1.90096e-05	1.40625e-05	1.96e-06	1.3689e-06	1.1664e-06	1.86624e-05	3.3856e-06
31.2	0.06084	0.06436	0.061	0.0533	0.03703	0.04543	0.04013	0.01721		31.2	0.0575	0.0633	0.0592	0.0473	0.0378	0.0428	0.0393	0.0195		0.00334	0.00106	0.0018	0.006	-0.00077	0.00263	0.00083	-0.00229		1.11556e-05	1.1236e-06	3.24e-06	3.6e-05	5.929e-07	6.9169e-06	6.889e-07	5.2441e-06
31.4	0.05644	0.05711	0.05775	0.05125	0.03813	0.04293	0.03643	0.01606		31.4	0.0576	0.0628	0.0592	0.0466	0.0378	0.0422	0.0387	0.0205		-0.00116	-0.00569	-0.00145	0.00465	0.00033	0.00073	-0.00227	-0.00444		1.3456e-06	3.23761e-05	2.1025e-06	2.16225e-05	1.089e-07	5.329e-07	5.1529e-06	1.97136e-05
31.6	0.06264	0.05946	0.0581	0.05115	0.03368	0.04613	0.03673	0.01496		31.6	0.0582	0.0624	0.0593	0.046	0.0381	0.0418	0.0385	0.0208		0.00444	-0.00294	-0.0012	0.00515	-0.00442	0.00433	-0.00177	-0.00584		1.97136e-05	8.6436e-06	1.44e-06	2.65225e-05	1.95364e-05	1.87489e-05	3.1329e-06	3.41056e-05
31.8	0.06129	0.06341	0.0591	0.04875	0.03538	0.04543	0.03718	0.01491		31.8	0.0578	0.0627	0.0592	0.0459	0.0382	0.0417	0.0384	0.0209		0.00349	0.00071	-0.0001	0.00285	-0.00282	0.00373	-0.00122	-0.00599		1.21801e-05	5.041e-07	1e-08	8.1225e-06	7.9524e-06	1.39129e-05	1.4884e-06	3.58801e-05
32	0.05809	0.06101	0.06125	0.04785	0.03333	0.04638	0.03648	0.01416		32	0.0572	0.0625	0.0589	0.046	0.0381	0.0418	0.0386	0.0201		0.00089	-0.00149	0.00235	0.00185	-0.00477	0.00458	-0.00212	-0.00594		7.921e-07	2.2201e-06	5.5225e-06	3.4225e-06	2.27529e-05	2.09764e-05	4.4944e-06	3.52836e-05
32.2	0.06084	0.06261	0.06205	0.04615	0.03778	0.04298	0.03503	0.00961		32.2	0.0571	0.0618	0.0585	0.0463	0.0377	0.042	0.0387	0.0195		0.00374	0.00081	0.00355	-0.00015	8e-05	0.00098	-0.00367	-0.00989		1.39876e-05	6.561e-07	1.26025e-05	2.25e-08	6.4e-09	9.604e-07	1.34689e-05	9.78121e-05
32.4	0.05939	0.06466	0.05905	0.0488	0.03513	0.04193	0.03713	0.01246		32.4	0.0566	0.0606	0.0579	0.0468	0.0372	0.0425	0.0386	0.0201		0.00279	0.00406	0.00115	0.002	-0.00207	-0.00057	-0.00147	-0.00764		7.7841e-06	1.64836e-05	1.3225e-06	4e-06	4.2849e-06	3.249e-07	2.1609e-06	5.83696e-05
32.6	0.05629	0.05971	0.05825	0.04965	0.03783	0.03873	0.03878	0.01946		32.6	0.0559	0.0599	0.0572	0.0472	0.0366	0.0427	0.0383	0.0208		0.00039	-0.00019	0.00105	0.00245	0.00123	-0.00397	0.00048	-0.00134		1.521e-07	3.61e-08	1.1025e-06	6.0025e-06	1.5129e-06	1.57609e-05	2.304e-07	1.7956e-06
32.8	0.05954	0.05881	0.0581	0.05185	0.03383	0.03753	0.03728	0.01731		32.8	0.0555	0.0598	0.0567	0.0467	0.0361	0.0426	0.0384	0.0214		0.00404	-0.00099	0.0014	0.00515	-0.00227	-0.00507	-0.00112	-0.00409		1.63216e-05	9.801e-07	1.96e-06	2.65225e-05	5.1529e-06	2.57049e-05	1.2544e-06	1.67281e-05
33	0.05949	0.06081	0.05775	0.0469	0.03518	0.04623	0.03553	0.01386		33	0.0545	0.0596	0.0567	0.0459	0.036	0.0422	0.038	0.0202		0.00499	0.00121	0.00105	0.001	-0.00082	0.00403	-0.00247	-0.00634		2.49001e-05	1.4641e-06	1.1025e-06	1e-06	6.724e-07	1.62409e-05	6.1009e-06	4.01956e-05
33.2	0.05784	0.06086	0.06155	0.0436	0.03723	0.04908	0.03418	0.01136		33.2	0.0544	0.0593	0.0565	0.0453	0.0362	0.0416	0.0378	0.0189		0.00344	0.00156	0.00505	-0.0017	0.00103	0.00748	-0.00362	-0.00754		1.18336e-05	2.4336e-06	2.55025e-05	2.89e-06	1.0609e-06	5.59504e-05	1.31044e-05	5.68516e-05
33.4	0.05749	0.05826	0.0614	0.04975	0.03063	0.04433	0.03273	0.01271		33.4	0.0542	0.0592	0.0563	0.0451	0.0364	0.0409	0.0375	0.0196		0.00329	-0.00094	0.0051	0.00465	-0.00577	0.00343	-0.00477	-0.00689		1.08241e-05	8.836e-07	2.601e-05	2.16225e-05	3.32929e-05	1.17649e-05	2.27529e-05	4.74721e-05
33.6	0.05869	0.05941	0.0599	0.0507	0.03303	0.04558	0.03343	0.01451		33.6	0.0534	0.0593	0.0561	0.0452	0.0364	0.0407	0.037	0.0207		0.00529	0.00011	0.0038	0.0055	-0.00337	0.00488	-0.00357	-0.00619		2.79841e-05	1.21e-08	1.444e-05	3.025e-05	1.13569e-05	2.38144e-05	1.27449e-05	3.83161e-05
33.8	0.05789	0.06196	0.0562	0.05495	0.03573	0.04623	0.03643	0.01201		33.8	0.0535	0.0593	0.0559	0.0454	0.0361	0.041	0.0372	0.0205		0.00439	0.00266	0.0003	0.00955	-0.00037	0.00523	-0.00077	-0.00849		1.92721e-05	7.0756e-06	9e-08	9.12025e-05	1.369e-07	2.73529e-05	5.929e-07	7.20801e-05
34	0.05869	0.06201	0.05495	0.053	0.03348	0.05058	0.03898	0.01141		34	0.0535	0.0594	0.0555	0.0456	0.0355	0.041	0.0371	0.0203		0.00519	0.00261	-0.00055	0.0074	-0.00202	0.00958	0.00188	-0.00889		2.69361e-05	6.8121e-06	3.025e-07	5.476e-05	4.0804e-06	9.17764e-05	3.5344e-06	7.90321e-05
34.2	0.05759	0.06296	0.05585	0.04575	0.03193	0.04323	0.03298	0.00926		34.2	0.0532	0.0594	0.0553	0.0454	0.035	0.0413	0.0369	0.0191		0.00439	0.00356	0.00055	0.00035	-0.00307	0.00193	-0.00392	-0.00984		1.92721e-05	1.26736e-05	3.025e-07	1.225e-07	9.4249e-06	3.7249e-06	1.53664e-05	9.68256e-05
34.4	0.05779	0.06546	0.05825	0.0451	0.03473	0.04303	0.03703	0.00816		34.4	0.0535	0.0593	0.0552	0.0449	0.0345	0.0411	0.0371	0.0183		0.00429	0.00616	0.00305	0.0002	0.00023	0.00193	-7e-05	-0.01014		1.84041e-05	3.79456e-05	9.3025e-06	4e-08	5.29e-08	3.7249e-06	4.9e-09	0.00010282
34.6	0.05919	0.06406	0.0602	0.0392	0.02983	0.04383	0.03423	0.01901		34.6	0.0532	0.059	0.0552	0.0447	0.0343	0.0408	0.0369	0.0194		0.00599	0.00506	0.005	-0.0055	-0.00447	0.00303	-0.00267	-0.00039		3.58801e-05	2.56036e-05	2.5e-05	3.025e-05	1.99809e-05	9.1809e-06	7.1289e-06	1.521e-07
34.8	0.05539	0.06166	0.06055	0.04535	0.02943	0.04098	0.03433	0.01596		34.8	0.0531	0.0587	0.0551	0.0446	0.0347	0.0403	0.0367	0.0201		0.00229	0.00296	0.00545	0.00075	-0.00527	0.00068	-0.00237	-0.00414		5.2441e-06	8.7616e-06	2.97025e-05	5.625e-07	2.77729e-05	4.624e-07	5.6169e-06	1.71396e-05
35	0.05629	0.06231	0.0587	0.0472	0.04018	0.04173	0.03213	0.01416		35	0.0532	0.0586	0.0549	0.0447	0.0351	0.0399	0.0369	0.0202		0.00309	0.00371	0.0038	0.0025	0.00508	0.00183	-0.00477	-0.00604		9.5481e-06	1.37641e-05	1.444e-05	6.25e-06	2.58064e-05	3.3489e-06	2.27529e-05	3.64816e-05
35.2	0.05574	0.06156	0.056	0.0483	0.03688	0.04508	0.03708	0.01181		35.2	0.0531	0.0586	0.0544	0.0447	0.0354	0.0396	0.0368	0.0199		0.00264	0.00296	0.0016	0.0036	0.00148	0.00548	0.00028	-0.00809		6.9696e-06	8.7616e-06	2.56e-06	1.296e-05	2.1904e-06	3.00304e-05	7.84e-08	6.54481e-05
35.4	0.05394	0.06031	0.05325	0.05325	0.03668	0.04513	0.03883	0.00906		35.4	0.0528	0.0581	0.0543	0.0445	0.0355	0.0396	0.0367	0.0184		0.00114	0.00221	-0.00105	0.00875	0.00118	0.00553	0.00213	-0.00934		1.2996e-06	4.8841e-06	1.1025e-06	7.65625e-05	1.3924e-06	3.05809e-05	4.5369e-06	8.72356e-05
35.6	0.05269	0.06021	0.05245	0.0504	0.03338	0.04743	0.03358	0.00841		35.6	0.0531	0.0578	0.0541	0.0444	0.0353	0.0395	0.0365	0.0185		-0.00041	0.00241	-0.00165	0.006	-0.00192	0.00793	-0.00292	-0.01009		1.681e-07	5.8081e-06	2.7225e-06	3.6e-05	3.6864e-06	6.28849e-05	8.5264e-06	0.000101808
35.8	0.05499	0.05776	0.0578	0.0475	0.03283	0.04673	0.03438	0.01136		35.8	0.0531	0.0575	0.0538	0.0444	0.0352	0.0396	0.0361	0.0195		0.00189	0.00026	0.004	0.0031	-0.00237	0.00713	-0.00172	-0.00814		3.5721e-06	6.76e-08	1.6e-05	9.61e-06	5.6169e-06	5.08369e-05	2.9584e-06	6.62596e-05
36	0.05424	0.05836	0.06235	0.04125	0.03028	0.04493	0.03118	0.01271		36	0.053	0.0572	0.0541	0.0442	0.035	0.0396	0.0362	0.0196		0.00124	0.00116	0.00825	-0.00295	-0.00472	0.00533	-0.00502	-0.00689		1.5376e-06	1.3456e-06	6.80625e-05	8.7025e-06	2.22784e-05	2.84089e-05	2.52004e-05	4.74721e-05
36.2	0.05639	0.05996	0.0619	0.04245	0.02933	0.04213	0.03298	0.01201		36.2	0.053	0.0568	0.0542	0.044	0.035	0.0395	0.0363	0.0199		0.00339	0.00316	0.0077	-0.00155	-0.00567	0.00263	-0.00332	-0.00789		1.14921e-05	9.9856e-06	5.929e-05	2.4025e-06	3.21489e-05	6.9169e-06	1.10224e-05	6.22521e-05
36.4	0.05639	0.05716	0.05645	0.04335	0.03388	0.04038	0.03208	0.01096		36.4	0.0529	0.0562	0.0541	0.0439	0.0348	0.0393	0.0361	0.0195		0.00349	0.00096	0.00235	-0.00055	-0.00092	0.00108	-0.00402	-0.00854		1.21801e-05	9.216e-07	5.5225e-06	3.025e-07	8.464e-07	1.1664e-06	1.61604e-05	7.29316e-05
36.6	0.05454	0.05821	0.0542	0.0417	0.03768	0.03943	0.03483	0.00936		36.6	0.0524	0.0562	0.0541	0.0437	0.0346	0.0391	0.0361	0.0185		0.00214	0.00201	0.0001	-0.002	0.00308	0.00033	-0.00127	-0.00914		4.5796e-06	4.0401e-06	1e-08	4e-06	9.4864e-06	1.089e-07	1.6129e-06	8.35396e-05
36.8	0.05514	0.06226	0.05205	0.0453	0.04013	0.03923	0.02898	0.01001		36.8	0.052	0.0563	0.0536	0.0438	0.0342	0.039	0.036	0.019		0.00314	0.00596	-0.00155	0.0015	0.00593	0.00023	-0.00702	-0.00899		9.8596e-06	3.55216e-05	2.4025e-06	2.25e-06	3.51649e-05	5.29e-08	4.92804e-05	8.08201e-05
37	0.05299	0.06066	0.05385	0.04555	0.03893	0.04408	0.03513	0.01616		37	0.0517	0.0565	0.0535	0.044	0.0339	0.0389	0.0359	0.0196		0.00129	0.00416	0.00035	0.00155	0.00503	0.00518	-0.00077	-0.00344		1.6641e-06	1.73056e-05	1.225e-07	2.4025e-06	2.53009e-05	2.68324e-05	5.929e-07	1.18336e-05
37.2	0.05514	0.05941	0.0544	0.04455	0.02963	0.04338	0.03658	0.01411		37.2	0.0513	0.0566	0.0535	0.0441	0.0336	0.039	0.036	0.0199		0.00384	0.00281	0.0009	0.00045	-0.00397	0.00438	0.00058	-0.00579		1.47456e-05	7.8961e-06	8.1e-07	2.025e-07	1.57609e-05	1.91844e-05	3.364e-07	3.35241e-05
37.4	0.05389	0.05621	0.0565	0.05015	0.03318	0.04563	0.03578	0.01136		37.4	0.0513	0.0563	0.0533	0.0442	0.0333	0.0391	0.0358	0.0202		0.00259	-9e-05	0.0032	0.00595	-0.00012	0.00653	-2e-05	-0.00884		6.7081e-06	8.1e-09	1.024e-05	3.54025e-05	1.44e-08	4.26409e-05	4e-10	7.81456e-05
37.6	0.05264	0.05581	0.0569	0.0482	0.03053	0.04438	0.03398	0.00881		37.6	0.0507	0.0558	0.0533	0.0443	0.0331	0.0393	0.0352	0.0191		0.00194	1e-05	0.0036	0.0039	-0.00257	0.00508	-0.00122	-0.01029		3.7636e-06	1e-10	1.296e-05	1.521e-05	6.6049e-06	2.58064e-05	1.4884e-06	0.000105884
37.8	0.05324	0.05841	0.0552	0.04585	0.03163	0.03973	0.03353	0.01061		37.8	0.0504	0.0554	0.053	0.0443	0.033	0.0393	0.0347	0.0178		0.00284	0.00301	0.0022	0.00155	-0.00137	0.00043	-0.00117	-0.00719		8.0656e-06	9.0601e-06	4.84e-06	2.4025e-06	1.8769e-06	1.849e-07	1.3689e-06	5.16961e-05
38	0.05459	0.06056	0.0551	0.03885	0.03138	0.03943	0.03273	0.01031		38	0.05	0.0552	0.0527	0.0444	0.0329	0.0392	0.0343	0.0186		0.00459	0.00536	0.0024	-0.00555	-0.00152	0.00023	-0.00157	-0.00829		2.10681e-05	2.87296e-05	5.76e-06	3.08025e-05	2.3104e-06	5.29e-08	2.4649e-06	6.87241e-05
38.2	0.05464	0.05766	0.0474	0.04325	0.03253	0.03873	0.03083	0.01721		38.2	0.0501	0.0549	0.0526	0.0438	0.0328	0.0387	0.0341	0.0193		0.00454	0.00276	-0.0052	-0.00055	-0.00027	3e-05	-0.00327	-0.00209		2.06116e-05	7.6176e-06	2.704e-05	3.025e-07	7.29e-08	9e-10	1.06929e-05	4.3681e-06
38.4	0.05509	0.05761	0.04795	0.04425	0.03283	0.04013	0.02953	0.01671		38.4	0.0497	0.0548	0.0527	0.0433	0.0327	0.0383	0.0341	0.0194		0.00539	0.00281	-0.00475	0.00095	0.00013	0.00183	-0.00457	-0.00269		2.90521e-05	7.8961e-06	2.25625e-05	9.025e-07	1.69e-08	3.3489e-06	2.08849e-05	7.2361e-06
38.6	0.05259	0.05896	0.05305	0.03845	0.03343	0.04008	0.03128	0.01406		38.6	0.0493	0.0548	0.0521	0.0427	0.0325	0.0379	0.0342	0.0194		0.00329	0.00416	0.00095	-0.00425	0.00093	0.00218	-0.00292	-0.00534		1.08241e-05	1.73056e-05	9.025e-07	1.80625e-05	8.649e-07	4.7524e-06	8.5264e-06	2.85156e-05
38.8	0.05104	0.05536	0.05635	0.04335	0.02248	0.04188	0.03273	0.01081		38.8	0.0491	0.0549	0.052	0.0422	0.0322	0.0378	0.034	0.0183		0.00194	0.00046	0.00435	0.00115	-0.00972	0.00408	-0.00127	-0.00749		3.7636e-06	2.116e-07	1.89225e-05	1.3225e-06	9.44784e-05	1.66464e-05	1.6129e-06	5.61001e-05
39	0.05384	0.05586	0.05965	0.0471	0.02468	0.03828	0.03483	0.01076		39	0.049	0.0545	0.052	0.0418	0.0321	0.038	0.0336	0.0177		0.00484	0.00136	0.00765	0.0053	-0.00742	0.00028	0.00123	-0.00694		2.34256e-05	1.8496e-06	5.85225e-05	2.809e-05	5.50564e-05	7.84e-08	1.5129e-06	4.81636e-05
39.2	0.05314	0.05601	0.0566	0.055	0.02548	0.03953	0.03338	0.01131		39.2	0.0492	0.0543	0.052	0.0419	0.0322	0.0381	0.0335	0.0182		0.00394	0.00171	0.0046	0.0131	-0.00672	0.00143	-0.00012	-0.00689		1.55236e-05	2.9241e-06	2.116e-05	0.00017161	4.51584e-05	2.0449e-06	1.44e-08	4.74721e-05
39.4	0.05264	0.05376	0.05305	0.04695	0.02458	0.04083	0.02838	0.01211		39.4	0.0491	0.0539	0.0515	0.0421	0.0323	0.0382	0.0338	0.019		0.00354	-0.00014	0.00155	0.00485	-0.00772	0.00263	-0.00542	-0.00689		1.25316e-05	1.96e-08	2.4025e-06	2.35225e-05	5.95984e-05	6.9169e-06	2.93764e-05	4.74721e-05
39.6	0.04919	0.05741	0.0511	0.0414	0.02783	0.04243	0.02928	0.01211		39.6	0.0492	0.0536	0.0513	0.0421	0.0324	0.0382	0.034	0.0191		-1e-05	0.00381	-0.0002	-0.0007	-0.00457	0.00423	-0.00472	-0.00699		1e-10	1.45161e-05	4e-08	4.9e-07	2.08849e-05	1.78929e-05	2.22784e-05	4.88601e-05
39.8	0.05139	0.05711	0.04925	0.0439	0.02928	0.03863	0.03238	0.00931		39.8	0.0491	0.0534	0.051	0.0419	0.0325	0.038	0.0341	0.0191		0.00229	0.00371	-0.00175	0.002	-0.00322	0.00063	-0.00172	-0.00979		5.2441e-06	1.37641e-05	3.0625e-06	4e-06	1.03684e-05	3.969e-07	2.9584e-06	9.58441e-05
40	0.05084	0.05451	0.05135	0.0416	0.03228	0.04173	0.03143	0.00981		40	0.0489	0.0533	0.0509	0.0416	0.0326	0.0375	0.0341	0.0184		0.00194	0.00121	0.00045	0	-0.00032	0.00423	-0.00267	-0.00859		3.7636e-06	1.4641e-06	2.025e-07	0	1.024e-07	1.78929e-05	7.1289e-06	7.37881e-05
40.2	0.04924	0.05616	0.05395	0.0419	0.03098	0.03753	0.03103	0.01376		40.2	0.0486	0.0533	0.0509	0.0413	0.0326	0.037	0.0341	0.0177		0.00064	0.00286	0.00305	0.0006	-0.00162	0.00053	-0.00307	-0.00394		4.096e-07	8.1796e-06	9.3025e-06	3.6e-07	2.6244e-06	2.809e-07	9.4249e-06	1.55236e-05
40.4	0.05214	0.05481	0.05675	0.044	0.03183	0.03878	0.03193	0.01396		40.4	0.0484	0.0533	0.0509	0.0413	0.0323	0.0366	0.0344	0.0183		0.00374	0.00151	0.00585	0.0027	-0.00047	0.00218	-0.00247	-0.00434		1.39876e-05	2.2801e-06	3.42225e-05	7.29e-06	2.209e-07	4.7524e-06	6.1009e-06	1.88356e-05
40.6	0.04819	0.05431	0.0562	0.04355	0.03003	0.03918	0.03228	0.01481		40.6	0.0482	0.0527	0.0509	0.0415	0.032	0.0367	0.0346	0.0186		-1e-05	0.00161	0.0053	0.00205	-0.00197	0.00248	-0.00232	-0.00379		1e-10	2.5921e-06	2.809e-05	4.2025e-06	3.8809e-06	6.1504e-06	5.3824e-06	1.43641e-05
40.8	0.04769	0.05531	0.0521	0.04265	0.02873	0.03783	0.02978	0.01001		40.8	0.0479	0.052	0.0508	0.0415	0.0317	0.0368	0.0345	0.0188		-0.00021	0.00331	0.0013	0.00115	-0.00297	0.00103	-0.00472	-0.00879		4.41e-08	1.09561e-05	1.69e-06	1.3225e-06	8.8209e-06	1.0609e-06	2.22784e-05	7.72641e-05
41	0.04974	0.05426	0.05115	0.0411	0.02733	0.03723	0.02953	0.00726		41	0.0478	0.0518	0.0506	0.0414	0.0315	0.0368	0.0341	0.019		0.00194	0.00246	0.00055	-0.0003	-0.00417	0.00043	-0.00457	-0.01174		3.7636e-06	6.0516e-06	3.025e-07	9e-08	1.73889e-05	1.849e-07	2.08849e-05	0.000137828
41.2	0.04819	0.05396	0.049	0.0409	0.03198	0.03843	0.03073	0.00751		41.2	0.0472	0.0516	0.0502	0.0411	0.0313	0.0366	0.0334	0.0182		0.00099	0.00236	-0.0012	-0.0002	0.00068	0.00183	-0.00267	-0.01069		9.801e-07	5.5696e-06	1.44e-06	4e-08	4.624e-07	3.3489e-06	7.1289e-06	0.000114276
41.4	0.05029	0.05276	0.04935	0.0388	0.02698	0.03703	0.03208	0.01116		41.4	0.047	0.051	0.05	0.041	0.0312	0.0365	0.0329	0.0176		0.00329	0.00176	-0.00065	-0.0022	-0.00422	0.00053	-0.00082	-0.00644		1.08241e-05	3.0976e-06	4.225e-07	4.84e-06	1.78084e-05	2.809e-07	6.724e-07	4.14736e-05
41.6	0.04959	0.05296	0.05065	0.0386	0.02923	0.03738	0.02848	0.01136		41.6	0.0469	0.0505	0.0498	0.0407	0.031	0.0361	0.0326	0.018		0.00269	0.00246	0.00085	-0.0021	-0.00177	0.00128	-0.00412	-0.00664		7.2361e-06	6.0516e-06	7.225e-07	4.41e-06	3.1329e-06	1.6384e-06	1.69744e-05	4.40896e-05
41.8	0.04749	0.05171	0.05215	0.03705	0.02728	0.03913	0.02818	0.00976		41.8	0.0465	0.0505	0.0498	0.0403	0.0308	0.036	0.0323	0.0187		0.00099	0.00121	0.00235	-0.00325	-0.00352	0.00313	-0.00412	-0.00894		9.801e-07	1.4641e-06	5.5225e-06	1.05625e-05	1.23904e-05	9.7969e-06	1.69744e-05	7.99236e-05
42	0.04894	0.05311	0.05355	0.041	0.02618	0.03608	0.02908	0.00941		42	0.046	0.0503	0.0496	0.0399	0.0307	0.0359	0.0323	0.0188		0.00294	0.00281	0.00395	0.0011	-0.00452	0.00018	-0.00322	-0.00939		8.6436e-06	7.8961e-06	1.56025e-05	1.21e-06	2.04304e-05	3.24e-08	1.03684e-05	8.81721e-05
42.2	0.04619	0.05396	0.05175	0.04185	0.03158	0.03663	0.03038	0.00876		42.2	0.0457	0.0496	0.0492	0.0398	0.0304	0.0358	0.0321	0.0189		0.00049	0.00436	0.00255	0.00205	0.00118	0.00083	-0.00172	-0.01014		2.401e-07	1.90096e-05	6.5025e-06	4.2025e-06	1.3924e-06	6.889e-07	2.9584e-06	0.00010282
42.4	0.04959	0.05606	0.0507	0.04045	0.02878	0.03888	0.03053	0.00996		42.4	0.0456	0.049	0.0489	0.0397	0.0302	0.0358	0.0316	0.0179		0.00399	0.00706	0.0018	0.00075	-0.00142	0.00308	-0.00107	-0.00794		1.59201e-05	4.98436e-05	3.24e-06	5.625e-07	2.0164e-06	9.4864e-06	1.1449e-06	6.30436e-05
42.6	0.04819	0.05531	0.05005	0.0381	0.02698	0.03883	0.03068	0.00851		42.6	0.0451	0.0487	0.0484	0.0398	0.0298	0.0357	0.0313	0.0169		0.00309	0.00661	0.00165	-0.0017	-0.00282	0.00313	-0.00062	-0.00839		9.5481e-06	4.36921e-05	2.7225e-06	2.89e-06	7.9524e-06	9.7969e-06	3.844e-07	7.03921e-05
42.8	0.04599	0.05246	0.0485	0.03855	0.02783	0.03848	0.03108	0.00956		42.8	0.0448	0.0483	0.048	0.0395	0.0294	0.0353	0.0314	0.0172		0.00119	0.00416	0.0005	-0.00095	-0.00157	0.00318	-0.00032	-0.00764		1.4161e-06	1.73056e-05	2.5e-07	9.025e-07	2.4649e-06	1.01124e-05	1.024e-07	5.83696e-05
43	0.04864	0.05051	0.0484	0.0369	0.02498	0.03823	0.02843	0.00856		43	0.0444	0.0481	0.0479	0.039	0.0291	0.0352	0.0313	0.0179		0.00424	0.00241	0.0005	-0.0021	-0.00412	0.00303	-0.00287	-0.00934		1.79776e-05	5.8081e-06	2.5e-07	4.41e-06	1.69744e-05	9.1809e-06	8.2369e-06	8.72356e-05
43.2	0.04649	0.05156	0.05035	0.03665	0.02758	0.03773	0.02968	0.00916		43.2	0.0439	0.0478	0.0478	0.0386	0.0288	0.0352	0.0314	0.0185		0.00259	0.00376	0.00255	-0.00195	-0.00122	0.00253	-0.00172	-0.00934		6.7081e-06	1.41376e-05	6.5025e-06	3.8025e-06	1.4884e-06	6.4009e-06	2.9584e-06	8.72356e-05
43.4	0.04749	0.05216	0.05365	0.036	0.02453	0.03543	0.02988	0.01016		43.4	0.0436	0.0475	0.0478	0.0383	0.0288	0.0349	0.0313	0.0183		0.00389	0.00466	0.00585	-0.0023	-0.00427	0.00053	-0.00142	-0.00814		1.51321e-05	2.17156e-05	3.42225e-05	5.29e-06	1.82329e-05	2.809e-07	2.0164e-06	6.62596e-05
43.6	0.04729	0.05231	0.0527	0.03435	0.02638	0.03433	0.02868	0.01291		43.6	0.0435	0.0471	0.0475	0.0381	0.0289	0.0344	0.0308	0.0176		0.00379	0.00521	0.0052	-0.00375	-0.00252	-7e-05	-0.00212	-0.00469		1.43641e-05	2.71441e-05	2.704e-05	1.40625e-05	6.3504e-06	4.9e-09	4.4944e-06	2.19961e-05
43.8	0.04729	0.05266	0.0528	0.03725	0.02298	0.03433	0.02828	0.01031		43.8	0.043	0.0469	0.0471	0.0379	0.029	0.034	0.0305	0.0169		0.00429	0.00576	0.0057	-0.00065	-0.00602	0.00033	-0.00222	-0.00659		1.84041e-05	3.31776e-05	3.249e-05	4.225e-07	3.62404e-05	1.089e-07	4.9284e-06	4.34281e-05
44	0.04649	0.05086	0.0493	0.03915	0.02158	0.03593	0.02783	0.00956		44	0.0428	0.0467	0.0467	0.0378	0.0289	0.0338	0.0305	0.0171		0.00369	0.00416	0.0026	0.00135	-0.00732	0.00213	-0.00267	-0.00754		1.36161e-05	1.73056e-05	6.76e-06	1.8225e-06	5.35824e-05	4.5369e-06	7.1289e-06	5.68516e-05
44.2	0.04674	0.05146	0.04805	0.03755	0.02343	0.03593	0.02998	0.00706		44.2	0.0427	0.0468	0.0464	0.0379	0.0287	0.0337	0.0305	0.0177		0.00404	0.00466	0.00165	-0.00035	-0.00527	0.00223	-0.00052	-0.01064		1.63216e-05	2.17156e-05	2.7225e-06	1.225e-07	2.77729e-05	4.9729e-06	2.704e-07	0.00011321
44.4	0.04719	0.05261	0.04565	0.03615	0.02563	0.03548	0.03133	0.00961		44.4	0.0425	0.0467	0.0462	0.0377	0.0283	0.0336	0.0304	0.0178		0.00469	0.00591	-0.00055	-0.00155	-0.00267	0.00188	0.00093	-0.00819		2.19961e-05	3.49281e-05	3.025e-07	2.4025e-06	7.1289e-06	3.5344e-06	8.649e-07	6.70761e-05
44.6	0.04729	0.05216	0.04615	0.0371	0.02828	0.03678	0.02868	0.00986		44.6	0.0425	0.0465	0.0464	0.0375	0.028	0.0335	0.0302	0.0177		0.00479	0.00566	-0.00025	-0.0004	0.00028	0.00328	-0.00152	-0.00784		2.29441e-05	3.20356e-05	6.25e-08	1.6e-07	7.84e-08	1.07584e-05	2.3104e-06	6.14656e-05
44.8	0.04609	0.04986	0.04985	0.0359	0.02888	0.03453	0.02768	0.01051		44.8	0.0424	0.0462	0.0463	0.0373	0.0276	0.0334	0.0299	0.0174		0.00369	0.00366	0.00355	-0.0014	0.00128	0.00113	-0.00222	-0.00689		1.36161e-05	1.33956e-05	1.26025e-05	1.96e-06	1.6384e-06	1.2769e-06	4.9284e-06	4.74721e-05
45	0.04699	0.04971	0.05325	0.0371	0.02798	0.03543	0.02808	0.01136		45	0.0422	0.0458	0.0462	0.0372	0.0274	0.0332	0.0295	0.0167		0.00479	0.00391	0.00705	-0.0001	0.00058	0.00223	-0.00142	-0.00534		2.29441e-05	1.52881e-05	4.97025e-05	1e-08	3.364e-07	4.9729e-06	2.0164e-06	2.85156e-05
45.2	0.04599	0.05076	0.0523	0.0377	0.02728	0.03353	0.02513	0.00841		45.2	0.0419	0.0459	0.0461	0.0371	0.0272	0.0333	0.0294	0.0166		0.00409	0.00486	0.0062	0.0006	8e-05	0.00023	-0.00427	-0.00819		1.67281e-05	2.36196e-05	3.844e-05	3.6e-07	6.4e-09	5.29e-08	1.82329e-05	6.70761e-05
45.4	0.04659	0.05291	0.0505	0.0341	0.02363	0.03453	0.02718	0.00736		45.4	0.0417	0.0459	0.046	0.0371	0.0271	0.0333	0.0293	0.017		0.00489	0.00701	0.0045	-0.003	-0.00347	0.00123	-0.00212	-0.00964		2.39121e-05	4.91401e-05	2.025e-05	9e-06	1.20409e-05	1.5129e-06	4.4944e-06	9.29296e-05
45.6	0.04589	0.05141	0.0507	0.03605	0.02418	0.03353	0.02683	0.00771		45.6	0.0417	0.0459	0.0459	0.0369	0.027	0.0332	0.0293	0.0175		0.00419	0.00551	0.0048	-0.00085	-0.00282	0.00033	-0.00247	-0.00979		1.75561e-05	3.03601e-05	2.304e-05	7.225e-07	7.9524e-06	1.089e-07	6.1009e-06	9.58441e-05
45.8	0.04404	0.05271	0.0466	0.0353	0.02283	0.03348	0.02963	0.00861		45.8	0.0417	0.0455	0.0458	0.0367	0.027	0.033	0.0292	0.0176		0.00234	0.00721	0.0008	-0.0014	-0.00417	0.00048	0.00043	-0.00899		5.4756e-06	5.19841e-05	6.4e-07	1.96e-06	1.73889e-05	2.304e-07	1.849e-07	8.08201e-05
46	0.04539	0.05376	0.04435	0.03335	0.02278	0.03633	0.02643	0.01136		46	0.0417	0.0454	0.0457	0.0365	0.0269	0.0327	0.0289	0.0176		0.00369	0.00836	-0.00135	-0.00315	-0.00412	0.00363	-0.00247	-0.00624		1.36161e-05	6.98896e-05	1.8225e-06	9.9225e-06	1.69744e-05	1.31769e-05	6.1009e-06	3.89376e-05
46.2	0.04674	0.05201	0.04465	0.0328	0.02378	0.03248	0.02758	0.00981		46.2	0.0417	0.0454	0.0455	0.0363	0.0269	0.0326	0.0287	0.0167		0.00504	0.00661	-0.00085	-0.0035	-0.00312	-0.00012	-0.00112	-0.00689		2.54016e-05	4.36921e-05	7.225e-07	1.225e-05	9.7344e-06	1.44e-08	1.2544e-06	4.74721e-05
46.4	0.04624	0.05291	0.04875	0.0358	0.02723	0.03363	0.03103	0.00736		46.4	0.0417	0.0455	0.0454	0.0362	0.0269	0.0325	0.0286	0.0162		0.00454	0.00741	0.00335	-0.0004	0.00033	0.00113	0.00243	-0.00884		2.06116e-05	5.49081e-05	1.12225e-05	1.6e-07	1.089e-07	1.2769e-06	5.9049e-06	7.81456e-05
46.6	0.04724	0.05141	0.0517	0.0466	0.02863	0.03508	0.02793	0.01066		46.6	0.0419	0.0458	0.0453	0.0363	0.0268	0.0324	0.0286	0.0164		0.00534	0.00561	0.0064	0.0103	0.00183	0.00268	-0.00067	-0.00574		2.85156e-05	3.14721e-05	4.096e-05	0.00010609	3.3489e-06	7.1824e-06	4.489e-07	3.29476e-05
46.8	0.04604	0.05051	0.0501	0.04465	0.02538	0.03683	0.02843	0.01001		46.8	0.0419	0.046	0.0456	0.0364	0.0267	0.0324	0.0286	0.017		0.00414	0.00451	0.0045	0.00825	-0.00132	0.00443	-0.00017	-0.00699		1.71396e-05	2.03401e-05	2.025e-05	6.80625e-05	1.7424e-06	1.96249e-05	2.89e-08	4.88601e-05
47	0.04504	0.05151	0.04935	0.0386	0.02493	0.03528	0.02653	0.00871		47	0.0421	0.0459	0.0458	0.0363	0.0265	0.0323	0.0287	0.0173		0.00294	0.00561	0.00355	0.0023	-0.00157	0.00298	-0.00217	-0.00859		8.6436e-06	3.14721e-05	1.26025e-05	5.29e-06	2.4649e-06	8.8804e-06	4.7089e-06	7.37881e-05
47.2	0.04474	0.05021	0.0471	0.03695	0.02658	0.03478	0.02498	0.00856		47.2	0.0421	0.0456	0.046	0.0362	0.0263	0.0321	0.0286	0.0172		0.00264	0.00461	0.0011	0.00075	0.00028	0.00268	-0.00362	-0.00864		6.9696e-06	2.12521e-05	1.21e-06	5.625e-07	7.84e-08	7.1824e-06	1.31044e-05	7.46496e-05
47.4	0.04339	0.05036	0.0447	0.03415	0.02898	0.03458	0.02648	0.00771		47.4	0.0419	0.045	0.046	0.0361	0.0262	0.032	0.0284	0.0167		0.00149	0.00536	-0.0013	-0.00195	0.00278	0.00258	-0.00192	-0.00899		2.2201e-06	2.87296e-05	1.69e-06	3.8025e-06	7.7284e-06	6.6564e-06	3.6864e-06	8.08201e-05
47.6	0.04449	0.04966	0.04425	0.03365	0.03108	0.03538	0.02823	0.00836		47.6	0.0417	0.0444	0.0457	0.036	0.0262	0.032	0.0282	0.0161		0.00279	0.00526	-0.00145	-0.00235	0.00488	0.00338	3e-05	-0.00774		7.7841e-06	2.76676e-05	2.1025e-06	5.5225e-06	2.38144e-05	1.14244e-05	9e-10	5.99076e-05
47.8	0.04344	0.05141	0.04425	0.03575	0.03043	0.03278	0.02813	0.00731		47.8	0.0413	0.0436	0.0454	0.036	0.0261	0.032	0.0282	0.0163		0.00214	0.00781	-0.00115	-0.00025	0.00433	0.00078	-7e-05	-0.00899		4.5796e-06	6.09961e-05	1.3225e-06	6.25e-08	1.87489e-05	6.084e-07	4.9e-09	8.08201e-05
48	0.04314	0.05241	0.04545	0.038	0.02963	0.03303	0.02708	0.00756		48	0.0407	0.0433	0.0451	0.036	0.0261	0.0319	0.0283	0.0169		0.00244	0.00911	0.00035	0.002	0.00353	0.00113	-0.00122	-0.00934		5.9536e-06	8.29921e-05	1.225e-07	4e-06	1.24609e-05	1.2769e-06	1.4884e-06	8.72356e-05
48.2	0.04269	0.04981	0.0487	0.0374	0.02923	0.03248	0.02798	0.00896		48.2	0.0402	0.0433	0.0446	0.0358	0.0261	0.0318	0.0282	0.0172		0.00249	0.00651	0.0041	0.0016	0.00313	0.00068	-0.00022	-0.00824		6.2001e-06	4.23801e-05	1.681e-05	2.56e-06	9.7969e-06	4.624e-07	4.84e-08	6.78976e-05
48.4	0.04459	0.05231	0.04615	0.0396	0.02468	0.03468	0.02628	0.00896		48.4	0.04	0.0436	0.0445	0.0356	0.026	0.0316	0.0282	0.0173		0.00459	0.00871	0.00165	0.004	-0.00132	0.00308	-0.00192	-0.00834		2.10681e-05	7.58641e-05	2.7225e-06	1.6e-05	1.7424e-06	9.4864e-06	3.6864e-06	6.95556e-05
48.6	0.04489	0.05211	0.04795	0.0353	0.02278	0.03363	0.02608	0.01151		48.6	0.04	0.0438	0.0443	0.0353	0.0259	0.0312	0.0278	0.017		0.00489	0.00831	0.00365	0	-0.00312	0.00243	-0.00172	-0.00549		2.39121e-05	6.90561e-05	1.33225e-05	0	9.7344e-06	5.9049e-06	2.9584e-06	3.01401e-05
48.8	0.04354	0.04961	0.0485	0.03385	0.02673	0.03263	0.02638	0.00766		48.8	0.0401	0.0438	0.0444	0.035	0.0258	0.031	0.0274	0.0164		0.00344	0.00581	0.0041	-0.00115	0.00093	0.00163	-0.00102	-0.00874		1.18336e-05	3.37561e-05	1.681e-05	1.3225e-06	8.649e-07	2.6569e-06	1.0404e-06	7.63876e-05
49	0.04274	0.05016	0.04595	0.03295	0.02728	0.03193	0.02558	0.00691		49	0.0403	0.0439	0.0444	0.035	0.0256	0.0308	0.0272	0.0159		0.00244	0.00626	0.00155	-0.00205	0.00168	0.00113	-0.00162	-0.00899		5.9536e-06	3.91876e-05	2.4025e-06	4.2025e-06	2.8224e-06	1.2769e-06	2.6244e-06	8.08201e-05
49.2	0.04394	0.05191	0.0443	0.03685	0.03073	0.03128	0.02598	0.00726		49.2	0.0402	0.0438	0.0444	0.0351	0.0253	0.0308	0.0271	0.0162		0.00374	0.00811	-0.0001	0.00175	0.00543	0.00048	-0.00112	-0.00894		1.39876e-05	6.57721e-05	1e-08	3.0625e-06	2.94849e-05	2.304e-07	1.2544e-06	7.99236e-05
49.4	0.04344	0.05251	0.0434	0.0367	0.02888	0.03313	0.02588	0.01131		49.4	0.0402	0.0435	0.0443	0.0353	0.0251	0.0309	0.0269	0.0166		0.00324	0.00901	-0.0009	0.0014	0.00378	0.00223	-0.00102	-0.00529		1.04976e-05	8.11801e-05	8.1e-07	1.96e-06	1.42884e-05	4.9729e-06	1.0404e-06	2.79841e-05
49.6	0.04304	0.05251	0.0433	0.0361	0.02738	0.03453	0.02753	0.01041		49.6	0.04	0.0433	0.0443	0.0355	0.0248	0.0311	0.0269	0.0168		0.00304	0.00921	-0.001	0.0006	0.00258	0.00343	0.00063	-0.00639		9.2416e-06	8.48241e-05	1e-06	3.6e-07	6.6564e-06	1.17649e-05	3.969e-07	4.08321e-05
49.8	0.04249	0.05171	0.04445	0.03975	0.02538	0.03398	0.02883	0.00971		49.8	0.0396	0.0431	0.0443	0.0355	0.0246	0.031	0.0269	0.0166		0.00289	0.00861	0.00015	0.00425	0.00078	0.00298	0.00193	-0.00689		8.3521e-06	7.41321e-05	2.25e-08	1.80625e-05	6.084e-07	8.8804e-06	3.7249e-06	4.74721e-05
50	0.04239	0.05001	0.045	0.0376	0.02483	0.03468	0.02748	0.00906		50	0.0392	0.043	0.0443	0.0353	0.0245	0.0309	0.0268	0.0161		0.00319	0.00701	0.0007	0.0023	0.00033	0.00378	0.00068	-0.00704		1.01761e-05	4.91401e-05	4.9e-07	5.29e-06	1.089e-07	1.42884e-05	4.624e-07	4.95616e-05
50.2	0.04259	0.05041	0.04595	0.0335	0.02613	0.03388	0.02698	0.00796		50.2	0.0388	0.043	0.0442	0.035	0.0243	0.0308	0.0267	0.0157		0.00379	0.00741	0.00175	-0.0015	0.00183	0.00308	0.00028	-0.00774		1.43641e-05	5.49081e-05	3.0625e-06	2.25e-06	3.3489e-06	9.4864e-06	7.84e-08	5.99076e-05
50.4	0.04254	0.04936	0.04655	0.0344	0.02563	0.03033	0.02438	0.00691		50.4	0.0384	0.0428	0.044	0.0347	0.0241	0.0307	0.0267	0.0159		0.00414	0.00656	0.00255	-0.0003	0.00153	-0.00037	-0.00232	-0.00899		1.71396e-05	4.30336e-05	6.5025e-06	9e-08	2.3409e-06	1.369e-07	5.3824e-06	8.08201e-05
50.6	0.04204	0.04721	0.0469	0.03245	0.02723	0.03223	0.02578	0.00696		50.6	0.0385	0.0431	0.0437	0.0344	0.024	0.0308	0.0266	0.0163		0.00354	0.00411	0.0032	-0.00195	0.00323	0.00143	-0.00082	-0.00934		1.25316e-05	1.68921e-05	1.024e-05	3.8025e-06	1.04329e-05	2.0449e-06	6.724e-07	8.72356e-05
50.8	0.04019	0.04906	0.0447	0.03315	0.02708	0.03233	0.02558	0.01161		50.8	0.0386	0.0431	0.0436	0.0342	0.0241	0.0307	0.0266	0.0165		0.00159	0.00596	0.0011	-0.00105	0.00298	0.00163	-0.00102	-0.00489		2.5281e-06	3.55216e-05	1.21e-06	1.1025e-06	8.8804e-06	2.6569e-06	1.0404e-06	2.39121e-05
51	0.04139	0.05221	0.0451	0.03345	0.02838	0.03128	0.02553	0.00841		51	0.0389	0.0428	0.0434	0.034	0.0242	0.0305	0.0266	0.0164		0.00249	0.00941	0.0017	-0.00055	0.00418	0.00078	-0.00107	-0.00799		6.2001e-06	8.85481e-05	2.89e-06	3.025e-07	1.74724e-05	6.084e-07	1.1449e-06	6.38401e-05
51.2	0.04239	0.05371	0.04835	0.03225	0.02573	0.03063	0.02433	0.00726		51.2	0.0392	0.0424	0.0431	0.0338	0.0245	0.0302	0.0263	0.0163		0.00319	0.01131	0.00525	-0.00155	0.00123	0.00043	-0.00197	-0.00904		1.01761e-05	0.000127916	2.75625e-05	2.4025e-06	1.5129e-06	1.849e-07	3.8809e-06	8.17216e-05
51.4	0.04139	0.05551	0.04905	0.03665	0.02133	0.03273	0.02803	0.00786		51.4	0.0392	0.042	0.0432	0.0338	0.0248	0.0299	0.0262	0.0159		0.00219	0.01351	0.00585	0.00285	-0.00347	0.00283	0.00183	-0.00804		4.7961e-06	0.00018252	3.42225e-05	8.1225e-06	1.20409e-05	8.0089e-06	3.3489e-06	6.46416e-05
51.6	0.04179	0.05151	0.04905	0.03475	0.02613	0.03153	0.02648	0.00711		51.6	0.0392	0.0418	0.043	0.0338	0.025	0.0296	0.0262	0.0156		0.00259	0.00971	0.00605	0.00095	0.00113	0.00193	0.00028	-0.00849		6.7081e-06	9.42841e-05	3.66025e-05	9.025e-07	1.2769e-06	3.7249e-06	7.84e-08	7.20801e-05
51.8	0.04184	0.05046	0.04605	0.03135	0.02563	0.03168	0.02643	0.01131		51.8	0.0391	0.0417	0.0429	0.0339	0.025	0.0295	0.0261	0.0157		0.00274	0.00876	0.00315	-0.00255	0.00063	0.00218	0.00033	-0.00439		7.5076e-06	7.67376e-05	9.9225e-06	6.5025e-06	3.969e-07	4.7524e-06	1.089e-07	1.92721e-05
52	0.04174	0.04981	0.0467	0.0337	0.02628	0.03248	0.02408	0.01006		52	0.0388	0.0419	0.0429	0.0341	0.0248	0.0295	0.0263	0.016		0.00294	0.00791	0.0038	-0.0004	0.00148	0.00298	-0.00222	-0.00594		8.6436e-06	6.25681e-05	1.444e-05	1.6e-07	2.1904e-06	8.8804e-06	4.9284e-06	3.52836e-05
52.2	0.04159	0.05051	0.0458	0.03215	0.02628	0.03213	0.02638	0.00931		52.2	0.0384	0.0422	0.0431	0.0341	0.0245	0.0296	0.0264	0.0162		0.00319	0.00831	0.0027	-0.00195	0.00178	0.00253	-2e-05	-0.00689		1.01761e-05	6.90561e-05	7.29e-06	3.8025e-06	3.1684e-06	6.4009e-06	4e-10	4.74721e-05
52.4	0.04234	0.04901	0.0442	0.03025	0.02803	0.03283	0.02643	0.00961		52.4	0.0383	0.0423	0.043	0.0338	0.024	0.0297	0.0263	0.0163		0.00404	0.00671	0.0012	-0.00355	0.00403	0.00313	0.00013	-0.00669		1.63216e-05	4.50241e-05	1.44e-06	1.26025e-05	1.62409e-05	9.7969e-06	1.69e-08	4.47561e-05
52.6	0.04139	0.04846	0.0439	0.0321	0.02723	0.03203	0.02578	0.00716		52.6	0.0384	0.0423	0.043	0.0336	0.0236	0.0299	0.0263	0.016		0.00299	0.00616	0.0009	-0.0015	0.00363	0.00213	-0.00052	-0.00884		8.9401e-06	3.79456e-05	8.1e-07	2.25e-06	1.31769e-05	4.5369e-06	2.704e-07	7.81456e-05
52.8	0.04189	0.04981	0.0443	0.0347	0.02803	0.03218	0.02773	0.00786		52.8	0.0385	0.0425	0.0431	0.0334	0.0234	0.03	0.0262	0.0158		0.00339	0.00731	0.0012	0.0013	0.00463	0.00218	0.00153	-0.00794		1.14921e-05	5.34361e-05	1.44e-06	1.69e-06	2.14369e-05	4.7524e-06	2.3409e-06	6.30436e-05
53	0.04054	0.04801	0.04655	0.0356	0.02718	0.03193	0.02558	0.01456		53	0.0386	0.0424	0.0431	0.0332	0.0233	0.03	0.026	0.0158		0.00194	0.00561	0.00345	0.0024	0.00388	0.00193	-0.00042	-0.00124		3.7636e-06	3.14721e-05	1.19025e-05	5.76e-06	1.50544e-05	3.7249e-06	1.764e-07	1.5376e-06
53.2	0.04124	0.04881	0.04805	0.0364	0.02553	0.03183	0.02553	0.01186		53.2	0.039	0.0423	0.0431	0.0332	0.0236	0.03	0.0259	0.016		0.00224	0.00651	0.00495	0.0032	0.00193	0.00183	-0.00037	-0.00414		5.0176e-06	4.23801e-05	2.45025e-05	1.024e-05	3.7249e-06	3.3489e-06	1.369e-07	1.71396e-05
53.4	0.04109	0.05056	0.046	0.0338	0.02408	0.03078	0.02488	0.01056		53.4	0.039	0.042	0.0431	0.0334	0.0239	0.0299	0.0258	0.0162		0.00209	0.00856	0.0029	0.0004	0.00018	0.00088	-0.00092	-0.00564		4.3681e-06	7.32736e-05	8.41e-06	1.6e-07	3.24e-08	7.744e-07	8.464e-07	3.18096e-05
53.6	0.03969	0.04791	0.0456	0.0334	0.02448	0.02938	0.02538	0.00836		53.6	0.0389	0.0417	0.0433	0.0336	0.0243	0.0296	0.0257	0.0164		0.00079	0.00621	0.0023	-0.0002	0.00018	-0.00022	-0.00032	-0.00804		6.241e-07	3.85641e-05	5.29e-06	4e-08	3.24e-08	4.84e-08	1.024e-07	6.46416e-05
53.8	0.04064	0.04806	0.0439	0.0344	0.02483	0.02958	0.02413	0.00651		53.8	0.0389	0.0417	0.0432	0.0336	0.0244	0.0294	0.0255	0.0163		0.00174	0.00636	0.0007	0.0008	0.00043	0.00018	-0.00137	-0.00979		3.0276e-06	4.04496e-05	4.9e-07	6.4e-07	1.849e-07	3.24e-08	1.8769e-06	9.58441e-05
54	0.04084	0.04751	0.04185	0.03395	0.02583	0.02893	0.02758	0.00726		54	0.0386	0.0421	0.0431	0.0338	0.0244	0.029	0.0255	0.016		0.00224	0.00541	-0.00125	0.00015	0.00143	-7e-05	0.00208	-0.00874		5.0176e-06	2.92681e-05	1.5625e-06	2.25e-08	2.0449e-06	4.9e-09	4.3264e-06	7.63876e-05
54.2	0.04159	0.04726	0.0421	0.034	0.02768	0.03103	0.02573	0.00611		54.2	0.0384	0.0422	0.0431	0.0336	0.0241	0.0288	0.0255	0.0156		0.00319	0.00506	-0.001	0.0004	0.00358	0.00223	0.00023	-0.00949		1.01761e-05	2.56036e-05	1e-06	1.6e-07	1.28164e-05	4.9729e-06	5.29e-08	9.00601e-05
54.4	0.04069	0.04511	0.04545	0.03155	0.02603	0.03038	0.02628	0.01371		54.4	0.0385	0.0423	0.043	0.0334	0.0237	0.0288	0.0255	0.0154		0.00219	0.00281	0.00245	-0.00185	0.00233	0.00158	0.00078	-0.00169		4.7961e-06	7.8961e-06	6.0025e-06	3.4225e-06	5.4289e-06	2.4964e-06	6.084e-07	2.8561e-06
54.6	0.04009	0.04501	0.045	0.0318	0.02658	0.02943	0.02558	0.01146		54.6	0.0384	0.0422	0.043	0.0334	0.0232	0.0289	0.0256	0.0155		0.00169	0.00281	0.002	-0.0016	0.00338	0.00053	-2e-05	-0.00404		2.8561e-06	7.8961e-06	4e-06	2.56e-06	1.14244e-05	2.809e-07	4e-10	1.63216e-05
54.8	0.04179	0.04626	0.0444	0.0348	0.02683	0.03263	0.02483	0.01091		54.8	0.0383	0.0422	0.0429	0.0333	0.0229	0.0292	0.0257	0.0156		0.00349	0.00406	0.0015	0.0015	0.00393	0.00343	-0.00087	-0.00469		1.21801e-05	1.64836e-05	2.25e-06	2.25e-06	1.54449e-05	1.17649e-05	7.569e-07	2.19961e-05
55	0.04049	0.04616	0.0447	0.03425	0.02593	0.03088	0.02518	0.00861		55	0.0384	0.0421	0.0425	0.0331	0.0228	0.0295	0.0256	0.016		0.00209	0.00406	0.0022	0.00115	0.00313	0.00138	-0.00042	-0.00739		4.3681e-06	1.64836e-05	4.84e-06	1.3225e-06	9.7969e-06	1.9044e-06	1.764e-07	5.46121e-05
55.2	0.04019	0.04836	0.0437	0.0363	0.02438	0.03133	0.02708	0.00791		55.2	0.0387	0.0419	0.0426	0.0332	0.023	0.0295	0.0254	0.0162		0.00149	0.00646	0.0011	0.0031	0.00138	0.00183	0.00168	-0.00829		2.2201e-06	4.17316e-05	1.21e-06	9.61e-06	1.9044e-06	3.3489e-06	2.8224e-06	6.87241e-05
55.4	0.03954	0.04836	0.04	0.03365	0.02603	0.03108	0.02533	0.00911		55.4	0.0386	0.0415	0.0427	0.0331	0.0234	0.0292	0.0251	0.0163		0.00094	0.00686	-0.0027	0.00055	0.00263	0.00188	0.00023	-0.00719		8.836e-07	4.70596e-05	7.29e-06	3.025e-07	6.9169e-06	3.5344e-06	5.29e-08	5.16961e-05
55.6	0.04109	0.04606	0.0408	0.03345	0.02588	0.03258	0.02628	0.00806		55.6	0.0387	0.0416	0.0426	0.033	0.0237	0.0289	0.0249	0.0162		0.00239	0.00446	-0.0018	0.00045	0.00218	0.00368	0.00138	-0.00814		5.7121e-06	1.98916e-05	3.24e-06	2.025e-07	4.7524e-06	1.35424e-05	1.9044e-06	6.62596e-05
55.8	0.03924	0.04586	0.0403	0.028	0.02653	0.03048	0.02703	0.01056		55.8	0.0386	0.0417	0.0425	0.0331	0.0239	0.0286	0.025	0.0161		0.00064	0.00416	-0.0022	-0.0051	0.00263	0.00188	0.00203	-0.00554		4.096e-07	1.73056e-05	4.84e-06	2.601e-05	6.9169e-06	3.5344e-06	4.1209e-06	3.06916e-05
56	0.04089	0.04686	0.04255	0.03015	0.02328	0.03063	0.02338	0.01326		56	0.0383	0.0418	0.0426	0.0333	0.024	0.0284	0.025	0.0159		0.00259	0.00506	-5e-05	-0.00315	-0.00072	0.00223	-0.00162	-0.00264		6.7081e-06	2.56036e-05	2.5e-09	9.9225e-06	5.184e-07	4.9729e-06	2.6244e-06	6.9696e-06
56.2	0.03964	0.04566	0.0474	0.0316	0.02688	0.03163	0.02453	0.01221		56.2	0.0381	0.0419	0.0426	0.0332	0.0238	0.0285	0.0249	0.0159		0.00154	0.00376	0.0048	-0.0016	0.00308	0.00313	-0.00037	-0.00369		2.3716e-06	1.41376e-05	2.304e-05	2.56e-06	9.4864e-06	9.7969e-06	1.369e-07	1.36161e-05
56.4	0.04044	0.04701	0.04665	0.03495	0.02383	0.03103	0.02658	0.00876		56.4	0.0381	0.042	0.0425	0.0334	0.0234	0.0286	0.0249	0.0159		0.00234	0.00501	0.00415	0.00155	0.00043	0.00243	0.00168	-0.00714		5.4756e-06	2.51001e-05	1.72225e-05	2.4025e-06	1.849e-07	5.9049e-06	2.8224e-06	5.09796e-05
56.6	0.03984	0.04766	0.0441	0.0367	0.02303	0.02678	0.02953	0.00726		56.6	0.038	0.0419	0.0425	0.0334	0.0231	0.0288	0.0249	0.0158		0.00184	0.00576	0.0016	0.0033	-7e-05	-0.00202	0.00463	-0.00854		3.3856e-06	3.31776e-05	2.56e-06	1.089e-05	4.9e-09	4.0804e-06	2.14369e-05	7.29316e-05
56.8	0.03959	0.04881	0.04155	0.03715	0.02368	0.03143	0.02478	0.00686		56.8	0.0379	0.0418	0.0424	0.0334	0.0228	0.029	0.0249	0.0155		0.00169	0.00701	-0.00085	0.00375	0.00088	0.00243	-0.00012	-0.00864		2.8561e-06	4.91401e-05	7.225e-07	1.40625e-05	7.744e-07	5.9049e-06	1.44e-08	7.46496e-05
57	0.03969	0.04786	0.04115	0.035	0.02653	0.03098	0.02458	0.00656		57	0.0378	0.0417	0.0424	0.0332	0.0226	0.0293	0.025	0.0152		0.00189	0.00616	-0.00125	0.0018	0.00393	0.00168	-0.00042	-0.00864		3.5721e-06	3.79456e-05	1.5625e-06	3.24e-06	1.54449e-05	2.8224e-06	1.764e-07	7.46496e-05
57.2	0.04039	0.04791	0.0403	0.03245	0.02473	0.03228	0.02583	0.01061		57.2	0.0378	0.0416	0.0424	0.0332	0.0225	0.0295	0.0251	0.0152		0.00259	0.00631	-0.0021	-0.00075	0.00223	0.00278	0.00073	-0.00459		6.7081e-06	3.98161e-05	4.41e-06	5.625e-07	4.9729e-06	7.7284e-06	5.329e-07	2.10681e-05
57.4	0.04034	0.04641	0.044	0.0335	0.02658	0.03008	0.02678	0.00926		57.4	0.0379	0.0417	0.0423	0.033	0.0227	0.0293	0.0251	0.0157		0.00244	0.00471	0.0017	0.0005	0.00388	0.00078	0.00168	-0.00644		5.9536e-06	2.21841e-05	2.89e-06	2.5e-07	1.50544e-05	6.084e-07	2.8224e-06	4.14736e-05
57.6	0.03999	0.04511	0.0445	0.0347	0.02628	0.03228	0.02723	0.00916		57.6	0.038	0.0417	0.0424	0.0329	0.023	0.0289	0.025	0.0163		0.00199	0.00341	0.0021	0.0018	0.00328	0.00338	0.00223	-0.00714		3.9601e-06	1.16281e-05	4.41e-06	3.24e-06	1.07584e-05	1.14244e-05	4.9729e-06	5.09796e-05
57.8	0.04029	0.04691	0.04435	0.03565	0.02483	0.03128	0.02218	0.00806		57.8	0.038	0.0416	0.0424	0.0326	0.0232	0.0284	0.0248	0.0167		0.00229	0.00531	0.00195	0.00305	0.00163	0.00288	-0.00262	-0.00864		5.2441e-06	2.81961e-05	3.8025e-06	9.3025e-06	2.6569e-06	8.2944e-06	6.8644e-06	7.46496e-05
58	0.03929	0.04796	0.0429	0.03775	0.02178	0.03178	0.02563	0.00641		58	0.038	0.0414	0.0424	0.0325	0.0234	0.028	0.0247	0.0165		0.00129	0.00656	0.0005	0.00525	-0.00162	0.00378	0.00093	-0.01009		1.6641e-06	4.30336e-05	2.5e-07	2.75625e-05	2.6244e-06	1.42884e-05	8.649e-07	0.000101808
58.2	0.03889	0.04771	0.04365	0.03545	0.02333	0.03128	0.02398	0.00636		58.2	0.0379	0.0416	0.0423	0.0324	0.0234	0.0278	0.0248	0.0159		0.00099	0.00611	0.00135	0.00305	-7e-05	0.00348	-0.00082	-0.00954		9.801e-07	3.73321e-05	1.8225e-06	9.3025e-06	4.9e-09	1.21104e-05	6.724e-07	9.10116e-05
58.4	0.03924	0.04696	0.0409	0.03015	0.02478	0.03193	0.02653	0.00866		58.4	0.0378	0.0416	0.0422	0.0325	0.0233	0.0278	0.0247	0.0151		0.00144	0.00536	-0.0013	-0.00235	0.00148	0.00413	0.00183	-0.00644		2.0736e-06	2.87296e-05	1.69e-06	5.5225e-06	2.1904e-06	1.70569e-05	3.3489e-06	4.14736e-05
58.6	0.04034	0.04641	0.0404	0.03315	0.02518	0.03053	0.02438	0.01056		58.6	0.0377	0.0417	0.0421	0.0326	0.0232	0.028	0.0247	0.0148		0.00264	0.00471	-0.0017	0.00055	0.00198	0.00253	-0.00032	-0.00424		6.9696e-06	2.21841e-05	2.89e-06	3.025e-07	3.9204e-06	6.4009e-06	1.024e-07	1.79776e-05
58.8	0.03974	0.04586	0.04215	0.03125	0.02648	0.03018	0.02423	0.00891		58.8	0.0376	0.0419	0.042	0.0328	0.0229	0.0285	0.0248	0.0149		0.00214	0.00396	0.00015	-0.00155	0.00358	0.00168	-0.00057	-0.00599		4.5796e-06	1.56816e-05	2.25e-08	2.4025e-06	1.28164e-05	2.8224e-06	3.249e-07	3.58801e-05
59										59	0.0377	0.0419	0.042	0.0329	0.0228	0.0288	0.0248	0.0153		-0.0377	-0.0419	-0.042	-0.0329	-0.0228	-0.0288	-0.0248	-0.0153		0.00142129	0.00175561	0.001764	0.00108241	0.00051984	0.00082944	0.00061504	0.00023409
59.2										59.2	0.0377	0.0416	0.042	0.033	0.0227	0.0289	0.0247	0.0158		-0.0377	-0.0416	-0.042	-0.033	-0.0227	-0.0289	-0.0247	-0.0158		0.00142129	0.00173056	0.001764	0.001089	0.00051529	0.00083521	0.00061009	0.00024964
59.4										59.4	0.0377	0.0413	0.0422	0.0327	0.0227	0.0288	0.0245	0.0159		-0.0377	-0.0413	-0.0422	-0.0327	-0.0227	-0.0288	-0.0245	-0.0159		0.00142129	0.00170569	0.00178084	0.00106929	0.00051529	0.00082944	0.00060025	0.00025281
59.6										59.6	0.0376	0.0411	0.0421	0.0325	0.0228	0.0285	0.0244	0.0159		-0.0376	-0.0411	-0.0421	-0.0325	-0.0228	-0.0285	-0.0244	-0.0159		0.00141376	0.00168921	0.00177241	0.00105625	0.00051984	0.00081225	0.00059536	0.00025281
59.8										59.8	0.0374	0.0408	0.0419	0.0325	0.023	0.0282	0.0245	0.0156		-0.0374	-0.0408	-0.0419	-0.0325	-0.023	-0.0282	-0.0245	-0.0156		0.00139876	0.00166464	0.00175561	0.00105625	0.000529	0.00079524	0.00060025	0.00024336
											0.0373	0.0407	0.0418	0.0324	0.0231	0.0279	0.0245	0.0154		-0.0373	-0.0407	-0.0418	-0.0324	-0.0231	-0.0279	-0.0245	-0.0154		0.00139129	0.00165649	0.00174724	0.00104976	0.00053361	0.00077841	0.00060025	0.00023716

## Sheet: RMSE_MeshSize0.2
t	S3	S4	S5	S6	S7	S8	S9	S10		t	HEC_1B_2_P3	HEC_1B_2_P4	HEC_1B_2_P5	HEC_1B_2_P6	HEC_1B_2_P7	HEC_1B_2_P8	HEC_1B_2_P9	HEC_1B_2_P10		Error_3	Error_4	Error_5	Error_6	Error_7	Error_8	Error_9	Error_10		Error^2_3	Error^2_4	Error^2_5	Error^2_6	Error^2_7	Error^2_8	Error^2_9	Error^2_10		RMSE_3	RMSE_4	RMSE_5	RMSE_6	RMSE_7	RMSE_8	RMSE_9	RMSE_10
0	-1e-05	-4e-05	0	-0.00015	-2e-05	-7e-05	3e-05	1e-05		0	0	0	0	0	0	0	0	0		-1e-05	-4e-05	0	-0.00015	-2e-05	-7e-05	3e-05	1e-05		1e-10	1.6e-09	0	2.25e-08	4e-10	4.9e-09	9e-10	1e-10		0.881941	1.0837	0.794968	0.650227	0.46924	0.535359	0.4241	0.714946
0.2	-6e-05	1e-05	-5e-05	0.00015	8e-05	0.00013	-0.00017	1e-05		0.2	0	0	0	0	0	0	0	0		-6e-05	1e-05	-5e-05	0.00015	8e-05	0.00013	-0.00017	1e-05		3.6e-09	1e-10	2.5e-09	2.25e-08	6.4e-09	1.69e-08	2.89e-08	1e-10
0.4	0.00014	0.00011	5e-05	5e-05	3e-05	3e-05	-2e-05	1e-05		0.4	0	0	0	0	0	0	0	0		0.00014	0.00011	5e-05	5e-05	3e-05	3e-05	-2e-05	1e-05		1.96e-08	1.21e-08	2.5e-09	2.5e-09	9e-10	9e-10	4e-10	1e-10
0.6	-1e-05	-9e-05	-0.0001	-5e-05	-7e-05	8e-05	-2e-05	-4e-05		0.6	0	0	0	0	0	0	0	0		-1e-05	-9e-05	-0.0001	-5e-05	-7e-05	8e-05	-2e-05	-4e-05		1e-10	8.1e-09	1e-08	2.5e-09	4.9e-09	6.4e-09	4e-10	1.6e-09
0.8	-0.00016	-4e-05	5e-05	-5e-05	-0.00012	8e-05	-2e-05	6e-05		0.8	0	0	0	0	0	0	0	0		-0.00016	-4e-05	5e-05	-5e-05	-0.00012	8e-05	-2e-05	6e-05		2.56e-08	1.6e-09	2.5e-09	2.5e-09	1.44e-08	6.4e-09	4e-10	3.6e-09
1	4e-05	1e-05	0.00015	-0.00015	-0.00017	0.00018	-7e-05	1e-05		1	0	0	0	0	0	0	0	0		4e-05	1e-05	0.00015	-0.00015	-0.00017	0.00018	-7e-05	1e-05		1.6e-09	1e-10	2.25e-08	2.25e-08	2.89e-08	3.24e-08	4.9e-09	1e-10
1.2	-6e-05	0.00011	-0.0001	0.0002	0.00013	8e-05	-2e-05	-4e-05		1.2	0	0	0	0	0	0	0	0		-6e-05	0.00011	-0.0001	0.0002	0.00013	8e-05	-2e-05	-4e-05		3.6e-09	1.21e-08	1e-08	4e-08	1.69e-08	6.4e-09	4e-10	1.6e-09
1.4	0.00039	-9e-05	0.00015	0	0.00013	0.00033	-7e-05	-4e-05		1.4	0	0	0	0	0	0	0	0		0.00039	-9e-05	0.00015	0	0.00013	0.00033	-7e-05	-4e-05		1.521e-07	8.1e-09	2.25e-08	0	1.69e-08	1.089e-07	4.9e-09	1.6e-09
1.6	-6e-05	1e-05	5e-05	-5e-05	8e-05	3e-05	-2e-05	-4e-05		1.6	0	0	0	0	0	0	0	0		-6e-05	1e-05	5e-05	-5e-05	8e-05	3e-05	-2e-05	-4e-05		3.6e-09	1e-10	2.5e-09	2.5e-09	6.4e-09	9e-10	4e-10	1.6e-09
1.8	-0.00016	1e-05	0.0001	-5e-05	-2e-05	-2e-05	3e-05	-4e-05		1.8	0	0	0	0	0	0	0	0		-0.00016	1e-05	0.0001	-5e-05	-2e-05	-2e-05	3e-05	-4e-05		2.56e-08	1e-10	1e-08	2.5e-09	4e-10	4e-10	9e-10	1.6e-09
2	9e-05	0.00011	0	-0.00015	-2e-05	-7e-05	3e-05	1e-05		2	0	0	0	0	0	0	0	0		9e-05	0.00011	0	-0.00015	-2e-05	-7e-05	3e-05	1e-05		8.1e-09	1.21e-08	0	2.25e-08	4e-10	4.9e-09	9e-10	1e-10
2.2	-1e-05	-0.00014	0	0.00015	8e-05	-0.00017	3e-05	6e-05		2.2	0	0	0	0	0	0	0	0		-1e-05	-0.00014	0	0.00015	8e-05	-0.00017	3e-05	6e-05		1e-10	1.96e-08	0	2.25e-08	6.4e-09	2.89e-08	9e-10	3.6e-09
2.4	9e-05	1e-05	-0.00015	0	-2e-05	-7e-05	8e-05	6e-05		2.4	0	0	0	0	0	0	0	0		9e-05	1e-05	-0.00015	0	-2e-05	-7e-05	8e-05	6e-05		8.1e-09	1e-10	2.25e-08	0	4e-10	4.9e-09	6.4e-09	3.6e-09
2.6	-6e-05	1e-05	5e-05	0	-7e-05	-0.00022	8e-05	0.00011		2.6	0	0	0	0	0	0	0	0		-6e-05	1e-05	5e-05	0	-7e-05	-0.00022	8e-05	0.00011		3.6e-09	1e-10	2.5e-09	0	4.9e-09	4.84e-08	6.4e-09	1.21e-08
2.8	-0.00016	0.00011	-0.0001	-5e-05	-0.00012	-0.00012	0.00013	0.00011		2.8	0	0	0	0	0	0	0	0		-0.00016	0.00011	-0.0001	-5e-05	-0.00012	-0.00012	0.00013	0.00011		2.56e-08	1.21e-08	1e-08	2.5e-09	1.44e-08	1.44e-08	1.69e-08	1.21e-08
3	4e-05	-9e-05	0	-0.00015	-0.00012	-0.00017	0.00013	0.00011		3	0	0	0	0	0	0	0	0		4e-05	-9e-05	0	-0.00015	-0.00012	-0.00017	0.00013	0.00011		1.6e-09	8.1e-09	0	2.25e-08	1.44e-08	2.89e-08	1.69e-08	1.21e-08
3.2	-1e-05	-4e-05	-0.0001	0.00015	0.00023	-7e-05	0.00028	0.00011		3.2	0	0	0	0	0	0	0	0		-1e-05	-4e-05	-0.0001	0.00015	0.00023	-7e-05	0.00028	0.00011		1e-10	1.6e-09	1e-08	2.25e-08	5.29e-08	4.9e-09	7.84e-08	1.21e-08
3.4	-0.00011	-4e-05	0.0001	0	0.00013	-0.00017	3e-05	0.00036		3.4	0	0	0	0	0	0	0	0		-0.00011	-4e-05	0.0001	0	0.00013	-0.00017	3e-05	0.00036		1.21e-08	1.6e-09	1e-08	0	1.69e-08	2.89e-08	9e-10	1.296e-07
3.6	-6e-05	0.00011	0.0001	0	-2e-05	-7e-05	-0.00012	0.00011		3.6	0	0	0	0	0	0	0	0		-6e-05	0.00011	0.0001	0	-2e-05	-7e-05	-0.00012	0.00011		3.6e-09	1.21e-08	1e-08	0	4e-10	4.9e-09	1.44e-08	1.21e-08
3.8	-0.00011	-9e-05	0	-0.0001	-2e-05	-0.00017	-0.00012	1e-05		3.8	0	0	0	0	0	0	0	0		-0.00011	-9e-05	0	-0.0001	-2e-05	-0.00017	-0.00012	1e-05		1.21e-08	8.1e-09	0	1e-08	4e-10	2.89e-08	1.44e-08	1e-10
4	9e-05	6e-05	0.0003	-0.0002	-2e-05	-7e-05	-0.00022	-9e-05		4	0	0	0	0	0	0	0	0		9e-05	6e-05	0.0003	-0.0002	-2e-05	-7e-05	-0.00022	-9e-05		8.1e-09	3.6e-09	9e-08	4e-08	4e-10	4.9e-09	4.84e-08	8.1e-09
4.2	-6e-05	1e-05	-5e-05	0.0001	3e-05	-0.00017	-0.00012	-0.00014		4.2	0	0	0	0	0	0	0	0		-6e-05	1e-05	-5e-05	0.0001	3e-05	-0.00017	-0.00012	-0.00014		3.6e-09	1e-10	2.5e-09	1e-08	9e-10	2.89e-08	1.44e-08	1.96e-08
4.4	-0.00016	0.00011	0.00015	0	-2e-05	3e-05	-0.00012	-0.00014		4.4	0	0	0	0	0	0	0	0		-0.00016	0.00011	0.00015	0	-2e-05	3e-05	-0.00012	-0.00014		2.56e-08	1.21e-08	2.25e-08	0	4e-10	9e-10	1.44e-08	1.96e-08
4.6	-6e-05	-0.00014	-5e-05	-0.0001	-7e-05	-0.00012	-7e-05	-0.00014		4.6	0	0	0	0	0	0	0	0		-6e-05	-0.00014	-5e-05	-0.0001	-7e-05	-0.00012	-7e-05	-0.00014		3.6e-09	1.96e-08	2.5e-09	1e-08	4.9e-09	1.44e-08	4.9e-09	1.96e-08
4.8	-0.00011	1e-05	0.0001	-0.0001	-0.00017	3e-05	-0.00012	-0.00014		4.8	0	0	0	0	0	0	0	0		-0.00011	1e-05	0.0001	-0.0001	-0.00017	3e-05	-0.00012	-0.00014		1.21e-08	1e-10	1e-08	1e-08	2.89e-08	9e-10	1.44e-08	1.96e-08
5	9e-05	1e-05	-0.0001	-0.0002	-7e-05	-7e-05	-0.00012	-0.00014		5	0	0	0	0	0	0	0	0		9e-05	1e-05	-0.0001	-0.0002	-7e-05	-7e-05	-0.00012	-0.00014		8.1e-09	1e-10	1e-08	4e-08	4.9e-09	4.9e-09	1.44e-08	1.96e-08
5.2	-1e-05	0.00016	5e-05	0.0001	0.00013	3e-05	-7e-05	-9e-05		5.2	0	0	0	0	0	0	0	0		-1e-05	0.00016	5e-05	0.0001	0.00013	3e-05	-7e-05	-9e-05		1e-10	2.56e-08	2.5e-09	1e-08	1.69e-08	9e-10	4.9e-09	8.1e-09
5.4	-0.00021	-0.00014	-0.0001	-5e-05	0.00013	-7e-05	-2e-05	-9e-05		5.4	0	0	0	0	0	0	0	0		-0.00021	-0.00014	-0.0001	-5e-05	0.00013	-7e-05	-2e-05	-9e-05		4.41e-08	1.96e-08	1e-08	2.5e-09	1.69e-08	4.9e-09	4e-10	8.1e-09
5.6	-1e-05	1e-05	0	0	3e-05	8e-05	-2e-05	-4e-05		5.6	0	0	0	0	0	0	0	0		-1e-05	1e-05	0	0	3e-05	8e-05	-2e-05	-4e-05		1e-10	1e-10	0	0	9e-10	6.4e-09	4e-10	1.6e-09
5.8	-6e-05	1e-05	-0.00015	-0.0001	-2e-05	-2e-05	3e-05	-4e-05		5.8	0	0	0	0	0	0	0	0		-6e-05	1e-05	-0.00015	-0.0001	-2e-05	-2e-05	3e-05	-4e-05		3.6e-09	1e-10	2.25e-08	1e-08	4e-10	4e-10	9e-10	1.6e-09
6	9e-05	0.00011	5e-05	-0.00015	-2e-05	0.00028	-2e-05	1e-05		6	0	0	0	0	0	0	0	0		9e-05	0.00011	5e-05	-0.00015	-2e-05	0.00028	-2e-05	1e-05		8.1e-09	1.21e-08	2.5e-09	2.25e-08	4e-10	7.84e-08	4e-10	1e-10
6.2	4e-05	-9e-05	5e-05	5e-05	3e-05	-7e-05	-7e-05	-4e-05		6.2	0	0	0	0	0	0	0	0		4e-05	-9e-05	5e-05	5e-05	3e-05	-7e-05	-7e-05	-4e-05		1.6e-09	8.1e-09	2.5e-09	2.5e-09	9e-10	4.9e-09	4.9e-09	1.6e-09
6.4	-0.00016	1e-05	0.0001	-5e-05	-7e-05	-2e-05	3e-05	-9e-05		6.4	0	0	0	0	0	0	0	0		-0.00016	1e-05	0.0001	-5e-05	-7e-05	-2e-05	3e-05	-9e-05		2.56e-08	1e-10	1e-08	2.5e-09	4.9e-09	4e-10	9e-10	8.1e-09
6.6	4e-05	1e-05	0.00035	0	-7e-05	-7e-05	-7e-05	6e-05		6.6	0	0	0	0	0	0	0	0		4e-05	1e-05	0.00035	0	-7e-05	-7e-05	-7e-05	6e-05		1.6e-09	1e-10	1.225e-07	0	4.9e-09	4.9e-09	4.9e-09	3.6e-09
6.8	-0.00011	0.00011	0	-0.0001	-0.00012	-0.00022	-7e-05	-4e-05		6.8	0	0	0	0	0	0	0	0		-0.00011	0.00011	0	-0.0001	-0.00012	-0.00022	-7e-05	-4e-05		1.21e-08	1.21e-08	0	1e-08	1.44e-08	4.84e-08	4.9e-09	1.6e-09
7	9e-05	-9e-05	0.00015	-5e-05	-2e-05	-0.00017	-7e-05	-4e-05		7	0	0	0	0	0	0	0	0		9e-05	-9e-05	0.00015	-5e-05	-2e-05	-0.00017	-7e-05	-4e-05		8.1e-09	8.1e-09	2.25e-08	2.5e-09	4e-10	2.89e-08	4.9e-09	1.6e-09
7.2	-6e-05	1e-05	0	5e-05	0.00013	-0.00022	-7e-05	1e-05		7.2	0	0	0	0	0	0	0	0		-6e-05	1e-05	0	5e-05	0.00013	-0.00022	-7e-05	1e-05		3.6e-09	1e-10	0	2.5e-09	1.69e-08	4.84e-08	4.9e-09	1e-10
7.4	-0.00016	1e-05	5e-05	-5e-05	8e-05	-0.00012	-2e-05	-4e-05		7.4	0	0	0	0	0	0	0	0		-0.00016	1e-05	5e-05	-5e-05	8e-05	-0.00012	-2e-05	-4e-05		2.56e-08	1e-10	2.5e-09	2.5e-09	6.4e-09	1.44e-08	4e-10	1.6e-09
7.6	-1e-05	0.00016	-0.0001	0	3e-05	-0.00022	-2e-05	1e-05		7.6	0	0	0	0	0	0	0	0		-1e-05	0.00016	-0.0001	0	3e-05	-0.00022	-2e-05	1e-05		1e-10	2.56e-08	1e-08	0	9e-10	4.84e-08	4e-10	1e-10
7.8	-0.00011	-9e-05	5e-05	-0.00015	-2e-05	-7e-05	-2e-05	1e-05		7.8	0	0	0	0	0	0	0	0		-0.00011	-9e-05	5e-05	-0.00015	-2e-05	-7e-05	-2e-05	1e-05		1.21e-08	8.1e-09	2.5e-09	2.25e-08	4e-10	4.9e-09	4e-10	1e-10
8	0.00029	1e-05	-0.00015	0.00015	3e-05	-0.00022	-2e-05	1e-05		8	0	0	0	0	0	0	0	0		0.00029	1e-05	-0.00015	0.00015	3e-05	-0.00022	-2e-05	1e-05		8.41e-08	1e-10	2.25e-08	2.25e-08	9e-10	4.84e-08	4e-10	1e-10
8.2	-0.00011	1e-05	0	0.0001	-2e-05	-7e-05	3e-05	1e-05		8.2	0	0	0	0	0	0	0	0		-0.00011	1e-05	0	0.0001	-2e-05	-7e-05	3e-05	1e-05		1.21e-08	1e-10	0	1e-08	4e-10	4.9e-09	9e-10	1e-10
8.4	-0.00016	0.00021	-0.0002	-5e-05	-2e-05	-0.00022	3e-05	6e-05		8.4	0	0	0	0	0	0	0	0		-0.00016	0.00021	-0.0002	-5e-05	-2e-05	-0.00022	3e-05	6e-05		2.56e-08	4.41e-08	4e-08	2.5e-09	4e-10	4.84e-08	9e-10	3.6e-09
8.6	-1e-05	-0.00014	5e-05	-5e-05	-0.00012	3e-05	8e-05	0.00011		8.6	0	0	0	0	0	0	0	0		-1e-05	-0.00014	5e-05	-5e-05	-0.00012	3e-05	8e-05	0.00011		1e-10	1.96e-08	2.5e-09	2.5e-09	1.44e-08	9e-10	6.4e-09	1.21e-08
8.8	-6e-05	-4e-05	-5e-05	-0.00015	-0.00017	-0.00017	8e-05	6e-05		8.8	0	0	0	0	0	0	0	0		-6e-05	-4e-05	-5e-05	-0.00015	-0.00017	-0.00017	8e-05	6e-05		3.6e-09	1.6e-09	2.5e-09	2.25e-08	2.89e-08	2.89e-08	6.4e-09	3.6e-09
9	4e-05	1e-05	5e-05	0.00025	3e-05	-2e-05	0.00028	0.00011		9	0	0	0	0	0	0	0	0		4e-05	1e-05	5e-05	0.00025	3e-05	-2e-05	0.00028	0.00011		1.6e-09	1e-10	2.5e-09	6.25e-08	9e-10	4e-10	7.84e-08	1.21e-08
9.2	-0.00011	0.00031	0.00035	5e-05	8e-05	-0.00012	3e-05	0.00016		9.2	0	0	0	0	0	0	0	0		-0.00011	0.00031	0.00035	5e-05	8e-05	-0.00012	3e-05	0.00016		1.21e-08	9.61e-08	1.225e-07	2.5e-09	6.4e-09	1.44e-08	9e-10	2.56e-08
9.4	-0.00016	-0.00014	-5e-05	-5e-05	3e-05	-2e-05	-7e-05	0.00016		9.4	0	0	0	0	0	0	0	0		-0.00016	-0.00014	-5e-05	-5e-05	3e-05	-2e-05	-7e-05	0.00016		2.56e-08	1.96e-08	2.5e-09	2.5e-09	9e-10	4e-10	4.9e-09	2.56e-08
9.6	4e-05	-0.00024	0.0001	-5e-05	-2e-05	-0.00012	-0.00017	6e-05		9.6	0	0	0	0	0	0	0	0		4e-05	-0.00024	0.0001	-5e-05	-2e-05	-0.00012	-0.00017	6e-05		1.6e-09	5.76e-08	1e-08	2.5e-09	4e-10	1.44e-08	2.89e-08	3.6e-09
9.8	-1e-05	1e-05	-5e-05	-0.00015	-7e-05	8e-05	-0.00012	-0.00014		9.8	0	0	0	0	0	0	0	0		-1e-05	1e-05	-5e-05	-0.00015	-7e-05	8e-05	-0.00012	-0.00014		1e-10	1e-10	2.5e-09	2.25e-08	4.9e-09	6.4e-09	1.44e-08	1.96e-08
10	-0.00011	0.00041	0	0.0001	3e-05	-7e-05	-0.00017	-0.00019		10	0	0	0	0	0	0	0	0		-0.00011	0.00041	0	0.0001	3e-05	-7e-05	-0.00017	-0.00019		1.21e-08	1.681e-07	0	1e-08	9e-10	4.9e-09	2.89e-08	3.61e-08
10.2	-0.00011	-4e-05	-0.0001	-5e-05	-2e-05	0.00023	-0.00017	-0.00019		10.2	0	0	0	0	0	0	0	0		-0.00011	-4e-05	-0.0001	-5e-05	-2e-05	0.00023	-0.00017	-0.00019		1.21e-08	1.6e-09	1e-08	2.5e-09	4e-10	5.29e-08	2.89e-08	3.61e-08
10.4	-0.00016	-0.00024	5e-05	-5e-05	-2e-05	-0.00012	-0.00017	-0.00014		10.4	0	0	0	0	0	0	0	0		-0.00016	-0.00024	5e-05	-5e-05	-2e-05	-0.00012	-0.00017	-0.00014		2.56e-08	5.76e-08	2.5e-09	2.5e-09	4e-10	1.44e-08	2.89e-08	1.96e-08
10.6	4e-05	1e-05	-0.00015	-5e-05	-0.00012	-0.00012	-0.00012	-0.00019		10.6	0	0	0	0	0	0	0	0		4e-05	1e-05	-0.00015	-5e-05	-0.00012	-0.00012	-0.00012	-0.00019		1.6e-09	1e-10	2.25e-08	2.5e-09	1.44e-08	1.44e-08	1.44e-08	3.61e-08
10.8	-6e-05	0.00066	-5e-05	-0.0002	-0.00017	-0.00017	-0.00012	-0.00014		10.8	0	0	0	0	0	0	0	0		-6e-05	0.00066	-5e-05	-0.0002	-0.00017	-0.00017	-0.00012	-0.00014		3.6e-09	4.356e-07	2.5e-09	4e-08	2.89e-08	2.89e-08	1.44e-08	1.96e-08
11	-0.00016	0.01081	-0.00015	0.0001	0.00013	-0.00027	-7e-05	-0.00014		11	0	0	0	0	0	0	0	0		-0.00016	0.01081	-0.00015	0.0001	0.00013	-0.00027	-7e-05	-0.00014		2.56e-08	0.000116856	2.25e-08	1e-08	1.69e-08	7.29e-08	4.9e-09	1.96e-08
11.2	0.00204	0.01051	5e-05	0	8e-05	-0.00012	-7e-05	-9e-05		11.2	0	0	0	0	0	0	0	0		0.00204	0.01051	5e-05	0	8e-05	-0.00012	-7e-05	-9e-05		4.1616e-06	0.00011046	2.5e-09	0	6.4e-09	1.44e-08	4.9e-09	8.1e-09
11.4	0.00929	0.01211	0.00365	0	3e-05	-0.00032	-7e-05	-9e-05		11.4	0	0	0	0	0	0	0	0		0.00929	0.01211	0.00365	0	3e-05	-0.00032	-7e-05	-9e-05		8.63041e-05	0.000146652	1.33225e-05	0	9e-10	1.024e-07	4.9e-09	8.1e-09
11.6	0.01154	0.01786	0.01275	-0.0001	3e-05	-0.00017	-2e-05	-4e-05		11.6	0	0.0392	0	0	0	0	0	0		0.01154	-0.02134	0.01275	-0.0001	3e-05	-0.00017	-2e-05	-4e-05		0.000133172	0.000455396	0.000162562	1e-08	9e-10	2.89e-08	4e-10	1.6e-09
11.8	0.01224	0.02656	0.01795	-0.0002	-0.00012	-0.00027	-2e-05	-4e-05		11.8	0.0339	0.0735	0	0	0	0	0	0		-0.02166	-0.04694	0.01795	-0.0002	-0.00012	-0.00027	-2e-05	-4e-05		0.000469156	0.00220336	0.000322203	4e-08	1.44e-08	7.29e-08	4e-10	1.6e-09
12	0.01389	0.03236	0.0167	0.0028	-0.00012	-0.00017	-0.00017	-4e-05		12	0.0369	0.0715	0	0	0	0	0	0		-0.02301	-0.03914	0.0167	0.0028	-0.00012	-0.00017	-0.00017	-4e-05		0.00052946	0.00153194	0.00027889	7.84e-06	1.44e-08	2.89e-08	2.89e-08	1.6e-09
12.2	0.01684	0.03216	0.01835	0.00595	-7e-05	-0.00022	-2e-05	-0.00019		12.2	0.0533	0.0677	0.03	0	0	0	0	0		-0.03646	-0.03554	-0.01165	0.00595	-7e-05	-0.00022	-2e-05	-0.00019		0.00132933	0.00126309	0.000135722	3.54025e-05	4.9e-09	4.84e-08	4e-10	3.61e-08
12.4	0.01794	0.03646	0.0221	0.00635	0.00508	0.00563	-7e-05	1e-05		12.4	0.0494	0.0615	0.0688	0	0	0	0	0		-0.03146	-0.02504	-0.0467	0.00635	0.00508	0.00563	-7e-05	1e-05		0.000989732	0.000627002	0.00218089	4.03225e-05	2.58064e-05	3.16969e-05	4.9e-09	1e-10
12.6	0.01994	0.03596	0.0244	0.0134	0.00718	0.01163	-7e-05	1e-05		12.6	0.0535	0.0638	0.045	0	0	0	0	0		-0.03356	-0.02784	-0.0206	0.0134	0.00718	0.01163	-7e-05	1e-05		0.00112627	0.000775066	0.00042436	0.00017956	5.15524e-05	0.000135257	4.9e-09	1e-10
12.8	0.02579	0.04336	0.0287	0.01565	0.00888	0.01123	-7e-05	-4e-05		12.8	0.0547	0.0715	0.0453	0.0209	0	0	0	0		-0.02891	-0.02814	-0.0166	-0.00525	0.00888	0.01123	-7e-05	-4e-05		0.000835788	0.00079186	0.00027556	2.75625e-05	7.88544e-05	0.000126113	4.9e-09	1.6e-09
13	0.03714	0.05026	0.03785	0.01655	0.00933	0.02568	0.00263	-4e-05		13	0.057	0.0767	0.0513	0.0168	0	0.0135	0	0		-0.01986	-0.02644	-0.01345	-0.00025	0.00933	0.01218	0.00263	-4e-05		0.00039442	0.000699074	0.000180902	6.25e-08	8.70489e-05	0.000148352	6.9169e-06	1.6e-09
13.2	0.04459	0.05761	0.0466	0.01715	0.00873	0.03688	0.00498	-4e-05		13.2	0.0596	0.0787	0.065	0.0292	0.0126	0.0301	0	0		-0.01501	-0.02109	-0.0184	-0.01205	-0.00387	0.00678	0.00498	-4e-05		0.0002253	0.000444788	0.00033856	0.000145203	1.49769e-05	4.59684e-05	2.48004e-05	1.6e-09
13.4	0.04989	0.06971	0.0498	0.02405	0.01243	0.03593	0.00293	-4e-05		13.4	0.0608	0.0795	0.0659	0.0328	0.0106	0.0272	0.0081	0		-0.01091	-0.00979	-0.0161	-0.00875	0.00183	0.00873	-0.00517	-4e-05		0.000119028	9.58441e-05	0.00025921	7.65625e-05	3.3489e-06	7.62129e-05	2.67289e-05	1.6e-09
13.6	0.06959	0.07761	0.0514	0.02615	0.01448	0.03508	0.00383	0.00116		13.6	0.0617	0.0809	0.066	0.0331	0.0144	0.0336	0.007	0		0.00789	-0.00329	-0.0146	-0.00695	8e-05	0.00148	-0.00317	0.00116		6.22521e-05	1.08241e-05	0.00021316	4.83025e-05	6.4e-09	2.1904e-06	1.00489e-05	1.3456e-06
13.8	0.07604	0.09786	0.0611	0.0335	0.01423	0.03808	0.00793	0.00371		13.8	0.0614	0.0805	0.0657	0.0365	0.0172	0.0376	0.0085	0		0.01464	0.01736	-0.0046	-0.003	-0.00297	0.00048	-0.00057	0.00371		0.00021433	0.00030137	2.116e-05	9e-06	8.8209e-06	2.304e-07	3.249e-07	1.37641e-05
14	0.07349	0.09986	0.0654	0.03585	0.01748	0.04083	0.01478	0.00296		14	0.0643	0.0824	0.067	0.0398	0.0311	0.0361	0.013	0		0.00919	0.01746	-0.0016	-0.00395	-0.01362	0.00473	0.00178	0.00296		8.44561e-05	0.000304852	2.56e-06	1.56025e-05	0.000185504	2.23729e-05	3.1684e-06	8.7616e-06
14.2	0.07234	0.09626	0.0739	0.0494	0.01353	0.03683	0.01713	0.00521		14.2	0.066	0.082	0.0681	0.0406	0.0318	0.0368	0.0204	0		0.00634	0.01426	0.0058	0.0088	-0.01827	3e-05	-0.00327	0.00521		4.01956e-05	0.000203348	3.364e-05	7.744e-05	0.000333793	9e-10	1.06929e-05	2.71441e-05
14.4	0.07174	0.07411	0.0755	0.05075	0.01613	0.03723	0.01978	0.01086		14.4	0.0674	0.082	0.0697	0.0526	0.0319	0.0373	0.0263	0.0093		0.00434	-0.00789	0.0058	-0.00185	-0.01577	-7e-05	-0.00652	0.00156		1.88356e-05	6.22521e-05	3.364e-05	3.4225e-06	0.000248693	4.9e-09	4.25104e-05	2.4336e-06
14.6	0.06834	0.06826	0.077	0.0545	0.02118	0.03538	0.02338	0.01176		14.6	0.0689	0.082	0.072	0.0499	0.0327	0.04	0.0289	0.0227		-0.00056	-0.01374	0.005	0.0046	-0.01152	-0.00462	-0.00552	-0.01094		3.136e-07	0.000188788	2.5e-05	2.116e-05	0.00013271	2.13444e-05	3.04704e-05	0.000119684
14.8	0.06979	0.06686	0.071	0.05585	0.02933	0.04408	0.01983	0.00971		14.8	0.0691	0.0832	0.0724	0.05	0.0336	0.0417	0.0308	0.0187		0.00069	-0.01634	-0.0014	0.00585	-0.00427	0.00238	-0.01097	-0.00899		4.761e-07	0.000266996	1.96e-06	3.42225e-05	1.82329e-05	5.6644e-06	0.000120341	8.08201e-05
15	0.06729	0.05431	0.0706	0.05295	0.02458	0.04708	0.02123	0.00966		15	0.0683	0.0826	0.0731	0.0519	0.0334	0.0425	0.0331	0.017		-0.00101	-0.02829	-0.0025	0.00105	-0.00882	0.00458	-0.01187	-0.00734		1.0201e-06	0.000800324	6.25e-06	1.1025e-06	7.77924e-05	2.09764e-05	0.000140897	5.38756e-05
15.2	0.05639	0.06126	0.0714	0.05065	0.02568	0.04873	0.02823	0.01201		15.2	0.0684	0.0836	0.0738	0.0502	0.0337	0.0442	0.034	0.0168		-0.01201	-0.02234	-0.0024	0.00045	-0.00802	0.00453	-0.00577	-0.00479		0.00014424	0.000499076	5.76e-06	2.025e-07	6.43204e-05	2.05209e-05	3.32929e-05	2.29441e-05
15.4	0.05179	0.05901	0.07695	0.0519	0.02878	0.04558	0.02578	0.01696		15.4	0.0674	0.0843	0.0743	0.05	0.0342	0.0458	0.035	0.0187		-0.01561	-0.02529	0.00265	0.0019	-0.00542	-0.00022	-0.00922	-0.00174		0.000243672	0.000639584	7.0225e-06	3.61e-06	2.93764e-05	4.84e-08	8.50084e-05	3.0276e-06
15.6	0.04294	0.05846	0.07595	0.06815	0.03343	0.04438	0.02938	0.01666		15.6	0.0679	0.0838	0.0736	0.0495	0.0356	0.0462	0.0369	0.021		-0.02496	-0.02534	0.00235	0.01865	-0.00217	-0.00182	-0.00752	-0.00434		0.000623002	0.000642116	5.5225e-06	0.000347822	4.7089e-06	3.3124e-06	5.65504e-05	1.88356e-05
15.8	0.05719	0.06526	0.0763	0.06585	0.03823	0.04713	0.02868	0.01861		15.8	0.0693	0.0838	0.0731	0.0492	0.0369	0.0457	0.0372	0.0222		-0.01211	-0.01854	0.0032	0.01665	0.00133	0.00143	-0.00852	-0.00359		0.000146652	0.000343732	1.024e-05	0.000277223	1.7689e-06	2.0449e-06	7.25904e-05	1.28881e-05
16	0.05904	0.06071	0.0817	0.0582	0.03218	0.05343	0.03658	0.01636		16	0.0718	0.0837	0.0729	0.0504	0.0399	0.0459	0.0387	0.0214		-0.01276	-0.02299	0.0088	0.0078	-0.00772	0.00753	-0.00212	-0.00504		0.000162818	0.00052854	7.744e-05	6.084e-05	5.95984e-05	5.67009e-05	4.4944e-06	2.54016e-05
16.2	0.06914	0.06146	0.0814	0.06375	0.02833	0.05068	0.03503	0.02056		16.2	0.0725	0.0839	0.0735	0.0525	0.0409	0.0467	0.0395	0.0215		-0.00336	-0.02244	0.0079	0.01125	-0.01257	0.00398	-0.00447	-0.00094		1.12896e-05	0.000503554	6.241e-05	0.000126563	0.000158005	1.58404e-05	1.99809e-05	8.836e-07
16.4	0.06989	0.07661	0.0782	0.05895	0.03993	0.05153	0.03643	0.01381		16.4	0.0721	0.0846	0.0743	0.054	0.042	0.0484	0.0404	0.022		-0.00221	-0.00799	0.0039	0.00495	-0.00207	0.00313	-0.00397	-0.00819		4.8841e-06	6.38401e-05	1.521e-05	2.45025e-05	4.2849e-06	9.7969e-06	1.57609e-05	6.70761e-05
16.6	0.07379	0.06681	0.082	0.0592	0.04083	0.05138	0.03693	0.01701		16.6	0.0725	0.0861	0.0754	0.0553	0.0425	0.0505	0.0426	0.0225		0.00129	-0.01929	0.0066	0.0039	-0.00167	0.00088	-0.00567	-0.00549		1.6641e-06	0.000372104	4.356e-05	1.521e-05	2.7889e-06	7.744e-07	3.21489e-05	3.01401e-05
16.8	0.07604	0.08126	0.07955	0.06915	0.04373	0.05268	0.03763	0.02261		16.8	0.0727	0.0873	0.0762	0.0566	0.0432	0.0515	0.0438	0.0228		0.00334	-0.00604	0.00335	0.01255	0.00053	0.00118	-0.00617	-0.00019		1.11556e-05	3.64816e-05	1.12225e-05	0.000157503	2.809e-07	1.3924e-06	3.80689e-05	3.61e-08
17	0.07794	0.07866	0.0755	0.06865	0.04203	0.05548	0.04463	0.02211		17	0.0727	0.0871	0.0764	0.0577	0.0434	0.0517	0.0448	0.023		0.00524	-0.00844	-0.0009	0.01095	-0.00137	0.00378	-0.00017	-0.00089		2.74576e-05	7.12336e-05	8.1e-07	0.000119903	1.8769e-06	1.42884e-05	2.89e-08	7.921e-07
17.2	0.07469	0.07716	0.08105	0.06565	0.03713	0.05258	0.04333	0.01911		17.2	0.0731	0.0869	0.0763	0.0584	0.0438	0.0525	0.045	0.0227		0.00159	-0.00974	0.00475	0.00725	-0.00667	8e-05	-0.00167	-0.00359		2.5281e-06	9.48676e-05	2.25625e-05	5.25625e-05	4.44889e-05	6.4e-09	2.7889e-06	1.28881e-05
17.4	0.07719	0.07941	0.082	0.06695	0.04623	0.05003	0.04313	0.01546		17.4	0.0736	0.0861	0.0763	0.0593	0.0446	0.0535	0.0453	0.0231		0.00359	-0.00669	0.0057	0.00765	0.00163	-0.00347	-0.00217	-0.00764		1.28881e-05	4.47561e-05	3.249e-05	5.85225e-05	2.6569e-06	1.20409e-05	4.7089e-06	5.83696e-05
17.6	0.07644	0.08206	0.08045	0.06735	0.04683	0.05058	0.04453	0.02236		17.6	0.0745	0.086	0.0761	0.0598	0.0454	0.0537	0.0459	0.0235		0.00194	-0.00394	0.00435	0.00755	0.00143	-0.00312	-0.00137	-0.00114		3.7636e-06	1.55236e-05	1.89225e-05	5.70025e-05	2.0449e-06	9.7344e-06	1.8769e-06	1.2996e-06
17.8	0.07539	0.08211	0.07425	0.06775	0.04773	0.05263	0.04663	0.02091		17.8	0.0741	0.0864	0.0761	0.0598	0.0463	0.0531	0.0464	0.0241		0.00129	-0.00429	-0.00185	0.00795	0.00143	-0.00047	0.00023	-0.00319		1.6641e-06	1.84041e-05	3.4225e-06	6.32025e-05	2.0449e-06	2.209e-07	5.29e-08	1.01761e-05
18	0.07459	0.07896	0.0725	0.0722	0.04173	0.05813	0.04513	0.01526		18	0.074	0.0856	0.0771	0.0591	0.0464	0.0522	0.0468	0.024		0.00059	-0.00664	-0.0046	0.0131	-0.00467	0.00593	-0.00167	-0.00874		3.481e-07	4.40896e-05	2.116e-05	0.00017161	2.18089e-05	3.51649e-05	2.7889e-06	7.63876e-05
18.2	0.07589	0.07516	0.0737	0.06995	0.04483	0.06038	0.04253	0.01886		18.2	0.074	0.0851	0.0781	0.0585	0.0462	0.0516	0.0465	0.0239		0.00189	-0.00994	-0.0044	0.01145	-0.00137	0.00878	-0.00397	-0.00504		3.5721e-06	9.88036e-05	1.936e-05	0.000131102	1.8769e-06	7.70884e-05	1.57609e-05	2.54016e-05
18.4	0.07639	0.07616	0.07315	0.06665	0.04868	0.05143	0.04403	0.01781		18.4	0.073	0.0854	0.077	0.0586	0.0461	0.0521	0.0463	0.0241		0.00339	-0.00924	-0.00385	0.00805	0.00258	-0.00067	-0.00227	-0.00629		1.14921e-05	8.53776e-05	1.48225e-05	6.48025e-05	6.6564e-06	4.489e-07	5.1529e-06	3.95641e-05
18.6	0.07719	0.07821	0.0766	0.0661	0.04678	0.05363	0.05088	0.01821		18.6	0.073	0.0851	0.0761	0.0593	0.0459	0.0529	0.0467	0.0243		0.00419	-0.00689	0.0005	0.0068	0.00088	0.00073	0.00418	-0.00609		1.75561e-05	4.74721e-05	2.5e-07	4.624e-05	7.744e-07	5.329e-07	1.74724e-05	3.70881e-05
18.8	0.07559	0.07751	0.07355	0.0696	0.04058	0.05628	0.04728	0.02026		18.8	0.0727	0.0844	0.0764	0.06	0.0457	0.0532	0.047	0.0242		0.00289	-0.00689	-0.00285	0.0096	-0.00512	0.00308	0.00028	-0.00394		8.3521e-06	4.74721e-05	8.1225e-06	9.216e-05	2.62144e-05	9.4864e-06	7.84e-08	1.55236e-05
19	0.07604	0.07886	0.075	0.066	0.04123	0.05663	0.04368	0.01861		19	0.0719	0.0825	0.076	0.0604	0.0458	0.0533	0.0475	0.0246		0.00414	-0.00364	-0.001	0.0056	-0.00457	0.00333	-0.00382	-0.00599		1.71396e-05	1.32496e-05	1e-06	3.136e-05	2.08849e-05	1.10889e-05	1.45924e-05	3.58801e-05
19.2	0.07449	0.07701	0.07315	0.0656	0.04068	0.05543	0.04853	0.01326		19.2	0.0713	0.0803	0.0751	0.0605	0.0462	0.0531	0.0473	0.0246		0.00319	-0.00329	-0.00195	0.0051	-0.00552	0.00233	0.00123	-0.01134		1.01761e-05	1.08241e-05	3.8025e-06	2.601e-05	3.04704e-05	5.4289e-06	1.5129e-06	0.000128596
19.4	0.07524	0.08196	0.06975	0.06485	0.04548	0.04843	0.04173	0.01371		19.4	0.0705	0.0786	0.0742	0.0603	0.0466	0.0528	0.0468	0.0247		0.00474	0.00336	-0.00445	0.00455	-0.00112	-0.00437	-0.00507	-0.01099		2.24676e-05	1.12896e-05	1.98025e-05	2.07025e-05	1.2544e-06	1.90969e-05	2.57049e-05	0.00012078
19.6	0.07454	0.08271	0.0712	0.07045	0.04978	0.04818	0.04498	0.01971		19.6	0.07	0.0773	0.0734	0.0595	0.0463	0.0523	0.0466	0.0245		0.00454	0.00541	-0.0022	0.01095	0.00348	-0.00412	-0.00162	-0.00479		2.06116e-05	2.92681e-05	4.84e-06	0.000119903	1.21104e-05	1.69744e-05	2.6244e-06	2.29441e-05
19.8	0.07154	0.07421	0.07345	0.0698	0.04628	0.05408	0.04433	0.02181		19.8	0.0689	0.0763	0.0731	0.0584	0.0455	0.0515	0.0462	0.0244		0.00264	-0.00209	0.00035	0.0114	0.00078	0.00258	-0.00187	-0.00259		6.9696e-06	4.3681e-06	1.225e-07	0.00012996	6.084e-07	6.6564e-06	3.4969e-06	6.7081e-06
20	0.07534	0.07441	0.0734	0.0655	0.04163	0.05608	0.04308	0.01561		20	0.0678	0.0757	0.0723	0.0575	0.0448	0.0512	0.046	0.0243		0.00754	-0.00129	0.0011	0.008	-0.00317	0.00488	-0.00292	-0.00869		5.68516e-05	1.6641e-06	1.21e-06	6.4e-05	1.00489e-05	2.38144e-05	8.5264e-06	7.55161e-05
20.2	0.07239	0.07361	0.0747	0.0646	0.04013	0.05683	0.04483	0.01146		20.2	0.0675	0.074	0.0715	0.0573	0.0442	0.0512	0.046	0.0243		0.00489	-0.00039	0.0032	0.0073	-0.00407	0.00563	-0.00117	-0.01284		2.39121e-05	1.521e-07	1.024e-05	5.329e-05	1.65649e-05	3.16969e-05	1.3689e-06	0.000164866
20.4	0.07379	0.06721	0.0711	0.05895	0.04153	0.05318	0.04933	0.01681		20.4	0.0667	0.0724	0.0704	0.0572	0.0437	0.0514	0.0457	0.0241		0.00709	-0.00519	0.0007	0.00175	-0.00217	0.00178	0.00363	-0.00729		5.02681e-05	2.69361e-05	4.9e-07	3.0625e-06	4.7089e-06	3.1684e-06	1.31769e-05	5.31441e-05
20.6	0.07119	0.07326	0.06915	0.0593	0.04378	0.05418	0.05028	0.02081		20.6	0.0652	0.071	0.0691	0.0568	0.043	0.0519	0.0456	0.0241		0.00599	0.00226	5e-05	0.0025	0.00078	0.00228	0.00468	-0.00329		3.58801e-05	5.1076e-06	2.5e-09	6.25e-06	6.084e-07	5.1984e-06	2.19024e-05	1.08241e-05
20.8	0.06954	0.06861	0.067	0.06415	0.04213	0.04708	0.04323	0.02661		20.8	0.0644	0.0694	0.0682	0.0563	0.0426	0.0515	0.0455	0.0238		0.00514	-0.00079	-0.0012	0.00785	-0.00047	-0.00442	-0.00227	0.00281		2.64196e-05	6.241e-07	1.44e-06	6.16225e-05	2.209e-07	1.95364e-05	5.1529e-06	7.8961e-06
21	0.07104	0.06891	0.0694	0.0638	0.03858	0.04653	0.04183	0.01881		21	0.0632	0.0676	0.0673	0.0557	0.0426	0.0505	0.045	0.0241		0.00784	0.00131	0.0021	0.0081	-0.00402	-0.00397	-0.00317	-0.00529		6.14656e-05	1.7161e-06	4.41e-06	6.561e-05	1.61604e-05	1.57609e-05	1.00489e-05	2.79841e-05
21.2	0.06999	0.07491	0.0691	0.0642	0.03958	0.05513	0.03598	0.01566		21.2	0.0621	0.0668	0.066	0.055	0.0427	0.0493	0.0447	0.0242		0.00789	0.00811	0.0031	0.0092	-0.00312	0.00583	-0.00872	-0.00854		6.22521e-05	6.57721e-05	9.61e-06	8.464e-05	9.7344e-06	3.39889e-05	7.60384e-05	7.29316e-05
21.4	0.07214	0.07586	0.07055	0.06075	0.03943	0.05383	0.04308	0.01196		21.4	0.0606	0.0668	0.0648	0.0542	0.0425	0.0483	0.0443	0.0242		0.01154	0.00906	0.00575	0.00655	-0.00307	0.00553	-0.00122	-0.01224		0.000133172	8.20836e-05	3.30625e-05	4.29025e-05	9.4249e-06	3.05809e-05	1.4884e-06	0.000149818
21.6	0.06904	0.07771	0.06605	0.06015	0.04333	0.05838	0.04688	0.02446		21.6	0.0605	0.0662	0.0645	0.0533	0.0418	0.0478	0.0437	0.0236		0.00854	0.01151	0.00155	0.00685	0.00153	0.01058	0.00318	0.00086		7.29316e-05	0.00013248	2.4025e-06	4.69225e-05	2.3409e-06	0.000111936	1.01124e-05	7.396e-07
21.8	0.07029	0.07616	0.06255	0.0651	0.04113	0.06003	0.03923	0.02151		21.8	0.0604	0.0661	0.0644	0.0527	0.0409	0.0478	0.0432	0.0231		0.00989	0.01006	-0.00185	0.0124	0.00023	0.01223	-0.00397	-0.00159		9.78121e-05	0.000101204	3.4225e-06	0.00015376	5.29e-08	0.000149573	1.57609e-05	2.5281e-06
22	0.07089	0.07106	0.06435	0.0636	0.04313	0.05838	0.04068	0.01936		22	0.0599	0.0656	0.0639	0.0524	0.0399	0.0478	0.0427	0.0231		0.01099	0.00546	0.00045	0.0112	0.00323	0.01058	-0.00202	-0.00374		0.00012078	2.98116e-05	2.025e-07	0.00012544	1.04329e-05	0.000111936	4.0804e-06	1.39876e-05
22.2	0.06834	0.07046	0.066	0.0598	0.04088	0.05353	0.04358	0.01711		22.2	0.0597	0.0651	0.0631	0.0524	0.0391	0.0479	0.0422	0.023		0.00864	0.00536	0.0029	0.0074	0.00178	0.00563	0.00138	-0.00589		7.46496e-05	2.87296e-05	8.41e-06	5.476e-05	3.1684e-06	3.16969e-05	1.9044e-06	3.46921e-05
22.4	0.06949	0.06626	0.0657	0.05925	0.04278	0.05308	0.04333	0.01441		22.4	0.0593	0.0646	0.0626	0.0522	0.0385	0.0476	0.042	0.0229		0.01019	0.00166	0.0031	0.00705	0.00428	0.00548	0.00133	-0.00849		0.000103836	2.7556e-06	9.61e-06	4.97025e-05	1.83184e-05	3.00304e-05	1.7689e-06	7.20801e-05
22.6	0.07089	0.06746	0.06935	0.05665	0.03878	0.05078	0.04423	0.02361		22.6	0.0586	0.0648	0.0627	0.0517	0.0382	0.0469	0.0414	0.0226		0.01229	0.00266	0.00665	0.00495	0.00058	0.00388	0.00283	0.00101		0.000151044	7.0756e-06	4.42225e-05	2.45025e-05	3.364e-07	1.50544e-05	8.0089e-06	1.0201e-06
22.8	0.06644	0.07401	0.0648	0.0571	0.04023	0.05058	0.04053	0.01746		22.8	0.0587	0.0649	0.0626	0.051	0.0381	0.0462	0.0411	0.0227		0.00774	0.00911	0.0022	0.0061	0.00213	0.00438	-0.00057	-0.00524		5.99076e-05	8.29921e-05	4.84e-06	3.721e-05	4.5369e-06	1.91844e-05	3.249e-07	2.74576e-05
23	0.06524	0.07656	0.0654	0.05625	0.03798	0.05318	0.04303	0.01061		23	0.059	0.0649	0.0625	0.0507	0.0377	0.0457	0.0406	0.0224		0.00624	0.01166	0.0029	0.00555	0.00028	0.00748	0.00243	-0.01179		3.89376e-05	0.000135956	8.41e-06	3.08025e-05	7.84e-08	5.59504e-05	5.9049e-06	0.000139004
23.2	0.06684	0.06801	0.0666	0.05545	0.03818	0.05503	0.04333	0.01031		23.2	0.0596	0.0658	0.0625	0.0506	0.0377	0.0456	0.0404	0.0224		0.00724	0.00221	0.0041	0.00485	0.00048	0.00943	0.00293	-0.01209		5.24176e-05	4.8841e-06	1.681e-05	2.35225e-05	2.304e-07	8.89249e-05	8.5849e-06	0.000146168
23.4	0.06749	0.06561	0.0653	0.05875	0.03633	0.05293	0.04268	0.02256		23.4	0.0598	0.0687	0.0626	0.0506	0.0376	0.0454	0.0402	0.0221		0.00769	-0.00309	0.0027	0.00815	-0.00127	0.00753	0.00248	0.00046		5.91361e-05	9.5481e-06	7.29e-06	6.64225e-05	1.6129e-06	5.67009e-05	6.1504e-06	2.116e-07
23.6	0.06504	0.07021	0.06115	0.0582	0.03853	0.05563	0.04208	0.02041		23.6	0.0612	0.0718	0.0641	0.0506	0.0375	0.0451	0.0401	0.0224		0.00384	-0.00159	-0.00295	0.0076	0.00103	0.01053	0.00198	-0.00199		1.47456e-05	2.5281e-06	8.7025e-06	5.776e-05	1.0609e-06	0.000110881	3.9204e-06	3.9601e-06
23.8	0.06874	0.07411	0.06305	0.0586	0.04158	0.05278	0.04243	0.01661		23.8	0.0628	0.0736	0.0669	0.0508	0.0373	0.0449	0.0401	0.0223		0.00594	0.00051	-0.00385	0.0078	0.00428	0.00788	0.00233	-0.00569		3.52836e-05	2.601e-07	1.48225e-05	6.084e-05	1.83184e-05	6.20944e-05	5.4289e-06	3.23761e-05
24	0.06689	0.06471	0.06545	0.05555	0.04188	0.05123	0.03843	0.00986		24	0.064	0.0734	0.0697	0.0512	0.0372	0.0449	0.0397	0.022		0.00289	-0.00869	-0.00425	0.00435	0.00468	0.00633	-0.00127	-0.01214		8.3521e-06	7.55161e-05	1.80625e-05	1.89225e-05	2.19024e-05	4.00689e-05	1.6129e-06	0.00014738
24.2	0.06409	0.06531	0.06645	0.0547	0.03703	0.04948	0.04063	0.01856		24.2	0.0649	0.0719	0.0702	0.0522	0.0374	0.0459	0.0393	0.0219		-0.00081	-0.00659	-0.00375	0.0025	-0.00037	0.00358	0.00133	-0.00334		6.561e-07	4.34281e-05	1.40625e-05	6.25e-06	1.369e-07	1.28164e-05	1.7689e-06	1.11556e-05
24.4	0.06729	0.06831	0.06305	0.06185	0.03923	0.04773	0.04248	0.02091		24.4	0.0653	0.0703	0.0696	0.0535	0.038	0.0471	0.0396	0.0218		0.00199	-0.00199	-0.00655	0.00835	0.00123	0.00063	0.00288	-0.00089		3.9601e-06	3.9601e-06	4.29025e-05	6.97225e-05	1.5129e-06	3.969e-07	8.2944e-06	7.921e-07
24.6	0.06259	0.06556	0.06345	0.05655	0.03968	0.04873	0.04198	0.01986		24.6	0.065	0.069	0.0694	0.0541	0.0384	0.0475	0.04	0.0218		-0.00241	-0.00344	-0.00595	0.00245	0.00128	0.00123	0.00198	-0.00194		5.8081e-06	1.18336e-05	3.54025e-05	6.0025e-06	1.6384e-06	1.5129e-06	3.9204e-06	3.7636e-06
24.8	0.06304	0.06886	0.064	0.0549	0.04048	0.05008	0.03963	0.01441		24.8	0.0643	0.0683	0.0689	0.0535	0.0384	0.0472	0.0403	0.0223		-0.00126	0.00056	-0.0049	0.0014	0.00208	0.00288	-0.00067	-0.00789		1.5876e-06	3.136e-07	2.401e-05	1.96e-06	4.3264e-06	8.2944e-06	4.489e-07	6.22521e-05
25	0.06314	0.06851	0.06165	0.05555	0.04273	0.04753	0.03973	0.01156		25	0.0644	0.0681	0.0681	0.0531	0.0385	0.0469	0.0408	0.0225		-0.00126	0.00041	-0.00645	0.00245	0.00423	0.00063	-0.00107	-0.01094		1.5876e-06	1.681e-07	4.16025e-05	6.0025e-06	1.78929e-05	3.969e-07	1.1449e-06	0.000119684
25.2	0.06334	0.06691	0.06295	0.0543	0.04158	0.04593	0.04303	0.01546		25.2	0.0649	0.0673	0.067	0.053	0.039	0.0469	0.041	0.0225		-0.00156	-0.00039	-0.00405	0.0013	0.00258	-0.00097	0.00203	-0.00704		2.4336e-06	1.521e-07	1.64025e-05	1.69e-06	6.6564e-06	9.409e-07	4.1209e-06	4.95616e-05
25.4	0.06584	0.06811	0.0639	0.0556	0.03848	0.04703	0.03958	0.01661		25.4	0.0645	0.0663	0.0659	0.0532	0.0397	0.0471	0.0412	0.0226		0.00134	0.00181	-0.002	0.0024	-0.00122	-7e-05	-0.00162	-0.00599		1.7956e-06	3.2761e-06	4e-06	5.76e-06	1.4884e-06	4.9e-09	2.6244e-06	3.58801e-05
25.6	0.06379	0.06956	0.06485	0.0544	0.03748	0.04748	0.03928	0.01271		25.6	0.0634	0.0655	0.0657	0.0534	0.0401	0.0471	0.0414	0.0233		0.00039	0.00406	-0.00085	0.001	-0.00262	0.00038	-0.00212	-0.01059		1.521e-07	1.64836e-05	7.225e-07	1e-06	6.8644e-06	1.444e-07	4.4944e-06	0.000112148
25.8	0.06579	0.07061	0.06335	0.0578	0.03753	0.05143	0.04078	0.00901		25.8	0.0619	0.0656	0.0661	0.0533	0.04	0.0468	0.0416	0.0234		0.00389	0.00501	-0.00275	0.0045	-0.00247	0.00463	-0.00082	-0.01439		1.51321e-05	2.51001e-05	7.5625e-06	2.025e-05	6.1009e-06	2.14369e-05	6.724e-07	0.000207072
26	0.06299	0.07181	0.05995	0.05645	0.03908	0.04698	0.03908	0.01261		26	0.0602	0.0657	0.066	0.0531	0.0398	0.0467	0.0415	0.0233		0.00279	0.00611	-0.00605	0.00335	-0.00072	0.00028	-0.00242	-0.01069		7.7841e-06	3.73321e-05	3.66025e-05	1.12225e-05	5.184e-07	7.84e-08	5.8564e-06	0.000114276
26.2	0.06134	0.06631	0.0583	0.0556	0.04018	0.05188	0.04173	0.02541		26.2	0.0588	0.066	0.0649	0.0528	0.0392	0.0468	0.0416	0.0232		0.00254	0.00031	-0.0066	0.0028	0.00098	0.00508	0.00013	0.00221		6.4516e-06	9.61e-08	4.356e-05	7.84e-06	9.604e-07	2.58064e-05	1.69e-08	4.8841e-06
26.4	0.06489	0.06786	0.0603	0.0546	0.03793	0.05023	0.04013	0.02116		26.4	0.058	0.066	0.064	0.0522	0.0382	0.0474	0.0416	0.0229		0.00689	0.00186	-0.0037	0.0024	-0.00027	0.00283	-0.00147	-0.00174		4.74721e-05	3.4596e-06	1.369e-05	5.76e-06	7.29e-08	8.0089e-06	2.1609e-06	3.0276e-06
26.6	0.06294	0.06696	0.06205	0.0532	0.03788	0.04638	0.04148	0.01801		26.6	0.0579	0.0652	0.0637	0.0514	0.0372	0.0477	0.0414	0.0231		0.00504	0.00176	-0.00165	0.0018	0.00068	-0.00132	8e-05	-0.00509		2.54016e-05	3.0976e-06	2.7225e-06	3.24e-06	4.624e-07	1.7424e-06	6.4e-09	2.59081e-05
26.8	0.06299	0.06601	0.064	0.055	0.03958	0.04783	0.03673	0.01386		26.8	0.0573	0.0641	0.0629	0.0509	0.0366	0.0478	0.0409	0.023		0.00569	0.00191	0.0011	0.0041	0.00298	3e-05	-0.00417	-0.00914		3.23761e-05	3.6481e-06	1.21e-06	1.681e-05	8.8804e-06	9e-10	1.73889e-05	8.35396e-05
27	0.06019	0.06451	0.0634	0.05575	0.03518	0.05033	0.03768	0.01056		27	0.0568	0.0634	0.0613	0.0509	0.0368	0.0475	0.0405	0.0229		0.00339	0.00111	0.0021	0.00485	-0.00162	0.00283	-0.00282	-0.01234		1.14921e-05	1.2321e-06	4.41e-06	2.35225e-05	2.6244e-06	8.0089e-06	7.9524e-06	0.000152276
27.2	0.06329	0.06651	0.06065	0.0565	0.03548	0.04803	0.03853	0.01131		27.2	0.0564	0.0631	0.0599	0.0509	0.0374	0.0468	0.0403	0.0228		0.00689	0.00341	0.00075	0.0056	-0.00192	0.00123	-0.00177	-0.01149		4.74721e-05	1.16281e-05	5.625e-07	3.136e-05	3.6864e-06	1.5129e-06	3.1329e-06	0.00013202
27.4	0.06294	0.07146	0.059	0.05265	0.04243	0.04448	0.04033	0.02361		27.4	0.056	0.0629	0.0592	0.0505	0.0378	0.0461	0.0404	0.0227		0.00694	0.00856	-0.0002	0.00215	0.00463	-0.00162	-7e-05	0.00091		4.81636e-05	7.32736e-05	4e-08	4.6225e-06	2.14369e-05	2.6244e-06	4.9e-09	8.281e-07
27.6	0.06299	0.06906	0.057	0.0579	0.04318	0.04998	0.04143	0.02091		27.6	0.0555	0.0627	0.059	0.0494	0.0377	0.0454	0.0405	0.0225		0.00749	0.00636	-0.002	0.0085	0.00548	0.00458	0.00093	-0.00159		5.61001e-05	4.04496e-05	4e-06	7.225e-05	3.00304e-05	2.09764e-05	8.649e-07	2.5281e-06
27.8	0.06239	0.06886	0.0605	0.05525	0.03993	0.04673	0.04283	0.01656		27.8	0.0551	0.0624	0.0589	0.0484	0.0373	0.0452	0.0403	0.0226		0.00729	0.00646	0.0016	0.00685	0.00263	0.00153	0.00253	-0.00604		5.31441e-05	4.17316e-05	2.56e-06	4.69225e-05	6.9169e-06	2.3409e-06	6.4009e-06	3.64816e-05
28	0.06404	0.06856	0.06275	0.0527	0.03428	0.04978	0.03853	0.01276		28	0.0547	0.0622	0.0584	0.0479	0.037	0.0453	0.0399	0.0224		0.00934	0.00636	0.00435	0.0048	-0.00272	0.00448	-0.00137	-0.00964		8.72356e-05	4.04496e-05	1.89225e-05	2.304e-05	7.3984e-06	2.00704e-05	1.8769e-06	9.29296e-05
28.2	0.06169	0.06641	0.06405	0.05005	0.03418	0.05063	0.03998	0.00746		28.2	0.0547	0.0619	0.0576	0.0479	0.0369	0.0454	0.0397	0.022		0.00699	0.00451	0.00645	0.00215	-0.00272	0.00523	0.00028	-0.01454		4.88601e-05	2.03401e-05	4.16025e-05	4.6225e-06	7.3984e-06	2.73529e-05	7.84e-08	0.000211412
28.4	0.06004	0.06286	0.06325	0.0526	0.03418	0.04833	0.03833	0.00946		28.4	0.0551	0.0617	0.0567	0.0482	0.037	0.0454	0.0396	0.0218		0.00494	0.00116	0.00655	0.0044	-0.00282	0.00293	-0.00127	-0.01234		2.44036e-05	1.3456e-06	4.29025e-05	1.936e-05	7.9524e-06	8.5849e-06	1.6129e-06	0.000152276
28.6	0.05939	0.06936	0.0601	0.05085	0.03418	0.04778	0.03708	0.01516		28.6	0.055	0.0611	0.0561	0.0484	0.037	0.0452	0.0396	0.022		0.00439	0.00826	0.004	0.00245	-0.00282	0.00258	-0.00252	-0.00684		1.92721e-05	6.82276e-05	1.6e-05	6.0025e-06	7.9524e-06	6.6564e-06	6.3504e-06	4.67856e-05
28.8	0.06219	0.06751	0.05775	0.0501	0.03938	0.04938	0.03743	0.01401		28.8	0.0554	0.0607	0.0558	0.0483	0.037	0.0448	0.0395	0.0219		0.00679	0.00681	0.00195	0.0018	0.00238	0.00458	-0.00207	-0.00789		4.61041e-05	4.63761e-05	3.8025e-06	3.24e-06	5.6644e-06	2.09764e-05	4.2849e-06	6.22521e-05
29	0.06069	0.06206	0.05935	0.05175	0.03888	0.04838	0.03898	0.01561		29	0.0554	0.0608	0.0559	0.0481	0.0368	0.0443	0.0393	0.022		0.00529	0.00126	0.00345	0.00365	0.00208	0.00408	-0.00032	-0.00639		2.79841e-05	1.5876e-06	1.19025e-05	1.33225e-05	4.3264e-06	1.66464e-05	1.024e-07	4.08321e-05
29.2	0.06314	0.06301	0.0613	0.05005	0.03508	0.04573	0.03853	0.01301		29.2	0.0547	0.0614	0.0563	0.0478	0.0365	0.0438	0.0391	0.022		0.00844	0.00161	0.005	0.00225	-0.00142	0.00193	-0.00057	-0.00899		7.12336e-05	2.5921e-06	2.5e-05	5.0625e-06	2.0164e-06	3.7249e-06	3.249e-07	8.08201e-05
29.4	0.06064	0.06686	0.0637	0.0537	0.03593	0.04753	0.03733	0.02181		29.4	0.0541	0.0616	0.0569	0.0475	0.036	0.0437	0.0391	0.0217		0.00654	0.00526	0.0068	0.0062	-7e-05	0.00383	-0.00177	0.00011		4.27716e-05	2.76676e-05	4.624e-05	3.844e-05	4.9e-09	1.46689e-05	3.1329e-06	1.21e-08
29.6	0.06234	0.06481	0.06135	0.0565	0.03823	0.04803	0.03838	0.02346		29.6	0.0536	0.0611	0.057	0.0475	0.0355	0.044	0.039	0.0215		0.00874	0.00371	0.00435	0.009	0.00273	0.00403	-0.00062	0.00196		7.63876e-05	1.37641e-05	1.89225e-05	8.1e-05	7.4529e-06	1.62409e-05	3.844e-07	3.8416e-06
29.8	0.06029	0.06621	0.0586	0.0554	0.03523	0.04328	0.03968	0.01241		29.8	0.0535	0.0603	0.0564	0.0478	0.0353	0.0445	0.0391	0.0215		0.00679	0.00591	0.0022	0.0076	-7e-05	-0.00122	0.00058	-0.00909		4.61041e-05	3.49281e-05	4.84e-06	5.776e-05	4.9e-09	1.4884e-06	3.364e-07	8.26281e-05
30	0.06069	0.07081	0.059	0.0541	0.03268	0.04773	0.03883	0.01116		30	0.0535	0.0598	0.0557	0.0478	0.0353	0.0448	0.0391	0.0215		0.00719	0.01101	0.0033	0.0063	-0.00262	0.00293	-0.00027	-0.01034		5.16961e-05	0.00012122	1.089e-05	3.969e-05	6.8644e-06	8.5849e-06	7.29e-08	0.000106916
30.2	0.05919	0.06966	0.0587	0.0551	0.03278	0.04713	0.03603	0.00761		30.2	0.0535	0.0595	0.0555	0.0474	0.0351	0.0444	0.039	0.0216		0.00569	0.01016	0.0032	0.0077	-0.00232	0.00273	-0.00297	-0.01399		3.23761e-05	0.000103226	1.024e-05	5.929e-05	5.3824e-06	7.4529e-06	8.8209e-06	0.00019572
30.4	0.06124	0.06806	0.0604	0.0514	0.03163	0.04573	0.04023	0.00826		30.4	0.0538	0.06	0.0557	0.0468	0.035	0.0435	0.0387	0.0217		0.00744	0.00806	0.0047	0.0046	-0.00337	0.00223	0.00153	-0.01344		5.53536e-05	6.49636e-05	2.209e-05	2.116e-05	1.13569e-05	4.9729e-06	2.3409e-06	0.000180634
30.6	0.06099	0.07406	0.06385	0.0449	0.03563	0.04663	0.03308	0.02626		30.6	0.0541	0.0603	0.056	0.0463	0.035	0.0426	0.0382	0.0216		0.00689	0.01376	0.00785	-0.0014	0.00063	0.00403	-0.00512	0.00466		4.74721e-05	0.000189338	6.16225e-05	1.96e-06	3.969e-07	1.62409e-05	2.62144e-05	2.17156e-05
30.8	0.05879	0.07251	0.06285	0.0483	0.03313	0.04658	0.03628	0.02426		30.8	0.0539	0.0606	0.0564	0.046	0.0351	0.0424	0.0377	0.0214		0.00489	0.01191	0.00645	0.0023	-0.00197	0.00418	-0.00142	0.00286		2.39121e-05	0.000141848	4.16025e-05	5.29e-06	3.8809e-06	1.74724e-05	2.0164e-06	8.1796e-06
31	0.05894	0.06786	0.06245	0.0494	0.03633	0.04418	0.03548	0.01776		31	0.0537	0.0609	0.0568	0.046	0.0351	0.0426	0.0376	0.0213		0.00524	0.00696	0.00565	0.0034	0.00123	0.00158	-0.00212	-0.00354		2.74576e-05	4.84416e-05	3.19225e-05	1.156e-05	1.5129e-06	2.4964e-06	4.4944e-06	1.25316e-05
31.2	0.06084	0.06436	0.061	0.0533	0.03703	0.04543	0.04013	0.01721		31.2	0.054	0.0604	0.0574	0.0462	0.0349	0.043	0.0377	0.0212		0.00684	0.00396	0.0036	0.0071	0.00213	0.00243	0.00243	-0.00399		4.67856e-05	1.56816e-05	1.296e-05	5.041e-05	4.5369e-06	5.9049e-06	5.9049e-06	1.59201e-05
31.4	0.05644	0.05711	0.05775	0.05125	0.03813	0.04293	0.03643	0.01606		31.4	0.0538	0.0594	0.0577	0.0464	0.0348	0.0432	0.0379	0.021		0.00264	-0.00229	5e-05	0.00485	0.00333	-0.00027	-0.00147	-0.00494		6.9696e-06	5.2441e-06	2.5e-09	2.35225e-05	1.10889e-05	7.29e-08	2.1609e-06	2.44036e-05
31.6	0.06264	0.05946	0.0581	0.05115	0.03368	0.04613	0.03673	0.01496		31.6	0.0536	0.0584	0.0573	0.0467	0.0347	0.0431	0.0378	0.021		0.00904	0.00106	0.0008	0.00445	-0.00102	0.00303	-0.00107	-0.00604		8.17216e-05	1.1236e-06	6.4e-07	1.98025e-05	1.0404e-06	9.1809e-06	1.1449e-06	3.64816e-05
31.8	0.06129	0.06341	0.0591	0.04875	0.03538	0.04543	0.03718	0.01491		31.8	0.0534	0.058	0.0568	0.0465	0.0348	0.0429	0.0377	0.0212		0.00789	0.00541	0.0023	0.00225	0.00058	0.00253	-0.00052	-0.00629		6.22521e-05	2.92681e-05	5.29e-06	5.0625e-06	3.364e-07	6.4009e-06	2.704e-07	3.95641e-05
32	0.05809	0.06101	0.06125	0.04785	0.03333	0.04638	0.03648	0.01416		32	0.0532	0.058	0.0565	0.0462	0.0348	0.0424	0.0375	0.0213		0.00489	0.00301	0.00475	0.00165	-0.00147	0.00398	-0.00102	-0.00714		2.39121e-05	9.0601e-06	2.25625e-05	2.7225e-06	2.1609e-06	1.58404e-05	1.0404e-06	5.09796e-05
32.2	0.06084	0.06261	0.06205	0.04615	0.03778	0.04298	0.03503	0.00961		32.2	0.0532	0.058	0.0563	0.0458	0.0347	0.0419	0.0373	0.0211		0.00764	0.00461	0.00575	0.00035	0.00308	0.00108	-0.00227	-0.01149		5.83696e-05	2.12521e-05	3.30625e-05	1.225e-07	9.4864e-06	1.1664e-06	5.1529e-06	0.00013202
32.4	0.05939	0.06466	0.05905	0.0488	0.03513	0.04193	0.03713	0.01246		32.4	0.0529	0.0576	0.0562	0.0454	0.0345	0.0415	0.0372	0.0211		0.00649	0.00706	0.00285	0.0034	0.00063	0.00043	-7e-05	-0.00864		4.21201e-05	4.98436e-05	8.1225e-06	1.156e-05	3.969e-07	1.849e-07	4.9e-09	7.46496e-05
32.6	0.05629	0.05971	0.05825	0.04965	0.03783	0.03873	0.03878	0.01946		32.6	0.0523	0.057	0.0561	0.0453	0.0343	0.0414	0.037	0.021		0.00399	0.00271	0.00215	0.00435	0.00353	-0.00267	0.00178	-0.00154		1.59201e-05	7.3441e-06	4.6225e-06	1.89225e-05	1.24609e-05	7.1289e-06	3.1684e-06	2.3716e-06
32.8	0.05954	0.05881	0.0581	0.05185	0.03383	0.03753	0.03728	0.01731		32.8	0.0519	0.0563	0.0558	0.0453	0.0342	0.0416	0.0369	0.0211		0.00764	0.00251	0.0023	0.00655	-0.00037	-0.00407	0.00038	-0.00379		5.83696e-05	6.3001e-06	5.29e-06	4.29025e-05	1.369e-07	1.65649e-05	1.444e-07	1.43641e-05
33	0.05949	0.06081	0.05775	0.0469	0.03518	0.04623	0.03553	0.01386		33	0.0515	0.0558	0.0552	0.0455	0.034	0.0417	0.0369	0.021		0.00799	0.00501	0.00255	0.0014	0.00118	0.00453	-0.00137	-0.00714		6.38401e-05	2.51001e-05	6.5025e-06	1.96e-06	1.3924e-06	2.05209e-05	1.8769e-06	5.09796e-05
33.2	0.05784	0.06086	0.06155	0.0436	0.03723	0.04908	0.03418	0.01136		33.2	0.0509	0.0556	0.0544	0.0455	0.0338	0.0417	0.0368	0.0209		0.00694	0.00526	0.00715	-0.0019	0.00343	0.00738	-0.00262	-0.00954		4.81636e-05	2.76676e-05	5.11225e-05	3.61e-06	1.17649e-05	5.44644e-05	6.8644e-06	9.10116e-05
33.4	0.05749	0.05826	0.0614	0.04975	0.03063	0.04433	0.03273	0.01271		33.4	0.0506	0.0555	0.0538	0.0453	0.0335	0.0415	0.0368	0.0209		0.00689	0.00276	0.0076	0.00445	-0.00287	0.00283	-0.00407	-0.00819		4.74721e-05	7.6176e-06	5.776e-05	1.98025e-05	8.2369e-06	8.0089e-06	1.65649e-05	6.70761e-05
33.6	0.05869	0.05941	0.0599	0.0507	0.03303	0.04558	0.03343	0.01451		33.6	0.0502	0.0554	0.0537	0.0448	0.033	0.0411	0.0366	0.021		0.00849	0.00401	0.0062	0.0059	3e-05	0.00448	-0.00317	-0.00649		7.20801e-05	1.60801e-05	3.844e-05	3.481e-05	9e-10	2.00704e-05	1.00489e-05	4.21201e-05
33.8	0.05789	0.06196	0.0562	0.05495	0.03573	0.04623	0.03643	0.01201		33.8	0.05	0.0556	0.0537	0.0444	0.0326	0.0409	0.0363	0.0208		0.00789	0.00636	0.0025	0.01055	0.00313	0.00533	0.00013	-0.00879		6.22521e-05	4.04496e-05	6.25e-06	0.000111302	9.7969e-06	2.84089e-05	1.69e-08	7.72641e-05
34	0.05869	0.06201	0.05495	0.053	0.03348	0.05058	0.03898	0.01141		34	0.0497	0.0556	0.0537	0.044	0.0324	0.0406	0.036	0.0208		0.00899	0.00641	0.00125	0.009	0.00108	0.00998	0.00298	-0.00939		8.08201e-05	4.10881e-05	1.5625e-06	8.1e-05	1.1664e-06	9.96004e-05	8.8804e-06	8.81721e-05
34.2	0.05759	0.06296	0.05585	0.04575	0.03193	0.04323	0.03298	0.00926		34.2	0.0495	0.0553	0.0535	0.0439	0.0323	0.0405	0.0356	0.0207		0.00809	0.00766	0.00235	0.00185	-0.00037	0.00273	-0.00262	-0.01144		6.54481e-05	5.86756e-05	5.5225e-06	3.4225e-06	1.369e-07	7.4529e-06	6.8644e-06	0.000130874
34.4	0.05779	0.06546	0.05825	0.0451	0.03473	0.04303	0.03703	0.00816		34.4	0.0493	0.0551	0.0532	0.0439	0.0323	0.0405	0.0355	0.0206		0.00849	0.01036	0.00505	0.0012	0.00243	0.00253	0.00153	-0.01244		7.20801e-05	0.00010733	2.55025e-05	1.44e-06	5.9049e-06	6.4009e-06	2.3409e-06	0.000154754
34.6	0.05919	0.06406	0.0602	0.0392	0.02983	0.04383	0.03423	0.01901		34.6	0.0491	0.0552	0.0529	0.0439	0.0321	0.0405	0.0355	0.0205		0.01009	0.00886	0.0073	-0.0047	-0.00227	0.00333	-0.00127	-0.00149		0.000101808	7.84996e-05	5.329e-05	2.209e-05	5.1529e-06	1.10889e-05	1.6129e-06	2.2201e-06
34.8	0.05539	0.06166	0.06055	0.04535	0.02943	0.04098	0.03433	0.01596		34.8	0.049	0.0553	0.0527	0.0436	0.032	0.0404	0.0354	0.0204		0.00639	0.00636	0.00785	0.00175	-0.00257	0.00058	-0.00107	-0.00444		4.08321e-05	4.04496e-05	6.16225e-05	3.0625e-06	6.6049e-06	3.364e-07	1.1449e-06	1.97136e-05
35	0.05629	0.06231	0.0587	0.0472	0.04018	0.04173	0.03213	0.01416		35	0.0488	0.0551	0.0527	0.0433	0.0318	0.0402	0.0354	0.0204		0.00749	0.00721	0.006	0.0039	0.00838	0.00153	-0.00327	-0.00624		5.61001e-05	5.19841e-05	3.6e-05	1.521e-05	7.02244e-05	2.3409e-06	1.06929e-05	3.89376e-05
35.2	0.05574	0.06156	0.056	0.0483	0.03688	0.04508	0.03708	0.01181		35.2	0.0488	0.0547	0.0527	0.0431	0.0317	0.0399	0.0352	0.0203		0.00694	0.00686	0.0033	0.0052	0.00518	0.00518	0.00188	-0.00849		4.81636e-05	4.70596e-05	1.089e-05	2.704e-05	2.68324e-05	2.68324e-05	3.5344e-06	7.20801e-05
35.4	0.05394	0.06031	0.05325	0.05325	0.03668	0.04513	0.03883	0.00906		35.4	0.0488	0.0544	0.0525	0.043	0.0317	0.0397	0.035	0.0203		0.00514	0.00591	0.00075	0.01025	0.00498	0.00543	0.00383	-0.01124		2.64196e-05	3.49281e-05	5.625e-07	0.000105063	2.48004e-05	2.94849e-05	1.46689e-05	0.000126338
35.6	0.05269	0.06021	0.05245	0.0504	0.03338	0.04743	0.03358	0.00841		35.6	0.0488	0.0542	0.0522	0.0428	0.0317	0.0396	0.0348	0.0202		0.00389	0.00601	0.00025	0.0076	0.00168	0.00783	-0.00122	-0.01179		1.51321e-05	3.61201e-05	6.25e-08	5.776e-05	2.8224e-06	6.13089e-05	1.4884e-06	0.000139004
35.8	0.05499	0.05776	0.0578	0.0475	0.03283	0.04673	0.03438	0.01136		35.8	0.0486	0.054	0.0519	0.0427	0.0317	0.0395	0.0346	0.0201		0.00639	0.00376	0.0059	0.0048	0.00113	0.00723	-0.00022	-0.00874		4.08321e-05	1.41376e-05	3.481e-05	2.304e-05	1.2769e-06	5.22729e-05	4.84e-08	7.63876e-05
36	0.05424	0.05836	0.06235	0.04125	0.03028	0.04493	0.03118	0.01271		36	0.0486	0.0538	0.0518	0.0426	0.0317	0.0394	0.0346	0.0199		0.00564	0.00456	0.01055	-0.00135	-0.00142	0.00553	-0.00342	-0.00719		3.18096e-05	2.07936e-05	0.000111303	1.8225e-06	2.0164e-06	3.05809e-05	1.16964e-05	5.16961e-05
36.2	0.05639	0.05996	0.0619	0.04245	0.02933	0.04213	0.03298	0.01201		36.2	0.0486	0.0535	0.0518	0.0425	0.0316	0.0393	0.0346	0.0198		0.00779	0.00646	0.0101	-5e-05	-0.00227	0.00283	-0.00162	-0.00779		6.06841e-05	4.17316e-05	0.00010201	2.5e-09	5.1529e-06	8.0089e-06	2.6244e-06	6.06841e-05
36.4	0.05639	0.05716	0.05645	0.04335	0.03388	0.04038	0.03208	0.01096		36.4	0.0486	0.0532	0.0518	0.0425	0.0315	0.0392	0.0346	0.0199		0.00779	0.00396	0.00465	0.00085	0.00238	0.00118	-0.00252	-0.00894		6.06841e-05	1.56816e-05	2.16225e-05	7.225e-07	5.6644e-06	1.3924e-06	6.3504e-06	7.99236e-05
36.6	0.05454	0.05821	0.0542	0.0417	0.03768	0.03943	0.03483	0.00936		36.6	0.0484	0.0527	0.0516	0.0425	0.0314	0.0392	0.0346	0.0199		0.00614	0.00551	0.0026	-0.0008	0.00628	0.00023	0.00023	-0.01054		3.76996e-05	3.03601e-05	6.76e-06	6.4e-07	3.94384e-05	5.29e-08	5.29e-08	0.000111092
36.8	0.05514	0.06226	0.05205	0.0453	0.04013	0.03923	0.02898	0.01001		36.8	0.0482	0.0524	0.0513	0.0425	0.0315	0.0391	0.0345	0.02		0.00694	0.00986	0.00075	0.0028	0.00863	0.00013	-0.00552	-0.00999		4.81636e-05	9.72196e-05	5.625e-07	7.84e-06	7.44769e-05	1.69e-08	3.04704e-05	9.98001e-05
37	0.05299	0.06066	0.05385	0.04555	0.03893	0.04408	0.03513	0.01616		37	0.0479	0.0523	0.051	0.0424	0.0314	0.0389	0.0343	0.0199		0.00509	0.00836	0.00285	0.00315	0.00753	0.00518	0.00083	-0.00374		2.59081e-05	6.98896e-05	8.1225e-06	9.9225e-06	5.67009e-05	2.68324e-05	6.889e-07	1.39876e-05
37.2	0.05514	0.05941	0.0544	0.04455	0.02963	0.04338	0.03658	0.01411		37.2	0.0475	0.0521	0.0509	0.0423	0.0313	0.0386	0.0343	0.0198		0.00764	0.00731	0.0035	0.00225	-0.00167	0.00478	0.00228	-0.00569		5.83696e-05	5.34361e-05	1.225e-05	5.0625e-06	2.7889e-06	2.28484e-05	5.1984e-06	3.23761e-05
37.4	0.05389	0.05621	0.0565	0.05015	0.03318	0.04563	0.03578	0.01136		37.4	0.0471	0.0522	0.0509	0.0419	0.031	0.0383	0.0342	0.0197		0.00679	0.00401	0.0056	0.00825	0.00218	0.00733	0.00158	-0.00834		4.61041e-05	1.60801e-05	3.136e-05	6.80625e-05	4.7524e-06	5.37289e-05	2.4964e-06	6.95556e-05
37.6	0.05264	0.05581	0.0569	0.0482	0.03053	0.04438	0.03398	0.00881		37.6	0.0467	0.0525	0.0511	0.0416	0.0306	0.0382	0.0341	0.0197		0.00594	0.00331	0.0058	0.0066	-7e-05	0.00618	-0.00012	-0.01089		3.52836e-05	1.09561e-05	3.364e-05	4.356e-05	4.9e-09	3.81924e-05	1.44e-08	0.000118592
37.8	0.05324	0.05841	0.0552	0.04585	0.03163	0.03973	0.03353	0.01061		37.8	0.0465	0.0524	0.0511	0.0414	0.0303	0.0382	0.0339	0.0197		0.00674	0.00601	0.0041	0.00445	0.00133	0.00153	-0.00037	-0.00909		4.54276e-05	3.61201e-05	1.681e-05	1.98025e-05	1.7689e-06	2.3409e-06	1.369e-07	8.26281e-05
38	0.05459	0.06056	0.0551	0.03885	0.03138	0.03943	0.03273	0.01031		38	0.0465	0.052	0.0509	0.0413	0.0301	0.0383	0.0338	0.0197		0.00809	0.00856	0.0042	-0.00245	0.00128	0.00113	-0.00107	-0.00939		6.54481e-05	7.32736e-05	1.764e-05	6.0025e-06	1.6384e-06	1.2769e-06	1.1449e-06	8.81721e-05
38.2	0.05464	0.05766	0.0474	0.04325	0.03253	0.03873	0.03083	0.01721		38.2	0.0463	0.0515	0.0505	0.0414	0.0299	0.0383	0.0336	0.0196		0.00834	0.00616	-0.0031	0.00185	0.00263	0.00043	-0.00277	-0.00239		6.95556e-05	3.79456e-05	9.61e-06	3.4225e-06	6.9169e-06	1.849e-07	7.6729e-06	5.7121e-06
38.4	0.05509	0.05761	0.04795	0.04425	0.03283	0.04013	0.02953	0.01671		38.4	0.046	0.0514	0.05	0.0413	0.0299	0.0382	0.0335	0.0196		0.00909	0.00621	-0.00205	0.00295	0.00293	0.00193	-0.00397	-0.00289		8.26281e-05	3.85641e-05	4.2025e-06	8.7025e-06	8.5849e-06	3.7249e-06	1.57609e-05	8.3521e-06
38.6	0.05259	0.05896	0.05305	0.03845	0.03343	0.04008	0.03128	0.01406		38.6	0.0457	0.0515	0.0498	0.041	0.0298	0.038	0.0334	0.0194		0.00689	0.00746	0.00325	-0.00255	0.00363	0.00208	-0.00212	-0.00534		4.74721e-05	5.56516e-05	1.05625e-05	6.5025e-06	1.31769e-05	4.3264e-06	4.4944e-06	2.85156e-05
38.8	0.05104	0.05536	0.05635	0.04335	0.02248	0.04188	0.03273	0.01081		38.8	0.0454	0.0515	0.0499	0.0406	0.0296	0.0376	0.0332	0.0194		0.00564	0.00386	0.00645	0.00275	-0.00712	0.00428	-0.00047	-0.00859		3.18096e-05	1.48996e-05	4.16025e-05	7.5625e-06	5.06944e-05	1.83184e-05	2.209e-07	7.37881e-05
39	0.05384	0.05586	0.05965	0.0471	0.02468	0.03828	0.03483	0.01076		39	0.0453	0.0513	0.05	0.0403	0.0294	0.0374	0.0331	0.0194		0.00854	0.00456	0.00965	0.0068	-0.00472	0.00088	0.00173	-0.00864		7.29316e-05	2.07936e-05	9.31225e-05	4.624e-05	2.22784e-05	7.744e-07	2.9929e-06	7.46496e-05
39.2	0.05314	0.05601	0.0566	0.055	0.02548	0.03953	0.03338	0.01131		39.2	0.0453	0.0508	0.0498	0.0401	0.0293	0.0372	0.0329	0.0194		0.00784	0.00521	0.0068	0.0149	-0.00382	0.00233	0.00048	-0.00809		6.14656e-05	2.71441e-05	4.624e-05	0.00022201	1.45924e-05	5.4289e-06	2.304e-07	6.54481e-05
39.4	0.05264	0.05376	0.05305	0.04695	0.02458	0.04083	0.02838	0.01211		39.4	0.0452	0.0504	0.0495	0.04	0.0293	0.0372	0.0327	0.0194		0.00744	0.00336	0.00355	0.00695	-0.00472	0.00363	-0.00432	-0.00729		5.53536e-05	1.12896e-05	1.26025e-05	4.83025e-05	2.22784e-05	1.31769e-05	1.86624e-05	5.31441e-05
39.6	0.04919	0.05741	0.0511	0.0414	0.02783	0.04243	0.02928	0.01211		39.6	0.0451	0.0501	0.0489	0.04	0.0293	0.0373	0.0327	0.0191		0.00409	0.00731	0.0022	0.0014	-0.00147	0.00513	-0.00342	-0.00699		1.67281e-05	5.34361e-05	4.84e-06	1.96e-06	2.1609e-06	2.63169e-05	1.16964e-05	4.88601e-05
39.8	0.05139	0.05711	0.04925	0.0439	0.02928	0.03863	0.03238	0.00931		39.8	0.0451	0.0498	0.0487	0.0399	0.0293	0.0372	0.0327	0.0189		0.00629	0.00731	0.00055	0.004	-2e-05	0.00143	-0.00032	-0.00959		3.95641e-05	5.34361e-05	3.025e-07	1.6e-05	4e-10	2.0449e-06	1.024e-07	9.19681e-05
40	0.05084	0.05451	0.05135	0.0416	0.03228	0.04173	0.03143	0.00981		40	0.0451	0.0497	0.0486	0.0398	0.0293	0.037	0.0326	0.0189		0.00574	0.00481	0.00275	0.0018	0.00298	0.00473	-0.00117	-0.00909		3.29476e-05	2.31361e-05	7.5625e-06	3.24e-06	8.8804e-06	2.23729e-05	1.3689e-06	8.26281e-05
40.2	0.04924	0.05616	0.05395	0.0419	0.03098	0.03753	0.03103	0.01376		40.2	0.0449	0.0496	0.0486	0.0396	0.0292	0.0367	0.0325	0.0189		0.00434	0.00656	0.00535	0.0023	0.00178	0.00083	-0.00147	-0.00514		1.88356e-05	4.30336e-05	2.86225e-05	5.29e-06	3.1684e-06	6.889e-07	2.1609e-06	2.64196e-05
40.4	0.05214	0.05481	0.05675	0.044	0.03183	0.03878	0.03193	0.01396		40.4	0.0448	0.0495	0.0487	0.0394	0.0291	0.0364	0.0324	0.019		0.00734	0.00531	0.00805	0.0046	0.00273	0.00238	-0.00047	-0.00504		5.38756e-05	2.81961e-05	6.48025e-05	2.116e-05	7.4529e-06	5.6644e-06	2.209e-07	2.54016e-05
40.6	0.04819	0.05431	0.0562	0.04355	0.03003	0.03918	0.03228	0.01481		40.6	0.0447	0.0492	0.0487	0.0393	0.029	0.0363	0.0322	0.0191		0.00349	0.00511	0.0075	0.00425	0.00103	0.00288	8e-05	-0.00429		1.21801e-05	2.61121e-05	5.625e-05	1.80625e-05	1.0609e-06	8.2944e-06	6.4e-09	1.84041e-05
40.8	0.04769	0.05531	0.0521	0.04265	0.02873	0.03783	0.02978	0.01001		40.8	0.0445	0.0487	0.0486	0.0393	0.0289	0.0363	0.032	0.0189		0.00319	0.00661	0.0035	0.00335	-0.00017	0.00153	-0.00222	-0.00889		1.01761e-05	4.36921e-05	1.225e-05	1.12225e-05	2.89e-08	2.3409e-06	4.9284e-06	7.90321e-05
41	0.04974	0.05426	0.05115	0.0411	0.02733	0.03723	0.02953	0.00726		41	0.0441	0.0484	0.0482	0.0392	0.0288	0.0363	0.0319	0.0187		0.00564	0.00586	0.00295	0.0019	-0.00147	0.00093	-0.00237	-0.01144		3.18096e-05	3.43396e-05	8.7025e-06	3.61e-06	2.1609e-06	8.649e-07	5.6169e-06	0.000130874
41.2	0.04819	0.05396	0.049	0.0409	0.03198	0.03843	0.03073	0.00751		41.2	0.0438	0.0483	0.0478	0.0392	0.0287	0.0362	0.0319	0.0186		0.00439	0.00566	0.0012	0.0017	0.00328	0.00223	-0.00117	-0.01109		1.92721e-05	3.20356e-05	1.44e-06	2.89e-06	1.07584e-05	4.9729e-06	1.3689e-06	0.000122988
41.4	0.05029	0.05276	0.04935	0.0388	0.02698	0.03703	0.03208	0.01116		41.4	0.0435	0.0482	0.0477	0.039	0.0285	0.036	0.0319	0.0186		0.00679	0.00456	0.00165	-0.0002	-0.00152	0.00103	0.00018	-0.00744		4.61041e-05	2.07936e-05	2.7225e-06	4e-08	2.3104e-06	1.0609e-06	3.24e-08	5.53536e-05
41.6	0.04959	0.05296	0.05065	0.0386	0.02923	0.03738	0.02848	0.01136		41.6	0.0433	0.048	0.0477	0.0387	0.0282	0.0359	0.0318	0.0187		0.00629	0.00496	0.00295	-0.0001	0.00103	0.00148	-0.00332	-0.00734		3.95641e-05	2.46016e-05	8.7025e-06	1e-08	1.0609e-06	2.1904e-06	1.10224e-05	5.38756e-05
41.8	0.04749	0.05171	0.05215	0.03705	0.02728	0.03913	0.02818	0.00976		41.8	0.0431	0.0476	0.0476	0.0385	0.0279	0.0357	0.0317	0.0188		0.00439	0.00411	0.00455	-0.00145	-0.00062	0.00343	-0.00352	-0.00904		1.92721e-05	1.68921e-05	2.07025e-05	2.1025e-06	3.844e-07	1.17649e-05	1.23904e-05	8.17216e-05
42	0.04894	0.05311	0.05355	0.041	0.02618	0.03608	0.02908	0.00941		42	0.0429	0.047	0.0474	0.0383	0.0277	0.0356	0.0315	0.0187		0.00604	0.00611	0.00615	0.0027	-0.00152	0.00048	-0.00242	-0.00929		3.64816e-05	3.73321e-05	3.78225e-05	7.29e-06	2.3104e-06	2.304e-07	5.8564e-06	8.63041e-05
42.2	0.04619	0.05396	0.05175	0.04185	0.03158	0.03663	0.03038	0.00876		42.2	0.0427	0.0464	0.047	0.0382	0.0276	0.0355	0.0312	0.0186		0.00349	0.00756	0.00475	0.00365	0.00398	0.00113	-0.00082	-0.00984		1.21801e-05	5.71536e-05	2.25625e-05	1.33225e-05	1.58404e-05	1.2769e-06	6.724e-07	9.68256e-05
42.4	0.04959	0.05606	0.0507	0.04045	0.02878	0.03888	0.03053	0.00996		42.4	0.0423	0.0459	0.0466	0.0381	0.0275	0.0354	0.0311	0.0185		0.00729	0.01016	0.0041	0.00235	0.00128	0.00348	-0.00057	-0.00854		5.31441e-05	0.000103226	1.681e-05	5.5225e-06	1.6384e-06	1.21104e-05	3.249e-07	7.29316e-05
42.6	0.04819	0.05531	0.05005	0.0381	0.02698	0.03883	0.03068	0.00851		42.6	0.0418	0.0457	0.0462	0.0378	0.0274	0.0351	0.0309	0.0184		0.00639	0.00961	0.00385	0.0003	-0.00042	0.00373	-0.00022	-0.00989		4.08321e-05	9.23521e-05	1.48225e-05	9e-08	1.764e-07	1.39129e-05	4.84e-08	9.78121e-05
42.8	0.04599	0.05246	0.0485	0.03855	0.02783	0.03848	0.03108	0.00956		42.8	0.0413	0.0454	0.0459	0.0375	0.0272	0.0349	0.0308	0.0184		0.00469	0.00706	0.0026	0.00105	0.00063	0.00358	0.00028	-0.00884		2.19961e-05	4.98436e-05	6.76e-06	1.1025e-06	3.969e-07	1.28164e-05	7.84e-08	7.81456e-05
43	0.04864	0.05051	0.0484	0.0369	0.02498	0.03823	0.02843	0.00856		43	0.041	0.0451	0.0458	0.0372	0.0269	0.0347	0.0308	0.0184		0.00764	0.00541	0.0026	-0.0003	-0.00192	0.00353	-0.00237	-0.00984		5.83696e-05	2.92681e-05	6.76e-06	9e-08	3.6864e-06	1.24609e-05	5.6169e-06	9.68256e-05
43.2	0.04649	0.05156	0.05035	0.03665	0.02758	0.03773	0.02968	0.00916		43.2	0.0407	0.0449	0.0455	0.0369	0.0267	0.0345	0.0306	0.0184		0.00579	0.00666	0.00485	-0.00025	0.00088	0.00323	-0.00092	-0.00924		3.35241e-05	4.43556e-05	2.35225e-05	6.25e-08	7.744e-07	1.04329e-05	8.464e-07	8.53776e-05
43.4	0.04749	0.05216	0.05365	0.036	0.02453	0.03543	0.02988	0.01016		43.4	0.0405	0.0446	0.0451	0.0367	0.0265	0.0344	0.0304	0.0184		0.00699	0.00756	0.00855	-0.0007	-0.00197	0.00103	-0.00052	-0.00824		4.88601e-05	5.71536e-05	7.31025e-05	4.9e-07	3.8809e-06	1.0609e-06	2.704e-07	6.78976e-05
43.6	0.04729	0.05231	0.0527	0.03435	0.02638	0.03433	0.02868	0.01291		43.6	0.0404	0.0442	0.0447	0.0365	0.0264	0.0343	0.0302	0.0182		0.00689	0.00811	0.008	-0.00215	-2e-05	3e-05	-0.00152	-0.00529		4.74721e-05	6.57721e-05	6.4e-05	4.6225e-06	4e-10	9e-10	2.3104e-06	2.79841e-05
43.8	0.04729	0.05266	0.0528	0.03725	0.02298	0.03433	0.02828	0.01031		43.8	0.0402	0.0438	0.0445	0.0364	0.0263	0.0341	0.03	0.018		0.00709	0.00886	0.0083	0.00085	-0.00332	0.00023	-0.00172	-0.00769		5.02681e-05	7.84996e-05	6.889e-05	7.225e-07	1.10224e-05	5.29e-08	2.9584e-06	5.91361e-05
44	0.04649	0.05086	0.0493	0.03915	0.02158	0.03593	0.02783	0.00956		44	0.0399	0.0438	0.0443	0.0361	0.0261	0.0338	0.0298	0.018		0.00659	0.00706	0.005	0.00305	-0.00452	0.00213	-0.00197	-0.00844		4.34281e-05	4.98436e-05	2.5e-05	9.3025e-06	2.04304e-05	4.5369e-06	3.8809e-06	7.12336e-05
44.2	0.04674	0.05146	0.04805	0.03755	0.02343	0.03593	0.02998	0.00706		44.2	0.0396	0.0439	0.0442	0.0359	0.0259	0.0336	0.0297	0.0179		0.00714	0.00756	0.00385	0.00165	-0.00247	0.00233	0.00028	-0.01084		5.09796e-05	5.71536e-05	1.48225e-05	2.7225e-06	6.1009e-06	5.4289e-06	7.84e-08	0.000117506
44.4	0.04719	0.05261	0.04565	0.03615	0.02563	0.03548	0.03133	0.00961		44.4	0.0395	0.0439	0.0442	0.0356	0.0257	0.0334	0.0296	0.0179		0.00769	0.00871	0.00145	0.00055	-7e-05	0.00208	0.00173	-0.00829		5.91361e-05	7.58641e-05	2.1025e-06	3.025e-07	4.9e-09	4.3264e-06	2.9929e-06	6.87241e-05
44.6	0.04729	0.05216	0.04615	0.0371	0.02828	0.03678	0.02868	0.00986		44.6	0.0393	0.0436	0.0443	0.0354	0.0254	0.0333	0.0294	0.0179		0.00799	0.00856	0.00185	0.0017	0.00288	0.00348	-0.00072	-0.00804		6.38401e-05	7.32736e-05	3.4225e-06	2.89e-06	8.2944e-06	1.21104e-05	5.184e-07	6.46416e-05
44.8	0.04609	0.04986	0.04985	0.0359	0.02888	0.03453	0.02768	0.01051		44.8	0.0392	0.0435	0.0442	0.0352	0.0252	0.0332	0.0292	0.0178		0.00689	0.00636	0.00565	0.0007	0.00368	0.00133	-0.00152	-0.00729		4.74721e-05	4.04496e-05	3.19225e-05	4.9e-07	1.35424e-05	1.7689e-06	2.3104e-06	5.31441e-05
45	0.04699	0.04971	0.05325	0.0371	0.02798	0.03543	0.02808	0.01136		45	0.0391	0.0433	0.0438	0.0352	0.0251	0.0332	0.0291	0.0177		0.00789	0.00641	0.00945	0.0019	0.00288	0.00223	-0.00102	-0.00634		6.22521e-05	4.10881e-05	8.93025e-05	3.61e-06	8.2944e-06	4.9729e-06	1.0404e-06	4.01956e-05
45.2	0.04599	0.05076	0.0523	0.0377	0.02728	0.03353	0.02513	0.00841		45.2	0.039	0.0431	0.0435	0.0351	0.0249	0.0332	0.0289	0.0175		0.00699	0.00766	0.0088	0.0026	0.00238	0.00033	-0.00377	-0.00909		4.88601e-05	5.86756e-05	7.744e-05	6.76e-06	5.6644e-06	1.089e-07	1.42129e-05	8.26281e-05
45.4	0.04659	0.05291	0.0505	0.0341	0.02363	0.03453	0.02718	0.00736		45.4	0.0389	0.0429	0.0433	0.0349	0.0248	0.033	0.0288	0.0174		0.00769	0.01001	0.0072	-0.0008	-0.00117	0.00153	-0.00162	-0.01004		5.91361e-05	0.0001002	5.184e-05	6.4e-07	1.3689e-06	2.3409e-06	2.6244e-06	0.000100802
45.6	0.04589	0.05141	0.0507	0.03605	0.02418	0.03353	0.02683	0.00771		45.6	0.0388	0.0428	0.0433	0.0348	0.0247	0.0328	0.0287	0.0174		0.00709	0.00861	0.0074	0.00125	-0.00052	0.00073	-0.00187	-0.00969		5.02681e-05	7.41321e-05	5.476e-05	1.5625e-06	2.704e-07	5.329e-07	3.4969e-06	9.38961e-05
45.8	0.04404	0.05271	0.0466	0.0353	0.02283	0.03348	0.02963	0.00861		45.8	0.0387	0.0427	0.0432	0.0346	0.0246	0.0325	0.0287	0.0175		0.00534	0.01001	0.0034	0.0007	-0.00177	0.00098	0.00093	-0.00889		2.85156e-05	0.0001002	1.156e-05	4.9e-07	3.1329e-06	9.604e-07	8.649e-07	7.90321e-05
46	0.04539	0.05376	0.04435	0.03335	0.02278	0.03633	0.02643	0.01136		46	0.0386	0.0426	0.0432	0.0344	0.0246	0.0323	0.0285	0.0175		0.00679	0.01116	0.00115	-0.00105	-0.00182	0.00403	-0.00207	-0.00614		4.61041e-05	0.000124546	1.3225e-06	1.1025e-06	3.3124e-06	1.62409e-05	4.2849e-06	3.76996e-05
46.2	0.04674	0.05201	0.04465	0.0328	0.02378	0.03248	0.02758	0.00981		46.2	0.0386	0.0426	0.0432	0.0343	0.0245	0.0322	0.0284	0.0175		0.00814	0.00941	0.00145	-0.0015	-0.00072	0.00028	-0.00082	-0.00769		6.62596e-05	8.85481e-05	2.1025e-06	2.25e-06	5.184e-07	7.84e-08	6.724e-07	5.91361e-05
46.4	0.04624	0.05291	0.04875	0.0358	0.02723	0.03363	0.03103	0.00736		46.4	0.0387	0.0425	0.0431	0.0342	0.0244	0.0322	0.0283	0.0174		0.00754	0.01041	0.00565	0.0016	0.00283	0.00143	0.00273	-0.01004		5.68516e-05	0.000108368	3.19225e-05	2.56e-06	8.0089e-06	2.0449e-06	7.4529e-06	0.000100802
46.6	0.04724	0.05141	0.0517	0.0466	0.02863	0.03508	0.02793	0.01066		46.6	0.0387	0.0426	0.043	0.0341	0.0244	0.0321	0.0281	0.0173		0.00854	0.00881	0.0087	0.0125	0.00423	0.00298	-0.00017	-0.00664		7.29316e-05	7.76161e-05	7.569e-05	0.00015625	1.78929e-05	8.8804e-06	2.89e-08	4.40896e-05
46.8	0.04604	0.05051	0.0501	0.04465	0.02538	0.03683	0.02843	0.01001		46.8	0.0387	0.0428	0.043	0.0341	0.0243	0.032	0.028	0.0172		0.00734	0.00771	0.0071	0.01055	0.00108	0.00483	0.00043	-0.00719		5.38756e-05	5.94441e-05	5.041e-05	0.000111303	1.1664e-06	2.33289e-05	1.849e-07	5.16961e-05
47	0.04504	0.05151	0.04935	0.0386	0.02493	0.03528	0.02653	0.00871		47	0.0388	0.0428	0.043	0.0341	0.0242	0.032	0.028	0.0171		0.00624	0.00871	0.00635	0.0045	0.00073	0.00328	-0.00147	-0.00839		3.89376e-05	7.58641e-05	4.03225e-05	2.025e-05	5.329e-07	1.07584e-05	2.1609e-06	7.03921e-05
47.2	0.04474	0.05021	0.0471	0.03695	0.02658	0.03478	0.02498	0.00856		47.2	0.0389	0.0426	0.0432	0.034	0.0241	0.032	0.028	0.0172		0.00584	0.00761	0.0039	0.00295	0.00248	0.00278	-0.00302	-0.00864		3.41056e-05	5.79121e-05	1.521e-05	8.7025e-06	6.1504e-06	7.7284e-06	9.1204e-06	7.46496e-05
47.4	0.04339	0.05036	0.0447	0.03415	0.02898	0.03458	0.02648	0.00771		47.4	0.0389	0.0422	0.0433	0.0341	0.024	0.032	0.0279	0.0172		0.00449	0.00816	0.0014	5e-05	0.00498	0.00258	-0.00142	-0.00949		2.01601e-05	6.65856e-05	1.96e-06	2.5e-09	2.48004e-05	6.6564e-06	2.0164e-06	9.00601e-05
47.6	0.04449	0.04966	0.04425	0.03365	0.03108	0.03538	0.02823	0.00836		47.6	0.0387	0.0418	0.0433	0.0341	0.024	0.0321	0.0279	0.0172		0.00579	0.00786	0.00095	-0.00045	0.00708	0.00328	0.00033	-0.00884		3.35241e-05	6.17796e-05	9.025e-07	2.025e-07	5.01264e-05	1.07584e-05	1.089e-07	7.81456e-05
47.8	0.04344	0.05141	0.04425	0.03575	0.03043	0.03278	0.02813	0.00731		47.8	0.0384	0.0414	0.043	0.0342	0.0239	0.0321	0.0278	0.0172		0.00504	0.01001	0.00125	0.00155	0.00653	0.00068	0.00033	-0.00989		2.54016e-05	0.0001002	1.5625e-06	2.4025e-06	4.26409e-05	4.624e-07	1.089e-07	9.78121e-05
48	0.04314	0.05241	0.04545	0.038	0.02963	0.03303	0.02708	0.00756		48	0.038	0.041	0.0426	0.0341	0.0239	0.032	0.0278	0.0172		0.00514	0.01141	0.00285	0.0039	0.00573	0.00103	-0.00072	-0.00964		2.64196e-05	0.000130188	8.1225e-06	1.521e-05	3.28329e-05	1.0609e-06	5.184e-07	9.29296e-05
48.2	0.04269	0.04981	0.0487	0.0374	0.02923	0.03248	0.02798	0.00896		48.2	0.0377	0.0408	0.0423	0.034	0.0239	0.0317	0.0277	0.0171		0.00499	0.00901	0.0064	0.0034	0.00533	0.00078	0.00028	-0.00814		2.49001e-05	8.11801e-05	4.096e-05	1.156e-05	2.84089e-05	6.084e-07	7.84e-08	6.62596e-05
48.4	0.04459	0.05231	0.04615	0.0396	0.02468	0.03468	0.02628	0.00896		48.4	0.0373	0.0408	0.042	0.0337	0.0238	0.0314	0.0276	0.0171		0.00729	0.01151	0.00415	0.0059	0.00088	0.00328	-0.00132	-0.00814		5.31441e-05	0.00013248	1.72225e-05	3.481e-05	7.744e-07	1.07584e-05	1.7424e-06	6.62596e-05
48.6	0.04489	0.05211	0.04795	0.0353	0.02278	0.03363	0.02608	0.01151		48.6	0.0372	0.041	0.0418	0.0333	0.0237	0.0311	0.0276	0.0171		0.00769	0.01111	0.00615	0.002	-0.00092	0.00253	-0.00152	-0.00559		5.91361e-05	0.000123432	3.78225e-05	4e-06	8.464e-07	6.4009e-06	2.3104e-06	3.12481e-05
48.8	0.04354	0.04961	0.0485	0.03385	0.02673	0.03263	0.02638	0.00766		48.8	0.0372	0.0411	0.0418	0.033	0.0235	0.0309	0.0275	0.0171		0.00634	0.00851	0.0067	0.00085	0.00323	0.00173	-0.00112	-0.00944		4.01956e-05	7.24201e-05	4.489e-05	7.225e-07	1.04329e-05	2.9929e-06	1.2544e-06	8.91136e-05
49	0.04274	0.05016	0.04595	0.03295	0.02728	0.03193	0.02558	0.00691		49	0.0373	0.0411	0.0419	0.0328	0.0233	0.0309	0.0273	0.0171		0.00544	0.00906	0.00405	0.00015	0.00398	0.00103	-0.00172	-0.01019		2.95936e-05	8.20836e-05	1.64025e-05	2.25e-08	1.58404e-05	1.0609e-06	2.9584e-06	0.000103836
49.2	0.04394	0.05191	0.0443	0.03685	0.03073	0.03128	0.02598	0.00726		49.2	0.0374	0.041	0.0419	0.0327	0.0231	0.031	0.0272	0.0171		0.00654	0.01091	0.0024	0.00415	0.00763	0.00028	-0.00122	-0.00984		4.27716e-05	0.000119028	5.76e-06	1.72225e-05	5.82169e-05	7.84e-08	1.4884e-06	9.68256e-05
49.4	0.04344	0.05251	0.0434	0.0367	0.02888	0.03313	0.02588	0.01131		49.4	0.0374	0.0409	0.0418	0.0328	0.023	0.0311	0.027	0.0171		0.00604	0.01161	0.0016	0.0039	0.00588	0.00203	-0.00112	-0.00579		3.64816e-05	0.000134792	2.56e-06	1.521e-05	3.45744e-05	4.1209e-06	1.2544e-06	3.35241e-05
49.6	0.04304	0.05251	0.0433	0.0361	0.02738	0.03453	0.02753	0.01041		49.6	0.0372	0.0408	0.0417	0.033	0.023	0.0312	0.0269	0.017		0.00584	0.01171	0.0016	0.0031	0.00438	0.00333	0.00063	-0.00659		3.41056e-05	0.000137124	2.56e-06	9.61e-06	1.91844e-05	1.10889e-05	3.969e-07	4.34281e-05
49.8	0.04249	0.05171	0.04445	0.03975	0.02538	0.03398	0.02883	0.00971		49.8	0.037	0.0406	0.0416	0.0331	0.0229	0.0312	0.0268	0.0169		0.00549	0.01111	0.00285	0.00665	0.00248	0.00278	0.00203	-0.00719		3.01401e-05	0.000123432	8.1225e-06	4.42225e-05	6.1504e-06	7.7284e-06	4.1209e-06	5.16961e-05
50	0.04239	0.05001	0.045	0.0376	0.02483	0.03468	0.02748	0.00906		50	0.0367	0.0404	0.0415	0.033	0.0229	0.0312	0.0268	0.0169		0.00569	0.00961	0.0035	0.0046	0.00193	0.00348	0.00068	-0.00784		3.23761e-05	9.23521e-05	1.225e-05	2.116e-05	3.7249e-06	1.21104e-05	4.624e-07	6.14656e-05
50.2	0.04259	0.05041	0.04595	0.0335	0.02613	0.03388	0.02698	0.00796		50.2	0.0363	0.0402	0.0415	0.0329	0.0228	0.031	0.0268	0.0169		0.00629	0.01021	0.00445	0.0006	0.00333	0.00288	0.00018	-0.00894		3.95641e-05	0.000104244	1.98025e-05	3.6e-07	1.10889e-05	8.2944e-06	3.24e-08	7.99236e-05
50.4	0.04254	0.04936	0.04655	0.0344	0.02563	0.03033	0.02438	0.00691		50.4	0.036	0.0402	0.0413	0.0327	0.0227	0.0309	0.0268	0.0169		0.00654	0.00916	0.00525	0.0017	0.00293	-0.00057	-0.00242	-0.00999		4.27716e-05	8.39056e-05	2.75625e-05	2.89e-06	8.5849e-06	3.249e-07	5.8564e-06	9.98001e-05
50.6	0.04204	0.04721	0.0469	0.03245	0.02723	0.03223	0.02578	0.00696		50.6	0.0359	0.0403	0.041	0.0325	0.0226	0.0307	0.0267	0.0168		0.00614	0.00691	0.0059	-5e-05	0.00463	0.00153	-0.00092	-0.00984		3.76996e-05	4.77481e-05	3.481e-05	2.5e-09	2.14369e-05	2.3409e-06	8.464e-07	9.68256e-05
50.8	0.04019	0.04906	0.0447	0.03315	0.02708	0.03233	0.02558	0.01161		50.8	0.0359	0.0404	0.0409	0.0323	0.0225	0.0306	0.0267	0.0167		0.00429	0.00866	0.0038	0.00085	0.00458	0.00173	-0.00112	-0.00509		1.84041e-05	7.49956e-05	1.444e-05	7.225e-07	2.09764e-05	2.9929e-06	1.2544e-06	2.59081e-05
51	0.04139	0.05221	0.0451	0.03345	0.02838	0.03128	0.02553	0.00841		51	0.036	0.0404	0.0408	0.0321	0.0224	0.0304	0.0266	0.0168		0.00539	0.01181	0.0043	0.00135	0.00598	0.00088	-0.00107	-0.00839		2.90521e-05	0.000139476	1.849e-05	1.8225e-06	3.57604e-05	7.744e-07	1.1449e-06	7.03921e-05
51.2	0.04239	0.05371	0.04835	0.03225	0.02573	0.03063	0.02433	0.00726		51.2	0.0361	0.0403	0.0407	0.0319	0.0223	0.0302	0.0264	0.0168		0.00629	0.01341	0.00765	0.00035	0.00343	0.00043	-0.00207	-0.00954		3.95641e-05	0.000179828	5.85225e-05	1.225e-07	1.17649e-05	1.849e-07	4.2849e-06	9.10116e-05
51.4	0.04139	0.05551	0.04905	0.03665	0.02133	0.03273	0.02803	0.00786		51.4	0.0362	0.0401	0.0407	0.0318	0.0223	0.0301	0.0264	0.0167		0.00519	0.01541	0.00835	0.00485	-0.00097	0.00263	0.00163	-0.00884		2.69361e-05	0.000237468	6.97225e-05	2.35225e-05	9.409e-07	6.9169e-06	2.6569e-06	7.81456e-05
51.6	0.04179	0.05151	0.04905	0.03475	0.02613	0.03153	0.02648	0.00711		51.6	0.0361	0.0397	0.0407	0.0317	0.0223	0.0301	0.0263	0.0166		0.00569	0.01181	0.00835	0.00305	0.00383	0.00143	0.00018	-0.00949		3.23761e-05	0.000139476	6.97225e-05	9.3025e-06	1.46689e-05	2.0449e-06	3.24e-08	9.00601e-05
51.8	0.04184	0.05046	0.04605	0.03135	0.02563	0.03168	0.02643	0.01131		51.8	0.036	0.0394	0.0406	0.0318	0.0223	0.0301	0.0262	0.0165		0.00584	0.01106	0.00545	-0.00045	0.00333	0.00158	0.00023	-0.00519		3.41056e-05	0.000122324	2.97025e-05	2.025e-07	1.10889e-05	2.4964e-06	5.29e-08	2.69361e-05
52	0.04174	0.04981	0.0467	0.0337	0.02628	0.03248	0.02408	0.01006		52	0.0359	0.0392	0.0404	0.0318	0.0223	0.0301	0.0262	0.0165		0.00584	0.01061	0.0063	0.0019	0.00398	0.00238	-0.00212	-0.00644		3.41056e-05	0.000112572	3.969e-05	3.61e-06	1.58404e-05	5.6644e-06	4.4944e-06	4.14736e-05
52.2	0.04159	0.05051	0.0458	0.03215	0.02628	0.03213	0.02638	0.00931		52.2	0.0356	0.0394	0.0403	0.0319	0.0223	0.0301	0.0261	0.0166		0.00599	0.01111	0.0055	0.00025	0.00398	0.00203	0.00028	-0.00729		3.58801e-05	0.000123432	3.025e-05	6.25e-08	1.58404e-05	4.1209e-06	7.84e-08	5.31441e-05
52.4	0.04234	0.04901	0.0442	0.03025	0.02803	0.03283	0.02643	0.00961		52.4	0.0354	0.0396	0.04	0.0318	0.0222	0.0301	0.0261	0.0166		0.00694	0.00941	0.0042	-0.00155	0.00583	0.00273	0.00033	-0.00699		4.81636e-05	8.85481e-05	1.764e-05	2.4025e-06	3.39889e-05	7.4529e-06	1.089e-07	4.88601e-05
52.6	0.04139	0.04846	0.0439	0.0321	0.02723	0.03203	0.02578	0.00716		52.6	0.0355	0.04	0.04	0.0316	0.022	0.03	0.026	0.0165		0.00589	0.00846	0.0039	0.0005	0.00523	0.00203	-0.00022	-0.00934		3.46921e-05	7.15716e-05	1.521e-05	2.5e-07	2.73529e-05	4.1209e-06	4.84e-08	8.72356e-05
52.8	0.04189	0.04981	0.0443	0.0347	0.02803	0.03218	0.02773	0.00786		52.8	0.0356	0.0402	0.0401	0.0314	0.0219	0.0298	0.026	0.0165		0.00629	0.00961	0.0042	0.0033	0.00613	0.00238	0.00173	-0.00864		3.95641e-05	9.23521e-05	1.764e-05	1.089e-05	3.75769e-05	5.6644e-06	2.9929e-06	7.46496e-05
53	0.04054	0.04801	0.04655	0.0356	0.02718	0.03193	0.02558	0.01456		53	0.0357	0.0402	0.0402	0.0313	0.0218	0.0296	0.0258	0.0165		0.00484	0.00781	0.00635	0.0043	0.00538	0.00233	-0.00022	-0.00194		2.34256e-05	6.09961e-05	4.03225e-05	1.849e-05	2.89444e-05	5.4289e-06	4.84e-08	3.7636e-06
53.2	0.04124	0.04881	0.04805	0.0364	0.02553	0.03183	0.02553	0.01186		53.2	0.0359	0.0401	0.0403	0.0312	0.0218	0.0296	0.0257	0.0165		0.00534	0.00871	0.00775	0.0052	0.00373	0.00223	-0.00017	-0.00464		2.85156e-05	7.58641e-05	6.00625e-05	2.704e-05	1.39129e-05	4.9729e-06	2.89e-08	2.15296e-05
53.4	0.04109	0.05056	0.046	0.0338	0.02408	0.03078	0.02488	0.01056		53.4	0.036	0.04	0.0403	0.0313	0.0219	0.0295	0.0257	0.0165		0.00509	0.01056	0.0057	0.0025	0.00218	0.00128	-0.00082	-0.00594		2.59081e-05	0.000111514	3.249e-05	6.25e-06	4.7524e-06	1.6384e-06	6.724e-07	3.52836e-05
53.6	0.03969	0.04791	0.0456	0.0334	0.02448	0.02938	0.02538	0.00836		53.6	0.036	0.0399	0.0403	0.0314	0.0219	0.0296	0.0256	0.0165		0.00369	0.00801	0.0053	0.002	0.00258	-0.00022	-0.00022	-0.00814		1.36161e-05	6.41601e-05	2.809e-05	4e-06	6.6564e-06	4.84e-08	4.84e-08	6.62596e-05
53.8	0.04064	0.04806	0.0439	0.0344	0.02483	0.02958	0.02413	0.00651		53.8	0.0359	0.0398	0.0403	0.0315	0.022	0.0296	0.0256	0.0165		0.00474	0.00826	0.0036	0.0029	0.00283	-2e-05	-0.00147	-0.00999		2.24676e-05	6.82276e-05	1.296e-05	8.41e-06	8.0089e-06	4e-10	2.1609e-06	9.98001e-05
54	0.04084	0.04751	0.04185	0.03395	0.02583	0.02893	0.02758	0.00726		54	0.0359	0.0398	0.0403	0.0315	0.022	0.0296	0.0257	0.0164		0.00494	0.00771	0.00155	0.00245	0.00383	-0.00067	0.00188	-0.00914		2.44036e-05	5.94441e-05	2.4025e-06	6.0025e-06	1.46689e-05	4.489e-07	3.5344e-06	8.35396e-05
54.2	0.04159	0.04726	0.0421	0.034	0.02768	0.03103	0.02573	0.00611		54.2	0.0358	0.0399	0.0403	0.0314	0.0219	0.0295	0.0257	0.0164		0.00579	0.00736	0.0018	0.0026	0.00578	0.00153	3e-05	-0.01029		3.35241e-05	5.41696e-05	3.24e-06	6.76e-06	3.34084e-05	2.3409e-06	9e-10	0.000105884
54.4	0.04069	0.04511	0.04545	0.03155	0.02603	0.03038	0.02628	0.01371		54.4	0.0357	0.04	0.0404	0.0313	0.0217	0.0295	0.0256	0.0163		0.00499	0.00511	0.00505	0.00025	0.00433	0.00088	0.00068	-0.00259		2.49001e-05	2.61121e-05	2.55025e-05	6.25e-08	1.87489e-05	7.744e-07	4.624e-07	6.7081e-06
54.6	0.04009	0.04501	0.045	0.0318	0.02658	0.02943	0.02558	0.01146		54.6	0.0356	0.0399	0.0403	0.0312	0.0216	0.0296	0.0256	0.0164		0.00449	0.00511	0.0047	0.0006	0.00498	-0.00017	-2e-05	-0.00494		2.01601e-05	2.61121e-05	2.209e-05	3.6e-07	2.48004e-05	2.89e-08	4e-10	2.44036e-05
54.8	0.04179	0.04626	0.0444	0.0348	0.02683	0.03263	0.02483	0.01091		54.8	0.0356	0.04	0.0403	0.0312	0.0215	0.0296	0.0255	0.0164		0.00619	0.00626	0.0041	0.0036	0.00533	0.00303	-0.00067	-0.00549		3.83161e-05	3.91876e-05	1.681e-05	1.296e-05	2.84089e-05	9.1809e-06	4.489e-07	3.01401e-05
55	0.04049	0.04616	0.0447	0.03425	0.02593	0.03088	0.02518	0.00861		55	0.0356	0.0401	0.0401	0.0313	0.0215	0.0296	0.0254	0.0164		0.00489	0.00606	0.0046	0.00295	0.00443	0.00128	-0.00022	-0.00779		2.39121e-05	3.67236e-05	2.116e-05	8.7025e-06	1.96249e-05	1.6384e-06	4.84e-08	6.06841e-05
55.2	0.04019	0.04836	0.0437	0.0363	0.02438	0.03133	0.02708	0.00791		55.2	0.0357	0.0399	0.04	0.0313	0.0216	0.0295	0.0254	0.0164		0.00449	0.00846	0.0037	0.005	0.00278	0.00183	0.00168	-0.00849		2.01601e-05	7.15716e-05	1.369e-05	2.5e-05	7.7284e-06	3.3489e-06	2.8224e-06	7.20801e-05
55.4	0.03954	0.04836	0.04	0.03365	0.02603	0.03108	0.02533	0.00911		55.4	0.0358	0.0398	0.04	0.0313	0.0216	0.0294	0.0254	0.0163		0.00374	0.00856	0	0.00235	0.00443	0.00168	-7e-05	-0.00719		1.39876e-05	7.32736e-05	0	5.5225e-06	1.96249e-05	2.8224e-06	4.9e-09	5.16961e-05
55.6	0.04109	0.04606	0.0408	0.03345	0.02588	0.03258	0.02628	0.00806		55.6	0.0357	0.0396	0.0401	0.0313	0.0217	0.0293	0.0254	0.0163		0.00539	0.00646	0.0007	0.00215	0.00418	0.00328	0.00088	-0.00824		2.90521e-05	4.17316e-05	4.9e-07	4.6225e-06	1.74724e-05	1.07584e-05	7.744e-07	6.78976e-05
55.8	0.03924	0.04586	0.0403	0.028	0.02653	0.03048	0.02703	0.01056		55.8	0.0357	0.0395	0.0401	0.0312	0.0217	0.0292	0.0254	0.0164		0.00354	0.00636	0.0002	-0.0032	0.00483	0.00128	0.00163	-0.00584		1.25316e-05	4.04496e-05	4e-08	1.024e-05	2.33289e-05	1.6384e-06	2.6569e-06	3.41056e-05
56	0.04089	0.04686	0.04255	0.03015	0.02328	0.03063	0.02338	0.01326		56	0.0356	0.0394	0.04	0.0312	0.0217	0.0292	0.0254	0.0164		0.00529	0.00746	0.00255	-0.00105	0.00158	0.00143	-0.00202	-0.00314		2.79841e-05	5.56516e-05	6.5025e-06	1.1025e-06	2.4964e-06	2.0449e-06	4.0804e-06	9.8596e-06
56.2	0.03964	0.04566	0.0474	0.0316	0.02688	0.03163	0.02453	0.01221		56.2	0.0355	0.0396	0.04	0.0312	0.0217	0.0292	0.0254	0.0164		0.00414	0.00606	0.0074	0.0004	0.00518	0.00243	-0.00087	-0.00419		1.71396e-05	3.67236e-05	5.476e-05	1.6e-07	2.68324e-05	5.9049e-06	7.569e-07	1.75561e-05
56.4	0.04044	0.04701	0.04665	0.03495	0.02383	0.03103	0.02658	0.00876		56.4	0.0355	0.0398	0.04	0.0312	0.0217	0.0293	0.0253	0.0164		0.00494	0.00721	0.00665	0.00375	0.00213	0.00173	0.00128	-0.00764		2.44036e-05	5.19841e-05	4.42225e-05	1.40625e-05	4.5369e-06	2.9929e-06	1.6384e-06	5.83696e-05
56.6	0.03984	0.04766	0.0441	0.0367	0.02303	0.02678	0.02953	0.00726		56.6	0.0355	0.0399	0.0401	0.0312	0.0216	0.0293	0.0253	0.0163		0.00434	0.00776	0.004	0.0055	0.00143	-0.00252	0.00423	-0.00904		1.88356e-05	6.02176e-05	1.6e-05	3.025e-05	2.0449e-06	6.3504e-06	1.78929e-05	8.17216e-05
56.8	0.03959	0.04881	0.04155	0.03715	0.02368	0.03143	0.02478	0.00686		56.8	0.0355	0.0399	0.0401	0.0311	0.0214	0.0293	0.0253	0.0162		0.00409	0.00891	0.00145	0.00605	0.00228	0.00213	-0.00052	-0.00934		1.67281e-05	7.93881e-05	2.1025e-06	3.66025e-05	5.1984e-06	4.5369e-06	2.704e-07	8.72356e-05
57	0.03969	0.04786	0.04115	0.035	0.02653	0.03098	0.02458	0.00656		57	0.0354	0.0398	0.0402	0.0311	0.0214	0.0293	0.0253	0.0162		0.00429	0.00806	0.00095	0.0039	0.00513	0.00168	-0.00072	-0.00964		1.84041e-05	6.49636e-05	9.025e-07	1.521e-05	2.63169e-05	2.8224e-06	5.184e-07	9.29296e-05
57.2	0.04039	0.04791	0.0403	0.03245	0.02473	0.03228	0.02583	0.01061		57.2	0.0353	0.0397	0.0402	0.031	0.0213	0.0294	0.0252	0.0162		0.00509	0.00821	0.0001	0.00145	0.00343	0.00288	0.00063	-0.00559		2.59081e-05	6.74041e-05	1e-08	2.1025e-06	1.17649e-05	8.2944e-06	3.969e-07	3.12481e-05
57.4	0.04034	0.04641	0.044	0.0335	0.02658	0.03008	0.02678	0.00926		57.4	0.0353	0.0396	0.04	0.0311	0.0213	0.0294	0.0252	0.0162		0.00504	0.00681	0.004	0.0024	0.00528	0.00068	0.00158	-0.00694		2.54016e-05	4.63761e-05	1.6e-05	5.76e-06	2.78784e-05	4.624e-07	2.4964e-06	4.81636e-05
57.6	0.03999	0.04511	0.0445	0.0347	0.02628	0.03228	0.02723	0.00916		57.6	0.0353	0.0396	0.0399	0.0311	0.0214	0.0294	0.0251	0.0162		0.00469	0.00551	0.0046	0.0036	0.00488	0.00288	0.00213	-0.00704		2.19961e-05	3.03601e-05	2.116e-05	1.296e-05	2.38144e-05	8.2944e-06	4.5369e-06	4.95616e-05
57.8	0.04029	0.04691	0.04435	0.03565	0.02483	0.03128	0.02218	0.00806		57.8	0.0353	0.0397	0.0398	0.0311	0.0215	0.0293	0.0251	0.0163		0.00499	0.00721	0.00455	0.00455	0.00333	0.00198	-0.00292	-0.00824		2.49001e-05	5.19841e-05	2.07025e-05	2.07025e-05	1.10889e-05	3.9204e-06	8.5264e-06	6.78976e-05
58	0.03929	0.04796	0.0429	0.03775	0.02178	0.03178	0.02563	0.00641		58	0.0353	0.0397	0.0398	0.0311	0.0215	0.0291	0.0251	0.0163		0.00399	0.00826	0.0031	0.00665	0.00028	0.00268	0.00053	-0.00989		1.59201e-05	6.82276e-05	9.61e-06	4.42225e-05	7.84e-08	7.1824e-06	2.809e-07	9.78121e-05
58.2	0.03889	0.04771	0.04365	0.03545	0.02333	0.03128	0.02398	0.00636		58.2	0.0354	0.0396	0.0399	0.0309	0.0215	0.029	0.0252	0.0162		0.00349	0.00811	0.00375	0.00455	0.00183	0.00228	-0.00122	-0.00984		1.21801e-05	6.57721e-05	1.40625e-05	2.07025e-05	3.3489e-06	5.1984e-06	1.4884e-06	9.68256e-05
58.4	0.03924	0.04696	0.0409	0.03015	0.02478	0.03193	0.02653	0.00866		58.4	0.0353	0.0395	0.04	0.0308	0.0214	0.0289	0.0252	0.0161		0.00394	0.00746	0.0009	-0.00065	0.00338	0.00303	0.00133	-0.00744		1.55236e-05	5.56516e-05	8.1e-07	4.225e-07	1.14244e-05	9.1809e-06	1.7689e-06	5.53536e-05
58.6	0.04034	0.04641	0.0404	0.03315	0.02518	0.03053	0.02438	0.01056		58.6	0.0352	0.0394	0.04	0.0308	0.0214	0.0289	0.0251	0.0162		0.00514	0.00701	0.0004	0.00235	0.00378	0.00163	-0.00072	-0.00564		2.64196e-05	4.91401e-05	1.6e-07	5.5225e-06	1.42884e-05	2.6569e-06	5.184e-07	3.18096e-05
58.8	0.03974	0.04586	0.04215	0.03125	0.02648	0.03018	0.02423	0.00891		58.8	0.0351	0.0394	0.0399	0.0308	0.0213	0.029	0.0251	0.0162		0.00464	0.00646	0.00225	0.00045	0.00518	0.00118	-0.00087	-0.00729		2.15296e-05	4.17316e-05	5.0625e-06	2.025e-07	2.68324e-05	1.3924e-06	7.569e-07	5.31441e-05
59										59	0.0351	0.0394	0.0398	0.0309	0.0213	0.0291	0.025	0.0162		-0.0351	-0.0394	-0.0398	-0.0309	-0.0213	-0.0291	-0.025	-0.0162		0.00123201	0.00155236	0.00158404	0.00095481	0.00045369	0.00084681	0.000625	0.00026244
59.2										59.2	0.0351	0.0394	0.0397	0.0309	0.0213	0.0292	0.025	0.0163		-0.0351	-0.0394	-0.0397	-0.0309	-0.0213	-0.0292	-0.025	-0.0163		0.00123201	0.00155236	0.00157609	0.00095481	0.00045369	0.00085264	0.000625	0.00026569
59.4										59.4	0.0351	0.0393	0.0397	0.0309	0.0213	0.0292	0.025	0.0162		-0.0351	-0.0393	-0.0397	-0.0309	-0.0213	-0.0292	-0.025	-0.0162		0.00123201	0.00154449	0.00157609	0.00095481	0.00045369	0.00085264	0.000625	0.00026244
59.6										59.6	0.035	0.039	0.0397	0.0309	0.0212	0.0291	0.025	0.0161		-0.035	-0.039	-0.0397	-0.0309	-0.0212	-0.0291	-0.025	-0.0161		0.001225	0.001521	0.00157609	0.00095481	0.00044944	0.00084681	0.000625	0.00025921
59.8										59.8	0.0349	0.0388	0.0396	0.0308	0.0212	0.029	0.025	0.0161		-0.0349	-0.0388	-0.0396	-0.0308	-0.0212	-0.029	-0.025	-0.0161		0.00121801	0.00150544	0.00156816	0.00094864	0.00044944	0.000841	0.000625	0.00025921
											0.0347	0.0386	0.0395	0.0307	0.0212	0.0289	0.025	0.0161		-0.0347	-0.0386	-0.0395	-0.0307	-0.0212	-0.0289	-0.025	-0.0161		0.00120409	0.00148996	0.00156025	0.00094249	0.00044944	0.00083521	0.000625	0.00025921

## Sheet: RMSE_MeshSize0.5
t	S3	S4	S5	S6	S7	S8	S9	S10		t	HEC_1B_5_P3	HEC_1B_5_P4	HEC_1B_5_P5	HEC_1B_5_P6	HEC_1B_5_P7	HEC_1B_5_P8	HEC_1B_5_P9	HEC_1B_5_P10		Error_3	Error_4	Error_5	Error_6	Error_7	Error_8	Error_9	Error_10		Error^2_3	Error^2_4	Error^2_5	Error^2_6	Error^2_7	Error^2_8	Error^2_9	Error^2_10		RMSE_3	RMSE_4	RMSE_5	RMSE_6	RMSE_7	RMSE_8	RMSE_9	RMSE_10
0	-1e-05	-4e-05	0	-0.00015	-2e-05	-7e-05	3e-05	1e-05		0	0	0	0	0	0	0	0	0		-1e-05	-4e-05	0	-0.00015	-2e-05	-7e-05	3e-05	1e-05		1e-10	1.6e-09	0	2.25e-08	4e-10	4.9e-09	9e-10	1e-10		1.09267	1.17534	0.90676	0.730394	0.530796	0.543968	0.469447	0.709338
0.2	-6e-05	1e-05	-5e-05	0.00015	8e-05	0.00013	-0.00017	1e-05		0.2	0	0	0	0	0	0	0	0		-6e-05	1e-05	-5e-05	0.00015	8e-05	0.00013	-0.00017	1e-05		3.6e-09	1e-10	2.5e-09	2.25e-08	6.4e-09	1.69e-08	2.89e-08	1e-10
0.4	0.00014	0.00011	5e-05	5e-05	3e-05	3e-05	-2e-05	1e-05		0.4	0	0	0	0	0	0	0	0		0.00014	0.00011	5e-05	5e-05	3e-05	3e-05	-2e-05	1e-05		1.96e-08	1.21e-08	2.5e-09	2.5e-09	9e-10	9e-10	4e-10	1e-10
0.6	-1e-05	-9e-05	-0.0001	-5e-05	-7e-05	8e-05	-2e-05	-4e-05		0.6	0	0	0	0	0	0	0	0		-1e-05	-9e-05	-0.0001	-5e-05	-7e-05	8e-05	-2e-05	-4e-05		1e-10	8.1e-09	1e-08	2.5e-09	4.9e-09	6.4e-09	4e-10	1.6e-09
0.8	-0.00016	-4e-05	5e-05	-5e-05	-0.00012	8e-05	-2e-05	6e-05		0.8	0	0	0	0	0	0	0	0		-0.00016	-4e-05	5e-05	-5e-05	-0.00012	8e-05	-2e-05	6e-05		2.56e-08	1.6e-09	2.5e-09	2.5e-09	1.44e-08	6.4e-09	4e-10	3.6e-09
1	4e-05	1e-05	0.00015	-0.00015	-0.00017	0.00018	-7e-05	1e-05		1	0	0	0	0	0	0	0	0		4e-05	1e-05	0.00015	-0.00015	-0.00017	0.00018	-7e-05	1e-05		1.6e-09	1e-10	2.25e-08	2.25e-08	2.89e-08	3.24e-08	4.9e-09	1e-10
1.2	-6e-05	0.00011	-0.0001	0.0002	0.00013	8e-05	-2e-05	-4e-05		1.2	0	0	0	0	0	0	0	0		-6e-05	0.00011	-0.0001	0.0002	0.00013	8e-05	-2e-05	-4e-05		3.6e-09	1.21e-08	1e-08	4e-08	1.69e-08	6.4e-09	4e-10	1.6e-09
1.4	0.00039	-9e-05	0.00015	0	0.00013	0.00033	-7e-05	-4e-05		1.4	0	0	0	0	0	0	0	0		0.00039	-9e-05	0.00015	0	0.00013	0.00033	-7e-05	-4e-05		1.521e-07	8.1e-09	2.25e-08	0	1.69e-08	1.089e-07	4.9e-09	1.6e-09
1.6	-6e-05	1e-05	5e-05	-5e-05	8e-05	3e-05	-2e-05	-4e-05		1.6	0	0	0	0	0	0	0	0		-6e-05	1e-05	5e-05	-5e-05	8e-05	3e-05	-2e-05	-4e-05		3.6e-09	1e-10	2.5e-09	2.5e-09	6.4e-09	9e-10	4e-10	1.6e-09
1.8	-0.00016	1e-05	0.0001	-5e-05	-2e-05	-2e-05	3e-05	-4e-05		1.8	0	0	0	0	0	0	0	0		-0.00016	1e-05	0.0001	-5e-05	-2e-05	-2e-05	3e-05	-4e-05		2.56e-08	1e-10	1e-08	2.5e-09	4e-10	4e-10	9e-10	1.6e-09
2	9e-05	0.00011	0	-0.00015	-2e-05	-7e-05	3e-05	1e-05		2	0	0	0	0	0	0	0	0		9e-05	0.00011	0	-0.00015	-2e-05	-7e-05	3e-05	1e-05		8.1e-09	1.21e-08	0	2.25e-08	4e-10	4.9e-09	9e-10	1e-10
2.2	-1e-05	-0.00014	0	0.00015	8e-05	-0.00017	3e-05	6e-05		2.2	0	0	0	0	0	0	0	0		-1e-05	-0.00014	0	0.00015	8e-05	-0.00017	3e-05	6e-05		1e-10	1.96e-08	0	2.25e-08	6.4e-09	2.89e-08	9e-10	3.6e-09
2.4	9e-05	1e-05	-0.00015	0	-2e-05	-7e-05	8e-05	6e-05		2.4	0	0	0	0	0	0	0	0		9e-05	1e-05	-0.00015	0	-2e-05	-7e-05	8e-05	6e-05		8.1e-09	1e-10	2.25e-08	0	4e-10	4.9e-09	6.4e-09	3.6e-09
2.6	-6e-05	1e-05	5e-05	0	-7e-05	-0.00022	8e-05	0.00011		2.6	0	0	0	0	0	0	0	0		-6e-05	1e-05	5e-05	0	-7e-05	-0.00022	8e-05	0.00011		3.6e-09	1e-10	2.5e-09	0	4.9e-09	4.84e-08	6.4e-09	1.21e-08
2.8	-0.00016	0.00011	-0.0001	-5e-05	-0.00012	-0.00012	0.00013	0.00011		2.8	0	0	0	0	0	0	0	0		-0.00016	0.00011	-0.0001	-5e-05	-0.00012	-0.00012	0.00013	0.00011		2.56e-08	1.21e-08	1e-08	2.5e-09	1.44e-08	1.44e-08	1.69e-08	1.21e-08
3	4e-05	-9e-05	0	-0.00015	-0.00012	-0.00017	0.00013	0.00011		3	0	0	0	0	0	0	0	0		4e-05	-9e-05	0	-0.00015	-0.00012	-0.00017	0.00013	0.00011		1.6e-09	8.1e-09	0	2.25e-08	1.44e-08	2.89e-08	1.69e-08	1.21e-08
3.2	-1e-05	-4e-05	-0.0001	0.00015	0.00023	-7e-05	0.00028	0.00011		3.2	0	0	0	0	0	0	0	0		-1e-05	-4e-05	-0.0001	0.00015	0.00023	-7e-05	0.00028	0.00011		1e-10	1.6e-09	1e-08	2.25e-08	5.29e-08	4.9e-09	7.84e-08	1.21e-08
3.4	-0.00011	-4e-05	0.0001	0	0.00013	-0.00017	3e-05	0.00036		3.4	0	0	0	0	0	0	0	0		-0.00011	-4e-05	0.0001	0	0.00013	-0.00017	3e-05	0.00036		1.21e-08	1.6e-09	1e-08	0	1.69e-08	2.89e-08	9e-10	1.296e-07
3.6	-6e-05	0.00011	0.0001	0	-2e-05	-7e-05	-0.00012	0.00011		3.6	0	0	0	0	0	0	0	0		-6e-05	0.00011	0.0001	0	-2e-05	-7e-05	-0.00012	0.00011		3.6e-09	1.21e-08	1e-08	0	4e-10	4.9e-09	1.44e-08	1.21e-08
3.8	-0.00011	-9e-05	0	-0.0001	-2e-05	-0.00017	-0.00012	1e-05		3.8	0	0	0	0	0	0	0	0		-0.00011	-9e-05	0	-0.0001	-2e-05	-0.00017	-0.00012	1e-05		1.21e-08	8.1e-09	0	1e-08	4e-10	2.89e-08	1.44e-08	1e-10
4	9e-05	6e-05	0.0003	-0.0002	-2e-05	-7e-05	-0.00022	-9e-05		4	0	0	0	0	0	0	0	0		9e-05	6e-05	0.0003	-0.0002	-2e-05	-7e-05	-0.00022	-9e-05		8.1e-09	3.6e-09	9e-08	4e-08	4e-10	4.9e-09	4.84e-08	8.1e-09
4.2	-6e-05	1e-05	-5e-05	0.0001	3e-05	-0.00017	-0.00012	-0.00014		4.2	0	0	0	0	0	0	0	0		-6e-05	1e-05	-5e-05	0.0001	3e-05	-0.00017	-0.00012	-0.00014		3.6e-09	1e-10	2.5e-09	1e-08	9e-10	2.89e-08	1.44e-08	1.96e-08
4.4	-0.00016	0.00011	0.00015	0	-2e-05	3e-05	-0.00012	-0.00014		4.4	0	0	0	0	0	0	0	0		-0.00016	0.00011	0.00015	0	-2e-05	3e-05	-0.00012	-0.00014		2.56e-08	1.21e-08	2.25e-08	0	4e-10	9e-10	1.44e-08	1.96e-08
4.6	-6e-05	-0.00014	-5e-05	-0.0001	-7e-05	-0.00012	-7e-05	-0.00014		4.6	0	0	0	0	0	0	0	0		-6e-05	-0.00014	-5e-05	-0.0001	-7e-05	-0.00012	-7e-05	-0.00014		3.6e-09	1.96e-08	2.5e-09	1e-08	4.9e-09	1.44e-08	4.9e-09	1.96e-08
4.8	-0.00011	1e-05	0.0001	-0.0001	-0.00017	3e-05	-0.00012	-0.00014		4.8	0	0	0	0	0	0	0	0		-0.00011	1e-05	0.0001	-0.0001	-0.00017	3e-05	-0.00012	-0.00014		1.21e-08	1e-10	1e-08	1e-08	2.89e-08	9e-10	1.44e-08	1.96e-08
5	9e-05	1e-05	-0.0001	-0.0002	-7e-05	-7e-05	-0.00012	-0.00014		5	0	0	0	0	0	0	0	0		9e-05	1e-05	-0.0001	-0.0002	-7e-05	-7e-05	-0.00012	-0.00014		8.1e-09	1e-10	1e-08	4e-08	4.9e-09	4.9e-09	1.44e-08	1.96e-08
5.2	-1e-05	0.00016	5e-05	0.0001	0.00013	3e-05	-7e-05	-9e-05		5.2	0	0	0	0	0	0	0	0		-1e-05	0.00016	5e-05	0.0001	0.00013	3e-05	-7e-05	-9e-05		1e-10	2.56e-08	2.5e-09	1e-08	1.69e-08	9e-10	4.9e-09	8.1e-09
5.4	-0.00021	-0.00014	-0.0001	-5e-05	0.00013	-7e-05	-2e-05	-9e-05		5.4	0	0	0	0	0	0	0	0		-0.00021	-0.00014	-0.0001	-5e-05	0.00013	-7e-05	-2e-05	-9e-05		4.41e-08	1.96e-08	1e-08	2.5e-09	1.69e-08	4.9e-09	4e-10	8.1e-09
5.6	-1e-05	1e-05	0	0	3e-05	8e-05	-2e-05	-4e-05		5.6	0	0	0	0	0	0	0	0		-1e-05	1e-05	0	0	3e-05	8e-05	-2e-05	-4e-05		1e-10	1e-10	0	0	9e-10	6.4e-09	4e-10	1.6e-09
5.8	-6e-05	1e-05	-0.00015	-0.0001	-2e-05	-2e-05	3e-05	-4e-05		5.8	0	0	0	0	0	0	0	0		-6e-05	1e-05	-0.00015	-0.0001	-2e-05	-2e-05	3e-05	-4e-05		3.6e-09	1e-10	2.25e-08	1e-08	4e-10	4e-10	9e-10	1.6e-09
6	9e-05	0.00011	5e-05	-0.00015	-2e-05	0.00028	-2e-05	1e-05		6	0	0	0	0	0	0	0	0		9e-05	0.00011	5e-05	-0.00015	-2e-05	0.00028	-2e-05	1e-05		8.1e-09	1.21e-08	2.5e-09	2.25e-08	4e-10	7.84e-08	4e-10	1e-10
6.2	4e-05	-9e-05	5e-05	5e-05	3e-05	-7e-05	-7e-05	-4e-05		6.2	0	0	0	0	0	0	0	0		4e-05	-9e-05	5e-05	5e-05	3e-05	-7e-05	-7e-05	-4e-05		1.6e-09	8.1e-09	2.5e-09	2.5e-09	9e-10	4.9e-09	4.9e-09	1.6e-09
6.4	-0.00016	1e-05	0.0001	-5e-05	-7e-05	-2e-05	3e-05	-9e-05		6.4	0	0	0	0	0	0	0	0		-0.00016	1e-05	0.0001	-5e-05	-7e-05	-2e-05	3e-05	-9e-05		2.56e-08	1e-10	1e-08	2.5e-09	4.9e-09	4e-10	9e-10	8.1e-09
6.6	4e-05	1e-05	0.00035	0	-7e-05	-7e-05	-7e-05	6e-05		6.6	0	0	0	0	0	0	0	0		4e-05	1e-05	0.00035	0	-7e-05	-7e-05	-7e-05	6e-05		1.6e-09	1e-10	1.225e-07	0	4.9e-09	4.9e-09	4.9e-09	3.6e-09
6.8	-0.00011	0.00011	0	-0.0001	-0.00012	-0.00022	-7e-05	-4e-05		6.8	0	0	0	0	0	0	0	0		-0.00011	0.00011	0	-0.0001	-0.00012	-0.00022	-7e-05	-4e-05		1.21e-08	1.21e-08	0	1e-08	1.44e-08	4.84e-08	4.9e-09	1.6e-09
7	9e-05	-9e-05	0.00015	-5e-05	-2e-05	-0.00017	-7e-05	-4e-05		7	0	0	0	0	0	0	0	0		9e-05	-9e-05	0.00015	-5e-05	-2e-05	-0.00017	-7e-05	-4e-05		8.1e-09	8.1e-09	2.25e-08	2.5e-09	4e-10	2.89e-08	4.9e-09	1.6e-09
7.2	-6e-05	1e-05	0	5e-05	0.00013	-0.00022	-7e-05	1e-05		7.2	0	0	0	0	0	0	0	0		-6e-05	1e-05	0	5e-05	0.00013	-0.00022	-7e-05	1e-05		3.6e-09	1e-10	0	2.5e-09	1.69e-08	4.84e-08	4.9e-09	1e-10
7.4	-0.00016	1e-05	5e-05	-5e-05	8e-05	-0.00012	-2e-05	-4e-05		7.4	0	0	0	0	0	0	0	0		-0.00016	1e-05	5e-05	-5e-05	8e-05	-0.00012	-2e-05	-4e-05		2.56e-08	1e-10	2.5e-09	2.5e-09	6.4e-09	1.44e-08	4e-10	1.6e-09
7.6	-1e-05	0.00016	-0.0001	0	3e-05	-0.00022	-2e-05	1e-05		7.6	0	0	0	0	0	0	0	0		-1e-05	0.00016	-0.0001	0	3e-05	-0.00022	-2e-05	1e-05		1e-10	2.56e-08	1e-08	0	9e-10	4.84e-08	4e-10	1e-10
7.8	-0.00011	-9e-05	5e-05	-0.00015	-2e-05	-7e-05	-2e-05	1e-05		7.8	0	0	0	0	0	0	0	0		-0.00011	-9e-05	5e-05	-0.00015	-2e-05	-7e-05	-2e-05	1e-05		1.21e-08	8.1e-09	2.5e-09	2.25e-08	4e-10	4.9e-09	4e-10	1e-10
8	0.00029	1e-05	-0.00015	0.00015	3e-05	-0.00022	-2e-05	1e-05		8	0	0	0	0	0	0	0	0		0.00029	1e-05	-0.00015	0.00015	3e-05	-0.00022	-2e-05	1e-05		8.41e-08	1e-10	2.25e-08	2.25e-08	9e-10	4.84e-08	4e-10	1e-10
8.2	-0.00011	1e-05	0	0.0001	-2e-05	-7e-05	3e-05	1e-05		8.2	0	0	0	0	0	0	0	0		-0.00011	1e-05	0	0.0001	-2e-05	-7e-05	3e-05	1e-05		1.21e-08	1e-10	0	1e-08	4e-10	4.9e-09	9e-10	1e-10
8.4	-0.00016	0.00021	-0.0002	-5e-05	-2e-05	-0.00022	3e-05	6e-05		8.4	0	0	0	0	0	0	0	0		-0.00016	0.00021	-0.0002	-5e-05	-2e-05	-0.00022	3e-05	6e-05		2.56e-08	4.41e-08	4e-08	2.5e-09	4e-10	4.84e-08	9e-10	3.6e-09
8.6	-1e-05	-0.00014	5e-05	-5e-05	-0.00012	3e-05	8e-05	0.00011		8.6	0	0	0	0	0	0	0	0		-1e-05	-0.00014	5e-05	-5e-05	-0.00012	3e-05	8e-05	0.00011		1e-10	1.96e-08	2.5e-09	2.5e-09	1.44e-08	9e-10	6.4e-09	1.21e-08
8.8	-6e-05	-4e-05	-5e-05	-0.00015	-0.00017	-0.00017	8e-05	6e-05		8.8	0	0	0	0	0	0	0	0		-6e-05	-4e-05	-5e-05	-0.00015	-0.00017	-0.00017	8e-05	6e-05		3.6e-09	1.6e-09	2.5e-09	2.25e-08	2.89e-08	2.89e-08	6.4e-09	3.6e-09
9	4e-05	1e-05	5e-05	0.00025	3e-05	-2e-05	0.00028	0.00011		9	0	0	0	0	0	0	0	0		4e-05	1e-05	5e-05	0.00025	3e-05	-2e-05	0.00028	0.00011		1.6e-09	1e-10	2.5e-09	6.25e-08	9e-10	4e-10	7.84e-08	1.21e-08
9.2	-0.00011	0.00031	0.00035	5e-05	8e-05	-0.00012	3e-05	0.00016		9.2	0	0	0	0	0	0	0	0		-0.00011	0.00031	0.00035	5e-05	8e-05	-0.00012	3e-05	0.00016		1.21e-08	9.61e-08	1.225e-07	2.5e-09	6.4e-09	1.44e-08	9e-10	2.56e-08
9.4	-0.00016	-0.00014	-5e-05	-5e-05	3e-05	-2e-05	-7e-05	0.00016		9.4	0	0	0	0	0	0	0	0		-0.00016	-0.00014	-5e-05	-5e-05	3e-05	-2e-05	-7e-05	0.00016		2.56e-08	1.96e-08	2.5e-09	2.5e-09	9e-10	4e-10	4.9e-09	2.56e-08
9.6	4e-05	-0.00024	0.0001	-5e-05	-2e-05	-0.00012	-0.00017	6e-05		9.6	0	0	0	0	0	0	0	0		4e-05	-0.00024	0.0001	-5e-05	-2e-05	-0.00012	-0.00017	6e-05		1.6e-09	5.76e-08	1e-08	2.5e-09	4e-10	1.44e-08	2.89e-08	3.6e-09
9.8	-1e-05	1e-05	-5e-05	-0.00015	-7e-05	8e-05	-0.00012	-0.00014		9.8	0	0	0	0	0	0	0	0		-1e-05	1e-05	-5e-05	-0.00015	-7e-05	8e-05	-0.00012	-0.00014		1e-10	1e-10	2.5e-09	2.25e-08	4.9e-09	6.4e-09	1.44e-08	1.96e-08
10	-0.00011	0.00041	0	0.0001	3e-05	-7e-05	-0.00017	-0.00019		10	0	0	0	0	0	0	0	0		-0.00011	0.00041	0	0.0001	3e-05	-7e-05	-0.00017	-0.00019		1.21e-08	1.681e-07	0	1e-08	9e-10	4.9e-09	2.89e-08	3.61e-08
10.2	-0.00011	-4e-05	-0.0001	-5e-05	-2e-05	0.00023	-0.00017	-0.00019		10.2	0	0	0	0	0	0	0	0		-0.00011	-4e-05	-0.0001	-5e-05	-2e-05	0.00023	-0.00017	-0.00019		1.21e-08	1.6e-09	1e-08	2.5e-09	4e-10	5.29e-08	2.89e-08	3.61e-08
10.4	-0.00016	-0.00024	5e-05	-5e-05	-2e-05	-0.00012	-0.00017	-0.00014		10.4	0	0	0	0	0	0	0	0		-0.00016	-0.00024	5e-05	-5e-05	-2e-05	-0.00012	-0.00017	-0.00014		2.56e-08	5.76e-08	2.5e-09	2.5e-09	4e-10	1.44e-08	2.89e-08	1.96e-08
10.6	4e-05	1e-05	-0.00015	-5e-05	-0.00012	-0.00012	-0.00012	-0.00019		10.6	0	0	0	0	0	0	0	0		4e-05	1e-05	-0.00015	-5e-05	-0.00012	-0.00012	-0.00012	-0.00019		1.6e-09	1e-10	2.25e-08	2.5e-09	1.44e-08	1.44e-08	1.44e-08	3.61e-08
10.8	-6e-05	0.00066	-5e-05	-0.0002	-0.00017	-0.00017	-0.00012	-0.00014		10.8	0	0	0	0	0	0	0	0		-6e-05	0.00066	-5e-05	-0.0002	-0.00017	-0.00017	-0.00012	-0.00014		3.6e-09	4.356e-07	2.5e-09	4e-08	2.89e-08	2.89e-08	1.44e-08	1.96e-08
11	-0.00016	0.01081	-0.00015	0.0001	0.00013	-0.00027	-7e-05	-0.00014		11	0	0	0	0	0	0	0	0		-0.00016	0.01081	-0.00015	0.0001	0.00013	-0.00027	-7e-05	-0.00014		2.56e-08	0.000116856	2.25e-08	1e-08	1.69e-08	7.29e-08	4.9e-09	1.96e-08
11.2	0.00204	0.01051	5e-05	0	8e-05	-0.00012	-7e-05	-9e-05		11.2	0	0	0	0	0	0	0	0		0.00204	0.01051	5e-05	0	8e-05	-0.00012	-7e-05	-9e-05		4.1616e-06	0.00011046	2.5e-09	0	6.4e-09	1.44e-08	4.9e-09	8.1e-09
11.4	0.00929	0.01211	0.00365	0	3e-05	-0.00032	-7e-05	-9e-05		11.4	0	0	0	0	0	0	0	0		0.00929	0.01211	0.00365	0	3e-05	-0.00032	-7e-05	-9e-05		8.63041e-05	0.000146652	1.33225e-05	0	9e-10	1.024e-07	4.9e-09	8.1e-09
11.6	0.01154	0.01786	0.01275	-0.0001	3e-05	-0.00017	-2e-05	-4e-05		11.6	0	0.03	0	0	0	0	0	0		0.01154	-0.01214	0.01275	-0.0001	3e-05	-0.00017	-2e-05	-4e-05		0.000133172	0.00014738	0.000162562	1e-08	9e-10	2.89e-08	4e-10	1.6e-09
11.8	0.01224	0.02656	0.01795	-0.0002	-0.00012	-0.00027	-2e-05	-4e-05		11.8	0.007	0.045	0	0	0	0	0	0		0.00524	-0.01844	0.01795	-0.0002	-0.00012	-0.00027	-2e-05	-4e-05		2.74576e-05	0.000340034	0.000322203	4e-08	1.44e-08	7.29e-08	4e-10	1.6e-09
12	0.01389	0.03236	0.0167	0.0028	-0.00012	-0.00017	-0.00017	-4e-05		12	0.0381	0.0633	0	0	0	0	0	0		-0.02421	-0.03094	0.0167	0.0028	-0.00012	-0.00017	-0.00017	-4e-05		0.000586124	0.000957284	0.00027889	7.84e-06	1.44e-08	2.89e-08	2.89e-08	1.6e-09
12.2	0.01684	0.03216	0.01835	0.00595	-7e-05	-0.00022	-2e-05	-0.00019		12.2	0.0506	0.0698	0.0405	0	0	0	0	0		-0.03376	-0.03764	-0.02215	0.00595	-7e-05	-0.00022	-2e-05	-0.00019		0.00113974	0.00141677	0.000490622	3.54025e-05	4.9e-09	4.84e-08	4e-10	3.61e-08
12.4	0.01794	0.03646	0.0221	0.00635	0.00508	0.00563	-7e-05	1e-05		12.4	0.0566	0.0677	0.0522	0	0	0	0	0		-0.03866	-0.03124	-0.0301	0.00635	0.00508	0.00563	-7e-05	1e-05		0.0014946	0.000975938	0.00090601	4.03225e-05	2.58064e-05	3.16969e-05	4.9e-09	1e-10
12.6	0.01994	0.03596	0.0244	0.0134	0.00718	0.01163	-7e-05	1e-05		12.6	0.0604	0.0672	0.0633	0	0	0	0	0		-0.04046	-0.03124	-0.0389	0.0134	0.00718	0.01163	-7e-05	1e-05		0.00163701	0.000975938	0.00151321	0.00017956	5.15524e-05	0.000135257	4.9e-09	1e-10
12.8	0.02579	0.04336	0.0287	0.01565	0.00888	0.01123	-7e-05	-4e-05		12.8	0.0615	0.0665	0.0558	0.0247	0	0	0	0		-0.03571	-0.02314	-0.0271	-0.00905	0.00888	0.01123	-7e-05	-4e-05		0.0012752	0.00053546	0.00073441	8.19025e-05	7.88544e-05	0.000126113	4.9e-09	1.6e-09
13	0.03714	0.05026	0.03785	0.01655	0.00933	0.02568	0.00263	-4e-05		13	0.0601	0.0652	0.056	0.024	0	0.0213	0	0		-0.02296	-0.01494	-0.01815	-0.00745	0.00933	0.00438	0.00263	-4e-05		0.000527162	0.000223204	0.000329422	5.55025e-05	8.70489e-05	1.91844e-05	6.9169e-06	1.6e-09
13.2	0.04459	0.05761	0.0466	0.01715	0.00873	0.03688	0.00498	-4e-05		13.2	0.0579	0.0668	0.0618	0.0384	0.0164	0.0359	0	0		-0.01331	-0.00919	-0.0152	-0.02125	-0.00767	0.00098	0.00498	-4e-05		0.000177156	8.44561e-05	0.00023104	0.000451562	5.88289e-05	9.604e-07	2.48004e-05	1.6e-09
13.4	0.04989	0.06971	0.0498	0.02405	0.01243	0.03593	0.00293	-4e-05		13.4	0.0567	0.0689	0.0623	0.0334	0.0205	0.0359	0.0109	0		-0.00681	0.00081	-0.0125	-0.00935	-0.00807	3e-05	-0.00797	-4e-05		4.63761e-05	6.561e-07	0.00015625	8.74225e-05	6.51249e-05	9e-10	6.35209e-05	1.6e-09
13.6	0.06959	0.07761	0.0514	0.02615	0.01448	0.03508	0.00383	0.00116		13.6	0.0564	0.0718	0.0615	0.0374	0.023	0.0353	0.0112	0		0.01319	0.00581	-0.0101	-0.01125	-0.00852	-0.00022	-0.00737	0.00116		0.000173976	3.37561e-05	0.00010201	0.000126563	7.25904e-05	4.84e-08	5.43169e-05	1.3456e-06
13.8	0.07604	0.09786	0.0611	0.0335	0.01423	0.03808	0.00793	0.00371		13.8	0.0556	0.0744	0.0625	0.0426	0.0239	0.0384	0.0126	0		0.02044	0.02346	-0.0014	-0.0091	-0.00967	-0.00032	-0.00467	0.00371		0.000417794	0.000550372	1.96e-06	8.281e-05	9.35089e-05	1.024e-07	2.18089e-05	1.37641e-05
14	0.07349	0.09986	0.0654	0.03585	0.01748	0.04083	0.01478	0.00296		14	0.0554	0.0766	0.0633	0.0449	0.0334	0.0377	0.0258	0		0.01809	0.02326	0.0021	-0.00905	-0.01592	0.00313	-0.01102	0.00296		0.000327248	0.000541028	4.41e-06	8.19025e-05	0.000253446	9.7969e-06	0.00012144	8.7616e-06
14.2	0.07234	0.09626	0.0739	0.0494	0.01353	0.03683	0.01713	0.00521		14.2	0.0588	0.0768	0.0636	0.0499	0.0346	0.038	0.031	0.0085		0.01354	0.01946	0.0103	-0.0005	-0.02107	-0.00117	-0.01387	-0.00329		0.000183332	0.000378692	0.00010609	2.5e-07	0.000443945	1.3689e-06	0.000192377	1.08241e-05
14.4	0.07174	0.07411	0.0755	0.05075	0.01613	0.03723	0.01978	0.01086		14.4	0.062	0.0792	0.0642	0.0504	0.0345	0.0426	0.0334	0.012		0.00974	-0.00509	0.0113	0.00035	-0.01837	-0.00537	-0.01362	-0.00114		9.48676e-05	2.59081e-05	0.00012769	1.225e-07	0.000337457	2.88369e-05	0.000185504	1.2996e-06
14.6	0.06834	0.06826	0.077	0.0545	0.02118	0.03538	0.02338	0.01176		14.6	0.0634	0.0774	0.0647	0.0502	0.0342	0.0448	0.0347	0.0199		0.00494	-0.00914	0.0123	0.0043	-0.01302	-0.00942	-0.01132	-0.00814		2.44036e-05	8.35396e-05	0.00015129	1.849e-05	0.00016952	8.87364e-05	0.000128142	6.62596e-05
14.8	0.06979	0.06686	0.071	0.05585	0.02933	0.04408	0.01983	0.00971		14.8	0.0638	0.0808	0.0665	0.0519	0.0353	0.0464	0.0388	0.0203		0.00599	-0.01394	0.0045	0.00395	-0.00597	-0.00232	-0.01897	-0.01059		3.58801e-05	0.000194324	2.025e-05	1.56025e-05	3.56409e-05	5.3824e-06	0.000359861	0.000112148
15	0.06729	0.05431	0.0706	0.05295	0.02458	0.04708	0.02123	0.00966		15	0.0642	0.0811	0.0688	0.0536	0.0362	0.0472	0.0385	0.0226		0.00309	-0.02679	0.0018	-0.00065	-0.01162	-0.00012	-0.01727	-0.01294		9.5481e-06	0.000717704	3.24e-06	4.225e-07	0.000135024	1.44e-08	0.000298253	0.000167444
15.2	0.05639	0.06126	0.0714	0.05065	0.02568	0.04873	0.02823	0.01201		15.2	0.0644	0.0823	0.0707	0.0542	0.0375	0.0476	0.0381	0.0243		-0.00801	-0.02104	0.0007	-0.00355	-0.01182	0.00113	-0.00987	-0.01229		6.41601e-05	0.000442682	4.9e-07	1.26025e-05	0.000139712	1.2769e-06	9.74169e-05	0.000151044
15.4	0.05179	0.05901	0.07695	0.0519	0.02878	0.04558	0.02578	0.01696		15.4	0.0644	0.0822	0.0713	0.0543	0.0393	0.0482	0.0381	0.025		-0.01261	-0.02319	0.00565	-0.0024	-0.01052	-0.00262	-0.01232	-0.00804		0.000159012	0.000537776	3.19225e-05	5.76e-06	0.00011067	6.8644e-06	0.000151782	6.46416e-05
15.6	0.04294	0.05846	0.07595	0.06815	0.03343	0.04438	0.02938	0.01666		15.6	0.064	0.0823	0.0723	0.0544	0.0403	0.0485	0.0391	0.0239		-0.02106	-0.02384	0.00365	0.01375	-0.00687	-0.00412	-0.00972	-0.00724		0.000443524	0.000568346	1.33225e-05	0.000189063	4.71969e-05	1.69744e-05	9.44784e-05	5.24176e-05
15.8	0.05719	0.06526	0.0763	0.06585	0.03823	0.04713	0.02868	0.01861		15.8	0.0646	0.0815	0.0731	0.0545	0.041	0.0493	0.0404	0.0245		-0.00741	-0.01624	0.0032	0.01135	-0.00277	-0.00217	-0.01172	-0.00589		5.49081e-05	0.000263738	1.024e-05	0.000128823	7.6729e-06	4.7089e-06	0.000137358	3.46921e-05
16	0.05904	0.06071	0.0817	0.0582	0.03218	0.05343	0.03658	0.01636		16	0.0654	0.0811	0.0725	0.0561	0.0412	0.0508	0.0414	0.0238		-0.00636	-0.02039	0.0092	0.0021	-0.00902	0.00263	-0.00482	-0.00744		4.04496e-05	0.000415752	8.464e-05	4.41e-06	8.13604e-05	6.9169e-06	2.32324e-05	5.53536e-05
16.2	0.06914	0.06146	0.0814	0.06375	0.02833	0.05068	0.03503	0.02056		16.2	0.0663	0.0807	0.0727	0.0575	0.042	0.0513	0.042	0.0243		0.00284	-0.01924	0.0087	0.00625	-0.01367	-0.00062	-0.00697	-0.00374		8.0656e-06	0.000370178	7.569e-05	3.90625e-05	0.000186869	3.844e-07	4.85809e-05	1.39876e-05
16.4	0.06989	0.07661	0.0782	0.05895	0.03993	0.05153	0.03643	0.01381		16.4	0.0672	0.081	0.0728	0.058	0.0426	0.0518	0.0422	0.0244		0.00269	-0.00439	0.0054	0.00095	-0.00267	-0.00027	-0.00577	-0.01059		7.2361e-06	1.92721e-05	2.916e-05	9.025e-07	7.1289e-06	7.29e-08	3.32929e-05	0.000112148
16.6	0.07379	0.06681	0.082	0.0592	0.04083	0.05138	0.03693	0.01701		16.6	0.0675	0.0828	0.073	0.0588	0.0432	0.0525	0.0425	0.0246		0.00629	-0.01599	0.009	0.0004	-0.00237	-0.00112	-0.00557	-0.00759		3.95641e-05	0.00025568	8.1e-05	1.6e-07	5.6169e-06	1.2544e-06	3.10249e-05	5.76081e-05
16.8	0.07604	0.08126	0.07955	0.06915	0.04373	0.05268	0.03763	0.02261		16.8	0.0688	0.0831	0.0743	0.0589	0.0438	0.0526	0.0433	0.0246		0.00724	-0.00184	0.00525	0.01025	-7e-05	8e-05	-0.00567	-0.00199		5.24176e-05	3.3856e-06	2.75625e-05	0.000105063	4.9e-09	6.4e-09	3.21489e-05	3.9601e-06
17	0.07794	0.07866	0.0755	0.06865	0.04203	0.05548	0.04463	0.02211		17	0.0691	0.0833	0.0756	0.0593	0.044	0.0537	0.0434	0.0247		0.00884	-0.00464	-0.0001	0.00935	-0.00197	0.00178	0.00123	-0.00259		7.81456e-05	2.15296e-05	1e-08	8.74225e-05	3.8809e-06	3.1684e-06	1.5129e-06	6.7081e-06
17.2	0.07469	0.07716	0.08105	0.06565	0.03713	0.05258	0.04333	0.01911		17.2	0.0696	0.083	0.0759	0.0603	0.0445	0.0545	0.0443	0.0252		0.00509	-0.00584	0.00515	0.00535	-0.00737	-0.00192	-0.00097	-0.00609		2.59081e-05	3.41056e-05	2.65225e-05	2.86225e-05	5.43169e-05	3.6864e-06	9.409e-07	3.70881e-05
17.4	0.07719	0.07941	0.082	0.06695	0.04623	0.05003	0.04313	0.01546		17.4	0.0698	0.0833	0.076	0.061	0.0452	0.0551	0.045	0.0256		0.00739	-0.00389	0.006	0.00595	0.00103	-0.00507	-0.00187	-0.01014		5.46121e-05	1.51321e-05	3.6e-05	3.54025e-05	1.0609e-06	2.57049e-05	3.4969e-06	0.00010282
17.6	0.07644	0.08206	0.08045	0.06735	0.04683	0.05058	0.04453	0.02236		17.6	0.07	0.0825	0.0761	0.0614	0.046	0.0552	0.0455	0.0259		0.00644	-0.00044	0.00435	0.00595	0.00083	-0.00462	-0.00097	-0.00354		4.14736e-05	1.936e-07	1.89225e-05	3.54025e-05	6.889e-07	2.13444e-05	9.409e-07	1.25316e-05
17.8	0.07539	0.08211	0.07425	0.06775	0.04773	0.05263	0.04663	0.02091		17.8	0.0698	0.0804	0.0758	0.0614	0.0464	0.055	0.0461	0.0262		0.00559	0.00171	-0.00155	0.00635	0.00133	-0.00237	0.00053	-0.00529		3.12481e-05	2.9241e-06	2.4025e-06	4.03225e-05	1.7689e-06	5.6169e-06	2.809e-07	2.79841e-05
18	0.07459	0.07896	0.0725	0.0722	0.04173	0.05813	0.04513	0.01526		18	0.0693	0.079	0.0755	0.061	0.0464	0.0549	0.0461	0.0264		0.00529	-4e-05	-0.003	0.0112	-0.00467	0.00323	-0.00097	-0.01114		2.79841e-05	1.6e-09	9e-06	0.00012544	2.18089e-05	1.04329e-05	9.409e-07	0.0001241
18.2	0.07589	0.07516	0.0737	0.06995	0.04483	0.06038	0.04253	0.01886		18.2	0.0691	0.0777	0.0747	0.0607	0.0462	0.0547	0.0463	0.0264		0.00679	-0.00254	-0.001	0.00925	-0.00137	0.00568	-0.00377	-0.00754		4.61041e-05	6.4516e-06	1e-06	8.55625e-05	1.8769e-06	3.22624e-05	1.42129e-05	5.68516e-05
18.4	0.07639	0.07616	0.07315	0.06665	0.04868	0.05143	0.04403	0.01781		18.4	0.0685	0.0769	0.0738	0.0603	0.0458	0.0547	0.0461	0.0263		0.00789	-0.00074	-0.00065	0.00635	0.00288	-0.00327	-0.00207	-0.00849		6.22521e-05	5.476e-07	4.225e-07	4.03225e-05	8.2944e-06	1.06929e-05	4.2849e-06	7.20801e-05
18.6	0.07719	0.07821	0.0766	0.0661	0.04678	0.05363	0.05088	0.01821		18.6	0.0677	0.0758	0.0732	0.0599	0.0455	0.0541	0.046	0.0264		0.00949	0.00241	0.0034	0.0062	0.00128	-0.00047	0.00488	-0.00819		9.00601e-05	5.8081e-06	1.156e-05	3.844e-05	1.6384e-06	2.209e-07	2.38144e-05	6.70761e-05
18.8	0.07559	0.07751	0.07355	0.0696	0.04058	0.05628	0.04728	0.02026		18.8	0.0667	0.0748	0.0724	0.0594	0.0453	0.054	0.0457	0.0265		0.00889	0.00271	0.00115	0.0102	-0.00472	0.00228	0.00158	-0.00624		7.90321e-05	7.3441e-06	1.3225e-06	0.00010404	2.22784e-05	5.1984e-06	2.4964e-06	3.89376e-05
19	0.07604	0.07886	0.075	0.066	0.04123	0.05663	0.04368	0.01861		19	0.0658	0.0734	0.0719	0.059	0.0452	0.0537	0.0454	0.0266		0.01024	0.00546	0.0031	0.007	-0.00397	0.00293	-0.00172	-0.00799		0.000104858	2.98116e-05	9.61e-06	4.9e-05	1.57609e-05	8.5849e-06	2.9584e-06	6.38401e-05
19.2	0.07449	0.07701	0.07315	0.0656	0.04068	0.05543	0.04853	0.01326		19.2	0.0652	0.0723	0.0713	0.0586	0.0449	0.0532	0.0452	0.0265		0.00929	0.00471	0.00185	0.007	-0.00422	0.00223	0.00333	-0.01324		8.63041e-05	2.21841e-05	3.4225e-06	4.9e-05	1.78084e-05	4.9729e-06	1.10889e-05	0.000175298
19.4	0.07524	0.08196	0.06975	0.06485	0.04548	0.04843	0.04173	0.01371		19.4	0.0644	0.071	0.0704	0.058	0.0444	0.0529	0.0451	0.0265		0.01084	0.01096	-0.00065	0.00685	0.00108	-0.00447	-0.00337	-0.01279		0.000117506	0.000120122	4.225e-07	4.69225e-05	1.1664e-06	1.99809e-05	1.13569e-05	0.000163584
19.6	0.07454	0.08271	0.0712	0.07045	0.04978	0.04818	0.04498	0.01971		19.6	0.0639	0.0695	0.0696	0.0573	0.0438	0.0524	0.0449	0.0264		0.01064	0.01321	0.0016	0.01315	0.00598	-0.00422	8e-05	-0.00669		0.00011321	0.000174504	2.56e-06	0.000172923	3.57604e-05	1.78084e-05	6.4e-09	4.47561e-05
19.8	0.07154	0.07421	0.07345	0.0698	0.04628	0.05408	0.04433	0.02181		19.8	0.0634	0.0689	0.0688	0.0566	0.0433	0.0519	0.0447	0.0263		0.00814	0.00531	0.00465	0.0132	0.00298	0.00218	-0.00037	-0.00449		6.62596e-05	2.81961e-05	2.16225e-05	0.00017424	8.8804e-06	4.7524e-06	1.369e-07	2.01601e-05
20	0.07534	0.07441	0.0734	0.0655	0.04163	0.05608	0.04308	0.01561		20	0.0634	0.0686	0.0681	0.0559	0.0428	0.0515	0.0442	0.0261		0.01194	0.00581	0.0053	0.0096	-0.00117	0.00458	-0.00112	-0.01049		0.000142564	3.37561e-05	2.809e-05	9.216e-05	1.3689e-06	2.09764e-05	1.2544e-06	0.00011004
20.2	0.07239	0.07361	0.0747	0.0646	0.04013	0.05683	0.04483	0.01146		20.2	0.0634	0.068	0.0679	0.055	0.0421	0.0508	0.0438	0.026		0.00899	0.00561	0.0068	0.0096	-0.00197	0.00603	0.00103	-0.01454		8.08201e-05	3.14721e-05	4.624e-05	9.216e-05	3.8809e-06	3.63609e-05	1.0609e-06	0.000211412
20.4	0.07379	0.06721	0.0711	0.05895	0.04153	0.05318	0.04933	0.01681		20.4	0.0631	0.0669	0.0677	0.0543	0.0415	0.0502	0.0433	0.0257		0.01069	0.00031	0.0034	0.00465	3e-05	0.00298	0.00603	-0.00889		0.000114276	9.61e-08	1.156e-05	2.16225e-05	9e-10	8.8804e-06	3.63609e-05	7.90321e-05
20.6	0.07119	0.07326	0.06915	0.0593	0.04378	0.05418	0.05028	0.02081		20.6	0.0626	0.0656	0.0673	0.0539	0.041	0.05	0.0427	0.0254		0.00859	0.00766	0.00185	0.0054	0.00278	0.00418	0.00758	-0.00459		7.37881e-05	5.86756e-05	3.4225e-06	2.916e-05	7.7284e-06	1.74724e-05	5.74564e-05	2.10681e-05
20.8	0.06954	0.06861	0.067	0.06415	0.04213	0.04708	0.04323	0.02661		20.8	0.0617	0.0647	0.0665	0.0537	0.0408	0.0499	0.0424	0.0253		0.00784	0.00391	0.0005	0.01045	0.00133	-0.00282	0.00083	0.00131		6.14656e-05	1.52881e-05	2.5e-07	0.000109203	1.7689e-06	7.9524e-06	6.889e-07	1.7161e-06
21	0.07104	0.06891	0.0694	0.0638	0.03858	0.04653	0.04183	0.01881		21	0.0609	0.0638	0.0658	0.0534	0.0405	0.0495	0.0421	0.0251		0.01014	0.00511	0.0036	0.0104	-0.00192	-0.00297	-0.00027	-0.00629		0.00010282	2.61121e-05	1.296e-05	0.00010816	3.6864e-06	8.8209e-06	7.29e-08	3.95641e-05
21.2	0.06999	0.07491	0.0691	0.0642	0.03958	0.05513	0.03598	0.01566		21.2	0.06	0.0628	0.0651	0.0528	0.0402	0.0487	0.0418	0.0251		0.00999	0.01211	0.004	0.0114	-0.00062	0.00643	-0.00582	-0.00944		9.98001e-05	0.000146652	1.6e-05	0.00012996	3.844e-07	4.13449e-05	3.38724e-05	8.91136e-05
21.4	0.07214	0.07586	0.07055	0.06075	0.03943	0.05383	0.04308	0.01196		21.4	0.0595	0.0617	0.0645	0.0521	0.0397	0.0481	0.0415	0.0249		0.01264	0.01416	0.00605	0.00865	-0.00027	0.00573	0.00158	-0.01294		0.00015977	0.000200506	3.66025e-05	7.48225e-05	7.29e-08	3.28329e-05	2.4964e-06	0.000167444
21.6	0.06904	0.07771	0.06605	0.06015	0.04333	0.05838	0.04688	0.02446		21.6	0.0595	0.0609	0.0637	0.0516	0.0393	0.0479	0.041	0.0248		0.00954	0.01681	0.00235	0.00855	0.00403	0.01048	0.00588	-0.00034		9.10116e-05	0.000282576	5.5225e-06	7.31025e-05	1.62409e-05	0.00010983	3.45744e-05	1.156e-07
21.8	0.07029	0.07616	0.06255	0.0651	0.04113	0.06003	0.03923	0.02151		21.8	0.0592	0.0607	0.0629	0.0514	0.0391	0.0477	0.0408	0.0246		0.01109	0.01546	-0.00035	0.0137	0.00203	0.01233	-0.00157	-0.00309		0.000122988	0.000239012	1.225e-07	0.00018769	4.1209e-06	0.000152029	2.4649e-06	9.5481e-06
22	0.07089	0.07106	0.06435	0.0636	0.04313	0.05838	0.04068	0.01936		22	0.0588	0.0615	0.0626	0.0512	0.0389	0.0473	0.0406	0.0244		0.01209	0.00956	0.00175	0.0124	0.00423	0.01108	8e-05	-0.00504		0.000146168	9.13936e-05	3.0625e-06	0.00015376	1.78929e-05	0.000122766	6.4e-09	2.54016e-05
22.2	0.06834	0.07046	0.066	0.0598	0.04088	0.05353	0.04358	0.01711		22.2	0.0589	0.0622	0.0631	0.0508	0.0386	0.0471	0.0405	0.0244		0.00944	0.00826	0.0029	0.009	0.00228	0.00643	0.00308	-0.00729		8.91136e-05	6.82276e-05	8.41e-06	8.1e-05	5.1984e-06	4.13449e-05	9.4864e-06	5.31441e-05
22.4	0.06949	0.06626	0.0657	0.05925	0.04278	0.05308	0.04333	0.01441		22.4	0.0588	0.0619	0.0634	0.0505	0.0383	0.0469	0.0403	0.0243		0.01069	0.00436	0.0023	0.00875	0.00448	0.00618	0.00303	-0.00989		0.000114276	1.90096e-05	5.29e-06	7.65625e-05	2.00704e-05	3.81924e-05	9.1809e-06	9.78121e-05
22.6	0.07089	0.06746	0.06935	0.05665	0.03878	0.05078	0.04423	0.02361		22.6	0.0585	0.0615	0.0631	0.0504	0.0382	0.047	0.0401	0.0241		0.01239	0.00596	0.00625	0.00625	0.00058	0.00378	0.00413	-0.00049		0.000153512	3.55216e-05	3.90625e-05	3.90625e-05	3.364e-07	1.42884e-05	1.70569e-05	2.401e-07
22.8	0.06644	0.07401	0.0648	0.0571	0.04023	0.05058	0.04053	0.01746		22.8	0.0582	0.0615	0.0627	0.0504	0.0381	0.0471	0.0399	0.0239		0.00824	0.01251	0.0021	0.0067	0.00213	0.00348	0.00063	-0.00644		6.78976e-05	0.0001565	4.41e-06	4.489e-05	4.5369e-06	1.21104e-05	3.969e-07	4.14736e-05
23	0.06524	0.07656	0.0654	0.05625	0.03798	0.05318	0.04303	0.01061		23	0.058	0.0616	0.0626	0.0503	0.038	0.0471	0.0399	0.0237		0.00724	0.01496	0.0028	0.00595	-2e-05	0.00608	0.00313	-0.01309		5.24176e-05	0.000223802	7.84e-06	3.54025e-05	4e-10	3.69664e-05	9.7969e-06	0.000171348
23.2	0.06684	0.06801	0.0666	0.05545	0.03818	0.05503	0.04333	0.01031		23.2	0.0581	0.0616	0.0625	0.0501	0.0378	0.0468	0.0398	0.0236		0.00874	0.00641	0.0041	0.00535	0.00038	0.00823	0.00353	-0.01329		7.63876e-05	4.10881e-05	1.681e-05	2.86225e-05	1.444e-07	6.77329e-05	1.24609e-05	0.000176624
23.4	0.06749	0.06561	0.0653	0.05875	0.03633	0.05293	0.04268	0.02256		23.4	0.0587	0.0626	0.0622	0.05	0.0377	0.0465	0.0397	0.0236		0.00879	0.00301	0.0031	0.00875	-0.00137	0.00643	0.00298	-0.00104		7.72641e-05	9.0601e-06	9.61e-06	7.65625e-05	1.8769e-06	4.13449e-05	8.8804e-06	1.0816e-06
23.6	0.06504	0.07021	0.06115	0.0582	0.03853	0.05563	0.04208	0.02041		23.6	0.0597	0.0639	0.0623	0.05	0.0378	0.0465	0.0396	0.0235		0.00534	0.00631	-0.00115	0.0082	0.00073	0.00913	0.00248	-0.00309		2.85156e-05	3.98161e-05	1.3225e-06	6.724e-05	5.329e-07	8.33569e-05	6.1504e-06	9.5481e-06
23.8	0.06874	0.07411	0.06305	0.0586	0.04158	0.05278	0.04243	0.01661		23.8	0.0604	0.0645	0.0632	0.0503	0.0379	0.0466	0.0395	0.0234		0.00834	0.00961	-0.00015	0.0083	0.00368	0.00618	0.00293	-0.00679		6.95556e-05	9.23521e-05	2.25e-08	6.889e-05	1.35424e-05	3.81924e-05	8.5849e-06	4.61041e-05
24	0.06689	0.06471	0.06545	0.05555	0.04188	0.05123	0.03843	0.00986		24	0.0604	0.0645	0.0642	0.0507	0.038	0.0467	0.0395	0.0234		0.00649	0.00021	0.00125	0.00485	0.00388	0.00453	-0.00107	-0.01354		4.21201e-05	4.41e-08	1.5625e-06	2.35225e-05	1.50544e-05	2.05209e-05	1.1449e-06	0.000183332
24.2	0.06409	0.06531	0.06645	0.0547	0.03703	0.04948	0.04063	0.01856		24.2	0.0599	0.064	0.0647	0.0511	0.0381	0.0472	0.0396	0.0235		0.00419	0.00131	0.00175	0.0036	-0.00107	0.00228	0.00103	-0.00494		1.75561e-05	1.7161e-06	3.0625e-06	1.296e-05	1.1449e-06	5.1984e-06	1.0609e-06	2.44036e-05
24.4	0.06729	0.06831	0.06305	0.06185	0.03923	0.04773	0.04248	0.02091		24.4	0.0589	0.0633	0.0643	0.0515	0.0383	0.0478	0.0398	0.0235		0.00839	0.00501	-0.00125	0.01035	0.00093	-7e-05	0.00268	-0.00259		7.03921e-05	2.51001e-05	1.5625e-06	0.000107123	8.649e-07	4.9e-09	7.1824e-06	6.7081e-06
24.6	0.06259	0.06556	0.06345	0.05655	0.03968	0.04873	0.04198	0.01986		24.6	0.058	0.0642	0.0634	0.0515	0.0384	0.048	0.04	0.0235		0.00459	0.00136	5e-05	0.00505	0.00128	0.00073	0.00198	-0.00364		2.10681e-05	1.8496e-06	2.5e-09	2.55025e-05	1.6384e-06	5.329e-07	3.9204e-06	1.32496e-05
24.8	0.06304	0.06886	0.064	0.0549	0.04048	0.05008	0.03963	0.01441		24.8	0.0585	0.0661	0.0629	0.0512	0.0382	0.0476	0.0401	0.0236		0.00454	0.00276	0.0011	0.0037	0.00228	0.00248	-0.00047	-0.00919		2.06116e-05	7.6176e-06	1.21e-06	1.369e-05	5.1984e-06	6.1504e-06	2.209e-07	8.44561e-05
25	0.06314	0.06851	0.06165	0.05555	0.04273	0.04753	0.03973	0.01156		25	0.0602	0.0671	0.0635	0.0508	0.0379	0.0471	0.04	0.0237		0.00294	0.00141	-0.00185	0.00475	0.00483	0.00043	-0.00027	-0.01214		8.6436e-06	1.9881e-06	3.4225e-06	2.25625e-05	2.33289e-05	1.849e-07	7.29e-08	0.00014738
25.2	0.06334	0.06691	0.06295	0.0543	0.04158	0.04593	0.04303	0.01546		25.2	0.0614	0.067	0.0645	0.0506	0.0378	0.0468	0.0398	0.0237		0.00194	-9e-05	-0.00155	0.0037	0.00378	-0.00087	0.00323	-0.00824		3.7636e-06	8.1e-09	2.4025e-06	1.369e-05	1.42884e-05	7.569e-07	1.04329e-05	6.78976e-05
25.4	0.06584	0.06811	0.0639	0.0556	0.03848	0.04703	0.03958	0.01661		25.4	0.0618	0.067	0.065	0.0513	0.0382	0.0473	0.0396	0.0237		0.00404	0.00111	-0.0011	0.0043	0.00028	-0.00027	-2e-05	-0.00709		1.63216e-05	1.2321e-06	1.21e-06	1.849e-05	7.84e-08	7.29e-08	4e-10	5.02681e-05
25.6	0.06379	0.06956	0.06485	0.0544	0.03748	0.04748	0.03928	0.01271		25.6	0.0614	0.0671	0.0654	0.0525	0.039	0.0483	0.0398	0.0238		0.00239	0.00246	-0.00055	0.0019	-0.00152	-0.00082	-0.00052	-0.01109		5.7121e-06	6.0516e-06	3.025e-07	3.61e-06	2.3104e-06	6.724e-07	2.704e-07	0.000122988
25.8	0.06579	0.07061	0.06335	0.0578	0.03753	0.05143	0.04078	0.00901		25.8	0.0605	0.0672	0.0659	0.0533	0.0396	0.0489	0.0404	0.0239		0.00529	0.00341	-0.00255	0.0045	-0.00207	0.00253	0.00038	-0.01489		2.79841e-05	1.16281e-05	6.5025e-06	2.025e-05	4.2849e-06	6.4009e-06	1.444e-07	0.000221712
26	0.06299	0.07181	0.05995	0.05645	0.03908	0.04698	0.03908	0.01261		26	0.0595	0.0671	0.0657	0.0534	0.0395	0.0491	0.0409	0.024		0.00349	0.00471	-0.00575	0.00305	-0.00042	-0.00212	-0.00182	-0.01139		1.21801e-05	2.21841e-05	3.30625e-05	9.3025e-06	1.764e-07	4.4944e-06	3.3124e-06	0.000129732
26.2	0.06134	0.06631	0.0583	0.0556	0.04018	0.05188	0.04173	0.02541		26.2	0.0588	0.0665	0.0649	0.0531	0.0392	0.0492	0.0413	0.0243		0.00254	-0.00019	-0.0066	0.0025	0.00098	0.00268	0.00043	0.00111		6.4516e-06	3.61e-08	4.356e-05	6.25e-06	9.604e-07	7.1824e-06	1.849e-07	1.2321e-06
26.4	0.06489	0.06786	0.0603	0.0546	0.03793	0.05023	0.04013	0.02116		26.4	0.0587	0.0654	0.064	0.0526	0.0389	0.049	0.0413	0.0243		0.00619	0.00246	-0.0037	0.002	-0.00097	0.00123	-0.00117	-0.00314		3.83161e-05	6.0516e-06	1.369e-05	4e-06	9.409e-07	1.5129e-06	1.3689e-06	9.8596e-06
26.6	0.06294	0.06696	0.06205	0.0532	0.03788	0.04638	0.04148	0.01801		26.6	0.0588	0.0642	0.063	0.0521	0.039	0.0486	0.0409	0.0242		0.00414	0.00276	-0.00095	0.0011	-0.00112	-0.00222	0.00058	-0.00619		1.71396e-05	7.6176e-06	9.025e-07	1.21e-06	1.2544e-06	4.9284e-06	3.364e-07	3.83161e-05
26.8	0.06299	0.06601	0.064	0.055	0.03958	0.04783	0.03673	0.01386		26.8	0.0585	0.063	0.062	0.0518	0.0393	0.0481	0.0406	0.0242		0.00449	0.00301	0.002	0.0032	0.00028	-0.00027	-0.00387	-0.01034		2.01601e-05	9.0601e-06	4e-06	1.024e-05	7.84e-08	7.29e-08	1.49769e-05	0.000106916
27	0.06019	0.06451	0.0634	0.05575	0.03518	0.05033	0.03768	0.01056		27	0.0581	0.062	0.0613	0.0517	0.0393	0.0478	0.0406	0.0242		0.00209	0.00251	0.0021	0.00405	-0.00412	0.00253	-0.00292	-0.01364		4.3681e-06	6.3001e-06	4.41e-06	1.64025e-05	1.69744e-05	6.4009e-06	8.5264e-06	0.00018605
27.2	0.06329	0.06651	0.06065	0.0565	0.03548	0.04803	0.03853	0.01131		27.2	0.0577	0.0615	0.0608	0.0515	0.0392	0.0477	0.0406	0.0241		0.00559	0.00501	-0.00015	0.005	-0.00372	0.00033	-0.00207	-0.01279		3.12481e-05	2.51001e-05	2.25e-08	2.5e-05	1.38384e-05	1.089e-07	4.2849e-06	0.000163584
27.4	0.06294	0.07146	0.059	0.05265	0.04243	0.04448	0.04033	0.02361		27.4	0.0568	0.062	0.0605	0.0512	0.0389	0.0476	0.0407	0.0242		0.00614	0.00946	-0.0015	0.00145	0.00353	-0.00312	-0.00037	-0.00059		3.76996e-05	8.94916e-05	2.25e-06	2.1025e-06	1.24609e-05	9.7344e-06	1.369e-07	3.481e-07
27.6	0.06299	0.06906	0.057	0.0579	0.04318	0.04998	0.04143	0.02091		27.6	0.0555	0.0622	0.0605	0.051	0.0387	0.0475	0.0406	0.0242		0.00749	0.00686	-0.0035	0.0069	0.00448	0.00248	0.00083	-0.00329		5.61001e-05	4.70596e-05	1.225e-05	4.761e-05	2.00704e-05	6.1504e-06	6.889e-07	1.08241e-05
27.8	0.06239	0.06886	0.0605	0.05525	0.03993	0.04673	0.04283	0.01656		27.8	0.0542	0.0613	0.0602	0.0508	0.0384	0.0475	0.0404	0.0241		0.00819	0.00756	0.0003	0.00445	0.00153	-0.00077	0.00243	-0.00754		6.70761e-05	5.71536e-05	9e-08	1.98025e-05	2.3409e-06	5.929e-07	5.9049e-06	5.68516e-05
28	0.06404	0.06856	0.06275	0.0527	0.03428	0.04978	0.03853	0.01276		28	0.053	0.0602	0.0594	0.0504	0.0381	0.0474	0.0402	0.0241		0.01104	0.00836	0.00335	0.0023	-0.00382	0.00238	-0.00167	-0.01134		0.000121882	6.98896e-05	1.12225e-05	5.29e-06	1.45924e-05	5.6644e-06	2.7889e-06	0.000128596
28.2	0.06169	0.06641	0.06405	0.05005	0.03418	0.05063	0.03998	0.00746		28.2	0.0522	0.0592	0.0583	0.0497	0.0377	0.047	0.04	0.024		0.00949	0.00721	0.00575	0.00035	-0.00352	0.00363	-2e-05	-0.01654		9.00601e-05	5.19841e-05	3.30625e-05	1.225e-07	1.23904e-05	1.31769e-05	4e-10	0.000273572
28.4	0.06004	0.06286	0.06325	0.0526	0.03418	0.04833	0.03833	0.00946		28.4	0.0515	0.0582	0.0572	0.0488	0.0371	0.0465	0.0398	0.0238		0.00854	0.00466	0.00605	0.0038	-0.00292	0.00183	-0.00147	-0.01434		7.29316e-05	2.17156e-05	3.66025e-05	1.444e-05	8.5264e-06	3.3489e-06	2.1609e-06	0.000205636
28.6	0.05939	0.06936	0.0601	0.05085	0.03418	0.04778	0.03708	0.01516		28.6	0.051	0.0576	0.0562	0.0479	0.0364	0.0457	0.0394	0.0236		0.00839	0.01176	0.0039	0.00295	-0.00222	0.00208	-0.00232	-0.00844		7.03921e-05	0.000138298	1.521e-05	8.7025e-06	4.9284e-06	4.3264e-06	5.3824e-06	7.12336e-05
28.8	0.06219	0.06751	0.05775	0.0501	0.03938	0.04938	0.03743	0.01401		28.8	0.0505	0.0576	0.0553	0.0471	0.0359	0.0448	0.0388	0.0234		0.01169	0.00991	0.00245	0.003	0.00348	0.00458	-0.00137	-0.00939		0.000136656	9.82081e-05	6.0025e-06	9e-06	1.21104e-05	2.09764e-05	1.8769e-06	8.81721e-05
29	0.06069	0.06206	0.05935	0.05175	0.03888	0.04838	0.03898	0.01561		29	0.0501	0.0576	0.0548	0.0464	0.0355	0.0442	0.0381	0.0231		0.01059	0.00446	0.00455	0.00535	0.00338	0.00418	0.00088	-0.00749		0.000112148	1.98916e-05	2.07025e-05	2.86225e-05	1.14244e-05	1.74724e-05	7.744e-07	5.61001e-05
29.2	0.06314	0.06301	0.0613	0.05005	0.03508	0.04573	0.03853	0.01301		29.2	0.0499	0.0572	0.0546	0.0457	0.0351	0.0439	0.0376	0.0227		0.01324	0.00581	0.0067	0.00435	-2e-05	0.00183	0.00093	-0.00969		0.000175298	3.37561e-05	4.489e-05	1.89225e-05	4e-10	3.3489e-06	8.649e-07	9.38961e-05
29.4	0.06064	0.06686	0.0637	0.0537	0.03593	0.04753	0.03733	0.02181		29.4	0.05	0.0569	0.0545	0.0453	0.0347	0.0438	0.0371	0.0224		0.01064	0.00996	0.0092	0.0084	0.00123	0.00373	0.00023	-0.00059		0.00011321	9.92016e-05	8.464e-05	7.056e-05	1.5129e-06	1.39129e-05	5.29e-08	3.481e-07
29.6	0.06234	0.06481	0.06135	0.0565	0.03823	0.04803	0.03838	0.02346		29.6	0.0503	0.0567	0.0542	0.0452	0.0343	0.0435	0.0368	0.0221		0.01204	0.00811	0.00715	0.0113	0.00393	0.00453	0.00158	0.00136		0.000144962	6.57721e-05	5.11225e-05	0.00012769	1.54449e-05	2.05209e-05	2.4964e-06	1.8496e-06
29.8	0.06029	0.06621	0.0586	0.0554	0.03523	0.04328	0.03968	0.01241		29.8	0.0503	0.0566	0.0539	0.0453	0.0342	0.0433	0.0365	0.0219		0.00999	0.00961	0.0047	0.0101	0.00103	-2e-05	0.00318	-0.00949		9.98001e-05	9.23521e-05	2.209e-05	0.00010201	1.0609e-06	4e-10	1.01124e-05	9.00601e-05
30	0.06069	0.07081	0.059	0.0541	0.03268	0.04773	0.03883	0.01116		30	0.0502	0.0565	0.0539	0.0451	0.0342	0.0429	0.0362	0.0218		0.01049	0.01431	0.0051	0.009	-0.00152	0.00483	0.00263	-0.01064		0.00011004	0.000204776	2.601e-05	8.1e-05	2.3104e-06	2.33289e-05	6.9169e-06	0.00011321
30.2	0.05919	0.06966	0.0587	0.0551	0.03278	0.04713	0.03603	0.00761		30.2	0.05	0.0565	0.054	0.045	0.0341	0.0427	0.036	0.0217		0.00919	0.01316	0.0047	0.0101	-0.00132	0.00443	3e-05	-0.01409		8.44561e-05	0.000173186	2.209e-05	0.00010201	1.7424e-06	1.96249e-05	9e-10	0.000198528
30.4	0.06124	0.06806	0.0604	0.0514	0.03163	0.04573	0.04023	0.00826		30.4	0.0498	0.0564	0.0541	0.0448	0.034	0.0424	0.0359	0.0216		0.01144	0.01166	0.0063	0.0066	-0.00237	0.00333	0.00433	-0.01334		0.000130874	0.000135956	3.969e-05	4.356e-05	5.6169e-06	1.10889e-05	1.87489e-05	0.000177956
30.6	0.06099	0.07406	0.06385	0.0449	0.03563	0.04663	0.03308	0.02626		30.6	0.0495	0.0559	0.054	0.0446	0.0338	0.0421	0.0357	0.0214		0.01149	0.01816	0.00985	0.0003	0.00183	0.00453	-0.00262	0.00486		0.00013202	0.000329786	9.70225e-05	9e-08	3.3489e-06	2.05209e-05	6.8644e-06	2.36196e-05
30.8	0.05879	0.07251	0.06285	0.0483	0.03313	0.04658	0.03628	0.02426		30.8	0.0493	0.0555	0.0538	0.0444	0.0335	0.042	0.0356	0.0213		0.00949	0.01701	0.00905	0.0039	-0.00037	0.00458	0.00068	0.00296		9.00601e-05	0.00028934	8.19025e-05	1.521e-05	1.369e-07	2.09764e-05	4.624e-07	8.7616e-06
31	0.05894	0.06786	0.06245	0.0494	0.03633	0.04418	0.03548	0.01776		31	0.0491	0.0555	0.0535	0.0442	0.0332	0.042	0.0354	0.0211		0.00984	0.01236	0.00895	0.0052	0.00313	0.00218	8e-05	-0.00334		9.68256e-05	0.00015277	8.01025e-05	2.704e-05	9.7969e-06	4.7524e-06	6.4e-09	1.11556e-05
31.2	0.06084	0.06436	0.061	0.0533	0.03703	0.04543	0.04013	0.01721		31.2	0.049	0.0558	0.0532	0.044	0.033	0.0418	0.0353	0.021		0.01184	0.00856	0.0078	0.0093	0.00403	0.00363	0.00483	-0.00379		0.000140186	7.32736e-05	6.084e-05	8.649e-05	1.62409e-05	1.31769e-05	2.33289e-05	1.43641e-05
31.4	0.05644	0.05711	0.05775	0.05125	0.03813	0.04293	0.03643	0.01606		31.4	0.0492	0.0557	0.0531	0.0438	0.0329	0.0416	0.0351	0.021		0.00724	0.00141	0.00465	0.00745	0.00523	0.00133	0.00133	-0.00494		5.24176e-05	1.9881e-06	2.16225e-05	5.55025e-05	2.73529e-05	1.7689e-06	1.7689e-06	2.44036e-05
31.6	0.06264	0.05946	0.0581	0.05115	0.03368	0.04613	0.03673	0.01496		31.6	0.0494	0.0552	0.0532	0.0436	0.0328	0.0414	0.0349	0.021		0.01324	0.00426	0.0049	0.00755	0.00088	0.00473	0.00183	-0.00604		0.000175298	1.81476e-05	2.401e-05	5.70025e-05	7.744e-07	2.23729e-05	3.3489e-06	3.64816e-05
31.8	0.06129	0.06341	0.0591	0.04875	0.03538	0.04543	0.03718	0.01491		31.8	0.0494	0.055	0.0532	0.0436	0.0327	0.0414	0.0347	0.021		0.01189	0.00841	0.0059	0.00515	0.00268	0.00403	0.00248	-0.00609		0.000141372	7.07281e-05	3.481e-05	2.65225e-05	7.1824e-06	1.62409e-05	6.1504e-06	3.70881e-05
32	0.05809	0.06101	0.06125	0.04785	0.03333	0.04638	0.03648	0.01416		32	0.049	0.0548	0.053	0.0437	0.0327	0.0414	0.0347	0.021		0.00909	0.00621	0.00825	0.00415	0.00063	0.00498	0.00178	-0.00684		8.26281e-05	3.85641e-05	6.80625e-05	1.72225e-05	3.969e-07	2.48004e-05	3.1684e-06	4.67856e-05
32.2	0.06084	0.06261	0.06205	0.04615	0.03778	0.04298	0.03503	0.00961		32.2	0.0485	0.0544	0.0529	0.0437	0.0327	0.0413	0.0347	0.0209		0.01234	0.00821	0.00915	0.00245	0.00508	0.00168	0.00033	-0.01129		0.000152276	6.74041e-05	8.37225e-05	6.0025e-06	2.58064e-05	2.8224e-06	1.089e-07	0.000127464
32.4	0.05939	0.06466	0.05905	0.0488	0.03513	0.04193	0.03713	0.01246		32.4	0.048	0.0541	0.0527	0.0436	0.0326	0.0412	0.0346	0.0209		0.01139	0.01056	0.00635	0.0052	0.00253	0.00073	0.00253	-0.00844		0.000129732	0.000111514	4.03225e-05	2.704e-05	6.4009e-06	5.329e-07	6.4009e-06	7.12336e-05
32.6	0.05629	0.05971	0.05825	0.04965	0.03783	0.03873	0.03878	0.01946		32.6	0.0475	0.0536	0.0524	0.0434	0.0325	0.0411	0.0346	0.0209		0.00879	0.00611	0.00585	0.00625	0.00533	-0.00237	0.00418	-0.00144		7.72641e-05	3.73321e-05	3.42225e-05	3.90625e-05	2.84089e-05	5.6169e-06	1.74724e-05	2.0736e-06
32.8	0.05954	0.05881	0.0581	0.05185	0.03383	0.03753	0.03728	0.01731		32.8	0.047	0.0532	0.052	0.0431	0.0323	0.0409	0.0346	0.0209		0.01254	0.00561	0.0061	0.00875	0.00153	-0.00337	0.00268	-0.00359		0.000157252	3.14721e-05	3.721e-05	7.65625e-05	2.3409e-06	1.13569e-05	7.1824e-06	1.28881e-05
33	0.05949	0.06081	0.05775	0.0469	0.03518	0.04623	0.03553	0.01386		33	0.0465	0.0528	0.0515	0.0428	0.032	0.0407	0.0345	0.0209		0.01299	0.00801	0.00625	0.0041	0.00318	0.00553	0.00103	-0.00704		0.00016874	6.41601e-05	3.90625e-05	1.681e-05	1.01124e-05	3.05809e-05	1.0609e-06	4.95616e-05
33.2	0.05784	0.06086	0.06155	0.0436	0.03723	0.04908	0.03418	0.01136		33.2	0.0461	0.0524	0.0511	0.0425	0.0318	0.0405	0.0343	0.0208		0.01174	0.00846	0.01045	0.0011	0.00543	0.00858	-0.00012	-0.00944		0.000137828	7.15716e-05	0.000109203	1.21e-06	2.94849e-05	7.36164e-05	1.44e-08	8.91136e-05
33.4	0.05749	0.05826	0.0614	0.04975	0.03063	0.04433	0.03273	0.01271		33.4	0.0458	0.052	0.0507	0.0421	0.0316	0.0402	0.0341	0.0207		0.01169	0.00626	0.0107	0.00765	-0.00097	0.00413	-0.00137	-0.00799		0.000136656	3.91876e-05	0.00011449	5.85225e-05	9.409e-07	1.70569e-05	1.8769e-06	6.38401e-05
33.6	0.05869	0.05941	0.0599	0.0507	0.03303	0.04558	0.03343	0.01451		33.6	0.0455	0.0517	0.0503	0.0418	0.0313	0.04	0.0339	0.0207		0.01319	0.00771	0.0096	0.0089	0.00173	0.00558	-0.00047	-0.00619		0.000173976	5.94441e-05	9.216e-05	7.921e-05	2.9929e-06	3.11364e-05	2.209e-07	3.83161e-05
33.8	0.05789	0.06196	0.0562	0.05495	0.03573	0.04623	0.03643	0.01201		33.8	0.0452	0.0515	0.05	0.0415	0.0311	0.0398	0.0337	0.0206		0.01269	0.01046	0.0062	0.01345	0.00463	0.00643	0.00273	-0.00859		0.000161036	0.000109412	3.844e-05	0.000180902	2.14369e-05	4.13449e-05	7.4529e-06	7.37881e-05
34	0.05869	0.06201	0.05495	0.053	0.03348	0.05058	0.03898	0.01141		34	0.0448	0.0514	0.0497	0.0412	0.0309	0.0396	0.0335	0.0205		0.01389	0.01061	0.00525	0.0118	0.00258	0.01098	0.00548	-0.00909		0.000192932	0.000112572	2.75625e-05	0.00013924	6.6564e-06	0.00012056	3.00304e-05	8.26281e-05
34.2	0.05759	0.06296	0.05585	0.04575	0.03193	0.04323	0.03298	0.00926		34.2	0.0445	0.0515	0.0495	0.0409	0.0306	0.0394	0.0332	0.0204		0.01309	0.01146	0.00635	0.00485	0.00133	0.00383	-0.00022	-0.01114		0.000171348	0.000131332	4.03225e-05	2.35225e-05	1.7689e-06	1.46689e-05	4.84e-08	0.0001241
34.4	0.05779	0.06546	0.05825	0.0451	0.03473	0.04303	0.03703	0.00816		34.4	0.0443	0.0515	0.0493	0.0406	0.0304	0.0392	0.033	0.0203		0.01349	0.01396	0.00895	0.0045	0.00433	0.00383	0.00403	-0.01214		0.00018198	0.000194882	8.01025e-05	2.025e-05	1.87489e-05	1.46689e-05	1.62409e-05	0.00014738
34.6	0.05919	0.06406	0.0602	0.0392	0.02983	0.04383	0.03423	0.01901		34.6	0.0441	0.0514	0.0491	0.0404	0.0302	0.0389	0.0328	0.0201		0.01509	0.01266	0.0111	-0.0012	-0.00037	0.00493	0.00143	-0.00109		0.000227708	0.000160276	0.00012321	1.44e-06	1.369e-07	2.43049e-05	2.0449e-06	1.1881e-06
34.8	0.05539	0.06166	0.06055	0.04535	0.02943	0.04098	0.03433	0.01596		34.8	0.044	0.0513	0.0489	0.0402	0.03	0.0388	0.0326	0.02		0.01139	0.01036	0.01165	0.00515	-0.00057	0.00218	0.00173	-0.00404		0.000129732	0.00010733	0.000135723	2.65225e-05	3.249e-07	4.7524e-06	2.9929e-06	1.63216e-05
35	0.05629	0.06231	0.0587	0.0472	0.04018	0.04173	0.03213	0.01416		35	0.0439	0.0512	0.0488	0.04	0.0298	0.0386	0.0324	0.0199		0.01239	0.01111	0.0099	0.0072	0.01038	0.00313	-0.00027	-0.00574		0.000153512	0.000123432	9.801e-05	5.184e-05	0.000107744	9.7969e-06	7.29e-08	3.29476e-05
35.2	0.05574	0.06156	0.056	0.0483	0.03688	0.04508	0.03708	0.01181		35.2	0.0438	0.051	0.0486	0.0399	0.0297	0.0385	0.0322	0.0197		0.01194	0.01056	0.0074	0.0084	0.00718	0.00658	0.00488	-0.00789		0.000142564	0.000111514	5.476e-05	7.056e-05	5.15524e-05	4.32964e-05	2.38144e-05	6.22521e-05
35.4	0.05394	0.06031	0.05325	0.05325	0.03668	0.04513	0.03883	0.00906		35.4	0.0438	0.0508	0.0484	0.0398	0.0297	0.0384	0.032	0.0196		0.01014	0.00951	0.00485	0.01345	0.00698	0.00673	0.00683	-0.01054		0.00010282	9.04401e-05	2.35225e-05	0.000180902	4.87204e-05	4.52929e-05	4.66489e-05	0.000111092
35.6	0.05269	0.06021	0.05245	0.0504	0.03338	0.04743	0.03358	0.00841		35.6	0.0438	0.0507	0.0483	0.0397	0.0296	0.0382	0.0319	0.0195		0.00889	0.00951	0.00415	0.0107	0.00378	0.00923	0.00168	-0.01109		7.90321e-05	9.04401e-05	1.72225e-05	0.00011449	1.42884e-05	8.51929e-05	2.8224e-06	0.000122988
35.8	0.05499	0.05776	0.0578	0.0475	0.03283	0.04673	0.03438	0.01136		35.8	0.0439	0.0504	0.0482	0.0396	0.0295	0.0381	0.0318	0.0194		0.01109	0.00736	0.0096	0.0079	0.00333	0.00863	0.00258	-0.00804		0.000122988	5.41696e-05	9.216e-05	6.241e-05	1.10889e-05	7.44769e-05	6.6564e-06	6.46416e-05
36	0.05424	0.05836	0.06235	0.04125	0.03028	0.04493	0.03118	0.01271		36	0.0438	0.0502	0.0481	0.0395	0.0294	0.038	0.0317	0.0194		0.01044	0.00816	0.01425	0.00175	0.00088	0.00693	-0.00052	-0.00669		0.000108994	6.65856e-05	0.000203063	3.0625e-06	7.744e-07	4.80249e-05	2.704e-07	4.47561e-05
36.2	0.05639	0.05996	0.0619	0.04245	0.02933	0.04213	0.03298	0.01201		36.2	0.0438	0.0499	0.048	0.0394	0.0294	0.0379	0.0316	0.0193		0.01259	0.01006	0.0139	0.00305	-7e-05	0.00423	0.00138	-0.00729		0.000158508	0.000101204	0.00019321	9.3025e-06	4.9e-09	1.78929e-05	1.9044e-06	5.31441e-05
36.4	0.05639	0.05716	0.05645	0.04335	0.03388	0.04038	0.03208	0.01096		36.4	0.0437	0.0495	0.0479	0.0394	0.0293	0.0378	0.0315	0.0192		0.01269	0.00766	0.00855	0.00395	0.00458	0.00258	0.00058	-0.00824		0.000161036	5.86756e-05	7.31025e-05	1.56025e-05	2.09764e-05	6.6564e-06	3.364e-07	6.78976e-05
36.6	0.05454	0.05821	0.0542	0.0417	0.03768	0.03943	0.03483	0.00936		36.6	0.0436	0.0492	0.0478	0.0393	0.0293	0.0377	0.0315	0.0192		0.01094	0.00901	0.0064	0.0024	0.00838	0.00173	0.00333	-0.00984		0.000119684	8.11801e-05	4.096e-05	5.76e-06	7.02244e-05	2.9929e-06	1.10889e-05	9.68256e-05
36.8	0.05514	0.06226	0.05205	0.0453	0.04013	0.03923	0.02898	0.01001		36.8	0.0434	0.0489	0.0476	0.0392	0.0292	0.0376	0.0314	0.0191		0.01174	0.01336	0.00445	0.0061	0.01093	0.00163	-0.00242	-0.00909		0.000137828	0.00017849	1.98025e-05	3.721e-05	0.000119465	2.6569e-06	5.8564e-06	8.26281e-05
37	0.05299	0.06066	0.05385	0.04555	0.03893	0.04408	0.03513	0.01616		37	0.0432	0.0487	0.0474	0.039	0.0291	0.0374	0.0313	0.0191		0.00979	0.01196	0.00645	0.00655	0.00983	0.00668	0.00383	-0.00294		9.58441e-05	0.000143042	4.16025e-05	4.29025e-05	9.66289e-05	4.46224e-05	1.46689e-05	8.6436e-06
37.2	0.05514	0.05941	0.0544	0.04455	0.02963	0.04338	0.03658	0.01411		37.2	0.043	0.0486	0.0473	0.0389	0.029	0.0373	0.0313	0.0191		0.01214	0.01081	0.0071	0.00565	0.00063	0.00608	0.00528	-0.00499		0.00014738	0.000116856	5.041e-05	3.19225e-05	3.969e-07	3.69664e-05	2.78784e-05	2.49001e-05
37.4	0.05389	0.05621	0.0565	0.05015	0.03318	0.04563	0.03578	0.01136		37.4	0.0427	0.0485	0.0472	0.0387	0.0289	0.0371	0.0312	0.0191		0.01119	0.00771	0.0093	0.01145	0.00428	0.00853	0.00458	-0.00774		0.000125216	5.94441e-05	8.649e-05	0.000131103	1.83184e-05	7.27609e-05	2.09764e-05	5.99076e-05
37.6	0.05264	0.05581	0.0569	0.0482	0.03053	0.04438	0.03398	0.00881		37.6	0.0425	0.0484	0.0472	0.0386	0.0288	0.037	0.0311	0.0191		0.01014	0.00741	0.0097	0.0096	0.00173	0.00738	0.00288	-0.01029		0.00010282	5.49081e-05	9.409e-05	9.216e-05	2.9929e-06	5.44644e-05	8.2944e-06	0.000105884
37.8	0.05324	0.05841	0.0552	0.04585	0.03163	0.03973	0.03353	0.01061		37.8	0.0422	0.0483	0.047	0.0384	0.0286	0.0369	0.031	0.0191		0.01104	0.01011	0.0082	0.00745	0.00303	0.00283	0.00253	-0.00849		0.000121882	0.000102212	6.724e-05	5.55025e-05	9.1809e-06	8.0089e-06	6.4009e-06	7.20801e-05
38	0.05459	0.06056	0.0551	0.03885	0.03138	0.03943	0.03273	0.01031		38	0.042	0.0481	0.0469	0.0383	0.0285	0.0369	0.0309	0.019		0.01259	0.01246	0.0082	0.00055	0.00288	0.00253	0.00183	-0.00869		0.000158508	0.000155252	6.724e-05	3.025e-07	8.2944e-06	6.4009e-06	3.3489e-06	7.55161e-05
38.2	0.05464	0.05766	0.0474	0.04325	0.03253	0.03873	0.03083	0.01721		38.2	0.0417	0.048	0.0467	0.0381	0.0283	0.0368	0.0308	0.019		0.01294	0.00966	0.0007	0.00515	0.00423	0.00193	3e-05	-0.00179		0.000167444	9.33156e-05	4.9e-07	2.65225e-05	1.78929e-05	3.7249e-06	9e-10	3.2041e-06
38.4	0.05509	0.05761	0.04795	0.04425	0.03283	0.04013	0.02953	0.01671		38.4	0.0415	0.0478	0.0466	0.0379	0.0281	0.0367	0.0307	0.0189		0.01359	0.00981	0.00135	0.00635	0.00473	0.00343	-0.00117	-0.00219		0.000184688	9.62361e-05	1.8225e-06	4.03225e-05	2.23729e-05	1.17649e-05	1.3689e-06	4.7961e-06
38.6	0.05259	0.05896	0.05305	0.03845	0.03343	0.04008	0.03128	0.01406		38.6	0.0413	0.0477	0.0464	0.0377	0.028	0.0365	0.0306	0.0189		0.01129	0.01126	0.00665	0.00075	0.00543	0.00358	0.00068	-0.00484		0.000127464	0.000126788	4.42225e-05	5.625e-07	2.94849e-05	1.28164e-05	4.624e-07	2.34256e-05
38.8	0.05104	0.05536	0.05635	0.04335	0.02248	0.04188	0.03273	0.01081		38.8	0.0412	0.0475	0.0462	0.0375	0.0278	0.0364	0.0305	0.0188		0.00984	0.00786	0.01015	0.00585	-0.00532	0.00548	0.00223	-0.00799		9.68256e-05	6.17796e-05	0.000103022	3.42225e-05	2.83024e-05	3.00304e-05	4.9729e-06	6.38401e-05
39	0.05384	0.05586	0.05965	0.0471	0.02468	0.03828	0.03483	0.01076		39	0.041	0.0472	0.046	0.0373	0.0277	0.0362	0.0303	0.0187		0.01284	0.00866	0.01365	0.0098	-0.00302	0.00208	0.00453	-0.00794		0.000164866	7.49956e-05	0.000186323	9.604e-05	9.1204e-06	4.3264e-06	2.05209e-05	6.30436e-05
39.2	0.05314	0.05601	0.0566	0.055	0.02548	0.03953	0.03338	0.01131		39.2	0.0409	0.047	0.0458	0.0372	0.0276	0.0361	0.0302	0.0187		0.01224	0.00901	0.0108	0.0178	-0.00212	0.00343	0.00318	-0.00739		0.000149818	8.11801e-05	0.00011664	0.00031684	4.4944e-06	1.17649e-05	1.01124e-05	5.46121e-05
39.4	0.05264	0.05376	0.05305	0.04695	0.02458	0.04083	0.02838	0.01211		39.4	0.0407	0.0467	0.0456	0.037	0.0275	0.0359	0.03	0.0186		0.01194	0.00706	0.00745	0.00995	-0.00292	0.00493	-0.00162	-0.00649		0.000142564	4.98436e-05	5.55025e-05	9.90025e-05	8.5264e-06	2.43049e-05	2.6244e-06	4.21201e-05
39.6	0.04919	0.05741	0.0511	0.0414	0.02783	0.04243	0.02928	0.01211		39.6	0.0406	0.0464	0.0454	0.0369	0.0274	0.0358	0.0299	0.0185		0.00859	0.01101	0.0057	0.0045	0.00043	0.00663	-0.00062	-0.00639		7.37881e-05	0.00012122	3.249e-05	2.025e-05	1.849e-07	4.39569e-05	3.844e-07	4.08321e-05
39.8	0.05139	0.05711	0.04925	0.0439	0.02928	0.03863	0.03238	0.00931		39.8	0.0405	0.0461	0.0453	0.0367	0.0273	0.0357	0.0298	0.0184		0.01089	0.01101	0.00395	0.0072	0.00198	0.00293	0.00258	-0.00909		0.000118592	0.00012122	1.56025e-05	5.184e-05	3.9204e-06	8.5849e-06	6.6564e-06	8.26281e-05
40	0.05084	0.05451	0.05135	0.0416	0.03228	0.04173	0.03143	0.00981		40	0.0405	0.0458	0.0451	0.0366	0.0272	0.0356	0.0297	0.0183		0.01034	0.00871	0.00625	0.005	0.00508	0.00613	0.00173	-0.00849		0.000106916	7.58641e-05	3.90625e-05	2.5e-05	2.58064e-05	3.75769e-05	2.9929e-06	7.20801e-05
40.2	0.04924	0.05616	0.05395	0.0419	0.03098	0.03753	0.03103	0.01376		40.2	0.0403	0.0456	0.045	0.0365	0.0271	0.0354	0.0296	0.0183		0.00894	0.01056	0.00895	0.0054	0.00388	0.00213	0.00143	-0.00454		7.99236e-05	0.000111514	8.01025e-05	2.916e-05	1.50544e-05	4.5369e-06	2.0449e-06	2.06116e-05
40.4	0.05214	0.05481	0.05675	0.044	0.03183	0.03878	0.03193	0.01396		40.4	0.0402	0.0454	0.0448	0.0364	0.027	0.0353	0.0295	0.0182		0.01194	0.00941	0.01195	0.0076	0.00483	0.00348	0.00243	-0.00424		0.000142564	8.85481e-05	0.000142803	5.776e-05	2.33289e-05	1.21104e-05	5.9049e-06	1.79776e-05
40.6	0.04819	0.05431	0.0562	0.04355	0.03003	0.03918	0.03228	0.01481		40.6	0.0401	0.0452	0.0447	0.0363	0.0269	0.0352	0.0293	0.0182		0.00809	0.00911	0.0115	0.00725	0.00313	0.00398	0.00298	-0.00339		6.54481e-05	8.29921e-05	0.00013225	5.25625e-05	9.7969e-06	1.58404e-05	8.8804e-06	1.14921e-05
40.8	0.04769	0.05531	0.0521	0.04265	0.02873	0.03783	0.02978	0.01001		40.8	0.0398	0.045	0.0446	0.0362	0.0268	0.0351	0.0293	0.0181		0.00789	0.01031	0.0075	0.00645	0.00193	0.00273	0.00048	-0.00809		6.22521e-05	0.000106296	5.625e-05	4.16025e-05	3.7249e-06	7.4529e-06	2.304e-07	6.54481e-05
41	0.04974	0.05426	0.05115	0.0411	0.02733	0.03723	0.02953	0.00726		41	0.0396	0.0447	0.0444	0.036	0.0267	0.035	0.0292	0.0181		0.01014	0.00956	0.00675	0.0051	0.00063	0.00223	0.00033	-0.01084		0.00010282	9.13936e-05	4.55625e-05	2.601e-05	3.969e-07	4.9729e-06	1.089e-07	0.000117506
41.2	0.04819	0.05396	0.049	0.0409	0.03198	0.03843	0.03073	0.00751		41.2	0.0393	0.0444	0.0442	0.0359	0.0266	0.0348	0.0291	0.018		0.00889	0.00956	0.0048	0.005	0.00538	0.00363	0.00163	-0.01049		7.90321e-05	9.13936e-05	2.304e-05	2.5e-05	2.89444e-05	1.31769e-05	2.6569e-06	0.00011004
41.4	0.05029	0.05276	0.04935	0.0388	0.02698	0.03703	0.03208	0.01116		41.4	0.039	0.0441	0.044	0.0357	0.0265	0.0347	0.029	0.018		0.01129	0.00866	0.00535	0.0031	0.00048	0.00233	0.00308	-0.00684		0.000127464	7.49956e-05	2.86225e-05	9.61e-06	2.304e-07	5.4289e-06	9.4864e-06	4.67856e-05
41.6	0.04959	0.05296	0.05065	0.0386	0.02923	0.03738	0.02848	0.01136		41.6	0.0387	0.0438	0.0438	0.0355	0.0263	0.0346	0.0289	0.0179		0.01089	0.00916	0.00685	0.0031	0.00293	0.00278	-0.00042	-0.00654		0.000118592	8.39056e-05	4.69225e-05	9.61e-06	8.5849e-06	7.7284e-06	1.764e-07	4.27716e-05
41.8	0.04749	0.05171	0.05215	0.03705	0.02728	0.03913	0.02818	0.00976		41.8	0.0385	0.0434	0.0436	0.0353	0.0262	0.0344	0.0288	0.0179		0.00899	0.00831	0.00855	0.00175	0.00108	0.00473	-0.00062	-0.00814		8.08201e-05	6.90561e-05	7.31025e-05	3.0625e-06	1.1664e-06	2.23729e-05	3.844e-07	6.62596e-05
42	0.04894	0.05311	0.05355	0.041	0.02618	0.03608	0.02908	0.00941		42	0.0382	0.043	0.0433	0.0351	0.026	0.0342	0.0287	0.0178		0.01074	0.01011	0.01025	0.0059	0.00018	0.00188	0.00038	-0.00839		0.000115348	0.000102212	0.000105063	3.481e-05	3.24e-08	3.5344e-06	1.444e-07	7.03921e-05
42.2	0.04619	0.05396	0.05175	0.04185	0.03158	0.03663	0.03038	0.00876		42.2	0.0379	0.0426	0.043	0.0348	0.0259	0.034	0.0285	0.0178		0.00829	0.01136	0.00875	0.00705	0.00568	0.00263	0.00188	-0.00904		6.87241e-05	0.00012905	7.65625e-05	4.97025e-05	3.22624e-05	6.9169e-06	3.5344e-06	8.17216e-05
42.4	0.04959	0.05606	0.0507	0.04045	0.02878	0.03888	0.03053	0.00996		42.4	0.0376	0.0422	0.0427	0.0346	0.0257	0.0338	0.0284	0.0177		0.01199	0.01386	0.008	0.00585	0.00308	0.00508	0.00213	-0.00774		0.00014376	0.0001921	6.4e-05	3.42225e-05	9.4864e-06	2.58064e-05	4.5369e-06	5.99076e-05
42.6	0.04819	0.05531	0.05005	0.0381	0.02698	0.03883	0.03068	0.00851		42.6	0.0372	0.0418	0.0424	0.0343	0.0255	0.0337	0.0283	0.0177		0.01099	0.01351	0.00765	0.0038	0.00148	0.00513	0.00238	-0.00919		0.00012078	0.00018252	5.85225e-05	1.444e-05	2.1904e-06	2.63169e-05	5.6644e-06	8.44561e-05
42.8	0.04599	0.05246	0.0485	0.03855	0.02783	0.03848	0.03108	0.00956		42.8	0.0369	0.0414	0.0421	0.0341	0.0254	0.0335	0.0281	0.0176		0.00909	0.01106	0.0064	0.00445	0.00243	0.00498	0.00298	-0.00804		8.26281e-05	0.000122324	4.096e-05	1.98025e-05	5.9049e-06	2.48004e-05	8.8804e-06	6.46416e-05
43	0.04864	0.05051	0.0484	0.0369	0.02498	0.03823	0.02843	0.00856		43	0.0366	0.0411	0.0417	0.0338	0.0252	0.0333	0.028	0.0175		0.01204	0.00941	0.0067	0.0031	-0.00022	0.00493	0.00043	-0.00894		0.000144962	8.85481e-05	4.489e-05	9.61e-06	4.84e-08	2.43049e-05	1.849e-07	7.99236e-05
43.2	0.04649	0.05156	0.05035	0.03665	0.02758	0.03773	0.02968	0.00916		43.2	0.0363	0.0408	0.0414	0.0336	0.025	0.0331	0.0278	0.0175		0.01019	0.01076	0.00895	0.00305	0.00258	0.00463	0.00188	-0.00834		0.000103836	0.000115778	8.01025e-05	9.3025e-06	6.6564e-06	2.14369e-05	3.5344e-06	6.95556e-05
43.4	0.04749	0.05216	0.05365	0.036	0.02453	0.03543	0.02988	0.01016		43.4	0.036	0.0406	0.0412	0.0333	0.0248	0.0329	0.0276	0.0174		0.01149	0.01156	0.01245	0.0027	-0.00027	0.00253	0.00228	-0.00724		0.00013202	0.000133634	0.000155003	7.29e-06	7.29e-08	6.4009e-06	5.1984e-06	5.24176e-05
43.6	0.04729	0.05231	0.0527	0.03435	0.02638	0.03433	0.02868	0.01291		43.6	0.0358	0.0405	0.0409	0.0331	0.0247	0.0326	0.0275	0.0173		0.01149	0.01181	0.0118	0.00125	0.00168	0.00173	0.00118	-0.00439		0.00013202	0.000139476	0.00013924	1.5625e-06	2.8224e-06	2.9929e-06	1.3924e-06	1.92721e-05
43.8	0.04729	0.05266	0.0528	0.03725	0.02298	0.03433	0.02828	0.01031		43.8	0.0356	0.0403	0.0407	0.0328	0.0245	0.0324	0.0273	0.0172		0.01169	0.01236	0.0121	0.00445	-0.00152	0.00193	0.00098	-0.00689		0.000136656	0.00015277	0.00014641	1.98025e-05	2.3104e-06	3.7249e-06	9.604e-07	4.74721e-05
44	0.04649	0.05086	0.0493	0.03915	0.02158	0.03593	0.02783	0.00956		44	0.0355	0.0402	0.0406	0.0326	0.0243	0.0323	0.0271	0.0172		0.01099	0.01066	0.0087	0.00655	-0.00272	0.00363	0.00073	-0.00764		0.00012078	0.000113636	7.569e-05	4.29025e-05	7.3984e-06	1.31769e-05	5.329e-07	5.83696e-05
44.2	0.04674	0.05146	0.04805	0.03755	0.02343	0.03593	0.02998	0.00706		44.2	0.0353	0.04	0.0404	0.0324	0.0241	0.0321	0.027	0.0171		0.01144	0.01146	0.00765	0.00515	-0.00067	0.00383	0.00298	-0.01004		0.000130874	0.000131332	5.85225e-05	2.65225e-05	4.489e-07	1.46689e-05	8.8804e-06	0.000100802
44.4	0.04719	0.05261	0.04565	0.03615	0.02563	0.03548	0.03133	0.00961		44.4	0.0352	0.0399	0.0403	0.0322	0.024	0.032	0.0268	0.017		0.01199	0.01271	0.00535	0.00395	0.00163	0.00348	0.00453	-0.00739		0.00014376	0.000161544	2.86225e-05	1.56025e-05	2.6569e-06	1.21104e-05	2.05209e-05	5.46121e-05
44.6	0.04729	0.05216	0.04615	0.0371	0.02828	0.03678	0.02868	0.00986		44.6	0.035	0.0398	0.0402	0.032	0.0238	0.0318	0.0267	0.0169		0.01229	0.01236	0.00595	0.0051	0.00448	0.00498	0.00198	-0.00704		0.000151044	0.00015277	3.54025e-05	2.601e-05	2.00704e-05	2.48004e-05	3.9204e-06	4.95616e-05
44.8	0.04609	0.04986	0.04985	0.0359	0.02888	0.03453	0.02768	0.01051		44.8	0.0349	0.0397	0.04	0.0319	0.0237	0.0317	0.0265	0.0168		0.01119	0.01016	0.00985	0.004	0.00518	0.00283	0.00118	-0.00629		0.000125216	0.000103226	9.70225e-05	1.6e-05	2.68324e-05	8.0089e-06	1.3924e-06	3.95641e-05
45	0.04699	0.04971	0.05325	0.0371	0.02798	0.03543	0.02808	0.01136		45	0.0347	0.0396	0.0399	0.0317	0.0235	0.0315	0.0264	0.0167		0.01229	0.01011	0.01335	0.0054	0.00448	0.00393	0.00168	-0.00534		0.000151044	0.000102212	0.000178223	2.916e-05	2.00704e-05	1.54449e-05	2.8224e-06	2.85156e-05
45.2	0.04599	0.05076	0.0523	0.0377	0.02728	0.03353	0.02513	0.00841		45.2	0.0346	0.0395	0.0398	0.0315	0.0234	0.0314	0.0262	0.0166		0.01139	0.01126	0.0125	0.0062	0.00388	0.00213	-0.00107	-0.00819		0.000129732	0.000126788	0.00015625	3.844e-05	1.50544e-05	4.5369e-06	1.1449e-06	6.70761e-05
45.4	0.04659	0.05291	0.0505	0.0341	0.02363	0.03453	0.02718	0.00736		45.4	0.0345	0.0393	0.0396	0.0314	0.0232	0.0312	0.0261	0.0165		0.01209	0.01361	0.0109	0.0027	0.00043	0.00333	0.00108	-0.00914		0.000146168	0.000185232	0.00011881	7.29e-06	1.849e-07	1.10889e-05	1.1664e-06	8.35396e-05
45.6	0.04589	0.05141	0.0507	0.03605	0.02418	0.03353	0.02683	0.00771		45.6	0.0344	0.0392	0.0395	0.0312	0.0231	0.0311	0.0259	0.0165		0.01149	0.01221	0.0112	0.00485	0.00108	0.00243	0.00093	-0.00879		0.00013202	0.000149084	0.00012544	2.35225e-05	1.1664e-06	5.9049e-06	8.649e-07	7.72641e-05
45.8	0.04404	0.05271	0.0466	0.0353	0.02283	0.03348	0.02963	0.00861		45.8	0.0343	0.0391	0.0394	0.0311	0.023	0.031	0.0258	0.0164		0.00974	0.01361	0.0072	0.0042	-0.00017	0.00248	0.00383	-0.00779		9.48676e-05	0.000185232	5.184e-05	1.764e-05	2.89e-08	6.1504e-06	1.46689e-05	6.06841e-05
46	0.04539	0.05376	0.04435	0.03335	0.02278	0.03633	0.02643	0.01136		46	0.0343	0.039	0.0393	0.031	0.0229	0.0309	0.0256	0.0163		0.01109	0.01476	0.00505	0.00235	-0.00012	0.00543	0.00083	-0.00494		0.000122988	0.000217858	2.55025e-05	5.5225e-06	1.44e-08	2.94849e-05	6.889e-07	2.44036e-05
46.2	0.04674	0.05201	0.04465	0.0328	0.02378	0.03248	0.02758	0.00981		46.2	0.0342	0.0389	0.0392	0.0309	0.0228	0.0308	0.0255	0.0163		0.01254	0.01311	0.00545	0.0019	0.00098	0.00168	0.00208	-0.00649		0.000157252	0.000171872	2.97025e-05	3.61e-06	9.604e-07	2.8224e-06	4.3264e-06	4.21201e-05
46.4	0.04624	0.05291	0.04875	0.0358	0.02723	0.03363	0.03103	0.00736		46.4	0.0342	0.039	0.0391	0.0308	0.0227	0.0307	0.0254	0.0162		0.01204	0.01391	0.00965	0.005	0.00453	0.00293	0.00563	-0.00884		0.000144962	0.000193488	9.31225e-05	2.5e-05	2.05209e-05	8.5849e-06	3.16969e-05	7.81456e-05
46.6	0.04724	0.05141	0.0517	0.0466	0.02863	0.03508	0.02793	0.01066		46.6	0.0342	0.039	0.0391	0.0308	0.0227	0.0306	0.0253	0.0162		0.01304	0.01241	0.0126	0.0158	0.00593	0.00448	0.00263	-0.00554		0.000170042	0.000154008	0.00015876	0.00024964	3.51649e-05	2.00704e-05	6.9169e-06	3.06916e-05
46.8	0.04604	0.05051	0.0501	0.04465	0.02538	0.03683	0.02843	0.01001		46.8	0.0343	0.0391	0.0391	0.0307	0.0226	0.0305	0.0253	0.0161		0.01174	0.01141	0.011	0.01395	0.00278	0.00633	0.00313	-0.00609		0.000137828	0.000130188	0.000121	0.000194603	7.7284e-06	4.00689e-05	9.7969e-06	3.70881e-05
47	0.04504	0.05151	0.04935	0.0386	0.02493	0.03528	0.02653	0.00871		47	0.0344	0.039	0.0391	0.0306	0.0225	0.0304	0.0252	0.0161		0.01064	0.01251	0.01025	0.008	0.00243	0.00488	0.00133	-0.00739		0.00011321	0.0001565	0.000105062	6.4e-05	5.9049e-06	2.38144e-05	1.7689e-06	5.46121e-05
47.2	0.04474	0.05021	0.0471	0.03695	0.02658	0.03478	0.02498	0.00856		47.2	0.0345	0.0388	0.0392	0.0306	0.0225	0.0304	0.0251	0.0161		0.01024	0.01141	0.0079	0.00635	0.00408	0.00438	-0.00012	-0.00754		0.000104858	0.000130188	6.241e-05	4.03225e-05	1.66464e-05	1.91844e-05	1.44e-08	5.68516e-05
47.4	0.04339	0.05036	0.0447	0.03415	0.02898	0.03458	0.02648	0.00771		47.4	0.0344	0.0385	0.0392	0.0306	0.0225	0.0304	0.0251	0.0161		0.00899	0.01186	0.0055	0.00355	0.00648	0.00418	0.00138	-0.00839		8.08201e-05	0.00014066	3.025e-05	1.26025e-05	4.19904e-05	1.74724e-05	1.9044e-06	7.03921e-05
47.6	0.04449	0.04966	0.04425	0.03365	0.03108	0.03538	0.02823	0.00836		47.6	0.0342	0.0382	0.0391	0.0306	0.0225	0.0304	0.0251	0.0161		0.01029	0.01146	0.00515	0.00305	0.00858	0.00498	0.00313	-0.00774		0.000105884	0.000131332	2.65225e-05	9.3025e-06	7.36164e-05	2.48004e-05	9.7969e-06	5.99076e-05
47.8	0.04344	0.05141	0.04425	0.03575	0.03043	0.03278	0.02813	0.00731		47.8	0.034	0.0378	0.0389	0.0306	0.0225	0.0304	0.025	0.016		0.00944	0.01361	0.00535	0.00515	0.00793	0.00238	0.00313	-0.00869		8.91136e-05	0.000185232	2.86225e-05	2.65225e-05	6.28849e-05	5.6644e-06	9.7969e-06	7.55161e-05
48	0.04314	0.05241	0.04545	0.038	0.02963	0.03303	0.02708	0.00756		48	0.0337	0.0376	0.0387	0.0306	0.0225	0.0303	0.025	0.016		0.00944	0.01481	0.00675	0.0074	0.00713	0.00273	0.00208	-0.00844		8.91136e-05	0.000219336	4.55625e-05	5.476e-05	5.08369e-05	7.4529e-06	4.3264e-06	7.12336e-05
48.2	0.04269	0.04981	0.0487	0.0374	0.02923	0.03248	0.02798	0.00896		48.2	0.0334	0.0374	0.0385	0.0305	0.0224	0.0302	0.025	0.016		0.00929	0.01241	0.0102	0.0069	0.00683	0.00228	0.00298	-0.00704		8.63041e-05	0.000154008	0.00010404	4.761e-05	4.66489e-05	5.1984e-06	8.8804e-06	4.95616e-05
48.4	0.04459	0.05231	0.04615	0.0396	0.02468	0.03468	0.02628	0.00896		48.4	0.0331	0.0373	0.0382	0.0303	0.0223	0.0301	0.025	0.016		0.01149	0.01501	0.00795	0.0093	0.00238	0.00458	0.00128	-0.00704		0.00013202	0.0002253	6.32025e-05	8.649e-05	5.6644e-06	2.09764e-05	1.6384e-06	4.95616e-05
48.6	0.04489	0.05211	0.04795	0.0353	0.02278	0.03363	0.02608	0.01151		48.6	0.033	0.0373	0.038	0.0301	0.0222	0.0299	0.0249	0.016		0.01189	0.01481	0.00995	0.0052	0.00058	0.00373	0.00118	-0.00449		0.000141372	0.000219336	9.90025e-05	2.704e-05	3.364e-07	1.39129e-05	1.3924e-06	2.01601e-05
48.8	0.04354	0.04961	0.0485	0.03385	0.02673	0.03263	0.02638	0.00766		48.8	0.0329	0.0374	0.0379	0.0299	0.0221	0.0297	0.0248	0.016		0.01064	0.01221	0.0106	0.00395	0.00463	0.00293	0.00158	-0.00834		0.00011321	0.000149084	0.00011236	1.56025e-05	2.14369e-05	8.5849e-06	2.4964e-06	6.95556e-05
49	0.04274	0.05016	0.04595	0.03295	0.02728	0.03193	0.02558	0.00691		49	0.0329	0.0373	0.0379	0.0297	0.022	0.0296	0.0247	0.0159		0.00984	0.01286	0.00805	0.00325	0.00528	0.00233	0.00088	-0.00899		9.68256e-05	0.00016538	6.48025e-05	1.05625e-05	2.78784e-05	5.4289e-06	7.744e-07	8.08201e-05
49.2	0.04394	0.05191	0.0443	0.03685	0.03073	0.03128	0.02598	0.00726		49.2	0.0329	0.0372	0.0378	0.0296	0.0219	0.0295	0.0246	0.0159		0.01104	0.01471	0.0065	0.00725	0.00883	0.00178	0.00138	-0.00864		0.000121882	0.000216384	4.225e-05	5.25625e-05	7.79689e-05	3.1684e-06	1.9044e-06	7.46496e-05
49.4	0.04344	0.05251	0.0434	0.0367	0.02888	0.03313	0.02588	0.01131		49.4	0.0329	0.037	0.0378	0.0295	0.0218	0.0295	0.0245	0.0159		0.01054	0.01551	0.0056	0.0072	0.00708	0.00363	0.00138	-0.00459		0.000111092	0.00024056	3.136e-05	5.184e-05	5.01264e-05	1.31769e-05	1.9044e-06	2.10681e-05
49.6	0.04304	0.05251	0.0433	0.0361	0.02738	0.03453	0.02753	0.01041		49.6	0.0328	0.0368	0.0378	0.0295	0.0218	0.0295	0.0244	0.0158		0.01024	0.01571	0.0055	0.0066	0.00558	0.00503	0.00313	-0.00539		0.000104858	0.000246804	3.025e-05	4.356e-05	3.11364e-05	2.53009e-05	9.7969e-06	2.90521e-05
49.8	0.04249	0.05171	0.04445	0.03975	0.02538	0.03398	0.02883	0.00971		49.8	0.0326	0.0366	0.0377	0.0295	0.0217	0.0295	0.0244	0.0158		0.00989	0.01511	0.00675	0.01025	0.00368	0.00448	0.00443	-0.00609		9.78121e-05	0.000228312	4.55625e-05	0.000105063	1.35424e-05	2.00704e-05	1.96249e-05	3.70881e-05
50	0.04239	0.05001	0.045	0.0376	0.02483	0.03468	0.02748	0.00906		50	0.0324	0.0364	0.0375	0.0294	0.0216	0.0295	0.0244	0.0158		0.00999	0.01361	0.0075	0.0082	0.00323	0.00518	0.00308	-0.00674		9.98001e-05	0.000185232	5.625e-05	6.724e-05	1.04329e-05	2.68324e-05	9.4864e-06	4.54276e-05
50.2	0.04259	0.05041	0.04595	0.0335	0.02613	0.03388	0.02698	0.00796		50.2	0.0322	0.0364	0.0374	0.0293	0.0215	0.0294	0.0243	0.0158		0.01039	0.01401	0.00855	0.0042	0.00463	0.00448	0.00268	-0.00784		0.000107952	0.00019628	7.31025e-05	1.764e-05	2.14369e-05	2.00704e-05	7.1824e-06	6.14656e-05
50.4	0.04254	0.04936	0.04655	0.0344	0.02563	0.03033	0.02438	0.00691		50.4	0.032	0.0365	0.0372	0.0291	0.0214	0.0292	0.0242	0.0157		0.01054	0.01286	0.00935	0.0053	0.00423	0.00113	0.00018	-0.00879		0.000111092	0.00016538	8.74225e-05	2.809e-05	1.78929e-05	1.2769e-06	3.24e-08	7.72641e-05
50.6	0.04204	0.04721	0.0469	0.03245	0.02723	0.03223	0.02578	0.00696		50.6	0.0319	0.0367	0.0371	0.029	0.0213	0.0291	0.0241	0.0157		0.01014	0.01051	0.0098	0.00345	0.00593	0.00313	0.00168	-0.00874		0.00010282	0.00011046	9.604e-05	1.19025e-05	3.51649e-05	9.7969e-06	2.8224e-06	7.63876e-05
50.8	0.04019	0.04906	0.0447	0.03315	0.02708	0.03233	0.02558	0.01161		50.8	0.0319	0.0368	0.0371	0.0288	0.0212	0.0289	0.024	0.0156		0.00829	0.01226	0.0076	0.00435	0.00588	0.00343	0.00158	-0.00399		6.87241e-05	0.000150308	5.776e-05	1.89225e-05	3.45744e-05	1.17649e-05	2.4964e-06	1.59201e-05
51	0.04139	0.05221	0.0451	0.03345	0.02838	0.03128	0.02553	0.00841		51	0.0319	0.0367	0.0371	0.0287	0.0211	0.0288	0.0239	0.0156		0.00949	0.01551	0.008	0.00475	0.00728	0.00248	0.00163	-0.00719		9.00601e-05	0.00024056	6.4e-05	2.25625e-05	5.29984e-05	6.1504e-06	2.6569e-06	5.16961e-05
51.2	0.04239	0.05371	0.04835	0.03225	0.02573	0.03063	0.02433	0.00726		51.2	0.032	0.0366	0.0371	0.0286	0.021	0.0288	0.0238	0.0155		0.01039	0.01711	0.01125	0.00365	0.00473	0.00183	0.00053	-0.00824		0.000107952	0.000292752	0.000126562	1.33225e-05	2.23729e-05	3.3489e-06	2.809e-07	6.78976e-05
51.4	0.04139	0.05551	0.04905	0.03665	0.02133	0.03273	0.02803	0.00786		51.4	0.032	0.0364	0.037	0.0286	0.021	0.0287	0.0237	0.0154		0.00939	0.01911	0.01205	0.00805	0.00033	0.00403	0.00433	-0.00754		8.81721e-05	0.000365192	0.000145203	6.48025e-05	1.089e-07	1.62409e-05	1.87489e-05	5.68516e-05
51.6	0.04179	0.05151	0.04905	0.03475	0.02613	0.03153	0.02648	0.00711		51.6	0.0319	0.0362	0.037	0.0286	0.0209	0.0288	0.0236	0.0154		0.00989	0.01531	0.01205	0.00615	0.00523	0.00273	0.00288	-0.00829		9.78121e-05	0.000234396	0.000145203	3.78225e-05	2.73529e-05	7.4529e-06	8.2944e-06	6.87241e-05
51.8	0.04184	0.05046	0.04605	0.03135	0.02563	0.03168	0.02643	0.01131		51.8	0.0318	0.0359	0.0369	0.0286	0.0209	0.0288	0.0236	0.0154		0.01004	0.01456	0.00915	0.00275	0.00473	0.00288	0.00283	-0.00409		0.000100802	0.000211994	8.37225e-05	7.5625e-06	2.23729e-05	8.2944e-06	8.0089e-06	1.67281e-05
52	0.04174	0.04981	0.0467	0.0337	0.02628	0.03248	0.02408	0.01006		52	0.0317	0.0358	0.0368	0.0286	0.0209	0.0287	0.0235	0.0153		0.01004	0.01401	0.0099	0.0051	0.00538	0.00378	0.00058	-0.00524		0.000100802	0.00019628	9.801e-05	2.601e-05	2.89444e-05	1.42884e-05	3.364e-07	2.74576e-05
52.2	0.04159	0.05051	0.0458	0.03215	0.02628	0.03213	0.02638	0.00931		52.2	0.0316	0.0357	0.0366	0.0285	0.0208	0.0287	0.0235	0.0153		0.00999	0.01481	0.0092	0.00365	0.00548	0.00343	0.00288	-0.00599		9.98001e-05	0.000219336	8.464e-05	1.33225e-05	3.00304e-05	1.17649e-05	8.2944e-06	3.58801e-05
52.4	0.04234	0.04901	0.0442	0.03025	0.02803	0.03283	0.02643	0.00961		52.4	0.0316	0.0358	0.0365	0.0284	0.0208	0.0285	0.0235	0.0153		0.01074	0.01321	0.0077	0.00185	0.00723	0.00433	0.00293	-0.00569		0.000115348	0.000174504	5.929e-05	3.4225e-06	5.22729e-05	1.87489e-05	8.5849e-06	3.23761e-05
52.6	0.04139	0.04846	0.0439	0.0321	0.02723	0.03203	0.02578	0.00716		52.6	0.0316	0.036	0.0365	0.0283	0.0207	0.0284	0.0234	0.0153		0.00979	0.01246	0.0074	0.0038	0.00653	0.00363	0.00238	-0.00814		9.58441e-05	0.000155252	5.476e-05	1.444e-05	4.26409e-05	1.31769e-05	5.6644e-06	6.62596e-05
52.8	0.04189	0.04981	0.0443	0.0347	0.02803	0.03218	0.02773	0.00786		52.8	0.0316	0.0362	0.0365	0.0282	0.0206	0.0283	0.0233	0.0153		0.01029	0.01361	0.0078	0.0065	0.00743	0.00388	0.00443	-0.00744		0.000105884	0.000185232	6.084e-05	4.225e-05	5.52049e-05	1.50544e-05	1.96249e-05	5.53536e-05
53	0.04054	0.04801	0.04655	0.0356	0.02718	0.03193	0.02558	0.01456		53	0.0316	0.0364	0.0366	0.0281	0.0205	0.0283	0.0232	0.0153		0.00894	0.01161	0.00995	0.0075	0.00668	0.00363	0.00238	-0.00074		7.99236e-05	0.000134792	9.90025e-05	5.625e-05	4.46224e-05	1.31769e-05	5.6644e-06	5.476e-07
53.2	0.04124	0.04881	0.04805	0.0364	0.02553	0.03183	0.02553	0.01186		53.2	0.0317	0.0364	0.0367	0.0281	0.0205	0.0282	0.0232	0.0152		0.00954	0.01241	0.01135	0.0083	0.00503	0.00363	0.00233	-0.00334		9.10116e-05	0.000154008	0.000128822	6.889e-05	2.53009e-05	1.31769e-05	5.4289e-06	1.11556e-05
53.4	0.04109	0.05056	0.046	0.0338	0.02408	0.03078	0.02488	0.01056		53.4	0.0318	0.0364	0.0368	0.0281	0.0205	0.0282	0.0231	0.0152		0.00929	0.01416	0.0092	0.0057	0.00358	0.00258	0.00178	-0.00464		8.63041e-05	0.000200506	8.464e-05	3.249e-05	1.28164e-05	6.6564e-06	3.1684e-06	2.15296e-05
53.6	0.03969	0.04791	0.0456	0.0334	0.02448	0.02938	0.02538	0.00836		53.6	0.0318	0.0363	0.0368	0.0282	0.0205	0.0283	0.0231	0.0152		0.00789	0.01161	0.0088	0.0052	0.00398	0.00108	0.00228	-0.00684		6.22521e-05	0.000134792	7.744e-05	2.704e-05	1.58404e-05	1.1664e-06	5.1984e-06	4.67856e-05
53.8	0.04064	0.04806	0.0439	0.0344	0.02483	0.02958	0.02413	0.00651		53.8	0.0318	0.0363	0.0368	0.0283	0.0205	0.0283	0.0231	0.0152		0.00884	0.01176	0.0071	0.0061	0.00433	0.00128	0.00103	-0.00869		7.81456e-05	0.000138298	5.041e-05	3.721e-05	1.87489e-05	1.6384e-06	1.0609e-06	7.55161e-05
54	0.04084	0.04751	0.04185	0.03395	0.02583	0.02893	0.02758	0.00726		54	0.0318	0.0362	0.0368	0.0283	0.0206	0.0284	0.0231	0.0152		0.00904	0.01131	0.00505	0.00565	0.00523	0.00053	0.00448	-0.00794		8.17216e-05	0.000127916	2.55025e-05	3.19225e-05	2.73529e-05	2.809e-07	2.00704e-05	6.30436e-05
54.2	0.04159	0.04726	0.0421	0.034	0.02768	0.03103	0.02573	0.00611		54.2	0.0318	0.0362	0.0367	0.0283	0.0205	0.0283	0.0231	0.0152		0.00979	0.01106	0.0054	0.0057	0.00718	0.00273	0.00263	-0.00909		9.58441e-05	0.000122324	2.916e-05	3.249e-05	5.15524e-05	7.4529e-06	6.9169e-06	8.26281e-05
54.4	0.04069	0.04511	0.04545	0.03155	0.02603	0.03038	0.02628	0.01371		54.4	0.0318	0.0361	0.0367	0.0282	0.0205	0.0283	0.0231	0.0152		0.00889	0.00901	0.00875	0.00335	0.00553	0.00208	0.00318	-0.00149		7.90321e-05	8.11801e-05	7.65625e-05	1.12225e-05	3.05809e-05	4.3264e-06	1.01124e-05	2.2201e-06
54.6	0.04009	0.04501	0.045	0.0318	0.02658	0.02943	0.02558	0.01146		54.6	0.0318	0.0361	0.0367	0.0282	0.0205	0.0283	0.0231	0.0152		0.00829	0.00891	0.0083	0.0036	0.00608	0.00113	0.00248	-0.00374		6.87241e-05	7.93881e-05	6.889e-05	1.296e-05	3.69664e-05	1.2769e-06	6.1504e-06	1.39876e-05
54.8	0.04179	0.04626	0.0444	0.0348	0.02683	0.03263	0.02483	0.01091		54.8	0.0318	0.0361	0.0367	0.0281	0.0204	0.0282	0.0231	0.0152		0.00999	0.01016	0.0077	0.0067	0.00643	0.00443	0.00173	-0.00429		9.98001e-05	0.000103226	5.929e-05	4.489e-05	4.13449e-05	1.96249e-05	2.9929e-06	1.84041e-05
55	0.04049	0.04616	0.0447	0.03425	0.02593	0.03088	0.02518	0.00861		55	0.0317	0.0361	0.0367	0.0281	0.0204	0.0282	0.023	0.0152		0.00879	0.01006	0.008	0.00615	0.00553	0.00268	0.00218	-0.00659		7.72641e-05	0.000101204	6.4e-05	3.78225e-05	3.05809e-05	7.1824e-06	4.7524e-06	4.34281e-05
55.2	0.04019	0.04836	0.0437	0.0363	0.02438	0.03133	0.02708	0.00791		55.2	0.0317	0.0361	0.0367	0.0281	0.0204	0.0282	0.023	0.0151		0.00849	0.01226	0.007	0.0082	0.00398	0.00313	0.00408	-0.00719		7.20801e-05	0.000150308	4.9e-05	6.724e-05	1.58404e-05	9.7969e-06	1.66464e-05	5.16961e-05
55.4	0.03954	0.04836	0.04	0.03365	0.02603	0.03108	0.02533	0.00911		55.4	0.0317	0.0361	0.0366	0.0281	0.0204	0.0282	0.023	0.0151		0.00784	0.01226	0.0034	0.00555	0.00563	0.00288	0.00233	-0.00599		6.14656e-05	0.000150308	1.156e-05	3.08025e-05	3.16969e-05	8.2944e-06	5.4289e-06	3.58801e-05
55.6	0.04109	0.04606	0.0408	0.03345	0.02588	0.03258	0.02628	0.00806		55.6	0.0316	0.036	0.0366	0.0281	0.0204	0.0282	0.023	0.0151		0.00949	0.01006	0.0042	0.00535	0.00548	0.00438	0.00328	-0.00704		9.00601e-05	0.000101204	1.764e-05	2.86225e-05	3.00304e-05	1.91844e-05	1.07584e-05	4.95616e-05
55.8	0.03924	0.04586	0.0403	0.028	0.02653	0.03048	0.02703	0.01056		55.8	0.0316	0.036	0.0366	0.0281	0.0204	0.0282	0.023	0.0151		0.00764	0.00986	0.0037	-0.0001	0.00613	0.00228	0.00403	-0.00454		5.83696e-05	9.72196e-05	1.369e-05	1e-08	3.75769e-05	5.1984e-06	1.62409e-05	2.06116e-05
56	0.04089	0.04686	0.04255	0.03015	0.02328	0.03063	0.02338	0.01326		56	0.0316	0.0359	0.0366	0.0281	0.0204	0.0282	0.023	0.0152		0.00929	0.01096	0.00595	0.00205	0.00288	0.00243	0.00038	-0.00194		8.63041e-05	0.000120122	3.54025e-05	4.2025e-06	8.2944e-06	5.9049e-06	1.444e-07	3.7636e-06
56.2	0.03964	0.04566	0.0474	0.0316	0.02688	0.03163	0.02453	0.01221		56.2	0.0316	0.0359	0.0365	0.0281	0.0204	0.0282	0.023	0.0152		0.00804	0.00976	0.0109	0.0035	0.00648	0.00343	0.00153	-0.00299		6.46416e-05	9.52576e-05	0.00011881	1.225e-05	4.19904e-05	1.17649e-05	2.3409e-06	8.9401e-06
56.4	0.04044	0.04701	0.04665	0.03495	0.02383	0.03103	0.02658	0.00876		56.4	0.0316	0.0359	0.0365	0.0281	0.0204	0.0282	0.023	0.0152		0.00884	0.01111	0.01015	0.00685	0.00343	0.00283	0.00358	-0.00644		7.81456e-05	0.000123432	0.000103022	4.69225e-05	1.17649e-05	8.0089e-06	1.28164e-05	4.14736e-05
56.6	0.03984	0.04766	0.0441	0.0367	0.02303	0.02678	0.02953	0.00726		56.6	0.0316	0.0359	0.0365	0.0281	0.0204	0.0281	0.023	0.0152		0.00824	0.01176	0.0076	0.0086	0.00263	-0.00132	0.00653	-0.00794		6.78976e-05	0.000138298	5.776e-05	7.396e-05	6.9169e-06	1.7424e-06	4.26409e-05	6.30436e-05
56.8	0.03959	0.04881	0.04155	0.03715	0.02368	0.03143	0.02478	0.00686		56.8	0.0316	0.0359	0.0365	0.0281	0.0204	0.0281	0.023	0.0152		0.00799	0.01291	0.00505	0.00905	0.00328	0.00333	0.00178	-0.00834		6.38401e-05	0.000166668	2.55025e-05	8.19025e-05	1.07584e-05	1.10889e-05	3.1684e-06	6.95556e-05
57	0.03969	0.04786	0.04115	0.035	0.02653	0.03098	0.02458	0.00656		57	0.0316	0.0359	0.0365	0.028	0.0204	0.0281	0.023	0.0152		0.00809	0.01196	0.00465	0.007	0.00613	0.00288	0.00158	-0.00864		6.54481e-05	0.000143042	2.16225e-05	4.9e-05	3.75769e-05	8.2944e-06	2.4964e-06	7.46496e-05
57.2	0.04039	0.04791	0.0403	0.03245	0.02473	0.03228	0.02583	0.01061		57.2	0.0315	0.0359	0.0365	0.028	0.0203	0.0281	0.023	0.0152		0.00889	0.01201	0.0038	0.00445	0.00443	0.00418	0.00283	-0.00459		7.90321e-05	0.00014424	1.444e-05	1.98025e-05	1.96249e-05	1.74724e-05	8.0089e-06	2.10681e-05
57.4	0.04034	0.04641	0.044	0.0335	0.02658	0.03008	0.02678	0.00926		57.4	0.0315	0.0359	0.0365	0.028	0.0203	0.0281	0.0229	0.0151		0.00884	0.01051	0.0075	0.0055	0.00628	0.00198	0.00388	-0.00584		7.81456e-05	0.00011046	5.625e-05	3.025e-05	3.94384e-05	3.9204e-06	1.50544e-05	3.41056e-05
57.6	0.03999	0.04511	0.0445	0.0347	0.02628	0.03228	0.02723	0.00916		57.6	0.0314	0.0359	0.0365	0.028	0.0203	0.0281	0.0229	0.0151		0.00859	0.00921	0.008	0.0067	0.00598	0.00418	0.00433	-0.00594		7.37881e-05	8.48241e-05	6.4e-05	4.489e-05	3.57604e-05	1.74724e-05	1.87489e-05	3.52836e-05
57.8	0.04029	0.04691	0.04435	0.03565	0.02483	0.03128	0.02218	0.00806		57.8	0.0314	0.0359	0.0364	0.028	0.0203	0.0281	0.0229	0.0151		0.00889	0.01101	0.00795	0.00765	0.00453	0.00318	-0.00072	-0.00704		7.90321e-05	0.00012122	6.32025e-05	5.85225e-05	2.05209e-05	1.01124e-05	5.184e-07	4.95616e-05
58	0.03929	0.04796	0.0429	0.03775	0.02178	0.03178	0.02563	0.00641		58	0.0313	0.0359	0.0364	0.0279	0.0203	0.0281	0.0229	0.0151		0.00799	0.01206	0.0065	0.00985	0.00148	0.00368	0.00273	-0.00869		6.38401e-05	0.000145444	4.225e-05	9.70225e-05	2.1904e-06	1.35424e-05	7.4529e-06	7.55161e-05
58.2	0.03889	0.04771	0.04365	0.03545	0.02333	0.03128	0.02398	0.00636		58.2	0.0313	0.0359	0.0364	0.0279	0.0202	0.028	0.0229	0.0151		0.00759	0.01181	0.00725	0.00755	0.00313	0.00328	0.00108	-0.00874		5.76081e-05	0.000139476	5.25625e-05	5.70025e-05	9.7969e-06	1.07584e-05	1.1664e-06	7.63876e-05
58.4	0.03924	0.04696	0.0409	0.03015	0.02478	0.03193	0.02653	0.00866		58.4	0.0314	0.0359	0.0364	0.0279	0.0202	0.028	0.0229	0.0151		0.00784	0.01106	0.0045	0.00225	0.00458	0.00393	0.00363	-0.00644		6.14656e-05	0.000122324	2.025e-05	5.0625e-06	2.09764e-05	1.54449e-05	1.31769e-05	4.14736e-05
58.6	0.04034	0.04641	0.0404	0.03315	0.02518	0.03053	0.02438	0.01056		58.6	0.0314	0.0358	0.0364	0.0279	0.0202	0.028	0.0228	0.0151		0.00894	0.01061	0.004	0.00525	0.00498	0.00253	0.00158	-0.00454		7.99236e-05	0.000112572	1.6e-05	2.75625e-05	2.48004e-05	6.4009e-06	2.4964e-06	2.06116e-05
58.8	0.03974	0.04586	0.04215	0.03125	0.02648	0.03018	0.02423	0.00891		58.8	0.0313	0.0358	0.0363	0.0279	0.0202	0.028	0.0228	0.0151		0.00844	0.01006	0.00585	0.00335	0.00628	0.00218	0.00143	-0.00619		7.12336e-05	0.000101204	3.42225e-05	1.12225e-05	3.94384e-05	4.7524e-06	2.0449e-06	3.83161e-05
59										59	0.0313	0.0357	0.0363	0.0278	0.0202	0.028	0.0228	0.0151		-0.0313	-0.0357	-0.0363	-0.0278	-0.0202	-0.028	-0.0228	-0.0151		0.00097969	0.00127449	0.00131769	0.00077284	0.00040804	0.000784	0.00051984	0.00022801
59.2										59.2	0.0313	0.0356	0.0363	0.0278	0.0202	0.028	0.0228	0.0151		-0.0313	-0.0356	-0.0363	-0.0278	-0.0202	-0.028	-0.0228	-0.0151		0.00097969	0.00126736	0.00131769	0.00077284	0.00040804	0.000784	0.00051984	0.00022801
59.4										59.4	0.0312	0.0354	0.0362	0.0278	0.0201	0.028	0.0228	0.0151		-0.0312	-0.0354	-0.0362	-0.0278	-0.0201	-0.028	-0.0228	-0.0151		0.00097344	0.00125316	0.00131044	0.00077284	0.00040401	0.000784	0.00051984	0.00022801
59.6										59.6	0.0311	0.0353	0.0362	0.0278	0.0201	0.0279	0.0227	0.015		-0.0311	-0.0353	-0.0362	-0.0278	-0.0201	-0.0279	-0.0227	-0.015		0.00096721	0.00124609	0.00131044	0.00077284	0.00040401	0.00077841	0.00051529	0.000225
59.8										59.8	0.031	0.0351	0.0361	0.0278	0.0201	0.0279	0.0227	0.015		-0.031	-0.0351	-0.0361	-0.0278	-0.0201	-0.0279	-0.0227	-0.015		0.000961	0.00123201	0.00130321	0.00077284	0.00040401	0.00077841	0.00051529	0.000225
											0.0309	0.035	0.0359	0.0278	0.0201	0.0279	0.0227	0.015		-0.0309	-0.035	-0.0359	-0.0278	-0.0201	-0.0279	-0.0227	-0.015		0.00095481	0.001225	0.00128881	0.00077284	0.00040401	0.00077841	0.00051529	0.000225

## Sheet: Pea_Coor_Coef
t	S3	S4	S5	S6	S7	S8	S9	S10		t	HEC_P3	HEC_P4	HEC_P5	HEC_P6	HEC_P7	HEC_P8	HEC_P9	HEC_P10		HEC_1B_2_P3	HEC_1B_2_P4	HEC_1B_2_P5	HEC_1B_2_P6	HEC_1B_2_P7	HEC_1B_2_P8	HEC_1B_2_P9	HEC_1B_2_P10		HEC_1B_5_P3	HEC_1B_5_P4	HEC_1B_5_P5	HEC_1B_5_P6	HEC_1B_5_P7	HEC_1B_5_P8	HEC_1B_5_P9	HEC_1B_5_P10			HEC_Dif_P3	HEC_Dif_P4	HEC_Dif_P5	HEC_Dif_P6	HEC_Dif_P7	HEC_Dif_P8	HEC_Dif_P9	HEC_Dif_P10
0	-1e-05	-4e-05	0	-0.00015	-2e-05	-7e-05	3e-05	1e-05		0	0	0	0	0	0	0	0	0		0	0	0	0	0	0	0	0		0	0	0	0	0	0	0	0			0	0	0	0	0	0	0	0
0.2	-6e-05	1e-05	-5e-05	0.00015	8e-05	0.00013	-0.00017	1e-05		0.2	0	0	0	0	0	0	0	0		0	0	0	0	0	0	0	0		0	0	0	0	0	0	0	0			0	0	0	0	0	0	0	0
0.4	0.00014	0.00011	5e-05	5e-05	3e-05	3e-05	-2e-05	1e-05		0.4	0	0	0	0	0	0	0	0		0	0	0	0	0	0	0	0		0	0	0	0	0	0	0	0			0	0	0	0	0	0	0	0
0.6	-1e-05	-9e-05	-0.0001	-5e-05	-7e-05	8e-05	-2e-05	-4e-05		0.6	0	0	0	0	0	0	0	0		0	0	0	0	0	0	0	0		0	0	0	0	0	0	0	0			0	0	0	0	0	0	0	0
0.8	-0.00016	-4e-05	5e-05	-5e-05	-0.00012	8e-05	-2e-05	6e-05		0.8	0	0	0	0	0	0	0	0		0	0	0	0	0	0	0	0		0	0	0	0	0	0	0	0			0	0	0	0	0	0	0	0
1	4e-05	1e-05	0.00015	-0.00015	-0.00017	0.00018	-7e-05	1e-05		1	0	0	0	0	0	0	0	0		0	0	0	0	0	0	0	0		0	0	0	0	0	0	0	0			0	0	0	0	0	0	0	0
1.2	-6e-05	0.00011	-0.0001	0.0002	0.00013	8e-05	-2e-05	-4e-05		1.2	0	0	0	0	0	0	0	0		0	0	0	0	0	0	0	0		0	0	0	0	0	0	0	0			0	0	0	0	0	0	0	0
1.4	0.00039	-9e-05	0.00015	0	0.00013	0.00033	-7e-05	-4e-05		1.4	0	0	0	0	0	0	0	0		0	0	0	0	0	0	0	0		0	0	0	0	0	0	0	0			0	0	0	0	0	0	0	0
1.6	-6e-05	1e-05	5e-05	-5e-05	8e-05	3e-05	-2e-05	-4e-05		1.6	0	0	0	0	0	0	0	0		0	0	0	0	0	0	0	0		0	0	0	0	0	0	0	0			0	0	0	0	0	0	0	0
1.8	-0.00016	1e-05	0.0001	-5e-05	-2e-05	-2e-05	3e-05	-4e-05		1.8	0	0	0	0	0	0	0	0		0	0	0	0	0	0	0	0		0	0	0	0	0	0	0	0			0	0	0	0	0	0	0	0
2	9e-05	0.00011	0	-0.00015	-2e-05	-7e-05	3e-05	1e-05		2	0	0	0	0	0	0	0	0		0	0	0	0	0	0	0	0		0	0	0	0	0	0	0	0			0	0	0	0	0	0	0	0
2.2	-1e-05	-0.00014	0	0.00015	8e-05	-0.00017	3e-05	6e-05		2.2	0	0	0	0	0	0	0	0		0	0	0	0	0	0	0	0		0	0	0	0	0	0	0	0			0	0	0	0	0	0	0	0
2.4	9e-05	1e-05	-0.00015	0	-2e-05	-7e-05	8e-05	6e-05		2.4	0	0	0	0	0	0	0	0		0	0	0	0	0	0	0	0		0	0	0	0	0	0	0	0			0	0	0	0	0	0	0	0
2.6	-6e-05	1e-05	5e-05	0	-7e-05	-0.00022	8e-05	0.00011		2.6	0	0	0	0	0	0	0	0		0	0	0	0	0	0	0	0		0	0	0	0	0	0	0	0			0	0	0	0	0	0	0	0
2.8	-0.00016	0.00011	-0.0001	-5e-05	-0.00012	-0.00012	0.00013	0.00011		2.8	0	0	0	0	0	0	0	0		0	0	0	0	0	0	0	0		0	0	0	0	0	0	0	0			0	0	0	0	0	0	0	0
3	4e-05	-9e-05	0	-0.00015	-0.00012	-0.00017	0.00013	0.00011		3	0	0	0	0	0	0	0	0		0	0	0	0	0	0	0	0		0	0	0	0	0	0	0	0			0	0	0	0	0	0	0	0
3.2	-1e-05	-4e-05	-0.0001	0.00015	0.00023	-7e-05	0.00028	0.00011		3.2	0	0	0	0	0	0	0	0		0	0	0	0	0	0	0	0		0	0	0	0	0	0	0	0			0	0	0	0	0	0	0	0
3.4	-0.00011	-4e-05	0.0001	0	0.00013	-0.00017	3e-05	0.00036		3.4	0	0	0	0	0	0	0	0		0	0	0	0	0	0	0	0		0	0	0	0	0	0	0	0			0	0	0	0	0	0	0	0
3.6	-6e-05	0.00011	0.0001	0	-2e-05	-7e-05	-0.00012	0.00011		3.6	0	0	0	0	0	0	0	0		0	0	0	0	0	0	0	0		0	0	0	0	0	0	0	0			0	0	0	0	0	0	0	0
3.8	-0.00011	-9e-05	0	-0.0001	-2e-05	-0.00017	-0.00012	1e-05		3.8	0	0	0	0	0	0	0	0		0	0	0	0	0	0	0	0		0	0	0	0	0	0	0	0			0	0	0	0	0	0	0	0
4	9e-05	6e-05	0.0003	-0.0002	-2e-05	-7e-05	-0.00022	-9e-05		4	0	0	0	0	0	0	0	0		0	0	0	0	0	0	0	0		0	0	0	0	0	0	0	0			0	0	0	0	0	0	0	0
4.2	-6e-05	1e-05	-5e-05	0.0001	3e-05	-0.00017	-0.00012	-0.00014		4.2	0	0	0	0	0	0	0	0		0	0	0	0	0	0	0	0		0	0	0	0	0	0	0	0			0	0	0	0	0	0	0	0
4.4	-0.00016	0.00011	0.00015	0	-2e-05	3e-05	-0.00012	-0.00014		4.4	0	0	0	0	0	0	0	0		0	0	0	0	0	0	0	0		0	0	0	0	0	0	0	0			0	0	0	0	0	0	0	0
4.6	-6e-05	-0.00014	-5e-05	-0.0001	-7e-05	-0.00012	-7e-05	-0.00014		4.6	0	0	0	0	0	0	0	0		0	0	0	0	0	0	0	0		0	0	0	0	0	0	0	0			0	0	0	0	0	0	0	0
4.8	-0.00011	1e-05	0.0001	-0.0001	-0.00017	3e-05	-0.00012	-0.00014		4.8	0	0	0	0	0	0	0	0		0	0	0	0	0	0	0	0		0	0	0	0	0	0	0	0			0	0	0	0	0	0	0	0
5	9e-05	1e-05	-0.0001	-0.0002	-7e-05	-7e-05	-0.00012	-0.00014		5	0	0	0	0	0	0	0	0		0	0	0	0	0	0	0	0		0	0	0	0	0	0	0	0			0	0	0	0	0	0	0	0
5.2	-1e-05	0.00016	5e-05	0.0001	0.00013	3e-05	-7e-05	-9e-05		5.2	0	0	0	0	0	0	0	0		0	0	0	0	0	0	0	0		0	0	0	0	0	0	0	0			0	0	0	0	0	0	0	0
5.4	-0.00021	-0.00014	-0.0001	-5e-05	0.00013	-7e-05	-2e-05	-9e-05		5.4	0	0	0	0	0	0	0	0		0	0	0	0	0	0	0	0		0	0	0	0	0	0	0	0			0	0	0	0	0	0	0	0
5.6	-1e-05	1e-05	0	0	3e-05	8e-05	-2e-05	-4e-05		5.6	0	0	0	0	0	0	0	0		0	0	0	0	0	0	0	0		0	0	0	0	0	0	0	0			0	0	0	0	0	0	0	0
5.8	-6e-05	1e-05	-0.00015	-0.0001	-2e-05	-2e-05	3e-05	-4e-05		5.8	0	0	0	0	0	0	0	0		0	0	0	0	0	0	0	0		0	0	0	0	0	0	0	0			0	0	0	0	0	0	0	0
6	9e-05	0.00011	5e-05	-0.00015	-2e-05	0.00028	-2e-05	1e-05		6	0	0	0	0	0	0	0	0		0	0	0	0	0	0	0	0		0	0	0	0	0	0	0	0			0	0	0	0	0	0	0	0
6.2	4e-05	-9e-05	5e-05	5e-05	3e-05	-7e-05	-7e-05	-4e-05		6.2	0	0	0	0	0	0	0	0		0	0	0	0	0	0	0	0		0	0	0	0	0	0	0	0			0	0	0	0	0	0	0	0
6.4	-0.00016	1e-05	0.0001	-5e-05	-7e-05	-2e-05	3e-05	-9e-05		6.4	0	0	0	0	0	0	0	0		0	0	0	0	0	0	0	0		0	0	0	0	0	0	0	0			0	0	0	0	0	0	0	0
6.6	4e-05	1e-05	0.00035	0	-7e-05	-7e-05	-7e-05	6e-05		6.6	0	0	0	0	0	0	0	0		0	0	0	0	0	0	0	0		0	0	0	0	0	0	0	0			0	0	0	0	0	0	0	0
6.8	-0.00011	0.00011	0	-0.0001	-0.00012	-0.00022	-7e-05	-4e-05		6.8	0	0	0	0	0	0	0	0		0	0	0	0	0	0	0	0		0	0	0	0	0	0	0	0			0	0	0	0	0	0	0	0
7	9e-05	-9e-05	0.00015	-5e-05	-2e-05	-0.00017	-7e-05	-4e-05		7	0	0	0	0	0	0	0	0		0	0	0	0	0	0	0	0		0	0	0	0	0	0	0	0			0	0	0	0	0	0	0	0
7.2	-6e-05	1e-05	0	5e-05	0.00013	-0.00022	-7e-05	1e-05		7.2	0	0	0	0	0	0	0	0		0	0	0	0	0	0	0	0		0	0	0	0	0	0	0	0			0	0	0	0	0	0	0	0
7.4	-0.00016	1e-05	5e-05	-5e-05	8e-05	-0.00012	-2e-05	-4e-05		7.4	0	0	0	0	0	0	0	0		0	0	0	0	0	0	0	0		0	0	0	0	0	0	0	0			0	0	0	0	0	0	0	0
7.6	-1e-05	0.00016	-0.0001	0	3e-05	-0.00022	-2e-05	1e-05		7.6	0	0	0	0	0	0	0	0		0	0	0	0	0	0	0	0		0	0	0	0	0	0	0	0			0	0	0	0	0	0	0	0
7.8	-0.00011	-9e-05	5e-05	-0.00015	-2e-05	-7e-05	-2e-05	1e-05		7.8	0	0	0	0	0	0	0	0		0	0	0	0	0	0	0	0		0	0	0	0	0	0	0	0			0	0	0	0	0	0	0	0
8	0.00029	1e-05	-0.00015	0.00015	3e-05	-0.00022	-2e-05	1e-05		8	0	0	0	0	0	0	0	0		0	0	0	0	0	0	0	0		0	0	0	0	0	0	0	0			0	0	0	0	0	0	0	0
8.2	-0.00011	1e-05	0	0.0001	-2e-05	-7e-05	3e-05	1e-05		8.2	0	0	0	0	0	0	0	0		0	0	0	0	0	0	0	0		0	0	0	0	0	0	0	0			0	0	0	0	0	0	0	0
8.4	-0.00016	0.00021	-0.0002	-5e-05	-2e-05	-0.00022	3e-05	6e-05		8.4	0	0	0	0	0	0	0	0		0	0	0	0	0	0	0	0		0	0	0	0	0	0	0	0			0	0	0	0	0	0	0	0
8.6	-1e-05	-0.00014	5e-05	-5e-05	-0.00012	3e-05	8e-05	0.00011		8.6	0	0	0	0	0	0	0	0		0	0	0	0	0	0	0	0		0	0	0	0	0	0	0	0			0	0	0	0	0	0	0	0
8.8	-6e-05	-4e-05	-5e-05	-0.00015	-0.00017	-0.00017	8e-05	6e-05		8.8	0	0	0	0	0	0	0	0		0	0	0	0	0	0	0	0		0	0	0	0	0	0	0	0			0	0	0	0	0	0	0	0
9	4e-05	1e-05	5e-05	0.00025	3e-05	-2e-05	0.00028	0.00011		9	0	0	0	0	0	0	0	0		0	0	0	0	0	0	0	0		0	0	0	0	0	0	0	0			0	0	0	0	0	0	0	0
9.2	-0.00011	0.00031	0.00035	5e-05	8e-05	-0.00012	3e-05	0.00016		9.2	0	0	0	0	0	0	0	0		0	0	0	0	0	0	0	0		0	0	0	0	0	0	0	0			0	0	0	0	0	0	0	0
9.4	-0.00016	-0.00014	-5e-05	-5e-05	3e-05	-2e-05	-7e-05	0.00016		9.4	0	0	0	0	0	0	0	0		0	0	0	0	0	0	0	0		0	0	0	0	0	0	0	0			0	0	0	0	0	0	0	0
9.6	4e-05	-0.00024	0.0001	-5e-05	-2e-05	-0.00012	-0.00017	6e-05		9.6	0	0	0	0	0	0	0	0		0	0	0	0	0	0	0	0		0	0	0	0	0	0	0	0			0	0	0	0	0	0	0	0
9.8	-1e-05	1e-05	-5e-05	-0.00015	-7e-05	8e-05	-0.00012	-0.00014		9.8	0	0	0	0	0	0	0	0		0	0	0	0	0	0	0	0		0	0	0	0	0	0	0	0			0	0	0	0	0	0	0	0
10	-0.00011	0.00041	0	0.0001	3e-05	-7e-05	-0.00017	-0.00019		10	0	0	0	0	0	0	0	0		0	0	0	0	0	0	0	0		0	0	0	0	0	0	0	0			0	0	0	0	0	0	0	0
10.2	-0.00011	-4e-05	-0.0001	-5e-05	-2e-05	0.00023	-0.00017	-0.00019		10.2	0	0	0	0	0	0	0	0		0	0	0	0	0	0	0	0		0	0	0	0	0	0	0	0			0	0	0	0	0	0	0	0
10.4	-0.00016	-0.00024	5e-05	-5e-05	-2e-05	-0.00012	-0.00017	-0.00014		10.4	0	0	0	0	0	0	0	0		0	0	0	0	0	0	0	0		0	0	0	0	0	0	0	0			0	0	0	0	0	0	0	0
10.6	4e-05	1e-05	-0.00015	-5e-05	-0.00012	-0.00012	-0.00012	-0.00019		10.6	0	0	0	0	0	0	0	0		0	0	0	0	0	0	0	0		0	0	0	0	0	0	0	0			0	0	0	0	0	0	0	0
10.8	-6e-05	0.00066	-5e-05	-0.0002	-0.00017	-0.00017	-0.00012	-0.00014		10.8	0	0	0	0	0	0	0	0		0	0	0	0	0	0	0	0		0	0	0	0	0	0	0	0			0	0	0	0	0	0	0	0
11	-0.00016	0.01081	-0.00015	0.0001	0.00013	-0.00027	-7e-05	-0.00014		11	0	0	0	0	0	0	0	0		0	0	0	0	0	0	0	0		0	0	0	0	0	0	0	0			0	0.0131	0	0	0	0	0	0
11.2	0.00204	0.01051	5e-05	0	8e-05	-0.00012	-7e-05	-9e-05		11.2	0	0	0	0	0	0	0	0		0	0	0	0	0	0	0	0		0	0	0	0	0	0	0	0			0.0121	0.0192	0	0	0	0	0	0
11.4	0.00929	0.01211	0.00365	0	3e-05	-0.00032	-7e-05	-9e-05		11.4	0	0.0038	0	0	0	0	0	0		0	0	0	0	0	0	0	0		0	0	0	0	0	0	0	0			0.0182	0.0228	0.0124	0	0	0	0	0
11.6	0.01154	0.01786	0.01275	-0.0001	3e-05	-0.00017	-2e-05	-4e-05		11.6	0	0.0322	0	0	0	0	0	0		0	0.0392	0	0	0	0	0	0		0	0.03	0	0	0	0	0	0			0.0225	0.0255	0.0194	0	0	0	0	0
11.8	0.01224	0.02656	0.01795	-0.0002	-0.00012	-0.00027	-2e-05	-4e-05		11.8	0.035	0.0706	0	0	0	0	0	0		0.0339	0.0735	0	0	0	0	0	0		0.007	0.045	0	0	0	0	0	0			0.0254	0.0277	0.0238	0	0	0	0	0
12	0.01389	0.03236	0.0167	0.0028	-0.00012	-0.00017	-0.00017	-4e-05		12	0.0545	0.0708	0.0386	0	0	0	0	0		0.0369	0.0715	0	0	0	0	0	0		0.0381	0.0633	0	0	0	0	0	0			0.0277	0.0295	0.0268	0.0103	0	0.0081	0	0
12.2	0.01684	0.03216	0.01835	0.00595	-7e-05	-0.00022	-2e-05	-0.00019		12.2	0.0531	0.0672	0.028	0	0	0	0	0		0.0533	0.0677	0.03	0	0	0	0	0		0.0506	0.0698	0.0405	0	0	0	0	0			0.0296	0.031	0.0291	0.0153	0	0.0177	0	0
12.4	0.01794	0.03646	0.0221	0.00635	0.00508	0.00563	-7e-05	1e-05		12.4	0.0507	0.0689	0.0522	0	0	0	0	0		0.0494	0.0615	0.0688	0	0	0	0	0		0.0566	0.0677	0.0522	0	0	0	0	0			0.0312	0.0323	0.031	0.0189	0.0104	0.0219	0.0076	0
12.6	0.01994	0.03596	0.0244	0.0134	0.00718	0.01163	-7e-05	1e-05		12.6	0.052	0.0741	0.0475	0.0151	0	0	0	0		0.0535	0.0638	0.045	0	0	0	0	0		0.0604	0.0672	0.0633	0	0	0	0	0			0.0325	0.0334	0.0327	0.0222	0.0164	0.0251	0.0148	0
12.8	0.02579	0.04336	0.0287	0.01565	0.00888	0.01123	-7e-05	-4e-05		12.8	0.0612	0.0781	0.0432	0.0192	0	0.0137	0	0		0.0547	0.0715	0.0453	0.0209	0	0	0	0		0.0615	0.0665	0.0558	0.0247	0	0	0	0			0.0337	0.0344	0.0341	0.0249	0.0198	0.0278	0.0201	0
13	0.03714	0.05026	0.03785	0.01655	0.00933	0.02568	0.00263	-4e-05		13	0.0603	0.0792	0.0753	0.0175	0.0151	0.0102	0	0		0.057	0.0767	0.0513	0.0168	0	0.0135	0	0		0.0601	0.0652	0.056	0.024	0	0.0213	0	0			0.0346	0.0353	0.0354	0.0268	0.0222	0.03	0.0234	0.0092
13.2	0.04459	0.05761	0.0466	0.01715	0.00873	0.03688	0.00498	-4e-05		13.2	0.0587	0.0777	0.0724	0.0403	0.0107	0.0268	0	0		0.0596	0.0787	0.065	0.0292	0.0126	0.0301	0	0		0.0579	0.0668	0.0618	0.0384	0.0164	0.0359	0	0			0.0355	0.036	0.0364	0.0284	0.0241	0.0317	0.0258	0.016
13.4	0.04989	0.06971	0.0498	0.02405	0.01243	0.03593	0.00293	-4e-05		13.4	0.0645	0.08	0.0693	0.0311	0.0112	0.0278	0.0078	0		0.0608	0.0795	0.0659	0.0328	0.0106	0.0272	0.0081	0		0.0567	0.0689	0.0623	0.0334	0.0205	0.0359	0.0109	0			0.0362	0.0367	0.0373	0.0296	0.0255	0.033	0.0276	0.0206
13.6	0.06959	0.07761	0.0514	0.02615	0.01448	0.03508	0.00383	0.00116		13.6	0.064	0.0832	0.0679	0.0248	0.0116	0.0345	0.0049	0		0.0617	0.0809	0.066	0.0331	0.0144	0.0336	0.007	0		0.0564	0.0718	0.0615	0.0374	0.023	0.0353	0.0112	0			0.0368	0.0373	0.038	0.0306	0.0266	0.0342	0.029	0.0238
13.8	0.07604	0.09786	0.0611	0.0335	0.01423	0.03808	0.00793	0.00371		13.8	0.0713	0.0853	0.0666	0.0328	0.0114	0.0328	0.0071	0		0.0614	0.0805	0.0657	0.0365	0.0172	0.0376	0.0085	0		0.0556	0.0744	0.0625	0.0426	0.0239	0.0384	0.0126	0			0.0373	0.0378	0.0387	0.0314	0.0276	0.0351	0.0302	0.0263
14	0.07349	0.09986	0.0654	0.03585	0.01748	0.04083	0.01478	0.00296		14	0.0711	0.0859	0.0708	0.0313	0.0309	0.0315	0.0199	0		0.0643	0.0824	0.067	0.0398	0.0311	0.0361	0.013	0		0.0554	0.0766	0.0633	0.0449	0.0334	0.0377	0.0258	0			0.0378	0.0382	0.0393	0.0322	0.0284	0.0359	0.0312	0.0282
14.2	0.07234	0.09626	0.0739	0.0494	0.01353	0.03683	0.01713	0.00521		14.2	0.0715	0.0859	0.0744	0.0395	0.0318	0.0332	0.02	0		0.066	0.082	0.0681	0.0406	0.0318	0.0368	0.0204	0		0.0588	0.0768	0.0636	0.0499	0.0346	0.038	0.031	0.0085			0.0382	0.0386	0.0397	0.0328	0.0291	0.0366	0.032	0.0296
14.4	0.07174	0.07411	0.0755	0.05075	0.01613	0.03723	0.01978	0.01086		14.4	0.072	0.0853	0.0746	0.0426	0.0297	0.0368	0.03	0.0129		0.0674	0.082	0.0697	0.0526	0.0319	0.0373	0.0263	0.0093		0.062	0.0792	0.0642	0.0504	0.0345	0.0426	0.0334	0.012			0.0385	0.0389	0.0402	0.0333	0.0297	0.0372	0.0327	0.0306
14.6	0.06834	0.06826	0.077	0.0545	0.02118	0.03538	0.02338	0.01176		14.6	0.0708	0.0853	0.0746	0.0447	0.0307	0.0344	0.025	0.0197		0.0689	0.082	0.072	0.0499	0.0327	0.04	0.0289	0.0227		0.0634	0.0774	0.0647	0.0502	0.0342	0.0448	0.0347	0.0199			0.0388	0.0392	0.0405	0.0338	0.0302	0.0377	0.0333	0.0315
14.8	0.06979	0.06686	0.071	0.05585	0.02933	0.04408	0.01983	0.00971		14.8	0.0704	0.0852	0.0745	0.0516	0.0303	0.0363	0.0271	0.0146		0.0691	0.0832	0.0724	0.05	0.0336	0.0417	0.0308	0.0187		0.0638	0.0808	0.0665	0.0519	0.0353	0.0464	0.0388	0.0203			0.0391	0.0395	0.0409	0.0342	0.0306	0.0382	0.0338	0.0321
15	0.06729	0.05431	0.0706	0.05295	0.02458	0.04708	0.02123	0.00966		15	0.071	0.0865	0.0756	0.0462	0.0313	0.0363	0.0301	0.0137		0.0683	0.0826	0.0731	0.0519	0.0334	0.0425	0.0331	0.017		0.0642	0.0811	0.0688	0.0536	0.0362	0.0472	0.0385	0.0226			0.0394	0.0397	0.0411	0.0345	0.031	0.0385	0.0342	0.0327
15.2	0.05639	0.06126	0.0714	0.05065	0.02568	0.04873	0.02823	0.01201		15.2	0.0707	0.087	0.0752	0.0437	0.032	0.039	0.0318	0.0161		0.0684	0.0836	0.0738	0.0502	0.0337	0.0442	0.034	0.0168		0.0644	0.0823	0.0707	0.0542	0.0375	0.0476	0.0381	0.0243			0.0396	0.04	0.0414	0.0348	0.0313	0.0389	0.0346	0.0331
15.4	0.05179	0.05901	0.07695	0.0519	0.02878	0.04558	0.02578	0.01696		15.4	0.0727	0.0885	0.073	0.0463	0.0337	0.0398	0.0313	0.0197		0.0674	0.0843	0.0743	0.05	0.0342	0.0458	0.035	0.0187		0.0644	0.0822	0.0713	0.0543	0.0393	0.0482	0.0381	0.025			0.0398	0.0401	0.0416	0.0351	0.0316	0.0391	0.0349	0.0335
15.6	0.04294	0.05846	0.07595	0.06815	0.03343	0.04438	0.02938	0.01666		15.6	0.0735	0.0897	0.0721	0.046	0.0344	0.04	0.0317	0.0223		0.0679	0.0838	0.0736	0.0495	0.0356	0.0462	0.0369	0.021		0.064	0.0823	0.0723	0.0544	0.0403	0.0485	0.0391	0.0239			0.0399	0.0403	0.0418	0.0353	0.0318	0.0394	0.0351	0.0338
15.8	0.05719	0.06526	0.0763	0.06585	0.03823	0.04713	0.02868	0.01861		15.8	0.0754	0.0889	0.0726	0.0473	0.0345	0.043	0.0341	0.0177		0.0693	0.0838	0.0731	0.0492	0.0369	0.0457	0.0372	0.0222		0.0646	0.0815	0.0731	0.0545	0.041	0.0493	0.0404	0.0245			0.0401	0.0404	0.042	0.0355	0.032	0.0396	0.0354	0.0341
16	0.05904	0.06071	0.0817	0.0582	0.03218	0.05343	0.03658	0.01636		16	0.0742	0.09	0.0754	0.0509	0.0349	0.0455	0.0375	0.0168		0.0718	0.0837	0.0729	0.0504	0.0399	0.0459	0.0387	0.0214		0.0654	0.0811	0.0725	0.0561	0.0412	0.0508	0.0414	0.0238			0.0402	0.0405	0.0421	0.0357	0.0322	0.0397	0.0356	0.0343
16.2	0.06914	0.06146	0.0814	0.06375	0.02833	0.05068	0.03503	0.02056		16.2	0.0744	0.0909	0.0774	0.0525	0.0342	0.0484	0.0387	0.018		0.0725	0.0839	0.0735	0.0525	0.0409	0.0467	0.0395	0.0215		0.0663	0.0807	0.0727	0.0575	0.042	0.0513	0.042	0.0243			0.0402	0.0406	0.0422	0.0358	0.0323	0.0399	0.0357	0.0345
16.4	0.06989	0.07661	0.0782	0.05895	0.03993	0.05153	0.03643	0.01381		16.4	0.0747	0.0903	0.079	0.0523	0.0372	0.0495	0.0415	0.0208		0.0721	0.0846	0.0743	0.054	0.042	0.0484	0.0404	0.022		0.0672	0.081	0.0728	0.058	0.0426	0.0518	0.0422	0.0244			0.0402	0.0406	0.0422	0.0359	0.0324	0.04	0.0358	0.0347
16.6	0.07379	0.06681	0.082	0.0592	0.04083	0.05138	0.03693	0.01701		16.6	0.076	0.0922	0.0783	0.0529	0.0412	0.0502	0.0425	0.0213		0.0725	0.0861	0.0754	0.0553	0.0425	0.0505	0.0426	0.0225		0.0675	0.0828	0.073	0.0588	0.0432	0.0525	0.0425	0.0246			0.0402	0.0405	0.0422	0.0359	0.0325	0.04	0.0359	0.0348
16.8	0.07604	0.08126	0.07955	0.06915	0.04373	0.05268	0.03763	0.02261		16.8	0.0767	0.0918	0.0775	0.0559	0.0438	0.0499	0.0447	0.0215		0.0727	0.0873	0.0762	0.0566	0.0432	0.0515	0.0438	0.0228		0.0688	0.0831	0.0743	0.0589	0.0438	0.0526	0.0433	0.0246			0.0401	0.0404	0.0422	0.0359	0.0325	0.0401	0.036	0.0349
17	0.07794	0.07866	0.0755	0.06865	0.04203	0.05548	0.04463	0.02211		17	0.0774	0.0913	0.0765	0.0575	0.0461	0.0499	0.0434	0.0215		0.0727	0.0871	0.0764	0.0577	0.0434	0.0517	0.0448	0.023		0.0691	0.0833	0.0756	0.0593	0.044	0.0537	0.0434	0.0247			0.04	0.0403	0.0421	0.0359	0.0325	0.04	0.036	0.0349
17.2	0.07469	0.07716	0.08105	0.06565	0.03713	0.05258	0.04333	0.01911		17.2	0.0778	0.0922	0.0767	0.0575	0.0457	0.0525	0.0438	0.0211		0.0731	0.0869	0.0763	0.0584	0.0438	0.0525	0.045	0.0227		0.0696	0.083	0.0759	0.0603	0.0445	0.0545	0.0443	0.0252			0.0398	0.0401	0.042	0.0358	0.0324	0.04	0.0359	0.0349
17.4	0.07719	0.07941	0.082	0.06695	0.04623	0.05003	0.04313	0.01546		17.4	0.0775	0.0923	0.0774	0.0593	0.0447	0.0538	0.0457	0.0214		0.0736	0.0861	0.0763	0.0593	0.0446	0.0535	0.0453	0.0231		0.0698	0.0833	0.076	0.061	0.0452	0.0551	0.045	0.0256			0.0396	0.0399	0.0418	0.0357	0.0323	0.0399	0.0358	0.0349
17.6	0.07644	0.08206	0.08045	0.06735	0.04683	0.05058	0.04453	0.02236		17.6	0.0767	0.0917	0.0793	0.0578	0.0444	0.0532	0.0468	0.0204		0.0745	0.086	0.0761	0.0598	0.0454	0.0537	0.0459	0.0235		0.07	0.0825	0.0761	0.0614	0.046	0.0552	0.0455	0.0259			0.0393	0.0396	0.0416	0.0355	0.0322	0.0397	0.0357	0.0348
17.8	0.07539	0.08211	0.07425	0.06775	0.04773	0.05263	0.04663	0.02091		17.8	0.0772	0.0911	0.0795	0.0554	0.0447	0.0519	0.0474	0.0214		0.0741	0.0864	0.0761	0.0598	0.0463	0.0531	0.0464	0.0241		0.0698	0.0804	0.0758	0.0614	0.0464	0.055	0.0461	0.0262			0.0391	0.0393	0.0414	0.0353	0.032	0.0395	0.0356	0.0347
18	0.07459	0.07896	0.0725	0.0722	0.04173	0.05813	0.04513	0.01526		18	0.0762	0.0904	0.0789	0.0548	0.0464	0.05	0.0467	0.0254		0.074	0.0856	0.0771	0.0591	0.0464	0.0522	0.0468	0.024		0.0693	0.079	0.0755	0.061	0.0464	0.0549	0.0461	0.0264			0.0388	0.039	0.0411	0.0351	0.0318	0.0393	0.0354	0.0345
18.2	0.07589	0.07516	0.0737	0.06995	0.04483	0.06038	0.04253	0.01886		18.2	0.077	0.0895	0.0782	0.055	0.05	0.0488	0.0457	0.0229		0.074	0.0851	0.0781	0.0585	0.0462	0.0516	0.0465	0.0239		0.0691	0.0777	0.0747	0.0607	0.0462	0.0547	0.0463	0.0264			0.0384	0.0387	0.0408	0.0348	0.0316	0.0391	0.0352	0.0343
18.4	0.07639	0.07616	0.07315	0.06665	0.04868	0.05143	0.04403	0.01781		18.4	0.0766	0.0891	0.0767	0.0574	0.0518	0.0492	0.0464	0.0219		0.073	0.0854	0.077	0.0586	0.0461	0.0521	0.0463	0.0241		0.0685	0.0769	0.0738	0.0603	0.0458	0.0547	0.0461	0.0263			0.0381	0.0383	0.0405	0.0345	0.0313	0.0388	0.0349	0.0341
18.6	0.07719	0.07821	0.0766	0.0661	0.04678	0.05363	0.05088	0.01821		18.6	0.0765	0.0887	0.076	0.0611	0.0505	0.0505	0.0472	0.0223		0.073	0.0851	0.0761	0.0593	0.0459	0.0529	0.0467	0.0243		0.0677	0.0758	0.0732	0.0599	0.0455	0.0541	0.046	0.0264			0.0377	0.0379	0.0401	0.0342	0.031	0.0385	0.0347	0.0339
18.8	0.07559	0.07751	0.07355	0.0696	0.04058	0.05628	0.04728	0.02026		18.8	0.0753	0.0883	0.0759	0.0622	0.0476	0.0529	0.048	0.0224		0.0727	0.0844	0.0764	0.06	0.0457	0.0532	0.047	0.0242		0.0667	0.0748	0.0724	0.0594	0.0453	0.054	0.0457	0.0265			0.0373	0.0375	0.0398	0.0339	0.0307	0.0382	0.0344	0.0336
19	0.07604	0.07886	0.075	0.066	0.04123	0.05663	0.04368	0.01861		19	0.0746	0.0876	0.0763	0.0609	0.0456	0.0535	0.0484	0.0236		0.0719	0.0825	0.076	0.0604	0.0458	0.0533	0.0475	0.0246		0.0658	0.0734	0.0719	0.059	0.0452	0.0537	0.0454	0.0266			0.0369	0.0371	0.0394	0.0336	0.0304	0.0379	0.0341	0.0333
19.2	0.07449	0.07701	0.07315	0.0656	0.04068	0.05543	0.04853	0.01326		19.2	0.0742	0.0864	0.0762	0.0591	0.0447	0.0529	0.0478	0.0215		0.0713	0.0803	0.0751	0.0605	0.0462	0.0531	0.0473	0.0246		0.0652	0.0723	0.0713	0.0586	0.0449	0.0532	0.0452	0.0265			0.0365	0.0367	0.039	0.0332	0.0301	0.0376	0.0337	0.033
19.4	0.07524	0.08196	0.06975	0.06485	0.04548	0.04843	0.04173	0.01371		19.4	0.0726	0.0849	0.076	0.057	0.0451	0.0504	0.0475	0.021		0.0705	0.0786	0.0742	0.0603	0.0466	0.0528	0.0468	0.0247		0.0644	0.071	0.0704	0.058	0.0444	0.0529	0.0451	0.0265			0.0361	0.0363	0.0386	0.0328	0.0297	0.0372	0.0334	0.0327
19.6	0.07454	0.08271	0.0712	0.07045	0.04978	0.04818	0.04498	0.01971		19.6	0.0721	0.0841	0.0751	0.0554	0.0466	0.0482	0.0468	0.0222		0.07	0.0773	0.0734	0.0595	0.0463	0.0523	0.0466	0.0245		0.0639	0.0695	0.0696	0.0573	0.0438	0.0524	0.0449	0.0264			0.0357	0.0359	0.0382	0.0325	0.0294	0.0369	0.0331	0.0324
19.8	0.07154	0.07421	0.07345	0.0698	0.04628	0.05408	0.04433	0.02181		19.8	0.0725	0.0825	0.0737	0.0552	0.0487	0.0473	0.0465	0.0234		0.0689	0.0763	0.0731	0.0584	0.0455	0.0515	0.0462	0.0244		0.0634	0.0689	0.0688	0.0566	0.0433	0.0519	0.0447	0.0263			0.0353	0.0355	0.0379	0.0321	0.029	0.0365	0.0327	0.0321
20	0.07534	0.07441	0.0734	0.0655	0.04163	0.05608	0.04308	0.01561		20	0.072	0.0808	0.073	0.0563	0.0491	0.0478	0.0455	0.0248		0.0678	0.0757	0.0723	0.0575	0.0448	0.0512	0.046	0.0243		0.0634	0.0686	0.0681	0.0559	0.0428	0.0515	0.0442	0.0261			0.0349	0.0351	0.0375	0.0318	0.0286	0.0361	0.0324	0.0317
20.2	0.07239	0.07361	0.0747	0.0646	0.04013	0.05683	0.04483	0.01146		20.2	0.0712	0.0805	0.0724	0.057	0.0473	0.0503	0.0447	0.021		0.0675	0.074	0.0715	0.0573	0.0442	0.0512	0.046	0.0243		0.0634	0.068	0.0679	0.055	0.0421	0.0508	0.0438	0.026			0.0345	0.0348	0.0371	0.0314	0.0283	0.0358	0.032	0.0314
20.4	0.07379	0.06721	0.0711	0.05895	0.04153	0.05318	0.04933	0.01681		20.4	0.0707	0.0798	0.0722	0.0574	0.0451	0.0525	0.0444	0.0194		0.0667	0.0724	0.0704	0.0572	0.0437	0.0514	0.0457	0.0241		0.0631	0.0669	0.0677	0.0543	0.0415	0.0502	0.0433	0.0257			0.0341	0.0344	0.0368	0.031	0.028	0.0355	0.0317	0.031
20.6	0.07119	0.07326	0.06915	0.0593	0.04378	0.05418	0.05028	0.02081		20.6	0.0704	0.0789	0.0724	0.0567	0.0444	0.0525	0.0453	0.0207		0.0652	0.071	0.0691	0.0568	0.043	0.0519	0.0456	0.0241		0.0626	0.0656	0.0673	0.0539	0.041	0.05	0.0427	0.0254			0.0338	0.034	0.0364	0.0307	0.0276	0.0351	0.0314	0.0307
20.8	0.06954	0.06861	0.067	0.06415	0.04213	0.04708	0.04323	0.02661		20.8	0.0693	0.0789	0.0721	0.056	0.0453	0.0511	0.0461	0.0224		0.0644	0.0694	0.0682	0.0563	0.0426	0.0515	0.0455	0.0238		0.0617	0.0647	0.0665	0.0537	0.0408	0.0499	0.0424	0.0253			0.0334	0.0337	0.0361	0.0304	0.0273	0.0348	0.031	0.0304
21	0.07104	0.06891	0.0694	0.0638	0.03858	0.04653	0.04183	0.01881		21	0.0686	0.0787	0.0716	0.0559	0.0465	0.0493	0.0463	0.0245		0.0632	0.0676	0.0673	0.0557	0.0426	0.0505	0.045	0.0241		0.0609	0.0638	0.0658	0.0534	0.0405	0.0495	0.0421	0.0251			0.0331	0.0334	0.0358	0.03	0.027	0.0345	0.0307	0.0301
21.2	0.06999	0.07491	0.0691	0.0642	0.03958	0.05513	0.03598	0.01566		21.2	0.0682	0.079	0.0712	0.0558	0.0467	0.0488	0.0458	0.0212		0.0621	0.0668	0.066	0.055	0.0427	0.0493	0.0447	0.0242		0.06	0.0628	0.0651	0.0528	0.0402	0.0487	0.0418	0.0251			0.0328	0.0331	0.0354	0.0297	0.0267	0.0342	0.0304	0.0297
21.4	0.07214	0.07586	0.07055	0.06075	0.03943	0.05383	0.04308	0.01196		21.4	0.0685	0.0785	0.0701	0.056	0.0461	0.049	0.0455	0.0191		0.0606	0.0668	0.0648	0.0542	0.0425	0.0483	0.0443	0.0242		0.0595	0.0617	0.0645	0.0521	0.0397	0.0481	0.0415	0.0249			0.0325	0.0328	0.0351	0.0294	0.0264	0.0339	0.0301	0.0294
21.6	0.06904	0.07771	0.06605	0.06015	0.04333	0.05838	0.04688	0.02446		21.6	0.0686	0.0777	0.0692	0.0565	0.0449	0.0498	0.0464	0.0208		0.0605	0.0662	0.0645	0.0533	0.0418	0.0478	0.0437	0.0236		0.0595	0.0609	0.0637	0.0516	0.0393	0.0479	0.041	0.0248			0.0322	0.0325	0.0348	0.0291	0.0261	0.0336	0.0298	0.0291
21.8	0.07029	0.07616	0.06255	0.0651	0.04113	0.06003	0.03923	0.02151		21.8	0.0679	0.0778	0.0692	0.056	0.0436	0.0501	0.0469	0.0207		0.0604	0.0661	0.0644	0.0527	0.0409	0.0478	0.0432	0.0231		0.0592	0.0607	0.0629	0.0514	0.0391	0.0477	0.0408	0.0246			0.0319	0.0322	0.0346	0.0289	0.0258	0.0333	0.0295	0.0288
22	0.07089	0.07106	0.06435	0.0636	0.04313	0.05838	0.04068	0.01936		22	0.0668	0.078	0.0685	0.0546	0.0436	0.0498	0.0456	0.0218		0.0599	0.0656	0.0639	0.0524	0.0399	0.0478	0.0427	0.0231		0.0588	0.0615	0.0626	0.0512	0.0389	0.0473	0.0406	0.0244			0.0316	0.0319	0.0343	0.0286	0.0255	0.033	0.0293	0.0286
22.2	0.06834	0.07046	0.066	0.0598	0.04088	0.05353	0.04358	0.01711		22.2	0.0665	0.0773	0.0683	0.0532	0.0444	0.0488	0.044	0.0231		0.0597	0.0651	0.0631	0.0524	0.0391	0.0479	0.0422	0.023		0.0589	0.0622	0.0631	0.0508	0.0386	0.0471	0.0405	0.0244			0.0314	0.0317	0.034	0.0283	0.0253	0.0328	0.029	0.0283
22.4	0.06949	0.06626	0.0657	0.05925	0.04278	0.05308	0.04333	0.01441		22.4	0.066	0.0764	0.0678	0.0526	0.0452	0.0479	0.0432	0.0209		0.0593	0.0646	0.0626	0.0522	0.0385	0.0476	0.042	0.0229		0.0588	0.0619	0.0634	0.0505	0.0383	0.0469	0.0403	0.0243			0.0311	0.0314	0.0338	0.0281	0.025	0.0325	0.0288	0.028
22.6	0.07089	0.06746	0.06935	0.05665	0.03878	0.05078	0.04423	0.02361		22.6	0.0658	0.0755	0.0664	0.053	0.0455	0.0469	0.0434	0.0204		0.0586	0.0648	0.0627	0.0517	0.0382	0.0469	0.0414	0.0226		0.0585	0.0615	0.0631	0.0504	0.0382	0.047	0.0401	0.0241			0.0309	0.0312	0.0336	0.0278	0.0248	0.0323	0.0285	0.0278
22.8	0.06644	0.07401	0.0648	0.0571	0.04023	0.05058	0.04053	0.01746		22.8	0.0655	0.0746	0.0657	0.0536	0.0446	0.0464	0.0439	0.0212		0.0587	0.0649	0.0626	0.051	0.0381	0.0462	0.0411	0.0227		0.0582	0.0615	0.0627	0.0504	0.0381	0.0471	0.0399	0.0239			0.0307	0.031	0.0333	0.0276	0.0246	0.032	0.0283	0.0276
23	0.06524	0.07656	0.0654	0.05625	0.03798	0.05318	0.04303	0.01061		23	0.0648	0.0743	0.0654	0.0538	0.0431	0.0471	0.0438	0.0215		0.059	0.0649	0.0625	0.0507	0.0377	0.0457	0.0406	0.0224		0.058	0.0616	0.0626	0.0503	0.038	0.0471	0.0399	0.0237			0.0304	0.0308	0.0331	0.0274	0.0244	0.0318	0.0281	0.0273
23.2	0.06684	0.06801	0.0666	0.05545	0.03818	0.05503	0.04333	0.01031		23.2	0.0645	0.0742	0.0653	0.0543	0.0415	0.0486	0.0435	0.0221		0.0596	0.0658	0.0625	0.0506	0.0377	0.0456	0.0404	0.0224		0.0581	0.0616	0.0625	0.0501	0.0378	0.0468	0.0398	0.0236			0.0302	0.0306	0.0329	0.0272	0.0241	0.0316	0.0279	0.0271
23.4	0.06749	0.06561	0.0653	0.05875	0.03633	0.05293	0.04268	0.02256		23.4	0.0639	0.0736	0.0652	0.0552	0.0408	0.05	0.0433	0.0203		0.0598	0.0687	0.0626	0.0506	0.0376	0.0454	0.0402	0.0221		0.0587	0.0626	0.0622	0.05	0.0377	0.0465	0.0397	0.0236			0.03	0.0304	0.0327	0.027	0.024	0.0314	0.0277	0.0269
23.6	0.06504	0.07021	0.06115	0.0582	0.03853	0.05563	0.04208	0.02041		23.6	0.0637	0.0732	0.0651	0.0548	0.0409	0.0499	0.0433	0.0186		0.0612	0.0718	0.0641	0.0506	0.0375	0.0451	0.0401	0.0224		0.0597	0.0639	0.0623	0.05	0.0378	0.0465	0.0396	0.0235			0.0299	0.0302	0.0325	0.0268	0.0238	0.0312	0.0275	0.0267
23.8	0.06874	0.07411	0.06305	0.0586	0.04158	0.05278	0.04243	0.01661		23.8	0.0631	0.0729	0.0643	0.0539	0.0419	0.0488	0.0434	0.0206		0.0628	0.0736	0.0669	0.0508	0.0373	0.0449	0.0401	0.0223		0.0604	0.0645	0.0632	0.0503	0.0379	0.0466	0.0395	0.0234			0.0297	0.03	0.0323	0.0266	0.0236	0.031	0.0273	0.0265
24	0.06689	0.06471	0.06545	0.05555	0.04188	0.05123	0.03843	0.00986		24	0.0625	0.0726	0.0633	0.0527	0.043	0.0475	0.0435	0.0226		0.064	0.0734	0.0697	0.0512	0.0372	0.0449	0.0397	0.022		0.0604	0.0645	0.0642	0.0507	0.038	0.0467	0.0395	0.0234			0.0295	0.0299	0.0322	0.0264	0.0234	0.0308	0.0271	0.0263
24.2	0.06409	0.06531	0.06645	0.0547	0.03703	0.04948	0.04063	0.01856		24.2	0.0621	0.072	0.0629	0.0515	0.0438	0.0464	0.0433	0.0233		0.0649	0.0719	0.0702	0.0522	0.0374	0.0459	0.0393	0.0219		0.0599	0.064	0.0647	0.0511	0.0381	0.0472	0.0396	0.0235			0.0294	0.0297	0.032	0.0263	0.0232	0.0307	0.0269	0.0261
24.4	0.06729	0.06831	0.06305	0.06185	0.03923	0.04773	0.04248	0.02091		24.4	0.0619	0.0708	0.0624	0.0504	0.0439	0.0462	0.0435	0.022		0.0653	0.0703	0.0696	0.0535	0.038	0.0471	0.0396	0.0218		0.0589	0.0633	0.0643	0.0515	0.0383	0.0478	0.0398	0.0235			0.0292	0.0296	0.0319	0.0261	0.0231	0.0305	0.0268	0.026
[truncated: 179 more rows]
