# Supplementary material for: Application of different building representation techniques in HEC-RAS 2-D for urban flood modeling using the Toce River experimental case
Source: PeerJ. 2021 Jul 2;9:e11667. doi: 10.7717/peerj.11667 (PMC8256810; doi:10.7717/peerj.11667)
Supplement: Supplemental Information 6 [file peerj-09-11667-s006.xlsx]

## Sheet: 2A_BB_&_BR
t	S3	S4	S5	S6	S7	S8	S9	S10		time	HEC_P3	HEC_P4	HEC_P5	HEC_P6	HEC_P7	HEC_P8	HEC_P9	HEC_P10		HEC_2A_2_P3	HEC_2A_2_P4	HEC_2A_2_P5	HEC_2A_2_P6	HEC_2A_2_P7	HEC_2A_2_P8	HEC_2A_2_P9	HEC_2A_2_P10		HEC_2A_5_P3	HEC_2A_5_P4	HEC_2A_5_P5	HEC_2A_5_P6	HEC_2A_5_P7	HEC_2A_5_P8	HEC_2A_5_P9	HEC_2A_5_P10		HEC_Dif_P3	HEC_Dif_P4	HEC_Dif_P5	HEC_Dif_P6	HEC_Dif_P7	HEC_Dif_P8	HEC_Dif_P9	HEC_Dif_P10			HEC_BR_10_P3	HEC_BR_10_P4
0	-3.71429e-05	-7.42857e-05	-0.000128571	7.71429e-05	1.42857e-06	5.14286e-05	-0.00011	2.28571e-05		0	0	0	0	0	0	0	0	0		0	0	0	0	0	0	0	0		0	0	0	0	0	0	0	0		0	0	0	0	0	0	0	0			0	0
0.2	-8.71429e-05	-2.42857e-05	-7.85714e-05	-0.000122857	0.000301429	1.42857e-06	-0.00021	7.28571e-05		0.2	0	0	0	0	0	0	0	0		0	0	0	0	0	0	0	0		0	0	0	0	0	0	0	0		0	0	0	0	0	0	0	0			0	0
0.4	6.28571e-05	-2.42857e-05	7.14286e-05	2.71429e-05	-0.000148571	1.42857e-06	0.00019	-7.71429e-05		0.4	0	0	0	0	0	0	0	0		0	0	0	0	0	0	0	0		0	0	0	0	0	0	0	0		0	0	0	0	0	0	0	0			0	0
0.6	-3.71429e-05	0.000275714	2.14286e-05	-2.28571e-05	0.000101429	-4.85714e-05	9e-05	0.000122857		0.6	0	0	0	0	0	0	0	0		0	0	0	0	0	0	0	0		0	0	0	0	0	0	0	0		0	0	0	0	0	0	0	0			0	0
0.8	6.28571e-05	7.57143e-05	-7.85714e-05	-7.28571e-05	1.42857e-06	-0.000148571	-1e-05	2.28571e-05		0.8	0	0	0	0	0	0	0	0		0	0	0	0	0	0	0	0		0	0	0	0	0	0	0	0		0	0	0	0	0	0	0	0			0	0
1	-3.71429e-05	-0.000124286	-0.000178571	-2.28571e-05	1.42857e-06	-9.85714e-05	-1e-05	2.28571e-05		1	0	0	0	0	0	0	0	0		0	0	0	0	0	0	0	0		0	0	0	0	0	0	0	0		0	0	0	0	0	0	0	0			0	0
1.2	-3.71429e-05	0.000125714	7.14286e-05	-7.28571e-05	1.42857e-06	1.42857e-06	-6e-05	-2.71429e-05		1.2	0	0	0	0	0	0	0	0		0	0	0	0	0	0	0	0		0	0	0	0	0	0	0	0		0	0	0	0	0	0	0	0			0	0
1.4	6.28571e-05	2.57143e-05	0.000121429	2.71429e-05	5.14286e-05	0.000251429	-0.00026	0.000222857		1.4	0	0	0	0	0	0	0	0		0	0	0	0	0	0	0	0		0	0	0	0	0	0	0	0		0	0	0	0	0	0	0	0			0	0
1.6	-3.71429e-05	7.57143e-05	-7.85714e-05	2.71429e-05	5.14286e-05	-0.000148571	0.00024	-7.71429e-05		1.6	0	0	0	0	0	0	0	0		0	0	0	0	0	0	0	0		0	0	0	0	0	0	0	0		0	0	0	0	0	0	0	0			0	0
1.8	1.28571e-05	2.57143e-05	-2.85714e-05	2.71429e-05	-0.000248571	1.42857e-06	4e-05	-7.71429e-05		1.8	0	0	0	0	0	0	0	0		0	0	0	0	0	0	0	0		0	0	0	0	0	0	0	0		0	0	0	0	0	0	0	0			0	0
2	6.28571e-05	2.57143e-05	-7.85714e-05	0.000327143	1.42857e-06	0.000151429	-0.00016	-0.000127143		2	0	0	0	0	0	0	0	0		0	0	0	0	0	0	0	0		0	0	0	0	0	0	0	0		0	0	0	0	0	0	0	0			0	0
2.2	-8.71429e-05	-0.000124286	2.14286e-05	2.71429e-05	5.14286e-05	-0.000248571	-0.00011	0.000172857		2.2	0	0	0	0	0	0	0	0		0	0	0	0	0	0	0	0		0	0	0	0	0	0	0	0		0	0	0	0	0	0	0	0			0	0
2.4	1.28571e-05	-2.42857e-05	0.000121429	-2.28571e-05	0.000201429	0.000251429	-0.00011	-7.71429e-05		2.4	0	0	0	0	0	0	0	0		0	0	0	0	0	0	0	0		0	0	0	0	0	0	0	0		0	0	0	0	0	0	0	0			0	0
2.6	1.28571e-05	7.57143e-05	-2.85714e-05	0.000327143	-0.000148571	0.000201429	-0.00021	-7.71429e-05		2.6	0	0	0	0	0	0	0	0		0	0	0	0	0	0	0	0		0	0	0	0	0	0	0	0		0	0	0	0	0	0	0	0			0	0
2.8	6.28571e-05	7.57143e-05	2.14286e-05	-7.28571e-05	-0.000148571	-0.000148571	0.00019	-2.71429e-05		2.8	0	0	0	0	0	0	0	0		0	0	0	0	0	0	0	0		0	0	0	0	0	0	0	0		0	0	0	0	0	0	0	0			0	0
3	0.000162857	-0.000124286	-2.85714e-05	-0.000122857	1.42857e-06	-4.85714e-05	0.00014	-2.71429e-05		3	0	0	0	0	0	0	0	0		0	0	0	0	0	0	0	0		0	0	0	0	0	0	0	0		0	0	0	0	0	0	0	0			0	0
3.2	-8.71429e-05	0.000225714	2.14286e-05	7.71429e-05	0.000151429	1.42857e-06	4e-05	-7.71429e-05		3.2	0	0	0	0	0	0	0	0		0	0	0	0	0	0	0	0		0	0	0	0	0	0	0	0		0	0	0	0	0	0	0	0			0	0
3.4	-8.71429e-05	-2.42857e-05	-7.85714e-05	-2.28571e-05	-9.85714e-05	-9.85714e-05	0.00019	-2.71429e-05		3.4	0	0	0	0	0	0	0	0		0	0	0	0	0	0	0	0		0	0	0	0	0	0	0	0		0	0	0	0	0	0	0	0			0	0
3.6	-8.71429e-05	2.57143e-05	-7.85714e-05	-0.000172857	-4.85714e-05	5.14286e-05	-1e-05	0.000172857		3.6	0	0	0	0	0	0	0	0		0	0	0	0	0	0	0	0		0	0	0	0	0	0	0	0		0	0	0	0	0	0	0	0			0	0
3.8	1.28571e-05	-7.42857e-05	2.14286e-05	0.000127143	5.14286e-05	-4.85714e-05	-0.00011	-2.71429e-05		3.8	0	0	0	0	0	0	0	0		0	0	0	0	0	0	0	0		0	0	0	0	0	0	0	0		0	0	0	0	0	0	0	0			0	0
4	0.000312857	7.57143e-05	0.000271429	-7.28571e-05	-9.85714e-05	-0.000248571	9e-05	-2.71429e-05		4	0	0	0	0	0	0	0	0		0	0	0	0	0	0	0	0		0	0	0	0	0	0	0	0		0	0	0	0	0	0	0	0			0	0
4.2	-8.71429e-05	7.57143e-05	2.14286e-05	-7.28571e-05	-4.85714e-05	-9.85714e-05	0.00014	-0.000127143		4.2	0	0	0	0	0	0	0	0		0	0	0	0	0	0	0	0		0	0	0	0	0	0	0	0		0	0	0	0	0	0	0	0			0	0
4.4	-3.71429e-05	-0.000174286	2.14286e-05	-2.28571e-05	-4.85714e-05	-4.85714e-05	-1e-05	0.000122857		4.4	0	0	0	0	0	0	0	0		0	0	0	0	0	0	0	0		0	0	0	0	0	0	0	0		0	0	0	0	0	0	0	0			0	0
4.6	-8.71429e-05	2.57143e-05	-7.85714e-05	-2.28571e-05	1.42857e-06	-4.85714e-05	-1e-05	-2.71429e-05		4.6	0	0	0	0	0	0	0	0		0	0	0	0	0	0	0	0		0	0	0	0	0	0	0	0		0	0	0	0	0	0	0	0			0	0
4.8	1.28571e-05	-2.42857e-05	-2.85714e-05	-0.000222857	-0.000148571	-4.85714e-05	9e-05	-7.71429e-05		4.8	0	0	0	0	0	0	0	0		0	0	0	0	0	0	0	0		0	0	0	0	0	0	0	0		0	0	0	0	0	0	0	0			0	0
5	0.000412857	-2.42857e-05	0.000121429	7.71429e-05	1.42857e-06	5.14286e-05	-6e-05	-0.000177143		5	0	0	0	0	0	0	0	0		0	0	0	0	0	0	0	0		0	0	0	0	0	0	0	0		0	0	0	0	0	0	0	0			0	0
5.2	-0.000137143	7.57143e-05	-0.000128571	2.71429e-05	1.42857e-06	0.000201429	-6e-05	7.28571e-05		5.2	0	0	0	0	0	0	0	0		0	0	0	0	0	0	0	0		0	0	0	0	0	0	0	0		0	0	0	0	0	0	0	0			0	0
5.4	-3.71429e-05	-7.42857e-05	-2.85714e-05	-0.000122857	0.000351429	-9.85714e-05	0.00014	2.28571e-05		5.4	0	0	0	0	0	0	0	0		0	0	0	0	0	0	0	0		0	0	0	0	0	0	0	0		0	0	0	0	0	0	0	0			0	0
5.6	-8.71429e-05	-0.000124286	-7.85714e-05	2.71429e-05	-0.000198571	1.42857e-06	4e-05	-0.000127143		5.6	0	0	0	0	0	0	0	0		0	0	0	0	0	0	0	0		0	0	0	0	0	0	0	0		0	0	0	0	0	0	0	0			0	0
5.8	-3.71429e-05	-0.000124286	-2.85714e-05	2.71429e-05	5.14286e-05	0.000301429	-6e-05	0.000272857		5.8	0	0	0	0	0	0	0	0		0	0	0	0	0	0	0	0		0	0	0	0	0	0	0	0		0	0	0	0	0	0	0	0			0	0
6	0.000162857	2.57143e-05	0.000121429	0.000177143	1.42857e-06	1.42857e-06	4e-05	7.28571e-05		6	0	0	0	0	0	0	0	0		0	0	0	0	0	0	0	0		0	0	0	0	0	0	0	0		0	0	0	0	0	0	0	0			0	0
6.2	-0.000187143	7.57143e-05	-0.000128571	-2.28571e-05	1.42857e-06	1.42857e-06	-0.00011	2.28571e-05		6.2	0	0	0	0	0	0	0	0		0	0	0	0	0	0	0	0		0	0	0	0	0	0	0	0		0	0	0	0	0	0	0	0			0	0
6.4	-8.71429e-05	-0.000174286	2.14286e-05	-0.000172857	-9.85714e-05	0.000151429	-0.00016	-0.000227143		6.4	0	0	0	0	0	0	0	0		0	0	0	0	0	0	0	0		0	0	0	0	0	0	0	0		0	0	0	0	0	0	0	0			0	0
6.6	-3.71429e-05	2.57143e-05	0.000421429	7.71429e-05	1.42857e-06	-0.000148571	0.00014	0.000122857		6.6	0	0	0	0	0	0	0	0		0	0	0	0	0	0	0	0		0	0	0	0	0	0	0	0		0	0	0	0	0	0	0	0			0	0
6.8	1.28571e-05	-7.42857e-05	-0.000128571	-2.28571e-05	0.000101429	0.000101429	4e-05	-2.71429e-05		6.8	0	0	0	0	0	0	0	0		0	0	0	0	0	0	0	0		0	0	0	0	0	0	0	0		0	0	0	0	0	0	0	0			0	0
7	0.000112857	-0.000124286	-2.85714e-05	-0.000122857	-0.000198571	0.000101429	9e-05	-7.71429e-05		7	0	0	0	0	0	0	0	0		0	0	0	0	0	0	0	0		0	0	0	0	0	0	0	0		0	0	0	0	0	0	0	0			0	0
7.2	-0.000187143	7.57143e-05	-0.000178571	0.000127143	-4.85714e-05	-0.000148571	-1e-05	-0.000227143		7.2	0	0	0	0	0	0	0	0		0	0	0	0	0	0	0	0		0	0	0	0	0	0	0	0		0	0	0	0	0	0	0	0			0	0
7.4	-8.71429e-05	-0.000124286	-2.85714e-05	-7.28571e-05	1.42857e-06	5.14286e-05	-0.00011	7.28571e-05		7.4	0	0	0	0	0	0	0	0		0	0	0	0	0	0	0	0		0	0	0	0	0	0	0	0		0	0	0	0	0	0	0	0			0	0
7.6	-3.71429e-05	-7.42857e-05	0.000121429	-0.000172857	5.14286e-05	0.000201429	-0.00011	-0.000127143		7.6	0	0	0	0	0	0	0	0		0	0	0	0	0	0	0	0		0	0	0	0	0	0	0	0		0	0	0	0	0	0	0	0			0	0
7.8	1.28571e-05	-0.000224286	-2.85714e-05	-2.28571e-05	-0.000148571	-4.85714e-05	9e-05	-7.71429e-05		7.8	0	0	0	0	0	0	0	0		0	0	0	0	0	0	0	0		0	0	0	0	0	0	0	0		0	0	0	0	0	0	0	0			0	0
8	0.000162857	2.57143e-05	2.14286e-05	2.71429e-05	1.42857e-06	5.14286e-05	-1e-05	-7.71429e-05		8	0	0	0	0	0	0	0	0		0	0	0	0	0	0	0	0		0	0	0	0	0	0	0	0		0	0	0	0	0	0	0	0			0	0
8.2	-0.000187143	-2.42857e-05	-7.85714e-05	-0.000122857	1.42857e-06	5.14286e-05	-6e-05	7.28571e-05		8.2	0	0	0	0	0	0	0	0		0	0	0	0	0	0	0	0		0	0	0	0	0	0	0	0		0	0	0	0	0	0	0	0			0	0
8.4	-3.71429e-05	-0.000174286	2.14286e-05	7.71429e-05	0.000251429	-0.000148571	-1e-05	-0.000127143		8.4	0	0	0	0	0	0	0	0		0	0	0	0	0	0	0	0		0	0	0	0	0	0	0	0		0	0	0	0	0	0	0	0			0	0
8.6	1.28571e-05	-2.42857e-05	7.14286e-05	-0.000122857	-0.000148571	0.000151429	-0.00011	-0.000127143		8.6	0	0	0	0	0	0	0	0		0	0	0	0	0	0	0	0		0	0	0	0	0	0	0	0		0	0	0	0	0	0	0	0			0	0
8.8	-3.71429e-05	-0.000124286	-0.000128571	-0.000222857	5.14286e-05	5.14286e-05	-0.00016	0.000172857		8.8	0	0	0	0	0	0	0	0		0	0	0	0	0	0	0	0		0	0	0	0	0	0	0	0		0	0	0	0	0	0	0	0			0	0
9	0.000112857	-0.000124286	-0.000128571	2.71429e-05	5.14286e-05	5.14286e-05	0.00014	-2.71429e-05		9	0	0	0	0	0	0	0	0		0	0	0	0	0	0	0	0		0	0	0	0	0	0	0	0		0	0	0	0	0	0	0	0			0	0
9.2	-0.000187143	0.000225714	0.000221429	2.71429e-05	-4.85714e-05	5.14286e-05	-1e-05	-7.71429e-05		9.2	0	0	0	0	0	0	0	0		0	0	0	0	0	0	0	0		0	0	0	0	0	0	0	0		0	0	0	0	0	0	0	0			0	0
9.4	-0.000137143	-7.42857e-05	-7.85714e-05	-0.000172857	-9.85714e-05	0.000101429	-6e-05	-0.000177143		9.4	0	0	0	0	0	0	0	0		0	0	0	0	0	0	0	0		0	0	0	0	0	0	0	0		0	0	0	0	0	0	0	0			0	0
9.6	-3.71429e-05	-7.42857e-05	7.14286e-05	-7.28571e-05	-4.85714e-05	0.000401429	4e-05	0.000122857		9.6	0	0	0	0	0	0	0	0		0	0	0	0	0	0	0	0		0	0	0	0	0	0	0	0		0	0	0	0	0	0	0	0			0	0
9.8	1.28571e-05	-0.000274286	-0.000228571	-0.000172857	5.14286e-05	1.42857e-06	-0.00011	-7.71429e-05		9.8	0	0	0	0	0	0	0	0		0	0	0	0	0	0	0	0		0	0	0	0	0	0	0	0		0	0	0	0	0	0	0	0			0	0
10	0.000112857	-2.42857e-05	2.14286e-05	-7.28571e-05	-0.000148571	5.14286e-05	-0.00016	-7.71429e-05		10	0	0	0	0	0	0	0	0		0	0	0	0	0	0	0	0		0	0	0	0	0	0	0	0		0	0	0	0	0	0	0	0			0	0
10.2	-0.000187143	-0.000174286	0.000121429	-7.28571e-05	-9.85714e-05	0.000201429	0.00029	-0.000177143		10.2	0	0	0	0	0	0	0	0		0	0	0	0	0	0	0	0		0	0	0	0	0	0	0	0		0	0	0	0	0	0	0	0			0	0
10.4	-8.71429e-05	-0.000224286	-2.85714e-05	-7.28571e-05	1.42857e-06	-0.000148571	4e-05	7.28571e-05		10.4	0	0	0	0	0	0	0	0		0	0	0	0	0	0	0	0		0	0	0	0	0	0	0	0		0	0	0	0	0	0	0	0			0	0
10.6	-0.000187143	-2.42857e-05	2.14286e-05	0.000277143	5.14286e-05	5.14286e-05	-6e-05	-2.71429e-05		10.6	0	0	0	0	0	0	0	0		0	0	0	0	0	0	0	0		0	0	0	0	0	0	0	0		0	0	0	0	0	0	0	0			0	0
10.8	-8.71429e-05	-0.000174286	-7.85714e-05	-7.28571e-05	-0.000148571	5.14286e-05	-0.00011	-7.71429e-05		10.8	0	0	0	0	0	0	0	0		0	0	0	0	0	0	0	0		0	0	0	0	0	0	0	0		0	0	0	0	0	0	0	0			0	0
11	6.28571e-05	-0.000174286	2.14286e-05	-0.000172857	-0.000148571	-9.85714e-05	-0.00011	0.000172857		11	0	0	0	0	0	0	0	0		0	0	0	0	0	0	0	0		0	0	0	0	0	0	0	0		0	0	0	0	0	0	0	0			0	0
11.2	-0.000187143	2.57143e-05	2.14286e-05	7.71429e-05	-4.85714e-05	0.000151429	-0.00021	-2.71429e-05		11.2	0	0	0	0	0	0	0	0		0	0	0	0	0	0	0	0		0	0	0	0	0	0	0	0		0	0	0	0	0	0	0	0			0	0
11.4	-0.000137143	-0.000124286	-0.000128571	-2.28571e-05	0.000201429	0.000201429	9e-05	-2.71429e-05		11.4	0	0	0	0	0	0	0	0		0	0	0	0	0	0	0	0		0	0	0	0	0	0	0	0		0	0.0116	0	0	0	0	0	0			0	0
11.6	-3.71429e-05	-7.42857e-05	2.14286e-05	-2.28571e-05	-0.000148571	-0.000198571	4e-05	-0.000127143		11.6	0	0	0	0	0	0	0	0		0	0	0	0	0	0	0	0		0	0	0	0	0	0	0	0		0.0115	0.0203	0	0	0	0	0	0			0	0
11.8	-8.71429e-05	-0.000174286	0.000171429	0.000127143	5.14286e-05	-4.85714e-05	-6e-05	7.28571e-05		11.8	0	0	0	0	0	0	0	0		0	0	0	0	0	0	0	0		0	0	0	0	0	0	0	0		0.0204	0.0249	0.0127	0	0	0	0	0			0	0
12	0.00181286	0.0145757	-2.85714e-05	-0.000122857	1.42857e-06	0.000101429	-1e-05	-7.71429e-05		12	0	0	0	0	0	0	0	0		0	0.0204	0	0	0	0	0	0		0	0.0432	0	0	0	0	0	0		0.0256	0.0283	0.0206	0	0	0	0	0			0	0.0204
12.2	0.0119629	0.0149757	2.14286e-05	-0.000172857	-4.85714e-05	-4.85714e-05	-6e-05	-2.71429e-05		12.2	0	0.0302	0	0	0	0	0	0		0	0.0367	0	0	0	0	0	0		0.0247	0.0677	0	0	0	0	0	0		0.029	0.0309	0.0262	0.0029	0	0	0	0			0	0.0369
12.4	0.0120129	0.0183757	0.0126714	2.71429e-05	-9.85714e-05	1.42857e-06	-0.00016	-0.000127143		12.4	0.0331	0.0775	0	0	0	0	0	0		0.036	0.0736	0	0	0	0	0	0		0.0433	0.0806	0.0302	0	0	0	0	0		0.0316	0.0331	0.0299	0.0111	0	0.0144	0	0			0.036	0.0867
12.6	0.0138129	0.0233257	0.0212714	-2.28571e-05	1.42857e-06	1.42857e-06	-0.00011	0.000172857		12.6	0.0331	0.0824	0.0423	0	0	0	0	0		0.0461	0.0851	0.042	0	0	0	0	0		0.0569	0.0921	0.0451	0	0	0	0	0		0.0337	0.0349	0.0326	0.018	0.007	0.0217	0.0038	0			0.0422	0.0783
12.8	0.0157129	0.0307757	0.0209714	0.000477143	1.42857e-06	-0.000148571	-1e-05	-2.71429e-05		12.8	0.0585	0.0768	0.0336	0	0	0	0	0		0.0619	0.0762	0.0341	0	0	0	0	0		0.0678	0.0918	0.0464	0	0	0	0	0		0.0353	0.0364	0.0348	0.0223	0.015	0.0261	0.0136	0			0.0631	0.0776
13	0.0180129	0.0427757	0.0203214	0.00172714	0.00270143	0.0158514	-6e-05	-7.71429e-05		13	0.0631	0.0775	0.0328	0	0	0	0	0		0.0672	0.076	0.0344	0	0	0	0	0		0.0775	0.0888	0.0461	0.0223	0	0.0056	0	0		0.0367	0.0376	0.0366	0.0255	0.0194	0.0295	0.0207	0			0.0651	0.0767
13.2	0.0205129	0.0415257	0.0204214	0.00387714	0.0107014	0.0179514	-1e-05	-0.000227143		13.2	0.0695	0.0834	0.0353	0.0158	0	0	0	0		0.0713	0.0809	0.0356	0.0157	0	0	0	0		0.0777	0.0863	0.0513	0.0198	0	0.0473	0	0		0.0378	0.0387	0.038	0.0278	0.0223	0.032	0.0246	0.0094			0.0712	0.0822
13.4	0.0219629	0.0423757	0.0232214	0.0100771	0.00880143	0.0181514	0.00174	2.28571e-05		13.4	0.0713	0.0863	0.0394	0.0061	0	0.0389	0	0		0.0703	0.085	0.0423	0.0096	0	0.039	0	0		0.0745	0.0863	0.0568	0.0375	0.0329	0.0484	0.0127	0		0.0387	0.0395	0.0392	0.0296	0.0245	0.0339	0.0273	0.0174			0.0719	0.085
13.6	0.0294129	0.0411257	0.0261214	0.0127771	0.0109514	0.0198514	0.00724	-7.71429e-05		13.6	0.0737	0.0883	0.0479	0.035	0.0303	0.0385	0	0		0.0715	0.0878	0.0505	0.0339	0.0316	0.0414	0.0121	0		0.0715	0.0866	0.0579	0.0433	0.0373	0.0496	0.0193	0		0.0394	0.0402	0.0402	0.031	0.0262	0.0354	0.0293	0.0209			0.0714	0.0878
13.8	0.0361129	0.0456257	0.0281214	0.0184771	0.0135514	0.0186514	0.01529	0.00312286		13.8	0.0759	0.088	0.0499	0.0351	0.027	0.0445	0.0079	0		0.0725	0.0903	0.0507	0.0378	0.0337	0.0514	0.01	0		0.0733	0.0879	0.0571	0.0445	0.0376	0.052	0.0345	0		0.04	0.0408	0.041	0.0322	0.0276	0.0366	0.0308	0.0234			0.0722	0.0893
14	0.0414129	0.0468757	0.0297714	0.0158271	0.0144014	0.0226514	0.01809	0.0134229		14	0.0788	0.0876	0.0467	0.0325	0.0314	0.0496	0.0073	0		0.0744	0.0921	0.0493	0.0363	0.034	0.0516	0.0244	0		0.075	0.0883	0.057	0.0442	0.0392	0.051	0.0413	0		0.0404	0.0411	0.0416	0.0331	0.0287	0.0376	0.0321	0.0254			0.0747	0.0907
14.2	0.0452629	0.0526257	0.0318714	0.0256771	0.0214014	0.0243014	0.02174	0.0151229		14.2	0.0795	0.0896	0.0463	0.0352	0.0357	0.0509	0.0323	0		0.0759	0.0914	0.0492	0.039	0.0389	0.0536	0.0331	0		0.0762	0.0885	0.0589	0.0439	0.041	0.0516	0.0429	0.0293		0.0408	0.0414	0.0421	0.0339	0.0297	0.0384	0.0332	0.0272			0.0764	0.0905
14.4	0.0578129	0.0596757	0.0333214	0.0330271	0.0226014	0.0263514	0.01599	0.0173729		14.4	0.08	0.0899	0.0477	0.0391	0.0427	0.0541	0.0349	0		0.078	0.0901	0.0506	0.0419	0.045	0.0554	0.0365	0.0286		0.076	0.0883	0.061	0.0467	0.0408	0.0526	0.0421	0.0271		0.0409	0.0416	0.0424	0.0345	0.0305	0.0391	0.0341	0.0288			0.0782	0.0895
14.6	0.0571129	0.0677257	0.0358214	0.0283271	0.0248514	0.0271514	0.01479	0.0209229		14.6	0.082	0.0893	0.0488	0.0403	0.0458	0.0555	0.0339	0.0236		0.0797	0.0897	0.0524	0.043	0.0441	0.0563	0.0373	0.0244		0.0785	0.0877	0.0619	0.0483	0.0421	0.0553	0.0425	0.0271		0.041	0.0416	0.0427	0.0351	0.0313	0.0397	0.0349	0.0304			0.0794	0.0891
14.8	0.0652129	0.0858257	0.0331214	0.0296271	0.0264014	0.0394014	0.01759	0.0237729		14.8	0.0826	0.0891	0.0497	0.042	0.0448	0.0558	0.0363	0.0262		0.0805	0.0894	0.0539	0.0441	0.0438	0.0573	0.0391	0.0239		0.0791	0.0871	0.0619	0.0486	0.0428	0.0565	0.0454	0.0268		0.0411	0.0416	0.0428	0.0355	0.0319	0.0401	0.0357	0.0318			0.08	0.0888
15	0.0630129	0.0956257	0.0308214	0.0314771	0.0330014	0.0434014	0.01979	0.0276729		15	0.0819	0.0883	0.0506	0.0436	0.0467	0.0578	0.0386	0.0264		0.0799	0.0883	0.0552	0.0455	0.0436	0.0586	0.0396	0.0247		0.0789	0.086	0.0619	0.0488	0.0437	0.0568	0.0471	0.0275		0.0411	0.0416	0.0429	0.0358	0.0324	0.0405	0.0363	0.0329			0.0796	0.0881
15.2	0.0699629	0.105226	0.0323714	0.0381771	0.0268514	0.0451514	0.02119	0.0298229		15.2	0.0804	0.0873	0.0519	0.0444	0.046	0.0589	0.0423	0.0223		0.0789	0.0877	0.0559	0.0468	0.0438	0.0595	0.0416	0.0248		0.0779	0.0842	0.0618	0.0493	0.0446	0.0568	0.0476	0.0287		0.041	0.0415	0.043	0.0361	0.0328	0.0408	0.0368	0.0339			0.0783	0.0871
15.4	0.0670629	0.111276	0.0336214	0.0333271	0.0289014	0.0470514	0.02349	0.0261229		15.4	0.0785	0.0867	0.0526	0.0444	0.0479	0.0596	0.0421	0.0243		0.0778	0.0867	0.0562	0.0476	0.0453	0.0595	0.0417	0.0265		0.0763	0.0823	0.0617	0.0502	0.0455	0.057	0.0477	0.029		0.041	0.0414	0.043	0.0363	0.0331	0.0411	0.0371	0.0347			0.0771	0.0863
15.6	0.0702629	0.0845257	0.0345214	0.0340271	0.0351514	0.0388514	0.02554	0.0298729		15.6	0.077	0.0859	0.0523	0.045	0.0468	0.0595	0.041	0.0257		0.0764	0.0858	0.0556	0.0481	0.0461	0.0585	0.0425	0.0267		0.0757	0.0813	0.0618	0.0505	0.0462	0.0569	0.0478	0.0291		0.0409	0.0413	0.043	0.0365	0.0333	0.0412	0.0374	0.0353			0.0761	0.0858
15.8	0.0677629	0.0775257	0.0302714	0.0325771	0.0311514	0.0436514	0.02524	0.0307729		15.8	0.076	0.0847	0.0522	0.046	0.0472	0.0592	0.0417	0.0257		0.0755	0.0849	0.0552	0.0483	0.0466	0.0582	0.0435	0.0264		0.0749	0.0811	0.0618	0.0505	0.0462	0.0566	0.0479	0.0293		0.0408	0.0412	0.043	0.0365	0.0335	0.0414	0.0377	0.0358			0.0748	0.0846
16	0.0772129	0.0747757	0.0344714	0.0393771	0.0330514	0.0485514	0.02714	0.0331729		16	0.0757	0.0843	0.0526	0.0467	0.047	0.0589	0.044	0.0251		0.0747	0.0846	0.0554	0.0484	0.0468	0.0578	0.045	0.0264		0.0731	0.08	0.0615	0.0507	0.046	0.0564	0.048	0.0297		0.0406	0.0411	0.0429	0.0366	0.0336	0.0414	0.0378	0.0361			0.0741	0.0841
16.2	0.0789129	0.0709757	0.0347714	0.0442771	0.0382014	0.0618514	0.02834	0.0332729		16.2	0.0757	0.0836	0.0521	0.0467	0.0469	0.058	0.046	0.025		0.0746	0.0845	0.0561	0.0482	0.0459	0.0573	0.046	0.0272		0.0731	0.0783	0.0609	0.0508	0.046	0.0564	0.0483	0.03		0.0405	0.0409	0.0428	0.0366	0.0337	0.0415	0.0379	0.0364			0.074	0.0842
16.4	0.0774629	0.0811757	0.0324214	0.0332771	0.0400014	0.0634014	0.03359	0.0343229		16.4	0.075	0.0832	0.0516	0.0469	0.0469	0.0572	0.0455	0.0257		0.0739	0.0839	0.0562	0.048	0.0452	0.0569	0.0456	0.0276		0.0737	0.0789	0.0608	0.0504	0.046	0.0562	0.0486	0.0301		0.0403	0.0407	0.0427	0.0366	0.0337	0.0415	0.038	0.0366			0.0735	0.0837
16.6	0.0761629	0.0817757	0.0313214	0.0425271	0.0402014	0.0418514	0.03634	0.0313229		16.6	0.0745	0.0832	0.0517	0.047	0.0464	0.0568	0.0454	0.0265		0.0738	0.0834	0.056	0.0479	0.045	0.0569	0.045	0.0274		0.0735	0.0784	0.0611	0.0498	0.0455	0.0555	0.0486	0.0302		0.0401	0.0405	0.0426	0.0365	0.0337	0.0414	0.038	0.0368			0.0732	0.0834
16.8	0.0771129	0.0824257	0.0332714	0.0389271	0.0362014	0.0499514	0.03419	0.0316729		16.8	0.0741	0.0833	0.052	0.0466	0.0464	0.0569	0.0458	0.0262		0.0734	0.083	0.056	0.0479	0.0451	0.0566	0.0453	0.0271		0.0729	0.0768	0.0607	0.0501	0.0453	0.0552	0.048	0.0305		0.0399	0.0403	0.0424	0.0364	0.0336	0.0414	0.038	0.0369			0.0728	0.083
17	0.0729629	0.0762257	0.0321214	0.0473271	0.0393514	0.0537514	0.03439	0.0324229		17	0.074	0.0833	0.0527	0.0468	0.0458	0.0564	0.0465	0.0258		0.0728	0.0823	0.0564	0.0479	0.0452	0.0557	0.0455	0.0269		0.0722	0.0758	0.0603	0.051	0.046	0.0556	0.0478	0.0313		0.0397	0.0401	0.0423	0.0363	0.0335	0.0413	0.0379	0.0369			0.0726	0.0819
17.2	0.0750129	0.0799757	0.0358214	0.0399271	0.0415014	0.0636014	0.03454	0.0307229		17.2	0.0739	0.0826	0.0528	0.0468	0.0456	0.0563	0.0467	0.0255		0.0728	0.0817	0.0562	0.0482	0.0452	0.0553	0.0454	0.027		0.0719	0.0752	0.0604	0.0506	0.0466	0.0556	0.0484	0.0322		0.0395	0.0399	0.0421	0.0362	0.0334	0.0412	0.0378	0.0369			0.0724	0.0814
17.4	0.0708629	0.0837757	0.0352214	0.0432771	0.0432514	0.0693514	0.03829	0.0321729		17.4	0.0737	0.0817	0.0523	0.047	0.0453	0.0558	0.0465	0.0248		0.0724	0.0809	0.0562	0.0482	0.0452	0.055	0.0459	0.0269		0.0721	0.0752	0.0599	0.0498	0.0465	0.0552	0.0489	0.0339		0.0393	0.0397	0.0419	0.036	0.0333	0.041	0.0377	0.0369			0.0719	0.0809
17.6	0.0708629	0.0842257	0.0340714	0.0421271	0.0461014	0.0547014	0.03414	0.0338229		17.6	0.0734	0.0809	0.0522	0.0471	0.0453	0.0559	0.0463	0.0241		0.0721	0.0799	0.0559	0.0481	0.0453	0.0549	0.0468	0.0269		0.072	0.0733	0.0604	0.0503	0.0465	0.0548	0.0488	0.0345		0.0392	0.0396	0.0418	0.0359	0.0332	0.0409	0.0376	0.0368			0.0719	0.0798
17.8	0.0729629	0.0819257	0.0336214	0.0453771	0.0394514	0.0497514	0.04119	0.0291229		17.8	0.0729	0.08	0.0524	0.0472	0.0456	0.0556	0.0469	0.0266		0.0714	0.0794	0.0559	0.0481	0.0452	0.055	0.0473	0.0276		0.0716	0.0736	0.0595	0.0508	0.0468	0.0552	0.0491	0.0352		0.039	0.0394	0.0416	0.0357	0.033	0.0408	0.0375	0.0367			0.0713	0.079
18	0.0697129	0.0762757	0.0375214	0.0404271	0.0399014	0.0540514	0.04054	0.0290729		18	0.0724	0.0794	0.0527	0.0473	0.0457	0.0551	0.0481	0.0288		0.0709	0.0792	0.0562	0.0482	0.0452	0.0551	0.0477	0.0282		0.0718	0.0737	0.0608	0.0511	0.0471	0.0555	0.0493	0.0361		0.0388	0.0392	0.0414	0.0356	0.0329	0.0406	0.0374	0.0366			0.0709	0.0787
18.2	0.0742629	0.0809757	0.0325714	0.0507771	0.0393014	0.0642014	0.04084	0.0342229		18.2	0.0721	0.0796	0.0526	0.0476	0.0459	0.0547	0.0484	0.0286		0.0706	0.0794	0.056	0.0483	0.0449	0.0549	0.0481	0.0287		0.0721	0.0733	0.0608	0.0509	0.0474	0.0554	0.0496	0.0364		0.0386	0.039	0.0413	0.0354	0.0327	0.0405	0.0372	0.0365			0.0707	0.0788
18.4	0.0737629	0.0815257	0.0325714	0.0409771	0.0416514	0.0710014	0.04294	0.0291729		18.4	0.0721	0.0796	0.0524	0.0476	0.0456	0.0547	0.0487	0.026		0.0707	0.0796	0.0558	0.0481	0.0449	0.0549	0.0479	0.0287		0.0723	0.0749	0.0606	0.051	0.0471	0.0554	0.0496	0.0368		0.0385	0.0388	0.0411	0.0353	0.0326	0.0403	0.0371	0.0364			0.0706	0.0791
18.6	0.0740629	0.0788257	0.0320214	0.0417771	0.0400014	0.0601014	0.03824	0.0300729		18.6	0.0723	0.0797	0.0521	0.0473	0.0456	0.0549	0.049	0.0277		0.0708	0.0797	0.0557	0.0479	0.0451	0.055	0.0479	0.0283		0.0727	0.075	0.0615	0.0512	0.0473	0.0558	0.0495	0.0369		0.0383	0.0387	0.0409	0.0351	0.0324	0.0402	0.0369	0.0362			0.0707	0.0791
18.8	0.0743129	0.0785257	0.0317714	0.0413271	0.0428514	0.0538514	0.04364	0.0309729		18.8	0.0726	0.0797	0.052	0.0472	0.0454	0.0551	0.0496	0.0274		0.0708	0.0797	0.0555	0.0479	0.0451	0.0551	0.0483	0.0283		0.0726	0.0758	0.0611	0.0513	0.0476	0.0559	0.0498	0.0369		0.0381	0.0385	0.0408	0.035	0.0323	0.04	0.0368	0.0361			0.0706	0.0793
19	0.0730629	0.0849757	0.0327714	0.0526771	0.0372014	0.0570514	0.04139	0.0302729		19	0.0724	0.0799	0.0519	0.0476	0.0454	0.0553	0.0502	0.0273		0.0709	0.0795	0.0554	0.0483	0.0453	0.0552	0.0486	0.0288		0.0723	0.0763	0.0615	0.0518	0.0477	0.0564	0.0499	0.0373		0.0379	0.0383	0.0406	0.0348	0.0321	0.0399	0.0366	0.036			0.0706	0.0794
19.2	0.0711129	0.0779757	0.0355214	0.0408771	0.0432014	0.0669014	0.03859	0.0340729		19.2	0.0723	0.0799	0.0517	0.0482	0.0454	0.0555	0.0498	0.0282		0.0709	0.0793	0.0555	0.0484	0.0455	0.0553	0.0487	0.0291		0.0719	0.0761	0.0614	0.0519	0.048	0.0566	0.0502	0.0378		0.0377	0.0381	0.0404	0.0346	0.0319	0.0397	0.0365	0.0358			0.0706	0.0792
19.4	0.0724629	0.0750757	0.0300214	0.0425771	0.0384514	0.0736014	0.04249	0.0312729		19.4	0.0719	0.0796	0.0516	0.0483	0.0456	0.0557	0.0496	0.0302		0.0706	0.0792	0.0558	0.0484	0.0455	0.0553	0.0488	0.029		0.0717	0.0761	0.0613	0.0519	0.048	0.0567	0.0505	0.0381		0.0375	0.0379	0.0402	0.0344	0.0318	0.0395	0.0363	0.0356			0.0705	0.079
19.6	0.0699129	0.0842257	0.0302714	0.0423271	0.0482014	0.0530014	0.04449	0.0293729		19.6	0.0716	0.0793	0.0521	0.0483	0.0457	0.0556	0.0498	0.0323		0.0703	0.0791	0.056	0.0485	0.0455	0.0553	0.0489	0.0291		0.0716	0.0761	0.0612	0.052	0.0478	0.0569	0.0506	0.0386		0.0373	0.0377	0.04	0.0343	0.0316	0.0393	0.0361	0.0355			0.0702	0.0789
19.8	0.0704629	0.0813757	0.0324714	0.0427771	0.0452014	0.0497514	0.04469	0.0366229		19.8	0.0712	0.0789	0.0525	0.0482	0.046	0.0554	0.0501	0.0314		0.0702	0.0788	0.0558	0.0487	0.0455	0.0553	0.0491	0.0293		0.0712	0.0765	0.0611	0.0518	0.0478	0.0567	0.0507	0.0391		0.0371	0.0374	0.0398	0.0341	0.0314	0.0391	0.0359	0.0353			0.0699	0.0786
20	0.0717629	0.0910757	0.0322214	0.0452771	0.0421514	0.0529014	0.04289	0.0306729		20	0.0708	0.0785	0.0527	0.0481	0.046	0.0554	0.0505	0.0292		0.07	0.0783	0.0556	0.0487	0.0456	0.0552	0.0492	0.0299		0.0708	0.0762	0.061	0.0518	0.0478	0.0566	0.0507	0.0395		0.0368	0.0372	0.0396	0.0339	0.0312	0.039	0.0357	0.0351			0.0699	0.078
20.2	0.0725129	0.0865757	0.0305714	0.0416771	0.0406514	0.0665014	0.04224	0.0273729		20.2	0.0705	0.0779	0.0523	0.0477	0.0458	0.0559	0.0517	0.0315		0.0696	0.0775	0.0554	0.0486	0.0456	0.055	0.0494	0.0307		0.0701	0.075	0.0608	0.0517	0.0478	0.0566	0.0507	0.0399		0.0366	0.0369	0.0393	0.0336	0.031	0.0387	0.0356	0.035			0.0694	0.0774
20.4	0.0702629	0.0827757	0.0291214	0.0471271	0.0410514	0.0609014	0.04319	0.0306229		20.4	0.0702	0.0772	0.0515	0.0474	0.0456	0.0563	0.0524	0.033		0.0693	0.0768	0.0548	0.0486	0.0457	0.0548	0.0494	0.0302		0.0696	0.0748	0.0602	0.0515	0.0478	0.0566	0.0506	0.0402		0.0363	0.0367	0.0391	0.0334	0.0308	0.0385	0.0354	0.0348			0.0689	0.0767
20.6	0.0706629	0.0781757	0.0301714	0.0368271	0.0390014	0.0530014	0.04664	0.0311729		20.6	0.0697	0.0765	0.0508	0.0475	0.0456	0.0561	0.0519	0.0295		0.0687	0.0759	0.0548	0.0485	0.0457	0.0547	0.0495	0.0291		0.0691	0.0744	0.0601	0.0514	0.0477	0.0565	0.0506	0.0404		0.0361	0.0364	0.0389	0.0332	0.0306	0.0383	0.0351	0.0346			0.0686	0.0759
20.8	0.0715129	0.0853257	0.0327214	0.0444771	0.0385514	0.0477014	0.04089	0.0393229		20.8	0.0693	0.0759	0.0504	0.0477	0.046	0.0554	0.0508	0.0298		0.0682	0.0751	0.0546	0.0483	0.0457	0.0545	0.0495	0.0288		0.0685	0.0736	0.0596	0.0511	0.0474	0.056	0.0505	0.0407		0.0358	0.0362	0.0386	0.033	0.0303	0.0381	0.0349	0.0344			0.0679	0.0752
21	0.0716129	0.0829757	0.0332714	0.0414771	0.0390014	0.0596014	0.04209	0.0320729		21	0.0686	0.0754	0.0502	0.0476	0.046	0.0547	0.0501	0.0303		0.0677	0.0745	0.0545	0.0481	0.0454	0.0542	0.0494	0.0291		0.068	0.0731	0.0593	0.0509	0.0471	0.0558	0.0502	0.0409		0.0356	0.0359	0.0384	0.0327	0.0301	0.0379	0.0347	0.0342			0.0676	0.0744
21.2	0.0729629	0.0794257	0.0340214	0.0444271	0.0385514	0.0672014	0.03899	0.0269229		21.2	0.068	0.0748	0.0501	0.0477	0.0454	0.0542	0.05	0.032		0.0673	0.0738	0.0544	0.048	0.0453	0.054	0.0493	0.0296		0.0672	0.0728	0.0592	0.0507	0.0469	0.0557	0.05	0.0409		0.0353	0.0357	0.0381	0.0325	0.0299	0.0376	0.0345	0.0339			0.067	0.0738
21.4	0.0713129	0.0802257	0.0331214	0.0406771	0.0443514	0.0627514	0.04089	0.0309729		21.4	0.0675	0.0742	0.0503	0.0476	0.0448	0.0541	0.0506	0.0306		0.0667	0.0732	0.0542	0.0478	0.0451	0.0538	0.0492	0.03		0.0667	0.072	0.0587	0.0504	0.0468	0.0555	0.05	0.0409		0.0351	0.0355	0.0379	0.0323	0.0297	0.0374	0.0343	0.0337			0.0667	0.073
21.6	0.0684129	0.0817257	0.0334214	0.0419771	0.0421014	0.0570514	0.04204	0.0310729		21.6	0.0668	0.0737	0.0505	0.0471	0.0444	0.0538	0.0511	0.0291		0.0662	0.0726	0.054	0.0477	0.045	0.0537	0.0492	0.0307		0.0664	0.0711	0.0583	0.0502	0.0465	0.0553	0.0499	0.041		0.0349	0.0353	0.0377	0.0321	0.0295	0.0372	0.034	0.0335			0.0661	0.0726
21.8	0.0695629	0.0768757	0.0325714	0.0451271	0.0490014	0.0508514	0.04269	0.0332229		21.8	0.0662	0.0731	0.0506	0.0467	0.044	0.0537	0.0512	0.031		0.0656	0.072	0.0536	0.0476	0.045	0.0534	0.0492	0.0328		0.0657	0.0706	0.058	0.0499	0.0462	0.055	0.0498	0.041		0.0347	0.0351	0.0375	0.0319	0.0292	0.037	0.0338	0.0333			0.0657	0.0718
22	0.0676129	0.0797257	0.0339214	0.0458771	0.0403014	0.0482014	0.04729	0.0272229		22	0.0656	0.0725	0.0501	0.0465	0.0441	0.0541	0.0514	0.031		0.065	0.0715	0.0534	0.0474	0.0449	0.0531	0.049	0.0345		0.0652	0.0701	0.0577	0.0495	0.0459	0.0547	0.0496	0.0409		0.0345	0.0349	0.0373	0.0316	0.029	0.0368	0.0336	0.0331			0.065	0.0715
22.2	0.0674629	0.0791757	0.0333214	0.0386771	0.0429514	0.0576014	0.03539	0.0295229		22.2	0.065	0.072	0.0495	0.0464	0.0445	0.0544	0.0512	0.0293		0.0645	0.071	0.0528	0.0472	0.0447	0.0528	0.0488	0.0357		0.0647	0.0697	0.0572	0.0495	0.0459	0.0545	0.0493	0.0407		0.0343	0.0347	0.0371	0.0314	0.0288	0.0366	0.0334	0.0329			0.0645	0.071
22.4	0.0694629	0.0724257	0.0335214	0.0419771	0.0439014	0.0628514	0.04369	0.0294229		22.4	0.0647	0.0718	0.0492	0.0462	0.045	0.054	0.0506	0.0312		0.0641	0.0709	0.0527	0.047	0.0444	0.0526	0.0485	0.037		0.0646	0.0696	0.057	0.0494	0.0457	0.0543	0.0492	0.0405		0.0341	0.0345	0.0369	0.0312	0.0286	0.0364	0.0332	0.0327			0.0643	0.0708
22.6	0.0671629	0.0774757	0.0324714	0.0431771	0.0442514	0.0592014	0.03909	0.0309229		22.6	0.0646	0.0717	0.0491	0.0461	0.0454	0.0529	0.05	0.0306		0.0639	0.0708	0.0524	0.0468	0.0441	0.0524	0.0484	0.0375		0.0647	0.0696	0.057	0.0489	0.0454	0.054	0.0491	0.0404		0.0339	0.0343	0.0367	0.0311	0.0284	0.0362	0.033	0.0325			0.064	0.0708
22.8	0.0672629	0.0781257	0.0328714	0.0446271	0.0445514	0.0584514	0.04419	0.0331729		22.8	0.0646	0.0717	0.0491	0.0462	0.045	0.0521	0.0496	0.0282		0.0639	0.0707	0.0524	0.0466	0.0438	0.0522	0.0482	0.038		0.0647	0.0696	0.0569	0.0486	0.0451	0.0537	0.0488	0.0403		0.0337	0.0341	0.0365	0.0309	0.0282	0.036	0.0328	0.0323			0.064	0.0706
23	0.0655629	0.0781257	0.0340714	0.0447271	0.0370014	0.0583514	0.04289	0.0337729		23	0.0647	0.0717	0.049	0.0463	0.0442	0.052	0.0493	0.0305		0.0638	0.0706	0.0523	0.0467	0.0436	0.0521	0.0481	0.0372		0.0646	0.0696	0.0569	0.0487	0.045	0.0537	0.0485	0.0401		0.0335	0.0339	0.0363	0.0307	0.028	0.0358	0.0327	0.0321			0.064	0.0706
23.2	0.0646629	0.0752757	0.0359214	0.0389271	0.0446514	0.0561514	0.04054	0.0293729		23.2	0.0647	0.0717	0.0492	0.0462	0.0434	0.0525	0.0496	0.032		0.0638	0.0704	0.0523	0.0466	0.0436	0.052	0.0481	0.036		0.0645	0.0694	0.0568	0.0487	0.0451	0.0537	0.0484	0.0399		0.0333	0.0337	0.0361	0.0305	0.0279	0.0356	0.0325	0.0319			0.0639	0.0703
23.4	0.0646129	0.0781257	0.0345214	0.0415771	0.0432014	0.0590514	0.04449	0.0292729		23.4	0.0647	0.0716	0.0494	0.046	0.0431	0.0529	0.05	0.0317		0.0636	0.0701	0.0523	0.0466	0.0437	0.052	0.048	0.037		0.0642	0.0691	0.0566	0.0486	0.0451	0.0537	0.0485	0.0399		0.0331	0.0335	0.036	0.0303	0.0277	0.0355	0.0323	0.0317			0.0637	0.07
23.6	0.0654129	0.0779257	0.0331214	0.0415771	0.0434514	0.0621514	0.04084	0.0309229		23.6	0.0644	0.0714	0.0492	0.0461	0.0432	0.0529	0.0501	0.0321		0.0634	0.0697	0.0521	0.0466	0.0438	0.0519	0.048	0.0375		0.0639	0.0688	0.0564	0.0486	0.045	0.0535	0.0485	0.0399		0.0329	0.0333	0.0358	0.0301	0.0275	0.0353	0.0321	0.0315			0.0634	0.0698
23.8	0.0679129	0.0737757	0.0321214	0.0401771	0.0471514	0.0580014	0.04099	0.0324229		23.8	0.0641	0.0712	0.0485	0.0464	0.0436	0.0528	0.0502	0.0352		0.0631	0.0694	0.0519	0.0466	0.0438	0.0518	0.048	0.0379		0.0636	0.0685	0.0562	0.0484	0.0449	0.0534	0.0485	0.0399		0.0327	0.0331	0.0355	0.0299	0.0273	0.0351	0.0319	0.0313			0.0632	0.0694
24	0.0666129	0.0800757	0.0347214	0.0446271	0.0418514	0.0561514	0.03974	0.0304729		24	0.0636	0.0709	0.0481	0.0465	0.0439	0.0527	0.0497	0.0297		0.0628	0.0691	0.0518	0.0465	0.0437	0.0517	0.0479	0.038		0.0632	0.0683	0.056	0.0483	0.0448	0.0532	0.0484	0.0398		0.0325	0.0329	0.0353	0.0297	0.0271	0.0349	0.0317	0.0311			0.0629	0.0691
24.2	0.0636129	0.0773757	0.0356214	0.0393271	0.0461014	0.0508514	0.04334	0.0334729		24.2	0.0632	0.0705	0.0482	0.0462	0.0441	0.0524	0.0492	0.0298		0.0625	0.0686	0.0517	0.0463	0.0435	0.0515	0.0479	0.0382		0.0629	0.0679	0.0558	0.0481	0.0447	0.053	0.0484	0.0397		0.0323	0.0327	0.0352	0.0295	0.0269	0.0347	0.0315	0.0309			0.0626	0.0686
24.4	0.0651129	0.0710757	0.0347214	0.0445771	0.0441514	0.0508514	0.04074	0.0311729		24.4	0.0628	0.0699	0.0481	0.0462	0.044	0.0518	0.0488	0.0312		0.0621	0.0682	0.0514	0.0461	0.0434	0.0513	0.0477	0.0384		0.0626	0.0674	0.0556	0.0478	0.0444	0.0529	0.0482	0.0395		0.0321	0.0325	0.035	0.0293	0.0267	0.0345	0.0313	0.0308			0.0623	0.0682
24.6	0.0654629	0.0728757	0.0327714	0.0460771	0.0409514	0.0535014	0.03824	0.0324229		24.6	0.0623	0.0693	0.0479	0.0461	0.0436	0.0515	0.0486	0.0327		0.0617	0.0676	0.0512	0.046	0.0432	0.0512	0.0476	0.0383		0.0622	0.0669	0.0553	0.0476	0.0442	0.0527	0.0479	0.0394		0.0319	0.0323	0.0348	0.0291	0.0265	0.0343	0.0312	0.0306			0.0619	0.0677
24.8	0.0642629	0.0756257	0.0310214	0.0397771	0.0429514	0.0519514	0.04409	0.0311729		24.8	0.0619	0.0686	0.0477	0.0457	0.0431	0.0514	0.0486	0.031		0.0613	0.067	0.0509	0.0458	0.0431	0.051	0.0474	0.0369		0.0617	0.0663	0.055	0.0473	0.044	0.0525	0.0477	0.0392		0.0318	0.0322	0.0346	0.029	0.0263	0.0341	0.031	0.0304			0.0616	0.0672
25	0.0636129	0.0735757	0.0325714	0.0404771	0.0453514	0.0563014	0.03829	0.0292229		25	0.0614	0.0679	0.0475	0.0451	0.0423	0.0516	0.0489	0.0302		0.0609	0.0665	0.0506	0.0455	0.0429	0.0508	0.0472	0.0354		0.0612	0.0658	0.0546	0.047	0.0438	0.0522	0.0475	0.0391		0.0316	0.032	0.0345	0.0288	0.0262	0.034	0.0308	0.0302			0.0612	0.0666
25.2	0.0642129	0.0756757	0.0319714	0.0398271	0.0436014	0.0559014	0.04454	0.0292229		25.2	0.0609	0.0674	0.0473	0.0446	0.0418	0.0516	0.049	0.0307		0.0604	0.0662	0.0503	0.0453	0.0427	0.0505	0.047	0.0362		0.0607	0.0654	0.0543	0.0468	0.0435	0.0519	0.0473	0.0388		0.0315	0.0319	0.0343	0.0286	0.026	0.0338	0.0306	0.03			0.0607	0.0662
25.4	0.0632129	0.0740757	0.0302214	0.0416771	0.0412014	0.0532014	0.04024	0.0273229		25.4	0.0606	0.0672	0.0469	0.0444	0.0417	0.0511	0.0488	0.0302		0.0601	0.0661	0.05	0.045	0.0425	0.0502	0.0468	0.0366		0.0604	0.0652	0.054	0.0465	0.0432	0.0516	0.047	0.0386		0.0314	0.0318	0.0342	0.0285	0.0259	0.0337	0.0305	0.0299			0.0604	0.0661
25.6	0.0628629	0.0725757	0.0298714	0.0416771	0.0409014	0.0534014	0.04054	0.0315229		25.6	0.0604	0.0672	0.0466	0.0442	0.042	0.0504	0.0482	0.0291		0.0599	0.0661	0.0499	0.0448	0.0422	0.0499	0.0466	0.037		0.0603	0.0651	0.0537	0.0462	0.0428	0.0513	0.0468	0.0384		0.0312	0.0316	0.0341	0.0283	0.0257	0.0335	0.0303	0.0297			0.0602	0.0661
25.8	0.0611129	0.0744757	0.0313714	0.0408771	0.0401014	0.0490514	0.03764	0.0314229		25.8	0.0604	0.0673	0.0464	0.0441	0.0421	0.05	0.0472	0.0318		0.0598	0.0661	0.0498	0.0446	0.0419	0.0496	0.0463	0.0372		0.0603	0.0651	0.0536	0.0459	0.0425	0.051	0.0465	0.0382		0.0311	0.0315	0.0339	0.0282	0.0256	0.0334	0.0302	0.0295			0.0601	0.0661
26	0.0614129	0.0751757	0.0316214	0.0398271	0.0419514	0.0575514	0.03909	0.0319229		26	0.0603	0.0674	0.0465	0.0441	0.0419	0.0499	0.0465	0.0329		0.0598	0.0662	0.0497	0.0445	0.0418	0.0495	0.0462	0.0372		0.0603	0.0651	0.0535	0.0457	0.0423	0.0508	0.0463	0.0381		0.031	0.0314	0.0338	0.028	0.0254	0.0332	0.03	0.0294			0.06	0.0662
26.2	0.0632129	0.0705257	0.0320714	0.0419271	0.0421514	0.0545514	0.04249	0.0311729		26.2	0.0603	0.0674	0.0467	0.0442	0.0413	0.05	0.0467	0.0253		0.0597	0.0661	0.0496	0.0444	0.0417	0.0495	0.0461	0.037		0.0602	0.065	0.0535	0.0457	0.0423	0.0507	0.0461	0.0379		0.0308	0.0312	0.0337	0.0279	0.0253	0.0331	0.0299	0.0292			0.06	0.0661
26.4	0.0605129	0.0754257	0.0312714	0.0358771	0.0402514	0.0543014	0.04219	0.0290729		26.4	0.0601	0.0673	0.0467	0.0444	0.0409	0.05	0.0472	0.0263		0.0595	0.0659	0.0496	0.0445	0.0417	0.0495	0.0461	0.0369		0.0601	0.0649	0.0534	0.0457	0.0423	0.0507	0.046	0.0378		0.0307	0.0311	0.0335	0.0278	0.0251	0.033	0.0298	0.0291			0.0598	0.0659
26.6	0.0620629	0.0708757	0.0332214	0.0439771	0.0415514	0.0517014	0.03919	0.0292729		26.6	0.0598	0.0671	0.0465	0.0443	0.0407	0.0499	0.0474	0.0299		0.0593	0.0657	0.0494	0.0444	0.0418	0.0495	0.0461	0.0368		0.0599	0.0647	0.0533	0.0457	0.0423	0.0506	0.046	0.0376		0.0306	0.031	0.0334	0.0277	0.025	0.0328	0.0296	0.029			0.0595	0.0657
26.8	0.0609129	0.0735757	0.0315714	0.0363771	0.0350514	0.0474014	0.04124	0.0303729		26.8	0.0594	0.0668	0.0461	0.0441	0.0409	0.0498	0.0473	0.0318		0.059	0.0654	0.0492	0.0443	0.0418	0.0494	0.0461	0.0367		0.0596	0.0645	0.0532	0.0456	0.0422	0.0506	0.0459	0.0375		0.0305	0.0309	0.0333	0.0275	0.0249	0.0327	0.0295	0.0288			0.0593	0.0655
27	0.0639629	0.0754757	0.0303214	0.0417771	0.0377514	0.0448014	0.03719	0.0294729		27	0.0591	0.0665	0.0459	0.0438	0.0411	0.0497	0.0473	0.0291		0.0587	0.0651	0.049	0.0442	0.0417	0.0493	0.0461	0.0365		0.0593	0.0643	0.053	0.0454	0.0421	0.0505	0.0458	0.0374		0.0304	0.0308	0.0332	0.0274	0.0248	0.0326	0.0294	0.0287			0.059	0.0652
27.2	0.0626129	0.0712257	0.0323714	0.0373271	0.0407514	0.0516014	0.04004	0.0299729		27.2	0.0588	0.0661	0.0457	0.0436	0.0412	0.0496	0.0472	0.031		0.0585	0.0648	0.0488	0.044	0.0416	0.0491	0.046	0.0363		0.0592	0.0641	0.0529	0.0453	0.0419	0.0503	0.0457	0.0372		0.0302	0.0307	0.0331	0.0273	0.0246	0.0325	0.0293	0.0286			0.0588	0.0649
27.4	0.0604129	0.0714757	0.0324214	0.0384271	0.0421014	0.0539514	0.03974	0.0280729		27.4	0.0586	0.0659	0.0455	0.0434	0.0411	0.0493	0.0468	0.028		0.0582	0.0646	0.0486	0.0438	0.0414	0.049	0.046	0.0359		0.0591	0.0639	0.0527	0.0451	0.0417	0.0502	0.0456	0.0371		0.0301	0.0305	0.0329	0.0272	0.0245	0.0324	0.0291	0.0284			0.0586	0.0647
27.6	0.0609629	0.0726257	0.0321714	0.0400771	0.0375514	0.0540514	0.04009	0.0302729		27.6	0.0584	0.0656	0.0453	0.0433	0.0408	0.0491	0.0463	0.0255		0.0581	0.0644	0.0485	0.0437	0.0413	0.0489	0.0459	0.0354		0.059	0.0638	0.0525	0.0449	0.0415	0.05	0.0454	0.0369		0.03	0.0304	0.0328	0.0271	0.0244	0.0323	0.029	0.0283			0.0585	0.0644
27.8	0.0597629	0.0708257	0.0317214	0.0372271	0.0387014	0.0531514	0.03669	0.0306229		27.8	0.0583	0.0653	0.0452	0.0433	0.0404	0.0491	0.0462	0.0282		0.0579	0.0641	0.0483	0.0436	0.0411	0.0487	0.0457	0.0351		0.0588	0.0637	0.0524	0.0447	0.0413	0.0498	0.0452	0.0367		0.0299	0.0303	0.0327	0.0269	0.0243	0.0321	0.0289	0.0282			0.0583	0.0642
28	0.0629129	0.0700757	0.0331714	0.0417771	0.0429014	0.0489514	0.04029	0.0312229		28	0.0581	0.065	0.0452	0.0432	0.0401	0.049	0.0464	0.0316		0.0578	0.0639	0.0481	0.0434	0.041	0.0487	0.0456	0.0348		0.0587	0.0635	0.0523	0.0446	0.0412	0.0497	0.0451	0.0365		0.0298	0.0302	0.0326	0.0268	0.0242	0.032	0.0288	0.0281			0.0582	0.064
28.2	0.0614629	0.0714257	0.0322214	0.0338771	0.0407014	0.0492514	0.03989	0.0318729		28.2	0.058	0.0647	0.0452	0.0429	0.0399	0.0489	0.0466	0.0336		0.0577	0.0638	0.048	0.0433	0.0409	0.0486	0.0455	0.0345		0.0585	0.0633	0.0521	0.0445	0.0411	0.0496	0.0449	0.0364		0.0297	0.0301	0.0325	0.0267	0.0241	0.0319	0.0287	0.028			0.058	0.0639
28.4	0.0611629	0.0710757	0.0364214	0.0435771	0.0383014	0.0487014	0.04219	0.0296729		28.4	0.058	0.0645	0.0451	0.0425	0.04	0.0485	0.0465	0.0283		0.0576	0.0636	0.0479	0.0432	0.0408	0.0484	0.0453	0.0342		0.0582	0.063	0.052	0.0444	0.0409	0.0495	0.0449	0.0362		0.0296	0.03	0.0324	0.0266	0.024	0.0318	0.0286	0.0278			0.0579	0.0637
28.6	0.0607129	0.0704757	0.0343714	0.0315271	0.0393514	0.0516514	0.03899	0.0297729		28.6	0.0579	0.0644	0.0448	0.0424	0.0402	0.0483	0.0463	0.0266		0.0574	0.0635	0.0478	0.0431	0.0406	0.0483	0.0451	0.0339		0.0579	0.0627	0.0518	0.0442	0.0408	0.0494	0.0448	0.0361		0.0295	0.0299	0.0323	0.0265	0.0238	0.0317	0.0285	0.0277			0.0577	0.0636
28.8	0.0593129	0.0706757	0.0307714	0.0434771	0.0387014	0.0510014	0.04104	0.0292729		28.8	0.0579	0.0643	0.0446	0.0424	0.0403	0.0482	0.046	0.0299		0.0571	0.0634	0.0477	0.043	0.0404	0.0482	0.0449	0.0335		0.0576	0.0625	0.0516	0.0441	0.0406	0.0492	0.0446	0.0359		0.0294	0.0298	0.0322	0.0264	0.0237	0.0316	0.0284	0.0276			0.0575	0.0635
29	0.0591129	0.0724757	0.0317714	0.0375271	0.0376014	0.0503014	0.03529	0.0294229		29	0.0577	0.0642	0.0446	0.0425	0.0401	0.0484	0.0456	0.0302		0.0569	0.0632	0.0476	0.0429	0.0402	0.048	0.0448	0.0331		0.0574	0.0623	0.0514	0.0439	0.0405	0.049	0.0445	0.0358		0.0292	0.0296	0.0321	0.0263	0.0236	0.0315	0.0283	0.0275			0.0573	0.0633
29.2	0.0621629	0.0716257	0.0332214	0.0350771	0.0403514	0.0527014	0.03949	0.0290229		29.2	0.0574	0.064	0.0447	0.0424	0.0397	0.0484	0.0454	0.0306		0.0567	0.063	0.0475	0.0427	0.0401	0.0479	0.0446	0.0328		0.0572	0.062	0.0512	0.0437	0.0403	0.0488	0.0443	0.0357		0.0291	0.0295	0.0319	0.0262	0.0235	0.0314	0.0282	0.0274			0.0571	0.0631
29.4	0.0580629	0.0710757	0.0317214	0.0425771	0.0404014	0.0519014	0.03889	0.0273729		29.4	0.0569	0.0637	0.0446	0.0424	0.0394	0.0482	0.0454	0.0318		0.0564	0.0626	0.0473	0.0426	0.0399	0.0478	0.0445	0.0326		0.0569	0.0618	0.051	0.0435	0.0401	0.0486	0.0442	0.0356		0.029	0.0294	0.0318	0.0261	0.0234	0.0313	0.028	0.0273			0.0568	0.0628
29.6	0.0579629	0.0700757	0.0326214	0.0320771	0.0382514	0.0496514	0.04199	0.0277729		29.6	0.0564	0.0635	0.0443	0.0424	0.0393	0.0479	0.0454	0.0294		0.0561	0.0623	0.0471	0.0424	0.0398	0.0476	0.0444	0.0323		0.0567	0.0615	0.0509	0.0433	0.04	0.0485	0.044	0.0354		0.0288	0.0292	0.0317	0.0259	0.0233	0.0312	0.0279	0.0272			0.0565	0.0624
29.8	0.0577129	0.0704757	0.0350714	0.0423771	0.0397014	0.0461514	0.03354	0.0290729		29.8	0.0559	0.0632	0.0441	0.0424	0.0392	0.0477	0.0454	0.0275		0.0558	0.0619	0.0469	0.0423	0.0397	0.0475	0.0443	0.0318		0.0564	0.0611	0.0507	0.0432	0.0399	0.0484	0.0438	0.0353		0.0287	0.0291	0.0316	0.0258	0.0232	0.031	0.0278	0.0271			0.0562	0.0621
30	0.0571629	0.0693757	0.0327214	0.0320771	0.0371514	0.0449014	0.04099	0.0290729		30	0.0555	0.0628	0.044	0.0421	0.0392	0.0475	0.0454	0.0291		0.0555	0.0616	0.0467	0.0422	0.0395	0.0473	0.0442	0.0312		0.0561	0.0608	0.0505	0.043	0.0397	0.0482	0.0437	0.0351		0.0285	0.0289	0.0314	0.0257	0.023	0.0309	0.0277	0.027			0.056	0.0617
30.2	0.0598129	0.0696757	0.0351214	0.0404771	0.0381514	0.0475014	0.03434	0.0280729		30.2	0.0552	0.0625	0.0438	0.0417	0.0391	0.0473	0.0453	0.0307		0.0552	0.0612	0.0465	0.0419	0.0393	0.0471	0.044	0.0307		0.0558	0.0604	0.0503	0.0428	0.0395	0.0481	0.0435	0.035		0.0284	0.0288	0.0313	0.0255	0.0229	0.0308	0.0276	0.0268			0.0557	0.0614
30.4	0.0567129	0.0687257	0.0326214	0.0360771	0.0418014	0.0541514	0.03619	0.0295229		30.4	0.0551	0.0623	0.0435	0.0413	0.0389	0.047	0.045	0.0263		0.055	0.0608	0.0463	0.0417	0.0391	0.0469	0.0438	0.0304		0.0554	0.06	0.05	0.0426	0.0393	0.0479	0.0434	0.0349		0.0282	0.0286	0.0311	0.0254	0.0228	0.0306	0.0274	0.0267			0.0554	0.061
30.6	0.0592129	0.0690257	0.0331214	0.0354771	0.0393014	0.0527514	0.04159	0.0281229		30.6	0.055	0.0619	0.0432	0.0411	0.0387	0.0469	0.0447	0.0256		0.0546	0.0604	0.0461	0.0415	0.0389	0.0467	0.0436	0.0304		0.055	0.0596	0.0497	0.0424	0.0391	0.0476	0.0432	0.0347		0.0281	0.0285	0.031	0.0253	0.0226	0.0305	0.0273	0.0266			0.0551	0.0606
30.8	0.0593129	0.0662757	0.0345714	0.0416271	0.0366014	0.0485514	0.03674	0.0282229		30.8	0.055	0.0614	0.0429	0.0411	0.0385	0.0468	0.0445	0.0277		0.0543	0.0599	0.0459	0.0413	0.0387	0.0465	0.0434	0.0305		0.0546	0.0591	0.0495	0.0422	0.0389	0.0474	0.0431	0.0346		0.0279	0.0283	0.0308	0.0251	0.0225	0.0304	0.0272	0.0265			0.0547	0.0601
31	0.0576629	0.0686757	0.0361714	0.0308271	0.0368514	0.0508514	0.04254	0.0309729		31	0.0548	0.0609	0.0428	0.0411	0.0382	0.0468	0.0444	0.0291		0.0539	0.0595	0.0457	0.0412	0.0385	0.0463	0.0432	0.0306		0.0541	0.0586	0.0492	0.042	0.0387	0.0472	0.0429	0.0345		0.0278	0.0282	0.0307	0.025	0.0224	0.0302	0.0271	0.0263			0.0544	0.0597
31.2	0.0590129	0.0677757	0.0331714	0.0380771	0.0413014	0.0503014	0.03159	0.0307729		31.2	0.0544	0.0604	0.0428	0.041	0.0379	0.0466	0.0443	0.0279		0.0535	0.0591	0.0455	0.041	0.0384	0.046	0.0431	0.0307		0.0537	0.0582	0.0488	0.0417	0.0384	0.0469	0.0427	0.0343		0.0276	0.028	0.0306	0.0249	0.0222	0.0301	0.0269	0.0262			0.0539	0.0592
31.4	0.0560129	0.0664757	0.0342214	0.0324271	0.0361014	0.0516514	0.03934	0.0298229		31.4	0.0541	0.06	0.0427	0.0407	0.0378	0.0463	0.0442	0.0307		0.0531	0.0587	0.0452	0.0407	0.0382	0.0458	0.0429	0.0316		0.0533	0.0578	0.0485	0.0414	0.0382	0.0467	0.0425	0.0342		0.0275	0.0279	0.0304	0.0247	0.0221	0.03	0.0268	0.0261			0.0535	0.0589
31.6	0.0582129	0.0661257	0.0313214	0.0349271	0.0338514	0.0475014	0.03374	0.0302229		31.6	0.0538	0.0597	0.0425	0.0403	0.0378	0.046	0.044	0.0306		0.0528	0.0585	0.045	0.0405	0.038	0.0456	0.0427	0.0321		0.053	0.0575	0.0483	0.0411	0.0379	0.0464	0.0422	0.0341		0.0274	0.0278	0.0303	0.0246	0.022	0.0298	0.0267	0.0259			0.0533	0.0586
31.8	0.0578129	0.0642257	0.0323714	0.0377271	0.0379514	0.0492514	0.03904	0.0291229		31.8	0.0535	0.0594	0.0423	0.04	0.0379	0.0458	0.044	0.0268		0.0525	0.0582	0.0448	0.0403	0.0378	0.0453	0.0425	0.0322		0.0526	0.0573	0.0481	0.0409	0.0377	0.0462	0.042	0.034		0.0272	0.0276	0.0302	0.0245	0.0218	0.0297	0.0265	0.0258			0.053	0.0584
32	0.0564129	0.0685757	0.0314214	0.0340771	0.0396514	0.0489514	0.04124	0.0273229		32	0.0532	0.0592	0.0422	0.0399	0.0379	0.0456	0.0441	0.025		0.0523	0.058	0.0446	0.0401	0.0376	0.0451	0.0423	0.031		0.0524	0.057	0.0478	0.0407	0.0374	0.046	0.0418	0.0338		0.0271	0.0275	0.03	0.0243	0.0217	0.0296	0.0264	0.0257			0.0528	0.0582
32.2	0.0583129	0.0657757	0.0309714	0.0382771	0.0406014	0.0488014	0.03684	0.0290229		32.2	0.0529	0.0591	0.0422	0.0398	0.0377	0.0456	0.044	0.0291		0.0521	0.0578	0.0444	0.0399	0.0374	0.0449	0.0421	0.0304		0.0521	0.0568	0.0476	0.0405	0.0372	0.0458	0.0416	0.0336		0.027	0.0274	0.0299	0.0242	0.0216	0.0295	0.0263	0.0256			0.0526	0.0579
32.4	0.0569129	0.0650257	0.0313214	0.0288771	0.0325014	0.0511514	0.03354	0.0290729		32.4	0.0525	0.059	0.042	0.0397	0.0373	0.0457	0.0437	0.0287		0.0519	0.0575	0.0443	0.0397	0.0372	0.0448	0.0419	0.0304		0.0519	0.0565	0.0474	0.0403	0.037	0.0456	0.0414	0.0335		0.0268	0.0272	0.0298	0.0241	0.0215	0.0293	0.0262	0.0254			0.0524	0.0577
32.6	0.0577629	0.0662757	0.0319714	0.0420771	0.0365014	0.0501514	0.03384	0.0298229		32.6	0.0522	0.0589	0.0417	0.0396	0.0369	0.0457	0.0433	0.0247		0.0517	0.0573	0.0441	0.0396	0.0371	0.0446	0.0417	0.0303		0.0516	0.0563	0.0472	0.0401	0.0368	0.0454	0.0412	0.0334		0.0267	0.0271	0.0296	0.0239	0.0213	0.0292	0.026	0.0253			0.0522	0.0575
32.8	0.0579629	0.0627257	0.0307714	0.0329271	0.0370514	0.0502014	0.03784	0.0305729		32.8	0.0518	0.0587	0.0415	0.0396	0.0368	0.0456	0.043	0.0255		0.0515	0.0571	0.044	0.0394	0.0369	0.0445	0.0416	0.0305		0.0514	0.056	0.047	0.04	0.0366	0.0452	0.0411	0.0332		0.0266	0.027	0.0295	0.0238	0.0212	0.0291	0.0259	0.0252			0.0519	0.0573
33	0.0557629	0.0639757	0.0307214	0.0375771	0.0367014	0.0492514	0.03799	0.0289729		33	0.0516	0.0584	0.0413	0.0397	0.0369	0.0452	0.043	0.0226		0.0513	0.0569	0.0438	0.0392	0.0367	0.0443	0.0415	0.0307		0.0511	0.0558	0.0468	0.0398	0.0365	0.045	0.041	0.0331		0.0264	0.0268	0.0294	0.0237	0.0211	0.029	0.0258	0.0251			0.0518	0.0571
33.2	0.0551629	0.0667257	0.0331214	0.0367771	0.0373014	0.0486514	0.03639	0.0289729		33.2	0.0515	0.0581	0.0412	0.0396	0.037	0.0448	0.043	0.0235		0.0511	0.0567	0.0436	0.0391	0.0365	0.0441	0.0414	0.0317		0.0508	0.0556	0.0466	0.0396	0.0363	0.0448	0.0408	0.033		0.0263	0.0267	0.0293	0.0236	0.021	0.0288	0.0257	0.0249			0.0516	0.0569
33.4	0.0537129	0.0656257	0.0329714	0.0352771	0.0337014	0.0525014	0.03834	0.0287729		33.4	0.0514	0.0578	0.041	0.0392	0.0368	0.0445	0.0428	0.0259		0.051	0.0564	0.0435	0.039	0.0364	0.044	0.0412	0.0315		0.0506	0.0553	0.0464	0.0394	0.0361	0.0447	0.0407	0.0328		0.0262	0.0266	0.0292	0.0234	0.0208	0.0287	0.0255	0.0248			0.0514	0.0566
33.6	0.0567129	0.0643757	0.0333214	0.0377271	0.0359014	0.0474014	0.03364	0.0300729		33.6	0.0513	0.0575	0.0407	0.0388	0.0365	0.0444	0.0424	0.0261		0.0508	0.0561	0.0433	0.0388	0.0363	0.0439	0.0411	0.0319		0.0503	0.055	0.0462	0.0392	0.036	0.0445	0.0405	0.0327		0.0261	0.0265	0.0291	0.0233	0.0207	0.0286	0.0254	0.0247			0.0512	0.0563
33.8	0.0554629	0.0629257	0.0298214	0.0332771	0.0369014	0.0482014	0.03604	0.0310229		33.8	0.0512	0.0572	0.0404	0.0384	0.0361	0.0443	0.042	0.0283		0.0505	0.0558	0.0431	0.0387	0.0362	0.0437	0.0409	0.0302		0.0501	0.0546	0.046	0.039	0.0358	0.0444	0.0404	0.0325		0.026	0.0265	0.029	0.0232	0.0206	0.0285	0.0253	0.0246			0.0509	0.0559
34	0.0541629	0.0652757	0.0299714	0.0355771	0.0382514	0.0497514	0.03684	0.0307729		34	0.051	0.057	0.0403	0.0384	0.0358	0.0442	0.0419	0.0247		0.0502	0.0554	0.0429	0.0385	0.0361	0.0436	0.0408	0.0295		0.0498	0.0542	0.0458	0.0388	0.0356	0.0442	0.0402	0.0324		0.026	0.0264	0.0289	0.0231	0.0205	0.0284	0.0252	0.0245			0.0506	0.0556
34.2	0.0551629	0.0636257	0.0301714	0.0309271	0.0388514	0.0450014	0.03794	0.0307229		34.2	0.0508	0.0567	0.0403	0.0385	0.0356	0.0439	0.042	0.0248		0.0499	0.055	0.0427	0.0384	0.0359	0.0434	0.0406	0.0301		0.0495	0.0539	0.0455	0.0387	0.0354	0.044	0.0401	0.0322		0.0259	0.0263	0.0288	0.023	0.0204	0.0283	0.0251	0.0244			0.0503	0.0552
34.4	0.0548629	0.0655757	0.0303714	0.0374271	0.0374014	0.0445014	0.03374	0.0291229		34.4	0.0505	0.0566	0.0404	0.0384	0.0355	0.0436	0.0421	0.0259		0.0496	0.0548	0.0425	0.0382	0.0358	0.0432	0.0405	0.0304		0.0492	0.0536	0.0453	0.0385	0.0353	0.0438	0.0399	0.032		0.0258	0.0262	0.0287	0.0229	0.0203	0.0282	0.025	0.0242			0.0501	0.055
34.6	0.0550129	0.0631757	0.0311214	0.0326271	0.0372514	0.0447514	0.03194	0.0299729		34.6	0.0503	0.0566	0.0402	0.0382	0.0353	0.0435	0.0419	0.027		0.0494	0.0548	0.0423	0.038	0.0355	0.043	0.0403	0.0305		0.049	0.0536	0.0451	0.0382	0.0351	0.0436	0.0397	0.0319		0.0257	0.0262	0.0286	0.0229	0.0202	0.0281	0.0249	0.0241			0.0499	0.055
34.8	0.0531629	0.0652257	0.0308714	0.0383271	0.0377014	0.0539514	0.03489	0.0282729		34.8	0.0502	0.0566	0.0401	0.0379	0.0352	0.0435	0.0416	0.0236		0.0494	0.0549	0.0423	0.0378	0.0353	0.0428	0.0402	0.0303		0.049	0.0538	0.045	0.038	0.0348	0.0434	0.0395	0.0317		0.0257	0.0261	0.0286	0.0228	0.0201	0.0281	0.0248	0.024			0.0499	0.0551
35	0.0545629	0.0678257	0.0329714	0.0346771	0.0368514	0.0467514	0.03669	0.0280729		35	0.0503	0.0567	0.04	0.0376	0.0352	0.0434	0.0412	0.0257		0.0495	0.055	0.0422	0.0376	0.0351	0.0426	0.04	0.0301		0.049	0.0539	0.0449	0.0378	0.0346	0.0432	0.0393	0.0315		0.0256	0.026	0.0285	0.0227	0.0201	0.028	0.0248	0.024			0.0499	0.0552
35.2	0.0557629	0.0626757	0.0309214	0.0354271	0.0386014	0.0455014	0.03559	0.0256229		35.2	0.0503	0.0569	0.04	0.0375	0.0352	0.0432	0.041	0.0251		0.0496	0.0552	0.0421	0.0374	0.0349	0.0425	0.0398	0.03		0.0491	0.0541	0.0449	0.0377	0.0344	0.0431	0.0391	0.0313		0.0255	0.0259	0.0284	0.0226	0.02	0.0279	0.0247	0.0239			0.05	0.0554
35.4	0.0536629	0.0619257	0.0350214	0.0398771	0.0375514	0.0432014	0.03454	0.0277229		35.4	0.0503	0.0569	0.04	0.0375	0.0353	0.0431	0.0412	0.0222		0.0497	0.0552	0.0421	0.0374	0.0348	0.0425	0.0396	0.0301		0.0492	0.054	0.045	0.0377	0.0343	0.0431	0.039	0.0311		0.0254	0.0258	0.0283	0.0225	0.0199	0.0278	0.0246	0.0238			0.0502	0.0554
35.6	0.0517629	0.0679257	0.0303214	0.0339271	0.0410514	0.0460514	0.03469	0.0288729		35.6	0.0504	0.0568	0.0399	0.0375	0.0352	0.0431	0.0414	0.025		0.0497	0.055	0.0421	0.0374	0.0348	0.0425	0.0395	0.0302		0.049	0.0537	0.0449	0.0377	0.0342	0.0431	0.0389	0.0309		0.0253	0.0257	0.0282	0.0224	0.0198	0.0277	0.0245	0.0237			0.0502	0.0552
35.8	0.0495129	0.0627757	0.0331714	0.0349271	0.0406514	0.0483514	0.03474	0.0283229		35.8	0.0502	0.0565	0.0398	0.0375	0.0349	0.0433	0.0414	0.0272		0.0494	0.0547	0.042	0.0374	0.0348	0.0425	0.0395	0.03		0.0487	0.0533	0.0448	0.0377	0.0342	0.0431	0.0389	0.0308		0.0252	0.0257	0.0282	0.0224	0.0197	0.0277	0.0244	0.0236			0.0499	0.0548
36	0.0513129	0.0647257	0.0341714	0.0306271	0.0381014	0.0537514	0.03324	0.0252729		36	0.0499	0.056	0.0395	0.0375	0.0346	0.0435	0.0411	0.0249		0.0491	0.0543	0.0419	0.0373	0.0347	0.0425	0.0395	0.0297		0.0482	0.0529	0.0445	0.0377	0.0342	0.0431	0.0389	0.0307		0.0252	0.0256	0.0281	0.0223	0.0197	0.0276	0.0243	0.0235			0.0496	0.0545
36.2	0.0516629	0.0636257	0.0324214	0.0356271	0.0345014	0.0519514	0.03644	0.0281229		36.2	0.0496	0.0556	0.0394	0.0374	0.0345	0.0433	0.0408	0.022		0.0488	0.0539	0.0417	0.0372	0.0347	0.0424	0.0394	0.0292		0.0477	0.0524	0.0443	0.0375	0.0342	0.0429	0.0389	0.0306		0.0251	0.0255	0.028	0.0222	0.0196	0.0275	0.0243	0.0234			0.0492	0.0541
36.4	0.0511629	0.0647757	0.0313714	0.0320771	0.0333514	0.0427514	0.03569	0.0279229		36.4	0.0492	0.0551	0.0393	0.0374	0.0345	0.0429	0.0405	0.0246		0.0484	0.0535	0.0415	0.0371	0.0345	0.0422	0.0394	0.0285		0.0473	0.0521	0.044	0.0373	0.034	0.0427	0.0388	0.0305		0.025	0.0255	0.028	0.0221	0.0195	0.0274	0.0242	0.0234			0.0488	0.0537
36.6	0.0540129	0.0656257	0.0291214	0.0359771	0.0377514	0.0467514	0.03684	0.0275229		36.6	0.0489	0.0549	0.0391	0.0372	0.0344	0.0426	0.0403	0.0249		0.0481	0.0534	0.0412	0.0369	0.0343	0.0419	0.0392	0.0281		0.0471	0.052	0.0437	0.037	0.0337	0.0424	0.0387	0.0303		0.025	0.0254	0.0279	0.0221	0.0194	0.0274	0.0241	0.0233			0.0485	0.0535
36.8	0.0527629	0.0627257	0.0317214	0.0354771	0.0379514	0.0501514	0.03554	0.0256229		36.8	0.0486	0.0547	0.0389	0.037	0.0342	0.0423	0.0404	0.0236		0.048	0.0533	0.0411	0.0366	0.0341	0.0417	0.039	0.0278		0.047	0.0519	0.0435	0.0367	0.0334	0.0422	0.0384	0.0302		0.0249	0.0253	0.0278	0.022	0.0194	0.0273	0.0241	0.0232			0.0485	0.0534
37	0.0525629	0.0611257	0.0303214	0.0297771	0.0395514	0.0487014	0.03369	0.0268229		37	0.0486	0.0546	0.0387	0.0366	0.0339	0.0421	0.0404	0.0243		0.048	0.0532	0.041	0.0364	0.0339	0.0415	0.0388	0.0275		0.047	0.0519	0.0435	0.0364	0.0331	0.042	0.0381	0.03		0.0248	0.0252	0.0277	0.0219	0.0193	0.0272	0.024	0.0231			0.0484	0.0534
37.2	0.0549629	0.0626757	0.0289214	0.0399271	0.0336514	0.0474514	0.03389	0.0290729		37.2	0.0485	0.0546	0.0385	0.0363	0.0336	0.0418	0.0401	0.0259		0.0479	0.0532	0.0408	0.0362	0.0338	0.0414	0.0386	0.0277		0.0471	0.0519	0.0434	0.0362	0.0329	0.0418	0.0379	0.0298		0.0247	0.0252	0.0277	0.0219	0.0192	0.0272	0.0239	0.0231			0.0484	0.0533
37.4	0.0527129	0.0641257	0.0289214	0.0313271	0.0328014	0.0444514	0.03289	0.0293229		37.4	0.0484	0.0546	0.0384	0.0362	0.0335	0.0416	0.0397	0.026		0.048	0.0531	0.0408	0.0361	0.0337	0.0413	0.0385	0.0271		0.0471	0.0518	0.0434	0.0361	0.0327	0.0418	0.0376	0.0297		0.0247	0.0251	0.0276	0.0218	0.0192	0.0271	0.0238	0.023			0.0484	0.0533
37.6	0.0521629	0.0658257	0.0278714	0.0349771	0.0351514	0.0478014	0.03574	0.0255729		37.6	0.0484	0.0546	0.0384	0.0362	0.0335	0.0416	0.0394	0.0201		0.0479	0.053	0.0407	0.0361	0.0336	0.0413	0.0384	0.0266		0.0469	0.0515	0.0433	0.0361	0.0327	0.0417	0.0375	0.0295		0.0246	0.025	0.0275	0.0217	0.0191	0.027	0.0238	0.0229			0.0483	0.0532
37.8	0.0523629	0.0648757	0.0281714	0.0354271	0.0347514	0.0482014	0.02984	0.0270229		37.8	0.0483	0.0545	0.0385	0.0362	0.0336	0.0418	0.0396	0.0235		0.0476	0.0527	0.0406	0.036	0.0336	0.0412	0.0383	0.0262		0.0465	0.0512	0.0431	0.0362	0.0326	0.0417	0.0375	0.0293		0.0245	0.0249	0.0274	0.0216	0.019	0.0269	0.0237	0.0228			0.0481	0.053
38	0.0523129	0.0597757	0.0307214	0.0312271	0.0330014	0.0491014	0.03324	0.0269229		38	0.0483	0.0543	0.0386	0.0362	0.0335	0.0419	0.0398	0.0248		0.0473	0.0525	0.0405	0.036	0.0335	0.0412	0.0383	0.026		0.0461	0.0509	0.0429	0.0361	0.0326	0.0416	0.0375	0.0292		0.0244	0.0248	0.0273	0.0215	0.0189	0.0269	0.0236	0.0228			0.0478	0.0528
38.2	0.0518629	0.0624757	0.0325214	0.0364771	0.0344514	0.0449514	0.03274	0.0275229		38.2	0.0481	0.054	0.0384	0.0361	0.0334	0.0418	0.0398	0.0214		0.047	0.0523	0.0404	0.0359	0.0334	0.0411	0.0382	0.0259		0.0457	0.0506	0.0427	0.036	0.0325	0.0415	0.0375	0.0291		0.0243	0.0247	0.0273	0.0215	0.0189	0.0268	0.0235	0.0227			0.0475	0.0525
38.4	0.0513629	0.0618257	0.0311714	0.0320271	0.0362514	0.0450514	0.03429	0.0299229		38.4	0.0479	0.0537	0.0382	0.0358	0.0332	0.0415	0.0394	0.0231		0.0468	0.052	0.0403	0.0357	0.0332	0.0409	0.0381	0.0263		0.0454	0.0503	0.0425	0.0358	0.0323	0.0413	0.0374	0.029		0.0243	0.0247	0.0272	0.0214	0.0188	0.0267	0.0235	0.0226			0.0473	0.0523
38.6	0.0512129	0.0631257	0.0299214	0.0336771	0.0388014	0.0462514	0.03479	0.0286229		38.6	0.0477	0.0535	0.0381	0.0357	0.0331	0.0413	0.039	0.0245		0.0466	0.0517	0.0401	0.0355	0.033	0.0407	0.038	0.0265		0.0451	0.05	0.0422	0.0355	0.0321	0.041	0.0373	0.0289		0.0242	0.0246	0.0271	0.0213	0.0187	0.0266	0.0234	0.0225			0.0471	0.052
38.8	0.0496629	0.0630757	0.0321714	0.0331771	0.0388514	0.0469014	0.02974	0.0293229		38.8	0.0475	0.0532	0.038	0.0356	0.0331	0.0411	0.0389	0.0245		0.0464	0.0514	0.0399	0.0353	0.0328	0.0405	0.0378	0.0265		0.0448	0.0497	0.042	0.0352	0.0319	0.0408	0.037	0.0288		0.0241	0.0246	0.0271	0.0213	0.0186	0.0266	0.0233	0.0225			0.0469	0.0517
39	0.0498629	0.0628257	0.0314214	0.0330771	0.0350014	0.0460514	0.04094	0.0281229		39	0.0473	0.053	0.0379	0.0355	0.0329	0.041	0.0391	0.0223		0.0462	0.0511	0.0397	0.0352	0.0326	0.0404	0.0376	0.0257		0.0447	0.0495	0.0419	0.035	0.0316	0.0406	0.0368	0.0287		0.0241	0.0245	0.027	0.0212	0.0186	0.0265	0.0233	0.0224			0.0467	0.0514
39.2	0.0486629	0.0612257	0.0295714	0.0327771	0.0369514	0.0438014	0.02899	0.0265729		39.2	0.0471	0.0527	0.0377	0.0355	0.0327	0.0409	0.0392	0.0244		0.046	0.0509	0.0396	0.035	0.0326	0.0402	0.0375	0.0248		0.0445	0.0492	0.0417	0.0348	0.0315	0.0404	0.0366	0.0286		0.0241	0.0245	0.027	0.0211	0.0185	0.0265	0.0232	0.0223			0.0465	0.0511
39.4	0.0514629	0.0609757	0.0294714	0.0283271	0.0346014	0.0466014	0.03264	0.0277229		39.4	0.0468	0.0526	0.0375	0.0353	0.0324	0.0407	0.039	0.0263		0.0458	0.0507	0.0394	0.0349	0.0325	0.0401	0.0375	0.0249		0.0444	0.049	0.0415	0.0346	0.0313	0.0403	0.0364	0.0285		0.024	0.0245	0.0269	0.0211	0.0185	0.0264	0.0231	0.0223			0.0462	0.0509
39.6	0.0513129	0.0649757	0.0311214	0.0360771	0.0328014	0.0461014	0.02884	0.0253229		39.6	0.0466	0.0525	0.0374	0.0352	0.0323	0.0405	0.0387	0.024		0.0456	0.0507	0.0393	0.0348	0.0324	0.04	0.0374	0.0248		0.0442	0.049	0.0413	0.0345	0.0311	0.0402	0.0362	0.0284		0.024	0.0244	0.0269	0.021	0.0184	0.0264	0.0231	0.0222			0.046	0.051
39.8	0.0522629	0.0593257	0.0288714	0.0292771	0.0308014	0.0430514	0.03239	0.0275729		39.8	0.0464	0.0526	0.0374	0.035	0.0323	0.0405	0.0384	0.0206		0.0455	0.051	0.0392	0.0347	0.0323	0.0398	0.0372	0.0247		0.0442	0.0492	0.0412	0.0344	0.031	0.04	0.0361	0.0283		0.0239	0.0244	0.0268	0.021	0.0184	0.0263	0.023	0.0222			0.046	0.0511
40	0.0506129	0.0638257	0.0299214	0.0319771	0.0334014	0.0424014	0.03339	0.0261229		40	0.0465	0.0527	0.0375	0.035	0.0323	0.0405	0.0382	0.023		0.0456	0.0512	0.0392	0.0345	0.0321	0.0397	0.0371	0.025		0.0442	0.0494	0.0412	0.0343	0.0308	0.0399	0.036	0.0281		0.0239	0.0243	0.0268	0.0209	0.0183	0.0263	0.023	0.0221			0.0461	0.0514
40.2	0.0487629	0.0625257	0.0305714	0.0319271	0.0348514	0.0427514	0.03199	0.0269229		40.2	0.0467	0.0528	0.0374	0.0349	0.0322	0.0404	0.0382	0.0252		0.0457	0.0514	0.0391	0.0344	0.0319	0.0396	0.0368	0.0254		0.0443	0.0497	0.0412	0.0341	0.0306	0.0398	0.0359	0.028		0.0238	0.0242	0.0267	0.0209	0.0182	0.0262	0.0229	0.022			0.0462	0.0516
40.4	0.0516629	0.0630757	0.0273714	0.0303771	0.0363514	0.0476514	0.03319	0.0279229		40.4	0.0468	0.053	0.0372	0.0348	0.0321	0.0402	0.0382	0.0239		0.0459	0.0515	0.0391	0.0343	0.0317	0.0396	0.0367	0.0258		0.0444	0.0498	0.0413	0.0341	0.0305	0.0397	0.0357	0.0278		0.0237	0.0242	0.0267	0.0208	0.0182	0.0261	0.0229	0.022			0.0464	0.0517
40.6	0.0490629	0.0622757	0.0303214	0.0348271	0.0328514	0.0401014	0.02919	0.0247229		40.6	0.047	0.0529	0.0371	0.0347	0.0319	0.0401	0.0381	0.0221		0.046	0.0514	0.0391	0.0343	0.0316	0.0396	0.0366	0.026		0.0444	0.0496	0.0413	0.0341	0.0304	0.0397	0.0356	0.0277		0.0237	0.0241	0.0266	0.0208	0.0181	0.0261	0.0228	0.0219			0.0465	0.0516
40.8	0.0503629	0.0608257	0.0292214	0.0303271	0.0356514	0.0465514	0.03184	0.0254229		40.8	0.047	0.0527	0.037	0.0346	0.0319	0.0402	0.0379	0.0236		0.0459	0.051	0.0391	0.0343	0.0317	0.0396	0.0365	0.0257		0.0442	0.0492	0.0412	0.0341	0.0304	0.0397	0.0356	0.0276		0.0236	0.024	0.0265	0.0207	0.0181	0.026	0.0228	0.0219			0.0463	0.0513
41	0.0490129	0.0596757	0.0309714	0.0320271	0.0339514	0.0429014	0.02929	0.0256229		41	0.0469	0.0525	0.037	0.0346	0.0319	0.0404	0.0379	0.0244		0.0456	0.0507	0.039	0.0343	0.0317	0.0396	0.0366	0.0256		0.0438	0.0488	0.041	0.0341	0.0304	0.0398	0.0356	0.0275		0.0235	0.0239	0.0265	0.0206	0.018	0.026	0.0227	0.0218			0.0461	0.0509
41.2	0.0494129	0.0617757	0.0306214	0.0294271	0.0345014	0.0454514	0.03449	0.0285229		41.2	0.0467	0.0522	0.0371	0.0346	0.0319	0.0405	0.0381	0.0201		0.0453	0.0503	0.0389	0.0343	0.0317	0.0396	0.0367	0.0244		0.0434	0.0483	0.0408	0.0341	0.0305	0.0397	0.0356	0.0275		0.0234	0.0239	0.0264	0.0206	0.018	0.0259	0.0227	0.0218			0.0458	0.0506
41.4	0.0504129	0.0595757	0.0294714	0.0307771	0.0358514	0.0458014	0.03064	0.0252729		41.4	0.0464	0.0518	0.0371	0.0347	0.032	0.0403	0.0383	0.022		0.0449	0.0499	0.0388	0.0342	0.0318	0.0395	0.0367	0.0241		0.043	0.0479	0.0406	0.0339	0.0304	0.0395	0.0356	0.0274		0.0234	0.0238	0.0263	0.0205	0.0179	0.0258	0.0226	0.0217			0.0454	0.0502
41.6	0.0482129	0.0614257	0.0266714	0.0315771	0.0367014	0.0417014	0.03189	0.0243229		41.6	0.046	0.0515	0.0369	0.0347	0.0319	0.04	0.0383	0.0243		0.0446	0.0497	0.0385	0.034	0.0316	0.0393	0.0367	0.0241		0.0427	0.0476	0.0403	0.0337	0.0303	0.0393	0.0356	0.0274		0.0233	0.0237	0.0262	0.0204	0.0178	0.0258	0.0225	0.0216			0.0451	0.0499
41.8	0.0491129	0.0576257	0.0272714	0.0327771	0.0367014	0.0449014	0.03069	0.0259229		41.8	0.0456	0.0512	0.0367	0.0346	0.0317	0.0398	0.0381	0.0247		0.0444	0.0496	0.0383	0.0339	0.0314	0.0391	0.0365	0.0238		0.0425	0.0475	0.0401	0.0334	0.03	0.0391	0.0354	0.0273		0.0232	0.0236	0.0262	0.0204	0.0178	0.0257	0.0225	0.0216			0.0449	0.0498
42	0.0467629	0.0611257	0.0289714	0.0306271	0.0369514	0.0461014	0.03074	0.0266229		42	0.0454	0.051	0.0365	0.0342	0.0316	0.0397	0.0378	0.0197		0.0443	0.0494	0.0382	0.0337	0.0312	0.0389	0.0363	0.0235		0.0424	0.0473	0.0399	0.0331	0.0298	0.0389	0.0352	0.0272		0.0231	0.0235	0.0261	0.0203	0.0177	0.0256	0.0224	0.0215			0.0448	0.0496
42.2	0.0496629	0.0588257	0.0280214	0.0305271	0.0362014	0.0452514	0.03129	0.0245729		42.2	0.0452	0.0508	0.0364	0.0339	0.0314	0.0396	0.0375	0.0221		0.0442	0.0492	0.0381	0.0335	0.031	0.0388	0.0361	0.0234		0.0423	0.0472	0.0398	0.0329	0.0295	0.0387	0.0349	0.027		0.023	0.0234	0.026	0.0202	0.0176	0.0256	0.0223	0.0215			0.0447	0.0494
42.4	0.0474629	0.0618757	0.0287214	0.0317271	0.0356514	0.0414014	0.02929	0.0246229		42.4	0.0452	0.0507	0.0364	0.0337	0.0312	0.0395	0.0373	0.0238		0.0441	0.049	0.0379	0.0333	0.0308	0.0387	0.0358	0.0236		0.0422	0.0471	0.0397	0.0327	0.0293	0.0386	0.0347	0.0268		0.0229	0.0233	0.0259	0.0201	0.0175	0.0255	0.0223	0.0214			0.0445	0.0492
42.6	0.0486629	0.0567257	0.0305714	0.0273771	0.0321514	0.0415514	0.03214	0.0245229		42.6	0.0451	0.0505	0.0362	0.0336	0.0311	0.0392	0.0372	0.0222		0.0439	0.0488	0.0378	0.0332	0.0307	0.0386	0.0356	0.0239		0.0421	0.0468	0.0396	0.0326	0.0291	0.0385	0.0345	0.0266		0.0229	0.0233	0.0258	0.0201	0.0175	0.0254	0.0222	0.0213			0.0444	0.049
42.8	0.0461129	0.0598257	0.0276214	0.0344271	0.0323514	0.0472014	0.02909	0.0240729		42.8	0.045	0.0503	0.036	0.0336	0.031	0.0391	0.0372	0.0215		0.0437	0.0486	0.0377	0.0331	0.0306	0.0385	0.0355	0.0242		0.0419	0.0466	0.0395	0.0326	0.029	0.0384	0.0343	0.0264		0.0228	0.0232	0.0258	0.02	0.0174	0.0253	0.0221	0.0212			0.0442	0.0488
43	0.0459129	0.0586257	0.0279714	0.0283271	0.0356514	0.0450514	0.02839	0.0246229		43	0.0448	0.0501	0.0359	0.0335	0.0308	0.039	0.0372	0.023		0.0434	0.0483	0.0376	0.033	0.0305	0.0383	0.0355	0.0243		0.0415	0.0463	0.0393	0.0325	0.0289	0.0383	0.0342	0.0263		0.0227	0.0231	0.0257	0.0199	0.0173	0.0253	0.022	0.0212			0.0439	0.0485
43.2	0.0473129	0.0589257	0.0271714	0.0285271	0.0331514	0.0428514	0.02789	0.0226729		43.2	0.0446	0.0498	0.0358	0.0334	0.0306	0.0391	0.0371	0.0242		0.0432	0.0481	0.0375	0.0329	0.0303	0.0382	0.0354	0.0241		0.0412	0.046	0.0391	0.0324	0.0288	0.0381	0.0342	0.0262		0.0226	0.023	0.0256	0.0198	0.0173	0.0252	0.022	0.0211			0.0436	0.0483
43.4	0.0485629	0.0584257	0.0314714	0.0324771	0.0332514	0.0459514	0.03494	0.0271729		43.4	0.0444	0.0495	0.0359	0.0332	0.0305	0.0391	0.0369	0.0215		0.0429	0.0478	0.0373	0.0327	0.0302	0.038	0.0353	0.0244		0.0408	0.0457	0.0389	0.0322	0.0287	0.038	0.0341	0.0261		0.0226	0.023	0.0256	0.0198	0.0172	0.0251	0.0219	0.021			0.0434	0.0481
43.6	0.0456129	0.0577257	0.0275714	0.0292771	0.0324514	0.0452014	0.02939	0.0260729		43.6	0.0442	0.0493	0.0358	0.0332	0.0304	0.0389	0.0367	0.0208		0.0427	0.0477	0.0372	0.0326	0.03	0.0378	0.0352	0.0233		0.0405	0.0456	0.0386	0.032	0.0285	0.0378	0.034	0.026		0.0225	0.0229	0.0255	0.0197	0.0171	0.0251	0.0218	0.021			0.0431	0.0479
43.8	0.0480629	0.0585757	0.0268714	0.0309271	0.0306514	0.0487014	0.02849	0.0252229		43.8	0.044	0.0492	0.0357	0.0332	0.0304	0.0385	0.0365	0.0217		0.0425	0.0476	0.037	0.0324	0.0299	0.0377	0.035	0.0238		0.0403	0.0455	0.0385	0.0318	0.0283	0.0375	0.0338	0.0259		0.0224	0.0228	0.0254	0.0196	0.017	0.025	0.0218	0.0209			0.043	0.0478
44	0.0465629	0.0583257	0.0288214	0.0262771	0.0333014	0.0491514	0.03434	0.0224729		44	0.0439	0.0491	0.0355	0.0331	0.0304	0.0382	0.0363	0.023		0.0425	0.0475	0.037	0.0323	0.0298	0.0375	0.0348	0.024		0.0402	0.0455	0.0383	0.0315	0.0281	0.0373	0.0336	0.0258		0.0223	0.0227	0.0253	0.0196	0.017	0.0249	0.0217	0.0208			0.0429	0.0477
44.2	0.0467629	0.0595257	0.0273214	0.0303271	0.0293514	0.0465014	0.02574	0.0225729		44.2	0.0438	0.0492	0.0354	0.0329	0.0302	0.0381	0.0362	0.0242		0.0425	0.0475	0.0369	0.0321	0.0296	0.0374	0.0346	0.0233		0.0403	0.0455	0.0382	0.0313	0.0279	0.0372	0.0334	0.0257		0.0223	0.0227	0.0253	0.0195	0.0169	0.0248	0.0216	0.0208			0.0429	0.0477
44.4	0.0488129	0.0557257	0.0312714	0.0274271	0.0353514	0.0419514	0.03114	0.0243229		44.4	0.0437	0.0493	0.0353	0.0327	0.0299	0.0381	0.0361	0.0225		0.0425	0.0475	0.0368	0.032	0.0294	0.0373	0.0345	0.0212		0.0403	0.0454	0.0382	0.0312	0.0277	0.037	0.0332	0.0257		0.0222	0.0226	0.0252	0.0194	0.0168	0.0248	0.0216	0.0207			0.0429	0.0477
44.6	0.0465629	0.0572257	0.0300214	0.0321771	0.0320514	0.0461014	0.02649	0.0241729		44.6	0.0437	0.0492	0.0354	0.0325	0.0297	0.0381	0.036	0.0196		0.0424	0.0475	0.0367	0.0319	0.0293	0.0372	0.0344	0.0203		0.0403	0.0453	0.0381	0.0311	0.0276	0.037	0.0331	0.0256		0.0221	0.0224	0.0251	0.0193	0.0168	0.0247	0.0215	0.0206			0.0429	0.0476
44.8	0.0478629	0.0608757	0.0291214	0.0306771	0.0334514	0.0487014	0.03209	0.0272729		44.8	0.0436	0.0491	0.0354	0.0325	0.0297	0.0379	0.036	0.0222		0.0423	0.0473	0.0366	0.0319	0.0293	0.0372	0.0344	0.021		0.0402	0.0451	0.038	0.0311	0.0276	0.037	0.033	0.0255		0.022	0.0223	0.025	0.0193	0.0167	0.0246	0.0214	0.0206			0.0428	0.0475
45	0.0458129	0.0612757	0.0294714	0.0255271	0.0277514	0.0466014	0.02974	0.0239229		45	0.0434	0.0489	0.0353	0.0326	0.0298	0.0378	0.036	0.0233		0.0421	0.0471	0.0366	0.0319	0.0293	0.0371	0.0344	0.0213		0.04	0.0449	0.0379	0.0311	0.0276	0.0369	0.033	0.0254		0.0218	0.0222	0.0249	0.0192	0.0166	0.0245	0.0213	0.0205			0.0426	0.0473
45.2	0.0457129	0.0605757	0.0289714	0.0309271	0.0320514	0.0399514	0.02794	0.0267729		45.2	0.0433	0.0486	0.0351	0.0327	0.0299	0.0378	0.036	0.0223		0.0419	0.0469	0.0365	0.0318	0.0292	0.0371	0.0343	0.0214		0.0397	0.0447	0.0378	0.0311	0.0275	0.0369	0.033	0.0253		0.0217	0.0221	0.0248	0.0191	0.0165	0.0244	0.0212	0.0204			0.0423	0.0471
45.4	0.0478129	0.0573257	0.0303714	0.0265271	0.0309014	0.0453014	0.03009	0.0255729		45.4	0.0431	0.0483	0.035	0.0325	0.0299	0.0379	0.036	0.0209		0.0416	0.0467	0.0364	0.0318	0.0292	0.0371	0.0343	0.0212		0.0394	0.0443	0.0377	0.031	0.0274	0.0368	0.0329	0.0252		0.0216	0.022	0.0247	0.019	0.0164	0.0243	0.0212	0.0203			0.0421	0.0468
45.6	0.0465629	0.0601757	0.0276214	0.0290271	0.0342014	0.0484514	0.03014	0.0235729		45.6	0.0429	0.0479	0.0349	0.0323	0.0297	0.038	0.0358	0.0226		0.0414	0.0463	0.0362	0.0316	0.0291	0.0369	0.0342	0.0207		0.0391	0.0439	0.0375	0.0308	0.0273	0.0367	0.0329	0.0251		0.0215	0.0219	0.0246	0.0189	0.0163	0.0242	0.0211	0.0202			0.0418	0.0465
45.8	0.0457129	0.0547757	0.0292214	0.0316271	0.0346514	0.0436514	0.02954	0.0258229		45.8	0.0428	0.0475	0.0348	0.032	0.0294	0.0379	0.0356	0.0233		0.0412	0.0458	0.036	0.0314	0.0289	0.0368	0.034	0.0202		0.0387	0.0435	0.0373	0.0306	0.0271	0.0365	0.0327	0.025		0.0214	0.0218	0.0245	0.0188	0.0162	0.0241	0.021	0.0202			0.0416	0.046
46	0.0483129	0.0565257	0.0274214	0.0275271	0.0301514	0.0417514	0.03054	0.0260729		46	0.0426	0.0471	0.0346	0.0318	0.0293	0.0375	0.0354	0.0188		0.0408	0.0453	0.0358	0.0313	0.0287	0.0366	0.0339	0.02		0.0384	0.043	0.037	0.0304	0.0269	0.0363	0.0326	0.0249		0.0214	0.0218	0.0244	0.0187	0.0161	0.0241	0.0209	0.0201			0.0413	0.0456
46.2	0.0469629	0.0621757	0.0286714	0.0270271	0.0349014	0.0418514	0.02774	0.0243229		46.2	0.0423	0.0467	0.0343	0.0317	0.0292	0.0372	0.0352	0.0202		0.0405	0.0448	0.0355	0.0311	0.0285	0.0365	0.0337	0.02		0.038	0.0425	0.0367	0.0302	0.0268	0.0361	0.0324	0.0247		0.0213	0.0217	0.0243	0.0186	0.0161	0.024	0.0208	0.02			0.0409	0.0451
46.4	0.0442629	0.0553257	0.0291214	0.0304271	0.0314014	0.0485014	0.02914	0.0252729		46.4	0.0419	0.0462	0.0341	0.0318	0.0292	0.0369	0.0352	0.0229		0.0401	0.0443	0.0353	0.031	0.0284	0.0363	0.0336	0.0201		0.0376	0.042	0.0364	0.0299	0.0266	0.0358	0.0322	0.0246		0.0213	0.0217	0.0243	0.0185	0.016	0.0239	0.0207	0.0199			0.0405	0.0445
46.6	0.0468129	0.0599257	0.0301714	0.0261271	0.0314014	0.0454514	0.02894	0.0228729		46.6	0.0415	0.046	0.0341	0.0317	0.029	0.0369	0.0353	0.0235		0.0397	0.0439	0.0352	0.0308	0.0283	0.036	0.0335	0.0204		0.0372	0.0417	0.0361	0.0297	0.0264	0.0356	0.032	0.0245		0.0212	0.0216	0.0242	0.0185	0.0159	0.0238	0.0207	0.0198			0.0401	0.0442
46.8	0.0451629	0.0569757	0.0304214	0.0292771	0.0307514	0.0422514	0.03109	0.0214229		46.8	0.0411	0.0459	0.034	0.0315	0.0288	0.0368	0.0353	0.0196		0.0393	0.044	0.0349	0.0305	0.0282	0.0358	0.0334	0.0214		0.0369	0.0418	0.0358	0.0294	0.0262	0.0354	0.0318	0.0244		0.0212	0.0216	0.0242	0.0184	0.0159	0.0238	0.0206	0.0198			0.0397	0.0442
47	0.0470129	0.0546257	0.0283714	0.0255771	0.0290014	0.0427514	0.02979	0.0257729		47	0.0409	0.0461	0.034	0.0313	0.0286	0.0366	0.0351	0.0203		0.0393	0.0443	0.0348	0.0303	0.028	0.0356	0.0332	0.0221		0.0369	0.0422	0.0357	0.0292	0.0259	0.0352	0.0316	0.0243		0.0211	0.0216	0.0242	0.0184	0.0158	0.0237	0.0205	0.0197			0.0397	0.0445
47.2	0.0455129	0.0554257	0.0296714	0.0312771	0.0289014	0.0442014	0.02639	0.0244229		47.2	0.0409	0.0464	0.0339	0.031	0.0284	0.0364	0.0347	0.0221		0.0395	0.0448	0.0348	0.0301	0.0277	0.0354	0.033	0.0224		0.0372	0.0427	0.0357	0.029	0.0257	0.0349	0.0314	0.0241		0.0211	0.0215	0.0241	0.0183	0.0158	0.0237	0.0205	0.0196			0.0399	0.0449
47.4	0.0476129	0.0546257	0.0284214	0.0290271	0.0315014	0.0433014	0.02864	0.0250229		47.4	0.041	0.0467	0.0338	0.0309	0.0283	0.0361	0.0343	0.0222		0.0397	0.0453	0.0348	0.0299	0.0275	0.0352	0.0328	0.0228		0.0376	0.0432	0.0359	0.0288	0.0254	0.0348	0.0311	0.0239		0.021	0.0214	0.0241	0.0183	0.0157	0.0236	0.0204	0.0196			0.0402	0.0454
47.6	0.0437129	0.0579757	0.0309714	0.0255271	0.0331014	0.0472014	0.02744	0.0250229		47.6	0.0413	0.047	0.0337	0.0308	0.0281	0.036	0.034	0.0199		0.0402	0.0456	0.0348	0.0299	0.0273	0.0351	0.0325	0.0229		0.0379	0.0435	0.036	0.0287	0.0252	0.0347	0.0309	0.0238		0.021	0.0214	0.024	0.0182	0.0156	0.0236	0.0204	0.0195			0.0406	0.0457
47.8	0.0464129	0.0557257	0.0277714	0.0311771	0.0390014	0.0444014	0.02629	0.0254729		47.8	0.0416	0.0471	0.0337	0.0308	0.028	0.0361	0.0339	0.0208		0.0404	0.0456	0.0349	0.0299	0.0272	0.0352	0.0323	0.0226		0.0381	0.0434	0.0362	0.0289	0.0251	0.0348	0.0307	0.0237		0.0209	0.0213	0.0239	0.0182	0.0156	0.0235	0.0203	0.0194			0.0408	0.0458
48	0.0445629	0.0524757	0.0275214	0.0268271	0.0294014	0.0440014	0.03274	0.0238729		48	0.0418	0.0471	0.0337	0.0308	0.0279	0.0363	0.0339	0.022		0.0404	0.0455	0.0349	0.03	0.0272	0.0354	0.0323	0.0229		0.0381	0.0433	0.0362	0.0291	0.0252	0.035	0.0307	0.0235		0.0208	0.0211	0.0238	0.0181	0.0155	0.0235	0.0203	0.0194			0.0408	0.0456
48.2	0.0455129	0.0571257	0.0256714	0.0269771	0.0323514	0.0438014	0.02619	0.0259729		48.2	0.0418	0.0469	0.0338	0.0307	0.0278	0.0364	0.0339	0.0231		0.0403	0.0453	0.0349	0.0302	0.0274	0.0355	0.0323	0.022		0.0378	0.0431	0.0362	0.0293	0.0254	0.0351	0.0308	0.0235		0.0207	0.021	0.0237	0.018	0.0155	0.0234	0.0202	0.0193			0.0406	0.0455
48.4	0.0435129	0.0540257	0.0278214	0.0323271	0.0305014	0.0444014	0.02654	0.0256229		48.4	0.0417	0.0467	0.0339	0.0307	0.0279	0.0364	0.034	0.0187		0.0401	0.045	0.035	0.0302	0.0275	0.0356	0.0325	0.0213		0.0376	0.0427	0.0361	0.0293	0.0255	0.0351	0.031	0.0235		0.0206	0.0209	0.0236	0.0179	0.0154	0.0233	0.0201	0.0193			0.0405	0.0452
48.6	0.0443629	0.0534257	0.0294214	0.0246271	0.0280514	0.0409514	0.02674	0.0258229		48.6	0.0415	0.0463	0.0338	0.0307	0.028	0.0363	0.034	0.0196		0.0398	0.0447	0.0349	0.0301	0.0276	0.0355	0.0326	0.0216		0.0373	0.0423	0.0359	0.0292	0.0256	0.035	0.0312	0.0235		0.0204	0.0208	0.0235	0.0178	0.0153	0.0232	0.02	0.0192			0.0402	0.0448
48.8	0.0429629	0.0541257	0.0278714	0.0308271	0.0319514	0.0400514	0.02779	0.0251729		48.8	0.0412	0.046	0.0336	0.0308	0.0282	0.0362	0.0342	0.0215		0.0395	0.0442	0.0346	0.03	0.0275	0.0353	0.0327	0.0219		0.037	0.0417	0.0356	0.029	0.0255	0.0349	0.0312	0.0235		0.0203	0.0206	0.0234	0.0177	0.0152	0.0231	0.02	0.0191			0.0399	0.0444
49	0.0435129	0.0559257	0.0264714	0.0273771	0.0325514	0.0473514	0.03049	0.0233229		49	0.0408	0.0455	0.0333	0.0309	0.0282	0.0361	0.0343	0.0228		0.0392	0.0437	0.0343	0.0299	0.0273	0.0352	0.0326	0.0219		0.0366	0.0411	0.0353	0.0288	0.0253	0.0347	0.0311	0.0235		0.0202	0.0205	0.0233	0.0176	0.0151	0.023	0.0199	0.019			0.0396	0.0439
49.2	0.0438129	0.0541257	0.0278714	0.0263271	0.0308514	0.0433514	0.02884	0.0237229		49.2	0.0405	0.0449	0.0332	0.0309	0.0281	0.0359	0.0343	0.0205		0.0389	0.0431	0.0341	0.0298	0.0272	0.035	0.0325	0.0218		0.0362	0.0405	0.035	0.0286	0.0252	0.0346	0.031	0.0234		0.02	0.0203	0.0232	0.0175	0.015	0.0229	0.0198	0.019			0.0392	0.0433
49.4	0.0420129	0.0520257	0.0283214	0.0362771	0.0302014	0.0446514	0.02749	0.0240229		49.4	0.0402	0.0443	0.033	0.0307	0.0279	0.0358	0.0341	0.0193		0.0384	0.0424	0.0339	0.0296	0.0271	0.0349	0.0324	0.0215		0.0358	0.0399	0.0347	0.0284	0.025	0.0344	0.0308	0.0233		0.0199	0.0202	0.023	0.0174	0.0149	0.0228	0.0197	0.0189			0.0389	0.0427
49.6	0.0411629	0.0527757	0.0296214	0.0219271	0.0287014	0.0462514	0.02784	0.0240229		49.6	0.0398	0.0437	0.0329	0.0303	0.0277	0.0356	0.0337	0.0209		0.0379	0.0418	0.0337	0.0295	0.027	0.0348	0.0323	0.0216		0.0352	0.0393	0.0344	0.0282	0.0249	0.0342	0.0306	0.0232		0.0197	0.02	0.0229	0.0173	0.0148	0.0227	0.0196	0.0188			0.0384	0.0421
49.8	0.0426129	0.0542257	0.0289214	0.0302771	0.0289514	0.0405014	0.02529	0.0249729		49.8	0.0393	0.0433	0.0326	0.03	0.0275	0.0354	0.0334	0.0224		0.0374	0.0413	0.0335	0.0292	0.0269	0.0346	0.0321	0.0223		0.0347	0.039	0.0341	0.0279	0.0246	0.034	0.0304	0.0231		0.0196	0.0199	0.0228	0.0172	0.0147	0.0226	0.0195	0.0187			0.0378	0.0416
50	0.0432129	0.0514757	0.0273214	0.0216271	0.0314514	0.0424514	0.03074	0.0259229		50	0.0389	0.0429	0.0324	0.0298	0.0274	0.0351	0.0332	0.0219		0.0369	0.041	0.0332	0.029	0.0267	0.0343	0.0318	0.0223		0.0343	0.0387	0.0338	0.0276	0.0243	0.0337	0.0301	0.0229		0.0194	0.0197	0.0226	0.0171	0.0146	0.0225	0.0194	0.0186			0.0374	0.0413
50.2	0.0407129	0.0523257	0.0259714	0.0291771	0.0279014	0.0404014	0.02699	0.0243729		50.2	0.0386	0.0427	0.0323	0.0298	0.0273	0.0349	0.0332	0.0195		0.0366	0.0408	0.033	0.0287	0.0264	0.0341	0.0316	0.0219		0.034	0.0385	0.0336	0.0273	0.024	0.0334	0.0299	0.0228		0.0193	0.0196	0.0225	0.0169	0.0145	0.0223	0.0192	0.0185			0.0371	0.0411
50.4	0.0412129	0.0521757	0.0269714	0.0292771	0.0276514	0.0399514	0.02479	0.0245229		50.4	0.0383	0.0426	0.0321	0.0296	0.0271	0.0346	0.0332	0.0212		0.0363	0.0407	0.0328	0.0284	0.0261	0.0337	0.0314	0.0215		0.0338	0.0384	0.0334	0.027	0.0237	0.0331	0.0296	0.0225		0.0191	0.0194	0.0223	0.0168	0.0144	0.0222	0.0191	0.0184			0.0368	0.0409
50.6	0.0414129	0.0526757	0.0270714	0.0244271	0.0319514	0.0432014	0.02874	0.0213229		50.6	0.0381	0.0424	0.032	0.0294	0.0267	0.0344	0.0331	0.0221		0.0362	0.0406	0.0326	0.0282	0.0258	0.0334	0.0312	0.0211		0.0336	0.0382	0.0332	0.0267	0.0234	0.0328	0.0294	0.0223		0.019	0.0192	0.0222	0.0167	0.0142	0.0221	0.019	0.0183			0.0366	0.0408
50.8	0.0404629	0.0511757	0.0264214	0.0243271	0.0293514	0.0428014	0.02599	0.0237729		50.8	0.0379	0.0422	0.0319	0.0291	0.0264	0.0343	0.0327	0.0219		0.036	0.0404	0.0325	0.028	0.0255	0.0332	0.0309	0.0198		0.0335	0.0378	0.033	0.0265	0.0232	0.0326	0.0291	0.0221		0.0188	0.0191	0.022	0.0165	0.0141	0.0219	0.0189	0.0182			0.0365	0.0406
51	0.0412629	0.0508257	0.0274714	0.0286771	0.0325514	0.0441514	0.02674	0.0233729		51	0.0378	0.0418	0.0318	0.0288	0.0262	0.0343	0.0324	0.0182		0.0359	0.0401	0.0324	0.0278	0.0253	0.033	0.0306	0.0197		0.0332	0.0374	0.0328	0.0264	0.023	0.0324	0.0288	0.022		0.0187	0.0189	0.0219	0.0164	0.014	0.0218	0.0187	0.0181			0.0363	0.0402
51.2	0.0428629	0.0508757	0.0266714	0.0228771	0.0287514	0.0445014	0.02914	0.0214729		51.2	0.0376	0.0415	0.0317	0.0287	0.0261	0.0342	0.0321	0.0191		0.0356	0.0396	0.0323	0.0277	0.0251	0.0329	0.0304	0.02		0.0329	0.037	0.0326	0.0263	0.0228	0.0323	0.0286	0.0218		0.0185	0.0188	0.0218	0.0163	0.0138	0.0217	0.0186	0.0179			0.0361	0.0398
51.4	0.0401129	0.0510257	0.0277214	0.0283271	0.0294014	0.0415014	0.02324	0.0252729		51.4	0.0374	0.0411	0.0316	0.0287	0.026	0.034	0.032	0.0209		0.0353	0.0391	0.0321	0.0276	0.025	0.0329	0.0303	0.02		0.0324	0.0365	0.0324	0.0262	0.0227	0.0321	0.0285	0.0217		0.0184	0.0187	0.0216	0.0161	0.0137	0.0215	0.0185	0.0178			0.0357	0.0393
51.6	0.0375129	0.0506757	0.0272214	0.0268271	0.0279514	0.0444514	0.02854	0.0235229		51.6	0.0371	0.0406	0.0316	0.0287	0.026	0.0338	0.0319	0.0219		0.0349	0.0386	0.0319	0.0275	0.0248	0.0328	0.0301	0.02		0.032	0.036	0.0321	0.026	0.0225	0.0319	0.0283	0.0217		0.0183	0.0186	0.0215	0.016	0.0136	0.0214	0.0184	0.0177			0.0354	0.0388
51.8	0.0387629	0.0517757	0.0282214	0.0222771	0.0284514	0.0430514	0.02829	0.0241229		51.8	0.0367	0.0403	0.0314	0.0285	0.0258	0.0335	0.0319	0.0194		0.0345	0.0382	0.0317	0.0273	0.0247	0.0325	0.0301	0.02		0.0315	0.0356	0.0317	0.0257	0.0223	0.0317	0.0282	0.0216		0.0182	0.0185	0.0214	0.0159	0.0135	0.0213	0.0183	0.0176			0.035	0.0385
52	0.0388129	0.0512757	0.0277714	0.0311771	0.0260014	0.0385514	0.02509	0.0223229		52	0.0362	0.0402	0.0311	0.0282	0.0256	0.0333	0.0317	0.0171		0.0341	0.038	0.0314	0.0271	0.0245	0.0323	0.0299	0.0203		0.0311	0.0354	0.0314	0.0254	0.0221	0.0314	0.0281	0.0216		0.0181	0.0184	0.0213	0.0158	0.0134	0.0212	0.0181	0.0175			0.0345	0.0383
52.2	0.0393129	0.0521257	0.0264214	0.0214771	0.0299514	0.0438514	0.02599	0.0198729		52.2	0.0359	0.0401	0.0309	0.028	0.0254	0.0331	0.0315	0.0185		0.0338	0.038	0.0312	0.0268	0.0243	0.032	0.0298	0.0209		0.0309	0.0354	0.0312	0.0251	0.0219	0.0311	0.0279	0.0216		0.018	0.0183	0.0212	0.0157	0.0133	0.0211	0.018	0.0174			0.0343	0.0382
52.4	0.0414129	0.0513757	0.0275214	0.0264271	0.0319514	0.0433014	0.02529	0.0242229		52.4	0.0357	0.04	0.0307	0.0277	0.0253	0.0329	0.0313	0.0203		0.0337	0.0379	0.0311	0.0266	0.0242	0.0317	0.0296	0.0213		0.0308	0.0353	0.031	0.0248	0.0217	0.0308	0.0277	0.0216		0.0179	0.0183	0.0211	0.0156	0.0132	0.021	0.0179	0.0173			0.0341	0.0382
52.6	0.0398629	0.0520257	0.0267214	0.0230271	0.0340014	0.0451514	0.02694	0.0245229		52.6	0.0355	0.0399	0.0306	0.0277	0.0251	0.0326	0.0313	0.0211		0.0336	0.0379	0.0309	0.0264	0.0241	0.0314	0.0295	0.0214		0.0308	0.0354	0.0309	0.0245	0.0215	0.0305	0.0275	0.0216		0.0179	0.0182	0.0211	0.0155	0.0131	0.0209	0.0178	0.0171			0.034	0.0381
52.8	0.0373129	0.0504757	0.0260714	0.0252771	0.0270514	0.0391514	0.02729	0.0240729		52.8	0.0355	0.0399	0.0305	0.0277	0.025	0.0324	0.0313	0.0195		0.0335	0.038	0.0308	0.0263	0.0239	0.0313	0.0294	0.0213		0.0309	0.0355	0.0308	0.0244	0.0213	0.0304	0.0273	0.0214		0.0178	0.0182	0.021	0.0154	0.013	0.0208	0.0177	0.017			0.034	0.0382
53	0.0372629	0.0514757	0.0258214	0.0255271	0.0269014	0.0402514	0.02404	0.0243729		53	0.0354	0.04	0.0305	0.0277	0.0249	0.0323	0.0312	0.0188		0.0335	0.0381	0.0307	0.0262	0.0238	0.0313	0.0293	0.021		0.0309	0.0356	0.0308	0.0244	0.0211	0.0304	0.0271	0.0213		0.0178	0.0181	0.0209	0.0153	0.0129	0.0207	0.0177	0.017			0.034	0.0383
53.2	0.0370129	0.0518257	0.0267714	0.0249271	0.0259514	0.0461014	0.02629	0.0240729		53.2	0.0354	0.0401	0.0304	0.0274	0.0248	0.0323	0.0309	0.0199		0.0335	0.0383	0.0307	0.0262	0.0236	0.0313	0.0291	0.0207		0.0309	0.0358	0.0308	0.0244	0.021	0.0304	0.027	0.0211		0.0177	0.0181	0.0209	0.0152	0.0128	0.0207	0.0176	0.0169			0.034	0.0384
53.4	0.0396629	0.0519257	0.0268714	0.0241271	0.0251014	0.0446014	0.02569	0.0235729		53.4	0.0355	0.0403	0.0304	0.0272	0.0247	0.0324	0.0307	0.0209		0.0336	0.0384	0.0307	0.0261	0.0235	0.0314	0.0289	0.0206		0.031	0.0359	0.0308	0.0244	0.0209	0.0304	0.0268	0.021		0.0177	0.018	0.0208	0.0152	0.0127	0.0206	0.0175	0.0168			0.034	0.0386
53.6	0.0362629	0.0504257	0.0267214	0.0282771	0.0300514	0.0425014	0.02529	0.0258229		53.6	0.0356	0.0404	0.0303	0.027	0.0246	0.0325	0.0304	0.02		0.0336	0.0386	0.0307	0.026	0.0234	0.0313	0.0288	0.0213		0.031	0.0361	0.0309	0.0243	0.0208	0.0304	0.0268	0.0208		0.0176	0.018	0.0208	0.0151	0.0127	0.0205	0.0174	0.0167			0.034	0.0388
53.8	0.0364629	0.0514257	0.0275214	0.0193771	0.0293514	0.0409514	0.02979	0.0230729		53.8	0.0357	0.0403	0.0302	0.0269	0.0245	0.0324	0.0303	0.0185		0.0337	0.0386	0.0306	0.0259	0.0234	0.0312	0.0288	0.0213		0.0311	0.0361	0.0309	0.0243	0.0208	0.0303	0.0268	0.0207		0.0176	0.0179	0.0207	0.015	0.0126	0.0205	0.0174	0.0166			0.0341	0.0388
54	0.0383629	0.0479757	0.0283714	0.0280771	0.0269014	0.0391514	0.02549	0.0218229		54	0.0357	0.0402	0.0302	0.0271	0.0245	0.0323	0.0302	0.0195		0.0337	0.0385	0.0305	0.0258	0.0234	0.0311	0.0287	0.0212		0.0311	0.0361	0.0308	0.0242	0.0208	0.0303	0.0268	0.0206		0.0175	0.0179	0.0207	0.015	0.0125	0.0204	0.0173	0.0165			0.0341	0.0387
54.2	0.0360129	0.0511257	0.0271714	0.0258271	0.0247514	0.0371014	0.02589	0.0229729		54.2	0.0357	0.0401	0.0301	0.0272	0.0246	0.0321	0.0304	0.0206		0.0337	0.0383	0.0304	0.0258	0.0233	0.0311	0.0287	0.0214		0.0311	0.0359	0.0308	0.0242	0.0207	0.0302	0.0267	0.0205		0.0175	0.0178	0.0206	0.0149	0.0125	0.0204	0.0172	0.0165			0.0341	0.0385
54.4	0.0363629	0.0513757	0.0274214	0.0217771	0.0234014	0.0424514	0.02639	0.0221729		54.4	0.0356	0.0399	0.0301	0.0272	0.0245	0.0321	0.0306	0.0214		0.0337	0.0382	0.0303	0.0258	0.0233	0.031	0.0287	0.0192		0.031	0.0358	0.0307	0.0241	0.0207	0.0301	0.0266	0.0203		0.0174	0.0178	0.0206	0.0149	0.0124	0.0203	0.0172	0.0164			0.034	0.0383
54.6	0.0353129	0.0501757	0.0261214	0.0253771	0.0234514	0.0426514	0.02419	0.0242729		54.6	0.0355	0.0396	0.0301	0.0271	0.0244	0.0321	0.0308	0.0198		0.0335	0.038	0.0302	0.0258	0.0232	0.0311	0.0287	0.0197		0.0308	0.0356	0.0306	0.0241	0.0207	0.0301	0.0266	0.0202		0.0174	0.0177	0.0205	0.0148	0.0124	0.0203	0.0171	0.0163			0.0339	0.0381
54.8	0.0348129	0.0478757	0.0260214	0.0244271	0.0280514	0.0461014	0.02404	0.0232229		54.8	0.0354	0.0394	0.03	0.0269	0.0243	0.0321	0.0307	0.0185		0.0334	0.0378	0.0301	0.0258	0.0232	0.031	0.0286	0.0202		0.0307	0.0354	0.0305	0.024	0.0206	0.0301	0.0265	0.0201		0.0174	0.0177	0.0205	0.0148	0.0123	0.0202	0.0171	0.0163			0.0337	0.038
55	0.0351629	0.0493757	0.0273714	0.0233771	0.0260514	0.0420514	0.02609	0.0237229		55	0.0352	0.0392	0.0298	0.0267	0.0242	0.0321	0.0304	0.0183		0.0332	0.0376	0.0301	0.0256	0.0231	0.031	0.0285	0.0204		0.0306	0.0352	0.0303	0.0239	0.0205	0.03	0.0265	0.02		0.0173	0.0177	0.0204	0.0147	0.0123	0.0202	0.017	0.0162			0.0336	0.0378
55.2	0.0345629	0.0498757	0.0247714	0.0248771	0.0241014	0.0391014	0.02459	0.0232729		55.2	0.0351	0.039	0.0296	0.0266	0.0241	0.0319	0.0301	0.0198		0.0331	0.0375	0.03	0.0255	0.0229	0.0309	0.0284	0.0204		0.0304	0.0351	0.0302	0.0237	0.0204	0.0299	0.0264	0.02		0.0173	0.0176	0.0204	0.0147	0.0122	0.0201	0.017	0.0161			0.0335	0.0377
55.4	0.0381129	0.0502757	0.0263214	0.0214771	0.0277014	0.0419014	0.02444	0.0215729		55.4	0.0349	0.0389	0.0295	0.0266	0.0241	0.0317	0.0298	0.021		0.033	0.0374	0.0298	0.0253	0.0228	0.0307	0.0283	0.0203		0.0303	0.035	0.0301	0.0236	0.0202	0.0298	0.0263	0.0199		0.0173	0.0176	0.0204	0.0146	0.0122	0.0201	0.0169	0.0161			0.0334	0.0376
55.6	0.0345129	0.0487757	0.0258714	0.0209771	0.0238514	0.0382014	0.02379	0.0213229		55.6	0.0348	0.0388	0.0294	0.0265	0.024	0.0315	0.0297	0.0207		0.0328	0.0373	0.0297	0.0252	0.0228	0.0306	0.0282	0.0201		0.0302	0.0349	0.03	0.0234	0.0201	0.0297	0.0261	0.0198		0.0172	0.0176	0.0203	0.0146	0.0121	0.02	0.0169	0.016			0.0332	0.0375
55.8	0.0346129	0.0488257	0.0264714	0.0274271	0.0247014	0.0377014	0.02479	0.0238729		55.8	0.0346	0.0387	0.0294	0.0264	0.0239	0.0314	0.0298	0.0197		0.0327	0.0372	0.0296	0.0251	0.0227	0.0304	0.028	0.0199		0.0301	0.0348	0.0299	0.0233	0.02	0.0296	0.026	0.0197		0.0172	0.0176	0.0203	0.0146	0.0121	0.02	0.0168	0.016			0.0331	0.0374
56	0.0361629	0.0499257	0.0250714	0.0224771	0.0255014	0.0376014	0.02509	0.0222729		56	0.0345	0.0386	0.0294	0.0263	0.0238	0.0314	0.0299	0.0187		0.0326	0.0371	0.0296	0.025	0.0226	0.0303	0.0279	0.0196		0.03	0.0347	0.0298	0.0232	0.0199	0.0295	0.0259	0.0196		0.0172	0.0175	0.0203	0.0145	0.0121	0.02	0.0168	0.0159			0.033	0.0373
56.2	0.0347129	0.0469257	0.0248714	0.0220271	0.0233514	0.0440014	0.02489	0.0229229		56.2	0.0344	0.0385	0.0293	0.0261	0.0236	0.0313	0.0299	0.0186		0.0325	0.037	0.0295	0.0249	0.0225	0.0302	0.0278	0.0192		0.0299	0.0347	0.0298	0.0231	0.0198	0.0294	0.0258	0.0194		0.0172	0.0175	0.0203	0.0145	0.012	0.0199	0.0168	0.0159			0.0329	0.0372
56.4	0.0352629	0.0482757	0.0253714	0.0270771	0.0254014	0.0461014	0.02589	0.0243729		56.4	0.0344	0.0385	0.0292	0.026	0.0234	0.0312	0.0297	0.0197		0.0324	0.0369	0.0294	0.0249	0.0224	0.0302	0.0277	0.0189		0.0298	0.0346	0.0297	0.0231	0.0197	0.0293	0.0257	0.0193		0.0171	0.0175	0.0202	0.0145	0.012	0.0199	0.0167	0.0158			0.0328	0.0371
56.6	0.0352629	0.0475257	0.0258714	0.0223771	0.0262014	0.0339014	0.02584	0.0227729		56.6	0.0343	0.0384	0.0291	0.026	0.0233	0.0311	0.0294	0.0197		0.0324	0.0368	0.0294	0.0248	0.0223	0.0301	0.0277	0.0188		0.0297	0.0345	0.0296	0.023	0.0196	0.0292	0.0256	0.0192		0.0171	0.0175	0.0202	0.0145	0.012	0.0199	0.0167	0.0158			0.0327	0.037
56.8	0.0365629	0.0493257	0.0264714	0.0227271	0.0222014	0.0339014	0.02554	0.0238729		56.8	0.0342	0.0383	0.029	0.0259	0.0233	0.031	0.0291	0.0203		0.0323	0.0367	0.0293	0.0247	0.0221	0.03	0.0276	0.0188		0.0297	0.0345	0.0296	0.023	0.0195	0.0292	0.0255	0.0191		0.0171	0.0175	0.0202	0.0144	0.012	0.0199	0.0167	0.0158			0.0327	0.0369
57	0.0361129	0.0466757	0.0265214	0.0216271	0.0271014	0.0390014	0.02414	0.0217229		57	0.0342	0.0382	0.0291	0.0259	0.0232	0.031	0.029	0.0193		0.0323	0.0367	0.0293	0.0246	0.022	0.03	0.0274	0.0187		0.0296	0.0344	0.0295	0.0229	0.0195	0.0291	0.0254	0.019		0.0171	0.0175	0.0202	0.0144	0.0119	0.0198	0.0166	0.0157			0.0326	0.0368
57.2	0.0354629	0.0491757	0.0269214	0.0240271	0.0264514	0.0414014	0.02394	0.0214229		57.2	0.0341	0.0382	0.0291	0.0258	0.0232	0.031	0.029	0.0177		0.0322	0.0366	0.0292	0.0245	0.0219	0.0298	0.0273	0.0187		0.0295	0.0343	0.0295	0.0228	0.0194	0.029	0.0253	0.0189		0.0171	0.0175	0.0202	0.0144	0.0119	0.0198	0.0166	0.0157			0.0326	0.0368
57.4	0.0354129	0.0490257	0.0277214	0.0221271	0.0235014	0.0403014	0.02399	0.0189729		57.4	0.0341	0.0381	0.0291	0.0256	0.023	0.0309	0.029	0.0177		0.0322	0.0366	0.0291	0.0244	0.0218	0.0297	0.0272	0.0188		0.0295	0.0343	0.0294	0.0227	0.0193	0.0289	0.0252	0.0188		0.0171	0.0175	0.0202	0.0144	0.0119	0.0198	0.0166	0.0157			0.0325	0.0367
57.6	0.0355629	0.0503257	0.0275714	0.0240271	0.0252514	0.0378014	0.02429	0.0231729		57.6	0.034	0.038	0.029	0.0255	0.0229	0.0308	0.0289	0.0181		0.0321	0.0365	0.0291	0.0243	0.0218	0.0296	0.027	0.0188		0.0294	0.0342	0.0293	0.0226	0.0192	0.0289	0.0251	0.0187		0.0172	0.0176	0.0202	0.0144	0.0119	0.0198	0.0166	0.0156			0.0325	0.0367
57.8	0.0341629	0.0471757	0.0265714	0.0204771	0.0244014	0.0367514	0.02434	0.0243229		57.8	0.034	0.038	0.0288	0.0254	0.0228	0.0306	0.0289	0.0192		0.0321	0.0365	0.029	0.0242	0.0217	0.0295	0.027	0.0188		0.0294	0.0342	0.0293	0.0225	0.0191	0.0288	0.025	0.0186		0.0172	0.0176	0.0202	0.0144	0.0119	0.0198	0.0166	0.0156			0.0324	0.0366
58	0.0364129	0.0491257	0.0268714	0.0256771	0.0235014	0.0365014	0.02129	0.0231729		58	0.0339	0.038	0.0287	0.0254	0.0228	0.0304	0.0287	0.0187		0.032	0.0365	0.0289	0.0242	0.0217	0.0295	0.0269	0.0187		0.0293	0.0342	0.0292	0.0224	0.019	0.0287	0.0249	0.0185		0.0172	0.0176	0.0203	0.0144	0.0119	0.0198	0.0166	0.0156			0.0324	0.0366
58.2	0.0359129	0.0501757	0.0256714	0.0204271	0.0249514	0.0351514	0.02509	0.0235729		58.2	0.0339	0.0381	0.0287	0.0254	0.0228	0.0304	0.0286	0.0182		0.032	0.0366	0.0289	0.0241	0.0216	0.0294	0.0269	0.0186		0.0293	0.0343	0.0292	0.0224	0.0189	0.0286	0.0249	0.0185		0.0172	0.0177	0.0203	0.0144	0.0119	0.0198	0.0166	0.0156			0.0324	0.0367
58.4	0.0375629	0.0484257	0.0267214	0.0239271	0.0285014	0.0382014	0.02439	0.0197229		58.4	0.034	0.0382	0.0287	0.0254	0.0228	0.0304	0.0286	0.0181		0.0321	0.0367	0.0289	0.0241	0.0216	0.0294	0.0268	0.0186		0.0294	0.0345	0.0292	0.0223	0.0189	0.0286	0.0248	0.0185		0.0173	0.0177	0.0203	0.0144	0.0119	0.0198	0.0166	0.0156			0.0324	0.0368
58.6	0.0356629	0.0499757	0.0280714	0.0197771	0.0264514	0.0393514	0.02254	0.0224729		58.6	0.034	0.0384	0.0288	0.0254	0.0227	0.0304	0.0286	0.0189		0.0321	0.0368	0.0289	0.0241	0.0215	0.0293	0.0268	0.0186		0.0295	0.0346	0.0292	0.0223	0.0188	0.0285	0.0248	0.0185		0.0173	0.0177	0.0203	0.0144	0.0119	0.0199	0.0166	0.0156			0.0324	0.037
58.8	0.0368129	0.0533757	0.0255214	0.0253271	0.0241514	0.0389514	0.02669	0.0212229		58.8	0.0341	0.0385	0.0288	0.0253	0.0226	0.0304	0.0286	0.0194		0.0322	0.037	0.0289	0.024	0.0215	0.0293	0.0268	0.0186		0.0296	0.0347	0.0292	0.0223	0.0188	0.0285	0.0247	0.0185		0.0173	0.0178	0.0204	0.0144	0.0119	0.0199	0.0166	0.0156			0.0325	0.0371
59	0.0350629	0.0514257	0.0269214	0.0189271	0.0252014	0.0330014	0.02174	0.0223729		59	0.0342	0.0386	0.0287	0.0252	0.0225	0.0304	0.0285	0.0199		0.0323	0.0372	0.0289	0.024	0.0214	0.0294	0.0267	0.0185		0.0297	0.0349	0.0293	0.0223	0.0188	0.0285	0.0247	0.0184		0.0174	0.0178	0.0204	0.0145	0.0119	0.0199	0.0166	0.0156			0.0326	0.0373
59.2	0.0349629	0.0495757	0.0261714	0.0252771	0.0225014	0.0327014	0.02384	0.0219229		59.2	0.0342	0.0388	0.0287	0.0252	0.0225	0.0303	0.0285	0.0196		0.0324	0.0374	0.0289	0.024	0.0214	0.0294	0.0267	0.0185		0.0298	0.0351	0.0293	0.0223	0.0188	0.0286	0.0247	0.0184		0.0174	0.0178	0.0204	0.0145	0.0119	0.0199	0.0166	0.0156			0.0327	0.0374
59.4	0.0349129	0.0495257	0.0269714	0.0191771	0.0242514	0.0339514	0.02134	0.0233729		59.4	0.0344	0.039	0.0287	0.0252	0.0226	0.0303	0.0284	0.0189		0.0325	0.0375	0.029	0.024	0.0215	0.0294	0.0267	0.0184		0.03	0.0352	0.0294	0.0224	0.0188	0.0286	0.0247	0.0184		0.0174	0.0178	0.0204	0.0145	0.012	0.0199	0.0166	0.0156			0.0328	0.0376
59.6	0.0364129	0.0485757	0.0267714	0.0234271	0.0269514	0.0348514	0.02244	0.0230229		59.6	0.0345	0.0391	0.0288	0.0253	0.0227	0.0304	0.0285	0.0185		0.0326	0.0377	0.0291	0.0241	0.0215	0.0294	0.0267	0.0189		0.0301	0.0353	0.0295	0.0224	0.0188	0.0287	0.0247	0.0183		0.0174	0.0178	0.0204	0.0145	0.012	0.0199	0.0167	0.0156			0.0329	0.0378
59.8	0.0360629	0.0492757	0.0264214	0.0221771	0.0282014	0.0353014	0.02169	0.0205229		59.8	0.0346	0.0391	0.0289	0.0253	0.0227	0.0305	0.0285	0.0182		0.0328	0.0376	0.0291	0.0241	0.0215	0.0295	0.0267	0.0188		0.0302	0.0353	0.0296	0.0225	0.0189	0.0287	0.0247	0.0183		0.0174	0.0178	0.0204	0.0145	0.012	0.02	0.0167	0.0156			0.033	0.0378
60	0.0375129	0.0492257	0.0269214	0.0230771	0.0260514	0.0408014	0.02539	0.0218729		60	0.0347	0.039	0.0289	0.0254	0.0227	0.0306	0.0286	0.0177		0.0328	0.0375	0.0291	0.0241	0.0215	0.0295	0.0268	0.0187		0.0302	0.0351	0.0296	0.0225	0.0189	0.0288	0.0248	0.0182		0.0174	0.0178	0.0204	0.0145	0.012	0.02	0.0167	0.0156			0.0331	0.0377
[truncated: 22 more columns]

## Sheet: 2A_Aligned_RMSE(BB_0.1)_PPMCC
t	S3	S4	S5	S6	S7	S8	S9	S10		time	HEC_P3	HEC_P4	HEC_P5	HEC_P6	HEC_P7	HEC_P8	HEC_P9	HEC_P10		HEC_BR_10_P3	HEC_BR_10_P4	HEC_BR_10_P5	HEC_BR_10_P6	HEC_BR_10_P7	HEC_BR_10_P8	HEC_BR_10_P9	HEC_BR_10_P10		Error_3	Error_4	Error_5	Error_6	Error_7	Error_8	Error_9	Error_10		Error^2_3	Error^2_4	Error^2_5	Error^2_6	Error^2_7	Error^2_8	Error^2_9	Error^2_10		RMSE_3	RMSE_4	RMSE_5
0	-3.71429e-05	-7.42857e-05	-0.000128571	7.71429e-05	1.42857e-06	5.14286e-05	-0.00011	2.28571e-05		0	0	0	0	0	0	0	0	0		0	0	0	0	0	0	0	0		-3.71429e-05	-7.42857e-05	-0.000128571	7.71429e-05	1.42857e-06	5.14286e-05	-0.00011	2.28571e-05		1.37959e-09	5.51837e-09	1.65306e-08	5.95102e-09	2.04082e-12	2.6449e-09	1.21e-08	5.22449e-10		0.815606	1.15331	1.01693
0.2	-8.71429e-05	-2.42857e-05	-7.85714e-05	-0.000122857	0.000301429	1.42857e-06	-0.00021	7.28571e-05		0.2	0	0	0	0	0	0	0	0		0	0	0	0	0	0	0	0		-8.71429e-05	-2.42857e-05	-7.85714e-05	-0.000122857	0.000301429	1.42857e-06	-0.00021	7.28571e-05		7.59388e-09	5.89796e-10	6.17347e-09	1.50939e-08	9.08592e-08	2.04082e-12	4.41e-08	5.30816e-09
0.4	6.28571e-05	-2.42857e-05	7.14286e-05	2.71429e-05	-0.000148571	1.42857e-06	0.00019	-7.71429e-05		0.4	0	0	0	0	0	0	0	0		0	0	0	0	0	0	0	0		6.28571e-05	-2.42857e-05	7.14286e-05	2.71429e-05	-0.000148571	1.42857e-06	0.00019	-7.71429e-05		3.95102e-09	5.89796e-10	5.10204e-09	7.36735e-10	2.20735e-08	2.04082e-12	3.61e-08	5.95102e-09
0.6	-3.71429e-05	0.000275714	2.14286e-05	-2.28571e-05	0.000101429	-4.85714e-05	9e-05	0.000122857		0.6	0	0	0	0	0	0	0	0		0	0	0	0	0	0	0	0		-3.71429e-05	0.000275714	2.14286e-05	-2.28571e-05	0.000101429	-4.85714e-05	9e-05	0.000122857		1.37959e-09	7.60184e-08	4.59184e-10	5.22449e-10	1.02878e-08	2.35918e-09	8.1e-09	1.50939e-08
0.8	6.28571e-05	7.57143e-05	-7.85714e-05	-7.28571e-05	1.42857e-06	-0.000148571	-1e-05	2.28571e-05		0.8	0	0	0	0	0	0	0	0		0	0	0	0	0	0	0	0		6.28571e-05	7.57143e-05	-7.85714e-05	-7.28571e-05	1.42857e-06	-0.000148571	-1e-05	2.28571e-05		3.95102e-09	5.73265e-09	6.17347e-09	5.30816e-09	2.04082e-12	2.20735e-08	1e-10	5.22449e-10
1	-3.71429e-05	-0.000124286	-0.000178571	-2.28571e-05	1.42857e-06	-9.85714e-05	-1e-05	2.28571e-05		1	0	0	0	0	0	0	0	0		0	0	0	0	0	0	0	0		-3.71429e-05	-0.000124286	-0.000178571	-2.28571e-05	1.42857e-06	-9.85714e-05	-1e-05	2.28571e-05		1.37959e-09	1.54469e-08	3.18878e-08	5.22449e-10	2.04082e-12	9.71633e-09	1e-10	5.22449e-10
1.2	-3.71429e-05	0.000125714	7.14286e-05	-7.28571e-05	1.42857e-06	1.42857e-06	-6e-05	-2.71429e-05		1.2	0	0	0	0	0	0	0	0		0	0	0	0	0	0	0	0		-3.71429e-05	0.000125714	7.14286e-05	-7.28571e-05	1.42857e-06	1.42857e-06	-6e-05	-2.71429e-05		1.37959e-09	1.58041e-08	5.10204e-09	5.30816e-09	2.04082e-12	2.04082e-12	3.6e-09	7.36735e-10
1.4	6.28571e-05	2.57143e-05	0.000121429	2.71429e-05	5.14286e-05	0.000251429	-0.00026	0.000222857		1.4	0	0	0	0	0	0	0	0		0	0	0	0	0	0	0	0		6.28571e-05	2.57143e-05	0.000121429	2.71429e-05	5.14286e-05	0.000251429	-0.00026	0.000222857		3.95102e-09	6.61224e-10	1.47449e-08	7.36735e-10	2.6449e-09	6.32163e-08	6.76e-08	4.96653e-08
1.6	-3.71429e-05	7.57143e-05	-7.85714e-05	2.71429e-05	5.14286e-05	-0.000148571	0.00024	-7.71429e-05		1.6	0	0	0	0	0	0	0	0		0	0	0	0	0	0	0	0		-3.71429e-05	7.57143e-05	-7.85714e-05	2.71429e-05	5.14286e-05	-0.000148571	0.00024	-7.71429e-05		1.37959e-09	5.73265e-09	6.17347e-09	7.36735e-10	2.6449e-09	2.20735e-08	5.76e-08	5.95102e-09
1.8	1.28571e-05	2.57143e-05	-2.85714e-05	2.71429e-05	-0.000248571	1.42857e-06	4e-05	-7.71429e-05		1.8	0	0	0	0	0	0	0	0		0	0	0	0	0	0	0	0		1.28571e-05	2.57143e-05	-2.85714e-05	2.71429e-05	-0.000248571	1.42857e-06	4e-05	-7.71429e-05		1.65306e-10	6.61224e-10	8.16327e-10	7.36735e-10	6.17878e-08	2.04082e-12	1.6e-09	5.95102e-09
2	6.28571e-05	2.57143e-05	-7.85714e-05	0.000327143	1.42857e-06	0.000151429	-0.00016	-0.000127143		2	0	0	0	0	0	0	0	0		0	0	0	0	0	0	0	0		6.28571e-05	2.57143e-05	-7.85714e-05	0.000327143	1.42857e-06	0.000151429	-0.00016	-0.000127143		3.95102e-09	6.61224e-10	6.17347e-09	1.07022e-07	2.04082e-12	2.29306e-08	2.56e-08	1.61653e-08
2.2	-8.71429e-05	-0.000124286	2.14286e-05	2.71429e-05	5.14286e-05	-0.000248571	-0.00011	0.000172857		2.2	0	0	0	0	0	0	0	0		0	0	0	0	0	0	0	0		-8.71429e-05	-0.000124286	2.14286e-05	2.71429e-05	5.14286e-05	-0.000248571	-0.00011	0.000172857		7.59388e-09	1.54469e-08	4.59184e-10	7.36735e-10	2.6449e-09	6.17878e-08	1.21e-08	2.98796e-08
2.4	1.28571e-05	-2.42857e-05	0.000121429	-2.28571e-05	0.000201429	0.000251429	-0.00011	-7.71429e-05		2.4	0	0	0	0	0	0	0	0		0	0	0	0	0	0	0	0		1.28571e-05	-2.42857e-05	0.000121429	-2.28571e-05	0.000201429	0.000251429	-0.00011	-7.71429e-05		1.65306e-10	5.89796e-10	1.47449e-08	5.22449e-10	4.05735e-08	6.32163e-08	1.21e-08	5.95102e-09
2.6	1.28571e-05	7.57143e-05	-2.85714e-05	0.000327143	-0.000148571	0.000201429	-0.00021	-7.71429e-05		2.6	0	0	0	0	0	0	0	0		0	0	0	0	0	0	0	0		1.28571e-05	7.57143e-05	-2.85714e-05	0.000327143	-0.000148571	0.000201429	-0.00021	-7.71429e-05		1.65306e-10	5.73265e-09	8.16327e-10	1.07022e-07	2.20735e-08	4.05735e-08	4.41e-08	5.95102e-09
2.8	6.28571e-05	7.57143e-05	2.14286e-05	-7.28571e-05	-0.000148571	-0.000148571	0.00019	-2.71429e-05		2.8	0	0	0	0	0	0	0	0		0	0	0	0	0	0	0	0		6.28571e-05	7.57143e-05	2.14286e-05	-7.28571e-05	-0.000148571	-0.000148571	0.00019	-2.71429e-05		3.95102e-09	5.73265e-09	4.59184e-10	5.30816e-09	2.20735e-08	2.20735e-08	3.61e-08	7.36735e-10
3	0.000162857	-0.000124286	-2.85714e-05	-0.000122857	1.42857e-06	-4.85714e-05	0.00014	-2.71429e-05		3	0	0	0	0	0	0	0	0		0	0	0	0	0	0	0	0		0.000162857	-0.000124286	-2.85714e-05	-0.000122857	1.42857e-06	-4.85714e-05	0.00014	-2.71429e-05		2.65224e-08	1.54469e-08	8.16327e-10	1.50939e-08	2.04082e-12	2.35918e-09	1.96e-08	7.36735e-10
3.2	-8.71429e-05	0.000225714	2.14286e-05	7.71429e-05	0.000151429	1.42857e-06	4e-05	-7.71429e-05		3.2	0	0	0	0	0	0	0	0		0	0	0	0	0	0	0	0		-8.71429e-05	0.000225714	2.14286e-05	7.71429e-05	0.000151429	1.42857e-06	4e-05	-7.71429e-05		7.59388e-09	5.09469e-08	4.59184e-10	5.95102e-09	2.29306e-08	2.04082e-12	1.6e-09	5.95102e-09
3.4	-8.71429e-05	-2.42857e-05	-7.85714e-05	-2.28571e-05	-9.85714e-05	-9.85714e-05	0.00019	-2.71429e-05		3.4	0	0	0	0	0	0	0	0		0	0	0	0	0	0	0	0		-8.71429e-05	-2.42857e-05	-7.85714e-05	-2.28571e-05	-9.85714e-05	-9.85714e-05	0.00019	-2.71429e-05		7.59388e-09	5.89796e-10	6.17347e-09	5.22449e-10	9.71633e-09	9.71633e-09	3.61e-08	7.36735e-10
3.6	-8.71429e-05	2.57143e-05	-7.85714e-05	-0.000172857	-4.85714e-05	5.14286e-05	-1e-05	0.000172857		3.6	0	0	0	0	0	0	0	0		0	0	0	0	0	0	0	0		-8.71429e-05	2.57143e-05	-7.85714e-05	-0.000172857	-4.85714e-05	5.14286e-05	-1e-05	0.000172857		7.59388e-09	6.61224e-10	6.17347e-09	2.98796e-08	2.35918e-09	2.6449e-09	1e-10	2.98796e-08
3.8	1.28571e-05	-7.42857e-05	2.14286e-05	0.000127143	5.14286e-05	-4.85714e-05	-0.00011	-2.71429e-05		3.8	0	0	0	0	0	0	0	0		0	0	0	0	0	0	0	0		1.28571e-05	-7.42857e-05	2.14286e-05	0.000127143	5.14286e-05	-4.85714e-05	-0.00011	-2.71429e-05		1.65306e-10	5.51837e-09	4.59184e-10	1.61653e-08	2.6449e-09	2.35918e-09	1.21e-08	7.36735e-10
4	0.000312857	7.57143e-05	0.000271429	-7.28571e-05	-9.85714e-05	-0.000248571	9e-05	-2.71429e-05		4	0	0	0	0	0	0	0	0		0	0	0	0	0	0	0	0		0.000312857	7.57143e-05	0.000271429	-7.28571e-05	-9.85714e-05	-0.000248571	9e-05	-2.71429e-05		9.78796e-08	5.73265e-09	7.36735e-08	5.30816e-09	9.71633e-09	6.17878e-08	8.1e-09	7.36735e-10
4.2	-8.71429e-05	7.57143e-05	2.14286e-05	-7.28571e-05	-4.85714e-05	-9.85714e-05	0.00014	-0.000127143		4.2	0	0	0	0	0	0	0	0		0	0	0	0	0	0	0	0		-8.71429e-05	7.57143e-05	2.14286e-05	-7.28571e-05	-4.85714e-05	-9.85714e-05	0.00014	-0.000127143		7.59388e-09	5.73265e-09	4.59184e-10	5.30816e-09	2.35918e-09	9.71633e-09	1.96e-08	1.61653e-08
4.4	-3.71429e-05	-0.000174286	2.14286e-05	-2.28571e-05	-4.85714e-05	-4.85714e-05	-1e-05	0.000122857		4.4	0	0	0	0	0	0	0	0		0	0	0	0	0	0	0	0		-3.71429e-05	-0.000174286	2.14286e-05	-2.28571e-05	-4.85714e-05	-4.85714e-05	-1e-05	0.000122857		1.37959e-09	3.03755e-08	4.59184e-10	5.22449e-10	2.35918e-09	2.35918e-09	1e-10	1.50939e-08
4.6	-8.71429e-05	2.57143e-05	-7.85714e-05	-2.28571e-05	1.42857e-06	-4.85714e-05	-1e-05	-2.71429e-05		4.6	0	0	0	0	0	0	0	0		0	0	0	0	0	0	0	0		-8.71429e-05	2.57143e-05	-7.85714e-05	-2.28571e-05	1.42857e-06	-4.85714e-05	-1e-05	-2.71429e-05		7.59388e-09	6.61224e-10	6.17347e-09	5.22449e-10	2.04082e-12	2.35918e-09	1e-10	7.36735e-10
4.8	1.28571e-05	-2.42857e-05	-2.85714e-05	-0.000222857	-0.000148571	-4.85714e-05	9e-05	-7.71429e-05		4.8	0	0	0	0	0	0	0	0		0	0	0	0	0	0	0	0		1.28571e-05	-2.42857e-05	-2.85714e-05	-0.000222857	-0.000148571	-4.85714e-05	9e-05	-7.71429e-05		1.65306e-10	5.89796e-10	8.16327e-10	4.96653e-08	2.20735e-08	2.35918e-09	8.1e-09	5.95102e-09
5	0.000412857	-2.42857e-05	0.000121429	7.71429e-05	1.42857e-06	5.14286e-05	-6e-05	-0.000177143		5	0	0	0	0	0	0	0	0		0	0	0	0	0	0	0	0		0.000412857	-2.42857e-05	0.000121429	7.71429e-05	1.42857e-06	5.14286e-05	-6e-05	-0.000177143		1.70451e-07	5.89796e-10	1.47449e-08	5.95102e-09	2.04082e-12	2.6449e-09	3.6e-09	3.13796e-08
5.2	-0.000137143	7.57143e-05	-0.000128571	2.71429e-05	1.42857e-06	0.000201429	-6e-05	7.28571e-05		5.2	0	0	0	0	0	0	0	0		0	0	0	0	0	0	0	0		-0.000137143	7.57143e-05	-0.000128571	2.71429e-05	1.42857e-06	0.000201429	-6e-05	7.28571e-05		1.88082e-08	5.73265e-09	1.65306e-08	7.36735e-10	2.04082e-12	4.05735e-08	3.6e-09	5.30816e-09
5.4	-3.71429e-05	-7.42857e-05	-2.85714e-05	-0.000122857	0.000351429	-9.85714e-05	0.00014	2.28571e-05		5.4	0	0	0	0	0	0	0	0		0	0	0	0	0	0	0	0		-3.71429e-05	-7.42857e-05	-2.85714e-05	-0.000122857	0.000351429	-9.85714e-05	0.00014	2.28571e-05		1.37959e-09	5.51837e-09	8.16327e-10	1.50939e-08	1.23502e-07	9.71633e-09	1.96e-08	5.22449e-10
5.6	-8.71429e-05	-0.000124286	-7.85714e-05	2.71429e-05	-0.000198571	1.42857e-06	4e-05	-0.000127143		5.6	0	0	0	0	0	0	0	0		0	0	0	0	0	0	0	0		-8.71429e-05	-0.000124286	-7.85714e-05	2.71429e-05	-0.000198571	1.42857e-06	4e-05	-0.000127143		7.59388e-09	1.54469e-08	6.17347e-09	7.36735e-10	3.94306e-08	2.04082e-12	1.6e-09	1.61653e-08
5.8	-3.71429e-05	-0.000124286	-2.85714e-05	2.71429e-05	5.14286e-05	0.000301429	-6e-05	0.000272857		5.8	0	0	0	0	0	0	0	0		0	0	0	0	0	0	0	0		-3.71429e-05	-0.000124286	-2.85714e-05	2.71429e-05	5.14286e-05	0.000301429	-6e-05	0.000272857		1.37959e-09	1.54469e-08	8.16327e-10	7.36735e-10	2.6449e-09	9.08592e-08	3.6e-09	7.4451e-08
6	0.000162857	2.57143e-05	0.000121429	0.000177143	1.42857e-06	1.42857e-06	4e-05	7.28571e-05		6	0	0	0	0	0	0	0	0		0	0	0	0	0	0	0	0		0.000162857	2.57143e-05	0.000121429	0.000177143	1.42857e-06	1.42857e-06	4e-05	7.28571e-05		2.65224e-08	6.61224e-10	1.47449e-08	3.13796e-08	2.04082e-12	2.04082e-12	1.6e-09	5.30816e-09
6.2	-0.000187143	7.57143e-05	-0.000128571	-2.28571e-05	1.42857e-06	1.42857e-06	-0.00011	2.28571e-05		6.2	0	0	0	0	0	0	0	0		0	0	0	0	0	0	0	0		-0.000187143	7.57143e-05	-0.000128571	-2.28571e-05	1.42857e-06	1.42857e-06	-0.00011	2.28571e-05		3.50224e-08	5.73265e-09	1.65306e-08	5.22449e-10	2.04082e-12	2.04082e-12	1.21e-08	5.22449e-10
6.4	-8.71429e-05	-0.000174286	2.14286e-05	-0.000172857	-9.85714e-05	0.000151429	-0.00016	-0.000227143		6.4	0	0	0	0	0	0	0	0		0	0	0	0	0	0	0	0		-8.71429e-05	-0.000174286	2.14286e-05	-0.000172857	-9.85714e-05	0.000151429	-0.00016	-0.000227143		7.59388e-09	3.03755e-08	4.59184e-10	2.98796e-08	9.71633e-09	2.29306e-08	2.56e-08	5.15939e-08
6.6	-3.71429e-05	2.57143e-05	0.000421429	7.71429e-05	1.42857e-06	-0.000148571	0.00014	0.000122857		6.6	0	0	0	0	0	0	0	0		0	0	0	0	0	0	0	0		-3.71429e-05	2.57143e-05	0.000421429	7.71429e-05	1.42857e-06	-0.000148571	0.00014	0.000122857		1.37959e-09	6.61224e-10	1.77602e-07	5.95102e-09	2.04082e-12	2.20735e-08	1.96e-08	1.50939e-08
6.8	1.28571e-05	-7.42857e-05	-0.000128571	-2.28571e-05	0.000101429	0.000101429	4e-05	-2.71429e-05		6.8	0	0	0	0	0	0	0	0		0	0	0	0	0	0	0	0		1.28571e-05	-7.42857e-05	-0.000128571	-2.28571e-05	0.000101429	0.000101429	4e-05	-2.71429e-05		1.65306e-10	5.51837e-09	1.65306e-08	5.22449e-10	1.02878e-08	1.02878e-08	1.6e-09	7.36735e-10
7	0.000112857	-0.000124286	-2.85714e-05	-0.000122857	-0.000198571	0.000101429	9e-05	-7.71429e-05		7	0	0	0	0	0	0	0	0		0	0	0	0	0	0	0	0		0.000112857	-0.000124286	-2.85714e-05	-0.000122857	-0.000198571	0.000101429	9e-05	-7.71429e-05		1.27367e-08	1.54469e-08	8.16327e-10	1.50939e-08	3.94306e-08	1.02878e-08	8.1e-09	5.95102e-09
7.2	-0.000187143	7.57143e-05	-0.000178571	0.000127143	-4.85714e-05	-0.000148571	-1e-05	-0.000227143		7.2	0	0	0	0	0	0	0	0		0	0	0	0	0	0	0	0		-0.000187143	7.57143e-05	-0.000178571	0.000127143	-4.85714e-05	-0.000148571	-1e-05	-0.000227143		3.50224e-08	5.73265e-09	3.18878e-08	1.61653e-08	2.35918e-09	2.20735e-08	1e-10	5.15939e-08
7.4	-8.71429e-05	-0.000124286	-2.85714e-05	-7.28571e-05	1.42857e-06	5.14286e-05	-0.00011	7.28571e-05		7.4	0	0	0	0	0	0	0	0		0	0	0	0	0	0	0	0		-8.71429e-05	-0.000124286	-2.85714e-05	-7.28571e-05	1.42857e-06	5.14286e-05	-0.00011	7.28571e-05		7.59388e-09	1.54469e-08	8.16327e-10	5.30816e-09	2.04082e-12	2.6449e-09	1.21e-08	5.30816e-09
7.6	-3.71429e-05	-7.42857e-05	0.000121429	-0.000172857	5.14286e-05	0.000201429	-0.00011	-0.000127143		7.6	0	0	0	0	0	0	0	0		0	0	0	0	0	0	0	0		-3.71429e-05	-7.42857e-05	0.000121429	-0.000172857	5.14286e-05	0.000201429	-0.00011	-0.000127143		1.37959e-09	5.51837e-09	1.47449e-08	2.98796e-08	2.6449e-09	4.05735e-08	1.21e-08	1.61653e-08
7.8	1.28571e-05	-0.000224286	-2.85714e-05	-2.28571e-05	-0.000148571	-4.85714e-05	9e-05	-7.71429e-05		7.8	0	0	0	0	0	0	0	0		0	0	0	0	0	0	0	0		1.28571e-05	-0.000224286	-2.85714e-05	-2.28571e-05	-0.000148571	-4.85714e-05	9e-05	-7.71429e-05		1.65306e-10	5.03041e-08	8.16327e-10	5.22449e-10	2.20735e-08	2.35918e-09	8.1e-09	5.95102e-09
8	0.000162857	2.57143e-05	2.14286e-05	2.71429e-05	1.42857e-06	5.14286e-05	-1e-05	-7.71429e-05		8	0	0	0	0	0	0	0	0		0	0	0	0	0	0	0	0		0.000162857	2.57143e-05	2.14286e-05	2.71429e-05	1.42857e-06	5.14286e-05	-1e-05	-7.71429e-05		2.65224e-08	6.61224e-10	4.59184e-10	7.36735e-10	2.04082e-12	2.6449e-09	1e-10	5.95102e-09
8.2	-0.000187143	-2.42857e-05	-7.85714e-05	-0.000122857	1.42857e-06	5.14286e-05	-6e-05	7.28571e-05		8.2	0	0	0	0	0	0	0	0		0	0	0	0	0	0	0	0		-0.000187143	-2.42857e-05	-7.85714e-05	-0.000122857	1.42857e-06	5.14286e-05	-6e-05	7.28571e-05		3.50224e-08	5.89796e-10	6.17347e-09	1.50939e-08	2.04082e-12	2.6449e-09	3.6e-09	5.30816e-09
8.4	-3.71429e-05	-0.000174286	2.14286e-05	7.71429e-05	0.000251429	-0.000148571	-1e-05	-0.000127143		8.4	0	0	0	0	0	0	0	0		0	0	0	0	0	0	0	0		-3.71429e-05	-0.000174286	2.14286e-05	7.71429e-05	0.000251429	-0.000148571	-1e-05	-0.000127143		1.37959e-09	3.03755e-08	4.59184e-10	5.95102e-09	6.32163e-08	2.20735e-08	1e-10	1.61653e-08
8.6	1.28571e-05	-2.42857e-05	7.14286e-05	-0.000122857	-0.000148571	0.000151429	-0.00011	-0.000127143		8.6	0	0	0	0	0	0	0	0		0	0	0	0	0	0	0	0		1.28571e-05	-2.42857e-05	7.14286e-05	-0.000122857	-0.000148571	0.000151429	-0.00011	-0.000127143		1.65306e-10	5.89796e-10	5.10204e-09	1.50939e-08	2.20735e-08	2.29306e-08	1.21e-08	1.61653e-08
8.8	-3.71429e-05	-0.000124286	-0.000128571	-0.000222857	5.14286e-05	5.14286e-05	-0.00016	0.000172857		8.8	0	0	0	0	0	0	0	0		0	0	0	0	0	0	0	0		-3.71429e-05	-0.000124286	-0.000128571	-0.000222857	5.14286e-05	5.14286e-05	-0.00016	0.000172857		1.37959e-09	1.54469e-08	1.65306e-08	4.96653e-08	2.6449e-09	2.6449e-09	2.56e-08	2.98796e-08
9	0.000112857	-0.000124286	-0.000128571	2.71429e-05	5.14286e-05	5.14286e-05	0.00014	-2.71429e-05		9	0	0	0	0	0	0	0	0		0	0	0	0	0	0	0	0		0.000112857	-0.000124286	-0.000128571	2.71429e-05	5.14286e-05	5.14286e-05	0.00014	-2.71429e-05		1.27367e-08	1.54469e-08	1.65306e-08	7.36735e-10	2.6449e-09	2.6449e-09	1.96e-08	7.36735e-10
9.2	-0.000187143	0.000225714	0.000221429	2.71429e-05	-4.85714e-05	5.14286e-05	-1e-05	-7.71429e-05		9.2	0	0	0	0	0	0	0	0		0	0	0	0	0	0	0	0		-0.000187143	0.000225714	0.000221429	2.71429e-05	-4.85714e-05	5.14286e-05	-1e-05	-7.71429e-05		3.50224e-08	5.09469e-08	4.90306e-08	7.36735e-10	2.35918e-09	2.6449e-09	1e-10	5.95102e-09
9.4	-0.000137143	-7.42857e-05	-7.85714e-05	-0.000172857	-9.85714e-05	0.000101429	-6e-05	-0.000177143		9.4	0	0	0	0	0	0	0	0		0	0	0	0	0	0	0	0		-0.000137143	-7.42857e-05	-7.85714e-05	-0.000172857	-9.85714e-05	0.000101429	-6e-05	-0.000177143		1.88082e-08	5.51837e-09	6.17347e-09	2.98796e-08	9.71633e-09	1.02878e-08	3.6e-09	3.13796e-08
9.6	-3.71429e-05	-7.42857e-05	7.14286e-05	-7.28571e-05	-4.85714e-05	0.000401429	4e-05	0.000122857		9.6	0	0	0	0	0	0	0	0		0	0	0	0	0	0	0	0		-3.71429e-05	-7.42857e-05	7.14286e-05	-7.28571e-05	-4.85714e-05	0.000401429	4e-05	0.000122857		1.37959e-09	5.51837e-09	5.10204e-09	5.30816e-09	2.35918e-09	1.61145e-07	1.6e-09	1.50939e-08
9.8	1.28571e-05	-0.000274286	-0.000228571	-0.000172857	5.14286e-05	1.42857e-06	-0.00011	-7.71429e-05		9.8	0	0	0	0	0	0	0	0		0	0	0	0	0	0	0	0		1.28571e-05	-0.000274286	-0.000228571	-0.000172857	5.14286e-05	1.42857e-06	-0.00011	-7.71429e-05		1.65306e-10	7.52327e-08	5.22449e-08	2.98796e-08	2.6449e-09	2.04082e-12	1.21e-08	5.95102e-09
10	0.000112857	-2.42857e-05	2.14286e-05	-7.28571e-05	-0.000148571	5.14286e-05	-0.00016	-7.71429e-05		10	0	0	0	0	0	0	0	0		0	0	0	0	0	0	0	0		0.000112857	-2.42857e-05	2.14286e-05	-7.28571e-05	-0.000148571	5.14286e-05	-0.00016	-7.71429e-05		1.27367e-08	5.89796e-10	4.59184e-10	5.30816e-09	2.20735e-08	2.6449e-09	2.56e-08	5.95102e-09
10.2	-0.000187143	-0.000174286	0.000121429	-7.28571e-05	-9.85714e-05	0.000201429	0.00029	-0.000177143		10.2	0	0	0	0	0	0	0	0		0	0	0	0	0	0	0	0		-0.000187143	-0.000174286	0.000121429	-7.28571e-05	-9.85714e-05	0.000201429	0.00029	-0.000177143		3.50224e-08	3.03755e-08	1.47449e-08	5.30816e-09	9.71633e-09	4.05735e-08	8.41e-08	3.13796e-08
10.4	-8.71429e-05	-0.000224286	-2.85714e-05	-7.28571e-05	1.42857e-06	-0.000148571	4e-05	7.28571e-05		10.4	0	0	0	0	0	0	0	0		0	0	0	0	0	0	0	0		-8.71429e-05	-0.000224286	-2.85714e-05	-7.28571e-05	1.42857e-06	-0.000148571	4e-05	7.28571e-05		7.59388e-09	5.03041e-08	8.16327e-10	5.30816e-09	2.04082e-12	2.20735e-08	1.6e-09	5.30816e-09
10.6	-0.000187143	-2.42857e-05	2.14286e-05	0.000277143	5.14286e-05	5.14286e-05	-6e-05	-2.71429e-05		10.6	0	0	0	0	0	0	0	0		0	0	0	0	0	0	0	0		-0.000187143	-2.42857e-05	2.14286e-05	0.000277143	5.14286e-05	5.14286e-05	-6e-05	-2.71429e-05		3.50224e-08	5.89796e-10	4.59184e-10	7.68082e-08	2.6449e-09	2.6449e-09	3.6e-09	7.36735e-10
10.8	-8.71429e-05	-0.000174286	-7.85714e-05	-7.28571e-05	-0.000148571	5.14286e-05	-0.00011	-7.71429e-05		10.8	0	0	0	0	0	0	0	0		0	0	0	0	0	0	0	0		-8.71429e-05	-0.000174286	-7.85714e-05	-7.28571e-05	-0.000148571	5.14286e-05	-0.00011	-7.71429e-05		7.59388e-09	3.03755e-08	6.17347e-09	5.30816e-09	2.20735e-08	2.6449e-09	1.21e-08	5.95102e-09
11	6.28571e-05	-0.000174286	2.14286e-05	-0.000172857	-0.000148571	-9.85714e-05	-0.00011	0.000172857		11	0	0	0	0	0	0	0	0		0	0	0	0	0	0	0	0		6.28571e-05	-0.000174286	2.14286e-05	-0.000172857	-0.000148571	-9.85714e-05	-0.00011	0.000172857		3.95102e-09	3.03755e-08	4.59184e-10	2.98796e-08	2.20735e-08	9.71633e-09	1.21e-08	2.98796e-08
11.2	-0.000187143	2.57143e-05	2.14286e-05	7.71429e-05	-4.85714e-05	0.000151429	-0.00021	-2.71429e-05		11.2	0	0	0	0	0	0	0	0		0	0	0	0	0	0	0	0		-0.000187143	2.57143e-05	2.14286e-05	7.71429e-05	-4.85714e-05	0.000151429	-0.00021	-2.71429e-05		3.50224e-08	6.61224e-10	4.59184e-10	5.95102e-09	2.35918e-09	2.29306e-08	4.41e-08	7.36735e-10
11.4	-0.000137143	-0.000124286	-0.000128571	-2.28571e-05	0.000201429	0.000201429	9e-05	-2.71429e-05		11.4	0	0	0	0	0	0	0	0		0	0	0	0	0	0	0	0		-0.000137143	-0.000124286	-0.000128571	-2.28571e-05	0.000201429	0.000201429	9e-05	-2.71429e-05		1.88082e-08	1.54469e-08	1.65306e-08	5.22449e-10	4.05735e-08	4.05735e-08	8.1e-09	7.36735e-10
11.6	-3.71429e-05	-7.42857e-05	2.14286e-05	-2.28571e-05	-0.000148571	-0.000198571	4e-05	-0.000127143		11.6	0	0	0	0	0	0	0	0		0	0	0	0	0	0	0	0		-3.71429e-05	-7.42857e-05	2.14286e-05	-2.28571e-05	-0.000148571	-0.000198571	4e-05	-0.000127143		1.37959e-09	5.51837e-09	4.59184e-10	5.22449e-10	2.20735e-08	3.94306e-08	1.6e-09	1.61653e-08
11.8	-8.71429e-05	-0.000174286	0.000171429	0.000127143	5.14286e-05	-4.85714e-05	-6e-05	7.28571e-05		11.8	0	0	0	0	0	0	0	0		0	0	0	0	0	0	0	0		-8.71429e-05	-0.000174286	0.000171429	0.000127143	5.14286e-05	-4.85714e-05	-6e-05	7.28571e-05		7.59388e-09	3.03755e-08	2.93878e-08	1.61653e-08	2.6449e-09	2.35918e-09	3.6e-09	5.30816e-09
12	0.00181286	0.0145757	-2.85714e-05	-0.000122857	1.42857e-06	0.000101429	-1e-05	-7.71429e-05		12	0	0	0	0	0	0	0	0		0	0	0	0	0	0	0	0		0.00181286	0.0145757	-2.85714e-05	-0.000122857	1.42857e-06	0.000101429	-1e-05	-7.71429e-05		3.28645e-06	0.000212451	8.16327e-10	1.50939e-08	2.04082e-12	1.02878e-08	1e-10	5.95102e-09
12.2	0.0119629	0.0149757	2.14286e-05	-0.000172857	-4.85714e-05	-4.85714e-05	-6e-05	-2.71429e-05		12.2	0	0.0302	0	0	0	0	0	0		0	0.0302	0	0	0	0	0	0		0.0119629	-0.0152243	2.14286e-05	-0.000172857	-4.85714e-05	-4.85714e-05	-6e-05	-2.71429e-05		0.00014311	0.000231779	4.59184e-10	2.98796e-08	2.35918e-09	2.35918e-09	3.6e-09	7.36735e-10
12.4	0.0120129	0.0183757	0.0126714	2.71429e-05	-9.85714e-05	1.42857e-06	-0.00016	-0.000127143		12.4	0.0331	0.0775	0	0	0	0	0	0		0.0331	0.0699	0	0	0	0	0	0		-0.0210871	-0.0591243	0.0126714	2.71429e-05	-9.85714e-05	1.42857e-06	-0.00016	-0.000127143		0.000444668	0.00349568	0.000160565	7.36735e-10	9.71633e-09	2.04082e-12	2.56e-08	1.61653e-08
12.6	0.0138129	0.0233257	0.0212714	-2.28571e-05	1.42857e-06	1.42857e-06	-0.00011	0.000172857		12.6	0.0331	0.0824	0.0423	0	0	0	0	0		0.0335	0.0777	0.0405	0	0	0	0	0		-0.0192871	-0.0590743	-0.0210286	-2.28571e-05	1.42857e-06	1.42857e-06	-0.00011	0.000172857		0.000371994	0.00348977	0.000442201	5.22449e-10	2.04082e-12	2.04082e-12	1.21e-08	2.98796e-08
12.8	0.0157129	0.0307757	0.0209714	0.000477143	1.42857e-06	-0.000148571	-1e-05	-2.71429e-05		12.8	0.0585	0.0768	0.0336	0	0	0	0	0		0.0587	0.0776	0.0344	0	0	0	0	0		-0.0427871	-0.0460243	-0.0126286	0.000477143	1.42857e-06	-0.000148571	-1e-05	-2.71429e-05		0.00183074	0.00211823	0.000159481	2.27665e-07	2.04082e-12	2.20735e-08	1e-10	7.36735e-10
13	0.0180129	0.0427757	0.0203214	0.00172714	0.00270143	0.0158514	-6e-05	-7.71429e-05		13	0.0631	0.0775	0.0328	0	0	0	0	0		0.0626	0.0777	0.033	0	0	0	0	0		-0.0450871	-0.0347243	-0.0124786	0.00172714	0.00270143	0.0158514	-6e-05	-7.71429e-05		0.00203285	0.00120578	0.000155715	2.98302e-06	7.29772e-06	0.000251268	3.6e-09	5.95102e-09
13.2	0.0205129	0.0415257	0.0204214	0.00387714	0.0107014	0.0179514	-1e-05	-0.000227143		13.2	0.0695	0.0834	0.0353	0.0158	0	0	0	0		0.0678	0.084	0.0351	0.0169	0	0	0	0		-0.0489871	-0.0418743	-0.0148786	-0.0119229	0.0107014	0.0179514	-1e-05	-0.000227143		0.00239974	0.00175346	0.000221372	0.000142155	0.000114521	0.000322254	1e-10	5.15939e-08
13.4	0.0219629	0.0423757	0.0232214	0.0100771	0.00880143	0.0181514	0.00174	2.28571e-05		13.4	0.0713	0.0863	0.0394	0.0061	0	0.0389	0	0		0.0712	0.0842	0.0382	0.0059	0	0.0385	0	0		-0.0493371	-0.0439243	-0.0161786	0.00397714	0.00880143	-0.0207486	0.00174	2.28571e-05		0.00243415	0.00192934	0.000261746	1.58177e-05	7.74651e-05	0.000430503	3.0276e-06	5.22449e-10
13.6	0.0294129	0.0411257	0.0261214	0.0127771	0.0109514	0.0198514	0.00724	-7.71429e-05		13.6	0.0737	0.0883	0.0479	0.035	0.0303	0.0385	0	0		0.0727	0.0874	0.045	0.0371	0.0151	0.0355	0	0		-0.0442871	-0.0471743	-0.0217786	-0.0222229	-0.0193486	-0.0186486	0.00724	-7.71429e-05		0.00196135	0.00222541	0.000474306	0.000493855	0.000374367	0.000347769	5.24176e-05	5.95102e-09
13.8	0.0361129	0.0456257	0.0281214	0.0184771	0.0135514	0.0186514	0.01529	0.00312286		13.8	0.0759	0.088	0.0499	0.0351	0.027	0.0445	0.0079	0		0.0756	0.0873	0.0494	0.0339	0.0251	0.0411	0.0096	0		-0.0397871	-0.0423743	-0.0217786	-0.0166229	-0.0134486	-0.0258486	0.00739	0.00312286		0.00158302	0.00179558	0.000474306	0.000276319	0.000180864	0.000668149	5.46121e-05	9.75224e-06
14	0.0414129	0.0468757	0.0297714	0.0158271	0.0144014	0.0226514	0.01809	0.0134229		14	0.0788	0.0876	0.0467	0.0325	0.0314	0.0496	0.0073	0		0.0777	0.0868	0.047	0.0328	0.0306	0.0487	0.0066	0		-0.0373871	-0.0407243	-0.0169286	-0.0166729	-0.0169986	-0.0269486	0.01079	0.0134229		0.0013978	0.00165847	0.000286577	0.000277984	0.000288951	0.000726226	0.000116424	0.000180173
14.2	0.0452629	0.0526257	0.0318714	0.0256771	0.0214014	0.0243014	0.02174	0.0151229		14.2	0.0795	0.0896	0.0463	0.0352	0.0357	0.0509	0.0323	0		0.0792	0.0886	0.046	0.0321	0.0336	0.048	0.0331	0		-0.0342371	-0.0369743	-0.0144286	-0.00952286	-0.0142986	-0.0265986	-0.01056	0.0151229		0.00117218	0.0013671	0.000208184	9.06848e-05	0.000204449	0.000707484	0.000111514	0.000228701
14.4	0.0578129	0.0596757	0.0333214	0.0330271	0.0226014	0.0263514	0.01599	0.0173729		14.4	0.08	0.0899	0.0477	0.0391	0.0427	0.0541	0.0349	0		0.079	0.0894	0.0473	0.0354	0.0389	0.0502	0.0336	0		-0.0221871	-0.0302243	-0.0143786	-0.00607286	-0.0200986	-0.0277486	-0.01891	0.0173729		0.000492269	0.000913507	0.000206743	3.68796e-05	0.000403953	0.000769983	0.000357588	0.000301816
14.6	0.0571129	0.0677257	0.0358214	0.0283271	0.0248514	0.0271514	0.01479	0.0209229		14.6	0.082	0.0893	0.0488	0.0403	0.0458	0.0555	0.0339	0.0236		0.0802	0.0891	0.0482	0.0386	0.0441	0.0519	0.0326	0.0232		-0.0248871	-0.0215743	-0.0129786	-0.0119729	-0.0209486	-0.0283486	-0.01911	-0.00267714		0.00061937	0.00046545	0.000168443	0.000143349	0.000438843	0.000803642	0.000365192	7.16709e-06
14.8	0.0652129	0.0858257	0.0331214	0.0296271	0.0264014	0.0394014	0.01759	0.0237729		14.8	0.0826	0.0891	0.0497	0.042	0.0448	0.0558	0.0363	0.0262		0.0814	0.0888	0.0493	0.0401	0.0433	0.0534	0.0335	0.0252		-0.0173871	-0.00327429	-0.0165786	-0.0123729	-0.0183986	-0.0163986	-0.01871	-0.00242714		0.000302313	1.07209e-05	0.000274849	0.000153088	0.000338507	0.000268913	0.000350064	5.89102e-06
15	0.0630129	0.0956257	0.0308214	0.0314771	0.0330014	0.0434014	0.01979	0.0276729		15	0.0819	0.0883	0.0506	0.0436	0.0467	0.0578	0.0386	0.0264		0.0811	0.0878	0.0494	0.0415	0.0436	0.0527	0.0338	0.0247		-0.0188871	0.00732571	-0.0197786	-0.0121229	-0.0136986	-0.0143986	-0.01881	0.00127286		0.000356724	5.36661e-05	0.000391192	0.000146964	0.000187651	0.000207319	0.000353816	1.62017e-06
15.2	0.0699629	0.105226	0.0323714	0.0381771	0.0268514	0.0451514	0.02119	0.0298229		15.2	0.0804	0.0873	0.0519	0.0444	0.046	0.0589	0.0423	0.0223		0.0797	0.0867	0.0501	0.0424	0.0441	0.0543	0.0359	0.0215		-0.0104371	0.0179257	-0.0195286	-0.00622286	-0.0191486	-0.0137486	-0.02111	0.00752286		0.000108934	0.000321331	0.000381365	3.8724e-05	0.000366668	0.000189023	0.000445632	5.65934e-05
15.4	0.0670629	0.111276	0.0336214	0.0333271	0.0289014	0.0470514	0.02349	0.0261229		15.4	0.0785	0.0867	0.0526	0.0444	0.0479	0.0596	0.0421	0.0243		0.0781	0.0861	0.0509	0.0428	0.0442	0.0548	0.0388	0.0209		-0.0114371	0.0245757	-0.0189786	-0.0110729	-0.0189986	-0.0125486	-0.01861	0.00182286		0.000130808	0.000603966	0.000360186	0.000122608	0.000360946	0.000157467	0.000346332	3.32281e-06
15.6	0.0702629	0.0845257	0.0345214	0.0340271	0.0351514	0.0388514	0.02554	0.0298729		15.6	0.077	0.0859	0.0523	0.045	0.0468	0.0595	0.041	0.0257		0.0769	0.0854	0.0513	0.0429	0.0444	0.0554	0.039	0.025		-0.00673714	-0.00137429	-0.0177786	-0.0109729	-0.0116486	-0.0206486	-0.01546	0.00417286		4.53891e-05	1.88866e-06	0.000316078	0.000120404	0.000135689	0.000426364	0.000239012	1.74127e-05
15.8	0.0677629	0.0775257	0.0302714	0.0325771	0.0311514	0.0436514	0.02524	0.0307729		15.8	0.076	0.0847	0.0522	0.046	0.0472	0.0592	0.0417	0.0257		0.0756	0.084	0.051	0.0438	0.0438	0.0551	0.0385	0.0251		-0.00823714	-0.00717429	-0.0219286	-0.0134229	-0.0160486	-0.0155486	-0.01646	0.00507286		6.78505e-05	5.14704e-05	0.000480862	0.000180173	0.000257557	0.000241758	0.000270932	2.57339e-05
16	0.0772129	0.0747757	0.0344714	0.0393771	0.0330514	0.0485514	0.02714	0.0331729		16	0.0757	0.0843	0.0526	0.0467	0.047	0.0589	0.044	0.0251		0.075	0.0837	0.0509	0.0446	0.0437	0.0551	0.0385	0.0253		0.00151286	-0.00952429	-0.0181286	-0.00732286	-0.0139486	-0.0103486	-0.01686	0.00807286		2.28874e-06	9.0712e-05	0.000328645	5.36242e-05	0.000194563	0.000107093	0.00028426	6.5171e-05
16.2	0.0789129	0.0709757	0.0347714	0.0442771	0.0382014	0.0618514	0.02834	0.0332729		16.2	0.0757	0.0836	0.0521	0.0467	0.0469	0.058	0.046	0.025		0.0752	0.0832	0.0507	0.0451	0.0443	0.0544	0.0398	0.0245		0.00321286	-0.0126243	-0.0173286	-0.00242286	-0.00869857	0.00385143	-0.01766	0.00827286		1.03225e-05	0.000159373	0.000300279	5.87024e-06	7.56651e-05	1.48335e-05	0.000311876	6.84402e-05
16.4	0.0774629	0.0811757	0.0324214	0.0332771	0.0400014	0.0634014	0.03359	0.0343229		16.4	0.075	0.0832	0.0516	0.0469	0.0469	0.0572	0.0455	0.0257		0.0746	0.0827	0.0501	0.0452	0.0446	0.0537	0.0411	0.0247		0.00246286	-0.00202429	-0.0191786	-0.0136229	-0.00689857	0.00620143	-0.01191	0.00862286		6.06567e-06	4.09773e-06	0.000367818	0.000185582	4.75903e-05	3.84577e-05	0.000141848	7.43537e-05
16.6	0.0761629	0.0817757	0.0313214	0.0425271	0.0402014	0.0418514	0.03634	0.0313229		16.6	0.0745	0.0832	0.0517	0.047	0.0464	0.0568	0.0454	0.0265		0.074	0.0827	0.0498	0.0452	0.0446	0.0533	0.0409	0.0255		0.00166286	-0.00142429	-0.0203786	-0.00447286	-0.00619857	-0.0149486	-0.00906	0.00482286		2.76509e-06	2.02859e-06	0.000415286	2.00065e-05	3.84223e-05	0.00022346	8.20836e-05	2.326e-05
16.8	0.0771129	0.0824257	0.0332714	0.0389271	0.0362014	0.0499514	0.03419	0.0316729		16.8	0.0741	0.0833	0.052	0.0466	0.0464	0.0569	0.0458	0.0262		0.0738	0.0828	0.0499	0.0453	0.0444	0.0528	0.041	0.0253		0.00301286	-0.000874286	-0.0187286	-0.00767286	-0.0101986	-0.00694857	-0.01161	0.00547286		9.07731e-06	7.64376e-07	0.000350759	5.88727e-05	0.000104011	4.82826e-05	0.000134792	2.99522e-05
17	0.0729629	0.0762257	0.0321214	0.0473271	0.0393514	0.0537514	0.03439	0.0324229		17	0.074	0.0833	0.0527	0.0468	0.0458	0.0564	0.0465	0.0258		0.0733	0.0828	0.0503	0.0453	0.0442	0.0531	0.0415	0.0254		-0.00103714	-0.00707429	-0.0205786	0.000527143	-0.00644857	-0.00264857	-0.01211	0.00662286		1.07567e-06	5.00455e-05	0.000423478	2.7788e-07	4.15841e-05	7.01493e-06	0.000146652	4.38622e-05
17.2	0.0750129	0.0799757	0.0358214	0.0399271	0.0415014	0.0636014	0.03454	0.0307229		17.2	0.0739	0.0826	0.0528	0.0468	0.0456	0.0563	0.0467	0.0255		0.0731	0.0824	0.0508	0.0453	0.0443	0.0529	0.0422	0.0247		0.00111286	-0.00262429	-0.0169786	-0.00687286	-0.00409857	0.00730143	-0.01216	0.00522286		1.23845e-06	6.88688e-06	0.000288272	4.72362e-05	1.67983e-05	5.33109e-05	0.000147866	2.72782e-05
17.4	0.0708629	0.0837757	0.0352214	0.0432771	0.0432514	0.0693514	0.03829	0.0321729		17.4	0.0737	0.0817	0.0523	0.047	0.0453	0.0558	0.0465	0.0248		0.073	0.0815	0.051	0.0453	0.0443	0.0527	0.0425	0.0244		-0.00283714	0.00207571	-0.0170786	-0.00372286	-0.00204857	0.0135514	-0.00821	0.00737286		8.04938e-06	4.30859e-06	0.000291678	1.38597e-05	4.19664e-06	0.000183641	6.74041e-05	5.4359e-05
17.6	0.0708629	0.0842257	0.0340714	0.0421271	0.0461014	0.0547014	0.03414	0.0338229		17.6	0.0734	0.0809	0.0522	0.0471	0.0453	0.0559	0.0463	0.0241		0.0728	0.0806	0.0511	0.0455	0.0442	0.0526	0.0426	0.0248		-0.00253714	0.00332571	-0.0181286	-0.00497286	0.000801429	-0.00119857	-0.01216	0.00972286		6.43709e-06	1.10604e-05	0.000328645	2.47293e-05	6.42288e-07	1.43657e-06	0.000147866	9.4534e-05
17.8	0.0729629	0.0819257	0.0336214	0.0453771	0.0394514	0.0497514	0.04119	0.0291229		17.8	0.0729	0.08	0.0524	0.0472	0.0456	0.0556	0.0469	0.0266		0.0724	0.0796	0.0511	0.0455	0.0442	0.0524	0.0428	0.0251		6.28571e-05	0.00192571	-0.0187786	-0.00182286	-0.00614857	-0.00584857	-0.00571	0.00252286		3.95102e-09	3.70838e-06	0.000352635	3.32281e-06	3.78049e-05	3.42058e-05	3.26041e-05	6.36481e-06
18	0.0697129	0.0762757	0.0375214	0.0404271	0.0399014	0.0540514	0.04054	0.0290729		18	0.0724	0.0794	0.0527	0.0473	0.0457	0.0551	0.0481	0.0288		0.072	0.0789	0.0511	0.0456	0.0442	0.0521	0.0435	0.0251		-0.00268714	-0.00312429	-0.0151786	-0.00687286	-0.00579857	-0.00104857	-0.00756	0.000272857		7.22074e-06	9.76116e-06	0.000230389	4.72362e-05	3.36234e-05	1.0995e-06	5.71536e-05	7.4451e-08
18.2	0.0742629	0.0809757	0.0325714	0.0507771	0.0393014	0.0642014	0.04084	0.0342229		18.2	0.0721	0.0796	0.0526	0.0476	0.0459	0.0547	0.0484	0.0286		0.0717	0.0786	0.0511	0.0457	0.0442	0.0518	0.0445	0.0255		0.00216286	0.00137571	-0.0200286	0.00317714	-0.00659857	0.00950143	-0.00756	0.00562286		4.67795e-06	1.89259e-06	0.000401144	1.00942e-05	4.35411e-05	9.02771e-05	5.71536e-05	3.16165e-05
18.4	0.0737629	0.0815257	0.0325714	0.0409771	0.0416514	0.0710014	0.04294	0.0291729		18.4	0.0721	0.0796	0.0524	0.0476	0.0456	0.0547	0.0487	0.026		0.0717	0.0788	0.0513	0.0456	0.0442	0.0514	0.0451	0.0258		0.00166286	0.00192571	-0.0198286	-0.00662286	-0.00394857	0.0163014	-0.00576	0.00317286		2.76509e-06	3.70838e-06	0.000393172	4.38622e-05	1.55912e-05	0.000265737	3.31776e-05	1.0067e-05
18.6	0.0740629	0.0788257	0.0320214	0.0417771	0.0400014	0.0601014	0.03824	0.0300729		18.6	0.0723	0.0797	0.0521	0.0473	0.0456	0.0549	0.049	0.0277		0.0717	0.079	0.0511	0.0457	0.044	0.0511	0.0456	0.0262		0.00176286	-0.000874286	-0.0200786	-0.00552286	-0.00559857	0.00520143	-0.01076	0.00237286		3.10767e-06	7.64376e-07	0.000403149	3.0502e-05	3.1344e-05	2.70549e-05	0.000115778	5.63045e-06
18.8	0.0743129	0.0785257	0.0317714	0.0413271	0.0428514	0.0538514	0.04364	0.0309729		18.8	0.0726	0.0797	0.052	0.0472	0.0454	0.0551	0.0496	0.0274		0.0719	0.0792	0.0512	0.0458	0.0441	0.0515	0.0459	0.0262		0.00171286	-0.00117429	-0.0202286	-0.00587286	-0.00254857	-0.00124857	-0.00596	0.00357286		2.93388e-06	1.37895e-06	0.000409195	3.44905e-05	6.49522e-06	1.55893e-06	3.55216e-05	1.27653e-05
19	0.0730629	0.0849757	0.0327714	0.0526771	0.0372014	0.0570514	0.04139	0.0302729		19	0.0724	0.0799	0.0519	0.0476	0.0454	0.0553	0.0502	0.0273		0.0718	0.0791	0.0513	0.0459	0.0441	0.0518	0.0461	0.0259		0.000662857	0.00507571	-0.0191286	0.00507714	-0.00819857	0.00175143	-0.00881	0.00297286		4.3938e-07	2.57629e-05	0.000365902	2.57774e-05	6.72166e-05	3.0675e-06	7.76161e-05	8.83788e-06
19.2	0.0711129	0.0779757	0.0355214	0.0408771	0.0432014	0.0669014	0.03859	0.0340729		19.2	0.0723	0.0799	0.0517	0.0482	0.0454	0.0555	0.0498	0.0282		0.0719	0.0791	0.0513	0.046	0.044	0.0522	0.0463	0.026		-0.00118714	-0.00192429	-0.0161786	-0.00732286	-0.00219857	0.0114014	-0.01121	0.00587286		1.40931e-06	3.70288e-06	0.000261746	5.36242e-05	4.83372e-06	0.000129993	0.000125664	3.44905e-05
19.4	0.0724629	0.0750757	0.0300214	0.0425771	0.0384514	0.0736014	0.04249	0.0312729		19.4	0.0719	0.0796	0.0516	0.0483	0.0456	0.0557	0.0496	0.0302		0.0714	0.079	0.0514	0.0462	0.0442	0.0525	0.0463	0.0266		0.000562857	-0.00452429	-0.0215786	-0.00572286	-0.00714857	0.0179014	-0.00711	0.00107286		3.16808e-07	2.04692e-05	0.000465635	3.27511e-05	5.11021e-05	0.000320461	5.05521e-05	1.15102e-06
19.6	0.0699129	0.0842257	0.0302714	0.0423271	0.0482014	0.0530014	0.04449	0.0293729		19.6	0.0716	0.0793	0.0521	0.0483	0.0457	0.0556	0.0498	0.0323		0.0711	0.0788	0.0514	0.0463	0.0443	0.0527	0.0468	0.0274		-0.00168714	0.00492571	-0.0218286	-0.00597286	0.00250143	-0.00259857	-0.00531	-0.00292714		2.84645e-06	2.42627e-05	0.000476487	3.5675e-05	6.25714e-06	6.75257e-06	2.81961e-05	8.56817e-06
19.8	0.0704629	0.0813757	0.0324714	0.0427771	0.0452014	0.0497514	0.04469	0.0366229		19.8	0.0712	0.0789	0.0525	0.0482	0.046	0.0554	0.0501	0.0314		0.0707	0.0785	0.0514	0.0466	0.0445	0.0525	0.0475	0.0279		-0.000737143	0.00247571	-0.0200286	-0.00542286	-0.000798571	-0.00564857	-0.00541	0.00522286		5.4338e-07	6.12916e-06	0.000401144	2.94074e-05	6.37716e-07	3.19064e-05	2.92681e-05	2.72782e-05
20	0.0717629	0.0910757	0.0322214	0.0452771	0.0421514	0.0529014	0.04289	0.0306729		20	0.0708	0.0785	0.0527	0.0481	0.046	0.0554	0.0505	0.0292		0.0703	0.0781	0.0516	0.0468	0.0446	0.0521	0.0478	0.0273		0.000962857	0.0125757	-0.0204786	-0.00282286	-0.00384857	-0.00249857	-0.00761	0.00147286		9.27094e-07	0.000158149	0.000419372	7.96852e-06	1.48115e-05	6.24286e-06	5.79121e-05	2.16931e-06
20.2	0.0725129	0.0865757	0.0305714	0.0416771	0.0406514	0.0665014	0.04224	0.0273729		20.2	0.0705	0.0779	0.0523	0.0477	0.0458	0.0559	0.0517	0.0315		0.07	0.0775	0.0517	0.0468	0.0446	0.0519	0.0476	0.0263		0.00201286	0.00867571	-0.0217286	-0.00602286	-0.00514857	0.0106014	-0.00946	-0.00412714		4.05159e-06	7.5268e-05	0.000472131	3.62748e-05	2.65078e-05	0.00011239	8.94916e-05	1.70333e-05
20.4	0.0702629	0.0827757	0.0291214	0.0471271	0.0410514	0.0609014	0.04319	0.0306229		20.4	0.0702	0.0772	0.0515	0.0474	0.0456	0.0563	0.0524	0.033		0.0697	0.077	0.0514	0.0466	0.0444	0.0519	0.0472	0.0271		6.28571e-05	0.00557571	-0.0223786	-0.000272857	-0.00454857	0.00460143	-0.00921	-0.00237714		3.95102e-09	3.10886e-05	0.0005008	7.4451e-08	2.06895e-05	2.11731e-05	8.48241e-05	5.65081e-06
20.6	0.0706629	0.0781757	0.0301714	0.0368271	0.0390014	0.0530014	0.04664	0.0311729		20.6	0.0697	0.0765	0.0508	0.0475	0.0456	0.0561	0.0519	0.0295		0.0693	0.0762	0.0509	0.0463	0.0442	0.0522	0.0475	0.0284		0.000962857	0.00167571	-0.0206286	-0.0106729	-0.00659857	-0.00309857	-0.00526	0.00167286		9.27094e-07	2.80802e-06	0.000425538	0.00011391	4.35411e-05	9.60114e-06	2.76676e-05	2.79845e-06
20.8	0.0715129	0.0853257	0.0327214	0.0444771	0.0385514	0.0477014	0.04089	0.0393229		20.8	0.0693	0.0759	0.0504	0.0477	0.046	0.0554	0.0508	0.0298		0.0688	0.0756	0.0505	0.0463	0.044	0.0523	0.0484	0.0286		0.00221286	0.00942571	-0.0176786	-0.00322286	-0.00744857	-0.00769857	-0.00991	0.00952286		4.89674e-06	8.88441e-05	0.000312532	1.03868e-05	5.54812e-05	5.9268e-05	9.82081e-05	9.06848e-05
21	0.0716129	0.0829757	0.0332714	0.0414771	0.0390014	0.0596014	0.04209	0.0320729		21	0.0686	0.0754	0.0502	0.0476	0.046	0.0547	0.0501	0.0303		0.0682	0.075	0.0504	0.0463	0.044	0.0523	0.0491	0.0272		0.00301286	0.00757571	-0.0169286	-0.00612286	-0.00699857	0.00490143	-0.00801	0.00177286		9.07731e-06	5.73914e-05	0.000286577	3.74894e-05	4.898e-05	2.4024e-05	6.41601e-05	3.14302e-06
21.2	0.0729629	0.0794257	0.0340214	0.0444271	0.0385514	0.0672014	0.03899	0.0269229		21.2	0.068	0.0748	0.0501	0.0477	0.0454	0.0542	0.05	0.032		0.0677	0.0744	0.0504	0.0462	0.0439	0.052	0.0489	0.0272		0.00496286	0.00462571	-0.0160786	-0.00327286	-0.00684857	0.0130014	-0.01101	-0.00507714		2.463e-05	2.13972e-05	0.00025852	1.07116e-05	4.69029e-05	0.000169037	0.00012122	2.57774e-05
21.4	0.0713129	0.0802257	0.0331214	0.0406771	0.0443514	0.0627514	0.04089	0.0309729		21.4	0.0675	0.0742	0.0503	0.0476	0.0448	0.0541	0.0506	0.0306		0.0671	0.0739	0.0503	0.0461	0.0438	0.0518	0.0482	0.0276		0.00381286	0.00602571	-0.0171786	-0.00692286	-0.000448571	0.00865143	-0.00971	0.000372857		1.45379e-05	3.63092e-05	0.000295103	4.7926e-05	2.01216e-07	7.48472e-05	9.42841e-05	1.39022e-07
21.6	0.0684129	0.0817257	0.0334214	0.0419771	0.0421014	0.0570514	0.04204	0.0310729		21.6	0.0668	0.0737	0.0505	0.0471	0.0444	0.0538	0.0511	0.0291		0.0665	0.0734	0.0505	0.0461	0.0436	0.0518	0.048	0.0279		0.00161286	0.00802571	-0.0170786	-0.00512286	-0.00229857	0.00325143	-0.00906	0.00197286		2.60131e-06	6.44121e-05	0.000291678	2.62437e-05	5.28343e-06	1.05718e-05	8.20836e-05	3.89217e-06
21.8	0.0695629	0.0768757	0.0325714	0.0451271	0.0490014	0.0508514	0.04269	0.0332229		21.8	0.0662	0.0731	0.0506	0.0467	0.044	0.0537	0.0512	0.031		0.0659	0.0728	0.0505	0.046	0.0435	0.0518	0.0486	0.028		0.00336286	0.00377571	-0.0180286	-0.00157286	0.00500143	-0.00284857	-0.00851	0.00222286		1.13088e-05	1.4256e-05	0.000325029	2.47388e-06	2.50143e-05	8.11436e-06	7.24201e-05	4.94109e-06
22	0.0676129	0.0797257	0.0339214	0.0458771	0.0403014	0.0482014	0.04729	0.0272229		22	0.0656	0.0725	0.0501	0.0465	0.0441	0.0541	0.0514	0.031		0.0653	0.0723	0.0504	0.0458	0.0433	0.0517	0.0491	0.0284		0.00201286	0.00722571	-0.0161786	-0.000622857	-0.00379857	-0.00589857	-0.00411	-0.00377714		4.05159e-06	5.22109e-05	0.000261746	3.87951e-07	1.44291e-05	3.47931e-05	1.68921e-05	1.42668e-05
22.2	0.0674629	0.0791757	0.0333214	0.0386771	0.0429514	0.0576014	0.03539	0.0295229		22.2	0.065	0.072	0.0495	0.0464	0.0445	0.0544	0.0512	0.0293		0.0648	0.0718	0.0502	0.0456	0.0433	0.0516	0.0491	0.0276		0.00246286	0.00717571	-0.0161786	-0.00772286	-0.00154857	0.00320143	-0.01581	0.000222857		6.06567e-06	5.14909e-05	0.000261746	5.96425e-05	2.39807e-06	1.02491e-05	0.000249956	4.96653e-08
22.4	0.0694629	0.0724257	0.0335214	0.0419771	0.0439014	0.0628514	0.04369	0.0294229		22.4	0.0647	0.0718	0.0492	0.0462	0.045	0.054	0.0506	0.0312		0.0644	0.0714	0.0499	0.0454	0.0435	0.0513	0.0489	0.0275		0.00476286	0.000625714	-0.0156786	-0.00422286	-0.00109857	0.00885143	-0.00691	-0.00177714		2.26848e-05	3.91518e-07	0.000245818	1.78325e-05	1.20686e-06	7.83478e-05	4.77481e-05	3.15824e-06
22.6	0.0671629	0.0774757	0.0324714	0.0431771	0.0442514	0.0592014	0.03909	0.0309229		22.6	0.0646	0.0717	0.0491	0.0461	0.0454	0.0529	0.05	0.0306		0.0643	0.0712	0.0497	0.0454	0.0438	0.0511	0.0486	0.0276		0.00256286	0.00577571	-0.0166286	-0.00292286	-0.00114857	0.00630143	-0.01091	0.000322857		6.56824e-06	3.33589e-05	0.000276509	8.54309e-06	1.31922e-06	3.9708e-05	0.000119028	1.04237e-07
22.8	0.0672629	0.0781257	0.0328714	0.0446271	0.0445514	0.0584514	0.04419	0.0331729		22.8	0.0646	0.0717	0.0491	0.0462	0.045	0.0521	0.0496	0.0282		0.0643	0.0712	0.0495	0.0455	0.0439	0.0508	0.0484	0.0271		0.00266286	0.00642571	-0.0162286	-0.00157286	-0.000448571	0.00635143	-0.00541	0.00497286		7.09081e-06	4.12898e-05	0.000263367	2.47388e-06	2.01216e-07	4.03406e-05	2.92681e-05	2.47293e-05
23	0.0655629	0.0781257	0.0340714	0.0447271	0.0370014	0.0583514	0.04289	0.0337729		23	0.0647	0.0717	0.049	0.0463	0.0442	0.052	0.0493	0.0305		0.0644	0.0712	0.0494	0.0456	0.0437	0.0505	0.0484	0.0265		0.000862857	0.00642571	-0.0149286	-0.00157286	-0.00719857	0.00635143	-0.00641	0.00327286		7.44522e-07	4.12898e-05	0.000222862	2.47388e-06	5.18194e-05	4.03406e-05	4.10881e-05	1.07116e-05
23.2	0.0646629	0.0752757	0.0359214	0.0389271	0.0446514	0.0561514	0.04054	0.0293729		23.2	0.0647	0.0717	0.0492	0.0462	0.0434	0.0525	0.0496	0.032		0.0644	0.0713	0.0494	0.0457	0.0434	0.0505	0.0483	0.027		-3.71429e-05	0.00357571	-0.0132786	-0.00727286	0.00125143	0.00365143	-0.00906	-0.00262714		1.37959e-09	1.27857e-05	0.00017632	5.28945e-05	1.56607e-06	1.33329e-05	8.20836e-05	6.90188e-06
23.4	0.0646129	0.0781257	0.0345214	0.0415771	0.0432014	0.0590514	0.04449	0.0292729		23.4	0.0647	0.0716	0.0494	0.046	0.0431	0.0529	0.05	0.0317		0.0643	0.0712	0.0495	0.0458	0.0432	0.0507	0.0482	0.0274		-8.71429e-05	0.00652571	-0.0148786	-0.00442286	0.000101429	0.00615143	-0.00551	-0.00242714		7.59388e-09	4.25849e-05	0.000221372	1.95617e-05	1.02878e-08	3.78401e-05	3.03601e-05	5.89102e-06
23.6	0.0654129	0.0779257	0.0331214	0.0415771	0.0434514	0.0621514	0.04084	0.0309229		23.6	0.0644	0.0714	0.0492	0.0461	0.0432	0.0529	0.0501	0.0321		0.0641	0.071	0.0496	0.0459	0.0431	0.0509	0.0481	0.0287		0.00101286	0.00652571	-0.0160786	-0.00452286	0.000251429	0.00925143	-0.00926	-0.00117714		1.02588e-06	4.25849e-05	0.00025852	2.04562e-05	6.32163e-08	8.55889e-05	8.57476e-05	1.38567e-06
23.8	0.0679129	0.0737757	0.0321214	0.0401771	0.0471514	0.0580014	0.04099	0.0324229		23.8	0.0641	0.0712	0.0485	0.0464	0.0436	0.0528	0.0502	0.0352		0.0637	0.0708	0.0495	0.0459	0.0432	0.0511	0.0481	0.0291		0.00381286	0.00257571	-0.0163786	-0.00622286	0.00355143	0.00520143	-0.00921	-0.00277714		1.45379e-05	6.6343e-06	0.000268258	3.8724e-05	1.26126e-05	2.70549e-05	8.48241e-05	7.71252e-06
24	0.0666129	0.0800757	0.0347214	0.0446271	0.0418514	0.0561514	0.03974	0.0304729		24	0.0636	0.0709	0.0481	0.0465	0.0439	0.0527	0.0497	0.0297		0.0633	0.0707	0.0493	0.0459	0.0432	0.0509	0.0481	0.03		0.00301286	0.00917571	-0.0133786	-0.00187286	-0.00204857	0.00345143	-0.00996	0.000772857		9.07731e-06	8.41937e-05	0.000178986	3.50759e-06	4.19664e-06	1.19124e-05	9.92016e-05	5.97308e-07
24.2	0.0636129	0.0773757	0.0356214	0.0393271	0.0461014	0.0508514	0.04334	0.0334729		24.2	0.0632	0.0705	0.0482	0.0462	0.0441	0.0524	0.0492	0.0298		0.063	0.0703	0.049	0.0457	0.0432	0.0506	0.0482	0.0291		0.000412857	0.00687571	-0.0125786	-0.00687286	0.00200143	-0.00154857	-0.00586	0.00367286		1.70451e-07	4.72754e-05	0.00015822	4.72362e-05	4.00572e-06	2.39807e-06	3.43396e-05	1.34899e-05
24.4	0.0651129	0.0710757	0.0347214	0.0445771	0.0441514	0.0508514	0.04074	0.0311729		24.4	0.0628	0.0699	0.0481	0.0462	0.044	0.0518	0.0488	0.0312		0.0626	0.0698	0.0487	0.0456	0.0432	0.0503	0.0481	0.0271		0.00231286	0.00117571	-0.0133786	-0.00162286	0.000151429	-0.000948571	-0.00806	-2.71429e-05		5.34931e-06	1.3823e-06	0.000178986	2.63367e-06	2.29306e-08	8.99788e-07	6.49636e-05	7.36735e-10
24.6	0.0654629	0.0728757	0.0327714	0.0460771	0.0409514	0.0535014	0.03824	0.0324229		24.6	0.0623	0.0693	0.0479	0.0461	0.0436	0.0515	0.0486	0.0327		0.0623	0.0692	0.0484	0.0455	0.0431	0.0501	0.0479	0.0285		0.00316286	0.00357571	-0.0151286	-2.28571e-05	-0.00264857	0.00200143	-0.01036	-0.000277143		1.00037e-05	1.27857e-05	0.000228874	5.22449e-10	7.01493e-06	4.00572e-06	0.00010733	7.68082e-08
24.8	0.0642629	0.0756257	0.0310214	0.0397771	0.0429514	0.0519514	0.04409	0.0311729		24.8	0.0619	0.0686	0.0477	0.0457	0.0431	0.0514	0.0486	0.031		0.0619	0.0685	0.0483	0.0454	0.0429	0.0499	0.0479	0.0291		0.00236286	0.00702571	-0.0166786	-0.00592286	-0.000148571	0.000551429	-0.00451	0.000172857		5.58309e-06	4.93607e-05	0.000278175	3.50802e-05	2.20735e-08	3.04073e-07	2.03401e-05	2.98796e-08
25	0.0636129	0.0735757	0.0325714	0.0404771	0.0453514	0.0563014	0.03829	0.0292229		25	0.0614	0.0679	0.0475	0.0451	0.0423	0.0516	0.0489	0.0302		0.0614	0.0678	0.0481	0.0452	0.0426	0.0497	0.0477	0.0285		0.00221286	0.00567571	-0.0149286	-0.00462286	0.00305143	0.00470143	-0.01061	-0.000977143		4.89674e-06	3.22137e-05	0.000222862	2.13708e-05	9.31122e-06	2.21034e-05	0.000112572	9.54808e-07
25.2	0.0642129	0.0756757	0.0319714	0.0398271	0.0436014	0.0559014	0.04454	0.0292229		25.2	0.0609	0.0674	0.0473	0.0446	0.0418	0.0516	0.049	0.0307		0.0609	0.0672	0.0479	0.0448	0.0422	0.0495	0.0473	0.0306		0.00331286	0.00827571	-0.0153286	-0.00477286	0.00180143	0.00430143	-0.00446	-0.00147714		1.0975e-05	6.84874e-05	0.000234965	2.27802e-05	3.24514e-06	1.85023e-05	1.98916e-05	2.18195e-06
25.4	0.0632129	0.0740757	0.0302214	0.0416771	0.0412014	0.0532014	0.04024	0.0273229		25.4	0.0606	0.0672	0.0469	0.0444	0.0417	0.0511	0.0488	0.0302		0.0605	0.0669	0.0477	0.0445	0.0418	0.0494	0.0471	0.025		0.00261286	0.00687571	-0.0166786	-0.00272286	-0.000498571	0.00210143	-0.00856	-0.00287714		6.82702e-06	4.72754e-05	0.000278175	7.41395e-06	2.48573e-07	4.416e-06	7.32736e-05	8.27795e-06
25.6	0.0628629	0.0725757	0.0298714	0.0416771	0.0409014	0.0534014	0.04054	0.0315229		25.6	0.0604	0.0672	0.0466	0.0442	0.042	0.0504	0.0482	0.0291		0.0604	0.0669	0.0476	0.0441	0.0415	0.0493	0.0472	0.0271		0.00246286	0.00537571	-0.0167286	-0.00252286	-0.00109857	0.00300143	-0.00766	0.00242286		6.06567e-06	2.88983e-05	0.000279845	6.36481e-06	1.20686e-06	9.00857e-06	5.86756e-05	5.87024e-06
25.8	0.0611129	0.0744757	0.0313714	0.0408771	0.0401014	0.0490514	0.03764	0.0314229		25.8	0.0604	0.0673	0.0464	0.0441	0.0421	0.05	0.0472	0.0318		0.0603	0.067	0.0476	0.044	0.0414	0.049	0.0471	0.0292		0.000712857	0.00717571	-0.0150286	-0.00322286	-0.00199857	-0.000948571	-0.00956	-0.000377143		5.08165e-07	5.14909e-05	0.000225858	1.03868e-05	3.99429e-06	8.99788e-07	9.13936e-05	1.42237e-07
26	0.0614129	0.0751757	0.0316214	0.0398271	0.0419514	0.0575514	0.03909	0.0319229		26	0.0603	0.0674	0.0465	0.0441	0.0419	0.0499	0.0465	0.0329		0.0602	0.0671	0.0474	0.0439	0.0413	0.0487	0.0467	0.0283		0.00111286	0.00777571	-0.0148786	-0.00427286	5.14286e-05	0.00765143	-0.00741	-0.000977143		1.23845e-06	6.04617e-05	0.000221372	1.82573e-05	2.6449e-09	5.85444e-05	5.49081e-05	9.54808e-07
26.2	0.0632129	0.0705257	0.0320714	0.0419271	0.0421514	0.0545514	0.04249	0.0311729		26.2	0.0603	0.0674	0.0467	0.0442	0.0413	0.05	0.0467	0.0253		0.0601	0.0671	0.0474	0.044	0.0413	0.0486	0.0461	0.0285		0.00291286	0.00312571	-0.0146286	-0.00227286	0.000851429	0.00455143	-0.00421	0.00587286		8.48474e-06	9.77009e-06	0.000213995	5.16588e-06	7.24931e-07	2.07155e-05	1.77241e-05	3.44905e-05
26.4	0.0605129	0.0754257	0.0312714	0.0358771	0.0402514	0.0543014	0.04219	0.0290729		26.4	0.0601	0.0673	0.0467	0.0444	0.0409	0.05	0.0472	0.0263		0.0599	0.067	0.0473	0.0442	0.0413	0.0486	0.0459	0.0299		0.000412857	0.00812571	-0.0154286	-0.00852286	-0.000648571	0.00430143	-0.00501	0.00277286		1.70451e-07	6.60272e-05	0.000238041	7.26391e-05	4.20645e-07	1.85023e-05	2.51001e-05	7.68874e-06
26.6	0.0620629	0.0708757	0.0332214	0.0439771	0.0415514	0.0517014	0.03919	0.0292729		26.6	0.0598	0.0671	0.0465	0.0443	0.0407	0.0499	0.0474	0.0299		0.0596	0.0668	0.0473	0.0442	0.0412	0.0486	0.0461	0.0267		0.00226286	0.00377571	-0.0132786	-0.000322857	0.000851429	0.00180143	-0.00821	-0.000627143		5.12052e-06	1.4256e-05	0.00017632	1.04237e-07	7.24931e-07	3.24514e-06	6.74041e-05	3.93308e-07
26.8	0.0609129	0.0735757	0.0315714	0.0363771	0.0350514	0.0474014	0.04124	0.0303729		26.8	0.0594	0.0668	0.0461	0.0441	0.0409	0.0498	0.0473	0.0318		0.0593	0.0666	0.0472	0.0442	0.0411	0.0485	0.0464	0.025		0.00151286	0.00677571	-0.0145286	-0.00772286	-0.00584857	-0.00239857	-0.00606	-0.00142714		2.28874e-06	4.59103e-05	0.000211079	5.96425e-05	3.42058e-05	5.75314e-06	3.67236e-05	2.03674e-06
27	0.0639629	0.0754757	0.0303214	0.0417771	0.0377514	0.0448014	0.03719	0.0294729		27	0.0591	0.0665	0.0459	0.0438	0.0411	0.0497	0.0473	0.0291		0.059	0.0662	0.0469	0.044	0.041	0.0483	0.0464	0.0283		0.00486286	0.00897571	-0.0155786	-0.00202286	-0.00334857	-0.00489857	-0.01011	0.000372857		2.36474e-05	8.05634e-05	0.000242692	4.09195e-06	1.12129e-05	2.3996e-05	0.000102212	1.39022e-07
27.2	0.0626129	0.0712257	0.0323714	0.0373271	0.0407514	0.0516014	0.04004	0.0299729		27.2	0.0588	0.0661	0.0457	0.0436	0.0412	0.0496	0.0472	0.031		0.0587	0.0659	0.0466	0.0438	0.0409	0.0481	0.0462	0.0305		0.00381286	0.00512571	-0.0133286	-0.00627286	-0.000448571	0.00200143	-0.00716	-0.00102714		1.45379e-05	2.62729e-05	0.000177651	3.93487e-05	2.01216e-07	4.00572e-06	5.12656e-05	1.05502e-06
27.4	0.0604129	0.0714757	0.0324214	0.0384271	0.0421014	0.0539514	0.03974	0.0280729		27.4	0.0586	0.0659	0.0455	0.0434	0.0411	0.0493	0.0468	0.028		0.0585	0.0656	0.0464	0.0436	0.0408	0.0479	0.046	0.0291		0.00181286	0.00557571	-0.0130786	-0.00497286	0.00100143	0.00465143	-0.00706	7.28571e-05		3.28645e-06	3.10886e-05	0.000171049	2.47293e-05	1.00286e-06	2.16358e-05	4.98436e-05	5.30816e-09
27.6	0.0609629	0.0726257	0.0321714	0.0400771	0.0375514	0.0540514	0.04009	0.0302729		27.6	0.0584	0.0656	0.0453	0.0433	0.0408	0.0491	0.0463	0.0255		0.0583	0.0653	0.0462	0.0433	0.0406	0.0478	0.0458	0.0288		0.00256286	0.00702571	-0.0131286	-0.00322286	-0.00324857	0.00495143	-0.00621	0.00477286		6.56824e-06	4.93607e-05	0.000172359	1.03868e-05	1.05532e-05	2.45166e-05	3.85641e-05	2.27802e-05
27.8	0.0597629	0.0708257	0.0317214	0.0372271	0.0387014	0.0531514	0.03669	0.0306229		27.8	0.0583	0.0653	0.0452	0.0433	0.0404	0.0491	0.0462	0.0282		0.0582	0.0651	0.0461	0.0431	0.0404	0.0478	0.0459	0.0275		0.00146286	0.00552571	-0.0134786	-0.00607286	-0.00169857	0.00405143	-0.00951	0.00242286		2.13995e-06	3.05335e-05	0.000181672	3.68796e-05	2.88514e-06	1.64141e-05	9.04401e-05	5.87024e-06
28	0.0629129	0.0700757	0.0331714	0.0417771	0.0429014	0.0489514	0.04029	0.0312229		28	0.0581	0.065	0.0452	0.0432	0.0401	0.049	0.0464	0.0316		0.058	0.0648	0.046	0.0429	0.0402	0.0477	0.046	0.026		0.00481286	0.00507571	-0.0120286	-0.00142286	0.00280143	-4.85714e-05	-0.00611	-0.000377143		2.31636e-05	2.57629e-05	0.000144687	2.02452e-06	7.848e-06	2.35918e-09	3.73321e-05	1.42237e-07
28.2	0.0614629	0.0714257	0.0322214	0.0338771	0.0407014	0.0492514	0.03989	0.0318729		28.2	0.058	0.0647	0.0452	0.0429	0.0399	0.0489	0.0466	0.0336		0.0579	0.0646	0.0459	0.0429	0.0402	0.0476	0.046	0.0268		0.00346286	0.00672571	-0.0129786	-0.00902286	0.000801429	0.000351429	-0.00671	-0.00172714		1.19914e-05	4.52352e-05	0.000168443	8.1412e-05	6.42288e-07	1.23502e-07	4.50241e-05	2.98302e-06
28.4	0.0611629	0.0710757	0.0364214	0.0435771	0.0383014	0.0487014	0.04219	0.0296729		28.4	0.058	0.0645	0.0451	0.0425	0.04	0.0485	0.0465	0.0283		0.0579	0.0644	0.0459	0.0428	0.0402	0.0474	0.0457	0.0292		0.00316286	0.00657571	-0.00867857	0.00107714	-0.00169857	0.000201429	-0.00431	0.00137286		1.00037e-05	4.324e-05	7.53176e-05	1.16024e-06	2.88514e-06	4.05735e-08	1.85761e-05	1.88474e-06
28.6	0.0607129	0.0704757	0.0343714	0.0315271	0.0393514	0.0516514	0.03899	0.0297729		28.6	0.0579	0.0644	0.0448	0.0424	0.0402	0.0483	0.0463	0.0266		0.0579	0.0643	0.0458	0.0427	0.0402	0.0473	0.0453	0.0277		0.00281286	0.00607571	-0.0104286	-0.0108729	-0.000848571	0.00335143	-0.00731	0.00317286		7.91217e-06	3.69143e-05	0.000108755	0.000118219	7.20073e-07	1.12321e-05	5.34361e-05	1.0067e-05
28.8	0.0593129	0.0706757	0.0307714	0.0434771	0.0387014	0.0510014	0.04104	0.0292729		28.8	0.0579	0.0643	0.0446	0.0424	0.0403	0.0482	0.046	0.0299		0.0579	0.0642	0.0458	0.0425	0.04	0.0473	0.0451	0.0261		0.00141286	0.00637571	-0.0138286	0.00107714	-0.00159857	0.00280143	-0.00496	-0.000627143		1.99617e-06	4.06497e-05	0.000191229	1.16024e-06	2.55543e-06	7.848e-06	2.46016e-05	3.93308e-07
29	0.0591129	0.0724757	0.0317714	0.0375271	0.0376014	0.0503014	0.03529	0.0294229		29	0.0577	0.0642	0.0446	0.0425	0.0401	0.0484	0.0456	0.0302		0.0576	0.064	0.0457	0.0425	0.0399	0.0472	0.045	0.0248		0.00141286	0.00827571	-0.0128286	-0.00497286	-0.00249857	0.00190143	-0.01031	-0.000777143		1.99617e-06	6.84874e-05	0.000164572	2.47293e-05	6.24286e-06	3.61543e-06	0.000106296	6.03951e-07
29.2	0.0621629	0.0716257	0.0332214	0.0350771	0.0403514	0.0527014	0.03949	0.0290229		29.2	0.0574	0.064	0.0447	0.0424	0.0397	0.0484	0.0454	0.0306		0.0574	0.0639	0.0457	0.0426	0.0397	0.0471	0.0452	0.0261		0.00476286	0.00762571	-0.0114786	-0.00732286	0.000651429	0.00430143	-0.00591	-0.00157714		2.26848e-05	5.81515e-05	0.000131758	5.36242e-05	4.24359e-07	1.85023e-05	3.49281e-05	2.48738e-06
29.4	0.0580629	0.0710757	0.0317214	0.0425771	0.0404014	0.0519014	0.03889	0.0273729		29.4	0.0569	0.0637	0.0446	0.0424	0.0394	0.0482	0.0454	0.0318		0.057	0.0636	0.0455	0.0426	0.0396	0.047	0.0452	0.0277		0.00116286	0.00737571	-0.0128786	0.000177143	0.00100143	0.00370143	-0.00651	-0.00442714		1.35224e-06	5.44012e-05	0.000165858	3.13796e-08	1.00286e-06	1.37006e-05	4.23801e-05	1.95996e-05
29.6	0.0579629	0.0700757	0.0326214	0.0320771	0.0382514	0.0496514	0.04199	0.0277729		29.6	0.0564	0.0635	0.0443	0.0424	0.0393	0.0479	0.0454	0.0294		0.0565	0.0633	0.0453	0.0425	0.0396	0.0469	0.045	0.0262		0.00156286	0.00657571	-0.0116786	-0.0103229	-0.00104857	0.00175143	-0.00341	-0.00162714		2.44252e-06	4.324e-05	0.000136389	0.000106561	1.0995e-06	3.0675e-06	1.16281e-05	2.64759e-06
29.8	0.0577129	0.0704757	0.0350714	0.0423771	0.0397014	0.0461514	0.03354	0.0290729		29.8	0.0559	0.0632	0.0441	0.0424	0.0392	0.0477	0.0454	0.0275		0.056	0.063	0.0451	0.0424	0.0396	0.0467	0.0447	0.0273		0.00181286	0.00727571	-0.00902857	-2.28571e-05	0.000501429	-0.00154857	-0.01186	0.00157286		3.28645e-06	5.2936e-05	8.15151e-05	5.22449e-10	2.51431e-07	2.39807e-06	0.00014066	2.47388e-06
30	0.0571629	0.0693757	0.0327214	0.0320771	0.0371514	0.0449014	0.04099	0.0290729		30	0.0555	0.0628	0.044	0.0421	0.0392	0.0475	0.0454	0.0291		0.0556	0.0627	0.0449	0.0422	0.0395	0.0466	0.0445	0.0252		0.00166286	0.00657571	-0.0112786	-0.0100229	-0.00204857	-0.00259857	-0.00441	-2.71429e-05		2.76509e-06	4.324e-05	0.000127206	0.000100458	4.19664e-06	6.75257e-06	1.94481e-05	7.36735e-10
30.2	0.0598129	0.0696757	0.0351214	0.0404771	0.0381514	0.0475014	0.03434	0.0280729		30.2	0.0552	0.0625	0.0438	0.0417	0.0391	0.0473	0.0453	0.0307		0.0553	0.0624	0.0447	0.042	0.0393	0.0463	0.0443	0.0248		0.00461286	0.00717571	-0.00867857	-0.00122286	-0.000948571	0.000201429	-0.01096	-0.00262714		2.12785e-05	5.14909e-05	7.53176e-05	1.49538e-06	8.99788e-07	4.05735e-08	0.000120122	6.90188e-06
30.4	0.0567129	0.0687257	0.0326214	0.0360771	0.0418014	0.0541514	0.03619	0.0295229		30.4	0.0551	0.0623	0.0435	0.0413	0.0389	0.047	0.045	0.0263		0.0551	0.0622	0.0445	0.0417	0.039	0.046	0.0443	0.0275		0.00161286	0.00642571	-0.0108786	-0.00522286	0.00290143	0.00715143	-0.00881	0.00322286		2.60131e-06	4.12898e-05	0.000118343	2.72782e-05	8.41829e-06	5.11429e-05	7.76161e-05	1.03868e-05
30.6	0.0592129	0.0690257	0.0331214	0.0354771	0.0393014	0.0527514	0.04159	0.0281229		30.6	0.055	0.0619	0.0432	0.0411	0.0387	0.0469	0.0447	0.0256		0.055	0.0618	0.0443	0.0414	0.0386	0.0458	0.0443	0.0279		0.00421286	0.00712571	-0.0100786	-0.00562286	0.000601429	0.00585143	-0.00311	0.00252286		1.77482e-05	5.07758e-05	0.000101578	3.16165e-05	3.61716e-07	3.42392e-05	9.6721e-06	6.36481e-06
30.8	0.0593129	0.0662757	0.0345714	0.0416271	0.0366014	0.0485514	0.03674	0.0282229		30.8	0.055	0.0614	0.0429	0.0411	0.0385	0.0468	0.0445	0.0277		0.055	0.0613	0.0441	0.0412	0.0384	0.0456	0.0441	0.0244		0.00431286	0.00487571	-0.00832857	0.000527143	-0.00189857	0.00175143	-0.00776	0.000522857		1.86007e-05	2.37726e-05	6.93651e-05	2.7788e-07	3.60457e-06	3.0675e-06	6.02176e-05	2.7338e-07
31	0.0576629	0.0686757	0.0361714	0.0308271	0.0368514	0.0508514	0.04254	0.0309729		31	0.0548	0.0609	0.0428	0.0411	0.0382	0.0468	0.0444	0.0291		0.0548	0.0608	0.0439	0.041	0.0382	0.0456	0.0438	0.0256		0.00286286	0.00777571	-0.00662857	-0.0102729	-0.00134857	0.00405143	-0.00186	0.00187286		8.19595e-06	6.04617e-05	4.3938e-05	0.000105532	1.81864e-06	1.64141e-05	3.4596e-06	3.50759e-06
31.2	0.0590129	0.0677757	0.0331714	0.0380771	0.0413014	0.0503014	0.03159	0.0307729		31.2	0.0544	0.0604	0.0428	0.041	0.0379	0.0466	0.0443	0.0279		0.0544	0.0603	0.0437	0.0408	0.0382	0.0456	0.0437	0.0232		0.00461286	0.00737571	-0.00962857	-0.00292286	0.00340143	0.00370143	-0.01271	0.00287286		2.12785e-05	5.44012e-05	9.27094e-05	8.54309e-06	1.15697e-05	1.37006e-05	0.000161544	8.25331e-06
31.4	0.0560129	0.0664757	0.0342214	0.0324271	0.0361014	0.0516514	0.03934	0.0298229		31.4	0.0541	0.06	0.0427	0.0407	0.0378	0.0463	0.0442	0.0307		0.0541	0.06	0.0436	0.0408	0.0383	0.0454	0.0437	0.0235		0.00191286	0.00647571	-0.00847857	-0.00827286	-0.00169857	0.00535143	-0.00486	-0.000877143		3.65902e-06	4.19349e-05	7.18862e-05	6.84402e-05	2.88514e-06	2.86378e-05	2.36196e-05	7.6938e-07
31.6	0.0582129	0.0661257	0.0313214	0.0349271	0.0338514	0.0475014	0.03374	0.0302229		31.6	0.0538	0.0597	0.0425	0.0403	0.0378	0.046	0.044	0.0306		0.0538	0.0596	0.0435	0.0407	0.0382	0.0451	0.0438	0.0259		0.00441286	0.00642571	-0.0111786	-0.00537286	-0.00394857	0.00150143	-0.01026	-0.000377143		1.94733e-05	4.12898e-05	0.00012496	2.88676e-05	1.55912e-05	2.25429e-06	0.000105268	1.42237e-07
31.8	0.0578129	0.0642257	0.0323714	0.0377271	0.0379514	0.0492514	0.03904	0.0291229		31.8	0.0535	0.0594	0.0423	0.04	0.0379	0.0458	0.044	0.0268		0.0535	0.0593	0.0434	0.0405	0.038	0.0449	0.0437	0.0264		0.00431286	0.00482571	-0.00992857	-0.00227286	5.14286e-05	0.00345143	-0.00496	0.00232286		1.86007e-05	2.32875e-05	9.85765e-05	5.16588e-06	2.6449e-09	1.19124e-05	2.46016e-05	5.39567e-06
32	0.0564129	0.0685757	0.0314214	0.0340771	0.0396514	0.0489514	0.04124	0.0273229		32	0.0532	0.0592	0.0422	0.0399	0.0379	0.0456	0.0441	0.025		0.0532	0.0591	0.0432	0.0403	0.0377	0.0448	0.0434	0.0281		0.00321286	0.00937571	-0.0107786	-0.00582286	0.00175143	0.00335143	-0.00286	0.00232286		1.03225e-05	8.7904e-05	0.000116178	3.39057e-05	3.0675e-06	1.12321e-05	8.1796e-06	5.39567e-06
32.2	0.0583129	0.0657757	0.0309714	0.0382771	0.0406014	0.0488014	0.03684	0.0290229		32.2	0.0529	0.0591	0.0422	0.0398	0.0377	0.0456	0.044	0.0291		0.0529	0.059	0.0432	0.0401	0.0375	0.0448	0.043	0.029		0.00541286	0.00667571	-0.0112286	-0.00152286	0.00290143	0.00320143	-0.00716	-7.71429e-05		2.9299e-05	4.45652e-05	0.000126081	2.31909e-06	8.41829e-06	1.02491e-05	5.12656e-05	5.95102e-09
32.4	0.0569129	0.0650257	0.0313214	0.0288771	0.0325014	0.0511514	0.03354	0.0290729		32.4	0.0525	0.059	0.042	0.0397	0.0373	0.0457	0.0437	0.0287		0.0525	0.0589	0.0431	0.04	0.0374	0.0447	0.0427	0.0275		0.00441286	0.00602571	-0.0106786	-0.0108229	-0.00479857	0.00545143	-0.01016	0.000372857		1.94733e-05	3.63092e-05	0.000114032	0.000117134	2.30263e-05	2.97181e-05	0.000103226	1.39022e-07
32.6	0.0577629	0.0662757	0.0319714	0.0420771	0.0365014	0.0501514	0.03384	0.0298229		32.6	0.0522	0.0589	0.0417	0.0396	0.0369	0.0457	0.0433	0.0247		0.0522	0.0588	0.0429	0.04	0.0374	0.0445	0.0427	0.0257		0.00556286	0.00737571	-0.00972857	0.00247714	-0.000398571	0.00445143	-0.00946	0.00512286		3.09454e-05	5.44012e-05	9.46451e-05	6.13624e-06	1.58859e-07	1.98152e-05	8.94916e-05	2.62437e-05
32.8	0.0579629	0.0627257	0.0307714	0.0329271	0.0370514	0.0502014	0.03784	0.0305729		32.8	0.0518	0.0587	0.0415	0.0396	0.0368	0.0456	0.043	0.0255		0.0518	0.0586	0.0426	0.04	0.0373	0.0443	0.0428	0.0261		0.00616286	0.00402571	-0.0107286	-0.00667286	0.000251429	0.00460143	-0.00516	0.00507286		3.79808e-05	1.62064e-05	0.000115102	4.4527e-05	6.32163e-08	2.11731e-05	2.66256e-05	2.57339e-05
33	0.0557629	0.0639757	0.0307214	0.0375771	0.0367014	0.0492514	0.03799	0.0289729		33	0.0516	0.0584	0.0413	0.0397	0.0369	0.0452	0.043	0.0226		0.0516	0.0583	0.0423	0.0398	0.0372	0.0441	0.0427	0.0282		0.00416286	0.00557571	-0.0105786	-0.00212286	-0.000198571	0.00405143	-0.00501	0.00637286		1.73294e-05	3.10886e-05	0.000111906	4.50652e-06	3.94306e-08	1.64141e-05	2.51001e-05	4.06133e-05
33.2	0.0551629	0.0667257	0.0331214	0.0367771	0.0373014	0.0486514	0.03639	0.0289729		33.2	0.0515	0.0581	0.0412	0.0396	0.037	0.0448	0.043	0.0235		0.0515	0.058	0.0421	0.0396	0.037	0.044	0.0425	0.0264		0.00366286	0.00862571	-0.00807857	-0.00282286	0.000301429	0.00385143	-0.00661	0.00547286		1.34165e-05	7.44029e-05	6.52633e-05	7.96852e-06	9.08592e-08	1.48335e-05	4.36921e-05	2.99522e-05
33.4	0.0537129	0.0656257	0.0329714	0.0352771	0.0337014	0.0525014	0.03834	0.0287729		33.4	0.0514	0.0578	0.041	0.0392	0.0368	0.0445	0.0428	0.0259		0.0514	0.0577	0.0419	0.0394	0.0368	0.0438	0.0421	0.0256		0.00231286	0.00782571	-0.00802857	-0.00392286	-0.00309857	0.00800143	-0.00446	0.00287286		5.34931e-06	6.12418e-05	6.4458e-05	1.53888e-05	9.60114e-06	6.40229e-05	1.98916e-05	8.25331e-06
33.6	0.0567129	0.0643757	0.0333214	0.0377271	0.0359014	0.0474014	0.03364	0.0300729		33.6	0.0513	0.0575	0.0407	0.0388	0.0365	0.0444	0.0424	0.0261		0.0513	0.0574	0.0418	0.0391	0.0365	0.0436	0.0418	0.0273		0.00541286	0.00687571	-0.00737857	-0.00107286	-0.000598571	0.00300143	-0.00876	0.00397286		2.9299e-05	4.72754e-05	5.44433e-05	1.15102e-06	3.58288e-07	9.00857e-06	7.67376e-05	1.57836e-05
33.8	0.0554629	0.0629257	0.0298214	0.0332771	0.0369014	0.0482014	0.03604	0.0310229		33.8	0.0512	0.0572	0.0404	0.0384	0.0361	0.0443	0.042	0.0283		0.0512	0.0572	0.0416	0.0389	0.0363	0.0434	0.0416	0.0278		0.00426286	0.00572571	-0.0105786	-0.00512286	0.000801429	0.00390143	-0.00596	0.00272286		1.8172e-05	3.27838e-05	0.000111906	2.62437e-05	6.42288e-07	1.52211e-05	3.55216e-05	7.41395e-06
34	0.0541629	0.0652757	0.0299714	0.0355771	0.0382514	0.0497514	0.03684	0.0307729		34	0.051	0.057	0.0403	0.0384	0.0358	0.0442	0.0419	0.0247		0.0511	0.0569	0.0415	0.0388	0.0361	0.0433	0.0415	0.0253		0.00316286	0.00827571	-0.0103286	-0.00282286	0.00245143	0.00555143	-0.00506	0.00607286		1.00037e-05	6.84874e-05	0.000106679	7.96852e-06	6.0095e-06	3.08184e-05	2.56036e-05	3.68796e-05
34.2	0.0551629	0.0636257	0.0301714	0.0309271	0.0388514	0.0450014	0.03794	0.0307229		34.2	0.0508	0.0567	0.0403	0.0385	0.0356	0.0439	0.042	0.0248		0.0508	0.0567	0.0414	0.0386	0.0359	0.0431	0.0415	0.0248		0.00436286	0.00692571	-0.0101286	-0.00757286	0.00325143	0.00110143	-0.00406	0.00592286		1.90345e-05	4.79655e-05	0.000102588	5.73482e-05	1.05718e-05	1.21314e-06	1.64836e-05	3.50802e-05
34.4	0.0548629	0.0655757	0.0303714	0.0374271	0.0374014	0.0445014	0.03374	0.0291229		34.4	0.0505	0.0566	0.0404	0.0384	0.0355	0.0436	0.0421	0.0259		0.0506	0.0565	0.0413	0.0384	0.0357	0.0429	0.0415	0.0264		0.00436286	0.00897571	-0.0100286	-0.000972857	0.00190143	0.000901429	-0.00836	0.00322286		1.90345e-05	8.05634e-05	0.000100572	9.46451e-07	3.61543e-06	8.12573e-07	6.98896e-05	1.03868e-05
34.6	0.0550129	0.0631757	0.0311214	0.0326271	0.0372514	0.0447514	0.03194	0.0299729		34.6	0.0503	0.0566	0.0402	0.0382	0.0353	0.0435	0.0419	0.027		0.0504	0.0564	0.0413	0.0383	0.0357	0.0427	0.0415	0.0252		0.00471286	0.00657571	-0.00907857	-0.00557286	0.00195143	0.00125143	-0.00996	0.00297286		2.2211e-05	4.324e-05	8.24205e-05	3.10567e-05	3.80807e-06	1.56607e-06	9.92016e-05	8.83788e-06
34.8	0.0531629	0.0652257	0.0308714	0.0383271	0.0377014	0.0539514	0.03489	0.0282729		34.8	0.0502	0.0566	0.0401	0.0379	0.0352	0.0435	0.0416	0.0236		0.0503	0.0565	0.0412	0.0382	0.0357	0.0426	0.0414	0.0245		0.00296286	0.00862571	-0.00922857	0.000427143	0.00250143	0.0104514	-0.00671	0.00467286		8.77852e-06	7.44029e-05	8.51665e-05	1.82451e-07	6.25714e-06	0.000109232	4.50241e-05	2.18356e-05
35	0.0545629	0.0678257	0.0329714	0.0346771	0.0368514	0.0467514	0.03669	0.0280729		35	0.0503	0.0567	0.04	0.0376	0.0352	0.0434	0.0412	0.0257		0.0503	0.0566	0.0411	0.038	0.0357	0.0424	0.0412	0.0263		0.00426286	0.0111257	-0.00702857	-0.00292286	0.00165143	0.00335143	-0.00451	0.00237286		1.8172e-05	0.000123782	4.94008e-05	8.54309e-06	2.72722e-06	1.12321e-05	2.03401e-05	5.63045e-06
35.2	0.0557629	0.0626757	0.0309214	0.0354271	0.0386014	0.0455014	0.03559	0.0256229		35.2	0.0503	0.0569	0.04	0.0375	0.0352	0.0432	0.041	0.0251		0.0503	0.0568	0.041	0.0379	0.0356	0.0424	0.0409	0.0266		0.00546286	0.00577571	-0.00907857	-0.00207286	0.00340143	0.00230143	-0.00541	0.000522857		2.98428e-05	3.33589e-05	8.24205e-05	4.29674e-06	1.15697e-05	5.29657e-06	2.92681e-05	2.7338e-07
35.4	0.0536629	0.0619257	0.0350214	0.0398771	0.0375514	0.0432014	0.03454	0.0277229		35.4	0.0503	0.0569	0.04	0.0375	0.0353	0.0431	0.0412	0.0222		0.0503	0.0568	0.0409	0.0379	0.0354	0.0425	0.0406	0.0254		0.00336286	0.00502571	-0.00497857	0.00237714	0.00225143	0.000101429	-0.00666	0.00552286		1.13088e-05	2.52578e-05	2.47862e-05	5.65081e-06	5.06893e-06	1.02878e-08	4.43556e-05	3.0502e-05
35.6	0.0517629	0.0679257	0.0303214	0.0339271	0.0410514	0.0460514	0.03469	0.0288729		35.6	0.0504	0.0568	0.0399	0.0375	0.0352	0.0431	0.0414	0.025		0.0504	0.0567	0.0409	0.0379	0.0352	0.0426	0.0405	0.0258		0.00136286	0.0111257	-0.00957857	-0.00357286	0.00585143	0.00295143	-0.00671	0.00387286		1.85738e-06	0.000123782	9.1749e-05	1.27653e-05	3.42392e-05	8.71093e-06	4.50241e-05	1.4999e-05
35.8	0.0495129	0.0627757	0.0331714	0.0349271	0.0406514	0.0483514	0.03474	0.0283229		35.8	0.0502	0.0565	0.0398	0.0375	0.0349	0.0433	0.0414	0.0272		0.0502	0.0564	0.0409	0.0379	0.0351	0.0425	0.0405	0.0255		-0.000687143	0.00627571	-0.00662857	-0.00257286	0.00575143	0.00505143	-0.00666	0.00112286		4.72165e-07	3.93846e-05	4.3938e-05	6.61959e-06	3.30789e-05	2.55169e-05	4.43556e-05	1.26081e-06
36	0.0513129	0.0647257	0.0341714	0.0306271	0.0381014	0.0537514	0.03324	0.0252729		36	0.0499	0.056	0.0395	0.0375	0.0346	0.0435	0.0411	0.0249		0.0499	0.056	0.0407	0.0379	0.035	0.0424	0.0405	0.0237		0.00141286	0.00872571	-0.00532857	-0.00687286	0.00350143	0.0102514	-0.00786	0.000372857		1.99617e-06	7.61381e-05	2.83937e-05	4.72362e-05	1.226e-05	0.000105092	6.17796e-05	1.39022e-07
36.2	0.0516629	0.0636257	0.0324214	0.0356271	0.0345014	0.0519514	0.03644	0.0281229		36.2	0.0496	0.0556	0.0394	0.0374	0.0345	0.0433	0.0408	0.022		0.0496	0.0555	0.0405	0.0378	0.035	0.0422	0.0404	0.0248		0.00206286	0.00802571	-0.00697857	-0.00177286	1.42857e-06	0.00865143	-0.00436	0.00612286		4.25538e-06	6.44121e-05	4.87005e-05	3.14302e-06	2.04082e-12	7.48472e-05	1.90096e-05	3.74894e-05
36.4	0.0511629	0.0647757	0.0313714	0.0320771	0.0333514	0.0427514	0.03569	0.0279229		36.4	0.0492	0.0551	0.0393	0.0374	0.0345	0.0429	0.0405	0.0246		0.0493	0.0551	0.0402	0.0376	0.0349	0.0419	0.0403	0.0268		0.00196286	0.00967571	-0.00792857	-0.00532286	-0.00114857	-0.000148571	-0.00481	0.00332286		3.85281e-06	9.36194e-05	6.28622e-05	2.83328e-05	1.31922e-06	2.20735e-08	2.31361e-05	1.10414e-05
36.6	0.0540129	0.0656257	0.0291214	0.0359771	0.0377514	0.0467514	0.03684	0.0275229		36.6	0.0489	0.0549	0.0391	0.0372	0.0344	0.0426	0.0403	0.0249		0.0489	0.0548	0.04	0.0374	0.0347	0.0417	0.0402	0.0235		0.00511286	0.0107257	-0.00997857	-0.00122286	0.00335143	0.00415143	-0.00346	0.00262286		2.61413e-05	0.000115041	9.95719e-05	1.49538e-06	1.12321e-05	1.72344e-05	1.19716e-05	6.87938e-06
36.8	0.0527629	0.0627257	0.0317214	0.0354771	0.0379514	0.0501514	0.03554	0.0256229		36.8	0.0486	0.0547	0.0389	0.037	0.0342	0.0423	0.0404	0.0236		0.0487	0.0546	0.0399	0.0372	0.0345	0.0416	0.04	0.0254		0.00416286	0.00802571	-0.00717857	-0.00152286	0.00375143	0.00785143	-0.00486	0.00202286		1.73294e-05	6.44121e-05	5.15319e-05	2.31909e-06	1.40732e-05	6.16449e-05	2.36196e-05	4.09195e-06
37	0.0525629	0.0611257	0.0303214	0.0297771	0.0395514	0.0487014	0.03369	0.0268229		37	0.0486	0.0546	0.0387	0.0366	0.0339	0.0421	0.0404	0.0243		0.0487	0.0545	0.0397	0.0369	0.0343	0.0414	0.0398	0.0252		0.00396286	0.00652571	-0.00837857	-0.00682286	0.00565143	0.00660143	-0.00671	0.00252286		1.57042e-05	4.25849e-05	7.02005e-05	4.65514e-05	3.19386e-05	4.35789e-05	4.50241e-05	6.36481e-06
37.2	0.0549629	0.0626757	0.0289214	0.0399271	0.0336514	0.0474514	0.03389	0.0290729		37.2	0.0485	0.0546	0.0385	0.0363	0.0336	0.0418	0.0401	0.0259		0.0486	0.0545	0.0396	0.0367	0.0341	0.0412	0.0396	0.0234		0.00646286	0.00807571	-0.00957857	0.00362714	5.14286e-05	0.00565143	-0.00621	0.00317286		4.17685e-05	6.52172e-05	9.1749e-05	1.31562e-05	2.6449e-09	3.19386e-05	3.85641e-05	1.0067e-05
37.4	0.0527129	0.0641257	0.0289214	0.0313271	0.0328014	0.0444514	0.03289	0.0293229		37.4	0.0484	0.0546	0.0384	0.0362	0.0335	0.0416	0.0397	0.026		0.0485	0.0545	0.0395	0.0366	0.0339	0.0411	0.0394	0.0235		0.00431286	0.00952571	-0.00947857	-0.00487286	-0.000698571	0.00285143	-0.00681	0.00332286		1.86007e-05	9.07392e-05	8.98433e-05	2.37447e-05	4.88002e-07	8.13064e-06	4.63761e-05	1.10414e-05
37.6	0.0521629	0.0658257	0.0278714	0.0349771	0.0351514	0.0478014	0.03574	0.0255729		37.6	0.0484	0.0546	0.0384	0.0362	0.0335	0.0416	0.0394	0.0201		0.0485	0.0545	0.0394	0.0365	0.0339	0.041	0.0393	0.0247		0.00376286	0.0112257	-0.0105286	-0.00122286	0.00165143	0.00620143	-0.00366	0.00547286		1.41591e-05	0.000126017	0.000110851	1.49538e-06	2.72722e-06	3.84577e-05	1.33956e-05	2.99522e-05
37.8	0.0523629	0.0648757	0.0281714	0.0354271	0.0347514	0.0482014	0.02984	0.0270229		37.8	0.0483	0.0545	0.0385	0.0362	0.0336	0.0418	0.0396	0.0235		0.0484	0.0544	0.0395	0.0365	0.0339	0.0409	0.0394	0.0263		0.00406286	0.0103757	-0.0103286	-0.000772857	0.00115143	0.00640143	-0.00976	0.00352286		1.65068e-05	0.000107655	0.000106679	5.97308e-07	1.32579e-06	4.09783e-05	9.52576e-05	1.24105e-05
38	0.0523129	0.0597757	0.0307214	0.0312271	0.0330014	0.0491014	0.03324	0.0269229		38	0.0483	0.0543	0.0386	0.0362	0.0335	0.0419	0.0398	0.0248		0.0483	0.0542	0.0395	0.0364	0.0338	0.0408	0.0394	0.0241		0.00401286	0.00547571	-0.00787857	-0.00497286	-0.000498571	0.00720143	-0.00656	0.00212286		1.6103e-05	2.99834e-05	6.20719e-05	2.47293e-05	2.48573e-07	5.18606e-05	4.30336e-05	4.50652e-06
38.2	0.0518629	0.0624757	0.0325214	0.0364771	0.0344514	0.0449514	0.03274	0.0275229		38.2	0.0481	0.054	0.0384	0.0361	0.0334	0.0418	0.0398	0.0214		0.0481	0.0539	0.0394	0.0363	0.0338	0.0408	0.0394	0.0238		0.00376286	0.00847571	-0.00587857	0.000377143	0.00105143	0.00315143	-0.00706	0.00612286		1.41591e-05	7.18377e-05	3.45576e-05	1.42237e-07	1.1055e-06	9.9315e-06	4.98436e-05	3.74894e-05
38.4	0.0513629	0.0618257	0.0311714	0.0320271	0.0362514	0.0450514	0.03429	0.0299229		38.4	0.0479	0.0537	0.0382	0.0358	0.0332	0.0415	0.0394	0.0231		0.048	0.0537	0.0393	0.0362	0.0336	0.0407	0.0392	0.0234		0.00346286	0.00812571	-0.00702857	-0.00377286	0.00305143	0.00355143	-0.00511	0.00682286		1.19914e-05	6.60272e-05	4.94008e-05	1.42345e-05	9.31122e-06	1.26126e-05	2.61121e-05	4.65514e-05
38.6	0.0512129	0.0631257	0.0299214	0.0336771	0.0388014	0.0462514	0.03479	0.0286229		38.6	0.0477	0.0535	0.0381	0.0357	0.0331	0.0413	0.039	0.0245		0.0478	0.0534	0.0391	0.0361	0.0335	0.0406	0.039	0.0233		0.00351286	0.00962571	-0.00817857	-0.00202286	0.00570143	0.00495143	-0.00421	0.00412286		1.23402e-05	9.26544e-05	6.6889e-05	4.09195e-06	3.25063e-05	2.45166e-05	1.77241e-05	1.6998e-05
38.8	0.0496629	0.0630757	0.0321714	0.0331771	0.0388514	0.0469014	0.02974	0.0293229		38.8	0.0475	0.0532	0.038	0.0356	0.0331	0.0411	0.0389	0.0245		0.0475	0.0532	0.0389	0.036	0.0333	0.0405	0.0388	0.0237		0.00216286	0.00987571	-0.00582857	-0.00242286	0.00575143	0.00580143	-0.00916	0.00482286		4.67795e-06	9.75297e-05	3.39722e-05	5.87024e-06	3.30789e-05	3.36566e-05	8.39056e-05	2.326e-05
39	0.0498629	0.0628257	0.0314214	0.0330771	0.0350014	0.0460514	0.04094	0.0281229		39	0.0473	0.053	0.0379	0.0355	0.0329	0.041	0.0391	0.0223		0.0473	0.0529	0.0388	0.0359	0.0331	0.0403	0.0387	0.0251		0.00256286	0.00982571	-0.00647857	-0.00242286	0.00210143	0.00505143	0.00184	0.00582286		6.56824e-06	9.65447e-05	4.19719e-05	5.87024e-06	4.416e-06	2.55169e-05	3.3856e-06	3.39057e-05
39.2	0.0486629	0.0612257	0.0295714	0.0327771	0.0369514	0.0438014	0.02899	0.0265729		39.2	0.0471	0.0527	0.0377	0.0355	0.0327	0.0409	0.0392	0.0244		0.0471	0.0527	0.0387	0.0358	0.033	0.0401	0.0385	0.026		0.00156286	0.00852571	-0.00812857	-0.00272286	0.00425143	0.00290143	-0.01021	0.00217286		2.44252e-06	7.26878e-05	6.60737e-05	7.41395e-06	1.80746e-05	8.41829e-06	0.000104244	4.72131e-06
39.4	0.0514629	0.0609757	0.0294714	0.0283271	0.0346014	0.0466014	0.03264	0.0277229		39.4	0.0468	0.0526	0.0375	0.0353	0.0324	0.0407	0.039	0.0263		0.0469	0.0525	0.0386	0.0356	0.0329	0.04	0.0384	0.0225		0.00466286	0.00837571	-0.00802857	-0.00697286	0.00220143	0.00590143	-0.00636	0.00142286		2.17422e-05	7.01526e-05	6.4458e-05	4.86207e-05	4.84629e-06	3.48269e-05	4.04496e-05	2.02452e-06
39.6	0.0513129	0.0649757	0.0311214	0.0360771	0.0328014	0.0461014	0.02884	0.0253229		39.6	0.0466	0.0525	0.0374	0.0352	0.0323	0.0405	0.0387	0.024		0.0466	0.0525	0.0384	0.0355	0.0329	0.0398	0.0383	0.0232		0.00471286	0.0124757	-0.00627857	0.000877143	0.000501429	0.00560143	-0.00986	0.00132286		2.2211e-05	0.000155643	3.94205e-05	7.6938e-07	2.51431e-07	3.1376e-05	9.72196e-05	1.74995e-06
39.8	0.0522629	0.0593257	0.0288714	0.0292771	0.0308014	0.0430514	0.03239	0.0275729		39.8	0.0464	0.0526	0.0374	0.035	0.0323	0.0405	0.0384	0.0206		0.0465	0.0525	0.0383	0.0354	0.0329	0.0397	0.0383	0.024		0.00586286	0.00672571	-0.00852857	-0.00572286	-0.00149857	0.00255143	-0.00601	0.00697286		3.43731e-05	4.52352e-05	7.27365e-05	3.27511e-05	2.24572e-06	6.50979e-06	3.61201e-05	4.86207e-05
40	0.0506129	0.0638257	0.0299214	0.0319771	0.0334014	0.0424014	0.03339	0.0261229		40	0.0465	0.0527	0.0375	0.035	0.0323	0.0405	0.0382	0.023		0.0466	0.0526	0.0383	0.0353	0.0328	0.0397	0.0382	0.0247		0.00411286	0.0111257	-0.00757857	-0.00302286	0.00110143	0.00190143	-0.00481	0.00312286		1.69156e-05	0.000123782	5.74347e-05	9.13767e-06	1.21314e-06	3.61543e-06	2.31361e-05	9.75224e-06
40.2	0.0487629	0.0625257	0.0305714	0.0319271	0.0348514	0.0427514	0.03199	0.0269229		40.2	0.0467	0.0528	0.0374	0.0349	0.0322	0.0404	0.0382	0.0252		0.0467	0.0528	0.0382	0.0351	0.0326	0.0397	0.038	0.0227		0.00206286	0.00972571	-0.00682857	-0.00297286	0.00265143	0.00235143	-0.00621	0.00172286		4.25538e-06	9.45895e-05	4.66294e-05	8.83788e-06	7.03007e-06	5.52922e-06	3.85641e-05	2.96824e-06
40.4	0.0516629	0.0630757	0.0273714	0.0303771	0.0363514	0.0476514	0.03319	0.0279229		40.4	0.0468	0.053	0.0372	0.0348	0.0321	0.0402	0.0382	0.0239		0.0468	0.0529	0.0381	0.035	0.0324	0.0397	0.0379	0.0233		0.00486286	0.0100757	-0.00982857	-0.00442286	0.00425143	0.00745143	-0.00501	0.00402286		2.36474e-05	0.00010152	9.66008e-05	1.95617e-05	1.80746e-05	5.55238e-05	2.51001e-05	1.61834e-05
40.6	0.0490629	0.0622757	0.0303214	0.0348271	0.0328514	0.0401014	0.02919	0.0247229		40.6	0.047	0.0529	0.0371	0.0347	0.0319	0.0401	0.0381	0.0221		0.047	0.0529	0.0381	0.0349	0.0322	0.0396	0.0377	0.0245		0.00206286	0.00937571	-0.00677857	0.000127143	0.000951429	1.42857e-06	-0.00891	0.00262286		4.25538e-06	8.7904e-05	4.5949e-05	1.61653e-08	9.05216e-07	2.04082e-12	7.93881e-05	6.87938e-06
40.8	0.0503629	0.0608257	0.0292214	0.0303271	0.0356514	0.0465514	0.03184	0.0254229		40.8	0.047	0.0527	0.037	0.0346	0.0319	0.0402	0.0379	0.0236		0.047	0.0526	0.038	0.0349	0.0322	0.0396	0.0376	0.0236		0.00336286	0.00812571	-0.00777857	-0.00427286	0.00375143	0.00635143	-0.00606	0.00182286		1.13088e-05	6.60272e-05	6.05062e-05	1.82573e-05	1.40732e-05	4.03406e-05	3.67236e-05	3.32281e-06
41	0.0490129	0.0596757	0.0309714	0.0320271	0.0339514	0.0429014	0.02929	0.0256229		41	0.0469	0.0525	0.037	0.0346	0.0319	0.0404	0.0379	0.0244		0.0469	0.0524	0.038	0.035	0.0322	0.0395	0.0376	0.0231		0.00211286	0.00717571	-0.00602857	-0.00257286	0.00205143	0.00250143	-0.00861	0.00122286		4.46417e-06	5.14909e-05	3.63437e-05	6.61959e-06	4.20836e-06	6.25714e-06	7.41321e-05	1.49538e-06
41.2	0.0494129	0.0617757	0.0306214	0.0294271	0.0345014	0.0454514	0.03449	0.0285229		41.2	0.0467	0.0522	0.0371	0.0346	0.0319	0.0405	0.0381	0.0201		0.0467	0.0521	0.038	0.035	0.0323	0.0394	0.0377	0.0246		0.00271286	0.00957571	-0.00647857	-0.00517286	0.00260143	0.00495143	-0.00361	0.00842286		7.35959e-06	9.16943e-05	4.19719e-05	2.67585e-05	6.76743e-06	2.45166e-05	1.30321e-05	7.09445e-05
41.4	0.0504129	0.0595757	0.0294714	0.0307771	0.0358514	0.0458014	0.03064	0.0252729		41.4	0.0464	0.0518	0.0371	0.0347	0.032	0.0403	0.0383	0.022		0.0464	0.0517	0.0379	0.0349	0.0323	0.0393	0.0379	0.0257		0.00401286	0.00777571	-0.00762857	-0.00392286	0.00385143	0.00550143	-0.00766	0.00327286		1.6103e-05	6.04617e-05	5.81951e-05	1.53888e-05	1.48335e-05	3.02657e-05	5.86756e-05	1.07116e-05
41.6	0.0482129	0.0614257	0.0266714	0.0315771	0.0367014	0.0417014	0.03189	0.0243229		41.6	0.046	0.0515	0.0369	0.0347	0.0319	0.04	0.0383	0.0243		0.046	0.0514	0.0378	0.0348	0.0322	0.0392	0.0379	0.0218		0.00221286	0.00992571	-0.0102286	-0.00312286	0.00480143	0.00170143	-0.00641	2.28571e-05		4.89674e-06	9.85198e-05	0.000104624	9.75224e-06	2.30537e-05	2.89486e-06	4.10881e-05	5.22449e-10
41.8	0.0491129	0.0576257	0.0272714	0.0327771	0.0367014	0.0449014	0.03069	0.0259229		41.8	0.0456	0.0512	0.0367	0.0346	0.0317	0.0398	0.0381	0.0247		0.0457	0.0512	0.0376	0.0347	0.0321	0.0391	0.0378	0.0227		0.00351286	0.00642571	-0.00942857	-0.00182286	0.00500143	0.00510143	-0.00741	0.00122286		1.23402e-05	4.12898e-05	8.8898e-05	3.32281e-06	2.50143e-05	2.60246e-05	5.49081e-05	1.49538e-06
42	0.0467629	0.0611257	0.0289714	0.0306271	0.0369514	0.0461014	0.03074	0.0266229		42	0.0454	0.051	0.0365	0.0342	0.0316	0.0397	0.0378	0.0197		0.0454	0.0509	0.0374	0.0345	0.0319	0.0389	0.0375	0.023		0.00136286	0.0101257	-0.00752857	-0.00357286	0.00535143	0.00640143	-0.00706	0.00692286		1.85738e-06	0.00010253	5.66794e-05	1.27653e-05	2.86378e-05	4.09783e-05	4.98436e-05	4.7926e-05
42.2	0.0496629	0.0588257	0.0280214	0.0305271	0.0362014	0.0452514	0.03129	0.0245729		42.2	0.0452	0.0508	0.0364	0.0339	0.0314	0.0396	0.0375	0.0221		0.0453	0.0507	0.0372	0.0343	0.0317	0.0388	0.0371	0.0233		0.00446286	0.00802571	-0.00837857	-0.00337286	0.00480143	0.00565143	-0.00621	0.00247286		1.99171e-05	6.44121e-05	7.02005e-05	1.13762e-05	2.30537e-05	3.19386e-05	3.85641e-05	6.11502e-06
42.4	0.0474629	0.0618757	0.0287214	0.0317271	0.0356514	0.0414014	0.02929	0.0246229		42.4	0.0452	0.0507	0.0364	0.0337	0.0312	0.0395	0.0373	0.0238		0.0452	0.0506	0.0371	0.0341	0.0315	0.0387	0.0369	0.0224		0.00226286	0.0111757	-0.00767857	-0.00197286	0.00445143	0.00190143	-0.00801	0.000822857		5.12052e-06	0.000124897	5.89605e-05	3.89217e-06	1.98152e-05	3.61543e-06	6.41601e-05	6.77094e-07
42.6	0.0486629	0.0567257	0.0305714	0.0273771	0.0321514	0.0415514	0.03214	0.0245229		42.6	0.0451	0.0505	0.0362	0.0336	0.0311	0.0392	0.0372	0.0222		0.0451	0.0505	0.037	0.0339	0.0313	0.0386	0.0368	0.023		0.00356286	0.00622571	-0.00562857	-0.00622286	0.00105143	0.00235143	-0.00506	0.00232286		1.2694e-05	3.87595e-05	3.16808e-05	3.8724e-05	1.1055e-06	5.52922e-06	2.56036e-05	5.39567e-06
42.8	0.0461129	0.0598257	0.0276214	0.0344271	0.0323514	0.0472014	0.02909	0.0240729		42.8	0.045	0.0503	0.036	0.0336	0.031	0.0391	0.0372	0.0215		0.045	0.0503	0.0369	0.0338	0.0312	0.0385	0.0367	0.0232		0.00111286	0.00952571	-0.00837857	0.000827143	0.00135143	0.00810143	-0.00811	0.00257286		1.23845e-06	9.07392e-05	7.02005e-05	6.84165e-07	1.82636e-06	6.56331e-05	6.57721e-05	6.61959e-06
43	0.0459129	0.0586257	0.0279714	0.0283271	0.0356514	0.0450514	0.02839	0.0246229		43	0.0448	0.0501	0.0359	0.0335	0.0308	0.039	0.0372	0.023		0.0449	0.0501	0.0368	0.0337	0.0311	0.0383	0.0367	0.0234		0.00111286	0.00852571	-0.00792857	-0.00517286	0.00485143	0.00605143	-0.00881	0.00162286		1.23845e-06	7.26878e-05	6.28622e-05	2.67585e-05	2.35364e-05	3.66198e-05	7.76161e-05	2.63367e-06
43.2	0.0473129	0.0589257	0.0271714	0.0285271	0.0331514	0.0428514	0.02789	0.0226729		43.2	0.0446	0.0498	0.0358	0.0334	0.0306	0.0391	0.0371	0.0242		0.0447	0.0498	0.0368	0.0337	0.0311	0.0382	0.0367	0.021		0.00271286	0.00912571	-0.00862857	-0.00487286	0.00255143	0.00375143	-0.00921	-0.00152714		7.35959e-06	8.32787e-05	7.44522e-05	2.37447e-05	6.50979e-06	1.40732e-05	8.48241e-05	2.33217e-06
43.4	0.0485629	0.0584257	0.0314714	0.0324771	0.0332514	0.0459514	0.03494	0.0271729		43.4	0.0444	0.0495	0.0359	0.0332	0.0305	0.0391	0.0369	0.0215		0.0445	0.0495	0.0367	0.0337	0.031	0.0381	0.0366	0.0224		0.00416286	0.00892571	-0.00442857	-0.000722857	0.00275143	0.00685143	-0.00196	0.00567286		1.73294e-05	7.96684e-05	1.96122e-05	5.22522e-07	7.57036e-06	4.69421e-05	3.8416e-06	3.21813e-05
43.6	0.0456129	0.0577257	0.0275714	0.0292771	0.0324514	0.0452014	0.02939	0.0260729		43.6	0.0442	0.0493	0.0358	0.0332	0.0304	0.0389	0.0367	0.0208		0.0443	0.0493	0.0366	0.0336	0.0308	0.038	0.0363	0.0246		0.00141286	0.00842571	-0.00822857	-0.00392286	0.00205143	0.00630143	-0.00731	0.00527286		1.99617e-06	7.09927e-05	6.77094e-05	1.53888e-05	4.20836e-06	3.9708e-05	5.34361e-05	2.7803e-05
43.8	0.0480629	0.0585757	0.0268714	0.0309271	0.0306514	0.0487014	0.02849	0.0252229		43.8	0.044	0.0492	0.0357	0.0332	0.0304	0.0385	0.0365	0.0217		0.044	0.0492	0.0365	0.0335	0.0307	0.0379	0.0361	0.0231		0.00406286	0.00937571	-0.00882857	-0.00227286	0.000251429	0.0102014	-0.00801	0.00352286		1.65068e-05	8.7904e-05	7.79437e-05	5.16588e-06	6.32163e-08	0.000104069	6.41601e-05	1.24105e-05
44	0.0465629	0.0583257	0.0288214	0.0262771	0.0333014	0.0491514	0.03434	0.0224729		44	0.0439	0.0491	0.0355	0.0331	0.0304	0.0382	0.0363	0.023		0.0439	0.0491	0.0364	0.0333	0.0305	0.0378	0.0359	0.0223		0.00266286	0.00922571	-0.00667857	-0.00682286	0.00290143	0.0109514	-0.00196	-0.000527143		7.09081e-06	8.51138e-05	4.46033e-05	4.65514e-05	8.41829e-06	0.000119934	3.8416e-06	2.7788e-07
44.2	0.0467629	0.0595257	0.0273214	0.0303271	0.0293514	0.0465014	0.02574	0.0225729		44.2	0.0438	0.0492	0.0354	0.0329	0.0302	0.0381	0.0362	0.0242		0.0439	0.0491	0.0363	0.0331	0.0304	0.0375	0.0357	0.0229		0.00296286	0.0103257	-0.00807857	-0.00257286	-0.000848571	0.00840143	-0.01046	-0.00162714		8.77852e-06	0.00010662	6.52633e-05	6.61959e-06	7.20073e-07	7.0584e-05	0.000109412	2.64759e-06
44.4	0.0488129	0.0557257	0.0312714	0.0274271	0.0353514	0.0419514	0.03114	0.0243229		44.4	0.0437	0.0493	0.0353	0.0327	0.0299	0.0381	0.0361	0.0225		0.0438	0.0492	0.0362	0.033	0.0303	0.0373	0.0357	0.0242		0.00511286	0.00642571	-0.00402857	-0.00527286	0.00545143	0.00385143	-0.00496	0.00182286		2.61413e-05	4.12898e-05	1.62294e-05	2.7803e-05	2.97181e-05	1.48335e-05	2.46016e-05	3.32281e-06
44.6	0.0465629	0.0572257	0.0300214	0.0321771	0.0320514	0.0461014	0.02649	0.0241729		44.6	0.0437	0.0492	0.0354	0.0325	0.0297	0.0381	0.036	0.0196		0.0437	0.0491	0.0361	0.033	0.0303	0.0372	0.0358	0.0226		0.00286286	0.00802571	-0.00537857	-0.000322857	0.00235143	0.00800143	-0.00951	0.00457286		8.19595e-06	6.44121e-05	2.8929e-05	1.04237e-07	5.52922e-06	6.40229e-05	9.04401e-05	2.0911e-05
44.8	0.0478629	0.0608757	0.0291214	0.0306771	0.0334514	0.0487014	0.03209	0.0272729		44.8	0.0436	0.0491	0.0354	0.0325	0.0297	0.0379	0.036	0.0222		0.0436	0.049	0.0361	0.0329	0.0303	0.0372	0.0359	0.0222		0.00426286	0.0117757	-0.00627857	-0.00182286	0.00375143	0.0108014	-0.00391	0.00507286		1.8172e-05	0.000138667	3.94205e-05	3.32281e-06	1.40732e-05	0.000116671	1.52881e-05	2.57339e-05
45	0.0458129	0.0612757	0.0294714	0.0255271	0.0277514	0.0466014	0.02974	0.0239229		45	0.0434	0.0489	0.0353	0.0326	0.0298	0.0378	0.036	0.0233		0.0434	0.0488	0.0361	0.0329	0.0303	0.0372	0.0359	0.0219		0.00241286	0.0123757	-0.00582857	-0.00707286	-0.00204857	0.00880143	-0.00626	0.000622857		5.82188e-06	0.000153158	3.39722e-05	5.00253e-05	4.19664e-06	7.74651e-05	3.91876e-05	3.87951e-07
45.2	0.0457129	0.0605757	0.0289714	0.0309271	0.0320514	0.0399514	0.02794	0.0267729		45.2	0.0433	0.0486	0.0351	0.0327	0.0299	0.0378	0.036	0.0223		0.0433	0.0486	0.036	0.0328	0.0302	0.0373	0.0358	0.0219		0.00241286	0.0119757	-0.00612857	-0.00177286	0.00215143	0.00215143	-0.00806	0.00447286		5.82188e-06	0.000143418	3.75594e-05	3.14302e-06	4.62864e-06	4.62864e-06	6.49636e-05	2.00065e-05
45.4	0.0478129	0.0573257	0.0303714	0.0265271	0.0309014	0.0453014	0.03009	0.0255729		45.4	0.0431	0.0483	0.035	0.0325	0.0299	0.0379	0.036	0.0209		0.0431	0.0483	0.0359	0.0327	0.0301	0.0372	0.0356	0.0205		0.00471286	0.00902571	-0.00462857	-0.00597286	0.00100143	0.00740143	-0.00591	0.00467286		2.2211e-05	8.14635e-05	2.14237e-05	3.5675e-05	1.00286e-06	5.47811e-05	3.49281e-05	2.18356e-05
45.6	0.0465629	0.0601757	0.0276214	0.0290271	0.0342014	0.0484514	0.03014	0.0235729		45.6	0.0429	0.0479	0.0349	0.0323	0.0297	0.038	0.0358	0.0226		0.043	0.0479	0.0357	0.0326	0.03	0.0371	0.0354	0.0216		0.00366286	0.0122757	-0.00727857	-0.00327286	0.00450143	0.0104514	-0.00566	0.000972857		1.34165e-05	0.000150693	5.29776e-05	1.07116e-05	2.02629e-05	0.000109232	3.20356e-05	9.46451e-07
45.8	0.0457129	0.0547757	0.0292214	0.0316271	0.0346514	0.0436514	0.02954	0.0258229		45.8	0.0428	0.0475	0.0348	0.032	0.0294	0.0379	0.0356	0.0233		0.0428	0.0475	0.0355	0.0324	0.0298	0.037	0.0352	0.0229		0.00291286	0.00727571	-0.00557857	-0.000372857	0.00525143	0.00575143	-0.00606	0.00252286		8.48474e-06	5.2936e-05	3.11205e-05	1.39022e-07	2.75775e-05	3.30789e-05	3.67236e-05	6.36481e-06
46	0.0483129	0.0565257	0.0274214	0.0275271	0.0301514	0.0417514	0.03054	0.0260729		46	0.0426	0.0471	0.0346	0.0318	0.0293	0.0375	0.0354	0.0188		0.0426	0.0471	0.0353	0.0322	0.0297	0.0368	0.0351	0.0239		0.00571286	0.00942571	-0.00717857	-0.00427286	0.000851429	0.00425143	-0.00486	0.00727286		3.26367e-05	8.88441e-05	5.15319e-05	1.82573e-05	7.24931e-07	1.80746e-05	2.36196e-05	5.28945e-05
46.2	0.0469629	0.0621757	0.0286714	0.0270271	0.0349014	0.0418514	0.02774	0.0243229		46.2	0.0423	0.0467	0.0343	0.0317	0.0292	0.0372	0.0352	0.0202		0.0423	0.0466	0.0351	0.0321	0.0295	0.0366	0.035	0.0208		0.00466286	0.0154757	-0.00562857	-0.00467286	0.00570143	0.00465143	-0.00746	0.00412286		2.17422e-05	0.000239498	3.16808e-05	2.18356e-05	3.25063e-05	2.16358e-05	5.56516e-05	1.6998e-05
46.4	0.0442629	0.0553257	0.0291214	0.0304271	0.0314014	0.0485014	0.02914	0.0252729		46.4	0.0419	0.0462	0.0341	0.0318	0.0292	0.0369	0.0352	0.0229		0.042	0.0462	0.035	0.0319	0.0294	0.0364	0.0349	0.0191		0.00236286	0.00912571	-0.00497857	-0.00137286	0.00220143	0.0116014	-0.00606	0.00237286		5.58309e-06	8.32787e-05	2.47862e-05	1.88474e-06	4.84629e-06	0.000134593	3.67236e-05	5.63045e-06
46.6	0.0468129	0.0599257	0.0301714	0.0261271	0.0314014	0.0454514	0.02894	0.0228729		46.6	0.0415	0.046	0.0341	0.0317	0.029	0.0369	0.0353	0.0235		0.0416	0.0459	0.0349	0.0318	0.0292	0.0362	0.0348	0.0209		0.00531286	0.0139257	-0.00392857	-0.00557286	0.00240143	0.00855143	-0.00636	-0.000627143		2.82265e-05	0.000193926	1.54337e-05	3.10567e-05	5.76686e-06	7.31269e-05	4.04496e-05	3.93308e-07
46.8	0.0451629	0.0569757	0.0304214	0.0292771	0.0307514	0.0422514	0.03109	0.0214229		46.8	0.0411	0.0459	0.034	0.0315	0.0288	0.0368	0.0353	0.0196		0.0411	0.0458	0.0347	0.0317	0.0291	0.036	0.0347	0.0229		0.00406286	0.0110757	-0.00357857	-0.00222286	0.00195143	0.00545143	-0.00421	0.00182286		1.65068e-05	0.000122671	1.28062e-05	4.94109e-06	3.80807e-06	2.97181e-05	1.77241e-05	3.32281e-06
47	0.0470129	0.0546257	0.0283714	0.0255771	0.0290014	0.0427514	0.02979	0.0257729		47	0.0409	0.0461	0.034	0.0313	0.0286	0.0366	0.0351	0.0203		0.0409	0.046	0.0346	0.0317	0.029	0.0359	0.0346	0.021		0.00611286	0.00852571	-0.00562857	-0.00572286	0.000401429	0.00615143	-0.00531	0.00547286		3.7367e-05	7.26878e-05	3.16808e-05	3.27511e-05	1.61145e-07	3.78401e-05	2.81961e-05	2.99522e-05
47.2	0.0455129	0.0554257	0.0296714	0.0312771	0.0289014	0.0442014	0.02639	0.0244229		47.2	0.0409	0.0464	0.0339	0.031	0.0284	0.0364	0.0347	0.0221		0.0409	0.0463	0.0346	0.0315	0.0288	0.0358	0.0344	0.0195		0.00461286	0.00902571	-0.00422857	0.000277143	0.000501429	0.00780143	-0.00831	0.00232286		2.12785e-05	8.14635e-05	1.78808e-05	7.68082e-08	2.51431e-07	6.08623e-05	6.90561e-05	5.39567e-06
47.4	0.0476129	0.0546257	0.0284214	0.0290271	0.0315014	0.0433014	0.02864	0.0250229		47.4	0.041	0.0467	0.0338	0.0309	0.0283	0.0361	0.0343	0.0222		0.0411	0.0467	0.0346	0.0313	0.0286	0.0356	0.0341	0.0211		0.00661286	0.00792571	-0.00537857	-0.00187286	0.00320143	0.00720143	-0.00566	0.00282286		4.37299e-05	6.28169e-05	2.8929e-05	3.50759e-06	1.02491e-05	5.18606e-05	3.20356e-05	7.96852e-06
47.6	0.0437129	0.0579757	0.0309714	0.0255271	0.0331014	0.0472014	0.02744	0.0250229		47.6	0.0413	0.047	0.0337	0.0308	0.0281	0.036	0.034	0.0199		0.0414	0.0469	0.0345	0.0311	0.0284	0.0356	0.0338	0.0222		0.00241286	0.0109757	-0.00272857	-0.00527286	0.00500143	0.0112014	-0.00656	0.00512286		5.82188e-06	0.000120466	7.4451e-06	2.7803e-05	2.50143e-05	0.000125472	4.30336e-05	2.62437e-05
47.8	0.0464129	0.0557257	0.0277714	0.0311771	0.0390014	0.0444014	0.02629	0.0254729		47.8	0.0416	0.0471	0.0337	0.0308	0.028	0.0361	0.0339	0.0208		0.0416	0.0471	0.0345	0.031	0.0283	0.0355	0.0335	0.0206		0.00481286	0.00862571	-0.00592857	0.000377143	0.0110014	0.00830143	-0.00761	0.00467286		2.31636e-05	7.44029e-05	3.5148e-05	1.42237e-07	0.000121031	6.89137e-05	5.79121e-05	2.18356e-05
48	0.0445629	0.0524757	0.0275214	0.0268271	0.0294014	0.0440014	0.03274	0.0238729		48	0.0418	0.0471	0.0337	0.0308	0.0279	0.0363	0.0339	0.022		0.0418	0.047	0.0345	0.031	0.0283	0.0355	0.0335	0.0204		0.00276286	0.00537571	-0.00617857	-0.00397286	0.00150143	0.00770143	-0.00116	0.00187286		7.63338e-06	2.88983e-05	3.81747e-05	1.57836e-05	2.25429e-06	5.9312e-05	1.3456e-06	3.50759e-06
48.2	0.0455129	0.0571257	0.0256714	0.0269771	0.0323514	0.0438014	0.02619	0.0259729		48.2	0.0418	0.0469	0.0338	0.0307	0.0278	0.0364	0.0339	0.0231		0.0418	0.0469	0.0346	0.0311	0.0283	0.0356	0.0336	0.0216		0.00371286	0.0102257	-0.00812857	-0.00372286	0.00455143	0.00740143	-0.00771	0.00287286		1.37853e-05	0.000104565	6.60737e-05	1.38597e-05	2.07155e-05	5.47811e-05	5.94441e-05	8.25331e-06
48.4	0.0435129	0.0540257	0.0278214	0.0323271	0.0305014	0.0444014	0.02654	0.0256229		48.4	0.0417	0.0467	0.0339	0.0307	0.0279	0.0364	0.034	0.0187		0.0417	0.0466	0.0347	0.0312	0.0284	0.0356	0.0339	0.0228		0.00181286	0.00732571	-0.00607857	0.00162714	0.00260143	0.00800143	-0.00746	0.00692286		3.28645e-06	5.36661e-05	3.6949e-05	2.64759e-06	6.76743e-06	6.40229e-05	5.56516e-05	4.7926e-05
48.6	0.0443629	0.0534257	0.0294214	0.0246271	0.0280514	0.0409514	0.02674	0.0258229		48.6	0.0415	0.0463	0.0338	0.0307	0.028	0.0363	0.034	0.0196		0.0416	0.0463	0.0346	0.0312	0.0285	0.0356	0.0341	0.0216		0.00286286	0.00712571	-0.00437857	-0.00607286	5.14286e-05	0.00465143	-0.00726	0.00622286		8.19595e-06	5.07758e-05	1.91719e-05	3.68796e-05	2.6449e-09	2.16358e-05	5.27076e-05	3.8724e-05
48.8	0.0429629	0.0541257	0.0278714	0.0308271	0.0319514	0.0400514	0.02779	0.0251729		48.8	0.0412	0.046	0.0336	0.0308	0.0282	0.0362	0.0342	0.0215		0.0412	0.0459	0.0344	0.0311	0.0284	0.0355	0.0342	0.0212		0.00176286	0.00812571	-0.00572857	2.71429e-05	0.00375143	0.00385143	-0.00641	0.00367286		3.10767e-06	6.60272e-05	3.28165e-05	7.36735e-10	1.40732e-05	1.48335e-05	4.10881e-05	1.34899e-05
49	0.0435129	0.0559257	0.0264714	0.0273771	0.0325514	0.0473514	0.03049	0.0233229		49	0.0408	0.0455	0.0333	0.0309	0.0282	0.0361	0.0343	0.0228		0.0409	0.0454	0.0341	0.0311	0.0283	0.0354	0.034	0.0211		0.00271286	0.0104257	-0.00682857	-0.00352286	0.00435143	0.0112514	-0.00381	0.000522857		7.35959e-06	0.000108696	4.66294e-05	1.24105e-05	1.89349e-05	0.000126595	1.45161e-05	2.7338e-07
49.2	0.0438129	0.0541257	0.0278714	0.0263271	0.0308514	0.0433514	0.02884	0.0237229		49.2	0.0405	0.0449	0.0332	0.0309	0.0281	0.0359	0.0343	0.0205		0.0406	0.0449	0.0338	0.031	0.0283	0.0353	0.0338	0.0224		0.00331286	0.00922571	-0.00532857	-0.00457286	0.00275143	0.00745143	-0.00546	0.00322286		1.0975e-05	8.51138e-05	2.83937e-05	2.0911e-05	7.57036e-06	5.55238e-05	2.98116e-05	1.03868e-05
49.4	0.0420129	0.0520257	0.0283214	0.0362771	0.0302014	0.0446514	0.02749	0.0240229		49.4	0.0402	0.0443	0.033	0.0307	0.0279	0.0358	0.0341	0.0193		0.0402	0.0443	0.0336	0.0309	0.0282	0.0351	0.0335	0.0224		0.00181286	0.00772571	-0.00467857	0.00557714	0.00230143	0.00885143	-0.00661	0.00472286		3.28645e-06	5.96867e-05	2.1889e-05	3.11045e-05	5.29657e-06	7.83478e-05	4.36921e-05	2.23054e-05
49.6	0.0411629	0.0527757	0.0296214	0.0219271	0.0287014	0.0462514	0.02784	0.0240229		49.6	0.0398	0.0437	0.0329	0.0303	0.0277	0.0356	0.0337	0.0209		0.0398	0.0437	0.0335	0.0307	0.0281	0.0349	0.0333	0.0206		0.00136286	0.00907571	-0.00327857	-0.00837286	0.00100143	0.0106514	-0.00586	0.00312286		1.85738e-06	8.23686e-05	1.0749e-05	7.01047e-05	1.00286e-06	0.000113453	3.43396e-05	9.75224e-06
49.8	0.0426129	0.0542257	0.0289214	0.0302771	0.0289514	0.0405014	0.02529	0.0249729		49.8	0.0393	0.0433	0.0326	0.03	0.0275	0.0354	0.0334	0.0224		0.0394	0.0433	0.0334	0.0304	0.0279	0.0348	0.0332	0.0219		0.00331286	0.0109257	-0.00367857	0.000277143	0.00145143	0.00510143	-0.00811	0.00257286		1.0975e-05	0.000119371	1.35319e-05	7.68082e-08	2.10664e-06	2.60246e-05	6.57721e-05	6.61959e-06
50	0.0432129	0.0514757	0.0273214	0.0216271	0.0314514	0.0424514	0.03074	0.0259229		50	0.0389	0.0429	0.0324	0.0298	0.0274	0.0351	0.0332	0.0219		0.039	0.0429	0.0332	0.0302	0.0277	0.0346	0.0332	0.0227		0.00431286	0.00857571	-0.00507857	-0.00817286	0.00405143	0.00735143	-0.00246	0.00402286		1.86007e-05	7.35429e-05	2.57919e-05	6.67956e-05	1.64141e-05	5.40435e-05	6.0516e-06	1.61834e-05
50.2	0.0407129	0.0523257	0.0259714	0.0291771	0.0279014	0.0404014	0.02699	0.0243729		50.2	0.0386	0.0427	0.0323	0.0298	0.0273	0.0349	0.0332	0.0195		0.0387	0.0427	0.033	0.0299	0.0275	0.0343	0.033	0.0214		0.00211286	0.00962571	-0.00632857	-0.000622857	0.000601429	0.00550143	-0.00621	0.00487286		4.46417e-06	9.26544e-05	4.00508e-05	3.87951e-07	3.61716e-07	3.02657e-05	3.85641e-05	2.37447e-05
50.4	0.0412129	0.0521757	0.0269714	0.0292771	0.0276514	0.0399514	0.02479	0.0245229		50.4	0.0383	0.0426	0.0321	0.0296	0.0271	0.0346	0.0332	0.0212		0.0384	0.0425	0.0328	0.0297	0.0273	0.0341	0.0329	0.0185		0.00291286	0.00957571	-0.00512857	-0.000322857	0.000551429	0.00535143	-0.00841	0.00332286		8.48474e-06	9.16943e-05	2.63022e-05	1.04237e-07	3.04073e-07	2.86378e-05	7.07281e-05	1.10414e-05
50.6	0.0414129	0.0526757	0.0270714	0.0244271	0.0319514	0.0432014	0.02874	0.0213229		50.6	0.0381	0.0424	0.032	0.0294	0.0267	0.0344	0.0331	0.0221		0.0381	0.0424	0.0327	0.0296	0.0271	0.0339	0.0327	0.0192		0.00331286	0.0102757	-0.00492857	-0.00497286	0.00525143	0.00880143	-0.00436	-0.000777143		1.0975e-05	0.00010559	2.42908e-05	2.47293e-05	2.75775e-05	7.74651e-05	1.90096e-05	6.03951e-07
50.8	0.0404629	0.0511757	0.0264214	0.0243271	0.0293514	0.0428014	0.02599	0.0237729		50.8	0.0379	0.0422	0.0319	0.0291	0.0264	0.0343	0.0327	0.0219		0.038	0.0421	0.0326	0.0295	0.0269	0.0338	0.0324	0.0208		0.00256286	0.00897571	-0.00547857	-0.00477286	0.00295143	0.00850143	-0.00671	0.00187286		6.56824e-06	8.05634e-05	3.00147e-05	2.27802e-05	8.71093e-06	7.22743e-05	4.50241e-05	3.50759e-06
51	0.0412629	0.0508257	0.0274714	0.0286771	0.0325514	0.0441514	0.02674	0.0233729		51	0.0378	0.0418	0.0318	0.0288	0.0262	0.0343	0.0324	0.0182		0.0378	0.0418	0.0326	0.0293	0.0267	0.0337	0.0322	0.0203		0.00346286	0.00902571	-0.00432857	-0.000122857	0.00635143	0.00985143	-0.00566	0.00517286		1.19914e-05	8.14635e-05	1.87365e-05	1.50939e-08	4.03406e-05	9.70506e-05	3.20356e-05	2.67585e-05
51.2	0.0428629	0.0508757	0.0266714	0.0228771	0.0287514	0.0445014	0.02914	0.0214729		51.2	0.0376	0.0415	0.0317	0.0287	0.0261	0.0342	0.0321	0.0191		0.0377	0.0415	0.0325	0.0292	0.0265	0.0336	0.0321	0.0182		0.00526286	0.00937571	-0.00502857	-0.00582286	0.00265143	0.0103014	-0.00296	0.00237286		2.76977e-05	8.7904e-05	2.52865e-05	3.39057e-05	7.03007e-06	0.000106119	8.7616e-06	5.63045e-06
51.4	0.0401129	0.0510257	0.0277214	0.0283271	0.0294014	0.0415014	0.02324	0.0252729		51.4	0.0374	0.0411	0.0316	0.0287	0.026	0.034	0.032	0.0209		0.0375	0.0411	0.0324	0.029	0.0263	0.0336	0.0318	0.0184		0.00271286	0.00992571	-0.00387857	-0.000372857	0.00340143	0.00750143	-0.00876	0.00437286		7.35959e-06	9.85198e-05	1.50433e-05	1.39022e-07	1.15697e-05	5.62714e-05	7.67376e-05	1.91219e-05
51.6	0.0375129	0.0506757	0.0272214	0.0268271	0.0279514	0.0444514	0.02854	0.0235229		51.6	0.0371	0.0406	0.0316	0.0287	0.026	0.0338	0.0319	0.0219		0.0372	0.0406	0.0322	0.0289	0.0261	0.0334	0.0316	0.0204		0.000412857	0.0100757	-0.00437857	-0.00187286	0.00195143	0.0106514	-0.00336	0.00162286		1.70451e-07	0.00010152	1.91719e-05	3.50759e-06	3.80807e-06	0.000113453	1.12896e-05	2.63367e-06
51.8	0.0387629	0.0517757	0.0282214	0.0222771	0.0284514	0.0430514	0.02829	0.0241229		51.8	0.0367	0.0403	0.0314	0.0285	0.0258	0.0335	0.0319	0.0194		0.0368	0.0403	0.032	0.0287	0.0261	0.0331	0.0314	0.0211		0.00206286	0.0114757	-0.00317857	-0.00622286	0.00265143	0.00955143	-0.00361	0.00472286		4.25538e-06	0.000131692	1.01033e-05	3.8724e-05	7.03007e-06	9.12298e-05	1.30321e-05	2.23054e-05
52	0.0388129	0.0512757	0.0277714	0.0311771	0.0260014	0.0385514	0.02509	0.0223229		52	0.0362	0.0402	0.0311	0.0282	0.0256	0.0333	0.0317	0.0171		0.0363	0.0401	0.0318	0.0285	0.026	0.0328	0.0313	0.0208		0.00261286	0.0110757	-0.00332857	0.00297714	0.000401429	0.00525143	-0.00661	0.00522286		6.82702e-06	0.000122671	1.10794e-05	8.86338e-06	1.61145e-07	2.75775e-05	4.36921e-05	2.72782e-05
52.2	0.0393129	0.0521257	0.0264214	0.0214771	0.0299514	0.0438514	0.02599	0.0198729		52.2	0.0359	0.0401	0.0309	0.028	0.0254	0.0331	0.0315	0.0185		0.036	0.04	0.0316	0.0284	0.026	0.0325	0.0313	0.0194		0.00341286	0.0120257	-0.00447857	-0.00652286	0.00455143	0.0107514	-0.00551	0.00137286		1.16476e-05	0.000144618	2.00576e-05	4.25477e-05	2.07155e-05	0.000115593	3.03601e-05	1.88474e-06
52.4	0.0414129	0.0513757	0.0275214	0.0264271	0.0319514	0.0433014	0.02529	0.0242229		52.4	0.0357	0.04	0.0307	0.0277	0.0253	0.0329	0.0313	0.0203		0.0358	0.0399	0.0315	0.0282	0.0258	0.0323	0.0313	0.0206		0.00571286	0.0113757	-0.00317857	-0.00127286	0.00665143	0.0104014	-0.00601	0.00392286		3.26367e-05	0.000129407	1.01033e-05	1.62017e-06	4.42415e-05	0.00010819	3.61201e-05	1.53888e-05
52.6	0.0398629	0.0520257	0.0267214	0.0230271	0.0340014	0.0451514	0.02694	0.0245229		52.6	0.0355	0.0399	0.0306	0.0277	0.0251	0.0326	0.0313	0.0211		0.0356	0.0399	0.0313	0.0281	0.0256	0.0321	0.0314	0.0219		0.00436286	0.0121257	-0.00387857	-0.00467286	0.00890143	0.0125514	-0.00436	0.00342286		1.90345e-05	0.000147033	1.50433e-05	2.18356e-05	7.92354e-05	0.000157538	1.90096e-05	1.1716e-05
52.8	0.0373129	0.0504757	0.0260714	0.0252771	0.0270514	0.0391514	0.02729	0.0240729		52.8	0.0355	0.0399	0.0305	0.0277	0.025	0.0324	0.0313	0.0195		0.0355	0.0399	0.0312	0.028	0.0254	0.0321	0.0313	0.0219		0.00181286	0.0105757	-0.00442857	-0.00242286	0.00205143	0.00675143	-0.00401	0.00457286		3.28645e-06	0.000111846	1.96122e-05	5.87024e-06	4.20836e-06	4.55818e-05	1.60801e-05	2.0911e-05
53	0.0372629	0.0514757	0.0258214	0.0255271	0.0269014	0.0402514	0.02404	0.0243729		53	0.0354	0.04	0.0305	0.0277	0.0249	0.0323	0.0312	0.0188		0.0355	0.0399	0.0311	0.0279	0.0253	0.032	0.0311	0.0191		0.00186286	0.0114757	-0.00467857	-0.00217286	0.00200143	0.00795143	-0.00716	0.00557286		3.47024e-06	0.000131692	2.1889e-05	4.72131e-06	4.00572e-06	6.32252e-05	5.12656e-05	3.10567e-05
53.2	0.0370129	0.0518257	0.0267714	0.0249271	0.0259514	0.0461014	0.02629	0.0240729		53.2	0.0354	0.0401	0.0304	0.0274	0.0248	0.0323	0.0309	0.0199		0.0355	0.0401	0.031	0.0278	0.0252	0.032	0.0307	0.0197		0.00161286	0.0117257	-0.00362857	-0.00247286	0.00115143	0.0138014	-0.00461	0.00417286		2.60131e-06	0.000137492	1.31665e-05	6.11502e-06	1.32579e-06	0.000190479	2.12521e-05	1.74127e-05
53.4	0.0396629	0.0519257	0.0268714	0.0241271	0.0251014	0.0446014	0.02569	0.0235729		53.4	0.0355	0.0403	0.0304	0.0272	0.0247	0.0324	0.0307	0.0209		0.0356	0.0402	0.031	0.0276	0.0251	0.0321	0.0303	0.0208		0.00416286	0.0116257	-0.00352857	-0.00307286	0.000401429	0.0122014	-0.00501	0.00267286		1.73294e-05	0.000135157	1.24508e-05	9.44245e-06	1.61145e-07	0.000148875	2.51001e-05	7.14417e-06
53.6	0.0362629	0.0504257	0.0267214	0.0282771	0.0300514	0.0425014	0.02529	0.0258229		53.6	0.0356	0.0404	0.0303	0.027	0.0246	0.0325	0.0304	0.02		0.0356	0.0403	0.0309	0.0275	0.0251	0.032	0.0301	0.0212		0.000662857	0.0100257	-0.00357857	0.00127714	0.00545143	0.0100014	-0.00511	0.00582286		4.3938e-07	0.000100515	1.28062e-05	1.63109e-06	2.97181e-05	0.000100029	2.61121e-05	3.39057e-05
53.8	0.0364629	0.0514257	0.0275214	0.0193771	0.0293514	0.0409514	0.02979	0.0230729		53.8	0.0357	0.0403	0.0302	0.0269	0.0245	0.0324	0.0303	0.0185		0.0357	0.0402	0.0309	0.0274	0.025	0.0319	0.0301	0.0196		0.000762857	0.0111257	-0.00267857	-0.00752286	0.00485143	0.00855143	-0.00051	0.00457286		5.81951e-07	0.000123782	7.17474e-06	5.65934e-05	2.35364e-05	7.31269e-05	2.601e-07	2.0911e-05
54	0.0383629	0.0479757	0.0283714	0.0280771	0.0269014	0.0391514	0.02549	0.0218229		54	0.0357	0.0402	0.0302	0.0271	0.0245	0.0323	0.0302	0.0195		0.0358	0.0402	0.0308	0.0274	0.025	0.0318	0.0302	0.0199		0.00266286	0.00777571	-0.00182857	0.000977143	0.00240143	0.00685143	-0.00471	0.00232286		7.09081e-06	6.04617e-05	3.34367e-06	9.54808e-07	5.76686e-06	4.69421e-05	2.21841e-05	5.39567e-06
54.2	0.0360129	0.0511257	0.0271714	0.0258271	0.0247514	0.0371014	0.02589	0.0229729		54.2	0.0357	0.0401	0.0301	0.0272	0.0246	0.0321	0.0304	0.0206		0.0357	0.04	0.0308	0.0274	0.0249	0.0316	0.0303	0.0207		0.000312857	0.0110257	-0.00292857	-0.00137286	0.000151429	0.00500143	-0.00451	0.00237286		9.78796e-08	0.000121566	8.57653e-06	1.88474e-06	2.29306e-08	2.50143e-05	2.03401e-05	5.63045e-06
54.4	0.0363629	0.0513757	0.0274214	0.0217771	0.0234014	0.0424514	0.02639	0.0221729		54.4	0.0356	0.0399	0.0301	0.0272	0.0245	0.0321	0.0306	0.0214		0.0356	0.0398	0.0307	0.0274	0.0248	0.0316	0.0304	0.021		0.000762857	0.0114757	-0.00267857	-0.00542286	-0.00109857	0.0103514	-0.00421	0.000772857		5.81951e-07	0.000131692	7.17474e-06	2.94074e-05	1.20686e-06	0.000107152	1.77241e-05	5.97308e-07
54.6	0.0353129	0.0501757	0.0261214	0.0253771	0.0234514	0.0426514	0.02419	0.0242729		54.6	0.0355	0.0396	0.0301	0.0271	0.0244	0.0321	0.0308	0.0198		0.0355	0.0396	0.0307	0.0274	0.0247	0.0315	0.0304	0.02		-0.000187143	0.0105757	-0.00397857	-0.00172286	-0.000948571	0.0105514	-0.00661	0.00447286		3.50224e-08	0.000111846	1.5829e-05	2.96824e-06	8.99788e-07	0.000111333	4.36921e-05	2.00065e-05
54.8	0.0348129	0.0478757	0.0260214	0.0244271	0.0280514	0.0461014	0.02404	0.0232229		54.8	0.0354	0.0394	0.03	0.0269	0.0243	0.0321	0.0307	0.0185		0.0354	0.0394	0.0306	0.0273	0.0246	0.0315	0.0303	0.019		-0.000587143	0.00847571	-0.00397857	-0.00247286	0.00375143	0.0140014	-0.00666	0.00472286		3.44737e-07	7.18377e-05	1.5829e-05	6.11502e-06	1.40732e-05	0.00019604	4.43556e-05	2.23054e-05
55	0.0351629	0.0493757	0.0273714	0.0233771	0.0260514	0.0420514	0.02609	0.0237229		55	0.0352	0.0392	0.0298	0.0267	0.0242	0.0321	0.0304	0.0183		0.0353	0.0392	0.0304	0.0272	0.0245	0.0314	0.0301	0.0191		-3.71429e-05	0.0101757	-0.00242857	-0.00332286	0.00185143	0.00995143	-0.00431	0.00542286		1.37959e-09	0.000103545	5.89796e-06	1.10414e-05	3.42779e-06	9.90309e-05	1.85761e-05	2.94074e-05
55.2	0.0345629	0.0498757	0.0247714	0.0248771	0.0241014	0.0391014	0.02459	0.0232729		55.2	0.0351	0.039	0.0296	0.0266	0.0241	0.0319	0.0301	0.0198		0.0351	0.039	0.0302	0.027	0.0244	0.0314	0.0299	0.0198		-0.000537143	0.0108757	-0.00482857	-0.00172286	1.42857e-06	0.00720143	-0.00551	0.00347286		2.88522e-07	0.000118281	2.33151e-05	2.96824e-06	2.04082e-12	5.18606e-05	3.03601e-05	1.20607e-05
55.4	0.0381129	0.0502757	0.0263214	0.0214771	0.0277014	0.0419014	0.02444	0.0215729		55.4	0.0349	0.0389	0.0295	0.0266	0.0241	0.0317	0.0298	0.021		0.035	0.0389	0.0301	0.0269	0.0243	0.0312	0.0296	0.0209		0.00321286	0.0113757	-0.00317857	-0.00512286	0.00360143	0.0102014	-0.00536	0.000572857		1.03225e-05	0.000129407	1.01033e-05	2.62437e-05	1.29703e-05	0.000104069	2.87296e-05	3.28165e-07
55.6	0.0345129	0.0487757	0.0258714	0.0209771	0.0238514	0.0382014	0.02379	0.0213229		55.6	0.0348	0.0388	0.0294	0.0265	0.024	0.0315	0.0297	0.0207		0.0348	0.0388	0.03	0.0268	0.0243	0.0311	0.0295	0.0191		-0.000287143	0.00997571	-0.00352857	-0.00552286	-0.000148571	0.00670143	-0.00591	0.000622857		8.2451e-08	9.95149e-05	1.24508e-05	3.0502e-05	2.20735e-08	4.49091e-05	3.49281e-05	3.87951e-07
55.8	0.0346129	0.0488257	0.0264714	0.0274271	0.0247014	0.0377014	0.02479	0.0238729		55.8	0.0346	0.0387	0.0294	0.0264	0.0239	0.0314	0.0298	0.0197		0.0347	0.0387	0.0299	0.0267	0.0242	0.031	0.0295	0.018		1.28571e-05	0.0101257	-0.00292857	0.00102714	0.000801429	0.00630143	-0.00501	0.00417286		1.65306e-10	0.00010253	8.57653e-06	1.05502e-06	6.42288e-07	3.9708e-05	2.51001e-05	1.74127e-05
56	0.0361629	0.0499257	0.0250714	0.0224771	0.0255014	0.0376014	0.02509	0.0222729		56	0.0345	0.0386	0.0294	0.0263	0.0238	0.0314	0.0299	0.0187		0.0346	0.0386	0.0299	0.0266	0.0241	0.0308	0.0295	0.0181		0.00166286	0.0113257	-0.00432857	-0.00382286	0.00170143	0.00620143	-0.00481	0.00357286		2.76509e-06	0.000128272	1.87365e-05	1.46142e-05	2.89486e-06	3.84577e-05	2.31361e-05	1.27653e-05
56.2	0.0347129	0.0469257	0.0248714	0.0220271	0.0233514	0.0440014	0.02489	0.0229229		56.2	0.0344	0.0385	0.0293	0.0261	0.0236	0.0313	0.0299	0.0186		0.0345	0.0385	0.0299	0.0265	0.024	0.0307	0.0295	0.0182		0.000312857	0.00842571	-0.00442857	-0.00407286	-0.000248571	0.0127014	-0.00501	0.00432286		9.78796e-08	7.09927e-05	1.96122e-05	1.65882e-05	6.17878e-08	0.000161326	2.51001e-05	1.86871e-05
56.4	0.0352629	0.0482757	0.0253714	0.0270771	0.0254014	0.0461014	0.02589	0.0243729		56.4	0.0344	0.0385	0.0292	0.026	0.0234	0.0312	0.0297	0.0197		0.0344	0.0384	0.0298	0.0264	0.0238	0.0307	0.0295	0.0199		0.000862857	0.00977571	-0.00382857	0.00107714	0.00200143	0.0149014	-0.00381	0.00467286		7.44522e-07	9.55646e-05	1.4658e-05	1.16024e-06	4.00572e-06	0.000222053	1.45161e-05	2.18356e-05
56.6	0.0352629	0.0475257	0.0258714	0.0223771	0.0262014	0.0339014	0.02584	0.0227729		56.6	0.0343	0.0384	0.0291	0.026	0.0233	0.0311	0.0294	0.0197		0.0343	0.0383	0.0298	0.0263	0.0237	0.0306	0.0293	0.0181		0.000962857	0.00912571	-0.00322857	-0.00362286	0.00290143	0.00280143	-0.00356	0.00307286		9.27094e-07	8.32787e-05	1.04237e-05	1.31251e-05	8.41829e-06	7.848e-06	1.26736e-05	9.44245e-06
56.8	0.0365629	0.0493257	0.0264714	0.0227271	0.0222014	0.0339014	0.02554	0.0238729		56.8	0.0342	0.0383	0.029	0.0259	0.0233	0.031	0.0291	0.0203		0.0343	0.0383	0.0297	0.0263	0.0235	0.0306	0.0291	0.017		0.00236286	0.0110257	-0.00252857	-0.00317286	-0.00109857	0.00290143	-0.00356	0.00357286		5.58309e-06	0.000121566	6.39367e-06	1.0067e-05	1.20686e-06	8.41829e-06	1.26736e-05	1.27653e-05
57	0.0361129	0.0466757	0.0265214	0.0216271	0.0271014	0.0390014	0.02414	0.0217229		57	0.0342	0.0382	0.0291	0.0259	0.0232	0.031	0.029	0.0193		0.0342	0.0382	0.0296	0.0262	0.0235	0.0305	0.0289	0.0182		0.00191286	0.00847571	-0.00257857	-0.00427286	0.00390143	0.00800143	-0.00486	0.00242286		3.65902e-06	7.18377e-05	6.64903e-06	1.82573e-05	1.52211e-05	6.40229e-05	2.36196e-05	5.87024e-06
57.2	0.0354629	0.0491757	0.0269214	0.0240271	0.0264514	0.0414014	0.02394	0.0214229		57.2	0.0341	0.0382	0.0291	0.0258	0.0232	0.031	0.029	0.0177		0.0341	0.0381	0.0296	0.0261	0.0234	0.0304	0.0287	0.0193		0.00136286	0.0109757	-0.00217857	-0.00177286	0.00325143	0.0104014	-0.00506	0.00372286		1.85738e-06	0.000120466	4.74617e-06	3.14302e-06	1.05718e-05	0.00010819	2.56036e-05	1.38597e-05
57.4	0.0354129	0.0490257	0.0277214	0.0221271	0.0235014	0.0403014	0.02399	0.0189729		57.4	0.0341	0.0381	0.0291	0.0256	0.023	0.0309	0.029	0.0177		0.0341	0.0381	0.0295	0.026	0.0234	0.0303	0.0286	0.0202		0.00131286	0.0109257	-0.00137857	-0.00347286	0.000501429	0.00940143	-0.00501	0.00127286		1.72359e-06	0.000119371	1.90046e-06	1.20607e-05	2.51431e-07	8.83869e-05	2.51001e-05	1.62017e-06
57.6	0.0355629	0.0503257	0.0275714	0.0240271	0.0252514	0.0378014	0.02429	0.0231729		57.6	0.034	0.038	0.029	0.0255	0.0229	0.0308	0.0289	0.0181		0.0341	0.038	0.0295	0.0259	0.0233	0.0302	0.0286	0.0196		0.00156286	0.0123257	-0.00142857	-0.00147286	0.00235143	0.00700143	-0.00461	0.00507286		2.44252e-06	0.000151923	2.04082e-06	2.16931e-06	5.52922e-06	4.902e-05	2.12521e-05	2.57339e-05
57.8	0.0341629	0.0471757	0.0265714	0.0204771	0.0244014	0.0367514	0.02434	0.0243229		57.8	0.034	0.038	0.0288	0.0254	0.0228	0.0306	0.0289	0.0192		0.034	0.0379	0.0294	0.0258	0.0232	0.0301	0.0286	0.0186		0.000162857	0.00917571	-0.00222857	-0.00492286	0.00160143	0.00615143	-0.00456	0.00512286		2.65224e-08	8.41937e-05	4.96653e-06	2.42345e-05	2.56457e-06	3.78401e-05	2.07936e-05	2.62437e-05
58	0.0364129	0.0491257	0.0268714	0.0256771	0.0235014	0.0365014	0.02129	0.0231729		58	0.0339	0.038	0.0287	0.0254	0.0228	0.0304	0.0287	0.0187		0.034	0.0379	0.0293	0.0258	0.0232	0.03	0.0286	0.019		0.00251286	0.0111257	-0.00182857	0.000277143	0.000701429	0.00610143	-0.00741	0.00447286		6.31445e-06	0.000123782	3.34367e-06	7.68082e-08	4.92002e-07	3.72274e-05	5.49081e-05	2.00065e-05
58.2	0.0359129	0.0501757	0.0256714	0.0204271	0.0249514	0.0351514	0.02509	0.0235729		58.2	0.0339	0.0381	0.0287	0.0254	0.0228	0.0304	0.0286	0.0182		0.034	0.0381	0.0292	0.0257	0.0231	0.0299	0.0286	0.0192		0.00201286	0.0120757	-0.00302857	-0.00497286	0.00215143	0.00475143	-0.00351	0.00537286		4.05159e-06	0.000145823	9.17224e-06	2.47293e-05	4.62864e-06	2.25761e-05	1.23201e-05	2.88676e-05
58.4	0.0375629	0.0484257	0.0267214	0.0239271	0.0285014	0.0382014	0.02439	0.0197229		58.4	0.034	0.0382	0.0287	0.0254	0.0228	0.0304	0.0286	0.0181		0.034	0.0382	0.0292	0.0257	0.023	0.0298	0.0285	0.0199		0.00356286	0.0102257	-0.00197857	-0.00147286	0.00570143	0.00780143	-0.00421	0.00162286		1.2694e-05	0.000104565	3.91474e-06	2.16931e-06	3.25063e-05	6.08623e-05	1.77241e-05	2.63367e-06
58.6	0.0356629	0.0499757	0.0280714	0.0197771	0.0264514	0.0393514	0.02254	0.0224729		58.6	0.034	0.0384	0.0288	0.0254	0.0227	0.0304	0.0286	0.0189		0.0341	0.0383	0.0292	0.0256	0.0229	0.0298	0.0284	0.0188		0.00166286	0.0115757	-0.000728571	-0.00562286	0.00375143	0.00895143	-0.00606	0.00357286		2.76509e-06	0.000133997	5.30816e-07	3.16165e-05	1.40732e-05	8.01281e-05	3.67236e-05	1.27653e-05
58.8	0.0368129	0.0533757	0.0255214	0.0253271	0.0241514	0.0389514	0.02669	0.0212229		58.8	0.0341	0.0385	0.0288	0.0253	0.0226	0.0304	0.0286	0.0194		0.0341	0.0385	0.0292	0.0256	0.0229	0.0298	0.0283	0.0175		0.00271286	0.0148757	-0.00327857	2.71429e-05	0.00155143	0.00855143	-0.00191	0.00182286		7.35959e-06	0.000221287	1.0749e-05	7.36735e-10	2.40693e-06	7.31269e-05	3.6481e-06	3.32281e-06
59	0.0350629	0.0514257	0.0269214	0.0189271	0.0252014	0.0330014	0.02174	0.0223729		59	0.0342	0.0386	0.0287	0.0252	0.0225	0.0304	0.0285	0.0199		0.0342	0.0386	0.0292	0.0255	0.0229	0.0298	0.0282	0.0178		0.000862857	0.0128257	-0.00177857	-0.00627286	0.00270143	0.00260143	-0.00676	0.00247286		7.44522e-07	0.000164499	3.16332e-06	3.93487e-05	7.29772e-06	6.76743e-06	4.56976e-05	6.11502e-06
59.2	0.0349629	0.0495757	0.0261714	0.0252771	0.0225014	0.0327014	0.02384	0.0219229		59.2	0.0342	0.0388	0.0287	0.0252	0.0225	0.0303	0.0285	0.0196		0.0343	0.0387	0.0292	0.0255	0.0229	0.0299	0.0281	0.0184		0.000762857	0.0107757	-0.00252857	7.71429e-05	1.42857e-06	0.00240143	-0.00466	0.00232286		5.81951e-07	0.000116116	6.39367e-06	5.95102e-09	2.04082e-12	5.76686e-06	2.17156e-05	5.39567e-06
59.4	0.0349129	0.0495257	0.0269714	0.0191771	0.0242514	0.0339514	0.02134	0.0233729		59.4	0.0344	0.039	0.0287	0.0252	0.0226	0.0303	0.0284	0.0189		0.0344	0.0389	0.0293	0.0255	0.0229	0.0298	0.0282	0.0187		0.000512857	0.0105257	-0.00172857	-0.00602286	0.00165143	0.00365143	-0.00706	0.00447286		2.63022e-07	0.000110791	2.98796e-06	3.62748e-05	2.72722e-06	1.33329e-05	4.98436e-05	2.00065e-05
59.6	0.0364129	0.0485757	0.0267714	0.0234271	0.0269514	0.0348514	0.02244	0.0230229		59.6	0.0345	0.0391	0.0288	0.0253	0.0227	0.0304	0.0285	0.0185		0.0345	0.039	0.0293	0.0256	0.0229	0.0298	0.0282	0.017		0.00191286	0.00947571	-0.00202857	-0.00187286	0.00425143	0.00445143	-0.00606	0.00452286		3.65902e-06	8.97892e-05	4.1151e-06	3.50759e-06	1.80746e-05	1.98152e-05	3.67236e-05	2.04562e-05
59.8	0.0360629	0.0492757	0.0264214	0.0221771	0.0282014	0.0353014	0.02169	0.0205229		59.8	0.0346	0.0391	0.0289	0.0253	0.0227	0.0305	0.0285	0.0182		0.0346	0.039	0.0293	0.0256	0.0229	0.0298	0.0282	0.0165		0.00146286	0.0101757	-0.00247857	-0.00312286	0.00550143	0.00480143	-0.00681	0.00232286		2.13995e-06	0.000103545	6.14332e-06	9.75224e-06	3.02657e-05	2.30537e-05	4.63761e-05	5.39567e-06
60	0.0375129	0.0492257	0.0269214	0.0230771	0.0260514	0.0408014	0.02539	0.0218729		60	0.0347	0.039	0.0289	0.0254	0.0227	0.0306	0.0286	0.0177		0.0346	0.0389	0.0293	0.0256	0.0229	0.0298	0.0282	0.0167		0.00281286	0.0102257	-0.00197857	-0.00232286	0.00335143	0.0102014	-0.00321	0.00417286		7.91217e-06	0.000104565	3.91474e-06	5.39567e-06	1.12321e-05	0.000104069	1.03041e-05	1.74127e-05
									PPMCC		0.942886	0.923071	0.962088	0.977032	0.956076	0.943042	0.979615	0.969343	PCC	0.944349	0.926816	0.968551	0.977096	0.967491	0.948826	0.982477	0.977014
[truncated: 5 more columns]

## Sheet: 2A_Aligned_RMSE(BR_10)
t	S3	S4	S5	S6	S7	S8	S9	S10		time	HEC_P3	HEC_P4	HEC_P5	HEC_P6	HEC_P7	HEC_P8	HEC_P9	HEC_P10			HEC_BR_10_P3	HEC_BR_10_P4	HEC_BR_10_P5	HEC_BR_10_P6	HEC_BR_10_P7	HEC_BR_10_P8	HEC_BR_10_P9	HEC_BR_10_P10		Error_3	Error_4	Error_5	Error_6	Error_7	Error_8	Error_9	Error_10		Error^2_3	Error^2_4	Error^2_5	Error^2_6	Error^2_7	Error^2_8	Error^2_9	Error^2_10		RMSE_3	RMSE_4
0	-3.71429e-05	-7.42857e-05	-0.000128571	7.71429e-05	1.42857e-06	5.14286e-05	-0.00011	2.28571e-05		0	0	0	0	0	0	0	0	0			0	0	0	0	0	0	0	0		-3.71429e-05	-7.42857e-05	-0.000128571	7.71429e-05	1.42857e-06	5.14286e-05	-0.00011	2.28571e-05		1.37959e-09	5.51837e-09	1.65306e-08	5.95102e-09	2.04082e-12	2.6449e-09	1.21e-08	5.22449e-10		0.803102	1.13332
0.2	-8.71429e-05	-2.42857e-05	-7.85714e-05	-0.000122857	0.000301429	1.42857e-06	-0.00021	7.28571e-05		0.2	0	0	0	0	0	0	0	0			0	0	0	0	0	0	0	0		-8.71429e-05	-2.42857e-05	-7.85714e-05	-0.000122857	0.000301429	1.42857e-06	-0.00021	7.28571e-05		7.59388e-09	5.89796e-10	6.17347e-09	1.50939e-08	9.08592e-08	2.04082e-12	4.41e-08	5.30816e-09
0.4	6.28571e-05	-2.42857e-05	7.14286e-05	2.71429e-05	-0.000148571	1.42857e-06	0.00019	-7.71429e-05		0.4	0	0	0	0	0	0	0	0			0	0	0	0	0	0	0	0		6.28571e-05	-2.42857e-05	7.14286e-05	2.71429e-05	-0.000148571	1.42857e-06	0.00019	-7.71429e-05		3.95102e-09	5.89796e-10	5.10204e-09	7.36735e-10	2.20735e-08	2.04082e-12	3.61e-08	5.95102e-09
0.6	-3.71429e-05	0.000275714	2.14286e-05	-2.28571e-05	0.000101429	-4.85714e-05	9e-05	0.000122857		0.6	0	0	0	0	0	0	0	0			0	0	0	0	0	0	0	0		-3.71429e-05	0.000275714	2.14286e-05	-2.28571e-05	0.000101429	-4.85714e-05	9e-05	0.000122857		1.37959e-09	7.60184e-08	4.59184e-10	5.22449e-10	1.02878e-08	2.35918e-09	8.1e-09	1.50939e-08
0.8	6.28571e-05	7.57143e-05	-7.85714e-05	-7.28571e-05	1.42857e-06	-0.000148571	-1e-05	2.28571e-05		0.8	0	0	0	0	0	0	0	0			0	0	0	0	0	0	0	0		6.28571e-05	7.57143e-05	-7.85714e-05	-7.28571e-05	1.42857e-06	-0.000148571	-1e-05	2.28571e-05		3.95102e-09	5.73265e-09	6.17347e-09	5.30816e-09	2.04082e-12	2.20735e-08	1e-10	5.22449e-10
1	-3.71429e-05	-0.000124286	-0.000178571	-2.28571e-05	1.42857e-06	-9.85714e-05	-1e-05	2.28571e-05		1	0	0	0	0	0	0	0	0			0	0	0	0	0	0	0	0		-3.71429e-05	-0.000124286	-0.000178571	-2.28571e-05	1.42857e-06	-9.85714e-05	-1e-05	2.28571e-05		1.37959e-09	1.54469e-08	3.18878e-08	5.22449e-10	2.04082e-12	9.71633e-09	1e-10	5.22449e-10
1.2	-3.71429e-05	0.000125714	7.14286e-05	-7.28571e-05	1.42857e-06	1.42857e-06	-6e-05	-2.71429e-05		1.2	0	0	0	0	0	0	0	0			0	0	0	0	0	0	0	0		-3.71429e-05	0.000125714	7.14286e-05	-7.28571e-05	1.42857e-06	1.42857e-06	-6e-05	-2.71429e-05		1.37959e-09	1.58041e-08	5.10204e-09	5.30816e-09	2.04082e-12	2.04082e-12	3.6e-09	7.36735e-10
1.4	6.28571e-05	2.57143e-05	0.000121429	2.71429e-05	5.14286e-05	0.000251429	-0.00026	0.000222857		1.4	0	0	0	0	0	0	0	0			0	0	0	0	0	0	0	0		6.28571e-05	2.57143e-05	0.000121429	2.71429e-05	5.14286e-05	0.000251429	-0.00026	0.000222857		3.95102e-09	6.61224e-10	1.47449e-08	7.36735e-10	2.6449e-09	6.32163e-08	6.76e-08	4.96653e-08
1.6	-3.71429e-05	7.57143e-05	-7.85714e-05	2.71429e-05	5.14286e-05	-0.000148571	0.00024	-7.71429e-05		1.6	0	0	0	0	0	0	0	0			0	0	0	0	0	0	0	0		-3.71429e-05	7.57143e-05	-7.85714e-05	2.71429e-05	5.14286e-05	-0.000148571	0.00024	-7.71429e-05		1.37959e-09	5.73265e-09	6.17347e-09	7.36735e-10	2.6449e-09	2.20735e-08	5.76e-08	5.95102e-09
1.8	1.28571e-05	2.57143e-05	-2.85714e-05	2.71429e-05	-0.000248571	1.42857e-06	4e-05	-7.71429e-05		1.8	0	0	0	0	0	0	0	0			0	0	0	0	0	0	0	0		1.28571e-05	2.57143e-05	-2.85714e-05	2.71429e-05	-0.000248571	1.42857e-06	4e-05	-7.71429e-05		1.65306e-10	6.61224e-10	8.16327e-10	7.36735e-10	6.17878e-08	2.04082e-12	1.6e-09	5.95102e-09
2	6.28571e-05	2.57143e-05	-7.85714e-05	0.000327143	1.42857e-06	0.000151429	-0.00016	-0.000127143		2	0	0	0	0	0	0	0	0			0	0	0	0	0	0	0	0		6.28571e-05	2.57143e-05	-7.85714e-05	0.000327143	1.42857e-06	0.000151429	-0.00016	-0.000127143		3.95102e-09	6.61224e-10	6.17347e-09	1.07022e-07	2.04082e-12	2.29306e-08	2.56e-08	1.61653e-08
2.2	-8.71429e-05	-0.000124286	2.14286e-05	2.71429e-05	5.14286e-05	-0.000248571	-0.00011	0.000172857		2.2	0	0	0	0	0	0	0	0			0	0	0	0	0	0	0	0		-8.71429e-05	-0.000124286	2.14286e-05	2.71429e-05	5.14286e-05	-0.000248571	-0.00011	0.000172857		7.59388e-09	1.54469e-08	4.59184e-10	7.36735e-10	2.6449e-09	6.17878e-08	1.21e-08	2.98796e-08
2.4	1.28571e-05	-2.42857e-05	0.000121429	-2.28571e-05	0.000201429	0.000251429	-0.00011	-7.71429e-05		2.4	0	0	0	0	0	0	0	0			0	0	0	0	0	0	0	0		1.28571e-05	-2.42857e-05	0.000121429	-2.28571e-05	0.000201429	0.000251429	-0.00011	-7.71429e-05		1.65306e-10	5.89796e-10	1.47449e-08	5.22449e-10	4.05735e-08	6.32163e-08	1.21e-08	5.95102e-09
2.6	1.28571e-05	7.57143e-05	-2.85714e-05	0.000327143	-0.000148571	0.000201429	-0.00021	-7.71429e-05		2.6	0	0	0	0	0	0	0	0			0	0	0	0	0	0	0	0		1.28571e-05	7.57143e-05	-2.85714e-05	0.000327143	-0.000148571	0.000201429	-0.00021	-7.71429e-05		1.65306e-10	5.73265e-09	8.16327e-10	1.07022e-07	2.20735e-08	4.05735e-08	4.41e-08	5.95102e-09
2.8	6.28571e-05	7.57143e-05	2.14286e-05	-7.28571e-05	-0.000148571	-0.000148571	0.00019	-2.71429e-05		2.8	0	0	0	0	0	0	0	0			0	0	0	0	0	0	0	0		6.28571e-05	7.57143e-05	2.14286e-05	-7.28571e-05	-0.000148571	-0.000148571	0.00019	-2.71429e-05		3.95102e-09	5.73265e-09	4.59184e-10	5.30816e-09	2.20735e-08	2.20735e-08	3.61e-08	7.36735e-10
3	0.000162857	-0.000124286	-2.85714e-05	-0.000122857	1.42857e-06	-4.85714e-05	0.00014	-2.71429e-05		3	0	0	0	0	0	0	0	0			0	0	0	0	0	0	0	0		0.000162857	-0.000124286	-2.85714e-05	-0.000122857	1.42857e-06	-4.85714e-05	0.00014	-2.71429e-05		2.65224e-08	1.54469e-08	8.16327e-10	1.50939e-08	2.04082e-12	2.35918e-09	1.96e-08	7.36735e-10
3.2	-8.71429e-05	0.000225714	2.14286e-05	7.71429e-05	0.000151429	1.42857e-06	4e-05	-7.71429e-05		3.2	0	0	0	0	0	0	0	0			0	0	0	0	0	0	0	0		-8.71429e-05	0.000225714	2.14286e-05	7.71429e-05	0.000151429	1.42857e-06	4e-05	-7.71429e-05		7.59388e-09	5.09469e-08	4.59184e-10	5.95102e-09	2.29306e-08	2.04082e-12	1.6e-09	5.95102e-09
3.4	-8.71429e-05	-2.42857e-05	-7.85714e-05	-2.28571e-05	-9.85714e-05	-9.85714e-05	0.00019	-2.71429e-05		3.4	0	0	0	0	0	0	0	0			0	0	0	0	0	0	0	0		-8.71429e-05	-2.42857e-05	-7.85714e-05	-2.28571e-05	-9.85714e-05	-9.85714e-05	0.00019	-2.71429e-05		7.59388e-09	5.89796e-10	6.17347e-09	5.22449e-10	9.71633e-09	9.71633e-09	3.61e-08	7.36735e-10
3.6	-8.71429e-05	2.57143e-05	-7.85714e-05	-0.000172857	-4.85714e-05	5.14286e-05	-1e-05	0.000172857		3.6	0	0	0	0	0	0	0	0			0	0	0	0	0	0	0	0		-8.71429e-05	2.57143e-05	-7.85714e-05	-0.000172857	-4.85714e-05	5.14286e-05	-1e-05	0.000172857		7.59388e-09	6.61224e-10	6.17347e-09	2.98796e-08	2.35918e-09	2.6449e-09	1e-10	2.98796e-08
3.8	1.28571e-05	-7.42857e-05	2.14286e-05	0.000127143	5.14286e-05	-4.85714e-05	-0.00011	-2.71429e-05		3.8	0	0	0	0	0	0	0	0			0	0	0	0	0	0	0	0		1.28571e-05	-7.42857e-05	2.14286e-05	0.000127143	5.14286e-05	-4.85714e-05	-0.00011	-2.71429e-05		1.65306e-10	5.51837e-09	4.59184e-10	1.61653e-08	2.6449e-09	2.35918e-09	1.21e-08	7.36735e-10
4	0.000312857	7.57143e-05	0.000271429	-7.28571e-05	-9.85714e-05	-0.000248571	9e-05	-2.71429e-05		4	0	0	0	0	0	0	0	0			0	0	0	0	0	0	0	0		0.000312857	7.57143e-05	0.000271429	-7.28571e-05	-9.85714e-05	-0.000248571	9e-05	-2.71429e-05		9.78796e-08	5.73265e-09	7.36735e-08	5.30816e-09	9.71633e-09	6.17878e-08	8.1e-09	7.36735e-10
4.2	-8.71429e-05	7.57143e-05	2.14286e-05	-7.28571e-05	-4.85714e-05	-9.85714e-05	0.00014	-0.000127143		4.2	0	0	0	0	0	0	0	0			0	0	0	0	0	0	0	0		-8.71429e-05	7.57143e-05	2.14286e-05	-7.28571e-05	-4.85714e-05	-9.85714e-05	0.00014	-0.000127143		7.59388e-09	5.73265e-09	4.59184e-10	5.30816e-09	2.35918e-09	9.71633e-09	1.96e-08	1.61653e-08
4.4	-3.71429e-05	-0.000174286	2.14286e-05	-2.28571e-05	-4.85714e-05	-4.85714e-05	-1e-05	0.000122857		4.4	0	0	0	0	0	0	0	0			0	0	0	0	0	0	0	0		-3.71429e-05	-0.000174286	2.14286e-05	-2.28571e-05	-4.85714e-05	-4.85714e-05	-1e-05	0.000122857		1.37959e-09	3.03755e-08	4.59184e-10	5.22449e-10	2.35918e-09	2.35918e-09	1e-10	1.50939e-08
4.6	-8.71429e-05	2.57143e-05	-7.85714e-05	-2.28571e-05	1.42857e-06	-4.85714e-05	-1e-05	-2.71429e-05		4.6	0	0	0	0	0	0	0	0			0	0	0	0	0	0	0	0		-8.71429e-05	2.57143e-05	-7.85714e-05	-2.28571e-05	1.42857e-06	-4.85714e-05	-1e-05	-2.71429e-05		7.59388e-09	6.61224e-10	6.17347e-09	5.22449e-10	2.04082e-12	2.35918e-09	1e-10	7.36735e-10
4.8	1.28571e-05	-2.42857e-05	-2.85714e-05	-0.000222857	-0.000148571	-4.85714e-05	9e-05	-7.71429e-05		4.8	0	0	0	0	0	0	0	0			0	0	0	0	0	0	0	0		1.28571e-05	-2.42857e-05	-2.85714e-05	-0.000222857	-0.000148571	-4.85714e-05	9e-05	-7.71429e-05		1.65306e-10	5.89796e-10	8.16327e-10	4.96653e-08	2.20735e-08	2.35918e-09	8.1e-09	5.95102e-09
5	0.000412857	-2.42857e-05	0.000121429	7.71429e-05	1.42857e-06	5.14286e-05	-6e-05	-0.000177143		5	0	0	0	0	0	0	0	0			0	0	0	0	0	0	0	0		0.000412857	-2.42857e-05	0.000121429	7.71429e-05	1.42857e-06	5.14286e-05	-6e-05	-0.000177143		1.70451e-07	5.89796e-10	1.47449e-08	5.95102e-09	2.04082e-12	2.6449e-09	3.6e-09	3.13796e-08
5.2	-0.000137143	7.57143e-05	-0.000128571	2.71429e-05	1.42857e-06	0.000201429	-6e-05	7.28571e-05		5.2	0	0	0	0	0	0	0	0			0	0	0	0	0	0	0	0		-0.000137143	7.57143e-05	-0.000128571	2.71429e-05	1.42857e-06	0.000201429	-6e-05	7.28571e-05		1.88082e-08	5.73265e-09	1.65306e-08	7.36735e-10	2.04082e-12	4.05735e-08	3.6e-09	5.30816e-09
5.4	-3.71429e-05	-7.42857e-05	-2.85714e-05	-0.000122857	0.000351429	-9.85714e-05	0.00014	2.28571e-05		5.4	0	0	0	0	0	0	0	0			0	0	0	0	0	0	0	0		-3.71429e-05	-7.42857e-05	-2.85714e-05	-0.000122857	0.000351429	-9.85714e-05	0.00014	2.28571e-05		1.37959e-09	5.51837e-09	8.16327e-10	1.50939e-08	1.23502e-07	9.71633e-09	1.96e-08	5.22449e-10
5.6	-8.71429e-05	-0.000124286	-7.85714e-05	2.71429e-05	-0.000198571	1.42857e-06	4e-05	-0.000127143		5.6	0	0	0	0	0	0	0	0			0	0	0	0	0	0	0	0		-8.71429e-05	-0.000124286	-7.85714e-05	2.71429e-05	-0.000198571	1.42857e-06	4e-05	-0.000127143		7.59388e-09	1.54469e-08	6.17347e-09	7.36735e-10	3.94306e-08	2.04082e-12	1.6e-09	1.61653e-08
5.8	-3.71429e-05	-0.000124286	-2.85714e-05	2.71429e-05	5.14286e-05	0.000301429	-6e-05	0.000272857		5.8	0	0	0	0	0	0	0	0			0	0	0	0	0	0	0	0		-3.71429e-05	-0.000124286	-2.85714e-05	2.71429e-05	5.14286e-05	0.000301429	-6e-05	0.000272857		1.37959e-09	1.54469e-08	8.16327e-10	7.36735e-10	2.6449e-09	9.08592e-08	3.6e-09	7.4451e-08
6	0.000162857	2.57143e-05	0.000121429	0.000177143	1.42857e-06	1.42857e-06	4e-05	7.28571e-05		6	0	0	0	0	0	0	0	0			0	0	0	0	0	0	0	0		0.000162857	2.57143e-05	0.000121429	0.000177143	1.42857e-06	1.42857e-06	4e-05	7.28571e-05		2.65224e-08	6.61224e-10	1.47449e-08	3.13796e-08	2.04082e-12	2.04082e-12	1.6e-09	5.30816e-09
6.2	-0.000187143	7.57143e-05	-0.000128571	-2.28571e-05	1.42857e-06	1.42857e-06	-0.00011	2.28571e-05		6.2	0	0	0	0	0	0	0	0			0	0	0	0	0	0	0	0		-0.000187143	7.57143e-05	-0.000128571	-2.28571e-05	1.42857e-06	1.42857e-06	-0.00011	2.28571e-05		3.50224e-08	5.73265e-09	1.65306e-08	5.22449e-10	2.04082e-12	2.04082e-12	1.21e-08	5.22449e-10
6.4	-8.71429e-05	-0.000174286	2.14286e-05	-0.000172857	-9.85714e-05	0.000151429	-0.00016	-0.000227143		6.4	0	0	0	0	0	0	0	0			0	0	0	0	0	0	0	0		-8.71429e-05	-0.000174286	2.14286e-05	-0.000172857	-9.85714e-05	0.000151429	-0.00016	-0.000227143		7.59388e-09	3.03755e-08	4.59184e-10	2.98796e-08	9.71633e-09	2.29306e-08	2.56e-08	5.15939e-08
6.6	-3.71429e-05	2.57143e-05	0.000421429	7.71429e-05	1.42857e-06	-0.000148571	0.00014	0.000122857		6.6	0	0	0	0	0	0	0	0			0	0	0	0	0	0	0	0		-3.71429e-05	2.57143e-05	0.000421429	7.71429e-05	1.42857e-06	-0.000148571	0.00014	0.000122857		1.37959e-09	6.61224e-10	1.77602e-07	5.95102e-09	2.04082e-12	2.20735e-08	1.96e-08	1.50939e-08
6.8	1.28571e-05	-7.42857e-05	-0.000128571	-2.28571e-05	0.000101429	0.000101429	4e-05	-2.71429e-05		6.8	0	0	0	0	0	0	0	0			0	0	0	0	0	0	0	0		1.28571e-05	-7.42857e-05	-0.000128571	-2.28571e-05	0.000101429	0.000101429	4e-05	-2.71429e-05		1.65306e-10	5.51837e-09	1.65306e-08	5.22449e-10	1.02878e-08	1.02878e-08	1.6e-09	7.36735e-10
7	0.000112857	-0.000124286	-2.85714e-05	-0.000122857	-0.000198571	0.000101429	9e-05	-7.71429e-05		7	0	0	0	0	0	0	0	0			0	0	0	0	0	0	0	0		0.000112857	-0.000124286	-2.85714e-05	-0.000122857	-0.000198571	0.000101429	9e-05	-7.71429e-05		1.27367e-08	1.54469e-08	8.16327e-10	1.50939e-08	3.94306e-08	1.02878e-08	8.1e-09	5.95102e-09
7.2	-0.000187143	7.57143e-05	-0.000178571	0.000127143	-4.85714e-05	-0.000148571	-1e-05	-0.000227143		7.2	0	0	0	0	0	0	0	0			0	0	0	0	0	0	0	0		-0.000187143	7.57143e-05	-0.000178571	0.000127143	-4.85714e-05	-0.000148571	-1e-05	-0.000227143		3.50224e-08	5.73265e-09	3.18878e-08	1.61653e-08	2.35918e-09	2.20735e-08	1e-10	5.15939e-08
7.4	-8.71429e-05	-0.000124286	-2.85714e-05	-7.28571e-05	1.42857e-06	5.14286e-05	-0.00011	7.28571e-05		7.4	0	0	0	0	0	0	0	0			0	0	0	0	0	0	0	0		-8.71429e-05	-0.000124286	-2.85714e-05	-7.28571e-05	1.42857e-06	5.14286e-05	-0.00011	7.28571e-05		7.59388e-09	1.54469e-08	8.16327e-10	5.30816e-09	2.04082e-12	2.6449e-09	1.21e-08	5.30816e-09
7.6	-3.71429e-05	-7.42857e-05	0.000121429	-0.000172857	5.14286e-05	0.000201429	-0.00011	-0.000127143		7.6	0	0	0	0	0	0	0	0			0	0	0	0	0	0	0	0		-3.71429e-05	-7.42857e-05	0.000121429	-0.000172857	5.14286e-05	0.000201429	-0.00011	-0.000127143		1.37959e-09	5.51837e-09	1.47449e-08	2.98796e-08	2.6449e-09	4.05735e-08	1.21e-08	1.61653e-08
7.8	1.28571e-05	-0.000224286	-2.85714e-05	-2.28571e-05	-0.000148571	-4.85714e-05	9e-05	-7.71429e-05		7.8	0	0	0	0	0	0	0	0			0	0	0	0	0	0	0	0		1.28571e-05	-0.000224286	-2.85714e-05	-2.28571e-05	-0.000148571	-4.85714e-05	9e-05	-7.71429e-05		1.65306e-10	5.03041e-08	8.16327e-10	5.22449e-10	2.20735e-08	2.35918e-09	8.1e-09	5.95102e-09
8	0.000162857	2.57143e-05	2.14286e-05	2.71429e-05	1.42857e-06	5.14286e-05	-1e-05	-7.71429e-05		8	0	0	0	0	0	0	0	0			0	0	0	0	0	0	0	0		0.000162857	2.57143e-05	2.14286e-05	2.71429e-05	1.42857e-06	5.14286e-05	-1e-05	-7.71429e-05		2.65224e-08	6.61224e-10	4.59184e-10	7.36735e-10	2.04082e-12	2.6449e-09	1e-10	5.95102e-09
8.2	-0.000187143	-2.42857e-05	-7.85714e-05	-0.000122857	1.42857e-06	5.14286e-05	-6e-05	7.28571e-05		8.2	0	0	0	0	0	0	0	0			0	0	0	0	0	0	0	0		-0.000187143	-2.42857e-05	-7.85714e-05	-0.000122857	1.42857e-06	5.14286e-05	-6e-05	7.28571e-05		3.50224e-08	5.89796e-10	6.17347e-09	1.50939e-08	2.04082e-12	2.6449e-09	3.6e-09	5.30816e-09
8.4	-3.71429e-05	-0.000174286	2.14286e-05	7.71429e-05	0.000251429	-0.000148571	-1e-05	-0.000127143		8.4	0	0	0	0	0	0	0	0			0	0	0	0	0	0	0	0		-3.71429e-05	-0.000174286	2.14286e-05	7.71429e-05	0.000251429	-0.000148571	-1e-05	-0.000127143		1.37959e-09	3.03755e-08	4.59184e-10	5.95102e-09	6.32163e-08	2.20735e-08	1e-10	1.61653e-08
8.6	1.28571e-05	-2.42857e-05	7.14286e-05	-0.000122857	-0.000148571	0.000151429	-0.00011	-0.000127143		8.6	0	0	0	0	0	0	0	0			0	0	0	0	0	0	0	0		1.28571e-05	-2.42857e-05	7.14286e-05	-0.000122857	-0.000148571	0.000151429	-0.00011	-0.000127143		1.65306e-10	5.89796e-10	5.10204e-09	1.50939e-08	2.20735e-08	2.29306e-08	1.21e-08	1.61653e-08
8.8	-3.71429e-05	-0.000124286	-0.000128571	-0.000222857	5.14286e-05	5.14286e-05	-0.00016	0.000172857		8.8	0	0	0	0	0	0	0	0			0	0	0	0	0	0	0	0		-3.71429e-05	-0.000124286	-0.000128571	-0.000222857	5.14286e-05	5.14286e-05	-0.00016	0.000172857		1.37959e-09	1.54469e-08	1.65306e-08	4.96653e-08	2.6449e-09	2.6449e-09	2.56e-08	2.98796e-08
9	0.000112857	-0.000124286	-0.000128571	2.71429e-05	5.14286e-05	5.14286e-05	0.00014	-2.71429e-05		9	0	0	0	0	0	0	0	0			0	0	0	0	0	0	0	0		0.000112857	-0.000124286	-0.000128571	2.71429e-05	5.14286e-05	5.14286e-05	0.00014	-2.71429e-05		1.27367e-08	1.54469e-08	1.65306e-08	7.36735e-10	2.6449e-09	2.6449e-09	1.96e-08	7.36735e-10
9.2	-0.000187143	0.000225714	0.000221429	2.71429e-05	-4.85714e-05	5.14286e-05	-1e-05	-7.71429e-05		9.2	0	0	0	0	0	0	0	0			0	0	0	0	0	0	0	0		-0.000187143	0.000225714	0.000221429	2.71429e-05	-4.85714e-05	5.14286e-05	-1e-05	-7.71429e-05		3.50224e-08	5.09469e-08	4.90306e-08	7.36735e-10	2.35918e-09	2.6449e-09	1e-10	5.95102e-09
9.4	-0.000137143	-7.42857e-05	-7.85714e-05	-0.000172857	-9.85714e-05	0.000101429	-6e-05	-0.000177143		9.4	0	0	0	0	0	0	0	0			0	0	0	0	0	0	0	0		-0.000137143	-7.42857e-05	-7.85714e-05	-0.000172857	-9.85714e-05	0.000101429	-6e-05	-0.000177143		1.88082e-08	5.51837e-09	6.17347e-09	2.98796e-08	9.71633e-09	1.02878e-08	3.6e-09	3.13796e-08
9.6	-3.71429e-05	-7.42857e-05	7.14286e-05	-7.28571e-05	-4.85714e-05	0.000401429	4e-05	0.000122857		9.6	0	0	0	0	0	0	0	0			0	0	0	0	0	0	0	0		-3.71429e-05	-7.42857e-05	7.14286e-05	-7.28571e-05	-4.85714e-05	0.000401429	4e-05	0.000122857		1.37959e-09	5.51837e-09	5.10204e-09	5.30816e-09	2.35918e-09	1.61145e-07	1.6e-09	1.50939e-08
9.8	1.28571e-05	-0.000274286	-0.000228571	-0.000172857	5.14286e-05	1.42857e-06	-0.00011	-7.71429e-05		9.8	0	0	0	0	0	0	0	0			0	0	0	0	0	0	0	0		1.28571e-05	-0.000274286	-0.000228571	-0.000172857	5.14286e-05	1.42857e-06	-0.00011	-7.71429e-05		1.65306e-10	7.52327e-08	5.22449e-08	2.98796e-08	2.6449e-09	2.04082e-12	1.21e-08	5.95102e-09
10	0.000112857	-2.42857e-05	2.14286e-05	-7.28571e-05	-0.000148571	5.14286e-05	-0.00016	-7.71429e-05		10	0	0	0	0	0	0	0	0			0	0	0	0	0	0	0	0		0.000112857	-2.42857e-05	2.14286e-05	-7.28571e-05	-0.000148571	5.14286e-05	-0.00016	-7.71429e-05		1.27367e-08	5.89796e-10	4.59184e-10	5.30816e-09	2.20735e-08	2.6449e-09	2.56e-08	5.95102e-09
10.2	-0.000187143	-0.000174286	0.000121429	-7.28571e-05	-9.85714e-05	0.000201429	0.00029	-0.000177143		10.2	0	0	0	0	0	0	0	0			0	0	0	0	0	0	0	0		-0.000187143	-0.000174286	0.000121429	-7.28571e-05	-9.85714e-05	0.000201429	0.00029	-0.000177143		3.50224e-08	3.03755e-08	1.47449e-08	5.30816e-09	9.71633e-09	4.05735e-08	8.41e-08	3.13796e-08
10.4	-8.71429e-05	-0.000224286	-2.85714e-05	-7.28571e-05	1.42857e-06	-0.000148571	4e-05	7.28571e-05		10.4	0	0	0	0	0	0	0	0			0	0	0	0	0	0	0	0		-8.71429e-05	-0.000224286	-2.85714e-05	-7.28571e-05	1.42857e-06	-0.000148571	4e-05	7.28571e-05		7.59388e-09	5.03041e-08	8.16327e-10	5.30816e-09	2.04082e-12	2.20735e-08	1.6e-09	5.30816e-09
10.6	-0.000187143	-2.42857e-05	2.14286e-05	0.000277143	5.14286e-05	5.14286e-05	-6e-05	-2.71429e-05		10.6	0	0	0	0	0	0	0	0			0	0	0	0	0	0	0	0		-0.000187143	-2.42857e-05	2.14286e-05	0.000277143	5.14286e-05	5.14286e-05	-6e-05	-2.71429e-05		3.50224e-08	5.89796e-10	4.59184e-10	7.68082e-08	2.6449e-09	2.6449e-09	3.6e-09	7.36735e-10
10.8	-8.71429e-05	-0.000174286	-7.85714e-05	-7.28571e-05	-0.000148571	5.14286e-05	-0.00011	-7.71429e-05		10.8	0	0	0	0	0	0	0	0			0	0	0	0	0	0	0	0		-8.71429e-05	-0.000174286	-7.85714e-05	-7.28571e-05	-0.000148571	5.14286e-05	-0.00011	-7.71429e-05		7.59388e-09	3.03755e-08	6.17347e-09	5.30816e-09	2.20735e-08	2.6449e-09	1.21e-08	5.95102e-09
11	6.28571e-05	-0.000174286	2.14286e-05	-0.000172857	-0.000148571	-9.85714e-05	-0.00011	0.000172857		11	0	0	0	0	0	0	0	0			0	0	0	0	0	0	0	0		6.28571e-05	-0.000174286	2.14286e-05	-0.000172857	-0.000148571	-9.85714e-05	-0.00011	0.000172857		3.95102e-09	3.03755e-08	4.59184e-10	2.98796e-08	2.20735e-08	9.71633e-09	1.21e-08	2.98796e-08
11.2	-0.000187143	2.57143e-05	2.14286e-05	7.71429e-05	-4.85714e-05	0.000151429	-0.00021	-2.71429e-05		11.2	0	0	0	0	0	0	0	0			0	0	0	0	0	0	0	0		-0.000187143	2.57143e-05	2.14286e-05	7.71429e-05	-4.85714e-05	0.000151429	-0.00021	-2.71429e-05		3.50224e-08	6.61224e-10	4.59184e-10	5.95102e-09	2.35918e-09	2.29306e-08	4.41e-08	7.36735e-10
11.4	-0.000137143	-0.000124286	-0.000128571	-2.28571e-05	0.000201429	0.000201429	9e-05	-2.71429e-05		11.4	0	0	0	0	0	0	0	0			0	0	0	0	0	0	0	0		-0.000137143	-0.000124286	-0.000128571	-2.28571e-05	0.000201429	0.000201429	9e-05	-2.71429e-05		1.88082e-08	1.54469e-08	1.65306e-08	5.22449e-10	4.05735e-08	4.05735e-08	8.1e-09	7.36735e-10
11.6	-3.71429e-05	-7.42857e-05	2.14286e-05	-2.28571e-05	-0.000148571	-0.000198571	4e-05	-0.000127143		11.6	0	0	0	0	0	0	0	0			0	0	0	0	0	0	0	0		-3.71429e-05	-7.42857e-05	2.14286e-05	-2.28571e-05	-0.000148571	-0.000198571	4e-05	-0.000127143		1.37959e-09	5.51837e-09	4.59184e-10	5.22449e-10	2.20735e-08	3.94306e-08	1.6e-09	1.61653e-08
11.8	-8.71429e-05	-0.000174286	0.000171429	0.000127143	5.14286e-05	-4.85714e-05	-6e-05	7.28571e-05		11.8	0	0	0	0	0	0	0	0			0	0	0	0	0	0	0	0		-8.71429e-05	-0.000174286	0.000171429	0.000127143	5.14286e-05	-4.85714e-05	-6e-05	7.28571e-05		7.59388e-09	3.03755e-08	2.93878e-08	1.61653e-08	2.6449e-09	2.35918e-09	3.6e-09	5.30816e-09
12	0.00181286	0.0145757	-2.85714e-05	-0.000122857	1.42857e-06	0.000101429	-1e-05	-7.71429e-05		12	0	0	0	0	0	0	0	0			0	0	0	0	0	0	0	0		0.00181286	0.0145757	-2.85714e-05	-0.000122857	1.42857e-06	0.000101429	-1e-05	-7.71429e-05		3.28645e-06	0.000212451	8.16327e-10	1.50939e-08	2.04082e-12	1.02878e-08	1e-10	5.95102e-09
12.2	0.0119629	0.0149757	2.14286e-05	-0.000172857	-4.85714e-05	-4.85714e-05	-6e-05	-2.71429e-05		12.2	0	0.0302	0	0	0	0	0	0			0	0.0302	0	0	0	0	0	0		0.0119629	-0.0152243	2.14286e-05	-0.000172857	-4.85714e-05	-4.85714e-05	-6e-05	-2.71429e-05		0.00014311	0.000231779	4.59184e-10	2.98796e-08	2.35918e-09	2.35918e-09	3.6e-09	7.36735e-10
12.4	0.0120129	0.0183757	0.0126714	2.71429e-05	-9.85714e-05	1.42857e-06	-0.00016	-0.000127143		12.4	0.0331	0.0775	0	0	0	0	0	0			0.0331	0.0699	0	0	0	0	0	0		-0.0210871	-0.0515243	0.0126714	2.71429e-05	-9.85714e-05	1.42857e-06	-0.00016	-0.000127143		0.000444668	0.00265475	0.000160565	7.36735e-10	9.71633e-09	2.04082e-12	2.56e-08	1.61653e-08
12.6	0.0138129	0.0233257	0.0212714	-2.28571e-05	1.42857e-06	1.42857e-06	-0.00011	0.000172857		12.6	0.0331	0.0824	0.0423	0	0	0	0	0			0.0335	0.0777	0.0405	0	0	0	0	0		-0.0196871	-0.0543743	-0.0192286	-2.28571e-05	1.42857e-06	1.42857e-06	-0.00011	0.000172857		0.000387584	0.00295656	0.000369738	5.22449e-10	2.04082e-12	2.04082e-12	1.21e-08	2.98796e-08
12.8	0.0157129	0.0307757	0.0209714	0.000477143	1.42857e-06	-0.000148571	-1e-05	-2.71429e-05		12.8	0.0585	0.0768	0.0336	0	0	0	0	0			0.0587	0.0776	0.0344	0	0	0	0	0		-0.0429871	-0.0468243	-0.0134286	0.000477143	1.42857e-06	-0.000148571	-1e-05	-2.71429e-05		0.00184789	0.00219251	0.000180327	2.27665e-07	2.04082e-12	2.20735e-08	1e-10	7.36735e-10
13	0.0180129	0.0427757	0.0203214	0.00172714	0.00270143	0.0158514	-6e-05	-7.71429e-05		13	0.0631	0.0775	0.0328	0	0	0	0	0			0.0626	0.0777	0.033	0	0	0	0	0		-0.0445871	-0.0349243	-0.0126786	0.00172714	0.00270143	0.0158514	-6e-05	-7.71429e-05		0.00198801	0.00121971	0.000160746	2.98302e-06	7.29772e-06	0.000251268	3.6e-09	5.95102e-09
13.2	0.0205129	0.0415257	0.0204214	0.00387714	0.0107014	0.0179514	-1e-05	-0.000227143		13.2	0.0695	0.0834	0.0353	0.0158	0	0	0	0			0.0678	0.084	0.0351	0.0169	0	0	0	0		-0.0472871	-0.0424743	-0.0146786	-0.0130229	0.0107014	0.0179514	-1e-05	-0.000227143		0.00223607	0.00180406	0.00021546	0.000169595	0.000114521	0.000322254	1e-10	5.15939e-08
13.4	0.0219629	0.0423757	0.0232214	0.0100771	0.00880143	0.0181514	0.00174	2.28571e-05		13.4	0.0713	0.0863	0.0394	0.0061	0	0.0389	0	0			0.0712	0.0842	0.0382	0.0059	0	0.0385	0	0		-0.0492371	-0.0418243	-0.0149786	0.00417714	0.00880143	-0.0203486	0.00174	2.28571e-05		0.0024243	0.00174927	0.000224358	1.74485e-05	7.74651e-05	0.000414064	3.0276e-06	5.22449e-10
13.6	0.0294129	0.0411257	0.0261214	0.0127771	0.0109514	0.0198514	0.00724	-7.71429e-05		13.6	0.0737	0.0883	0.0479	0.035	0.0303	0.0385	0	0			0.0727	0.0874	0.045	0.0371	0.0151	0.0355	0	0		-0.0432871	-0.0462743	-0.0188786	-0.0243229	-0.00414857	-0.0156486	0.00724	-7.71429e-05		0.00187378	0.00214131	0.0003564	0.000591601	1.72106e-05	0.000244878	5.24176e-05	5.95102e-09
13.8	0.0361129	0.0456257	0.0281214	0.0184771	0.0135514	0.0186514	0.01529	0.00312286		13.8	0.0759	0.088	0.0499	0.0351	0.027	0.0445	0.0079	0			0.0756	0.0873	0.0494	0.0339	0.0251	0.0411	0.0096	0		-0.0394871	-0.0416743	-0.0212786	-0.0154229	-0.0115486	-0.0224486	0.00569	0.00312286		0.00155923	0.00173675	0.000452778	0.000237865	0.00013337	0.000503938	3.23761e-05	9.75224e-06
14	0.0414129	0.0468757	0.0297714	0.0158271	0.0144014	0.0226514	0.01809	0.0134229		14	0.0788	0.0876	0.0467	0.0325	0.0314	0.0496	0.0073	0			0.0777	0.0868	0.047	0.0328	0.0306	0.0487	0.0066	0		-0.0362871	-0.0399243	-0.0172286	-0.0169729	-0.0161986	-0.0260486	0.01149	0.0134229		0.00131676	0.00159395	0.000296824	0.000288078	0.000262394	0.000678528	0.00013202	0.000180173
14.2	0.0452629	0.0526257	0.0318714	0.0256771	0.0214014	0.0243014	0.02174	0.0151229		14.2	0.0795	0.0896	0.0463	0.0352	0.0357	0.0509	0.0323	0			0.0792	0.0886	0.046	0.0321	0.0336	0.048	0.0331	0		-0.0339371	-0.0359743	-0.0141286	-0.00642286	-0.0121986	-0.0236986	-0.01136	0.0151229		0.00115173	0.00129415	0.000199617	4.12531e-05	0.000148805	0.000561622	0.00012905	0.000228701
14.4	0.0578129	0.0596757	0.0333214	0.0330271	0.0226014	0.0263514	0.01599	0.0173729		14.4	0.08	0.0899	0.0477	0.0391	0.0427	0.0541	0.0349	0			0.079	0.0894	0.0473	0.0354	0.0389	0.0502	0.0336	0		-0.0211871	-0.0297243	-0.0139786	-0.00237286	-0.0162986	-0.0238486	-0.01761	0.0173729		0.000448895	0.000883533	0.0001954	5.63045e-06	0.000265643	0.000568754	0.000310112	0.000301816
14.6	0.0571129	0.0677257	0.0358214	0.0283271	0.0248514	0.0271514	0.01479	0.0209229		14.6	0.082	0.0893	0.0488	0.0403	0.0458	0.0555	0.0339	0.0236			0.0802	0.0891	0.0482	0.0386	0.0441	0.0519	0.0326	0.0232		-0.0230871	-0.0213743	-0.0123786	-0.0102729	-0.0192486	-0.0247486	-0.01781	-0.00227714		0.000533016	0.00045686	0.000153229	0.000105532	0.000370508	0.000612492	0.000317196	5.18538e-06
14.8	0.0652129	0.0858257	0.0331214	0.0296271	0.0264014	0.0394014	0.01759	0.0237729		14.8	0.0826	0.0891	0.0497	0.042	0.0448	0.0558	0.0363	0.0262			0.0814	0.0888	0.0493	0.0401	0.0433	0.0534	0.0335	0.0252		-0.0161871	-0.00297429	-0.0161786	-0.0104729	-0.0168986	-0.0139986	-0.01591	-0.00142714		0.000262024	8.84638e-06	0.000261746	0.000109681	0.000285562	0.00019596	0.000253128	2.03674e-06
15	0.0630129	0.0956257	0.0308214	0.0314771	0.0330014	0.0434014	0.01979	0.0276729		15	0.0819	0.0883	0.0506	0.0436	0.0467	0.0578	0.0386	0.0264			0.0811	0.0878	0.0494	0.0415	0.0436	0.0527	0.0338	0.0247		-0.0180871	0.00782571	-0.0185786	-0.0100229	-0.0105986	-0.00929857	-0.01401	0.00297286		0.000327145	6.12418e-05	0.000345163	0.000100458	0.00011233	8.64634e-05	0.00019628	8.83788e-06
15.2	0.0699629	0.105226	0.0323714	0.0381771	0.0268514	0.0451514	0.02119	0.0298229		15.2	0.0804	0.0873	0.0519	0.0444	0.046	0.0589	0.0423	0.0223			0.0797	0.0867	0.0501	0.0424	0.0441	0.0543	0.0359	0.0215		-0.00973714	0.0185257	-0.0177286	-0.00422286	-0.0172486	-0.00914857	-0.01471	0.00832286		9.4812e-05	0.000343202	0.000314302	1.78325e-05	0.000297513	8.36964e-05	0.000216384	6.927e-05
15.4	0.0670629	0.111276	0.0336214	0.0333271	0.0289014	0.0470514	0.02349	0.0261229		15.4	0.0785	0.0867	0.0526	0.0444	0.0479	0.0596	0.0421	0.0243			0.0781	0.0861	0.0509	0.0428	0.0442	0.0548	0.0388	0.0209		-0.0110371	0.0251757	-0.0172786	-0.00947286	-0.0152986	-0.00774857	-0.01531	0.00522286		0.000121819	0.000633817	0.000298549	8.9735e-05	0.000234046	6.00404e-05	0.000234396	2.72782e-05
15.6	0.0702629	0.0845257	0.0345214	0.0340271	0.0351514	0.0388514	0.02554	0.0298729		15.6	0.077	0.0859	0.0523	0.045	0.0468	0.0595	0.041	0.0257			0.0769	0.0854	0.0513	0.0429	0.0444	0.0554	0.039	0.025		-0.00663714	-0.000874286	-0.0167786	-0.00887286	-0.00924857	-0.0165486	-0.01346	0.00487286		4.40517e-05	7.64376e-07	0.00028152	7.87276e-05	8.55361e-05	0.000273855	0.000181172	2.37447e-05
15.8	0.0677629	0.0775257	0.0302714	0.0325771	0.0311514	0.0436514	0.02524	0.0307729		15.8	0.076	0.0847	0.0522	0.046	0.0472	0.0592	0.0417	0.0257			0.0756	0.084	0.051	0.0438	0.0438	0.0551	0.0385	0.0251		-0.00783714	-0.00647429	-0.0207286	-0.0112229	-0.0126486	-0.0114486	-0.01326	0.00567286		6.14208e-05	4.19164e-05	0.000429674	0.000125953	0.000159986	0.00013107	0.000175828	3.21813e-05
16	0.0772129	0.0747757	0.0344714	0.0393771	0.0330514	0.0485514	0.02714	0.0331729		16	0.0757	0.0843	0.0526	0.0467	0.047	0.0589	0.044	0.0251			0.075	0.0837	0.0509	0.0446	0.0437	0.0551	0.0385	0.0253		0.00221286	-0.00892429	-0.0164286	-0.00522286	-0.0106486	-0.00654857	-0.01136	0.00787286		4.89674e-06	7.96429e-05	0.000269898	2.72782e-05	0.000113392	4.28838e-05	0.00012905	6.19819e-05
16.2	0.0789129	0.0709757	0.0347714	0.0442771	0.0382014	0.0618514	0.02834	0.0332729		16.2	0.0757	0.0836	0.0521	0.0467	0.0469	0.058	0.046	0.025			0.0752	0.0832	0.0507	0.0451	0.0443	0.0544	0.0398	0.0245		0.00371286	-0.0122243	-0.0159286	-0.000822857	-0.00609857	0.00745143	-0.01146	0.00877286		1.37853e-05	0.000149433	0.000253719	6.77094e-07	3.71926e-05	5.55238e-05	0.000131332	7.6963e-05
16.4	0.0774629	0.0811757	0.0324214	0.0332771	0.0400014	0.0634014	0.03359	0.0343229		16.4	0.075	0.0832	0.0516	0.0469	0.0469	0.0572	0.0455	0.0257			0.0746	0.0827	0.0501	0.0452	0.0446	0.0537	0.0411	0.0247		0.00286286	-0.00152429	-0.0176786	-0.0119229	-0.00459857	0.00970143	-0.00751	0.00962286		8.19595e-06	2.32345e-06	0.000312532	0.000142155	2.11469e-05	9.41177e-05	5.64001e-05	9.25994e-05
16.6	0.0761629	0.0817757	0.0313214	0.0425271	0.0402014	0.0418514	0.03634	0.0313229		16.6	0.0745	0.0832	0.0517	0.047	0.0464	0.0568	0.0454	0.0265			0.074	0.0827	0.0498	0.0452	0.0446	0.0533	0.0409	0.0255		0.00216286	-0.000924286	-0.0184786	-0.00267286	-0.00439857	-0.0114486	-0.00456	0.00582286		4.67795e-06	8.54304e-07	0.000341458	7.14417e-06	1.93474e-05	0.00013107	2.07936e-05	3.39057e-05
16.8	0.0771129	0.0824257	0.0332714	0.0389271	0.0362014	0.0499514	0.03419	0.0316729		16.8	0.0741	0.0833	0.052	0.0466	0.0464	0.0569	0.0458	0.0262			0.0738	0.0828	0.0499	0.0453	0.0444	0.0528	0.041	0.0253		0.00331286	-0.000374286	-0.0166286	-0.00637286	-0.00819857	-0.00284857	-0.00681	0.00637286		1.0975e-05	1.4009e-07	0.000276509	4.06133e-05	6.72166e-05	8.11436e-06	4.63761e-05	4.06133e-05
17	0.0729629	0.0762257	0.0321214	0.0473271	0.0393514	0.0537514	0.03439	0.0324229		17	0.074	0.0833	0.0527	0.0468	0.0458	0.0564	0.0465	0.0258			0.0733	0.0828	0.0503	0.0453	0.0442	0.0531	0.0415	0.0254		-0.000337143	-0.00657429	-0.0181786	0.00202714	-0.00484857	0.000651429	-0.00711	0.00702286		1.13665e-07	4.32212e-05	0.00033046	4.10931e-06	2.35086e-05	4.24359e-07	5.05521e-05	4.93205e-05
17.2	0.0750129	0.0799757	0.0358214	0.0399271	0.0415014	0.0636014	0.03454	0.0307229		17.2	0.0739	0.0826	0.0528	0.0468	0.0456	0.0563	0.0467	0.0255			0.0731	0.0824	0.0508	0.0453	0.0443	0.0529	0.0422	0.0247		0.00191286	-0.00242429	-0.0149786	-0.00537286	-0.00279857	0.0107014	-0.00766	0.00602286		3.65902e-06	5.87716e-06	0.000224358	2.88676e-05	7.832e-06	0.000114521	5.86756e-05	3.62748e-05
17.4	0.0708629	0.0837757	0.0352214	0.0432771	0.0432514	0.0693514	0.03829	0.0321729		17.4	0.0737	0.0817	0.0523	0.047	0.0453	0.0558	0.0465	0.0248			0.073	0.0815	0.051	0.0453	0.0443	0.0527	0.0425	0.0244		-0.00213714	0.00227571	-0.0157786	-0.00202286	-0.00104857	0.0166514	-0.00421	0.00777286		4.56738e-06	5.17888e-06	0.000248963	4.09195e-06	1.0995e-06	0.00027727	1.77241e-05	6.04173e-05
17.6	0.0708629	0.0842257	0.0340714	0.0421271	0.0461014	0.0547014	0.03414	0.0338229		17.6	0.0734	0.0809	0.0522	0.0471	0.0453	0.0559	0.0463	0.0241			0.0728	0.0806	0.0511	0.0455	0.0442	0.0526	0.0426	0.0248		-0.00193714	0.00362571	-0.0170286	-0.00337286	0.00190143	0.00210143	-0.00846	0.00902286		3.75252e-06	1.31458e-05	0.000289972	1.13762e-05	3.61543e-06	4.416e-06	7.15716e-05	8.1412e-05
17.8	0.0729629	0.0819257	0.0336214	0.0453771	0.0394514	0.0497514	0.04119	0.0291229		17.8	0.0729	0.08	0.0524	0.0472	0.0456	0.0556	0.0469	0.0266			0.0724	0.0796	0.0511	0.0455	0.0442	0.0524	0.0428	0.0251		0.000562857	0.00232571	-0.0174786	-0.000122857	-0.00474857	-0.00264857	-0.00161	0.00402286		3.16808e-07	5.40895e-06	0.0003055	1.50939e-08	2.25489e-05	7.01493e-06	2.5921e-06	1.61834e-05
18	0.0697129	0.0762757	0.0375214	0.0404271	0.0399014	0.0540514	0.04054	0.0290729		18	0.0724	0.0794	0.0527	0.0473	0.0457	0.0551	0.0481	0.0288			0.072	0.0789	0.0511	0.0456	0.0442	0.0521	0.0435	0.0251		-0.00228714	-0.00262429	-0.0135786	-0.00517286	-0.00429857	0.00195143	-0.00296	0.00397286		5.23102e-06	6.88688e-06	0.000184378	2.67585e-05	1.84777e-05	3.80807e-06	8.7616e-06	1.57836e-05
18.2	0.0742629	0.0809757	0.0325714	0.0507771	0.0393014	0.0642014	0.04084	0.0342229		18.2	0.0721	0.0796	0.0526	0.0476	0.0459	0.0547	0.0484	0.0286			0.0717	0.0786	0.0511	0.0457	0.0442	0.0518	0.0445	0.0255		0.00256286	0.00237571	-0.0185286	0.00507714	-0.00489857	0.0124014	-0.00366	0.00872286		6.56824e-06	5.64402e-06	0.000343308	2.57774e-05	2.3996e-05	0.000153795	1.33956e-05	7.60882e-05
18.4	0.0737629	0.0815257	0.0325714	0.0409771	0.0416514	0.0710014	0.04294	0.0291729		18.4	0.0721	0.0796	0.0524	0.0476	0.0456	0.0547	0.0487	0.026			0.0717	0.0788	0.0513	0.0456	0.0442	0.0514	0.0451	0.0258		0.00206286	0.00272571	-0.0187286	-0.00462286	-0.00254857	0.0196014	-0.00216	0.00337286		4.25538e-06	7.42952e-06	0.000350759	2.13708e-05	6.49522e-06	0.000384216	4.6656e-06	1.13762e-05
18.6	0.0740629	0.0788257	0.0320214	0.0417771	0.0400014	0.0601014	0.03824	0.0300729		18.6	0.0723	0.0797	0.0521	0.0473	0.0456	0.0549	0.049	0.0277			0.0717	0.079	0.0511	0.0457	0.044	0.0511	0.0456	0.0262		0.00236286	-0.000174286	-0.0190786	-0.00392286	-0.00399857	0.00900143	-0.00736	0.00387286		5.58309e-06	3.03755e-08	0.000363992	1.53888e-05	1.59886e-05	8.10257e-05	5.41696e-05	1.4999e-05
18.8	0.0743129	0.0785257	0.0317714	0.0413271	0.0428514	0.0538514	0.04364	0.0309729		18.8	0.0726	0.0797	0.052	0.0472	0.0454	0.0551	0.0496	0.0274			0.0719	0.0792	0.0512	0.0458	0.0441	0.0515	0.0459	0.0262		0.00241286	-0.000674286	-0.0194286	-0.00447286	-0.00124857	0.00235143	-0.00226	0.00477286		5.82188e-06	4.54661e-07	0.000377469	2.00065e-05	1.55893e-06	5.52922e-06	5.1076e-06	2.27802e-05
19	0.0730629	0.0849757	0.0327714	0.0526771	0.0372014	0.0570514	0.04139	0.0302729		19	0.0724	0.0799	0.0519	0.0476	0.0454	0.0553	0.0502	0.0273			0.0718	0.0791	0.0513	0.0459	0.0441	0.0518	0.0461	0.0259		0.00126286	0.00587571	-0.0185286	0.00677714	-0.00689857	0.00525143	-0.00471	0.00437286		1.59481e-06	3.4524e-05	0.000343308	4.59297e-05	4.75903e-05	2.75775e-05	2.21841e-05	1.91219e-05
19.2	0.0711129	0.0779757	0.0355214	0.0408771	0.0432014	0.0669014	0.03859	0.0340729		19.2	0.0723	0.0799	0.0517	0.0482	0.0454	0.0555	0.0498	0.0282			0.0719	0.0791	0.0513	0.046	0.044	0.0522	0.0463	0.026		-0.000787143	-0.00112429	-0.0157786	-0.00512286	-0.000798571	0.0147014	-0.00771	0.00807286		6.19594e-07	1.26402e-06	0.000248963	2.62437e-05	6.37716e-07	0.000216132	5.94441e-05	6.5171e-05
19.4	0.0724629	0.0750757	0.0300214	0.0425771	0.0384514	0.0736014	0.04249	0.0312729		19.4	0.0719	0.0796	0.0516	0.0483	0.0456	0.0557	0.0496	0.0302			0.0714	0.079	0.0514	0.0462	0.0442	0.0525	0.0463	0.0266		0.00106286	-0.00392429	-0.0213786	-0.00362286	-0.00574857	0.0211014	-0.00381	0.00467286		1.12967e-06	1.54e-05	0.000457043	1.31251e-05	3.30461e-05	0.00044527	1.45161e-05	2.18356e-05
19.6	0.0699129	0.0842257	0.0302714	0.0423271	0.0482014	0.0530014	0.04449	0.0293729		19.6	0.0716	0.0793	0.0521	0.0483	0.0457	0.0556	0.0498	0.0323			0.0711	0.0788	0.0514	0.0463	0.0443	0.0527	0.0468	0.0274		-0.00118714	0.00542571	-0.0211286	-0.00397286	0.00390143	0.000301429	-0.00231	0.00197286		1.40931e-06	2.94384e-05	0.000446417	1.57836e-05	1.52211e-05	9.08592e-08	5.3361e-06	3.89217e-06
19.8	0.0704629	0.0813757	0.0324714	0.0427771	0.0452014	0.0497514	0.04469	0.0366229		19.8	0.0712	0.0789	0.0525	0.0482	0.046	0.0554	0.0501	0.0314			0.0707	0.0785	0.0514	0.0466	0.0445	0.0525	0.0475	0.0279		-0.000237143	0.00287571	-0.0189286	-0.00382286	0.000701429	-0.00274857	-0.00281	0.00872286		5.62367e-08	8.26973e-06	0.000358291	1.46142e-05	4.92002e-07	7.55464e-06	7.8961e-06	7.60882e-05
20	0.0717629	0.0910757	0.0322214	0.0452771	0.0421514	0.0529014	0.04289	0.0306729		20	0.0708	0.0785	0.0527	0.0481	0.046	0.0554	0.0505	0.0292			0.0703	0.0781	0.0516	0.0468	0.0446	0.0521	0.0478	0.0273		0.00146286	0.0129757	-0.0193786	-0.00152286	-0.00244857	0.000801429	-0.00491	0.00337286		2.13995e-06	0.000168369	0.000375529	2.31909e-06	5.9955e-06	6.42288e-07	2.41081e-05	1.13762e-05
20.2	0.0725129	0.0865757	0.0305714	0.0416771	0.0406514	0.0665014	0.04224	0.0273729		20.2	0.0705	0.0779	0.0523	0.0477	0.0458	0.0559	0.0517	0.0315			0.07	0.0775	0.0517	0.0468	0.0446	0.0519	0.0476	0.0263		0.00251286	0.00907571	-0.0211286	-0.00512286	-0.00394857	0.0146014	-0.00536	0.00107286		6.31445e-06	8.23686e-05	0.000446417	2.62437e-05	1.55912e-05	0.000213202	2.87296e-05	1.15102e-06
20.4	0.0702629	0.0827757	0.0291214	0.0471271	0.0410514	0.0609014	0.04319	0.0306229		20.4	0.0702	0.0772	0.0515	0.0474	0.0456	0.0563	0.0524	0.033			0.0697	0.077	0.0514	0.0466	0.0444	0.0519	0.0472	0.0271		0.000562857	0.00577571	-0.0222786	0.000527143	-0.00334857	0.00900143	-0.00401	0.00352286		3.16808e-07	3.33589e-05	0.000496335	2.7788e-07	1.12129e-05	8.10257e-05	1.60801e-05	1.24105e-05
20.6	0.0706629	0.0781757	0.0301714	0.0368271	0.0390014	0.0530014	0.04664	0.0311729		20.6	0.0697	0.0765	0.0508	0.0475	0.0456	0.0561	0.0519	0.0295			0.0693	0.0762	0.0509	0.0463	0.0442	0.0522	0.0475	0.0284		0.00136286	0.00197571	-0.0207286	-0.00947286	-0.00519857	0.000801429	-0.00086	0.00277286		1.85738e-06	3.90345e-06	0.000429674	8.9735e-05	2.70251e-05	6.42288e-07	7.396e-07	7.68874e-06
20.8	0.0715129	0.0853257	0.0327214	0.0444771	0.0385514	0.0477014	0.04089	0.0393229		20.8	0.0693	0.0759	0.0504	0.0477	0.046	0.0554	0.0508	0.0298			0.0688	0.0756	0.0505	0.0463	0.044	0.0523	0.0484	0.0286		0.00271286	0.00972571	-0.0177786	-0.00182286	-0.00544857	-0.00459857	-0.00751	0.0107229		7.35959e-06	9.45895e-05	0.000316078	3.32281e-06	2.96869e-05	2.11469e-05	5.64001e-05	0.00011498
21	0.0716129	0.0829757	0.0332714	0.0414771	0.0390014	0.0596014	0.04209	0.0320729		21	0.0686	0.0754	0.0502	0.0476	0.046	0.0547	0.0501	0.0303			0.0682	0.075	0.0504	0.0463	0.044	0.0523	0.0491	0.0272		0.00341286	0.00797571	-0.0171286	-0.00482286	-0.00499857	0.00730143	-0.00701	0.00487286		1.16476e-05	6.3612e-05	0.000293388	2.326e-05	2.49857e-05	5.33109e-05	4.91401e-05	2.37447e-05
21.2	0.0729629	0.0794257	0.0340214	0.0444271	0.0385514	0.0672014	0.03899	0.0269229		21.2	0.068	0.0748	0.0501	0.0477	0.0454	0.0542	0.05	0.032			0.0677	0.0744	0.0504	0.0462	0.0439	0.052	0.0489	0.0272		0.00526286	0.00502571	-0.0163786	-0.00177286	-0.00534857	0.0152014	-0.00991	-0.000277143		2.76977e-05	2.52578e-05	0.000268258	3.14302e-06	2.86072e-05	0.000231083	9.82081e-05	7.68082e-08
21.4	0.0713129	0.0802257	0.0331214	0.0406771	0.0443514	0.0627514	0.04089	0.0309729		21.4	0.0675	0.0742	0.0503	0.0476	0.0448	0.0541	0.0506	0.0306			0.0671	0.0739	0.0503	0.0461	0.0438	0.0518	0.0482	0.0276		0.00421286	0.00632571	-0.0171786	-0.00542286	0.000551429	0.0109514	-0.00731	0.00337286		1.77482e-05	4.00147e-05	0.000295103	2.94074e-05	3.04073e-07	0.000119934	5.34361e-05	1.13762e-05
21.6	0.0684129	0.0817257	0.0334214	0.0419771	0.0421014	0.0570514	0.04204	0.0310729		21.6	0.0668	0.0737	0.0505	0.0471	0.0444	0.0538	0.0511	0.0291			0.0665	0.0734	0.0505	0.0461	0.0436	0.0518	0.048	0.0279		0.00191286	0.00832571	-0.0170786	-0.00412286	-0.00149857	0.00525143	-0.00596	0.00317286		3.65902e-06	6.93175e-05	0.000291678	1.6998e-05	2.24572e-06	2.75775e-05	3.55216e-05	1.0067e-05
21.8	0.0695629	0.0768757	0.0325714	0.0451271	0.0490014	0.0508514	0.04269	0.0332229		21.8	0.0662	0.0731	0.0506	0.0467	0.044	0.0537	0.0512	0.031			0.0659	0.0728	0.0505	0.046	0.0435	0.0518	0.0486	0.028		0.00366286	0.00407571	-0.0179286	-0.000872857	0.00550143	-0.000948571	-0.00591	0.00522286		1.34165e-05	1.66114e-05	0.000321434	7.6188e-07	3.02657e-05	8.99788e-07	3.49281e-05	2.72782e-05
22	0.0676129	0.0797257	0.0339214	0.0458771	0.0403014	0.0482014	0.04729	0.0272229		22	0.0656	0.0725	0.0501	0.0465	0.0441	0.0541	0.0514	0.031			0.0653	0.0723	0.0504	0.0458	0.0433	0.0517	0.0491	0.0284		0.00231286	0.00742571	-0.0164786	7.71429e-05	-0.00299857	-0.00349857	-0.00181	-0.00117714		5.34931e-06	5.51412e-05	0.000271543	5.95102e-09	8.99143e-06	1.224e-05	3.2761e-06	1.38567e-06
22.2	0.0674629	0.0791757	0.0333214	0.0386771	0.0429514	0.0576014	0.03539	0.0295229		22.2	0.065	0.072	0.0495	0.0464	0.0445	0.0544	0.0512	0.0293			0.0648	0.0718	0.0502	0.0456	0.0433	0.0516	0.0491	0.0276		0.00266286	0.00737571	-0.0168786	-0.00692286	-0.000348571	0.00600143	-0.01371	0.00192286		7.09081e-06	5.44012e-05	0.000284886	4.7926e-05	1.21502e-07	3.60171e-05	0.000187964	3.69738e-06
22.4	0.0694629	0.0724257	0.0335214	0.0419771	0.0439014	0.0628514	0.04369	0.0294229		22.4	0.0647	0.0718	0.0492	0.0462	0.045	0.054	0.0506	0.0312			0.0644	0.0714	0.0499	0.0454	0.0435	0.0513	0.0489	0.0275		0.00506286	0.00102571	-0.0163786	-0.00342286	0.000401429	0.0115514	-0.00521	0.00192286		2.56325e-05	1.05209e-06	0.000268258	1.1716e-05	1.61145e-07	0.000133436	2.71441e-05	3.69738e-06
22.6	0.0671629	0.0774757	0.0324714	0.0431771	0.0442514	0.0592014	0.03909	0.0309229		22.6	0.0646	0.0717	0.0491	0.0461	0.0454	0.0529	0.05	0.0306			0.0643	0.0712	0.0497	0.0454	0.0438	0.0511	0.0486	0.0276		0.00286286	0.00627571	-0.0172286	-0.00222286	0.000451429	0.00810143	-0.00951	0.00332286		8.19595e-06	3.93846e-05	0.000296824	4.94109e-06	2.03788e-07	6.56331e-05	9.04401e-05	1.10414e-05
22.8	0.0672629	0.0781257	0.0328714	0.0446271	0.0445514	0.0584514	0.04419	0.0331729		22.8	0.0646	0.0717	0.0491	0.0462	0.045	0.0521	0.0496	0.0282			0.0643	0.0712	0.0495	0.0455	0.0439	0.0508	0.0484	0.0271		0.00296286	0.00692571	-0.0166286	-0.000872857	0.000651429	0.00765143	-0.00421	0.00607286		8.77852e-06	4.79655e-05	0.000276509	7.6188e-07	4.24359e-07	5.85444e-05	1.77241e-05	3.68796e-05
23	0.0655629	0.0781257	0.0340714	0.0447271	0.0370014	0.0583514	0.04289	0.0337729		23	0.0647	0.0717	0.049	0.0463	0.0442	0.052	0.0493	0.0305			0.0644	0.0712	0.0494	0.0456	0.0437	0.0505	0.0484	0.0265		0.00116286	0.00692571	-0.0153286	-0.000872857	-0.00669857	0.00785143	-0.00551	0.00727286		1.35224e-06	4.79655e-05	0.000234965	7.6188e-07	4.48709e-05	6.16449e-05	3.03601e-05	5.28945e-05
23.2	0.0646629	0.0752757	0.0359214	0.0389271	0.0446514	0.0561514	0.04054	0.0293729		23.2	0.0647	0.0717	0.0492	0.0462	0.0434	0.0525	0.0496	0.032			0.0644	0.0713	0.0494	0.0457	0.0434	0.0505	0.0483	0.027		0.000262857	0.00397571	-0.0134786	-0.00677286	0.00125143	0.00565143	-0.00776	0.00237286		6.90939e-08	1.58063e-05	0.000181672	4.58716e-05	1.56607e-06	3.19386e-05	6.02176e-05	5.63045e-06
23.4	0.0646129	0.0781257	0.0345214	0.0415771	0.0432014	0.0590514	0.04449	0.0292729		23.4	0.0647	0.0716	0.0494	0.046	0.0431	0.0529	0.05	0.0317			0.0643	0.0712	0.0495	0.0458	0.0432	0.0507	0.0482	0.0274		0.000312857	0.00692571	-0.0149786	-0.00422286	1.42857e-06	0.00835143	-0.00371	0.00187286		9.78796e-08	4.79655e-05	0.000224358	1.78325e-05	2.04082e-12	6.97464e-05	1.37641e-05	3.50759e-06
23.6	0.0654129	0.0779257	0.0331214	0.0415771	0.0434514	0.0621514	0.04084	0.0309229		23.6	0.0644	0.0714	0.0492	0.0461	0.0432	0.0529	0.0501	0.0321			0.0641	0.071	0.0496	0.0459	0.0431	0.0509	0.0481	0.0287		0.00131286	0.00692571	-0.0164786	-0.00432286	0.000351429	0.0112514	-0.00726	0.00222286		1.72359e-06	4.79655e-05	0.000271543	1.86871e-05	1.23502e-07	0.000126595	5.27076e-05	4.94109e-06
23.8	0.0679129	0.0737757	0.0321214	0.0401771	0.0471514	0.0580014	0.04099	0.0324229		23.8	0.0641	0.0712	0.0485	0.0464	0.0436	0.0528	0.0502	0.0352			0.0637	0.0708	0.0495	0.0459	0.0432	0.0511	0.0481	0.0291		0.00421286	0.00297571	-0.0173786	-0.00572286	0.00395143	0.00690143	-0.00711	0.00332286		1.77482e-05	8.85488e-06	0.000302015	3.27511e-05	1.56138e-05	4.76297e-05	5.05521e-05	1.10414e-05
24	0.0666129	0.0800757	0.0347214	0.0446271	0.0418514	0.0561514	0.03974	0.0304729		24	0.0636	0.0709	0.0481	0.0465	0.0439	0.0527	0.0497	0.0297			0.0633	0.0707	0.0493	0.0459	0.0432	0.0509	0.0481	0.03		0.00331286	0.00937571	-0.0145786	-0.00127286	-0.00134857	0.00525143	-0.00836	0.000472857		1.0975e-05	8.7904e-05	0.000212535	1.62017e-06	1.81864e-06	2.75775e-05	6.98896e-05	2.23594e-07
24.2	0.0636129	0.0773757	0.0356214	0.0393271	0.0461014	0.0508514	0.04334	0.0334729		24.2	0.0632	0.0705	0.0482	0.0462	0.0441	0.0524	0.0492	0.0298			0.063	0.0703	0.049	0.0457	0.0432	0.0506	0.0482	0.0291		0.000612857	0.00707571	-0.0133786	-0.00637286	0.00290143	0.000251429	-0.00486	0.00437286		3.75594e-07	5.00657e-05	0.000178986	4.06133e-05	8.41829e-06	6.32163e-08	2.36196e-05	1.91219e-05
24.4	0.0651129	0.0710757	0.0347214	0.0445771	0.0441514	0.0508514	0.04074	0.0311729		24.4	0.0628	0.0699	0.0481	0.0462	0.044	0.0518	0.0488	0.0312			0.0626	0.0698	0.0487	0.0456	0.0432	0.0503	0.0481	0.0271		0.00251286	0.00127571	-0.0139786	-0.00102286	0.000951429	0.000551429	-0.00736	0.00407286		6.31445e-06	1.62745e-06	0.0001954	1.04624e-06	9.05216e-07	3.04073e-07	5.41696e-05	1.65882e-05
24.6	0.0654629	0.0728757	0.0327714	0.0460771	0.0409514	0.0535014	0.03824	0.0324229		24.6	0.0623	0.0693	0.0479	0.0461	0.0436	0.0515	0.0486	0.0327			0.0623	0.0692	0.0484	0.0455	0.0431	0.0501	0.0479	0.0285		0.00316286	0.00367571	-0.0156286	0.000577143	-0.00214857	0.00340143	-0.00966	0.00392286		1.00037e-05	1.35109e-05	0.000244252	3.33094e-07	4.61636e-06	1.15697e-05	9.33156e-05	1.53888e-05
24.8	0.0642629	0.0756257	0.0310214	0.0397771	0.0429514	0.0519514	0.04409	0.0311729		24.8	0.0619	0.0686	0.0477	0.0457	0.0431	0.0514	0.0486	0.031			0.0619	0.0685	0.0483	0.0454	0.0429	0.0499	0.0479	0.0291		0.00236286	0.00712571	-0.0172786	-0.00562286	5.14286e-05	0.00205143	-0.00381	0.00207286		5.58309e-06	5.07758e-05	0.000298549	3.16165e-05	2.6449e-09	4.20836e-06	1.45161e-05	4.29674e-06
25	0.0636129	0.0735757	0.0325714	0.0404771	0.0453514	0.0563014	0.03829	0.0292229		25	0.0614	0.0679	0.0475	0.0451	0.0423	0.0516	0.0489	0.0302			0.0614	0.0678	0.0481	0.0452	0.0426	0.0497	0.0477	0.0285		0.00221286	0.00577571	-0.0155286	-0.00472286	0.00275143	0.00660143	-0.00941	0.000722857		4.89674e-06	3.33589e-05	0.000241137	2.23054e-05	7.57036e-06	4.35789e-05	8.85481e-05	5.22522e-07
25.2	0.0642129	0.0756757	0.0319714	0.0398271	0.0436014	0.0559014	0.04454	0.0292229		25.2	0.0609	0.0674	0.0473	0.0446	0.0418	0.0516	0.049	0.0307			0.0609	0.0672	0.0479	0.0448	0.0422	0.0495	0.0473	0.0306		0.00331286	0.00847571	-0.0159286	-0.00497286	0.00140143	0.00640143	-0.00276	-0.00137714		1.0975e-05	7.18377e-05	0.000253719	2.47293e-05	1.964e-06	4.09783e-05	7.6176e-06	1.89652e-06
25.4	0.0632129	0.0740757	0.0302214	0.0416771	0.0412014	0.0532014	0.04024	0.0273229		25.4	0.0606	0.0672	0.0469	0.0444	0.0417	0.0511	0.0488	0.0302			0.0605	0.0669	0.0477	0.0445	0.0418	0.0494	0.0471	0.025		0.00271286	0.00717571	-0.0174786	-0.00282286	-0.000598571	0.00380143	-0.00686	0.00232286		7.35959e-06	5.14909e-05	0.0003055	7.96852e-06	3.58288e-07	1.44509e-05	4.70596e-05	5.39567e-06
25.6	0.0628629	0.0725757	0.0298714	0.0416771	0.0409014	0.0534014	0.04054	0.0315229		25.6	0.0604	0.0672	0.0466	0.0442	0.042	0.0504	0.0482	0.0291			0.0604	0.0669	0.0476	0.0441	0.0415	0.0493	0.0472	0.0271		0.00246286	0.00567571	-0.0177286	-0.00242286	-0.000598571	0.00410143	-0.00666	0.00442286		6.06567e-06	3.22137e-05	0.000314302	5.87024e-06	3.58288e-07	1.68217e-05	4.43556e-05	1.95617e-05
25.8	0.0611129	0.0744757	0.0313714	0.0408771	0.0401014	0.0490514	0.03764	0.0314229		25.8	0.0604	0.0673	0.0464	0.0441	0.0421	0.05	0.0472	0.0318			0.0603	0.067	0.0476	0.044	0.0414	0.049	0.0471	0.0292		0.000812857	0.00747571	-0.0162286	-0.00312286	-0.00129857	5.14286e-05	-0.00946	0.00222286		6.60737e-07	5.58863e-05	0.000263367	9.75224e-06	1.68629e-06	2.6449e-09	8.94916e-05	4.94109e-06
26	0.0614129	0.0751757	0.0316214	0.0398271	0.0419514	0.0575514	0.03909	0.0319229		26	0.0603	0.0674	0.0465	0.0441	0.0419	0.0499	0.0465	0.0329			0.0602	0.0671	0.0474	0.0439	0.0413	0.0487	0.0467	0.0283		0.00121286	0.00807571	-0.0157786	-0.00407286	0.000651429	0.00885143	-0.00761	0.00362286		1.47102e-06	6.52172e-05	0.000248963	1.65882e-05	4.24359e-07	7.83478e-05	5.79121e-05	1.31251e-05
26.2	0.0632129	0.0705257	0.0320714	0.0419271	0.0421514	0.0545514	0.04249	0.0311729		26.2	0.0603	0.0674	0.0467	0.0442	0.0413	0.05	0.0467	0.0253			0.0601	0.0671	0.0474	0.044	0.0413	0.0486	0.0461	0.0285		0.00311286	0.00342571	-0.0153286	-0.00207286	0.000851429	0.00595143	-0.00361	0.00267286		9.68988e-06	1.17355e-05	0.000234965	4.29674e-06	7.24931e-07	3.54195e-05	1.30321e-05	7.14417e-06
26.4	0.0605129	0.0754257	0.0312714	0.0358771	0.0402514	0.0543014	0.04219	0.0290729		26.4	0.0601	0.0673	0.0467	0.0444	0.0409	0.05	0.0472	0.0263			0.0599	0.067	0.0473	0.0442	0.0413	0.0486	0.0459	0.0299		0.000612857	0.00842571	-0.0160286	-0.00832286	-0.00104857	0.00570143	-0.00371	-0.000827143		3.75594e-07	7.09927e-05	0.000256915	6.927e-05	1.0995e-06	3.25063e-05	1.37641e-05	6.84165e-07
26.6	0.0620629	0.0708757	0.0332214	0.0439771	0.0415514	0.0517014	0.03919	0.0292729		26.6	0.0598	0.0671	0.0465	0.0443	0.0407	0.0499	0.0474	0.0299			0.0596	0.0668	0.0473	0.0442	0.0412	0.0486	0.0461	0.0267		0.00246286	0.00407571	-0.0140786	-0.000222857	0.000351429	0.00310143	-0.00691	0.00257286		6.06567e-06	1.66114e-05	0.000198206	4.96653e-08	1.23502e-07	9.61886e-06	4.77481e-05	6.61959e-06
26.8	0.0609129	0.0735757	0.0315714	0.0363771	0.0350514	0.0474014	0.04124	0.0303729		26.8	0.0594	0.0668	0.0461	0.0441	0.0409	0.0498	0.0473	0.0318			0.0593	0.0666	0.0472	0.0442	0.0411	0.0485	0.0464	0.025		0.00161286	0.00697571	-0.0156286	-0.00782286	-0.00604857	-0.00109857	-0.00516	0.00537286		2.60131e-06	4.86606e-05	0.000244252	6.11971e-05	3.65852e-05	1.20686e-06	2.66256e-05	2.88676e-05
27	0.0639629	0.0754757	0.0303214	0.0417771	0.0377514	0.0448014	0.03719	0.0294729		27	0.0591	0.0665	0.0459	0.0438	0.0411	0.0497	0.0473	0.0291			0.059	0.0662	0.0469	0.044	0.041	0.0483	0.0464	0.0283		0.00496286	0.00927571	-0.0165786	-0.00222286	-0.00324857	-0.00349857	-0.00921	0.00117286		2.463e-05	8.60389e-05	0.000274849	4.94109e-06	1.05532e-05	1.224e-05	8.48241e-05	1.37559e-06
27.2	0.0626129	0.0712257	0.0323714	0.0373271	0.0407514	0.0516014	0.04004	0.0299729		27.2	0.0588	0.0661	0.0457	0.0436	0.0412	0.0496	0.0472	0.031			0.0587	0.0659	0.0466	0.0438	0.0409	0.0481	0.0462	0.0305		0.00391286	0.00532571	-0.0142286	-0.00647286	-0.000148571	0.00350143	-0.00616	-0.000527143		1.53105e-05	2.83632e-05	0.000202452	4.18979e-05	2.20735e-08	1.226e-05	3.79456e-05	2.7788e-07
27.4	0.0604129	0.0714757	0.0324214	0.0384271	0.0421014	0.0539514	0.03974	0.0280729		27.4	0.0586	0.0659	0.0455	0.0434	0.0411	0.0493	0.0468	0.028			0.0585	0.0656	0.0464	0.0436	0.0408	0.0479	0.046	0.0291		0.00191286	0.00587571	-0.0139786	-0.00517286	0.00130143	0.00605143	-0.00626	-0.00102714		3.65902e-06	3.4524e-05	0.0001954	2.67585e-05	1.69372e-06	3.66198e-05	3.91876e-05	1.05502e-06
27.6	0.0609629	0.0726257	0.0321714	0.0400771	0.0375514	0.0540514	0.04009	0.0302729		27.6	0.0584	0.0656	0.0453	0.0433	0.0408	0.0491	0.0463	0.0255			0.0583	0.0653	0.0462	0.0433	0.0406	0.0478	0.0458	0.0288		0.00266286	0.00732571	-0.0140286	-0.00322286	-0.00304857	0.00625143	-0.00571	0.00147286		7.09081e-06	5.36661e-05	0.000196801	1.03868e-05	9.29379e-06	3.90804e-05	3.26041e-05	2.16931e-06
27.8	0.0597629	0.0708257	0.0317214	0.0372271	0.0387014	0.0531514	0.03669	0.0306229		27.8	0.0583	0.0653	0.0452	0.0433	0.0404	0.0491	0.0462	0.0282			0.0582	0.0651	0.0461	0.0431	0.0404	0.0478	0.0459	0.0275		0.00156286	0.00572571	-0.0143786	-0.00587286	-0.00169857	0.00535143	-0.00921	0.00312286		2.44252e-06	3.27838e-05	0.000206743	3.44905e-05	2.88514e-06	2.86378e-05	8.48241e-05	9.75224e-06
28	0.0629129	0.0700757	0.0331714	0.0417771	0.0429014	0.0489514	0.04029	0.0312229		28	0.0581	0.065	0.0452	0.0432	0.0401	0.049	0.0464	0.0316			0.058	0.0648	0.046	0.0429	0.0402	0.0477	0.046	0.026		0.00491286	0.00527571	-0.0128286	-0.00112286	0.00270143	0.00125143	-0.00571	0.00522286		2.41362e-05	2.78332e-05	0.000164572	1.26081e-06	7.29772e-06	1.56607e-06	3.26041e-05	2.72782e-05
28.2	0.0614629	0.0714257	0.0322214	0.0338771	0.0407014	0.0492514	0.03989	0.0318729		28.2	0.058	0.0647	0.0452	0.0429	0.0399	0.0489	0.0466	0.0336			0.0579	0.0646	0.0459	0.0429	0.0402	0.0476	0.046	0.0268		0.00356286	0.00682571	-0.0136786	-0.00902286	0.000501429	0.00165143	-0.00611	0.00507286		1.2694e-05	4.65904e-05	0.000187103	8.1412e-05	2.51431e-07	2.72722e-06	3.73321e-05	2.57339e-05
28.4	0.0611629	0.0710757	0.0364214	0.0435771	0.0383014	0.0487014	0.04219	0.0296729		28.4	0.058	0.0645	0.0451	0.0425	0.04	0.0485	0.0465	0.0283			0.0579	0.0644	0.0459	0.0428	0.0402	0.0474	0.0457	0.0292		0.00326286	0.00667571	-0.00947857	0.000777143	-0.00189857	0.00130143	-0.00351	0.000472857		1.06462e-05	4.45652e-05	8.98433e-05	6.03951e-07	3.60457e-06	1.69372e-06	1.23201e-05	2.23594e-07
28.6	0.0607129	0.0704757	0.0343714	0.0315271	0.0393514	0.0516514	0.03899	0.0297729		28.6	0.0579	0.0644	0.0448	0.0424	0.0402	0.0483	0.0463	0.0266			0.0579	0.0643	0.0458	0.0427	0.0402	0.0473	0.0453	0.0277		0.00281286	0.00617571	-0.0114286	-0.0111729	-0.000848571	0.00435143	-0.00631	0.00207286		7.91217e-06	3.81394e-05	0.000130612	0.000124833	7.20073e-07	1.89349e-05	3.98161e-05	4.29674e-06
28.8	0.0593129	0.0706757	0.0307714	0.0434771	0.0387014	0.0510014	0.04104	0.0292729		28.8	0.0579	0.0643	0.0446	0.0424	0.0403	0.0482	0.046	0.0299			0.0579	0.0642	0.0458	0.0425	0.04	0.0473	0.0451	0.0261		0.00141286	0.00647571	-0.0150286	0.000977143	-0.00129857	0.00370143	-0.00406	0.00317286		1.99617e-06	4.19349e-05	0.000225858	9.54808e-07	1.68629e-06	1.37006e-05	1.64836e-05	1.0067e-05
29	0.0591129	0.0724757	0.0317714	0.0375271	0.0376014	0.0503014	0.03529	0.0294229		29	0.0577	0.0642	0.0446	0.0425	0.0401	0.0484	0.0456	0.0302			0.0576	0.064	0.0457	0.0425	0.0399	0.0472	0.045	0.0248		0.00151286	0.00847571	-0.0139286	-0.00497286	-0.00229857	0.00310143	-0.00971	0.00462286		2.28874e-06	7.18377e-05	0.000194005	2.47293e-05	5.28343e-06	9.61886e-06	9.42841e-05	2.13708e-05
29.2	0.0621629	0.0716257	0.0332214	0.0350771	0.0403514	0.0527014	0.03949	0.0290229		29.2	0.0574	0.064	0.0447	0.0424	0.0397	0.0484	0.0454	0.0306			0.0574	0.0639	0.0457	0.0426	0.0397	0.0471	0.0452	0.0261		0.00476286	0.00772571	-0.0124786	-0.00752286	0.000651429	0.00560143	-0.00571	0.00292286		2.26848e-05	5.96867e-05	0.000155715	5.65934e-05	4.24359e-07	3.1376e-05	3.26041e-05	8.54309e-06
29.4	0.0580629	0.0710757	0.0317214	0.0425771	0.0404014	0.0519014	0.03889	0.0273729		29.4	0.0569	0.0637	0.0446	0.0424	0.0394	0.0482	0.0454	0.0318			0.057	0.0636	0.0455	0.0426	0.0396	0.047	0.0452	0.0277		0.00106286	0.00747571	-0.0137786	-2.28571e-05	0.000801429	0.00490143	-0.00631	-0.000327143		1.12967e-06	5.58863e-05	0.000189849	5.22449e-10	6.42288e-07	2.4024e-05	3.98161e-05	1.07022e-07
29.6	0.0579629	0.0700757	0.0326214	0.0320771	0.0382514	0.0496514	0.04199	0.0277729		29.6	0.0564	0.0635	0.0443	0.0424	0.0393	0.0479	0.0454	0.0294			0.0565	0.0633	0.0453	0.0425	0.0396	0.0469	0.045	0.0262		0.00146286	0.00677571	-0.0126786	-0.0104229	-0.00134857	0.00275143	-0.00301	0.00157286		2.13995e-06	4.59103e-05	0.000160746	0.000108636	1.81864e-06	7.57036e-06	9.0601e-06	2.47388e-06
29.8	0.0577129	0.0704757	0.0350714	0.0423771	0.0397014	0.0461514	0.03354	0.0290729		29.8	0.0559	0.0632	0.0441	0.0424	0.0392	0.0477	0.0454	0.0275			0.056	0.063	0.0451	0.0424	0.0396	0.0467	0.0447	0.0273		0.00171286	0.00747571	-0.0100286	-2.28571e-05	0.000101429	-0.000548571	-0.01116	0.00177286		2.93388e-06	5.58863e-05	0.000100572	5.22449e-10	1.02878e-08	3.00931e-07	0.000124546	3.14302e-06
30	0.0571629	0.0693757	0.0327214	0.0320771	0.0371514	0.0449014	0.04099	0.0290729		30	0.0555	0.0628	0.044	0.0421	0.0392	0.0475	0.0454	0.0291			0.0556	0.0627	0.0449	0.0422	0.0395	0.0466	0.0445	0.0252		0.00156286	0.00667571	-0.0121786	-0.0101229	-0.00234857	-0.00169857	-0.00351	0.00387286		2.44252e-06	4.45652e-05	0.000148318	0.000102472	5.51579e-06	2.88514e-06	1.23201e-05	1.4999e-05
30.2	0.0598129	0.0696757	0.0351214	0.0404771	0.0381514	0.0475014	0.03434	0.0280729		30.2	0.0552	0.0625	0.0438	0.0417	0.0391	0.0473	0.0453	0.0307			0.0553	0.0624	0.0447	0.042	0.0393	0.0463	0.0443	0.0248		0.00451286	0.00727571	-0.00957857	-0.00152286	-0.00114857	0.00120143	-0.00996	0.00327286		2.03659e-05	5.2936e-05	9.1749e-05	2.31909e-06	1.31922e-06	1.44343e-06	9.92016e-05	1.07116e-05
30.4	0.0567129	0.0687257	0.0326214	0.0360771	0.0418014	0.0541514	0.03619	0.0295229		30.4	0.0551	0.0623	0.0435	0.0413	0.0389	0.047	0.045	0.0263			0.0551	0.0622	0.0445	0.0417	0.039	0.046	0.0443	0.0275		0.00161286	0.00652571	-0.0118786	-0.00562286	0.00280143	0.00815143	-0.00811	0.00202286		2.60131e-06	4.25849e-05	0.0001411	3.16165e-05	7.848e-06	6.64458e-05	6.57721e-05	4.09195e-06
30.6	0.0592129	0.0690257	0.0331214	0.0354771	0.0393014	0.0527514	0.04159	0.0281229		30.6	0.055	0.0619	0.0432	0.0411	0.0387	0.0469	0.0447	0.0256			0.055	0.0618	0.0443	0.0414	0.0386	0.0458	0.0443	0.0279		0.00421286	0.00722571	-0.0111786	-0.00592286	0.000701429	0.00695143	-0.00271	0.000222857		1.77482e-05	5.22109e-05	0.00012496	3.50802e-05	4.92002e-07	4.83224e-05	7.3441e-06	4.96653e-08
30.8	0.0593129	0.0662757	0.0345714	0.0416271	0.0366014	0.0485514	0.03674	0.0282229		30.8	0.055	0.0614	0.0429	0.0411	0.0385	0.0468	0.0445	0.0277			0.055	0.0613	0.0441	0.0412	0.0384	0.0456	0.0441	0.0244		0.00431286	0.00497571	-0.00952857	0.000427143	-0.00179857	0.00295143	-0.00736	0.00382286		1.86007e-05	2.47577e-05	9.07937e-05	1.82451e-07	3.23486e-06	8.71093e-06	5.41696e-05	1.46142e-05
31	0.0576629	0.0686757	0.0361714	0.0308271	0.0368514	0.0508514	0.04254	0.0309729		31	0.0548	0.0609	0.0428	0.0411	0.0382	0.0468	0.0444	0.0291			0.0548	0.0608	0.0439	0.041	0.0382	0.0456	0.0438	0.0256		0.00286286	0.00787571	-0.00772857	-0.0101729	-0.00134857	0.00525143	-0.00126	0.00537286		8.19595e-06	6.20269e-05	5.97308e-05	0.000103487	1.81864e-06	2.75775e-05	1.5876e-06	2.88676e-05
31.2	0.0590129	0.0677757	0.0331714	0.0380771	0.0413014	0.0503014	0.03159	0.0307729		31.2	0.0544	0.0604	0.0428	0.041	0.0379	0.0466	0.0443	0.0279			0.0544	0.0603	0.0437	0.0408	0.0382	0.0456	0.0437	0.0232		0.00461286	0.00747571	-0.0105286	-0.00272286	0.00310143	0.00470143	-0.01211	0.00757286		2.12785e-05	5.58863e-05	0.000110851	7.41395e-06	9.61886e-06	2.21034e-05	0.000146652	5.73482e-05
31.4	0.0560129	0.0664757	0.0342214	0.0324271	0.0361014	0.0516514	0.03934	0.0298229		31.4	0.0541	0.06	0.0427	0.0407	0.0378	0.0463	0.0442	0.0307			0.0541	0.06	0.0436	0.0408	0.0383	0.0454	0.0437	0.0235		0.00191286	0.00647571	-0.00937857	-0.00837286	-0.00219857	0.00625143	-0.00436	0.00632286		3.65902e-06	4.19349e-05	8.79576e-05	7.01047e-05	4.83372e-06	3.90804e-05	1.90096e-05	3.99785e-05
31.6	0.0582129	0.0661257	0.0313214	0.0349271	0.0338514	0.0475014	0.03374	0.0302229		31.6	0.0538	0.0597	0.0425	0.0403	0.0378	0.046	0.044	0.0306			0.0538	0.0596	0.0435	0.0407	0.0382	0.0451	0.0438	0.0259		0.00441286	0.00652571	-0.0121786	-0.00577286	-0.00434857	0.00240143	-0.01006	0.00432286		1.94733e-05	4.25849e-05	0.000148318	3.33259e-05	1.89101e-05	5.76686e-06	0.000101204	1.86871e-05
31.8	0.0578129	0.0642257	0.0323714	0.0377271	0.0379514	0.0492514	0.03904	0.0291229		31.8	0.0535	0.0594	0.0423	0.04	0.0379	0.0458	0.044	0.0268			0.0535	0.0593	0.0434	0.0405	0.038	0.0449	0.0437	0.0264		0.00431286	0.00492571	-0.0110286	-0.00277286	-4.85714e-05	0.00435143	-0.00466	0.00272286		1.86007e-05	2.42627e-05	0.000121629	7.68874e-06	2.35918e-09	1.89349e-05	2.17156e-05	7.41395e-06
32	0.0564129	0.0685757	0.0314214	0.0340771	0.0396514	0.0489514	0.04124	0.0273229		32	0.0532	0.0592	0.0422	0.0399	0.0379	0.0456	0.0441	0.025			0.0532	0.0591	0.0432	0.0403	0.0377	0.0448	0.0434	0.0281		0.00321286	0.00947571	-0.0117786	-0.00622286	0.00195143	0.00415143	-0.00216	-0.000777143		1.03225e-05	8.97892e-05	0.000138735	3.8724e-05	3.80807e-06	1.72344e-05	4.6656e-06	6.03951e-07
32.2	0.0583129	0.0657757	0.0309714	0.0382771	0.0406014	0.0488014	0.03684	0.0290229		32.2	0.0529	0.0591	0.0422	0.0398	0.0377	0.0456	0.044	0.0291			0.0529	0.059	0.0432	0.0401	0.0375	0.0448	0.043	0.029		0.00541286	0.00677571	-0.0122286	-0.00182286	0.00310143	0.00400143	-0.00616	2.28571e-05		2.9299e-05	4.59103e-05	0.000149538	3.32281e-06	9.61886e-06	1.60114e-05	3.79456e-05	5.22449e-10
32.4	0.0569129	0.0650257	0.0313214	0.0288771	0.0325014	0.0511514	0.03354	0.0290729		32.4	0.0525	0.059	0.042	0.0397	0.0373	0.0457	0.0437	0.0287			0.0525	0.0589	0.0431	0.04	0.0374	0.0447	0.0427	0.0275		0.00441286	0.00612571	-0.0117786	-0.0111229	-0.00489857	0.00645143	-0.00916	0.00157286		1.94733e-05	3.75244e-05	0.000138735	0.000123718	2.3996e-05	4.16209e-05	8.39056e-05	2.47388e-06
32.6	0.0577629	0.0662757	0.0319714	0.0420771	0.0365014	0.0501514	0.03384	0.0298229		32.6	0.0522	0.0589	0.0417	0.0396	0.0369	0.0457	0.0433	0.0247			0.0522	0.0588	0.0429	0.04	0.0374	0.0445	0.0427	0.0257		0.00556286	0.00747571	-0.0109286	0.00207714	-0.000898571	0.00565143	-0.00886	0.00412286		3.09454e-05	5.58863e-05	0.000119434	4.31452e-06	8.07431e-07	3.19386e-05	7.84996e-05	1.6998e-05
32.8	0.0579629	0.0627257	0.0307714	0.0329271	0.0370514	0.0502014	0.03784	0.0305729		32.8	0.0518	0.0587	0.0415	0.0396	0.0368	0.0456	0.043	0.0255			0.0518	0.0586	0.0426	0.04	0.0373	0.0443	0.0428	0.0261		0.00616286	0.00412571	-0.0118286	-0.00707286	-0.000248571	0.00590143	-0.00496	0.00447286		3.79808e-05	1.70215e-05	0.000139915	5.00253e-05	6.17878e-08	3.48269e-05	2.46016e-05	2.00065e-05
33	0.0557629	0.0639757	0.0307214	0.0375771	0.0367014	0.0492514	0.03799	0.0289729		33	0.0516	0.0584	0.0413	0.0397	0.0369	0.0452	0.043	0.0226			0.0516	0.0583	0.0423	0.0398	0.0372	0.0441	0.0427	0.0282		0.00416286	0.00567571	-0.0115786	-0.00222286	-0.000498571	0.00515143	-0.00471	0.000772857		1.73294e-05	3.22137e-05	0.000134063	4.94109e-06	2.48573e-07	2.65372e-05	2.21841e-05	5.97308e-07
33.2	0.0551629	0.0667257	0.0331214	0.0367771	0.0373014	0.0486514	0.03639	0.0289729		33.2	0.0515	0.0581	0.0412	0.0396	0.037	0.0448	0.043	0.0235			0.0515	0.058	0.0421	0.0396	0.037	0.044	0.0425	0.0264		0.00366286	0.00872571	-0.00897857	-0.00282286	0.000301429	0.00465143	-0.00611	0.00257286		1.34165e-05	7.61381e-05	8.06147e-05	7.96852e-06	9.08592e-08	2.16358e-05	3.73321e-05	6.61959e-06
33.4	0.0537129	0.0656257	0.0329714	0.0352771	0.0337014	0.0525014	0.03834	0.0287729		33.4	0.0514	0.0578	0.041	0.0392	0.0368	0.0445	0.0428	0.0259			0.0514	0.0577	0.0419	0.0394	0.0368	0.0438	0.0421	0.0256		0.00231286	0.00792571	-0.00892857	-0.00412286	-0.00309857	0.00870143	-0.00376	0.00317286		5.34931e-06	6.28169e-05	7.97194e-05	1.6998e-05	9.60114e-06	7.57149e-05	1.41376e-05	1.0067e-05
33.6	0.0567129	0.0643757	0.0333214	0.0377271	0.0359014	0.0474014	0.03364	0.0300729		33.6	0.0513	0.0575	0.0407	0.0388	0.0365	0.0444	0.0424	0.0261			0.0513	0.0574	0.0418	0.0391	0.0365	0.0436	0.0418	0.0273		0.00541286	0.00697571	-0.00847857	-0.00137286	-0.000598571	0.00380143	-0.00816	0.00277286		2.9299e-05	4.86606e-05	7.18862e-05	1.88474e-06	3.58288e-07	1.44509e-05	6.65856e-05	7.68874e-06
33.8	0.0554629	0.0629257	0.0298214	0.0332771	0.0369014	0.0482014	0.03604	0.0310229		33.8	0.0512	0.0572	0.0404	0.0384	0.0361	0.0443	0.042	0.0283			0.0512	0.0572	0.0416	0.0389	0.0363	0.0434	0.0416	0.0278		0.00426286	0.00572571	-0.0117786	-0.00562286	0.000601429	0.00480143	-0.00556	0.00322286		1.8172e-05	3.27838e-05	0.000138735	3.16165e-05	3.61716e-07	2.30537e-05	3.09136e-05	1.03868e-05
34	0.0541629	0.0652757	0.0299714	0.0355771	0.0382514	0.0497514	0.03684	0.0307729		34	0.051	0.057	0.0403	0.0384	0.0358	0.0442	0.0419	0.0247			0.0511	0.0569	0.0415	0.0388	0.0361	0.0433	0.0415	0.0253		0.00306286	0.00837571	-0.0115286	-0.00322286	0.00215143	0.00645143	-0.00466	0.00547286		9.38109e-06	7.01526e-05	0.000132908	1.03868e-05	4.62864e-06	4.16209e-05	2.17156e-05	2.99522e-05
34.2	0.0551629	0.0636257	0.0301714	0.0309271	0.0388514	0.0450014	0.03794	0.0307229		34.2	0.0508	0.0567	0.0403	0.0385	0.0356	0.0439	0.042	0.0248			0.0508	0.0567	0.0414	0.0386	0.0359	0.0431	0.0415	0.0248		0.00436286	0.00692571	-0.0112286	-0.00767286	0.00295143	0.00190143	-0.00356	0.00592286		1.90345e-05	4.79655e-05	0.000126081	5.88727e-05	8.71093e-06	3.61543e-06	1.26736e-05	3.50802e-05
34.4	0.0548629	0.0655757	0.0303714	0.0374271	0.0374014	0.0445014	0.03374	0.0291229		34.4	0.0505	0.0566	0.0404	0.0384	0.0355	0.0436	0.0421	0.0259			0.0506	0.0565	0.0413	0.0384	0.0357	0.0429	0.0415	0.0264		0.00426286	0.00907571	-0.0109286	-0.000972857	0.00170143	0.00160143	-0.00776	0.00272286		1.8172e-05	8.23686e-05	0.000119434	9.46451e-07	2.89486e-06	2.56457e-06	6.02176e-05	7.41395e-06
34.6	0.0550129	0.0631757	0.0311214	0.0326271	0.0372514	0.0447514	0.03194	0.0299729		34.6	0.0503	0.0566	0.0402	0.0382	0.0353	0.0435	0.0419	0.027			0.0504	0.0564	0.0413	0.0383	0.0357	0.0427	0.0415	0.0252		0.00461286	0.00677571	-0.0101786	-0.00567286	0.00155143	0.00205143	-0.00956	0.00477286		2.12785e-05	4.59103e-05	0.000103603	3.21813e-05	2.40693e-06	4.20836e-06	9.13936e-05	2.27802e-05
34.8	0.0531629	0.0652257	0.0308714	0.0383271	0.0377014	0.0539514	0.03489	0.0282729		34.8	0.0502	0.0566	0.0401	0.0379	0.0352	0.0435	0.0416	0.0236			0.0503	0.0565	0.0412	0.0382	0.0357	0.0426	0.0414	0.0245		0.00286286	0.00872571	-0.0103286	0.000127143	0.00200143	0.0113514	-0.00651	0.00377286		8.19595e-06	7.61381e-05	0.000106679	1.61653e-08	4.00572e-06	0.000128855	4.23801e-05	1.42345e-05
35	0.0545629	0.0678257	0.0329714	0.0346771	0.0368514	0.0467514	0.03669	0.0280729		35	0.0503	0.0567	0.04	0.0376	0.0352	0.0434	0.0412	0.0257			0.0503	0.0566	0.0411	0.038	0.0357	0.0424	0.0412	0.0263		0.00426286	0.0112257	-0.00812857	-0.00332286	0.00115143	0.00435143	-0.00451	0.00177286		1.8172e-05	0.000126017	6.60737e-05	1.10414e-05	1.32579e-06	1.89349e-05	2.03401e-05	3.14302e-06
35.2	0.0557629	0.0626757	0.0309214	0.0354271	0.0386014	0.0455014	0.03559	0.0256229		35.2	0.0503	0.0569	0.04	0.0375	0.0352	0.0432	0.041	0.0251			0.0503	0.0568	0.041	0.0379	0.0356	0.0424	0.0409	0.0266		0.00546286	0.00587571	-0.0100786	-0.00247286	0.00300143	0.00310143	-0.00531	-0.000977143		2.98428e-05	3.4524e-05	0.000101578	6.11502e-06	9.00857e-06	9.61886e-06	2.81961e-05	9.54808e-07
35.4	0.0536629	0.0619257	0.0350214	0.0398771	0.0375514	0.0432014	0.03454	0.0277229		35.4	0.0503	0.0569	0.04	0.0375	0.0353	0.0431	0.0412	0.0222			0.0503	0.0568	0.0409	0.0379	0.0354	0.0425	0.0406	0.0254		0.00336286	0.00512571	-0.00587857	0.00197714	0.00215143	0.000701429	-0.00606	0.00232286		1.13088e-05	2.62729e-05	3.45576e-05	3.90909e-06	4.62864e-06	4.92002e-07	3.67236e-05	5.39567e-06
35.6	0.0517629	0.0679257	0.0303214	0.0339271	0.0410514	0.0460514	0.03469	0.0288729		35.6	0.0504	0.0568	0.0399	0.0375	0.0352	0.0431	0.0414	0.025			0.0504	0.0567	0.0409	0.0379	0.0352	0.0426	0.0405	0.0258		0.00136286	0.0112257	-0.0105786	-0.00397286	0.00585143	0.00345143	-0.00581	0.00307286		1.85738e-06	0.000126017	0.000111906	1.57836e-05	3.42392e-05	1.19124e-05	3.37561e-05	9.44245e-06
35.8	0.0495129	0.0627757	0.0331714	0.0349271	0.0406514	0.0483514	0.03474	0.0283229		35.8	0.0502	0.0565	0.0398	0.0375	0.0349	0.0433	0.0414	0.0272			0.0502	0.0564	0.0409	0.0379	0.0351	0.0425	0.0405	0.0255		-0.000687143	0.00637571	-0.00772857	-0.00297286	0.00555143	0.00585143	-0.00576	0.00282286		4.72165e-07	4.06497e-05	5.97308e-05	8.83788e-06	3.08184e-05	3.42392e-05	3.31776e-05	7.96852e-06
36	0.0513129	0.0647257	0.0341714	0.0306271	0.0381014	0.0537514	0.03324	0.0252729		36	0.0499	0.056	0.0395	0.0375	0.0346	0.0435	0.0411	0.0249			0.0499	0.056	0.0407	0.0379	0.035	0.0424	0.0405	0.0237		0.00141286	0.00872571	-0.00652857	-0.00727286	0.00310143	0.0113514	-0.00726	0.00157286		1.99617e-06	7.61381e-05	4.26222e-05	5.28945e-05	9.61886e-06	0.000128855	5.27076e-05	2.47388e-06
36.2	0.0516629	0.0636257	0.0324214	0.0356271	0.0345014	0.0519514	0.03644	0.0281229		36.2	0.0496	0.0556	0.0394	0.0374	0.0345	0.0433	0.0408	0.022			0.0496	0.0555	0.0405	0.0378	0.035	0.0422	0.0404	0.0248		0.00206286	0.00812571	-0.00807857	-0.00217286	-0.000498571	0.00975143	-0.00396	0.00332286		4.25538e-06	6.60272e-05	6.52633e-05	4.72131e-06	2.48573e-07	9.50904e-05	1.56816e-05	1.10414e-05
36.4	0.0511629	0.0647757	0.0313714	0.0320771	0.0333514	0.0427514	0.03569	0.0279229		36.4	0.0492	0.0551	0.0393	0.0374	0.0345	0.0429	0.0405	0.0246			0.0493	0.0551	0.0402	0.0376	0.0349	0.0419	0.0403	0.0268		0.00186286	0.00967571	-0.00882857	-0.00552286	-0.00154857	0.000851429	-0.00461	0.00112286		3.47024e-06	9.36194e-05	7.79437e-05	3.0502e-05	2.39807e-06	7.24931e-07	2.12521e-05	1.26081e-06
36.6	0.0540129	0.0656257	0.0291214	0.0359771	0.0377514	0.0467514	0.03684	0.0275229		36.6	0.0489	0.0549	0.0391	0.0372	0.0344	0.0426	0.0403	0.0249			0.0489	0.0548	0.04	0.0374	0.0347	0.0417	0.0402	0.0235		0.00511286	0.0108257	-0.0108786	-0.00142286	0.00305143	0.00505143	-0.00336	0.00402286		2.61413e-05	0.000117196	0.000118343	2.02452e-06	9.31122e-06	2.55169e-05	1.12896e-05	1.61834e-05
36.8	0.0527629	0.0627257	0.0317214	0.0354771	0.0379514	0.0501514	0.03554	0.0256229		36.8	0.0486	0.0547	0.0389	0.037	0.0342	0.0423	0.0404	0.0236			0.0487	0.0546	0.0399	0.0372	0.0345	0.0416	0.04	0.0254		0.00406286	0.00812571	-0.00817857	-0.00172286	0.00345143	0.00855143	-0.00446	0.000222857		1.65068e-05	6.60272e-05	6.6889e-05	2.96824e-06	1.19124e-05	7.31269e-05	1.98916e-05	4.96653e-08
37	0.0525629	0.0611257	0.0303214	0.0297771	0.0395514	0.0487014	0.03369	0.0268229		37	0.0486	0.0546	0.0387	0.0366	0.0339	0.0421	0.0404	0.0243			0.0487	0.0545	0.0397	0.0369	0.0343	0.0414	0.0398	0.0252		0.00386286	0.00662571	-0.00937857	-0.00712286	0.00525143	0.00730143	-0.00611	0.00162286		1.49217e-05	4.39001e-05	8.79576e-05	5.07351e-05	2.75775e-05	5.33109e-05	3.73321e-05	2.63367e-06
37.2	0.0549629	0.0626757	0.0289214	0.0399271	0.0336514	0.0474514	0.03389	0.0290729		37.2	0.0485	0.0546	0.0385	0.0363	0.0336	0.0418	0.0401	0.0259			0.0486	0.0545	0.0396	0.0367	0.0341	0.0412	0.0396	0.0234		0.00636286	0.00817571	-0.0106786	0.00322714	-0.000448571	0.00625143	-0.00571	0.00567286		4.0486e-05	6.68423e-05	0.000114032	1.04145e-05	2.01216e-07	3.90804e-05	3.26041e-05	3.21813e-05
37.4	0.0527129	0.0641257	0.0289214	0.0313271	0.0328014	0.0444514	0.03289	0.0293229		37.4	0.0484	0.0546	0.0384	0.0362	0.0335	0.0416	0.0397	0.026			0.0485	0.0545	0.0395	0.0366	0.0339	0.0411	0.0394	0.0235		0.00421286	0.00962571	-0.0105786	-0.00527286	-0.00109857	0.00335143	-0.00651	0.00582286		1.77482e-05	9.26544e-05	0.000111906	2.7803e-05	1.20686e-06	1.12321e-05	4.23801e-05	3.39057e-05
37.6	0.0521629	0.0658257	0.0278714	0.0349771	0.0351514	0.0478014	0.03574	0.0255729		37.6	0.0484	0.0546	0.0384	0.0362	0.0335	0.0416	0.0394	0.0201			0.0485	0.0545	0.0394	0.0365	0.0339	0.041	0.0393	0.0247		0.00366286	0.0113257	-0.0115286	-0.00152286	0.00125143	0.00680143	-0.00356	0.000872857		1.34165e-05	0.000128272	0.000132908	2.31909e-06	1.56607e-06	4.62594e-05	1.26736e-05	7.6188e-07
37.8	0.0523629	0.0648757	0.0281714	0.0354271	0.0347514	0.0482014	0.02984	0.0270229		37.8	0.0483	0.0545	0.0385	0.0362	0.0336	0.0418	0.0396	0.0235			0.0484	0.0544	0.0395	0.0365	0.0339	0.0409	0.0394	0.0263		0.00396286	0.0104757	-0.0113286	-0.00107286	0.000851429	0.00730143	-0.00956	0.000722857		1.57042e-05	0.000109741	0.000128337	1.15102e-06	7.24931e-07	5.33109e-05	9.13936e-05	5.22522e-07
38	0.0523129	0.0597757	0.0307214	0.0312271	0.0330014	0.0491014	0.03324	0.0269229		38	0.0483	0.0543	0.0386	0.0362	0.0335	0.0419	0.0398	0.0248			0.0483	0.0542	0.0395	0.0364	0.0338	0.0408	0.0394	0.0241		0.00401286	0.00557571	-0.00877857	-0.00517286	-0.000798571	0.00830143	-0.00616	0.00282286		1.6103e-05	3.10886e-05	7.70633e-05	2.67585e-05	6.37716e-07	6.89137e-05	3.79456e-05	7.96852e-06
38.2	0.0518629	0.0624757	0.0325214	0.0364771	0.0344514	0.0449514	0.03274	0.0275229		38.2	0.0481	0.054	0.0384	0.0361	0.0334	0.0418	0.0398	0.0214			0.0481	0.0539	0.0394	0.0363	0.0338	0.0408	0.0394	0.0238		0.00376286	0.00857571	-0.00687857	0.000177143	0.000651429	0.00415143	-0.00666	0.00372286		1.41591e-05	7.35429e-05	4.73147e-05	3.13796e-08	4.24359e-07	1.72344e-05	4.43556e-05	1.38597e-05
38.4	0.0513629	0.0618257	0.0311714	0.0320271	0.0362514	0.0450514	0.03429	0.0299229		38.4	0.0479	0.0537	0.0382	0.0358	0.0332	0.0415	0.0394	0.0231			0.048	0.0537	0.0393	0.0362	0.0336	0.0407	0.0392	0.0234		0.00336286	0.00812571	-0.00812857	-0.00417286	0.00265143	0.00435143	-0.00491	0.00652286		1.13088e-05	6.60272e-05	6.60737e-05	1.74127e-05	7.03007e-06	1.89349e-05	2.41081e-05	4.25477e-05
38.6	0.0512129	0.0631257	0.0299214	0.0336771	0.0388014	0.0462514	0.03479	0.0286229		38.6	0.0477	0.0535	0.0381	0.0357	0.0331	0.0413	0.039	0.0245			0.0478	0.0534	0.0391	0.0361	0.0335	0.0406	0.039	0.0233		0.00341286	0.00972571	-0.00917857	-0.00242286	0.00530143	0.00565143	-0.00421	0.00532286		1.16476e-05	9.45895e-05	8.42462e-05	5.87024e-06	2.81051e-05	3.19386e-05	1.77241e-05	2.83328e-05
38.8	0.0496629	0.0630757	0.0321714	0.0331771	0.0388514	0.0469014	0.02974	0.0293229		38.8	0.0475	0.0532	0.038	0.0356	0.0331	0.0411	0.0389	0.0245			0.0475	0.0532	0.0389	0.036	0.0333	0.0405	0.0388	0.0237		0.00216286	0.00987571	-0.00672857	-0.00282286	0.00555143	0.00640143	-0.00906	0.00562286		4.67795e-06	9.75297e-05	4.52737e-05	7.96852e-06	3.08184e-05	4.09783e-05	8.20836e-05	3.16165e-05
39	0.0498629	0.0628257	0.0314214	0.0330771	0.0350014	0.0460514	0.04094	0.0281229		39	0.0473	0.053	0.0379	0.0355	0.0329	0.041	0.0391	0.0223			0.0473	0.0529	0.0388	0.0359	0.0331	0.0403	0.0387	0.0251		0.00256286	0.00992571	-0.00737857	-0.00282286	0.00190143	0.00575143	0.00224	0.00302286		6.56824e-06	9.85198e-05	5.44433e-05	7.96852e-06	3.61543e-06	3.30789e-05	5.0176e-06	9.13767e-06
39.2	0.0486629	0.0612257	0.0295714	0.0327771	0.0369514	0.0438014	0.02899	0.0265729		39.2	0.0471	0.0527	0.0377	0.0355	0.0327	0.0409	0.0392	0.0244			0.0471	0.0527	0.0387	0.0358	0.033	0.0401	0.0385	0.026		0.00156286	0.00852571	-0.00912857	-0.00302286	0.00395143	0.00370143	-0.00951	0.000572857		2.44252e-06	7.26878e-05	8.33308e-05	9.13767e-06	1.56138e-05	1.37006e-05	9.04401e-05	3.28165e-07
39.4	0.0514629	0.0609757	0.0294714	0.0283271	0.0346014	0.0466014	0.03264	0.0277229		39.4	0.0468	0.0526	0.0375	0.0353	0.0324	0.0407	0.039	0.0263			0.0469	0.0525	0.0386	0.0356	0.0329	0.04	0.0384	0.0225		0.00456286	0.00847571	-0.00912857	-0.00727286	0.00170143	0.00660143	-0.00576	0.00522286		2.08197e-05	7.18377e-05	8.33308e-05	5.28945e-05	2.89486e-06	4.35789e-05	3.31776e-05	2.72782e-05
39.6	0.0513129	0.0649757	0.0311214	0.0360771	0.0328014	0.0461014	0.02884	0.0253229		39.6	0.0466	0.0525	0.0374	0.0352	0.0323	0.0405	0.0387	0.024			0.0466	0.0525	0.0384	0.0355	0.0329	0.0398	0.0383	0.0232		0.00471286	0.0124757	-0.00727857	0.000577143	-9.85714e-05	0.00630143	-0.00946	0.00212286		2.2211e-05	0.000155643	5.29776e-05	3.33094e-07	9.71633e-09	3.9708e-05	8.94916e-05	4.50652e-06
39.8	0.0522629	0.0593257	0.0288714	0.0292771	0.0308014	0.0430514	0.03239	0.0275729		39.8	0.0464	0.0526	0.0374	0.035	0.0323	0.0405	0.0384	0.0206			0.0465	0.0525	0.0383	0.0354	0.0329	0.0397	0.0383	0.024		0.00576286	0.00682571	-0.00942857	-0.00612286	-0.00209857	0.00335143	-0.00591	0.00357286		3.32105e-05	4.65904e-05	8.8898e-05	3.74894e-05	4.404e-06	1.12321e-05	3.49281e-05	1.27653e-05
40	0.0506129	0.0638257	0.0299214	0.0319771	0.0334014	0.0424014	0.03339	0.0261229		40	0.0465	0.0527	0.0375	0.035	0.0323	0.0405	0.0382	0.023			0.0466	0.0526	0.0383	0.0353	0.0328	0.0397	0.0382	0.0247		0.00401286	0.0112257	-0.00837857	-0.00332286	0.000601429	0.00270143	-0.00481	0.00142286		1.6103e-05	0.000126017	7.02005e-05	1.10414e-05	3.61716e-07	7.29772e-06	2.31361e-05	2.02452e-06
40.2	0.0487629	0.0625257	0.0305714	0.0319271	0.0348514	0.0427514	0.03199	0.0269229		40.2	0.0467	0.0528	0.0374	0.0349	0.0322	0.0404	0.0382	0.0252			0.0467	0.0528	0.0382	0.0351	0.0326	0.0397	0.038	0.0227		0.00206286	0.00972571	-0.00762857	-0.00317286	0.00225143	0.00305143	-0.00601	0.00422286		4.25538e-06	9.45895e-05	5.81951e-05	1.0067e-05	5.06893e-06	9.31122e-06	3.61201e-05	1.78325e-05
40.4	0.0516629	0.0630757	0.0273714	0.0303771	0.0363514	0.0476514	0.03319	0.0279229		40.4	0.0468	0.053	0.0372	0.0348	0.0321	0.0402	0.0382	0.0239			0.0468	0.0529	0.0381	0.035	0.0324	0.0397	0.0379	0.0233		0.00486286	0.0101757	-0.0107286	-0.00462286	0.00395143	0.00795143	-0.00471	0.00462286		2.36474e-05	0.000103545	0.000115102	2.13708e-05	1.56138e-05	6.32252e-05	2.21841e-05	2.13708e-05
40.6	0.0490629	0.0622757	0.0303214	0.0348271	0.0328514	0.0401014	0.02919	0.0247229		40.6	0.047	0.0529	0.0371	0.0347	0.0319	0.0401	0.0381	0.0221			0.047	0.0529	0.0381	0.0349	0.0322	0.0396	0.0377	0.0245		0.00206286	0.00937571	-0.00777857	-7.28571e-05	0.000651429	0.000501429	-0.00851	0.000222857		4.25538e-06	8.7904e-05	6.05062e-05	5.30816e-09	4.24359e-07	2.51431e-07	7.24201e-05	4.96653e-08
40.8	0.0503629	0.0608257	0.0292214	0.0303271	0.0356514	0.0465514	0.03184	0.0254229		40.8	0.047	0.0527	0.037	0.0346	0.0319	0.0402	0.0379	0.0236			0.047	0.0526	0.038	0.0349	0.0322	0.0396	0.0376	0.0236		0.00336286	0.00822571	-0.00877857	-0.00457286	0.00345143	0.00695143	-0.00576	0.00182286		1.13088e-05	6.76624e-05	7.70633e-05	2.0911e-05	1.19124e-05	4.83224e-05	3.31776e-05	3.32281e-06
41	0.0490129	0.0596757	0.0309714	0.0320271	0.0339514	0.0429014	0.02929	0.0256229		41	0.0469	0.0525	0.037	0.0346	0.0319	0.0404	0.0379	0.0244			0.0469	0.0524	0.038	0.035	0.0322	0.0395	0.0376	0.0231		0.00211286	0.00727571	-0.00702857	-0.00297286	0.00175143	0.00340143	-0.00831	0.00252286		4.46417e-06	5.2936e-05	4.94008e-05	8.83788e-06	3.0675e-06	1.15697e-05	6.90561e-05	6.36481e-06
41.2	0.0494129	0.0617757	0.0306214	0.0294271	0.0345014	0.0454514	0.03449	0.0285229		41.2	0.0467	0.0522	0.0371	0.0346	0.0319	0.0405	0.0381	0.0201			0.0467	0.0521	0.038	0.035	0.0323	0.0394	0.0377	0.0246		0.00271286	0.00967571	-0.00737857	-0.00557286	0.00220143	0.00605143	-0.00321	0.00392286		7.35959e-06	9.36194e-05	5.44433e-05	3.10567e-05	4.84629e-06	3.66198e-05	1.03041e-05	1.53888e-05
41.4	0.0504129	0.0595757	0.0294714	0.0307771	0.0358514	0.0458014	0.03064	0.0252729		41.4	0.0464	0.0518	0.0371	0.0347	0.032	0.0403	0.0383	0.022			0.0464	0.0517	0.0379	0.0349	0.0323	0.0393	0.0379	0.0257		0.00401286	0.00787571	-0.00842857	-0.00412286	0.00355143	0.00650143	-0.00726	-0.000427143		1.6103e-05	6.20269e-05	7.10408e-05	1.6998e-05	1.26126e-05	4.22686e-05	5.27076e-05	1.82451e-07
41.6	0.0482129	0.0614257	0.0266714	0.0315771	0.0367014	0.0417014	0.03189	0.0243229		41.6	0.046	0.0515	0.0369	0.0347	0.0319	0.04	0.0383	0.0243			0.046	0.0514	0.0378	0.0348	0.0322	0.0392	0.0379	0.0218		0.00221286	0.0100257	-0.0111286	-0.00322286	0.00450143	0.00250143	-0.00601	0.00252286		4.89674e-06	0.000100515	0.000123845	1.03868e-05	2.02629e-05	6.25714e-06	3.61201e-05	6.36481e-06
41.8	0.0491129	0.0576257	0.0272714	0.0327771	0.0367014	0.0449014	0.03069	0.0259229		41.8	0.0456	0.0512	0.0367	0.0346	0.0317	0.0398	0.0381	0.0247			0.0457	0.0512	0.0376	0.0347	0.0321	0.0391	0.0378	0.0227		0.00341286	0.00642571	-0.0103286	-0.00192286	0.00460143	0.00580143	-0.00711	0.00322286		1.16476e-05	4.12898e-05	0.000106679	3.69738e-06	2.11731e-05	3.36566e-05	5.05521e-05	1.03868e-05
42	0.0467629	0.0611257	0.0289714	0.0306271	0.0369514	0.0461014	0.03074	0.0266229		42	0.0454	0.051	0.0365	0.0342	0.0316	0.0397	0.0378	0.0197			0.0454	0.0509	0.0374	0.0345	0.0319	0.0389	0.0375	0.023		0.00136286	0.0102257	-0.00842857	-0.00387286	0.00505143	0.00720143	-0.00676	0.00362286		1.85738e-06	0.000104565	7.10408e-05	1.4999e-05	2.55169e-05	5.18606e-05	4.56976e-05	1.31251e-05
42.2	0.0496629	0.0588257	0.0280214	0.0305271	0.0362014	0.0452514	0.03129	0.0245729		42.2	0.0452	0.0508	0.0364	0.0339	0.0314	0.0396	0.0375	0.0221			0.0453	0.0507	0.0372	0.0343	0.0317	0.0388	0.0371	0.0233		0.00436286	0.00812571	-0.00917857	-0.00377286	0.00450143	0.00645143	-0.00581	0.00127286		1.90345e-05	6.60272e-05	8.42462e-05	1.42345e-05	2.02629e-05	4.16209e-05	3.37561e-05	1.62017e-06
42.4	0.0474629	0.0618757	0.0287214	0.0317271	0.0356514	0.0414014	0.02929	0.0246229		42.4	0.0452	0.0507	0.0364	0.0337	0.0312	0.0395	0.0373	0.0238			0.0452	0.0506	0.0371	0.0341	0.0315	0.0387	0.0369	0.0224		0.00226286	0.0112757	-0.00837857	-0.00237286	0.00415143	0.00270143	-0.00761	0.00222286		5.12052e-06	0.000127142	7.02005e-05	5.63045e-06	1.72344e-05	7.29772e-06	5.79121e-05	4.94109e-06
42.6	0.0486629	0.0567257	0.0305714	0.0273771	0.0321514	0.0415514	0.03214	0.0245229		42.6	0.0451	0.0505	0.0362	0.0336	0.0311	0.0392	0.0372	0.0222			0.0451	0.0505	0.037	0.0339	0.0313	0.0386	0.0368	0.023		0.00356286	0.00622571	-0.00642857	-0.00652286	0.000851429	0.00295143	-0.00466	0.00152286		1.2694e-05	3.87595e-05	4.13265e-05	4.25477e-05	7.24931e-07	8.71093e-06	2.17156e-05	2.31909e-06
42.8	0.0461129	0.0598257	0.0276214	0.0344271	0.0323514	0.0472014	0.02909	0.0240729		42.8	0.045	0.0503	0.036	0.0336	0.031	0.0391	0.0372	0.0215			0.045	0.0503	0.0369	0.0338	0.0312	0.0385	0.0367	0.0232		0.00111286	0.00952571	-0.00927857	0.000627143	0.00115143	0.00870143	-0.00761	0.000872857		1.23845e-06	9.07392e-05	8.60919e-05	3.93308e-07	1.32579e-06	7.57149e-05	5.79121e-05	7.6188e-07
43	0.0459129	0.0586257	0.0279714	0.0283271	0.0356514	0.0450514	0.02839	0.0246229		43	0.0448	0.0501	0.0359	0.0335	0.0308	0.039	0.0372	0.023			0.0449	0.0501	0.0368	0.0337	0.0311	0.0383	0.0367	0.0234		0.00101286	0.00852571	-0.00882857	-0.00537286	0.00455143	0.00675143	-0.00831	0.00122286		1.02588e-06	7.26878e-05	7.79437e-05	2.88676e-05	2.07155e-05	4.55818e-05	6.90561e-05	1.49538e-06
43.2	0.0473129	0.0589257	0.0271714	0.0285271	0.0331514	0.0428514	0.02789	0.0226729		43.2	0.0446	0.0498	0.0358	0.0334	0.0306	0.0391	0.0371	0.0242			0.0447	0.0498	0.0368	0.0337	0.0311	0.0382	0.0367	0.021		0.00261286	0.00912571	-0.00962857	-0.00517286	0.00205143	0.00465143	-0.00881	0.00167286		6.82702e-06	8.32787e-05	9.27094e-05	2.67585e-05	4.20836e-06	2.16358e-05	7.76161e-05	2.79845e-06
43.4	0.0485629	0.0584257	0.0314714	0.0324771	0.0332514	0.0459514	0.03494	0.0271729		43.4	0.0444	0.0495	0.0359	0.0332	0.0305	0.0391	0.0369	0.0215			0.0445	0.0495	0.0367	0.0337	0.031	0.0381	0.0366	0.0224		0.00406286	0.00892571	-0.00522857	-0.00122286	0.00225143	0.00785143	-0.00166	0.00477286		1.65068e-05	7.96684e-05	2.7338e-05	1.49538e-06	5.06893e-06	6.16449e-05	2.7556e-06	2.27802e-05
43.6	0.0456129	0.0577257	0.0275714	0.0292771	0.0324514	0.0452014	0.02939	0.0260729		43.6	0.0442	0.0493	0.0358	0.0332	0.0304	0.0389	0.0367	0.0208			0.0443	0.0493	0.0366	0.0336	0.0308	0.038	0.0363	0.0246		0.00131286	0.00842571	-0.00902857	-0.00432286	0.00165143	0.00720143	-0.00691	0.00147286		1.72359e-06	7.09927e-05	8.15151e-05	1.86871e-05	2.72722e-06	5.18606e-05	4.77481e-05	2.16931e-06
43.8	0.0480629	0.0585757	0.0268714	0.0309271	0.0306514	0.0487014	0.02849	0.0252229		43.8	0.044	0.0492	0.0357	0.0332	0.0304	0.0385	0.0365	0.0217			0.044	0.0492	0.0365	0.0335	0.0307	0.0379	0.0361	0.0231		0.00406286	0.00937571	-0.00962857	-0.00257286	-4.85714e-05	0.0108014	-0.00761	0.00212286		1.65068e-05	8.7904e-05	9.27094e-05	6.61959e-06	2.35918e-09	0.000116671	5.79121e-05	4.50652e-06
44	0.0465629	0.0583257	0.0288214	0.0262771	0.0333014	0.0491514	0.03434	0.0224729		44	0.0439	0.0491	0.0355	0.0331	0.0304	0.0382	0.0363	0.023			0.0439	0.0491	0.0364	0.0333	0.0305	0.0378	0.0359	0.0223		0.00266286	0.00922571	-0.00757857	-0.00702286	0.00280143	0.0113514	-0.00156	0.000172857		7.09081e-06	8.51138e-05	5.74347e-05	4.93205e-05	7.848e-06	0.000128855	2.4336e-06	2.98796e-08
44.2	0.0467629	0.0595257	0.0273214	0.0303271	0.0293514	0.0465014	0.02574	0.0225729		44.2	0.0438	0.0492	0.0354	0.0329	0.0302	0.0381	0.0362	0.0242			0.0439	0.0491	0.0363	0.0331	0.0304	0.0375	0.0357	0.0229		0.00286286	0.0104257	-0.00897857	-0.00277286	-0.00104857	0.00900143	-0.00996	-0.000327143		8.19595e-06	0.000108696	8.06147e-05	7.68874e-06	1.0995e-06	8.10257e-05	9.92016e-05	1.07022e-07
44.4	0.0488129	0.0557257	0.0312714	0.0274271	0.0353514	0.0419514	0.03114	0.0243229		44.4	0.0437	0.0493	0.0353	0.0327	0.0299	0.0381	0.0361	0.0225			0.0438	0.0492	0.0362	0.033	0.0303	0.0373	0.0357	0.0242		0.00501286	0.00652571	-0.00492857	-0.00557286	0.00505143	0.00465143	-0.00456	0.000122857		2.51287e-05	4.25849e-05	2.42908e-05	3.10567e-05	2.55169e-05	2.16358e-05	2.07936e-05	1.50939e-08
44.6	0.0465629	0.0572257	0.0300214	0.0321771	0.0320514	0.0461014	0.02649	0.0241729		44.6	0.0437	0.0492	0.0354	0.0325	0.0297	0.0381	0.036	0.0196			0.0437	0.0491	0.0361	0.033	0.0303	0.0372	0.0358	0.0226		0.00286286	0.00812571	-0.00607857	-0.000822857	0.00175143	0.00890143	-0.00931	0.00157286		8.19595e-06	6.60272e-05	3.6949e-05	6.77094e-07	3.0675e-06	7.92354e-05	8.66761e-05	2.47388e-06
44.8	0.0478629	0.0608757	0.0291214	0.0306771	0.0334514	0.0487014	0.03209	0.0272729		44.8	0.0436	0.0491	0.0354	0.0325	0.0297	0.0379	0.036	0.0222			0.0436	0.049	0.0361	0.0329	0.0303	0.0372	0.0359	0.0222		0.00426286	0.0118757	-0.00697857	-0.00222286	0.00315143	0.0115014	-0.00381	0.00507286		1.8172e-05	0.000141033	4.87005e-05	4.94109e-06	9.9315e-06	0.000132283	1.45161e-05	2.57339e-05
45	0.0458129	0.0612757	0.0294714	0.0255271	0.0277514	0.0466014	0.02974	0.0239229		45	0.0434	0.0489	0.0353	0.0326	0.0298	0.0378	0.036	0.0233			0.0434	0.0488	0.0361	0.0329	0.0303	0.0372	0.0359	0.0219		0.00241286	0.0124757	-0.00662857	-0.00737286	-0.00254857	0.00940143	-0.00616	0.00202286		5.82188e-06	0.000155643	4.3938e-05	5.4359e-05	6.49522e-06	8.83869e-05	3.79456e-05	4.09195e-06
45.2	0.0457129	0.0605757	0.0289714	0.0309271	0.0320514	0.0399514	0.02794	0.0267729		45.2	0.0433	0.0486	0.0351	0.0327	0.0299	0.0378	0.036	0.0223			0.0433	0.0486	0.036	0.0328	0.0302	0.0373	0.0358	0.0219		0.00241286	0.0119757	-0.00702857	-0.00187286	0.00185143	0.00265143	-0.00786	0.00487286		5.82188e-06	0.000143418	4.94008e-05	3.50759e-06	3.42779e-06	7.03007e-06	6.17796e-05	2.37447e-05
45.4	0.0478129	0.0573257	0.0303714	0.0265271	0.0309014	0.0453014	0.03009	0.0255729		45.4	0.0431	0.0483	0.035	0.0325	0.0299	0.0379	0.036	0.0209			0.0431	0.0483	0.0359	0.0327	0.0301	0.0372	0.0356	0.0205		0.00471286	0.00902571	-0.00552857	-0.00617286	0.000801429	0.00810143	-0.00551	0.00507286		2.2211e-05	8.14635e-05	3.05651e-05	3.81042e-05	6.42288e-07	6.56331e-05	3.03601e-05	2.57339e-05
45.6	0.0465629	0.0601757	0.0276214	0.0290271	0.0342014	0.0484514	0.03014	0.0235729		45.6	0.0429	0.0479	0.0349	0.0323	0.0297	0.038	0.0358	0.0226			0.043	0.0479	0.0357	0.0326	0.03	0.0371	0.0354	0.0216		0.00356286	0.0122757	-0.00807857	-0.00357286	0.00420143	0.0113514	-0.00526	0.00197286		1.2694e-05	0.000150693	6.52633e-05	1.27653e-05	1.7652e-05	0.000128855	2.76676e-05	3.89217e-06
45.8	0.0457129	0.0547757	0.0292214	0.0316271	0.0346514	0.0436514	0.02954	0.0258229		45.8	0.0428	0.0475	0.0348	0.032	0.0294	0.0379	0.0356	0.0233			0.0428	0.0475	0.0355	0.0324	0.0298	0.037	0.0352	0.0229		0.00291286	0.00727571	-0.00627857	-0.000772857	0.00485143	0.00665143	-0.00566	0.00292286		8.48474e-06	5.2936e-05	3.94205e-05	5.97308e-07	2.35364e-05	4.42415e-05	3.20356e-05	8.54309e-06
46	0.0483129	0.0565257	0.0274214	0.0275271	0.0301514	0.0417514	0.03054	0.0260729		46	0.0426	0.0471	0.0346	0.0318	0.0293	0.0375	0.0354	0.0188			0.0426	0.0471	0.0353	0.0322	0.0297	0.0368	0.0351	0.0239		0.00571286	0.00942571	-0.00787857	-0.00467286	0.000451429	0.00495143	-0.00456	0.00217286		3.26367e-05	8.88441e-05	6.20719e-05	2.18356e-05	2.03788e-07	2.45166e-05	2.07936e-05	4.72131e-06
46.2	0.0469629	0.0621757	0.0286714	0.0270271	0.0349014	0.0418514	0.02774	0.0243229		46.2	0.0423	0.0467	0.0343	0.0317	0.0292	0.0372	0.0352	0.0202			0.0423	0.0466	0.0351	0.0321	0.0295	0.0366	0.035	0.0208		0.00466286	0.0155757	-0.00642857	-0.00507286	0.00540143	0.00525143	-0.00726	0.00352286		2.17422e-05	0.000242603	4.13265e-05	2.57339e-05	2.91754e-05	2.75775e-05	5.27076e-05	1.24105e-05
46.4	0.0442629	0.0553257	0.0291214	0.0304271	0.0314014	0.0485014	0.02914	0.0252729		46.4	0.0419	0.0462	0.0341	0.0318	0.0292	0.0369	0.0352	0.0229			0.042	0.0462	0.035	0.0319	0.0294	0.0364	0.0349	0.0191		0.00226286	0.00912571	-0.00587857	-0.00147286	0.00200143	0.0121014	-0.00576	0.00617286		5.12052e-06	8.32787e-05	3.45576e-05	2.16931e-06	4.00572e-06	0.000146445	3.31776e-05	3.81042e-05
46.6	0.0468129	0.0599257	0.0301714	0.0261271	0.0314014	0.0454514	0.02894	0.0228729		46.6	0.0415	0.046	0.0341	0.0317	0.029	0.0369	0.0353	0.0235			0.0416	0.0459	0.0349	0.0318	0.0292	0.0362	0.0348	0.0209		0.00521286	0.0140257	-0.00472857	-0.00567286	0.00220143	0.00925143	-0.00586	0.00197286		2.71739e-05	0.000196721	2.23594e-05	3.21813e-05	4.84629e-06	8.55889e-05	3.43396e-05	3.89217e-06
46.8	0.0451629	0.0569757	0.0304214	0.0292771	0.0307514	0.0422514	0.03109	0.0214229		46.8	0.0411	0.0459	0.034	0.0315	0.0288	0.0368	0.0353	0.0196			0.0411	0.0458	0.0347	0.0317	0.0291	0.036	0.0347	0.0229		0.00406286	0.0111757	-0.00427857	-0.00242286	0.00165143	0.00625143	-0.00361	-0.00147714		1.65068e-05	0.000124897	1.83062e-05	5.87024e-06	2.72722e-06	3.90804e-05	1.30321e-05	2.18195e-06
47	0.0470129	0.0546257	0.0283714	0.0255771	0.0290014	0.0427514	0.02979	0.0257729		47	0.0409	0.0461	0.034	0.0313	0.0286	0.0366	0.0351	0.0203			0.0409	0.046	0.0346	0.0317	0.029	0.0359	0.0346	0.021		0.00611286	0.00862571	-0.00622857	-0.00612286	1.42857e-06	0.00685143	-0.00481	0.00477286		3.7367e-05	7.44029e-05	3.87951e-05	3.74894e-05	2.04082e-12	4.69421e-05	2.31361e-05	2.27802e-05
47.2	0.0455129	0.0554257	0.0296714	0.0312771	0.0289014	0.0442014	0.02639	0.0244229		47.2	0.0409	0.0464	0.0339	0.031	0.0284	0.0364	0.0347	0.0221			0.0409	0.0463	0.0346	0.0315	0.0288	0.0358	0.0344	0.0195		0.00461286	0.00912571	-0.00492857	-0.000222857	0.000101429	0.00840143	-0.00801	0.00492286		2.12785e-05	8.32787e-05	2.42908e-05	4.96653e-08	1.02878e-08	7.0584e-05	6.41601e-05	2.42345e-05
47.4	0.0476129	0.0546257	0.0284214	0.0290271	0.0315014	0.0433014	0.02864	0.0250229		47.4	0.041	0.0467	0.0338	0.0309	0.0283	0.0361	0.0343	0.0222			0.0411	0.0467	0.0346	0.0313	0.0286	0.0356	0.0341	0.0211		0.00651286	0.00792571	-0.00617857	-0.00227286	0.00290143	0.00770143	-0.00546	0.00392286		4.24173e-05	6.28169e-05	3.81747e-05	5.16588e-06	8.41829e-06	5.9312e-05	2.98116e-05	1.53888e-05
47.6	0.0437129	0.0579757	0.0309714	0.0255271	0.0331014	0.0472014	0.02744	0.0250229		47.6	0.0413	0.047	0.0337	0.0308	0.0281	0.036	0.034	0.0199			0.0414	0.0469	0.0345	0.0311	0.0284	0.0356	0.0338	0.0222		0.00231286	0.0110757	-0.00352857	-0.00557286	0.00470143	0.0116014	-0.00636	0.00282286		5.34931e-06	0.000122671	1.24508e-05	3.10567e-05	2.21034e-05	0.000134593	4.04496e-05	7.96852e-06
47.8	0.0464129	0.0557257	0.0277714	0.0311771	0.0390014	0.0444014	0.02629	0.0254729		47.8	0.0416	0.0471	0.0337	0.0308	0.028	0.0361	0.0339	0.0208			0.0416	0.0471	0.0345	0.031	0.0283	0.0355	0.0335	0.0206		0.00481286	0.00862571	-0.00672857	0.000177143	0.0107014	0.00890143	-0.00721	0.00487286		2.31636e-05	7.44029e-05	4.52737e-05	3.13796e-08	0.000114521	7.92354e-05	5.19841e-05	2.37447e-05
48	0.0445629	0.0524757	0.0275214	0.0268271	0.0294014	0.0440014	0.03274	0.0238729		48	0.0418	0.0471	0.0337	0.0308	0.0279	0.0363	0.0339	0.022			0.0418	0.047	0.0345	0.031	0.0283	0.0355	0.0335	0.0204		0.00276286	0.00547571	-0.00697857	-0.00417286	0.00110143	0.00850143	-0.00076	0.00347286		7.63338e-06	2.99834e-05	4.87005e-05	1.74127e-05	1.21314e-06	7.22743e-05	5.776e-07	1.20607e-05
48.2	0.0455129	0.0571257	0.0256714	0.0269771	0.0323514	0.0438014	0.02619	0.0259729		48.2	0.0418	0.0469	0.0338	0.0307	0.0278	0.0364	0.0339	0.0231			0.0418	0.0469	0.0346	0.0311	0.0283	0.0356	0.0336	0.0216		0.00371286	0.0102257	-0.00892857	-0.00412286	0.00405143	0.00820143	-0.00741	0.00437286		1.37853e-05	0.000104565	7.97194e-05	1.6998e-05	1.64141e-05	6.72634e-05	5.49081e-05	1.91219e-05
48.4	0.0435129	0.0540257	0.0278214	0.0323271	0.0305014	0.0444014	0.02654	0.0256229		48.4	0.0417	0.0467	0.0339	0.0307	0.0279	0.0364	0.034	0.0187			0.0417	0.0466	0.0347	0.0312	0.0284	0.0356	0.0339	0.0228		0.00181286	0.00742571	-0.00687857	0.00112714	0.00210143	0.00880143	-0.00736	0.00282286		3.28645e-06	5.51412e-05	4.73147e-05	1.27045e-06	4.416e-06	7.74651e-05	5.41696e-05	7.96852e-06
48.6	0.0443629	0.0534257	0.0294214	0.0246271	0.0280514	0.0409514	0.02674	0.0258229		48.6	0.0415	0.0463	0.0338	0.0307	0.028	0.0363	0.034	0.0196			0.0416	0.0463	0.0346	0.0312	0.0285	0.0356	0.0341	0.0216		0.00276286	0.00712571	-0.00517857	-0.00657286	-0.000448571	0.00535143	-0.00736	0.00422286		7.63338e-06	5.07758e-05	2.68176e-05	4.32025e-05	2.01216e-07	2.86378e-05	5.41696e-05	1.78325e-05
48.8	0.0429629	0.0541257	0.0278714	0.0308271	0.0319514	0.0400514	0.02779	0.0251729		48.8	0.0412	0.046	0.0336	0.0308	0.0282	0.0362	0.0342	0.0215			0.0412	0.0459	0.0344	0.0311	0.0284	0.0355	0.0342	0.0212		0.00176286	0.00822571	-0.00652857	-0.000272857	0.00355143	0.00455143	-0.00641	0.00397286		3.10767e-06	6.76624e-05	4.26222e-05	7.4451e-08	1.26126e-05	2.07155e-05	4.10881e-05	1.57836e-05
49	0.0435129	0.0559257	0.0264714	0.0273771	0.0325514	0.0473514	0.03049	0.0233229		49	0.0408	0.0455	0.0333	0.0309	0.0282	0.0361	0.0343	0.0228			0.0409	0.0454	0.0341	0.0311	0.0283	0.0354	0.034	0.0211		0.00261286	0.0105257	-0.00762857	-0.00372286	0.00425143	0.0119514	-0.00351	0.00222286		6.82702e-06	0.000110791	5.81951e-05	1.38597e-05	1.80746e-05	0.000142837	1.23201e-05	4.94109e-06
49.2	0.0438129	0.0541257	0.0278714	0.0263271	0.0308514	0.0433514	0.02884	0.0237229		49.2	0.0405	0.0449	0.0332	0.0309	0.0281	0.0359	0.0343	0.0205			0.0406	0.0449	0.0338	0.031	0.0283	0.0353	0.0338	0.0224		0.00321286	0.00922571	-0.00592857	-0.00467286	0.00255143	0.00805143	-0.00496	0.00132286		1.03225e-05	8.51138e-05	3.5148e-05	2.18356e-05	6.50979e-06	6.48255e-05	2.46016e-05	1.74995e-06
49.4	0.0420129	0.0520257	0.0283214	0.0362771	0.0302014	0.0446514	0.02749	0.0240229		49.4	0.0402	0.0443	0.033	0.0307	0.0279	0.0358	0.0341	0.0193			0.0402	0.0443	0.0336	0.0309	0.0282	0.0351	0.0335	0.0224		0.00181286	0.00772571	-0.00527857	0.00537714	0.00200143	0.00955143	-0.00601	0.00162286		3.28645e-06	5.96867e-05	2.78633e-05	2.89137e-05	4.00572e-06	9.12298e-05	3.61201e-05	2.63367e-06
49.6	0.0411629	0.0527757	0.0296214	0.0219271	0.0287014	0.0462514	0.02784	0.0240229		49.6	0.0398	0.0437	0.0329	0.0303	0.0277	0.0356	0.0337	0.0209			0.0398	0.0437	0.0335	0.0307	0.0281	0.0349	0.0333	0.0206		0.00136286	0.00907571	-0.00387857	-0.00877286	0.000601429	0.0113514	-0.00546	0.00342286		1.85738e-06	8.23686e-05	1.50433e-05	7.6963e-05	3.61716e-07	0.000128855	2.98116e-05	1.1716e-05
49.8	0.0426129	0.0542257	0.0289214	0.0302771	0.0289514	0.0405014	0.02529	0.0249729		49.8	0.0393	0.0433	0.0326	0.03	0.0275	0.0354	0.0334	0.0224			0.0394	0.0433	0.0334	0.0304	0.0279	0.0348	0.0332	0.0219		0.00321286	0.0109257	-0.00447857	-0.000122857	0.00105143	0.00570143	-0.00791	0.00307286		1.03225e-05	0.000119371	2.00576e-05	1.50939e-08	1.1055e-06	3.25063e-05	6.25681e-05	9.44245e-06
50	0.0432129	0.0514757	0.0273214	0.0216271	0.0314514	0.0424514	0.03074	0.0259229		50	0.0389	0.0429	0.0324	0.0298	0.0274	0.0351	0.0332	0.0219			0.039	0.0429	0.0332	0.0302	0.0277	0.0346	0.0332	0.0227		0.00421286	0.00857571	-0.00587857	-0.00857286	0.00375143	0.00785143	-0.00246	0.00322286		1.77482e-05	7.35429e-05	3.45576e-05	7.34939e-05	1.40732e-05	6.16449e-05	6.0516e-06	1.03868e-05
50.2	0.0407129	0.0523257	0.0259714	0.0291771	0.0279014	0.0404014	0.02699	0.0243729		50.2	0.0386	0.0427	0.0323	0.0298	0.0273	0.0349	0.0332	0.0195			0.0387	0.0427	0.033	0.0299	0.0275	0.0343	0.033	0.0214		0.00201286	0.00962571	-0.00702857	-0.000722857	0.000401429	0.00610143	-0.00601	0.00297286		4.05159e-06	9.26544e-05	4.94008e-05	5.22522e-07	1.61145e-07	3.72274e-05	3.61201e-05	8.83788e-06
50.4	0.0412129	0.0521757	0.0269714	0.0292771	0.0276514	0.0399514	0.02479	0.0245229		50.4	0.0383	0.0426	0.0321	0.0296	0.0271	0.0346	0.0332	0.0212			0.0384	0.0425	0.0328	0.0297	0.0273	0.0341	0.0329	0.0185		0.00281286	0.00967571	-0.00582857	-0.000422857	0.000351429	0.00585143	-0.00811	0.00602286		7.91217e-06	9.36194e-05	3.39722e-05	1.78808e-07	1.23502e-07	3.42392e-05	6.57721e-05	3.62748e-05
50.6	0.0414129	0.0526757	0.0270714	0.0244271	0.0319514	0.0432014	0.02874	0.0213229		50.6	0.0381	0.0424	0.032	0.0294	0.0267	0.0344	0.0331	0.0221			0.0381	0.0424	0.0327	0.0296	0.0271	0.0339	0.0327	0.0192		0.00331286	0.0102757	-0.00562857	-0.00517286	0.00485143	0.00930143	-0.00396	0.00212286		1.0975e-05	0.00010559	3.16808e-05	2.67585e-05	2.35364e-05	8.65166e-05	1.56816e-05	4.50652e-06
50.8	0.0404629	0.0511757	0.0264214	0.0243271	0.0293514	0.0428014	0.02599	0.0237729		50.8	0.0379	0.0422	0.0319	0.0291	0.0264	0.0343	0.0327	0.0219			0.038	0.0421	0.0326	0.0295	0.0269	0.0338	0.0324	0.0208		0.00246286	0.00907571	-0.00617857	-0.00517286	0.00245143	0.00900143	-0.00641	0.00297286		6.06567e-06	8.23686e-05	3.81747e-05	2.67585e-05	6.0095e-06	8.10257e-05	4.10881e-05	8.83788e-06
51	0.0412629	0.0508257	0.0274714	0.0286771	0.0325514	0.0441514	0.02674	0.0233729		51	0.0378	0.0418	0.0318	0.0288	0.0262	0.0343	0.0324	0.0182			0.0378	0.0418	0.0326	0.0293	0.0267	0.0337	0.0322	0.0203		0.00346286	0.00902571	-0.00512857	-0.000622857	0.00585143	0.0104514	-0.00546	0.00307286		1.19914e-05	8.14635e-05	2.63022e-05	3.87951e-07	3.42392e-05	0.000109232	2.98116e-05	9.44245e-06
51.2	0.0428629	0.0508757	0.0266714	0.0228771	0.0287514	0.0445014	0.02914	0.0214729		51.2	0.0376	0.0415	0.0317	0.0287	0.0261	0.0342	0.0321	0.0191			0.0377	0.0415	0.0325	0.0292	0.0265	0.0336	0.0321	0.0182		0.00516286	0.00937571	-0.00582857	-0.00632286	0.00225143	0.0109014	-0.00296	0.00327286		2.66551e-05	8.7904e-05	3.39722e-05	3.99785e-05	5.06893e-06	0.000118841	8.7616e-06	1.07116e-05
51.4	0.0401129	0.0510257	0.0277214	0.0283271	0.0294014	0.0415014	0.02324	0.0252729		51.4	0.0374	0.0411	0.0316	0.0287	0.026	0.034	0.032	0.0209			0.0375	0.0411	0.0324	0.029	0.0263	0.0336	0.0318	0.0184		0.00261286	0.00992571	-0.00467857	-0.000672857	0.00310143	0.00790143	-0.00856	0.00687286		6.82702e-06	9.85198e-05	2.1889e-05	4.52737e-07	9.61886e-06	6.24326e-05	7.32736e-05	4.72362e-05
51.6	0.0375129	0.0506757	0.0272214	0.0268271	0.0279514	0.0444514	0.02854	0.0235229		51.6	0.0371	0.0406	0.0316	0.0287	0.026	0.0338	0.0319	0.0219			0.0372	0.0406	0.0322	0.0289	0.0261	0.0334	0.0316	0.0204		0.000312857	0.0100757	-0.00497857	-0.00207286	0.00185143	0.0110514	-0.00306	0.00312286		9.78796e-08	0.00010152	2.47862e-05	4.29674e-06	3.42779e-06	0.000122134	9.3636e-06	9.75224e-06
51.8	0.0387629	0.0517757	0.0282214	0.0222771	0.0284514	0.0430514	0.02829	0.0241229		51.8	0.0367	0.0403	0.0314	0.0285	0.0258	0.0335	0.0319	0.0194			0.0368	0.0403	0.032	0.0287	0.0261	0.0331	0.0314	0.0211		0.00196286	0.0114757	-0.00377857	-0.00642286	0.00235143	0.00995143	-0.00311	0.00302286		3.85281e-06	0.000131692	1.42776e-05	4.12531e-05	5.52922e-06	9.90309e-05	9.6721e-06	9.13767e-06
52	0.0388129	0.0512757	0.0277714	0.0311771	0.0260014	0.0385514	0.02509	0.0223229		52	0.0362	0.0402	0.0311	0.0282	0.0256	0.0333	0.0317	0.0171			0.0363	0.0401	0.0318	0.0285	0.026	0.0328	0.0313	0.0208		0.00251286	0.0111757	-0.00402857	0.00267714	1.42857e-06	0.00575143	-0.00621	0.00152286		6.31445e-06	0.000124897	1.62294e-05	7.16709e-06	2.04082e-12	3.30789e-05	3.85641e-05	2.31909e-06
52.2	0.0393129	0.0521257	0.0264214	0.0214771	0.0299514	0.0438514	0.02599	0.0198729		52.2	0.0359	0.0401	0.0309	0.028	0.0254	0.0331	0.0315	0.0185			0.036	0.04	0.0316	0.0284	0.026	0.0325	0.0313	0.0194		0.00331286	0.0121257	-0.00517857	-0.00692286	0.00395143	0.0113514	-0.00531	0.000472857		1.0975e-05	0.000147033	2.68176e-05	4.7926e-05	1.56138e-05	0.000128855	2.81961e-05	2.23594e-07
52.4	0.0414129	0.0513757	0.0275214	0.0264271	0.0319514	0.0433014	0.02529	0.0242229		52.4	0.0357	0.04	0.0307	0.0277	0.0253	0.0329	0.0313	0.0203			0.0358	0.0399	0.0315	0.0282	0.0258	0.0323	0.0313	0.0206		0.00561286	0.0114757	-0.00397857	-0.00177286	0.00615143	0.0110014	-0.00601	0.00362286		3.15042e-05	0.000131692	1.5829e-05	3.14302e-06	3.78401e-05	0.000121031	3.61201e-05	1.31251e-05
52.6	0.0398629	0.0520257	0.0267214	0.0230271	0.0340014	0.0451514	0.02694	0.0245229		52.6	0.0355	0.0399	0.0306	0.0277	0.0251	0.0326	0.0313	0.0211			0.0356	0.0399	0.0313	0.0281	0.0256	0.0321	0.0314	0.0219		0.00426286	0.0121257	-0.00457857	-0.00507286	0.00840143	0.0130514	-0.00446	0.00262286		1.8172e-05	0.000147033	2.09633e-05	2.57339e-05	7.0584e-05	0.00017034	1.98916e-05	6.87938e-06
52.8	0.0373129	0.0504757	0.0260714	0.0252771	0.0270514	0.0391514	0.02729	0.0240729		52.8	0.0355	0.0399	0.0305	0.0277	0.025	0.0324	0.0313	0.0195			0.0355	0.0399	0.0312	0.028	0.0254	0.0321	0.0313	0.0219		0.00181286	0.0105757	-0.00512857	-0.00272286	0.00165143	0.00705143	-0.00401	0.00217286		3.28645e-06	0.000111846	2.63022e-05	7.41395e-06	2.72722e-06	4.97226e-05	1.60801e-05	4.72131e-06
53	0.0372629	0.0514757	0.0258214	0.0255271	0.0269014	0.0402514	0.02404	0.0243729		53	0.0354	0.04	0.0305	0.0277	0.0249	0.0323	0.0312	0.0188			0.0355	0.0399	0.0311	0.0279	0.0253	0.032	0.0311	0.0191		0.00176286	0.0115757	-0.00527857	-0.00237286	0.00160143	0.00825143	-0.00706	0.00527286		3.10767e-06	0.000133997	2.78633e-05	5.63045e-06	2.56457e-06	6.80861e-05	4.98436e-05	2.7803e-05
53.2	0.0370129	0.0518257	0.0267714	0.0249271	0.0259514	0.0461014	0.02629	0.0240729		53.2	0.0354	0.0401	0.0304	0.0274	0.0248	0.0323	0.0309	0.0199			0.0355	0.0401	0.031	0.0278	0.0252	0.032	0.0307	0.0197		0.00151286	0.0117257	-0.00422857	-0.00287286	0.000751429	0.0141014	-0.00441	0.00437286		2.28874e-06	0.000137492	1.78808e-05	8.25331e-06	5.64645e-07	0.00019885	1.94481e-05	1.91219e-05
53.4	0.0396629	0.0519257	0.0268714	0.0241271	0.0251014	0.0446014	0.02569	0.0235729		53.4	0.0355	0.0403	0.0304	0.0272	0.0247	0.0324	0.0307	0.0209			0.0356	0.0402	0.031	0.0276	0.0251	0.0321	0.0303	0.0208		0.00406286	0.0117257	-0.00412857	-0.00347286	1.42857e-06	0.0125014	-0.00461	0.00277286		1.65068e-05	0.000137492	1.70451e-05	1.20607e-05	2.04082e-12	0.000156286	2.12521e-05	7.68874e-06
53.6	0.0362629	0.0504257	0.0267214	0.0282771	0.0300514	0.0425014	0.02529	0.0258229		53.6	0.0356	0.0404	0.0303	0.027	0.0246	0.0325	0.0304	0.02			0.0356	0.0403	0.0309	0.0275	0.0251	0.032	0.0301	0.0212		0.000662857	0.0101257	-0.00417857	0.000777143	0.00495143	0.0105014	-0.00481	0.00462286		4.3938e-07	0.00010253	1.74605e-05	6.03951e-07	2.45166e-05	0.00011028	2.31361e-05	2.13708e-05
53.8	0.0364629	0.0514257	0.0275214	0.0193771	0.0293514	0.0409514	0.02979	0.0230729		53.8	0.0357	0.0403	0.0302	0.0269	0.0245	0.0324	0.0303	0.0185			0.0357	0.0402	0.0309	0.0274	0.025	0.0319	0.0301	0.0196		0.000762857	0.0112257	-0.00337857	-0.00802286	0.00435143	0.00905143	-0.00031	0.00347286		5.81951e-07	0.000126017	1.14147e-05	6.43662e-05	1.89349e-05	8.19284e-05	9.61e-08	1.20607e-05
54	0.0383629	0.0479757	0.0283714	0.0280771	0.0269014	0.0391514	0.02549	0.0218229		54	0.0357	0.0402	0.0302	0.0271	0.0245	0.0323	0.0302	0.0195			0.0358	0.0402	0.0308	0.0274	0.025	0.0318	0.0302	0.0199		0.00256286	0.00777571	-0.00242857	0.000677143	0.00190143	0.00735143	-0.00471	0.00192286		6.56824e-06	6.04617e-05	5.89796e-06	4.58522e-07	3.61543e-06	5.40435e-05	2.21841e-05	3.69738e-06
54.2	0.0360129	0.0511257	0.0271714	0.0258271	0.0247514	0.0371014	0.02589	0.0229729		54.2	0.0357	0.0401	0.0301	0.0272	0.0246	0.0321	0.0304	0.0206			0.0357	0.04	0.0308	0.0274	0.0249	0.0316	0.0303	0.0207		0.000312857	0.0111257	-0.00362857	-0.00157286	-0.000148571	0.00550143	-0.00441	0.00227286		9.78796e-08	0.000123782	1.31665e-05	2.47388e-06	2.20735e-08	3.02657e-05	1.94481e-05	5.16588e-06
54.4	0.0363629	0.0513757	0.0274214	0.0217771	0.0234014	0.0424514	0.02639	0.0221729		54.4	0.0356	0.0399	0.0301	0.0272	0.0245	0.0321	0.0306	0.0214			0.0356	0.0398	0.0307	0.0274	0.0248	0.0316	0.0304	0.021		0.000762857	0.0115757	-0.00327857	-0.00562286	-0.00139857	0.0108514	-0.00401	0.00117286		5.81951e-07	0.000133997	1.0749e-05	3.16165e-05	1.956e-06	0.000117754	1.60801e-05	1.37559e-06
54.6	0.0353129	0.0501757	0.0261214	0.0253771	0.0234514	0.0426514	0.02419	0.0242729		54.6	0.0355	0.0396	0.0301	0.0271	0.0244	0.0321	0.0308	0.0198			0.0355	0.0396	0.0307	0.0274	0.0247	0.0315	0.0304	0.02		-0.000187143	0.0105757	-0.00457857	-0.00202286	-0.00124857	0.0111514	-0.00621	0.00427286		3.50224e-08	0.000111846	2.09633e-05	4.09195e-06	1.55893e-06	0.000124354	3.85641e-05	1.82573e-05
54.8	0.0348129	0.0478757	0.0260214	0.0244271	0.0280514	0.0461014	0.02404	0.0232229		54.8	0.0354	0.0394	0.03	0.0269	0.0243	0.0321	0.0307	0.0185			0.0354	0.0394	0.0306	0.0273	0.0246	0.0315	0.0303	0.019		-0.000587143	0.00847571	-0.00457857	-0.00287286	0.00345143	0.0146014	-0.00626	0.00422286		3.44737e-07	7.18377e-05	2.09633e-05	8.25331e-06	1.19124e-05	0.000213202	3.91876e-05	1.78325e-05
55	0.0351629	0.0493757	0.0273714	0.0233771	0.0260514	0.0420514	0.02609	0.0237229		55	0.0352	0.0392	0.0298	0.0267	0.0242	0.0321	0.0304	0.0183			0.0353	0.0392	0.0304	0.0272	0.0245	0.0314	0.0301	0.0191		-0.000137143	0.0101757	-0.00302857	-0.00382286	0.00155143	0.0106514	-0.00401	0.00462286		1.88082e-08	0.000103545	9.17224e-06	1.46142e-05	2.40693e-06	0.000113453	1.60801e-05	2.13708e-05
55.2	0.0345629	0.0498757	0.0247714	0.0248771	0.0241014	0.0391014	0.02459	0.0232729		55.2	0.0351	0.039	0.0296	0.0266	0.0241	0.0319	0.0301	0.0198			0.0351	0.039	0.0302	0.027	0.0244	0.0314	0.0299	0.0198		-0.000537143	0.0108757	-0.00542857	-0.00212286	-0.000298571	0.00770143	-0.00531	0.00347286		2.88522e-07	0.000118281	2.94694e-05	4.50652e-06	8.91449e-08	5.9312e-05	2.81961e-05	1.20607e-05
55.4	0.0381129	0.0502757	0.0263214	0.0214771	0.0277014	0.0419014	0.02444	0.0215729		55.4	0.0349	0.0389	0.0295	0.0266	0.0241	0.0317	0.0298	0.021			0.035	0.0389	0.0301	0.0269	0.0243	0.0312	0.0296	0.0209		0.00311286	0.0113757	-0.00377857	-0.00542286	0.00340143	0.0107014	-0.00516	0.000672857		9.68988e-06	0.000129407	1.42776e-05	2.94074e-05	1.15697e-05	0.000114521	2.66256e-05	4.52737e-07
55.6	0.0345129	0.0487757	0.0258714	0.0209771	0.0238514	0.0382014	0.02379	0.0213229		55.6	0.0348	0.0388	0.0294	0.0265	0.024	0.0315	0.0297	0.0207			0.0348	0.0388	0.03	0.0268	0.0243	0.0311	0.0295	0.0191		-0.000287143	0.00997571	-0.00412857	-0.00582286	-0.000448571	0.00710143	-0.00571	0.00222286		8.2451e-08	9.95149e-05	1.70451e-05	3.39057e-05	2.01216e-07	5.04303e-05	3.26041e-05	4.94109e-06
55.8	0.0346129	0.0488257	0.0264714	0.0274271	0.0247014	0.0377014	0.02479	0.0238729		55.8	0.0346	0.0387	0.0294	0.0264	0.0239	0.0314	0.0298	0.0197			0.0347	0.0387	0.0299	0.0267	0.0242	0.031	0.0295	0.018		-8.71429e-05	0.0101257	-0.00342857	0.000727143	0.000501429	0.00670143	-0.00471	0.00587286		7.59388e-09	0.00010253	1.17551e-05	5.28737e-07	2.51431e-07	4.49091e-05	2.21841e-05	3.44905e-05
56	0.0361629	0.0499257	0.0250714	0.0224771	0.0255014	0.0376014	0.02509	0.0222729		56	0.0345	0.0386	0.0294	0.0263	0.0238	0.0314	0.0299	0.0187			0.0346	0.0386	0.0299	0.0266	0.0241	0.0308	0.0295	0.0181		0.00156286	0.0113257	-0.00482857	-0.00412286	0.00140143	0.00680143	-0.00441	0.00417286		2.44252e-06	0.000128272	2.33151e-05	1.6998e-05	1.964e-06	4.62594e-05	1.94481e-05	1.74127e-05
56.2	0.0347129	0.0469257	0.0248714	0.0220271	0.0233514	0.0440014	0.02489	0.0229229		56.2	0.0344	0.0385	0.0293	0.0261	0.0236	0.0313	0.0299	0.0186			0.0345	0.0385	0.0299	0.0265	0.024	0.0307	0.0295	0.0182		0.000212857	0.00842571	-0.00502857	-0.00447286	-0.000648571	0.0133014	-0.00461	0.00472286		4.53082e-08	7.09927e-05	2.52865e-05	2.00065e-05	4.20645e-07	0.000176928	2.12521e-05	2.23054e-05
56.4	0.0352629	0.0482757	0.0253714	0.0270771	0.0254014	0.0461014	0.02589	0.0243729		56.4	0.0344	0.0385	0.0292	0.026	0.0234	0.0312	0.0297	0.0197			0.0344	0.0384	0.0298	0.0264	0.0238	0.0307	0.0295	0.0199		0.000862857	0.00987571	-0.00442857	0.000677143	0.00160143	0.0154014	-0.00361	0.00447286		7.44522e-07	9.75297e-05	1.96122e-05	4.58522e-07	2.56457e-06	0.000237204	1.30321e-05	2.00065e-05
56.6	0.0352629	0.0475257	0.0258714	0.0223771	0.0262014	0.0339014	0.02584	0.0227729		56.6	0.0343	0.0384	0.0291	0.026	0.0233	0.0311	0.0294	0.0197			0.0343	0.0383	0.0298	0.0263	0.0237	0.0306	0.0293	0.0181		0.000962857	0.00922571	-0.00392857	-0.00392286	0.00250143	0.00330143	-0.00346	0.00467286		9.27094e-07	8.51138e-05	1.54337e-05	1.53888e-05	6.25714e-06	1.08994e-05	1.19716e-05	2.18356e-05
56.8	0.0365629	0.0493257	0.0264714	0.0227271	0.0222014	0.0339014	0.02554	0.0238729		56.8	0.0342	0.0383	0.029	0.0259	0.0233	0.031	0.0291	0.0203			0.0343	0.0383	0.0297	0.0263	0.0235	0.0306	0.0291	0.017		0.00226286	0.0110257	-0.00322857	-0.00357286	-0.00129857	0.00330143	-0.00356	0.00687286		5.12052e-06	0.000121566	1.04237e-05	1.27653e-05	1.68629e-06	1.08994e-05	1.26736e-05	4.72362e-05
57	0.0361129	0.0466757	0.0265214	0.0216271	0.0271014	0.0390014	0.02414	0.0217229		57	0.0342	0.0382	0.0291	0.0259	0.0232	0.031	0.029	0.0193			0.0342	0.0382	0.0296	0.0262	0.0235	0.0305	0.0289	0.0182		0.00191286	0.00847571	-0.00307857	-0.00457286	0.00360143	0.00850143	-0.00476	0.00352286		3.65902e-06	7.18377e-05	9.4776e-06	2.0911e-05	1.29703e-05	7.22743e-05	2.26576e-05	1.24105e-05
57.2	0.0354629	0.0491757	0.0269214	0.0240271	0.0264514	0.0414014	0.02394	0.0214229		57.2	0.0341	0.0382	0.0291	0.0258	0.0232	0.031	0.029	0.0177			0.0341	0.0381	0.0296	0.0261	0.0234	0.0304	0.0287	0.0193		0.00136286	0.0110757	-0.00267857	-0.00207286	0.00305143	0.0110014	-0.00476	0.00212286		1.85738e-06	0.000122671	7.17474e-06	4.29674e-06	9.31122e-06	0.000121031	2.26576e-05	4.50652e-06
57.4	0.0354129	0.0490257	0.0277214	0.0221271	0.0235014	0.0403014	0.02399	0.0189729		57.4	0.0341	0.0381	0.0291	0.0256	0.023	0.0309	0.029	0.0177			0.0341	0.0381	0.0295	0.026	0.0234	0.0303	0.0286	0.0202		0.00131286	0.0109257	-0.00177857	-0.00387286	0.000101429	0.0100014	-0.00461	-0.00122714		1.72359e-06	0.000119371	3.16332e-06	1.4999e-05	1.02878e-08	0.000100029	2.12521e-05	1.50588e-06
57.6	0.0355629	0.0503257	0.0275714	0.0240271	0.0252514	0.0378014	0.02429	0.0231729		57.6	0.034	0.038	0.029	0.0255	0.0229	0.0308	0.0289	0.0181			0.0341	0.038	0.0295	0.0259	0.0233	0.0302	0.0286	0.0196		0.00146286	0.0123257	-0.00192857	-0.00187286	0.00195143	0.00760143	-0.00431	0.00357286		2.13995e-06	0.000151923	3.71939e-06	3.50759e-06	3.80807e-06	5.77817e-05	1.85761e-05	1.27653e-05
57.8	0.0341629	0.0471757	0.0265714	0.0204771	0.0244014	0.0367514	0.02434	0.0243229		57.8	0.034	0.038	0.0288	0.0254	0.0228	0.0306	0.0289	0.0192			0.034	0.0379	0.0294	0.0258	0.0232	0.0301	0.0286	0.0186		0.000162857	0.00927571	-0.00282857	-0.00532286	0.00120143	0.00665143	-0.00426	0.00572286		2.65224e-08	8.60389e-05	8.00082e-06	2.83328e-05	1.44343e-06	4.42415e-05	1.81476e-05	3.27511e-05
58	0.0364129	0.0491257	0.0268714	0.0256771	0.0235014	0.0365014	0.02129	0.0231729		58	0.0339	0.038	0.0287	0.0254	0.0228	0.0304	0.0287	0.0187			0.034	0.0379	0.0293	0.0258	0.0232	0.03	0.0286	0.019		0.00241286	0.0112257	-0.00242857	-0.000122857	0.000301429	0.00650143	-0.00731	0.00417286		5.82188e-06	0.000126017	5.89796e-06	1.50939e-08	9.08592e-08	4.22686e-05	5.34361e-05	1.74127e-05
58.2	0.0359129	0.0501757	0.0256714	0.0204271	0.0249514	0.0351514	0.02509	0.0235729		58.2	0.0339	0.0381	0.0287	0.0254	0.0228	0.0304	0.0286	0.0182			0.034	0.0381	0.0292	0.0257	0.0231	0.0299	0.0286	0.0192		0.00191286	0.0120757	-0.00352857	-0.00527286	0.00185143	0.00525143	-0.00351	0.00437286		3.65902e-06	0.000145823	1.24508e-05	2.7803e-05	3.42779e-06	2.75775e-05	1.23201e-05	1.91219e-05
58.4	0.0375629	0.0484257	0.0267214	0.0239271	0.0285014	0.0382014	0.02439	0.0197229		58.4	0.034	0.0382	0.0287	0.0254	0.0228	0.0304	0.0286	0.0181			0.034	0.0382	0.0292	0.0257	0.023	0.0298	0.0285	0.0199		0.00356286	0.0102257	-0.00247857	-0.00177286	0.00550143	0.00840143	-0.00411	-0.000177143		1.2694e-05	0.000104565	6.14332e-06	3.14302e-06	3.02657e-05	7.0584e-05	1.68921e-05	3.13796e-08
58.6	0.0356629	0.0499757	0.0280714	0.0197771	0.0264514	0.0393514	0.02254	0.0224729		58.6	0.034	0.0384	0.0288	0.0254	0.0227	0.0304	0.0286	0.0189			0.0341	0.0383	0.0292	0.0256	0.0229	0.0298	0.0284	0.0188		0.00156286	0.0116757	-0.00112857	-0.00582286	0.00355143	0.00955143	-0.00586	0.00367286		2.44252e-06	0.000136322	1.27367e-06	3.39057e-05	1.26126e-05	9.12298e-05	3.43396e-05	1.34899e-05
58.8	0.0368129	0.0533757	0.0255214	0.0253271	0.0241514	0.0389514	0.02669	0.0212229		58.8	0.0341	0.0385	0.0288	0.0253	0.0226	0.0304	0.0286	0.0194			0.0341	0.0385	0.0292	0.0256	0.0229	0.0298	0.0283	0.0175		0.00271286	0.0148757	-0.00367857	-0.000272857	0.00125143	0.00915143	-0.00161	0.00372286		7.35959e-06	0.000221287	1.35319e-05	7.4451e-08	1.56607e-06	8.37486e-05	2.5921e-06	1.38597e-05
59	0.0350629	0.0514257	0.0269214	0.0189271	0.0252014	0.0330014	0.02174	0.0223729		59	0.0342	0.0386	0.0287	0.0252	0.0225	0.0304	0.0285	0.0199			0.0342	0.0386	0.0292	0.0255	0.0229	0.0298	0.0282	0.0178		0.000862857	0.0128257	-0.00227857	-0.00657286	0.00230143	0.00320143	-0.00646	0.00457286		7.44522e-07	0.000164499	5.19189e-06	4.32025e-05	5.29657e-06	1.02491e-05	4.17316e-05	2.0911e-05
59.2	0.0349629	0.0495757	0.0261714	0.0252771	0.0225014	0.0327014	0.02384	0.0219229		59.2	0.0342	0.0388	0.0287	0.0252	0.0225	0.0303	0.0285	0.0196			0.0343	0.0387	0.0292	0.0255	0.0229	0.0299	0.0281	0.0184		0.000662857	0.0108757	-0.00302857	-0.000222857	-0.000398571	0.00280143	-0.00426	0.00352286		4.3938e-07	0.000118281	9.17224e-06	4.96653e-08	1.58859e-07	7.848e-06	1.81476e-05	1.24105e-05
59.4	0.0349129	0.0495257	0.0269714	0.0191771	0.0242514	0.0339514	0.02134	0.0233729		59.4	0.0344	0.039	0.0287	0.0252	0.0226	0.0303	0.0284	0.0189			0.0344	0.0389	0.0293	0.0255	0.0229	0.0298	0.0282	0.0187		0.000512857	0.0106257	-0.00232857	-0.00632286	0.00135143	0.00415143	-0.00686	0.00467286		2.63022e-07	0.000112906	5.42224e-06	3.99785e-05	1.82636e-06	1.72344e-05	4.70596e-05	2.18356e-05
59.6	0.0364129	0.0485757	0.0267714	0.0234271	0.0269514	0.0348514	0.02244	0.0230229		59.6	0.0345	0.0391	0.0288	0.0253	0.0227	0.0304	0.0285	0.0185			0.0345	0.039	0.0293	0.0256	0.0229	0.0298	0.0282	0.017		0.00191286	0.00957571	-0.00252857	-0.00217286	0.00405143	0.00505143	-0.00576	0.00602286		3.65902e-06	9.16943e-05	6.39367e-06	4.72131e-06	1.64141e-05	2.55169e-05	3.31776e-05	3.62748e-05
59.8	0.0360629	0.0492757	0.0264214	0.0221771	0.0282014	0.0353014	0.02169	0.0205229		59.8	0.0346	0.0391	0.0289	0.0253	0.0227	0.0305	0.0285	0.0182			0.0346	0.039	0.0293	0.0256	0.0229	0.0298	0.0282	0.0165		0.00146286	0.0102757	-0.00287857	-0.00342286	0.00530143	0.00550143	-0.00651	0.00402286		2.13995e-06	0.00010559	8.28617e-06	1.1716e-05	2.81051e-05	3.02657e-05	4.23801e-05	1.61834e-05
60	0.0375129	0.0492257	0.0269214	0.0230771	0.0260514	0.0408014	0.02539	0.0218729		60	0.0347	0.039	0.0289	0.0254	0.0227	0.0306	0.0286	0.0177			0.0346	0.0389	0.0293	0.0256	0.0229	0.0298	0.0282	0.0167		0.00291286	0.0103257	-0.00237857	-0.00252286	0.00315143	0.0110014	-0.00281	0.00517286		8.48474e-06	0.00010662	5.6576e-06	6.36481e-06	9.9315e-06	0.000121031	7.8961e-06	2.67585e-05
									PCC		0.942886	0.923071	0.962088	0.977032	0.956076	0.943042	0.979615	0.969343		PCC	0.944349	0.926816	0.968551	0.977096	0.967491	0.948826	0.982477	0.977014
[truncated: 6 more columns]
