# Supplementary material for: Application of different building representation techniques in HEC-RAS 2-D for urban flood modeling using the Toce River experimental case
Source: PeerJ. 2021 Jul 2;9:e11667. doi: 10.7717/peerj.11667 (PMC8256810; doi:10.7717/peerj.11667)
Supplement: Supplemental Information 7 [file peerj-09-11667-s007.xlsx]

## Sheet: 2B_BB_&_BR
t	S3	S4	S5	S6	S7	S8	S9	S10		time	HEC_P3	HEC_P4	HEC_P5	HEC_P6	HEC_P7	HEC_P8	HEC_P9	HEC_P10		HEC_2B_2_P3	HEC_2B_2_P4	HEC_2B_2_P5	HEC_2B_2_P6	HEC_2B_2_P7	HEC_2B_2_P8	HEC_2B_2_P9	HEC_2B_2_P10		HEC_2B_5_P3	HEC_2B_5_P4	HEC_2B_5_P5	HEC_2B_5_P6	HEC_2B_5_P7	HEC_2B_5_P8	HEC_2B_5_P9	HEC_2B_5_P10		HEC_Dif_P3	HEC_Dif_P4	HEC_Dif_P5	HEC_Dif_P6	HEC_Dif_P7	HEC_Dif_P8	HEC_Dif_P9	HEC_Dif_P10		HEC_BR_10_P3	HEC_BR_10_P4	HEC_BR_10_P5
0	-3.33333e-05	3.54167e-05	-0.000102083	-3.33333e-05	0.000152083	-0.00013125	-4.58333e-05	-1.04167e-05		0	0	0	0	0	0	0	0	0		0	0	0	0	0	0	0	0		0	0	0	0	0	0	0	0		0	0	0	0	0	0	0	0		0	0	0
0.2	0.000116667	0.000385417	-0.000102083	-8.33333e-05	0.000302083	-8.125e-05	5.41667e-05	-0.000160417		0.2	0	0	0	0	0	0	0	0		0	0	0	0	0	0	0	0		0	0	0	0	0	0	0	0		0	0	0	0	0	0	0	0		0	0	0
0.4	1.66667e-05	-0.000114583	-2.08333e-06	-3.33333e-05	5.20833e-05	-0.00013125	0.000204167	-1.04167e-05		0.4	0	0	0	0	0	0	0	0		0	0	0	0	0	0	0	0		0	0	0	0	0	0	0	0		0	0	0	0	0	0	0	0		0	0	0
0.6	-8.33333e-05	-1.45833e-05	4.79167e-05	1.66667e-05	-4.79167e-05	1.875e-05	-0.000195833	-1.04167e-05		0.6	0	0	0	0	0	0	0	0		0	0	0	0	0	0	0	0		0	0	0	0	0	0	0	0		0	0	0	0	0	0	0	0		0	0	0
0.8	-3.33333e-05	0.000135417	-2.08333e-06	6.66667e-05	-0.000147917	-0.00013125	-9.58333e-05	0.000189583		0.8	0	0	0	0	0	0	0	0		0	0	0	0	0	0	0	0		0	0	0	0	0	0	0	0		0	0	0	0	0	0	0	0		0	0	0
1	-8.33333e-05	8.54167e-05	4.79167e-05	6.66667e-05	-0.000147917	6.875e-05	4.16667e-06	-1.04167e-05		1	0	0	0	0	0	0	0	0		0	0	0	0	0	0	0	0		0	0	0	0	0	0	0	0		0	0	0	0	0	0	0	0		0	0	0
1.2	6.66667e-05	-0.000114583	4.79167e-05	0.000266667	-0.000147917	1.875e-05	-4.58333e-05	-0.000110417		1.2	0	0	0	0	0	0	0	0		0	0	0	0	0	0	0	0		0	0	0	0	0	0	0	0		0	0	0	0	0	0	0	0		0	0	0
1.4	1.66667e-05	3.54167e-05	4.79167e-05	-8.33333e-05	-0.000147917	6.875e-05	5.41667e-05	0.000139583		1.4	0	0	0	0	0	0	0	0		0	0	0	0	0	0	0	0		0	0	0	0	0	0	0	0		0	0	0	0	0	0	0	0		0	0	0
1.6	0.000316667	3.54167e-05	4.79167e-05	-8.33333e-05	-9.79167e-05	6.875e-05	0.000104167	3.95833e-05		1.6	0	0	0	0	0	0	0	0		0	0	0	0	0	0	0	0		0	0	0	0	0	0	0	0		0	0	0	0	0	0	0	0		0	0	0
1.8	1.66667e-05	-0.000164583	4.79167e-05	-8.33333e-05	-9.79167e-05	0.00021875	0.000104167	-0.000160417		1.8	0	0	0	0	0	0	0	0		0	0	0	0	0	0	0	0		0	0	0	0	0	0	0	0		0	0	0	0	0	0	0	0		0	0	0
2	-0.000133333	-6.45833e-05	4.79167e-05	-3.33333e-05	2.08333e-06	1.875e-05	-0.000145833	-1.04167e-05		2	0	0	0	0	0	0	0	0		0	0	0	0	0	0	0	0		0	0	0	0	0	0	0	0		0	0	0	0	0	0	0	0		0	0	0
2.2	1.66667e-05	-1.45833e-05	-2.08333e-06	1.66667e-05	-4.79167e-05	6.875e-05	-4.58333e-05	-6.04167e-05		2.2	0	0	0	0	0	0	0	0		0	0	0	0	0	0	0	0		0	0	0	0	0	0	0	0		0	0	0	0	0	0	0	0		0	0	0
2.4	-8.33333e-05	0.000135417	4.79167e-05	-3.33333e-05	5.20833e-05	6.875e-05	5.41667e-05	0.000139583		2.4	0	0	0	0	0	0	0	0		0	0	0	0	0	0	0	0		0	0	0	0	0	0	0	0		0	0	0	0	0	0	0	0		0	0	0
2.6	0.000116667	-0.000114583	-5.20833e-05	1.66667e-05	-9.79167e-05	-0.00013125	-4.58333e-05	-6.04167e-05		2.6	0	0	0	0	0	0	0	0		0	0	0	0	0	0	0	0		0	0	0	0	0	0	0	0		0	0	0	0	0	0	0	0		0	0	0
2.8	6.66667e-05	-6.45833e-05	-2.08333e-06	6.66667e-05	5.20833e-05	-8.125e-05	5.41667e-05	-0.000110417		2.8	0	0	0	0	0	0	0	0		0	0	0	0	0	0	0	0		0	0	0	0	0	0	0	0		0	0	0	0	0	0	0	0		0	0	0
3	-0.000133333	-1.45833e-05	4.79167e-05	0.000116667	5.20833e-05	-0.00013125	0.000104167	0.000139583		3	0	0	0	0	0	0	0	0		0	0	0	0	0	0	0	0		0	0	0	0	0	0	0	0		0	0	0	0	0	0	0	0		0	0	0
3.2	-3.33333e-05	8.54167e-05	-5.20833e-05	0.000116667	5.20833e-05	6.875e-05	-0.000195833	3.95833e-05		3.2	0	0	0	0	0	0	0	0		0	0	0	0	0	0	0	0		0	0	0	0	0	0	0	0		0	0	0	0	0	0	0	0		0	0	0
3.4	-0.000133333	-0.000164583	-2.08333e-06	-0.000133333	2.08333e-06	-0.00013125	-9.58333e-05	-0.000160417		3.4	0	0	0	0	0	0	0	0		0	0	0	0	0	0	0	0		0	0	0	0	0	0	0	0		0	0	0	0	0	0	0	0		0	0	0
3.6	1.66667e-05	-6.45833e-05	4.79167e-05	-8.33333e-05	2.08333e-06	1.875e-05	-4.58333e-05	3.95833e-05		3.6	0	0	0	0	0	0	0	0		0	0	0	0	0	0	0	0		0	0	0	0	0	0	0	0		0	0	0	0	0	0	0	0		0	0	0
3.8	1.66667e-05	-1.45833e-05	-2.08333e-06	-3.33333e-05	2.08333e-06	-3.125e-05	-4.58333e-05	-1.04167e-05		3.8	0	0	0	0	0	0	0	0		0	0	0	0	0	0	0	0		0	0	0	0	0	0	0	0		0	0	0	0	0	0	0	0		0	0	0
4	6.66667e-05	0.000135417	4.79167e-05	-3.33333e-05	5.20833e-05	0.00011875	5.41667e-05	0.000189583		4	0	0	0	0	0	0	0	0		0	0	0	0	0	0	0	0		0	0	0	0	0	0	0	0		0	0	0	0	0	0	0	0		0	0	0
4.2	-3.33333e-05	-0.000114583	-5.20833e-05	1.66667e-05	5.20833e-05	-3.125e-05	0.000104167	-1.04167e-05		4.2	0	0	0	0	0	0	0	0		0	0	0	0	0	0	0	0		0	0	0	0	0	0	0	0		0	0	0	0	0	0	0	0		0	0	0
4.4	-0.000133333	-1.45833e-05	-0.000152083	-3.33333e-05	5.20833e-05	0.00016875	0.000204167	-0.000110417		4.4	0	0	0	0	0	0	0	0		0	0	0	0	0	0	0	0		0	0	0	0	0	0	0	0		0	0	0	0	0	0	0	0		0	0	0
4.6	6.66667e-05	-1.45833e-05	-2.08333e-06	1.66667e-05	0.000102083	1.875e-05	-9.58333e-05	8.95833e-05		4.6	0	0	0	0	0	0	0	0		0	0	0	0	0	0	0	0		0	0	0	0	0	0	0	0		0	0	0	0	0	0	0	0		0	0	0
4.8	-3.33333e-05	0.000135417	-2.08333e-06	6.66667e-05	0.000102083	0.00021875	-9.58333e-05	3.95833e-05		4.8	0	0	0	0	0	0	0	0		0	0	0	0	0	0	0	0		0	0	0	0	0	0	0	0		0	0	0	0	0	0	0	0		0	0	0
5	0.000166667	-0.000164583	-5.20833e-05	0.000166667	0.000302083	6.875e-05	4.16667e-06	-0.000160417		5	0	0	0	0	0	0	0	0		0	0	0	0	0	0	0	0		0	0	0	0	0	0	0	0		0	0	0	0	0	0	0	0		0	0	0
5.2	1.66667e-05	-1.45833e-05	-0.000102083	-8.33333e-05	0.000102083	-3.125e-05	4.16667e-06	-1.04167e-05		5.2	0	0	0	0	0	0	0	0		0	0	0	0	0	0	0	0		0	0	0	0	0	0	0	0		0	0	0	0	0	0	0	0		0	0	0
5.4	-0.000183333	-1.45833e-05	-2.08333e-06	-0.000183333	-4.79167e-05	1.875e-05	5.41667e-05	-1.04167e-05		5.4	0	0	0	0	0	0	0	0		0	0	0	0	0	0	0	0		0	0	0	0	0	0	0	0		0	0	0	0	0	0	0	0		0	0	0
5.6	1.66667e-05	0.000135417	-5.20833e-05	-8.33333e-05	-0.000147917	-0.00013125	0.000154167	0.000189583		5.6	0	0	0	0	0	0	0	0		0	0	0	0	0	0	0	0		0	0	0	0	0	0	0	0		0	0	0	0	0	0	0	0		0	0	0
5.8	-8.33333e-05	-0.000114583	4.79167e-05	-8.33333e-05	-0.000147917	-3.125e-05	-0.000145833	-1.04167e-05		5.8	0	0	0	0	0	0	0	0		0	0	0	0	0	0	0	0		0	0	0	0	0	0	0	0		0	0	0	0	0	0	0	0		0	0	0
6	6.66667e-05	-0.000164583	-5.20833e-05	1.66667e-05	-0.000147917	-0.00013125	-0.000145833	-0.000110417		6	0	0	0	0	0	0	0	0		0	0	0	0	0	0	0	0		0	0	0	0	0	0	0	0		0	0	0	0	0	0	0	0		0	0	0
6.2	-0.000133333	3.54167e-05	-5.20833e-05	-3.33333e-05	-0.000147917	6.875e-05	4.16667e-06	0.000139583		6.2	0	0	0	0	0	0	0	0		0	0	0	0	0	0	0	0		0	0	0	0	0	0	0	0		0	0	0	0	0	0	0	0		0	0	0
6.4	-0.000133333	0.000185417	-0.000102083	-3.33333e-05	-0.000147917	-8.125e-05	4.16667e-06	8.95833e-05		6.4	0	0	0	0	0	0	0	0		0	0	0	0	0	0	0	0		0	0	0	0	0	0	0	0		0	0	0	0	0	0	0	0		0	0	0
6.6	-8.33333e-05	-0.000114583	4.79167e-05	1.66667e-05	-0.000147917	6.875e-05	5.41667e-05	-0.000160417		6.6	0	0	0	0	0	0	0	0		0	0	0	0	0	0	0	0		0	0	0	0	0	0	0	0		0	0	0	0	0	0	0	0		0	0	0
6.8	-0.000133333	-6.45833e-05	-5.20833e-05	6.66667e-05	-4.79167e-05	-3.125e-05	0.000104167	3.95833e-05		6.8	0	0	0	0	0	0	0	0		0	0	0	0	0	0	0	0		0	0	0	0	0	0	0	0		0	0	0	0	0	0	0	0		0	0	0
7	6.66667e-05	3.54167e-05	-2.08333e-06	0.000316667	-4.79167e-05	0.00011875	0.000354167	-1.04167e-05		7	0	0	0	0	0	0	0	0		0	0	0	0	0	0	0	0		0	0	0	0	0	0	0	0		0	0	0	0	0	0	0	0		0	0	0
7.2	1.66667e-05	-0.000114583	-2.08333e-06	-0.000133333	-4.79167e-05	1.875e-05	-0.000145833	0.000189583		7.2	0	0	0	0	0	0	0	0		0	0	0	0	0	0	0	0		0	0	0	0	0	0	0	0		0	0	0	0	0	0	0	0		0	0	0
7.4	0.000216667	-0.000114583	9.79167e-05	-8.33333e-05	-0.000197917	0.00021875	-4.58333e-05	-1.04167e-05		7.4	0	0	0	0	0	0	0	0		0	0	0	0	0	0	0	0		0	0	0	0	0	0	0	0		0	0	0	0	0	0	0	0		0	0	0
7.6	-8.33333e-05	3.54167e-05	0.000147917	-8.33333e-05	2.08333e-06	1.875e-05	4.16667e-06	-6.04167e-05		7.6	0	0	0	0	0	0	0	0		0	0	0	0	0	0	0	0		0	0	0	0	0	0	0	0		0	0	0	0	0	0	0	0		0	0	0
7.8	-0.000183333	3.54167e-05	0.000147917	-3.33333e-05	5.20833e-05	6.875e-05	-4.58333e-05	0.000139583		7.8	0	0	0	0	0	0	0	0		0	0	0	0	0	0	0	0		0	0	0	0	0	0	0	0		0	0	0	0	0	0	0	0		0	0	0
8	1.66667e-05	-0.000114583	0.000247917	-3.33333e-05	2.08333e-06	1.875e-05	5.41667e-05	-6.04167e-05		8	0	0	0	0	0	0	0	0		0	0	0	0	0	0	0	0		0	0	0	0	0	0	0	0		0	0	0	0	0	0	0	0		0	0	0
8.2	-8.33333e-05	-6.45833e-05	0.000297917	-3.33333e-05	2.08333e-06	-0.00013125	0.000154167	-0.000210417		8.2	0	0	0	0	0	0	0	0		0	0	0	0	0	0	0	0		0	0	0	0	0	0	0	0		0	0	0	0	0	0	0	0		0	0	0
8.4	0.000116667	-1.45833e-05	0.000447917	1.66667e-05	2.08333e-06	-3.125e-05	-0.000145833	3.95833e-05		8.4	0	0	0	0	0	0	0	0		0	0	0	0	0	0	0	0		0	0	0	0	0	0	0	0		0	0	0	0	0	0	0	0		0	0	0
8.6	1.66667e-05	3.54167e-05	0.000447917	1.66667e-05	-4.79167e-05	-0.00018125	-0.000145833	-1.04167e-05		8.6	0	0	0	0	0	0	0	0		0	0	0	0	0	0	0	0		0	0	0	0	0	0	0	0		0	0	0	0	0	0	0	0		0	0	0
8.8	-0.000183333	-0.000214583	0.000247917	0.000116667	5.20833e-05	1.875e-05	-4.58333e-05	0.000289583		8.8	0	0	0	0	0	0	0	0		0	0	0	0	0	0	0	0		0	0	0	0	0	0	0	0		0	0	0	0	0	0	0	0		0	0	0
9	-3.33333e-05	-6.45833e-05	0.000247917	1.66667e-05	2.08333e-06	-0.00018125	4.16667e-06	-6.04167e-05		9	0	0	0	0	0	0	0	0		0	0	0	0	0	0	0	0		0	0	0	0	0	0	0	0		0	0	0	0	0	0	0	0		0	0	0
9.2	-8.33333e-05	-0.000114583	0.000197917	-0.000133333	2.08333e-06	6.875e-05	4.16667e-06	-6.04167e-05		9.2	0	0	0	0	0	0	0	0		0	0	0	0	0	0	0	0		0	0	0	0	0	0	0	0		0	0	0	0	0	0	0	0		0	0	0
9.4	6.66667e-05	3.54167e-05	0.000247917	-8.33333e-05	5.20833e-05	-8.125e-05	0.000104167	0.000139583		9.4	0	0	0	0	0	0	0	0		0	0	0	0	0	0	0	0		0	0	0	0	0	0	0	0		0	0	0	0	0	0	0	0		0	0	0
9.6	-3.33333e-05	-0.000214583	0.000197917	-8.33333e-05	0.000102083	0.00011875	0.000154167	-6.04167e-05		9.6	0	0	0	0	0	0	0	0		0	0	0	0	0	0	0	0		0	0	0	0	0	0	0	0		0	0	0	0	0	0	0	0		0	0	0
9.8	1.66667e-05	-6.45833e-05	0.000197917	-3.33333e-05	5.20833e-05	-3.125e-05	-0.000195833	-0.000160417		9.8	0	0	0	0	0	0	0	0		0	0	0	0	0	0	0	0		0	0	0	0	0	0	0	0		0	0	0	0	0	0	0	0		0	0	0
10	-8.33333e-05	-6.45833e-05	0.000147917	-3.33333e-05	0.000202083	0.00011875	-4.58333e-05	3.95833e-05		10	0	0	0	0	0	0	0	0		0	0	0	0	0	0	0	0		0	0	0	0	0	0	0	0		0	0.0057	0	0	0	0	0	0		0	0	0
10.2	-0.000183333	8.54167e-05	0.000147917	-8.33333e-05	5.20833e-05	6.875e-05	-4.58333e-05	-1.04167e-05		10.2	0	0	0	0	0	0	0	0		0	0	0	0	0	0	0	0		0	0	0	0	0	0	0	0		0.0051	0.0177	0	0	0	0	0	0		0	0	0
10.4	1.66667e-05	-0.000164583	0.000147917	-3.33333e-05	-0.000147917	0.00026875	-4.58333e-05	0.000239583		10.4	0	0	0	0	0	0	0	0		0	0	0	0	0	0	0	0		0	0	0	0	0	0	0	0		0.0177	0.0231	0.0076	0	0	0	0	0		0	0	0
10.6	-8.33333e-05	0.0137354	0.000147917	6.66667e-05	-0.000147917	6.875e-05	4.16667e-06	-1.04167e-05		10.6	0	0	0	0	0	0	0	0		0	0	0	0	0	0	0	0		0	0.0121	0	0	0	0	0	0		0.0237	0.0267	0.0185	0	0	0	0	0		0	0	0
10.8	0.00841667	0.0145854	0.000147917	0.000116667	-0.000197917	-8.125e-05	0.000154167	-6.04167e-05		10.8	0	0.0318	0	0	0	0	0	0		0	0.0377	0	0	0	0	0	0		0	0.0371	0	0	0	0	0	0		0.0275	0.0296	0.0244	0	0	0	0	0		0	0.0318	0
11	0.0115667	0.0161854	0.00574792	-0.000133333	-0.000197917	-3.125e-05	-9.58333e-05	8.95833e-05		11	0	0.0287	0	0	0	0	0	0		0	0.0444	0	0	0	0	0	0		0.0409	0.0655	0	0	0	0	0	0		0.0302	0.0318	0.0283	0.0102	0	0.0032	0	0		0	0.029	0
11.2	0.0124667	0.0204354	0.0185479	-0.000183333	-0.000147917	-0.00013125	-0.000145833	-1.04167e-05		11.2	0.033	0.0701	0	0	0	0	0	0		0.0361	0.0755	0	0	0	0	0	0		0.0463	0.0791	0.0434	0	0	0	0	0		0.0324	0.0337	0.0312	0.0164	0	0.0181	0	0		0.033	0.0698	0
11.4	0.0140667	0.0311854	0.0208479	1.66667e-05	-0.000147917	-3.125e-05	4.16667e-06	-0.000160417		11.4	0.0567	0.0762	0.0361	0	0	0	0	0		0.0611	0.0788	0.0365	0	0	0	0	0		0.0587	0.079	0.0534	0	0	0	0	0		0.0342	0.0352	0.0335	0.021	0.0124	0.0237	0.008	0		0.0579	0.0766	0.0371
11.6	0.0169667	0.0344854	0.0205979	0.00571667	-9.79167e-05	-0.00018125	4.16667e-06	3.95833e-05		11.6	0.0629	0.0775	0.0464	0	0	0	0	0		0.0634	0.0732	0.0755	0	0	0	0	0		0.069	0.0805	0.0624	0	0	0	0	0		0.0357	0.0365	0.0354	0.0244	0.0178	0.0275	0.017	0		0.0625	0.0777	0.0318
11.8	0.0192667	0.0433354	0.0209979	0.00621667	0.00110208	1.875e-05	-4.58333e-05	-1.04167e-05		11.8	0.0657	0.0815	0.0599	0	0	0	0	0		0.0721	0.0779	0.0618	0	0	0	0	0		0.0744	0.0833	0.0654	0.0305	0	0.0187	0	0		0.0368	0.0376	0.0369	0.0268	0.0209	0.0303	0.0224	0		0.0644	0.0803	0.0604
12	0.0206667	0.0418854	0.0242979	0.0123167	0.00745208	0.0118687	0.000104167	0.000139583		12	0.0721	0.0847	0.0504	0.0247	0	0	0	0		0.0717	0.0818	0.0567	0.0252	0	0	0	0		0.074	0.0837	0.0761	0.0263	0.006	0.0238	0	0		0.0377	0.0385	0.0381	0.0287	0.0232	0.0324	0.0254	0.012		0.0723	0.085	0.043
12.2	0.0227667	0.0426854	0.0269479	0.0175167	0.00855208	0.0162688	0.000104167	-6.04167e-05		12.2	0.0729	0.0876	0.0642	0.0212	0	0.0109	0	0		0.0729	0.0848	0.0722	0.0231	0	0.0142	0	0		0.0749	0.0861	0.0821	0.0372	0.0216	0.0426	0.0042	0		0.0384	0.0391	0.0391	0.0301	0.025	0.034	0.0277	0.0185		0.0723	0.0858	0.0443
12.4	0.0370167	0.0522854	0.0327979	0.0184667	0.0101521	0.0425188	0.000104167	-0.000110417		12.4	0.0753	0.0882	0.0867	0.0442	0.014	0.028	0	0		0.0724	0.0881	0.0854	0.0431	0.0157	0.0311	0	0		0.0778	0.0882	0.08	0.0435	0.0306	0.0364	0.0168	0		0.039	0.0396	0.0399	0.0313	0.0264	0.0353	0.0293	0.0218		0.0741	0.0875	0.0851
12.6	0.0513167	0.0502354	0.0474979	0.0211167	0.0144521	0.0484187	0.00265417	0.000189583		12.6	0.0771	0.0872	0.0822	0.0372	0.0129	0.0297	0.0104	0		0.0739	0.0906	0.0827	0.0441	0.0136	0.0298	0.0101	0		0.0803	0.0893	0.0806	0.0454	0.034	0.0397	0.0148	0		0.0394	0.04	0.0405	0.0322	0.0276	0.0363	0.0306	0.024		0.0765	0.0866	0.0801
12.8	0.0504667	0.0502854	0.0529479	0.0242667	0.0290021	0.0415688	0.00795417	3.95833e-05		12.8	0.0793	0.0885	0.0835	0.0257	0.0217	0.0356	0.0058	0		0.076	0.092	0.0844	0.0347	0.0302	0.0353	0.0116	0		0.0804	0.0893	0.0839	0.0521	0.0342	0.0434	0.0287	0		0.0397	0.0403	0.041	0.033	0.0285	0.0371	0.0317	0.0258		0.0784	0.0872	0.0792
13	0.0553667	0.0600354	0.0574979	0.0306667	0.0300021	0.0506187	0.0110042	8.95833e-05		13	0.0794	0.0889	0.0834	0.0234	0.016	0.0378	0.0106	0		0.0775	0.0906	0.0849	0.0353	0.0305	0.0393	0.013	0		0.0802	0.0886	0.0852	0.0582	0.0361	0.0444	0.0361	0		0.04	0.0405	0.0413	0.0336	0.0293	0.0378	0.0327	0.0275		0.0782	0.0877	0.0797
13.2	0.0586167	0.0664354	0.0571479	0.0410167	0.0310021	0.0502187	0.0187042	0.00468958		13.2	0.0812	0.0878	0.0847	0.0332	0.0185	0.0368	0.0246	0		0.0795	0.0891	0.0853	0.0624	0.0347	0.0394	0.0296	0		0.0788	0.0877	0.0843	0.0557	0.0374	0.0453	0.0317	0.0111		0.0401	0.0407	0.0416	0.0342	0.03	0.0384	0.0335	0.0291		0.0785	0.087	0.0804
13.4	0.0588667	0.0807854	0.0616979	0.0453167	0.0312521	0.0530187	0.0261042	0.00548958		13.4	0.0836	0.0872	0.0854	0.0638	0.0322	0.0402	0.023	0		0.0819	0.0884	0.0854	0.0655	0.037	0.0419	0.0256	0.004		0.0787	0.0862	0.0844	0.055	0.0388	0.0466	0.0357	0.0098		0.0402	0.0408	0.0419	0.0346	0.0307	0.0389	0.0343	0.0306		0.081	0.0863	0.0837
13.6	0.0640167	0.0999354	0.0680979	0.0525667	0.0360521	0.0475187	0.0272042	0.00668958		13.6	0.0835	0.087	0.085	0.0663	0.0362	0.0385	0.0249	0.0059		0.0827	0.0877	0.0854	0.0618	0.039	0.0423	0.0313	0.0072		0.0786	0.0854	0.0836	0.0562	0.0398	0.0484	0.0398	0.0148		0.0403	0.0408	0.042	0.035	0.0313	0.0393	0.0349	0.0319		0.0814	0.0858	0.0822
13.8	0.0648667	0.103835	0.0648979	0.0567167	0.0328521	0.0536188	0.0282042	0.00648958		13.8	0.0824	0.0867	0.085	0.062	0.0369	0.0382	0.0245	0.0091		0.0811	0.087	0.085	0.0596	0.0398	0.0411	0.0312	0.0096		0.078	0.0847	0.0823	0.057	0.0404	0.0496	0.0407	0.0177		0.0403	0.0408	0.0422	0.0353	0.0317	0.0397	0.0355	0.0329		0.081	0.0856	0.082
14	0.0703667	0.104885	0.0633479	0.0576667	0.0339021	0.0509688	0.0254042	0.00568958		14	0.0815	0.0877	0.0847	0.0591	0.036	0.0386	0.0307	0.0085		0.0795	0.0873	0.0846	0.0596	0.0397	0.0408	0.0344	0.0166		0.0781	0.084	0.0818	0.0581	0.0407	0.0501	0.0416	0.0168		0.0403	0.0408	0.0423	0.0356	0.0321	0.04	0.036	0.0338		0.0803	0.0862	0.0819
14.2	0.0714667	0.0901354	0.0626479	0.0662667	0.0311521	0.0590688	0.0255042	0.00778958		14.2	0.0811	0.0885	0.0846	0.0594	0.0362	0.0395	0.0298	0.0114		0.0787	0.0874	0.0838	0.0596	0.0392	0.0419	0.0328	0.0127		0.0776	0.0826	0.0809	0.0595	0.0422	0.0511	0.0429	0.0179		0.0403	0.0407	0.0423	0.0358	0.0324	0.0403	0.0363	0.0345		0.0802	0.0867	0.082
14.4	0.0730167	0.0811354	0.0613979	0.0728667	0.0369521	0.0615688	0.0277042	0.00593958		14.4	0.0805	0.0888	0.0843	0.0601	0.0371	0.0383	0.0309	0.0118		0.0783	0.0876	0.0837	0.0603	0.0391	0.0436	0.0345	0.0124		0.0774	0.0834	0.0802	0.0599	0.0434	0.0518	0.0431	0.0179		0.0402	0.0406	0.0423	0.0359	0.0326	0.0404	0.0366	0.0351		0.0796	0.0873	0.0817
14.6	0.0664667	0.0796854	0.0649979	0.0659667	0.0374521	0.0549688	0.0339542	0.00478958		14.6	0.0801	0.0884	0.0846	0.0621	0.0386	0.038	0.0311	0.0125		0.0777	0.0874	0.0839	0.0613	0.0396	0.0451	0.0358	0.0141		0.0764	0.0828	0.0806	0.0596	0.0429	0.0524	0.0443	0.0189		0.0401	0.0405	0.0423	0.036	0.0328	0.0406	0.0369	0.0356		0.0792	0.0874	0.0822
14.8	0.0705167	0.0702354	0.0713979	0.0628667	0.0395521	0.0575688	0.0326042	0.0101896		14.8	0.0802	0.0879	0.0853	0.0603	0.0408	0.0387	0.0333	0.0114		0.0776	0.0872	0.0844	0.0622	0.0403	0.0459	0.0365	0.0142		0.0764	0.081	0.0798	0.0597	0.0424	0.0532	0.0448	0.0191		0.04	0.0404	0.0422	0.0361	0.0329	0.0407	0.037	0.0359		0.0791	0.087	0.0827
15	0.0714167	0.0808354	0.0706479	0.0600167	0.0395521	0.0593187	0.0361042	0.0113896		15	0.0794	0.0873	0.0855	0.0588	0.0422	0.039	0.033	0.0114		0.0772	0.0868	0.0841	0.0629	0.0412	0.0468	0.0369	0.0136		0.0762	0.0813	0.0787	0.0596	0.0428	0.054	0.0452	0.019		0.0398	0.0402	0.0421	0.0361	0.033	0.0407	0.0371	0.0362		0.0786	0.0867	0.083
15.2	0.0700167	0.0779354	0.0666979	0.0634667	0.0364521	0.0613687	0.0398542	0.00853958		15.2	0.0785	0.087	0.0847	0.0582	0.0431	0.0385	0.035	0.0125		0.0768	0.0863	0.0833	0.0632	0.0418	0.0473	0.0379	0.0146		0.0758	0.0798	0.0791	0.0592	0.0433	0.0539	0.0455	0.0193		0.0397	0.04	0.042	0.036	0.033	0.0407	0.0372	0.0364		0.0779	0.0863	0.0826
15.4	0.0714167	0.0752854	0.0634979	0.0632667	0.0340521	0.0527688	0.0355542	0.00673958		15.4	0.0781	0.0863	0.0841	0.0594	0.0433	0.0385	0.0364	0.013		0.076	0.0857	0.0826	0.0633	0.0417	0.0476	0.0385	0.0145		0.0746	0.0782	0.0783	0.0597	0.0434	0.0536	0.0458	0.0206		0.0395	0.0399	0.0419	0.036	0.033	0.0407	0.0372	0.0365		0.0771	0.0858	0.082
15.6	0.0734667	0.0771354	0.0663979	0.0655667	0.0370021	0.0539187	0.0368042	0.00553958		15.6	0.0778	0.0855	0.0834	0.0598	0.0429	0.039	0.0366	0.0134		0.0759	0.0847	0.0819	0.0627	0.0416	0.0476	0.0389	0.0147		0.0744	0.0774	0.0769	0.06	0.0443	0.0538	0.0459	0.0268		0.0393	0.0397	0.0417	0.0359	0.0329	0.0406	0.0372	0.0366		0.0768	0.0848	0.0816
15.8	0.0733167	0.0753854	0.0696979	0.0672667	0.0391521	0.0608687	0.0399042	0.00863958		15.8	0.0779	0.0844	0.0824	0.0599	0.043	0.0403	0.0364	0.0134		0.0759	0.0838	0.0808	0.0621	0.0415	0.0475	0.0394	0.015		0.0744	0.0764	0.0765	0.0594	0.0449	0.0539	0.0463	0.0309		0.0391	0.0395	0.0416	0.0358	0.0328	0.0405	0.0371	0.0367		0.0767	0.0839	0.0808
16	0.0724667	0.0785854	0.0715479	0.0697667	0.0365521	0.0568687	0.0390542	0.0102896		16	0.0778	0.0835	0.0818	0.0604	0.0424	0.0415	0.0366	0.0131		0.0756	0.083	0.0803	0.0615	0.0414	0.0475	0.0398	0.0158		0.0745	0.0767	0.0757	0.0588	0.0445	0.0534	0.047	0.0315		0.0389	0.0393	0.0414	0.0357	0.0327	0.0404	0.0371	0.0367		0.0767	0.083	0.08
16.2	0.0722667	0.0750354	0.0678979	0.0679667	0.0357021	0.0653688	0.0362542	0.0115396		16.2	0.0774	0.0825	0.0811	0.0604	0.0418	0.0424	0.0367	0.0131		0.0755	0.0821	0.0799	0.0612	0.0417	0.0477	0.0408	0.0206		0.0751	0.0754	0.0757	0.0588	0.0449	0.0533	0.0471	0.0323		0.0387	0.0391	0.0413	0.0355	0.0326	0.0403	0.037	0.0366		0.0767	0.082	0.0795
16.4	0.0714167	0.0798354	0.0635979	0.0665167	0.0343521	0.0634688	0.0396042	0.0226396		16.4	0.0771	0.0818	0.0807	0.0605	0.0413	0.0434	0.0376	0.0146		0.0748	0.0817	0.0795	0.0613	0.0426	0.048	0.0416	0.0207		0.0741	0.075	0.0757	0.0594	0.0462	0.0539	0.0474	0.0323		0.0385	0.0389	0.0411	0.0354	0.0325	0.0402	0.0369	0.0365		0.0764	0.0816	0.0792
16.6	0.0757167	0.0795854	0.0657979	0.0678667	0.0404021	0.0534188	0.0397542	0.0157896		16.6	0.0764	0.0816	0.0806	0.0604	0.0415	0.0438	0.0395	0.0166		0.0742	0.0813	0.0795	0.0616	0.0439	0.0487	0.0424	0.0205		0.0743	0.0764	0.0754	0.0606	0.0468	0.0546	0.0478	0.0326		0.0384	0.0387	0.0409	0.0352	0.0323	0.04	0.0367	0.0365		0.0761	0.081	0.079
16.8	0.0736167	0.0795354	0.0666979	0.0710667	0.0411521	0.0536688	0.0440042	0.0108396		16.8	0.0758	0.0815	0.0807	0.0604	0.043	0.044	0.04	0.0168		0.0739	0.0813	0.0795	0.0624	0.0442	0.0491	0.0426	0.0226		0.0747	0.0752	0.0761	0.0607	0.0472	0.0552	0.048	0.033		0.0382	0.0385	0.0407	0.0351	0.0322	0.0399	0.0366	0.0364		0.0753	0.0807	0.0788
17	0.0707167	0.0790354	0.0704979	0.0731667	0.0393521	0.0560187	0.0465042	0.0157396		17	0.0754	0.0818	0.0805	0.0604	0.0447	0.0444	0.0396	0.0201		0.0735	0.0813	0.0794	0.0621	0.0439	0.0496	0.0422	0.0254		0.0743	0.0762	0.0766	0.0607	0.0469	0.0551	0.0483	0.0337		0.038	0.0384	0.0406	0.0349	0.0321	0.0397	0.0365	0.0362		0.0748	0.0807	0.0785
17.2	0.0716167	0.0801354	0.0677979	0.0695667	0.0405521	0.0577187	0.0456542	0.0189896		17.2	0.0755	0.0819	0.0802	0.0597	0.0446	0.0447	0.0381	0.0213		0.0735	0.0814	0.0792	0.0616	0.0434	0.0499	0.0419	0.0276		0.0742	0.076	0.0763	0.0609	0.0469	0.0552	0.0482	0.0339		0.0378	0.0382	0.0404	0.0347	0.0319	0.0396	0.0363	0.0361		0.0745	0.0809	0.0783
17.4	0.0689167	0.0817354	0.0684479	0.0669167	0.0388521	0.0670687	0.0424042	0.0181396		17.4	0.0756	0.0818	0.08	0.0595	0.044	0.0456	0.0378	0.0271		0.0735	0.0814	0.0792	0.0612	0.043	0.0497	0.042	0.0292		0.0743	0.0763	0.0764	0.0609	0.0475	0.0556	0.0482	0.0343		0.0376	0.038	0.0402	0.0346	0.0317	0.0394	0.0362	0.036		0.0745	0.0811	0.0782
17.6	0.0725167	0.0819354	0.0667979	0.0706667	0.0404021	0.0629187	0.0507042	0.0152896		17.6	0.0758	0.0817	0.08	0.0592	0.0435	0.046	0.0387	0.0283		0.0736	0.0813	0.079	0.0613	0.0431	0.0495	0.0422	0.0294		0.0745	0.0774	0.0768	0.0605	0.0475	0.0553	0.0485	0.0345		0.0375	0.0378	0.0401	0.0344	0.0316	0.0392	0.036	0.0358		0.0749	0.0809	0.0784
17.8	0.0732167	0.0800354	0.0713979	0.0671667	0.0387521	0.0644688	0.0488542	0.0302396		17.8	0.0755	0.0816	0.0801	0.0591	0.0431	0.0454	0.0393	0.0269		0.0736	0.0813	0.0789	0.0614	0.0434	0.0491	0.0426	0.0293		0.0743	0.0779	0.0772	0.0605	0.0474	0.055	0.0486	0.035		0.0373	0.0376	0.0399	0.0342	0.0314	0.0391	0.0358	0.0357		0.0748	0.0808	0.0786
18	0.0714667	0.0822354	0.0672979	0.0736167	0.0403021	0.0644187	0.0427042	0.0295396		18	0.075	0.0815	0.0801	0.0585	0.0432	0.0444	0.0402	0.0266		0.0735	0.0813	0.0789	0.0614	0.0438	0.0487	0.0432	0.03		0.0739	0.0775	0.0777	0.0609	0.0474	0.055	0.0487	0.0357		0.0371	0.0375	0.0397	0.0341	0.0312	0.0389	0.0357	0.0355		0.0744	0.0808	0.0786
18.2	0.0744167	0.0857354	0.0689479	0.0713667	0.0407521	0.0662188	0.0434042	0.0227396		18.2	0.0745	0.0812	0.0803	0.0582	0.0437	0.0435	0.0413	0.027		0.0734	0.0811	0.079	0.0612	0.0441	0.0486	0.0435	0.0313		0.0738	0.0772	0.0775	0.0611	0.0477	0.0555	0.0485	0.0364		0.0369	0.0373	0.0396	0.0339	0.0311	0.0388	0.0355	0.0354		0.074	0.0806	0.0787
18.4	0.0709667	0.0840354	0.0657979	0.0725167	0.0384021	0.0644187	0.0453542	0.0191896		18.4	0.0742	0.0808	0.08	0.0581	0.0444	0.0433	0.0421	0.0273		0.0729	0.0809	0.079	0.0612	0.0444	0.0486	0.0439	0.0324		0.0737	0.0777	0.0772	0.0609	0.0481	0.0556	0.0488	0.0369		0.0368	0.0371	0.0394	0.0338	0.0309	0.0386	0.0354	0.0352		0.0736	0.0801	0.0784
18.6	0.0699167	0.0804854	0.0621979	0.0687167	0.0356521	0.0622187	0.0447542	0.0221396		18.6	0.0741	0.0805	0.0792	0.0583	0.0447	0.0439	0.0418	0.0284		0.0729	0.0805	0.0785	0.0612	0.0447	0.0489	0.0439	0.0334		0.0732	0.0775	0.0772	0.0606	0.0477	0.0552	0.049	0.0374		0.0366	0.037	0.0392	0.0336	0.0308	0.0384	0.0352	0.0351		0.0734	0.0797	0.0777
18.8	0.0726667	0.0798854	0.0668979	0.0681667	0.0384521	0.0637687	0.0389542	0.0173396		18.8	0.0741	0.08	0.0785	0.0586	0.0448	0.0448	0.0413	0.0309		0.0729	0.0797	0.0781	0.0613	0.0449	0.0494	0.0439	0.0341		0.0726	0.0766	0.0771	0.0605	0.0476	0.0549	0.0488	0.0382		0.0365	0.0368	0.0391	0.0334	0.0306	0.0383	0.035	0.0349		0.0733	0.0794	0.0771
19	0.0710667	0.0833354	0.0696979	0.0681167	0.0408521	0.0702688	0.0414542	0.0156396		19	0.0739	0.0796	0.0779	0.0592	0.0448	0.0465	0.0414	0.0322		0.0727	0.079	0.0779	0.0613	0.0449	0.0498	0.0438	0.0348		0.0724	0.0769	0.0765	0.0604	0.0478	0.0549	0.0487	0.0387		0.0363	0.0367	0.0389	0.0333	0.0305	0.0381	0.0349	0.0347		0.0732	0.079	0.0767
19.2	0.0712667	0.0774854	0.0698479	0.0731667	0.0425521	0.0720688	0.0438542	0.0322396		19.2	0.0738	0.0795	0.078	0.0596	0.0446	0.0477	0.0421	0.0345		0.0723	0.0791	0.0774	0.0615	0.0448	0.0503	0.0437	0.0352		0.0723	0.0769	0.0761	0.0602	0.048	0.0551	0.0487	0.0389		0.0361	0.0365	0.0388	0.0331	0.0303	0.038	0.0347	0.0346		0.073	0.0788	0.0767
19.4	0.0710167	0.0795854	0.0655479	0.0706167	0.0432021	0.0730688	0.0456042	0.0192896		19.4	0.0738	0.0793	0.0783	0.0592	0.0447	0.047	0.0418	0.0353		0.0725	0.0786	0.0767	0.0616	0.0448	0.0505	0.0437	0.0354		0.0723	0.0768	0.0762	0.06	0.0477	0.0548	0.0489	0.0392		0.036	0.0363	0.0386	0.033	0.0301	0.0378	0.0346	0.0344		0.0731	0.0787	0.0768
19.6	0.0704167	0.0797354	0.0660979	0.0701167	0.0397021	0.0805188	0.0464042	0.0155396		19.6	0.0737	0.0792	0.0787	0.0591	0.0453	0.0459	0.0418	0.0346		0.0724	0.0781	0.0764	0.0616	0.0448	0.0505	0.044	0.0358		0.0723	0.0772	0.0763	0.06	0.0474	0.0546	0.0489	0.0394		0.0358	0.0362	0.0385	0.0328	0.03	0.0377	0.0344	0.0343		0.0731	0.0786	0.0769
19.8	0.0712667	0.0783854	0.0611479	0.0692667	0.0420021	0.0843688	0.0396542	0.0165896		19.8	0.0736	0.0792	0.0786	0.0592	0.0458	0.0451	0.0428	0.0341		0.0721	0.0783	0.077	0.0614	0.0447	0.0501	0.0443	0.0364		0.072	0.0769	0.0765	0.0602	0.0477	0.0549	0.0488	0.0395		0.0356	0.036	0.0383	0.0327	0.0298	0.0375	0.0343	0.0341		0.0731	0.0786	0.0769
20	0.0674167	0.0807354	0.0610979	0.0689167	0.0445521	0.0759688	0.0454542	0.0283896		20	0.0736	0.0793	0.0782	0.06	0.0459	0.0451	0.043	0.0335		0.0718	0.0781	0.077	0.0611	0.0446	0.0499	0.0446	0.0372		0.072	0.0765	0.0764	0.0602	0.048	0.0551	0.0489	0.0394		0.0355	0.0358	0.0381	0.0325	0.0297	0.0374	0.0341	0.034		0.073	0.0787	0.0768
20.2	0.0704667	0.0800354	0.0663479	0.0648167	0.0413021	0.0701187	0.0417542	0.0281896		20.2	0.0735	0.0793	0.0775	0.061	0.0454	0.0468	0.0433	0.0353		0.0716	0.0777	0.077	0.0609	0.0446	0.0499	0.045	0.0378		0.0717	0.0763	0.0762	0.0601	0.048	0.0551	0.049	0.0393		0.0353	0.0356	0.0379	0.0323	0.0295	0.0372	0.034	0.0338		0.0728	0.0786	0.0766
20.4	0.0689167	0.0807854	0.0690979	0.0656667	0.0396021	0.0663688	0.0463042	0.0243896		20.4	0.0732	0.079	0.0769	0.0615	0.0444	0.049	0.0444	0.0369		0.0713	0.0776	0.077	0.0608	0.0448	0.0502	0.0452	0.0378		0.0713	0.0758	0.0761	0.06	0.0479	0.055	0.0491	0.0395		0.0351	0.0354	0.0378	0.0321	0.0293	0.037	0.0338	0.0336		0.0725	0.0783	0.0764
20.6	0.0704667	0.0790354	0.0686979	0.0707667	0.0400021	0.0624188	0.0455042	0.0203396		20.6	0.0727	0.0788	0.0769	0.0615	0.0434	0.0501	0.0456	0.0376		0.0709	0.0769	0.0765	0.0607	0.0453	0.0504	0.0453	0.0374		0.0711	0.0754	0.0757	0.0599	0.0478	0.0549	0.049	0.0395		0.0349	0.0352	0.0376	0.032	0.0292	0.0368	0.0336	0.0335		0.072	0.0779	0.0762
20.8	0.0707667	0.0776354	0.0640479	0.0757667	0.0426021	0.0648187	0.0455542	0.0245396		20.8	0.072	0.0785	0.0773	0.0608	0.0435	0.0496	0.046	0.0381		0.0708	0.0767	0.0759	0.0608	0.0456	0.0508	0.0455	0.0371		0.0709	0.0749	0.0753	0.0599	0.0479	0.0549	0.0491	0.0394		0.0347	0.035	0.0374	0.0318	0.029	0.0367	0.0335	0.0333		0.0714	0.0776	0.0761
21	0.0722167	0.0821854	0.0617479	0.0734167	0.0405021	0.0587188	0.0419542	0.0279896		21	0.0714	0.0781	0.0776	0.0593	0.0451	0.0486	0.0455	0.0387		0.0705	0.0763	0.0755	0.0609	0.0457	0.0509	0.0455	0.037		0.0705	0.0745	0.075	0.0597	0.0479	0.0548	0.0491	0.0394		0.0345	0.0349	0.0372	0.0316	0.0288	0.0365	0.0333	0.0331		0.0709	0.0773	0.0759
21.2	0.0702167	0.0778854	0.0576979	0.0721667	0.0431521	0.0658688	0.0458542	0.0283896		21.2	0.071	0.0777	0.0775	0.0579	0.0475	0.0473	0.0445	0.0385		0.07	0.0758	0.0751	0.0608	0.0454	0.051	0.0453	0.0374		0.0701	0.0742	0.0747	0.0594	0.0476	0.0546	0.0491	0.0394		0.0343	0.0347	0.037	0.0314	0.0286	0.0363	0.0331	0.033		0.0705	0.0769	0.0756
21.4	0.0678667	0.0782854	0.0620979	0.0670167	0.0404021	0.0697687	0.0420542	0.0335396		21.4	0.071	0.0773	0.0768	0.0579	0.048	0.047	0.0437	0.0382		0.0697	0.0753	0.0747	0.0606	0.0449	0.0508	0.045	0.038		0.0698	0.0738	0.0744	0.0592	0.0474	0.0545	0.0489	0.0395		0.0341	0.0345	0.0368	0.0312	0.0285	0.0361	0.0329	0.0328		0.0704	0.0765	0.0752
21.6	0.0696667	0.0801854	0.0661979	0.0665167	0.0404021	0.0759187	0.0423042	0.0315896		21.6	0.0711	0.0768	0.0757	0.0589	0.047	0.0473	0.0426	0.0388		0.0693	0.0747	0.0745	0.0603	0.0446	0.0505	0.0446	0.0387		0.0694	0.0734	0.0739	0.0589	0.0474	0.0544	0.0487	0.0395		0.0339	0.0343	0.0366	0.0311	0.0283	0.036	0.0328	0.0326		0.0703	0.0759	0.0747
21.8	0.0707167	0.0798854	0.0676479	0.0726667	0.0373521	0.0711188	0.0436042	0.0322896		21.8	0.071	0.0763	0.0747	0.0599	0.0459	0.0479	0.0421	0.0374		0.0689	0.0744	0.0743	0.06	0.0444	0.05	0.0445	0.0391		0.0692	0.0729	0.0735	0.0587	0.0472	0.0542	0.0486	0.0395		0.0337	0.0341	0.0364	0.0309	0.0281	0.0358	0.0326	0.0325		0.0702	0.0755	0.0741
22	0.0710667	0.0750854	0.0644479	0.0708667	0.0405021	0.0637188	0.0465542	0.0315896		22	0.0705	0.0759	0.0742	0.0601	0.0447	0.0481	0.0429	0.0338		0.0687	0.0739	0.0739	0.0597	0.0443	0.0495	0.0444	0.0392		0.0689	0.0724	0.0731	0.0584	0.0469	0.054	0.0484	0.0395		0.0335	0.0339	0.0362	0.0307	0.0279	0.0356	0.0324	0.0323		0.0698	0.0752	0.0737
22.2	0.0701167	0.0768854	0.0594979	0.0683667	0.0393021	0.0649688	0.0422042	0.0279896		22.2	0.0698	0.0754	0.0742	0.0599	0.0441	0.0473	0.0438	0.0321		0.0684	0.0735	0.0736	0.0595	0.0443	0.0492	0.0445	0.0391		0.0684	0.0721	0.0727	0.0581	0.0466	0.0538	0.0482	0.0396		0.0333	0.0337	0.0361	0.0305	0.0277	0.0354	0.0322	0.0321		0.0694	0.075	0.0735
22.4	0.0674167	0.0801354	0.0594979	0.0642667	0.0423021	0.0629688	0.0411542	0.0235896		22.4	0.069	0.0749	0.0745	0.0591	0.0443	0.0459	0.0444	0.0334		0.0681	0.0733	0.0731	0.0593	0.0442	0.0491	0.0448	0.0389		0.0679	0.0718	0.0724	0.0578	0.0465	0.0536	0.048	0.0396		0.0331	0.0335	0.0359	0.0303	0.0275	0.0352	0.032	0.0319		0.069	0.0747	0.0735
22.6	0.0686667	0.0806854	0.0611479	0.0611167	0.0429021	0.0647687	0.0430542	0.0268396		22.6	0.0685	0.0744	0.0746	0.0586	0.0445	0.0451	0.0449	0.0358		0.0677	0.073	0.0727	0.0591	0.0442	0.0492	0.045	0.0387		0.0675	0.0713	0.072	0.0576	0.0463	0.0534	0.0479	0.0396		0.0329	0.0333	0.0357	0.0301	0.0274	0.035	0.0319	0.0317		0.0685	0.0742	0.0734
22.8	0.0664167	0.0792854	0.0637479	0.0652667	0.0394021	0.0612188	0.0425542	0.0332396		22.8	0.068	0.0739	0.074	0.0584	0.0445	0.0454	0.0453	0.0369		0.0673	0.0727	0.0724	0.0588	0.0443	0.0494	0.0452	0.0385		0.0671	0.0709	0.0716	0.0573	0.0461	0.0532	0.0478	0.0396		0.0328	0.0331	0.0355	0.0299	0.0272	0.0349	0.0317	0.0316		0.068	0.0738	0.0731
23	0.0683667	0.0776354	0.0686479	0.0703667	0.0393021	0.0668187	0.0417542	0.0351896		23	0.0678	0.0737	0.073	0.0584	0.0442	0.0467	0.0449	0.0376		0.0669	0.0724	0.0722	0.0586	0.0443	0.0497	0.0453	0.0386		0.0667	0.0706	0.0712	0.057	0.0459	0.053	0.0476	0.0396		0.0326	0.0329	0.0353	0.0298	0.027	0.0347	0.0315	0.0314		0.0676	0.0735	0.0725
23.2	0.0674167	0.0772354	0.0703479	0.0694667	0.0358021	0.0663688	0.0480042	0.0364896		23.2	0.0677	0.0735	0.0719	0.0587	0.0442	0.0484	0.0447	0.0388		0.0666	0.0721	0.0719	0.0585	0.0445	0.0499	0.0451	0.0385		0.0664	0.0703	0.0708	0.0568	0.0457	0.0528	0.0475	0.0396		0.0324	0.0328	0.0351	0.0296	0.0268	0.0345	0.0313	0.0312		0.0672	0.0731	0.0717
23.4	0.0707667	0.0806354	0.0630979	0.0720167	0.0399521	0.0658187	0.0467042	0.0336396		23.4	0.0674	0.0731	0.0712	0.0588	0.0446	0.05	0.0455	0.0396		0.0664	0.0718	0.0716	0.0583	0.0445	0.0501	0.0449	0.0385		0.0661	0.0701	0.0706	0.0565	0.0455	0.0526	0.0473	0.0395		0.0322	0.0326	0.035	0.0294	0.0266	0.0343	0.0311	0.031		0.0668	0.0727	0.0711
23.6	0.0676167	0.0766854	0.0600479	0.0709167	0.0482521	0.0697187	0.0455042	0.0299896		23.6	0.0671	0.0727	0.0711	0.0584	0.0451	0.05	0.0456	0.0389		0.0661	0.0716	0.0712	0.0582	0.0442	0.05	0.0445	0.0385		0.0659	0.0698	0.0704	0.0563	0.0453	0.0524	0.0471	0.0394		0.0321	0.0324	0.0348	0.0292	0.0265	0.0342	0.031	0.0308		0.0665	0.0725	0.0707
23.8	0.0669667	0.0775854	0.0579479	0.0652667	0.0439521	0.0713687	0.0449542	0.0317896		23.8	0.0667	0.0724	0.0716	0.0576	0.0454	0.0486	0.0442	0.0377		0.0658	0.0713	0.0709	0.058	0.0438	0.0498	0.0441	0.0385		0.0656	0.0695	0.0701	0.0561	0.0452	0.0523	0.047	0.0392		0.0319	0.0323	0.0347	0.0291	0.0263	0.034	0.0308	0.0307		0.0663	0.0722	0.0707
24	0.0682167	0.0736854	0.0579979	0.0705167	0.0423021	0.0694688	0.0381042	0.0286396		24	0.0663	0.0721	0.0721	0.0567	0.045	0.0467	0.0423	0.0383		0.0655	0.0711	0.0705	0.0577	0.0433	0.0493	0.0439	0.0384		0.0654	0.0692	0.0699	0.0559	0.045	0.0521	0.0468	0.0391		0.0318	0.0321	0.0345	0.0289	0.0262	0.0338	0.0306	0.0305		0.0661	0.0718	0.0707
24.2	0.0658667	0.0739854	0.0611979	0.0680167	0.0413521	0.0716188	0.0401542	0.0363396		24.2	0.066	0.0721	0.0723	0.0561	0.0443	0.0455	0.0415	0.0376		0.0652	0.0708	0.0702	0.0573	0.0429	0.0487	0.0436	0.0383		0.065	0.0689	0.0696	0.0557	0.0448	0.052	0.0467	0.0389		0.0316	0.032	0.0344	0.0288	0.026	0.0337	0.0305	0.0303		0.0659	0.0716	0.0707
24.4	0.0659667	0.0725854	0.0635479	0.0708667	0.0415521	0.0651188	0.0423542	0.0304396		24.4	0.0659	0.0722	0.0718	0.0559	0.0433	0.0453	0.0415	0.0351		0.0649	0.0706	0.0699	0.057	0.0427	0.0482	0.0435	0.0384		0.0648	0.0687	0.0693	0.0555	0.0446	0.0518	0.0465	0.0387		0.0315	0.0318	0.0342	0.0286	0.0258	0.0335	0.0303	0.0302		0.0658	0.0715	0.0704
24.6	0.0680167	0.0745854	0.0648979	0.0673167	0.0407521	0.0626188	0.0429042	0.0310396		24.6	0.0659	0.0722	0.0709	0.0561	0.0425	0.0452	0.0414	0.0332		0.0647	0.0704	0.0697	0.0567	0.0426	0.0477	0.0435	0.0386		0.0646	0.0685	0.0691	0.0553	0.0445	0.0517	0.0464	0.0386		0.0313	0.0317	0.0341	0.0285	0.0257	0.0334	0.0302	0.03		0.0657	0.0714	0.0702
24.8	0.0678167	0.0734354	0.0612979	0.0618167	0.0394021	0.0609687	0.0483042	0.0334896		24.8	0.0659	0.072	0.07	0.0564	0.0423	0.0454	0.0422	0.0337		0.0646	0.0703	0.0695	0.0566	0.0425	0.0475	0.0436	0.0387		0.0644	0.0683	0.0689	0.0551	0.0443	0.0515	0.0463	0.0385		0.0312	0.0315	0.0339	0.0283	0.0255	0.0332	0.03	0.0299		0.0655	0.0712	0.0699
25	0.0656167	0.0744854	0.0589979	0.0672667	0.0400521	0.0623187	0.0399042	0.0320896		25	0.0656	0.0717	0.0694	0.0566	0.0421	0.0458	0.0437	0.0353		0.0644	0.0702	0.0693	0.0565	0.0424	0.0475	0.0437	0.0385		0.0643	0.0682	0.0687	0.0549	0.0441	0.0513	0.0461	0.0384		0.031	0.0314	0.0338	0.0282	0.0254	0.0331	0.0299	0.0297		0.0652	0.0711	0.0696
25.2	0.0659167	0.0742854	0.0598479	0.0727167	0.0414021	0.0607188	0.0416042	0.0264896		25.2	0.0653	0.0714	0.0694	0.0568	0.0418	0.0463	0.0445	0.0362		0.0643	0.0699	0.0691	0.0563	0.0422	0.0476	0.0436	0.0382		0.0642	0.0681	0.0686	0.0547	0.044	0.0511	0.046	0.0382		0.0309	0.0312	0.0336	0.028	0.0252	0.0329	0.0297	0.0296		0.0649	0.071	0.0694
25.4	0.0673167	0.0754854	0.0599479	0.0664167	0.0398021	0.0700188	0.0416542	0.0279396		25.4	0.0649	0.071	0.0699	0.0567	0.0418	0.0468	0.0444	0.0366		0.0641	0.0696	0.0689	0.0561	0.0422	0.0478	0.0436	0.0378		0.064	0.0679	0.0684	0.0545	0.0439	0.051	0.0458	0.038		0.0307	0.0311	0.0335	0.0279	0.0251	0.0328	0.0296	0.0294		0.0647	0.0708	0.0693
25.6	0.0660667	0.0723354	0.0611979	0.0661167	0.0427521	0.0708687	0.0435042	0.0327396		25.6	0.0646	0.0705	0.0705	0.0563	0.0422	0.0468	0.0439	0.0369		0.0638	0.0693	0.0687	0.0559	0.0422	0.048	0.0435	0.0375		0.0638	0.0677	0.0683	0.0544	0.0438	0.0509	0.0456	0.0378		0.0306	0.0309	0.0333	0.0277	0.025	0.0327	0.0294	0.0293		0.0645	0.0705	0.0692
25.8	0.0683667	0.0737354	0.0621479	0.0625167	0.0382521	0.0686688	0.0397042	0.0303896		25.8	0.0645	0.0703	0.0707	0.0559	0.0433	0.0466	0.0436	0.0375		0.0635	0.069	0.0685	0.0557	0.0423	0.048	0.0435	0.0372		0.0636	0.0673	0.0681	0.0543	0.0436	0.0507	0.0455	0.0376		0.0304	0.0308	0.0332	0.0276	0.0248	0.0325	0.0293	0.0291		0.0643	0.0702	0.069
26	0.0657667	0.0744354	0.0613979	0.0610667	0.0405021	0.0644688	0.0372542	0.0276396		26	0.0643	0.0703	0.0702	0.0559	0.0439	0.0463	0.0431	0.0375		0.0632	0.0687	0.0682	0.0555	0.0424	0.0479	0.0434	0.0371		0.0633	0.067	0.0678	0.0542	0.0435	0.0506	0.0454	0.0374		0.0302	0.0306	0.033	0.0274	0.0247	0.0324	0.0292	0.029		0.064	0.07	0.0686
26.2	0.0648667	0.0743354	0.0598979	0.0676167	0.0440521	0.0654187	0.0403042	0.0310396		26.2	0.0643	0.0702	0.0694	0.0557	0.0439	0.0461	0.0421	0.037		0.0629	0.0683	0.0679	0.0554	0.0423	0.0478	0.0432	0.0371		0.0629	0.0666	0.0675	0.054	0.0433	0.0505	0.0452	0.0372		0.0301	0.0304	0.0329	0.0273	0.0245	0.0322	0.029	0.0288		0.0638	0.0697	0.0684
26.4	0.0633667	0.0702354	0.0603979	0.0709667	0.0408021	0.0636687	0.0407542	0.0342896		26.4	0.0642	0.0699	0.0686	0.0554	0.0434	0.0459	0.0413	0.0369		0.0626	0.0679	0.0676	0.0553	0.042	0.0477	0.0428	0.0372		0.0625	0.0662	0.0671	0.0537	0.0431	0.0503	0.0451	0.037		0.0299	0.0303	0.0327	0.0271	0.0244	0.0321	0.0289	0.0287		0.0636	0.0692	0.0682
26.6	0.0613667	0.0751354	0.0594479	0.0659167	0.0356021	0.0615188	0.0418542	0.0251396		26.6	0.0637	0.0694	0.068	0.0549	0.0425	0.046	0.041	0.0374		0.0623	0.0675	0.0673	0.0552	0.0416	0.0475	0.0425	0.0373		0.0622	0.0658	0.0668	0.0535	0.0429	0.05	0.0449	0.0368		0.0298	0.0302	0.0326	0.027	0.0242	0.0319	0.0287	0.0285		0.0632	0.0687	0.068
26.8	0.0672667	0.0732854	0.0591479	0.0642667	0.0354021	0.0618187	0.0421542	0.0279896		26.8	0.063	0.0688	0.0678	0.0547	0.0415	0.046	0.0411	0.0364		0.0619	0.0671	0.067	0.055	0.0412	0.0472	0.0422	0.0372		0.0618	0.0654	0.0664	0.0532	0.0427	0.0498	0.0447	0.0366		0.0297	0.03	0.0324	0.0268	0.0241	0.0318	0.0286	0.0284		0.0627	0.0683	0.0677
27	0.0649167	0.0719854	0.0597979	0.0653167	0.0386021	0.0628188	0.0390542	0.0308396		27	0.0624	0.0682	0.0681	0.0543	0.0407	0.0452	0.0412	0.0335		0.0616	0.0667	0.0666	0.0547	0.0408	0.0468	0.0419	0.037		0.0614	0.065	0.066	0.0529	0.0424	0.0496	0.0445	0.0364		0.0295	0.0299	0.0323	0.0267	0.0239	0.0316	0.0284	0.0282		0.0623	0.0679	0.0675
27.2	0.0600167	0.0711354	0.0599979	0.0686167	0.0366521	0.0671188	0.0421542	0.0284396		27.2	0.062	0.0677	0.0682	0.0536	0.0407	0.0439	0.041	0.0324		0.0612	0.0663	0.0663	0.0544	0.0405	0.0463	0.0417	0.0367		0.0611	0.0647	0.0656	0.0526	0.0422	0.0493	0.0443	0.0362		0.0294	0.0298	0.0322	0.0266	0.0238	0.0315	0.0283	0.0281		0.062	0.0675	0.0672
27.4	0.0662667	0.0746854	0.0592979	0.0642667	0.0405021	0.0703688	0.0406042	0.0296396		27.4	0.0617	0.0674	0.0677	0.0532	0.0412	0.0429	0.0414	0.0331		0.0609	0.0661	0.066	0.054	0.0403	0.0459	0.0416	0.0365		0.0608	0.0644	0.0653	0.0523	0.042	0.0491	0.0441	0.0361		0.0293	0.0297	0.0321	0.0264	0.0237	0.0314	0.0282	0.0279		0.0616	0.0672	0.0667
27.6	0.0610667	0.0709354	0.0585979	0.0635667	0.0384521	0.0698187	0.0395542	0.0329396		27.6	0.0616	0.0674	0.0667	0.0534	0.0414	0.0428	0.0417	0.0346		0.0607	0.066	0.0657	0.0537	0.04	0.0455	0.0415	0.0363		0.0607	0.0643	0.065	0.0521	0.0418	0.0489	0.0439	0.0359		0.0292	0.0296	0.0319	0.0263	0.0235	0.0312	0.028	0.0278		0.0615	0.067	0.0661
27.8	0.0649167	0.0703354	0.0605479	0.0631667	0.0373521	0.0693187	0.0415542	0.0293396		27.8	0.0617	0.0673	0.0657	0.0538	0.0412	0.0431	0.0412	0.0361		0.0605	0.0659	0.0655	0.0533	0.0399	0.0453	0.0415	0.0363		0.0606	0.0643	0.0648	0.0518	0.0416	0.0486	0.0437	0.0357		0.0291	0.0294	0.0318	0.0262	0.0234	0.0311	0.0279	0.0277		0.0615	0.0668	0.0655
28	0.0628167	0.0711354	0.0619479	0.0626667	0.0394021	0.0630687	0.0446542	0.0233896		28	0.0617	0.0671	0.065	0.0537	0.0405	0.0436	0.041	0.0368		0.0603	0.0658	0.0654	0.053	0.0398	0.0452	0.0414	0.0362		0.0605	0.0642	0.0647	0.0516	0.0414	0.0485	0.0435	0.0356		0.029	0.0293	0.0317	0.0261	0.0233	0.031	0.0278	0.0275		0.0613	0.0667	0.0651
28.2	0.0602167	0.0733354	0.0612979	0.0656167	0.0405521	0.0606187	0.0388042	0.0226896		28.2	0.0615	0.067	0.0649	0.0532	0.0398	0.0441	0.0414	0.0368		0.0602	0.0657	0.0652	0.0528	0.0398	0.0452	0.0414	0.036		0.0603	0.0641	0.0646	0.0514	0.0412	0.0483	0.0433	0.0354		0.0289	0.0292	0.0316	0.026	0.0232	0.0309	0.0277	0.0274		0.0612	0.0667	0.0649
28.4	0.0623167	0.0714854	0.0617979	0.0673167	0.0423021	0.0614687	0.0472042	0.0260396		28.4	0.0611	0.0668	0.0654	0.053	0.0395	0.0446	0.0419	0.0364		0.0601	0.0655	0.0651	0.0526	0.0398	0.0454	0.0414	0.0357		0.0601	0.064	0.0646	0.0514	0.0411	0.0482	0.0431	0.0353		0.0287	0.0291	0.0315	0.0258	0.0231	0.0308	0.0276	0.0273		0.061	0.0666	0.065
28.6	0.0640167	0.0743354	0.0598979	0.0617667	0.0393521	0.0602187	0.0398042	0.0310896		28.6	0.0608	0.0665	0.0664	0.0528	0.0399	0.0444	0.0418	0.0355		0.0598	0.0653	0.065	0.0526	0.0399	0.0455	0.0413	0.0353		0.0598	0.0639	0.0645	0.0513	0.041	0.0481	0.043	0.0351		0.0286	0.029	0.0314	0.0257	0.023	0.0307	0.0274	0.0272		0.0607	0.0664	0.0653
28.8	0.0632167	0.0721354	0.0591979	0.0606667	0.0368521	0.0635687	0.0402042	0.0327896		28.8	0.0606	0.0663	0.067	0.0526	0.0407	0.0441	0.0412	0.0341		0.0596	0.0651	0.0648	0.0525	0.0399	0.0456	0.0411	0.035		0.0596	0.0637	0.0643	0.0512	0.0409	0.048	0.0429	0.035		0.0285	0.0289	0.0313	0.0256	0.0228	0.0306	0.0273	0.0271		0.0604	0.0663	0.0655
29	0.0622667	0.0721854	0.0617479	0.0612667	0.0387021	0.0578188	0.0409542	0.0327896		29	0.0605	0.0663	0.0668	0.0525	0.0412	0.0441	0.0405	0.0329		0.0594	0.065	0.0647	0.0525	0.0397	0.0456	0.0409	0.0349		0.0595	0.0635	0.0642	0.051	0.0408	0.0479	0.0428	0.0349		0.0284	0.0288	0.0312	0.0255	0.0227	0.0305	0.0272	0.0269		0.0603	0.0661	0.0654
29.2	0.0631167	0.0727854	0.0602479	0.0618667	0.0400021	0.0609188	0.0421542	0.0399896		29.2	0.0605	0.0663	0.0662	0.0528	0.041	0.044	0.0392	0.0331		0.0593	0.0648	0.0645	0.0525	0.0395	0.0455	0.0406	0.0349		0.0593	0.0633	0.064	0.0509	0.0406	0.0478	0.0427	0.0348		0.0283	0.0286	0.031	0.0254	0.0226	0.0303	0.0271	0.0268		0.0602	0.0659	0.0652
29.4	0.0630667	0.0728354	0.0610479	0.0635167	0.0399521	0.0582188	0.0441042	0.0297396		29.4	0.0606	0.0663	0.0654	0.053	0.0405	0.044	0.0381	0.0333		0.0591	0.0645	0.0644	0.0523	0.0391	0.0452	0.0403	0.035		0.0592	0.0631	0.0639	0.0507	0.0405	0.0477	0.0426	0.0347		0.0282	0.0285	0.0309	0.0253	0.0225	0.0302	0.027	0.0267		0.0601	0.0657	0.0649
29.6	0.0600667	0.0734354	0.0596979	0.0634167	0.0375521	0.0576687	0.0416542	0.0243896		29.6	0.0605	0.066	0.0648	0.0527	0.0398	0.0441	0.0378	0.0332		0.0589	0.0642	0.0643	0.0522	0.0388	0.0449	0.0401	0.0351		0.0589	0.0628	0.0637	0.0506	0.0404	0.0476	0.0426	0.0345		0.028	0.0284	0.0308	0.0252	0.0224	0.0301	0.0269	0.0266		0.0598	0.0654	0.0647
29.8	0.0603667	0.0701354	0.0596979	0.0644667	0.0386021	0.0562188	0.0408042	0.0306896		29.8	0.0601	0.0656	0.0644	0.0523	0.039	0.0438	0.0382	0.0332		0.0587	0.0639	0.064	0.052	0.0386	0.0445	0.0399	0.0352		0.0587	0.0624	0.0635	0.0504	0.0403	0.0474	0.0425	0.0344		0.0279	0.0283	0.0307	0.0251	0.0223	0.03	0.0268	0.0265		0.0596	0.0651	0.0644
30	0.0608167	0.0685354	0.0578479	0.0688667	0.0380021	0.0558188	0.0412542	0.0270396		30	0.0596	0.0652	0.0645	0.052	0.0385	0.0431	0.0392	0.0342		0.0585	0.0636	0.0637	0.0518	0.0384	0.0441	0.0398	0.0351		0.0584	0.0621	0.0632	0.0503	0.0402	0.0473	0.0423	0.0342		0.0278	0.0281	0.0306	0.0249	0.0222	0.0299	0.0267	0.0264		0.0593	0.0648	0.0642
30.2	0.0639167	0.0693354	0.0598979	0.0645667	0.0396521	0.0588687	0.0425542	0.0336396		30.2	0.0591	0.0647	0.0648	0.0516	0.0385	0.0422	0.0401	0.0354		0.0582	0.0633	0.0634	0.0516	0.0383	0.0438	0.0397	0.0349		0.0581	0.0617	0.0629	0.0501	0.04	0.0472	0.0422	0.0341		0.0276	0.028	0.0304	0.0248	0.022	0.0298	0.0265	0.0263		0.0591	0.0645	0.064
30.4	0.0618167	0.0706354	0.0622979	0.0591667	0.0372521	0.0628188	0.0394042	0.0329396		30.4	0.0588	0.0644	0.0649	0.0513	0.0387	0.0413	0.0403	0.0361		0.058	0.063	0.0631	0.0513	0.0381	0.0435	0.0397	0.0346		0.0577	0.0614	0.0626	0.0499	0.0398	0.047	0.0421	0.0339		0.0275	0.0278	0.0303	0.0247	0.0219	0.0296	0.0264	0.0261		0.0589	0.0642	0.0638
30.6	0.0613667	0.0679354	0.0629479	0.0598667	0.0382521	0.0529688	0.0430042	0.0328896		30.6	0.0586	0.0641	0.0644	0.0513	0.0389	0.0409	0.0403	0.0353		0.0578	0.0628	0.0629	0.051	0.038	0.0433	0.0396	0.0343		0.0574	0.061	0.0622	0.0496	0.0396	0.0468	0.0419	0.0337		0.0273	0.0277	0.0301	0.0245	0.0218	0.0295	0.0263	0.026		0.0587	0.0639	0.0634
30.8	0.0592167	0.0731854	0.0618479	0.0579667	0.0391521	0.0536188	0.0382542	0.0333396		30.8	0.0586	0.0638	0.0636	0.0512	0.0389	0.0411	0.0399	0.0339		0.0575	0.0624	0.0627	0.0507	0.0378	0.0433	0.0395	0.034		0.057	0.0606	0.0619	0.0494	0.0394	0.0466	0.0417	0.0336		0.0272	0.0275	0.03	0.0244	0.0217	0.0294	0.0262	0.0259		0.0585	0.0635	0.063
31	0.0568167	0.0720354	0.0594979	0.0580167	0.0369021	0.0550187	0.0384042	0.0268396		31	0.0586	0.0636	0.0629	0.0509	0.0386	0.0414	0.0395	0.0333		0.0572	0.0621	0.0624	0.0505	0.0377	0.0433	0.0394	0.0338		0.0566	0.0602	0.0615	0.0491	0.0392	0.0464	0.0416	0.0334		0.027	0.0273	0.0298	0.0243	0.0215	0.0292	0.026	0.0258		0.0583	0.0632	0.0625
31.2	0.0598167	0.0688854	0.0572979	0.0586167	0.0366021	0.0514687	0.0420542	0.0308896		31.2	0.0585	0.0633	0.0623	0.0505	0.0383	0.0416	0.0394	0.033		0.0568	0.0618	0.0622	0.0503	0.0376	0.0433	0.0393	0.0336		0.0563	0.0598	0.0612	0.0488	0.039	0.0462	0.0414	0.0333		0.0268	0.0272	0.0297	0.0241	0.0214	0.0291	0.0259	0.0256		0.058	0.0629	0.0621
31.4	0.0607667	0.0698354	0.0567479	0.0634667	0.0385521	0.0548187	0.0373042	0.0320896		31.4	0.0581	0.0629	0.0621	0.0502	0.0382	0.042	0.0394	0.0325		0.0565	0.0614	0.0619	0.0501	0.0376	0.0433	0.0391	0.0334		0.0559	0.0593	0.0608	0.0485	0.0388	0.046	0.0412	0.0331		0.0267	0.027	0.0295	0.024	0.0213	0.029	0.0258	0.0255		0.0576	0.0626	0.0619
31.6	0.0588667	0.0680354	0.0559479	0.0576167	0.0384521	0.0544688	0.0394042	0.0386896		31.6	0.0575	0.0624	0.0623	0.0501	0.0384	0.0426	0.0393	0.0322		0.0561	0.0609	0.0615	0.0499	0.0375	0.0433	0.039	0.0331		0.0554	0.0588	0.0604	0.0483	0.0386	0.0458	0.041	0.033		0.0265	0.0269	0.0294	0.0238	0.0211	0.0288	0.0256	0.0254		0.0572	0.0622	0.0618
31.8	0.0611667	0.0663854	0.0560979	0.0552167	0.0385521	0.0515188	0.0387042	0.0297896		31.8	0.0569	0.0619	0.0627	0.0501	0.0385	0.043	0.0386	0.0325		0.0556	0.0603	0.0612	0.0497	0.0374	0.0432	0.0388	0.0328		0.055	0.0583	0.06	0.048	0.0384	0.0456	0.0409	0.0328		0.0264	0.0267	0.0293	0.0237	0.021	0.0287	0.0255	0.0252		0.0567	0.0618	0.0618
32	0.0590667	0.0670354	0.0563479	0.0552667	0.0386521	0.0525687	0.0393542	0.0394396		32	0.0563	0.0614	0.0628	0.05	0.0383	0.0428	0.0374	0.033		0.0552	0.0598	0.0607	0.0495	0.0371	0.0431	0.0386	0.0326		0.0545	0.0578	0.0596	0.0478	0.0382	0.0454	0.0407	0.0327		0.0263	0.0266	0.0291	0.0236	0.0208	0.0285	0.0254	0.0251		0.0563	0.0614	0.0617
32.2	0.0568167	0.0669854	0.0558479	0.0556167	0.0408021	0.0573187	0.0366042	0.0330896		32.2	0.0558	0.061	0.0624	0.05	0.0379	0.0425	0.0366	0.0331		0.0548	0.0593	0.0603	0.0492	0.0368	0.0428	0.0383	0.0325		0.054	0.0573	0.0591	0.0475	0.038	0.0452	0.0405	0.0325		0.0261	0.0265	0.029	0.0234	0.0207	0.0284	0.0252	0.025		0.0559	0.0608	0.0614
32.4	0.0572167	0.0683854	0.0568479	0.0601667	0.0400521	0.0526688	0.0375042	0.0342896		32.4	0.0555	0.0606	0.0616	0.0498	0.0373	0.0419	0.0364	0.0329		0.0544	0.0589	0.0599	0.0489	0.0365	0.0425	0.0381	0.0326		0.0535	0.057	0.0587	0.0471	0.0377	0.0449	0.0403	0.0324		0.026	0.0263	0.0288	0.0233	0.0206	0.0283	0.0251	0.0248		0.0555	0.0604	0.0609
32.6	0.0585667	0.0655354	0.0570479	0.0621167	0.0389021	0.0549188	0.0363542	0.0361896		32.6	0.0552	0.0605	0.0607	0.0495	0.0367	0.041	0.0362	0.0324		0.0541	0.0587	0.0595	0.0485	0.0361	0.0421	0.0378	0.0327		0.0532	0.0567	0.0582	0.0467	0.0374	0.0446	0.04	0.0322		0.0258	0.0262	0.0287	0.0232	0.0204	0.0281	0.025	0.0247		0.055	0.0601	0.0604
32.8	0.0552667	0.0624354	0.0547479	0.0612667	0.0364521	0.0598187	0.0398542	0.0315896		32.8	0.0551	0.0603	0.06	0.0488	0.0364	0.0401	0.036	0.0321		0.0539	0.0584	0.0592	0.0482	0.0359	0.0417	0.0376	0.0329		0.053	0.0566	0.0579	0.0464	0.0371	0.0443	0.0398	0.0321		0.0257	0.026	0.0286	0.023	0.0203	0.028	0.0248	0.0246		0.0548	0.06	0.0598
33	0.0580167	0.0685854	0.0534479	0.0561667	0.0387521	0.0608687	0.0373042	0.0327396		33	0.055	0.0602	0.0595	0.0482	0.0361	0.0394	0.0363	0.0324		0.0537	0.0583	0.0589	0.0478	0.0357	0.0413	0.0374	0.0329		0.0528	0.0564	0.0577	0.0461	0.0369	0.0441	0.0396	0.032		0.0255	0.0259	0.0284	0.0229	0.0202	0.0279	0.0247	0.0244		0.0546	0.0599	0.0595
33.2	0.0577667	0.0700854	0.0543979	0.0576667	0.0377021	0.0552688	0.0410542	0.0348896		33.2	0.0548	0.06	0.0594	0.048	0.0357	0.0391	0.037	0.0332		0.0536	0.0581	0.0587	0.0475	0.0355	0.041	0.0372	0.0327		0.0526	0.0563	0.0575	0.0458	0.0366	0.0439	0.0394	0.0318		0.0254	0.0257	0.0283	0.0227	0.02	0.0277	0.0246	0.0243		0.0545	0.0598	0.0593
33.4	0.0577167	0.0669854	0.0570479	0.0603667	0.0359521	0.0546188	0.0397542	0.0369896		33.4	0.0545	0.0598	0.0597	0.048	0.0352	0.0392	0.0378	0.0335		0.0534	0.0579	0.0585	0.0473	0.0353	0.0408	0.0371	0.0324		0.0524	0.056	0.0574	0.0456	0.0364	0.0437	0.0392	0.0316		0.0252	0.0256	0.0281	0.0226	0.0199	0.0276	0.0244	0.0242		0.0544	0.0596	0.0592
33.6	0.0571667	0.0649854	0.0587979	0.0578167	0.0356521	0.0526187	0.0387042	0.0341896		33.6	0.0542	0.0595	0.06	0.0479	0.035	0.0395	0.0382	0.0333		0.0532	0.0575	0.0584	0.0472	0.0352	0.0407	0.037	0.0321		0.0521	0.0556	0.0572	0.0454	0.0363	0.0436	0.039	0.0315		0.0251	0.0254	0.028	0.0225	0.0198	0.0274	0.0243	0.024		0.0543	0.0594	0.0592
33.8	0.0573167	0.0660354	0.0570479	0.0563667	0.0376021	0.0510187	0.0373542	0.0324396		33.8	0.054	0.0592	0.06	0.0476	0.0352	0.0398	0.0381	0.0331		0.0528	0.0571	0.0581	0.0471	0.0351	0.0407	0.037	0.0319		0.0516	0.0552	0.0569	0.0453	0.0361	0.0435	0.0388	0.0313		0.025	0.0253	0.0279	0.0223	0.0196	0.0273	0.0242	0.0239		0.054	0.0591	0.059
34	0.0546167	0.0653854	0.0541979	0.0603167	0.0393521	0.0465188	0.0401542	0.0356896		34	0.0538	0.0588	0.0595	0.0476	0.0358	0.0402	0.0378	0.0329		0.0524	0.0567	0.0579	0.047	0.035	0.0408	0.0369	0.0317		0.0512	0.0547	0.0566	0.0451	0.036	0.0433	0.0387	0.0312		0.0248	0.0252	0.0277	0.0222	0.0195	0.0272	0.024	0.0238		0.0538	0.0586	0.0587
34.2	0.0558667	0.0723854	0.0521979	0.0619667	0.0393521	0.0513687	0.0364542	0.0340896		34.2	0.0537	0.0584	0.0588	0.0477	0.0365	0.0403	0.0374	0.0324		0.052	0.0563	0.0575	0.0468	0.0349	0.0408	0.0369	0.0316		0.0507	0.0542	0.0562	0.0449	0.0358	0.0431	0.0386	0.031		0.0247	0.025	0.0276	0.0221	0.0194	0.027	0.0239	0.0236		0.0535	0.0581	0.0583
34.4	0.0581167	0.0708354	0.0542979	0.0577167	0.0372021	0.0496188	0.0372042	0.0303396		34.4	0.0535	0.058	0.0581	0.0476	0.0369	0.0402	0.0367	0.0317		0.0516	0.0558	0.0572	0.0466	0.0348	0.0407	0.0368	0.0315		0.0503	0.0539	0.0558	0.0446	0.0356	0.0429	0.0384	0.0309		0.0246	0.0249	0.0275	0.0219	0.0192	0.0269	0.0238	0.0235		0.0532	0.0577	0.0579
34.6	0.0549667	0.0662854	0.0550979	0.0546167	0.0363521	0.0571687	0.0372542	0.0302896		34.6	0.0532	0.0576	0.0576	0.0473	0.0367	0.0402	0.0362	0.0312		0.0513	0.0556	0.0568	0.0463	0.0347	0.0405	0.0367	0.0312		0.05	0.0537	0.0554	0.0443	0.0354	0.0426	0.0383	0.0308		0.0245	0.0248	0.0274	0.0218	0.0191	0.0268	0.0236	0.0234		0.0528	0.0573	0.0575
34.8	0.0587667	0.0677354	0.0606979	0.0538667	0.0366521	0.0539687	0.0373042	0.0276396		34.8	0.0528	0.0572	0.0574	0.047	0.036	0.0403	0.0356	0.0311		0.0511	0.0554	0.0565	0.046	0.0346	0.0403	0.0365	0.0309		0.0498	0.0535	0.0551	0.044	0.0351	0.0424	0.0381	0.0306		0.0244	0.0247	0.0273	0.0217	0.019	0.0267	0.0235	0.0233		0.0525	0.057	0.0572
35	0.0525667	0.0680354	0.0584479	0.0546667	0.0364021	0.0535687	0.0358042	0.0303396		35	0.0523	0.0569	0.0575	0.0467	0.0352	0.0402	0.0352	0.0313		0.051	0.0552	0.0562	0.0457	0.0344	0.0401	0.0363	0.0305		0.0497	0.0533	0.0549	0.0437	0.0349	0.0422	0.0379	0.0304		0.0243	0.0246	0.0272	0.0216	0.0189	0.0266	0.0234	0.0231		0.0521	0.0567	0.0571
35.2	0.0547667	0.0668354	0.0536979	0.0588167	0.0374521	0.0498688	0.0393542	0.0325896		35.2	0.0518	0.0567	0.0579	0.0463	0.0344	0.0397	0.0349	0.0315		0.0509	0.055	0.0561	0.0454	0.0341	0.0399	0.036	0.0303		0.0495	0.0531	0.0547	0.0434	0.0346	0.042	0.0376	0.0302		0.0242	0.0246	0.0271	0.0215	0.0188	0.0265	0.0233	0.023		0.0518	0.0566	0.0571
35.4	0.0564167	0.0687854	0.0534479	0.0579667	0.0340021	0.0552187	0.0355542	0.0352396		35.4	0.0515	0.0566	0.0579	0.0458	0.0339	0.0389	0.0348	0.0314		0.0508	0.0549	0.0559	0.0451	0.0338	0.0397	0.0358	0.0302		0.0494	0.0529	0.0545	0.0432	0.0344	0.0418	0.0374	0.03		0.0241	0.0245	0.027	0.0214	0.0187	0.0264	0.0232	0.0229		0.0516	0.0564	0.0569
35.6	0.0527167	0.0662354	0.0529979	0.0529167	0.0330521	0.0562188	0.0375542	0.0296396		35.6	0.0513	0.0565	0.0576	0.0454	0.0338	0.0381	0.0349	0.0312		0.0506	0.0548	0.0558	0.045	0.0335	0.0395	0.0355	0.0302		0.0491	0.0528	0.0543	0.043	0.0342	0.0417	0.0372	0.0297		0.024	0.0244	0.0269	0.0213	0.0186	0.0263	0.0231	0.0228		0.0514	0.0563	0.0567
35.8	0.0567167	0.0620854	0.0509479	0.0524167	0.0355521	0.0565688	0.0366042	0.0244396		35.8	0.0513	0.0565	0.057	0.0452	0.0339	0.0374	0.035	0.0315		0.0504	0.0547	0.0557	0.0448	0.0333	0.0393	0.0353	0.0303		0.0489	0.0526	0.0542	0.0428	0.034	0.0415	0.037	0.0295		0.024	0.0243	0.0268	0.0212	0.0185	0.0262	0.023	0.0227		0.0513	0.0562	0.0564
36	0.0542667	0.0617354	0.0542479	0.0513167	0.0378021	0.0554687	0.0364542	0.0254396		36	0.0513	0.0565	0.0564	0.0451	0.034	0.037	0.0348	0.032		0.0502	0.0547	0.0555	0.0447	0.0331	0.039	0.0351	0.0303		0.0487	0.0525	0.054	0.0426	0.0338	0.0413	0.0368	0.0293		0.0239	0.0242	0.0267	0.0211	0.0184	0.0261	0.0229	0.0226		0.0511	0.0561	0.0561
36.2	0.0558667	0.0643354	0.0569479	0.0534167	0.0358521	0.0504687	0.0375042	0.0283396		36.2	0.0514	0.0564	0.0558	0.045	0.0338	0.0369	0.0344	0.0319		0.0501	0.0547	0.0554	0.0446	0.033	0.0388	0.0349	0.0302		0.0485	0.0524	0.0539	0.0424	0.0337	0.0411	0.0367	0.0291		0.0238	0.0242	0.0267	0.021	0.0183	0.026	0.0228	0.0225		0.051	0.056	0.0558
36.4	0.0530667	0.0669854	0.0568979	0.0518667	0.0348521	0.0501187	0.0398542	0.0315896		36.4	0.0513	0.0562	0.0555	0.0449	0.0332	0.0373	0.0343	0.031		0.05	0.0546	0.0554	0.0445	0.0329	0.0385	0.0348	0.03		0.0483	0.0523	0.0537	0.0423	0.0335	0.041	0.0365	0.029		0.0237	0.0241	0.0266	0.0209	0.0182	0.0259	0.0227	0.0224		0.0509	0.0559	0.0556
36.6	0.0568667	0.0668854	0.0541479	0.0556667	0.0346521	0.0509187	0.0364042	0.0254396		36.6	0.051	0.056	0.0555	0.0449	0.0326	0.0378	0.0345	0.0302		0.0499	0.0544	0.0553	0.0444	0.0328	0.0384	0.0348	0.0297		0.0482	0.0522	0.0536	0.0421	0.0334	0.0408	0.0364	0.0288		0.0237	0.0241	0.0265	0.0209	0.0182	0.0259	0.0226	0.0223		0.0508	0.0557	0.0554
36.8	0.0539167	0.0713854	0.0521479	0.0587167	0.0380521	0.0509187	0.0338542	0.0275896		36.8	0.0507	0.0557	0.0558	0.0449	0.0321	0.0381	0.0347	0.0298		0.0497	0.0541	0.0552	0.0443	0.0327	0.0383	0.0347	0.0294		0.048	0.052	0.0535	0.042	0.0332	0.0407	0.0363	0.0287		0.0236	0.024	0.0265	0.0208	0.0181	0.0258	0.0226	0.0222		0.0506	0.0556	0.0553
37	0.0539167	0.0739354	0.0506479	0.0602167	0.0343521	0.0537688	0.0335042	0.0255396		37	0.0504	0.0555	0.056	0.0447	0.0321	0.038	0.0349	0.0297		0.0495	0.0538	0.055	0.0442	0.0326	0.0383	0.0347	0.0292		0.0478	0.0517	0.0534	0.0419	0.0331	0.0406	0.0361	0.0285		0.0236	0.024	0.0264	0.0207	0.018	0.0257	0.0225	0.0221		0.0505	0.0554	0.0551
37.2	0.0547167	0.0644854	0.0527979	0.0519167	0.0375521	0.0535687	0.0364542	0.0217396		37.2	0.0502	0.0553	0.0559	0.0445	0.0326	0.0376	0.0352	0.0295		0.0493	0.0536	0.0547	0.0441	0.0325	0.0383	0.0346	0.029		0.0476	0.0515	0.0532	0.0418	0.033	0.0405	0.036	0.0284		0.0235	0.0239	0.0264	0.0207	0.0179	0.0257	0.0224	0.022		0.0503	0.0553	0.0549
37.4	0.0527167	0.0634354	0.0536479	0.0511167	0.0378021	0.0498187	0.0351042	0.0234396		37.4	0.0501	0.0552	0.0556	0.0444	0.0335	0.0372	0.0352	0.0294		0.0491	0.0534	0.0545	0.0439	0.0324	0.0382	0.0345	0.0289		0.0474	0.0513	0.053	0.0416	0.0329	0.0404	0.0359	0.0282		0.0235	0.0239	0.0263	0.0206	0.0179	0.0256	0.0224	0.022		0.0501	0.0552	0.0548
37.6	0.0557167	0.0647854	0.0544979	0.0549167	0.0357521	0.0484187	0.0374542	0.0270396		37.6	0.0501	0.0552	0.0551	0.0443	0.0341	0.0368	0.0344	0.0293		0.0489	0.0533	0.0543	0.0437	0.0323	0.0382	0.0345	0.0287		0.0472	0.0512	0.0527	0.0414	0.0327	0.0402	0.0358	0.028		0.0234	0.0238	0.0263	0.0206	0.0178	0.0255	0.0223	0.0219		0.05	0.0551	0.0547
37.8	0.0509167	0.0640854	0.0552479	0.0497667	0.0358521	0.0496188	0.0373042	0.0269896		37.8	0.0502	0.0552	0.0548	0.0441	0.0341	0.0367	0.0333	0.0291		0.0488	0.0533	0.0541	0.0435	0.0321	0.038	0.0343	0.0284		0.0471	0.0512	0.0526	0.0412	0.0325	0.0401	0.0357	0.0278		0.0234	0.0238	0.0262	0.0205	0.0178	0.0255	0.0222	0.0218		0.0499	0.055	0.0547
38	0.0524667	0.0633854	0.0547479	0.0492167	0.0367021	0.0481687	0.0359042	0.0209396		38	0.0503	0.0552	0.0546	0.0438	0.0335	0.037	0.0325	0.0291		0.0488	0.0533	0.054	0.0432	0.0319	0.0379	0.0341	0.0281		0.047	0.0512	0.0525	0.041	0.0323	0.04	0.0355	0.0276		0.0233	0.0237	0.0262	0.0205	0.0177	0.0254	0.0222	0.0217		0.0499	0.055	0.0546
38.2	0.0527667	0.0640854	0.0518979	0.0546167	0.0353021	0.0529188	0.0346042	0.0254896		38.2	0.0503	0.0552	0.0547	0.0436	0.0326	0.0372	0.0323	0.029		0.0488	0.0533	0.054	0.043	0.0317	0.0377	0.0339	0.0278		0.047	0.0513	0.0524	0.0408	0.0321	0.0398	0.0354	0.0274		0.0233	0.0237	0.0261	0.0204	0.0177	0.0254	0.0221	0.0217		0.0499	0.055	0.0546
38.4	0.0523167	0.0633854	0.0513479	0.0557667	0.0336021	0.0586688	0.0350542	0.0232896		38.4	0.0501	0.0551	0.055	0.0435	0.0316	0.0372	0.0324	0.0284		0.0488	0.0533	0.054	0.0429	0.0316	0.0376	0.0337	0.0276		0.047	0.0512	0.0524	0.0407	0.0319	0.0397	0.0352	0.0273		0.0232	0.0236	0.0261	0.0204	0.0176	0.0253	0.0221	0.0216		0.0499	0.055	0.0546
38.6	0.0507667	0.0632854	0.0546979	0.0540167	0.0367021	0.0535187	0.0349042	0.0210896		38.6	0.0499	0.0551	0.0554	0.0434	0.0309	0.0369	0.0325	0.0274		0.0488	0.0532	0.054	0.0428	0.0314	0.0375	0.0335	0.0275		0.0469	0.051	0.0524	0.0405	0.0318	0.0396	0.035	0.0271		0.0232	0.0236	0.026	0.0203	0.0176	0.0253	0.022	0.0216		0.0499	0.055	0.0546
38.8	0.0536667	0.0597354	0.0541479	0.0506667	0.0377021	0.0522188	0.0353542	0.0226896		38.8	0.0497	0.0549	0.0556	0.0432	0.0308	0.0363	0.0326	0.0271		0.0487	0.0529	0.054	0.0428	0.0313	0.0374	0.0333	0.0275		0.0467	0.0507	0.0523	0.0405	0.0317	0.0395	0.0349	0.0269		0.0231	0.0235	0.026	0.0202	0.0175	0.0252	0.022	0.0215		0.0498	0.0548	0.0546
39	0.0515167	0.0601354	0.0533479	0.0522667	0.0410021	0.0472687	0.0370542	0.0237896		39	0.0495	0.0547	0.0554	0.0431	0.0314	0.0354	0.0329	0.0275		0.0484	0.0527	0.0538	0.0428	0.0313	0.0372	0.0332	0.0276		0.0463	0.0504	0.0522	0.0404	0.0316	0.0394	0.0348	0.0268		0.0231	0.0235	0.0259	0.0202	0.0175	0.0252	0.0219	0.0214		0.0496	0.0546	0.0545
39.2	0.0511667	0.0614854	0.0527479	0.0542667	0.0388021	0.0455187	0.0356542	0.0248396		39.2	0.0494	0.0545	0.0549	0.0432	0.032	0.0348	0.033	0.0282		0.0481	0.0524	0.0536	0.0428	0.0313	0.0371	0.0331	0.0276		0.046	0.0501	0.0519	0.0403	0.0316	0.0393	0.0347	0.0267		0.0231	0.0234	0.0259	0.0202	0.0174	0.0251	0.0219	0.0214		0.0494	0.0543	0.0544
39.4	0.0523667	0.0606354	0.0498979	0.0531667	0.0400521	0.0488188	0.0363042	0.0243396		39.4	0.0493	0.0542	0.0543	0.0433	0.0324	0.0346	0.0328	0.0288		0.0478	0.0521	0.0533	0.0428	0.0312	0.0369	0.0331	0.0275		0.0457	0.0498	0.0516	0.0402	0.0315	0.0392	0.0347	0.0266		0.023	0.0234	0.0258	0.0201	0.0174	0.0251	0.0218	0.0213		0.0492	0.054	0.0541
39.6	0.0496667	0.0642354	0.0498479	0.0522167	0.0399021	0.0496188	0.0335542	0.0263396		39.6	0.0492	0.054	0.0539	0.0432	0.0322	0.0348	0.0325	0.0289		0.0475	0.052	0.0531	0.0427	0.0311	0.0368	0.0331	0.0274		0.0454	0.0496	0.0513	0.0401	0.0314	0.039	0.0346	0.0265		0.023	0.0234	0.0258	0.0201	0.0173	0.025	0.0218	0.0213		0.0489	0.0538	0.0539
39.8	0.0513167	0.0607354	0.0511979	0.0508167	0.0341021	0.0511688	0.0362042	0.0209396		39.8	0.049	0.0539	0.0536	0.043	0.0316	0.0351	0.0324	0.0288		0.0474	0.0519	0.0528	0.0425	0.031	0.0366	0.033	0.0272		0.0453	0.0496	0.051	0.0399	0.0312	0.0389	0.0345	0.0264		0.023	0.0233	0.0258	0.02	0.0173	0.025	0.0217	0.0212		0.0487	0.0538	0.0536
40	0.0514667	0.0613354	0.0508479	0.0491667	0.0319521	0.0497187	0.0341042	0.0161896		40	0.0487	0.0538	0.0535	0.0429	0.0308	0.0355	0.0327	0.0286		0.0474	0.0519	0.0527	0.0422	0.0308	0.0365	0.0329	0.0271		0.0453	0.0496	0.0509	0.0397	0.031	0.0387	0.0344	0.0263		0.0229	0.0233	0.0257	0.02	0.0172	0.025	0.0217	0.0212		0.0486	0.0537	0.0534
40.2	0.0516167	0.0638854	0.0548979	0.0514667	0.0337021	0.0514687	0.0356542	0.0194396		40.2	0.0485	0.0537	0.0537	0.0427	0.0302	0.0358	0.033	0.0283		0.0474	0.0518	0.0526	0.042	0.0306	0.0364	0.0328	0.0271		0.0453	0.0497	0.0509	0.0394	0.0308	0.0386	0.0342	0.0261		0.0229	0.0232	0.0257	0.0199	0.0172	0.0249	0.0217	0.0211		0.0486	0.0537	0.0532
40.4	0.0500167	0.0619354	0.0530979	0.0472167	0.0349021	0.0506187	0.0347042	0.0230396		40.4	0.0483	0.0537	0.054	0.0423	0.0302	0.0357	0.033	0.0277		0.0474	0.0518	0.0526	0.0417	0.0304	0.0363	0.0327	0.027		0.0453	0.0497	0.0508	0.0392	0.0306	0.0385	0.034	0.026		0.0228	0.0232	0.0256	0.0199	0.0172	0.0249	0.0216	0.0211		0.0485	0.0537	0.0532
40.6	0.0525667	0.0586854	0.0500479	0.0491667	0.0356021	0.0492187	0.0338042	0.0228896		40.6	0.0483	0.0537	0.054	0.042	0.0307	0.0354	0.0329	0.0266		0.0474	0.0517	0.0525	0.0416	0.0303	0.0363	0.0325	0.0269		0.0453	0.0496	0.0508	0.0391	0.0305	0.0384	0.0339	0.0258		0.0227	0.0231	0.0256	0.0199	0.0171	0.0248	0.0216	0.0211		0.0485	0.0537	0.0532
40.8	0.0500667	0.0615854	0.0500979	0.0503667	0.0396521	0.0505188	0.0365542	0.0233396		40.8	0.0483	0.0536	0.0538	0.0418	0.0316	0.0351	0.0325	0.0258		0.0472	0.0516	0.0525	0.0415	0.0303	0.0363	0.0324	0.0268		0.0451	0.0494	0.0508	0.039	0.0304	0.0383	0.0337	0.0257		0.0227	0.023	0.0255	0.0198	0.0171	0.0248	0.0215	0.021		0.0484	0.0536	0.0532
41	0.0474667	0.0620354	0.0482479	0.0535667	0.0396021	0.0498187	0.0324542	0.0205396		41	0.0484	0.0536	0.0536	0.0418	0.0321	0.035	0.0316	0.0257		0.047	0.0515	0.0524	0.0414	0.0302	0.0362	0.0324	0.0265		0.0449	0.0492	0.0507	0.039	0.0303	0.0383	0.0336	0.0255		0.0226	0.0229	0.0254	0.0197	0.017	0.0247	0.0215	0.021		0.0483	0.0534	0.0532
41.2	0.0491667	0.0624854	0.0489479	0.0510167	0.0356021	0.0484687	0.0336042	0.0209396		41.2	0.0485	0.0535	0.0533	0.0418	0.032	0.035	0.0307	0.0259		0.0468	0.0514	0.0523	0.0414	0.0302	0.0362	0.0323	0.0263		0.0446	0.049	0.0506	0.0389	0.0303	0.0382	0.0336	0.0254		0.0225	0.0228	0.0254	0.0197	0.0169	0.0247	0.0214	0.0209		0.0482	0.0533	0.0531
41.4	0.0495667	0.0601854	0.0536479	0.0478167	0.0333021	0.0486188	0.0346042	0.0224896		41.4	0.0485	0.0534	0.0531	0.0418	0.0315	0.0351	0.0302	0.0263		0.0467	0.0512	0.0522	0.0413	0.0302	0.0361	0.0322	0.0261		0.0443	0.0487	0.0504	0.0389	0.0302	0.0381	0.0335	0.0253		0.0224	0.0228	0.0253	0.0196	0.0169	0.0246	0.0213	0.0209		0.0482	0.0531	0.053
41.6	0.0491167	0.0574354	0.0567979	0.0475667	0.0323021	0.0492187	0.0352042	0.0230396		41.6	0.0484	0.0531	0.0531	0.0418	0.0307	0.0352	0.0301	0.0265		0.0466	0.0509	0.0521	0.0413	0.0301	0.036	0.0322	0.026		0.0441	0.0484	0.0502	0.0387	0.0301	0.038	0.0335	0.0253		0.0223	0.0227	0.0252	0.0195	0.0168	0.0245	0.0213	0.0208		0.0481	0.0529	0.0529
41.8	0.0508167	0.0609854	0.0536979	0.0461167	0.0309021	0.0466188	0.0322042	0.0225396		41.8	0.0481	0.0528	0.0532	0.0418	0.03	0.0351	0.0305	0.0264		0.0464	0.0505	0.0519	0.0412	0.03	0.0359	0.0321	0.0259		0.0438	0.048	0.0499	0.0386	0.03	0.0378	0.0334	0.0252		0.0223	0.0226	0.0251	0.0195	0.0168	0.0245	0.0212	0.0207		0.0479	0.0526	0.0528
42	0.0461167	0.0654854	0.0499979	0.0503667	0.0329521	0.0464687	0.0340042	0.0239896		42	0.0477	0.0524	0.0533	0.0417	0.0296	0.0346	0.0308	0.0259		0.0461	0.05	0.0516	0.0411	0.0299	0.0358	0.032	0.0259		0.0435	0.0475	0.0496	0.0384	0.0298	0.0377	0.0333	0.0252		0.0222	0.0226	0.0251	0.0194	0.0167	0.0244	0.0212	0.0207		0.0477	0.0522	0.0526
42.2	0.0492167	0.0600354	0.0473479	0.0510667	0.0327521	0.0484187	0.0316042	0.0216896		42.2	0.0473	0.0519	0.0532	0.0415	0.0296	0.0339	0.031	0.0255		0.0457	0.0495	0.0513	0.041	0.0298	0.0357	0.0319	0.026		0.0431	0.047	0.0493	0.0383	0.0297	0.0375	0.0332	0.0251		0.0222	0.0226	0.025	0.0194	0.0166	0.0243	0.0211	0.0206		0.0474	0.0519	0.0524
42.4	0.0502167	0.0588854	0.0480479	0.0492667	0.0364521	0.0469688	0.0338042	0.0184396		42.4	0.047	0.0515	0.0529	0.0413	0.03	0.0333	0.0313	0.0255		0.0453	0.049	0.0509	0.0408	0.0297	0.0355	0.0317	0.0259		0.0427	0.0466	0.0489	0.038	0.0296	0.0374	0.0331	0.025		0.0222	0.0225	0.025	0.0193	0.0166	0.0243	0.0211	0.0206		0.0471	0.0514	0.0521
42.6	0.0497667	0.0568354	0.0492479	0.0487167	0.0358521	0.0485687	0.0339542	0.0228896		42.6	0.0467	0.0513	0.0523	0.0412	0.0303	0.0327	0.0314	0.0255		0.0449	0.0489	0.0505	0.0406	0.0296	0.0353	0.0317	0.0258		0.0424	0.0464	0.0485	0.0378	0.0294	0.0372	0.0329	0.0248		0.0221	0.0225	0.025	0.0193	0.0165	0.0243	0.021	0.0205		0.0467	0.0512	0.0518
42.8	0.0511167	0.0616854	0.0538479	0.0515667	0.0358021	0.0486188	0.0339042	0.0219396		42.8	0.0465	0.0514	0.0517	0.0411	0.0304	0.0326	0.0314	0.0252		0.0446	0.049	0.0501	0.0403	0.0294	0.0351	0.0316	0.0257		0.0422	0.0465	0.0481	0.0375	0.0292	0.037	0.0328	0.0247		0.0221	0.0225	0.0249	0.0192	0.0165	0.0242	0.021	0.0205		0.0464	0.0512	0.0515
43	0.0486667	0.0611854	0.0545979	0.0479667	0.0331521	0.0484687	0.0351542	0.0202396		43	0.0466	0.0514	0.0512	0.0409	0.0301	0.0329	0.0313	0.0252		0.0447	0.0493	0.0499	0.04	0.0292	0.0349	0.0315	0.0255		0.0423	0.0468	0.0479	0.0372	0.029	0.0368	0.0326	0.0246		0.022	0.0224	0.0249	0.0192	0.0165	0.0242	0.0209	0.0204		0.0464	0.0513	0.0512
43.2	0.0487167	0.0564354	0.0529479	0.0451167	0.0282021	0.0486188	0.0323542	0.0176396		43.2	0.0467	0.0516	0.0511	0.0405	0.0296	0.0335	0.0312	0.0256		0.0448	0.0496	0.0499	0.0397	0.0289	0.0347	0.0313	0.0254		0.0425	0.0472	0.048	0.0369	0.0287	0.0366	0.0324	0.0244		0.022	0.0224	0.0249	0.0191	0.0164	0.0241	0.0209	0.0204		0.0465	0.0514	0.0511
43.4	0.0486667	0.0545354	0.0502979	0.0466667	0.0297021	0.0494187	0.0319042	0.0219396		43.4	0.0468	0.0519	0.0512	0.0404	0.029	0.034	0.0312	0.0259		0.0451	0.0499	0.0501	0.0394	0.0287	0.0346	0.0311	0.0253		0.0427	0.0475	0.0481	0.0367	0.0285	0.0364	0.0322	0.0243		0.0219	0.0223	0.0248	0.0191	0.0164	0.0241	0.0208	0.0203		0.0466	0.0517	0.0511
43.6	0.0471667	0.0606354	0.0493979	0.0506167	0.0282021	0.0519187	0.0305542	0.0158396		43.6	0.0468	0.052	0.0516	0.0402	0.0287	0.0345	0.0312	0.0259		0.0453	0.0499	0.0503	0.0392	0.0285	0.0345	0.0309	0.0253		0.0429	0.0475	0.0484	0.0366	0.0283	0.0364	0.032	0.0241		0.0219	0.0222	0.0247	0.019	0.0163	0.024	0.0208	0.0203		0.0468	0.0518	0.0512
43.8	0.0487167	0.0608354	0.0486979	0.0517667	0.0323521	0.0511688	0.0320042	0.0142396		43.8	0.0469	0.0519	0.0521	0.0401	0.0288	0.0345	0.0307	0.0256		0.0453	0.0497	0.0505	0.0392	0.0284	0.0346	0.0307	0.0252		0.0428	0.0473	0.0486	0.0367	0.0283	0.0364	0.0318	0.024		0.0218	0.0222	0.0247	0.019	0.0163	0.024	0.0207	0.0202		0.0469	0.0518	0.0514
44	0.0474667	0.0632854	0.0486479	0.0509167	0.0320521	0.0516687	0.0323542	0.0149396		44	0.0468	0.0517	0.0525	0.0401	0.0293	0.0343	0.0301	0.025		0.0451	0.0495	0.0505	0.0394	0.0284	0.0347	0.0306	0.0251		0.0426	0.0471	0.0487	0.0367	0.0283	0.0364	0.0317	0.0239		0.0217	0.0221	0.0246	0.0189	0.0162	0.0239	0.0207	0.0202		0.0469	0.0517	0.0515
44.2	0.0462667	0.0571354	0.0513979	0.0485167	0.0323521	0.0442188	0.0332042	0.0208396		44.2	0.0467	0.0515	0.0524	0.0402	0.0298	0.0339	0.0295	0.0244		0.0449	0.0493	0.0504	0.0395	0.0285	0.0347	0.0307	0.0249		0.0423	0.0468	0.0485	0.0368	0.0284	0.0365	0.0317	0.0238		0.0217	0.022	0.0245	0.0189	0.0162	0.0239	0.0206	0.0201		0.0467	0.0515	0.0516
44.4	0.0489167	0.0582854	0.0550479	0.0455167	0.0322521	0.0480187	0.0342042	0.0194396		44.4	0.0465	0.0514	0.0521	0.0405	0.0301	0.0336	0.0293	0.024		0.0446	0.0491	0.0502	0.0397	0.0287	0.0347	0.0307	0.0247		0.042	0.0465	0.0483	0.0369	0.0284	0.0364	0.0318	0.0238		0.0216	0.0219	0.0245	0.0188	0.0161	0.0238	0.0206	0.0201		0.0465	0.0513	0.0515
44.6	0.0473167	0.0603354	0.0536979	0.0480167	0.0297021	0.0477187	0.0313042	0.0218896		44.6	0.0464	0.0511	0.0518	0.0407	0.03	0.0334	0.0292	0.0242		0.0444	0.0488	0.0501	0.0397	0.0288	0.0345	0.0309	0.0246		0.0417	0.0461	0.0481	0.0368	0.0285	0.0363	0.0318	0.0237		0.0215	0.0218	0.0244	0.0187	0.016	0.0237	0.0205	0.02		0.0462	0.051	0.0514
44.8	0.0470667	0.0546854	0.0506979	0.0452667	0.0293021	0.0472187	0.0302542	0.0223396		44.8	0.0463	0.0508	0.0515	0.0406	0.0297	0.0332	0.0293	0.0246		0.0442	0.0485	0.0499	0.0397	0.0288	0.0344	0.031	0.0245		0.0416	0.0458	0.0478	0.0367	0.0284	0.0361	0.0318	0.0237		0.0214	0.0217	0.0243	0.0187	0.016	0.0237	0.0204	0.02		0.046	0.0506	0.0512
45	0.0442667	0.0542854	0.0481979	0.0458167	0.0318021	0.0516188	0.0330042	0.0185896		45	0.0461	0.0505	0.0512	0.0404	0.0292	0.0331	0.0294	0.0248		0.0441	0.0482	0.0496	0.0395	0.0287	0.0342	0.031	0.0245		0.0414	0.0455	0.0475	0.0366	0.0282	0.036	0.0318	0.0237		0.0213	0.0216	0.0242	0.0186	0.0159	0.0236	0.0204	0.0199		0.0458	0.0502	0.051
45.2	0.0480167	0.0544854	0.0464479	0.0513667	0.0287521	0.0550687	0.0305042	0.0159396		45.2	0.0458	0.05	0.0509	0.0403	0.0289	0.0329	0.0298	0.0251		0.0439	0.0477	0.0494	0.0394	0.0285	0.0342	0.0308	0.0245		0.0411	0.0452	0.0473	0.0365	0.028	0.0359	0.0317	0.0236		0.0212	0.0215	0.0241	0.0185	0.0158	0.0235	0.0203	0.0198		0.0456	0.0499	0.0507
45.4	0.0466167	0.0588854	0.0435979	0.0476167	0.0315521	0.0476188	0.0309542	0.0149396		45.4	0.0455	0.0496	0.0508	0.04	0.0286	0.0327	0.0302	0.0253		0.0436	0.0472	0.0491	0.0391	0.0284	0.0342	0.0307	0.0245		0.0408	0.0448	0.047	0.0362	0.0279	0.0358	0.0316	0.0235		0.0211	0.0214	0.024	0.0184	0.0158	0.0234	0.0202	0.0198		0.0454	0.0495	0.0504
45.6	0.0469167	0.0564354	0.0459979	0.0446667	0.0308521	0.0453188	0.0321542	0.0156896		45.6	0.0451	0.0492	0.0507	0.0397	0.0284	0.0324	0.0302	0.0254		0.0432	0.0469	0.0487	0.0389	0.0282	0.0341	0.0304	0.0244		0.0405	0.0445	0.0467	0.0359	0.0277	0.0357	0.0314	0.0233		0.021	0.0213	0.0239	0.0183	0.0157	0.0233	0.0202	0.0197		0.0452	0.0492	0.0501
45.8	0.0459667	0.0557854	0.0481479	0.0468167	0.0312021	0.0472187	0.0306042	0.0188896		45.8	0.0448	0.049	0.0505	0.0393	0.0284	0.032	0.0301	0.0252		0.0429	0.0467	0.0484	0.0386	0.028	0.034	0.0303	0.0242		0.0402	0.0442	0.0464	0.0357	0.0275	0.0355	0.0312	0.0232		0.0209	0.0212	0.0238	0.0183	0.0156	0.0233	0.0201	0.0196		0.0449	0.0489	0.0498
46	0.0469667	0.0532354	0.0488979	0.0426667	0.0293521	0.0440688	0.0288542	0.0206396		46	0.0446	0.0488	0.0501	0.0391	0.0284	0.0318	0.03	0.0249		0.0426	0.0465	0.0481	0.0382	0.0277	0.0337	0.0301	0.024		0.0399	0.0439	0.0461	0.0354	0.0273	0.0353	0.0311	0.023		0.0208	0.0211	0.0238	0.0182	0.0155	0.0232	0.02	0.0196		0.0447	0.0487	0.0495
46.2	0.0454167	0.0582854	0.0491979	0.0458667	0.0312021	0.0437688	0.0324042	0.0207396		46.2	0.0445	0.0486	0.0496	0.0389	0.0284	0.0317	0.0298	0.0245		0.0423	0.0464	0.0478	0.038	0.0275	0.0335	0.0299	0.0238		0.0397	0.0437	0.0458	0.0352	0.0271	0.0351	0.0309	0.0229		0.0207	0.021	0.0237	0.0181	0.0154	0.0231	0.0199	0.0195		0.0445	0.0485	0.0493
46.4	0.0457667	0.0601354	0.0470479	0.0495167	0.0311521	0.0453687	0.0311042	0.0195896		46.4	0.0444	0.0484	0.0492	0.0388	0.0283	0.0318	0.0295	0.0244		0.0422	0.0462	0.0476	0.0377	0.0274	0.0332	0.0297	0.0237		0.0394	0.0435	0.0455	0.0349	0.0269	0.0349	0.0307	0.0227		0.0206	0.021	0.0236	0.018	0.0154	0.023	0.0198	0.0194		0.0443	0.0482	0.0491
46.6	0.0445167	0.0635854	0.0462479	0.0517667	0.0315521	0.0498688	0.0314042	0.0152396		46.6	0.0442	0.0482	0.0489	0.0386	0.0281	0.032	0.0293	0.0244		0.042	0.046	0.0474	0.0375	0.0272	0.033	0.0296	0.0237		0.0392	0.0434	0.0453	0.0347	0.0267	0.0347	0.0305	0.0225		0.0206	0.0209	0.0235	0.0179	0.0153	0.0229	0.0198	0.0193		0.0441	0.048	0.0489
46.8	0.0447667	0.0577854	0.0492979	0.0481667	0.0323521	0.0498688	0.0301042	0.0202896		46.8	0.0441	0.048	0.0487	0.0385	0.0278	0.0325	0.0293	0.0244		0.0419	0.0459	0.0473	0.0373	0.027	0.0329	0.0294	0.0236		0.0389	0.0432	0.0451	0.0345	0.0265	0.0346	0.0303	0.0224		0.0205	0.0208	0.0234	0.0178	0.0152	0.0229	0.0197	0.0193		0.0439	0.0479	0.0487
47	0.0454167	0.0538854	0.0500479	0.0451667	0.0326021	0.0425188	0.0302542	0.0167896		47	0.0439	0.0479	0.0487	0.0385	0.0274	0.0329	0.0292	0.0242		0.0417	0.0457	0.0471	0.0372	0.0269	0.0329	0.0293	0.0236		0.0387	0.0431	0.0449	0.0343	0.0264	0.0344	0.0302	0.0223		0.0204	0.0208	0.0234	0.0178	0.0151	0.0228	0.0196	0.0192		0.0437	0.0477	0.0485
47.2	0.0453667	0.0543854	0.0521979	0.0430167	0.0313521	0.0472187	0.0292542	0.0183896		47.2	0.0437	0.0478	0.0489	0.0384	0.0273	0.0331	0.029	0.0237		0.0416	0.0456	0.047	0.0371	0.0267	0.0329	0.0292	0.0235		0.0386	0.043	0.0447	0.0341	0.0262	0.0342	0.03	0.0222		0.0204	0.0207	0.0233	0.0177	0.0151	0.0227	0.0195	0.0191		0.0436	0.0476	0.0484
47.4	0.0446167	0.0580354	0.0483979	0.0433667	0.0291521	0.0466688	0.0312042	0.0172896		47.4	0.0434	0.0477	0.0491	0.0383	0.0272	0.033	0.0286	0.0235		0.0415	0.0455	0.0469	0.037	0.0266	0.0329	0.0291	0.0234		0.0385	0.0428	0.0446	0.034	0.0261	0.0341	0.0298	0.0221		0.0203	0.0206	0.0232	0.0176	0.015	0.0226	0.0195	0.019		0.0434	0.0476	0.0483
47.6	0.0471667	0.0541354	0.0495979	0.0429167	0.0277021	0.0428688	0.0286542	0.0190396		47.6	0.0432	0.0477	0.0491	0.0382	0.0273	0.0327	0.0281	0.0234		0.0413	0.0454	0.0467	0.0369	0.0265	0.0328	0.0291	0.0232		0.0384	0.0427	0.0444	0.0338	0.026	0.0339	0.0297	0.0221		0.0202	0.0206	0.0232	0.0176	0.0149	0.0226	0.0194	0.019		0.0432	0.0475	0.0482
47.8	0.0441667	0.0531854	0.0500979	0.0461667	0.0298021	0.0451187	0.0299542	0.0162896		47.8	0.043	0.0476	0.049	0.0382	0.0274	0.0322	0.028	0.0231		0.0412	0.0453	0.0467	0.0368	0.0266	0.0326	0.0291	0.0231		0.0383	0.0426	0.0443	0.0337	0.0259	0.0338	0.0297	0.0221		0.0202	0.0205	0.0231	0.0175	0.0149	0.0225	0.0193	0.0189		0.043	0.0475	0.0482
48	0.0420667	0.0557854	0.0460979	0.0499167	0.0307521	0.0452688	0.0325042	0.0141896		48	0.0429	0.0476	0.0487	0.0382	0.0274	0.0317	0.0281	0.0229		0.041	0.0453	0.0466	0.0368	0.0266	0.0324	0.0291	0.0229		0.0383	0.0426	0.0442	0.0337	0.0259	0.0337	0.0296	0.022		0.0201	0.0204	0.0231	0.0174	0.0148	0.0224	0.0193	0.0188		0.0429	0.0475	0.0481
48.2	0.0442167	0.0531854	0.0495979	0.0557667	0.0311021	0.0454188	0.0299542	0.0140896		48.2	0.0429	0.0475	0.0484	0.0381	0.0275	0.0313	0.0282	0.0232		0.0409	0.0452	0.0465	0.0367	0.0266	0.0323	0.0291	0.0229		0.0382	0.0426	0.0442	0.0337	0.0258	0.0336	0.0296	0.0219		0.02	0.0204	0.023	0.0174	0.0147	0.0224	0.0192	0.0188		0.0428	0.0474	0.0481
48.4	0.0448667	0.0542354	0.0490479	0.0502667	0.0312021	0.0424188	0.0294542	0.0126396		48.4	0.043	0.0474	0.0481	0.038	0.0274	0.0311	0.0282	0.0236		0.0408	0.0452	0.0464	0.0366	0.0266	0.0322	0.0291	0.0228		0.0381	0.0425	0.0441	0.0336	0.0258	0.0336	0.0295	0.0218		0.02	0.0203	0.0229	0.0173	0.0147	0.0223	0.0191	0.0187		0.0427	0.0473	0.048
48.6	0.0439667	0.0573354	0.0494479	0.0431167	0.0293021	0.0422187	0.0279542	0.0168396		48.6	0.043	0.0473	0.0479	0.0378	0.0271	0.031	0.0282	0.0238		0.0408	0.0451	0.0464	0.0365	0.0265	0.0322	0.029	0.0228		0.038	0.0424	0.0441	0.0335	0.0257	0.0335	0.0294	0.0217		0.0199	0.0202	0.0229	0.0173	0.0146	0.0223	0.0191	0.0186		0.0427	0.0471	0.0478
48.8	0.0428167	0.0577854	0.0508479	0.0435167	0.0313521	0.0459188	0.0317042	0.0173396		48.8	0.0429	0.0472	0.0478	0.0377	0.0268	0.0311	0.0284	0.0239		0.0408	0.0449	0.0463	0.0364	0.0263	0.0322	0.0289	0.0228		0.0379	0.0423	0.0441	0.0334	0.0255	0.0335	0.0293	0.0216		0.0198	0.0202	0.0228	0.0172	0.0146	0.0222	0.019	0.0186		0.0427	0.047	0.0477
49	0.0457167	0.0561354	0.0506979	0.0438167	0.0310521	0.0464187	0.0285042	0.0205396		49	0.0428	0.047	0.0479	0.0376	0.0264	0.0312	0.0286	0.0239		0.0407	0.0448	0.0462	0.0362	0.0261	0.0322	0.0287	0.0227		0.0377	0.0421	0.044	0.0333	0.0253	0.0335	0.0292	0.0215		0.0198	0.0201	0.0227	0.0171	0.0145	0.0221	0.019	0.0185		0.0427	0.0468	0.0475
49.2	0.0452667	0.0569854	0.0489479	0.0462167	0.0298021	0.0444688	0.0294542	0.0165896		49.2	0.0426	0.0469	0.048	0.0374	0.0262	0.0312	0.0285	0.0238		0.0405	0.0446	0.046	0.0361	0.026	0.0321	0.0286	0.0226		0.0376	0.042	0.0438	0.0331	0.0252	0.0334	0.0291	0.0214		0.0197	0.02	0.0227	0.0171	0.0144	0.0221	0.0189	0.0184		0.0426	0.0467	0.0473
49.4	0.0437167	0.0568354	0.0482979	0.0432167	0.0313521	0.0453687	0.0301042	0.0157396		49.4	0.0424	0.0466	0.048	0.0373	0.0261	0.0312	0.0285	0.0237		0.0404	0.0444	0.0459	0.036	0.0259	0.032	0.0284	0.0224		0.0375	0.0418	0.0437	0.033	0.0251	0.0332	0.029	0.0213		0.0196	0.02	0.0226	0.017	0.0144	0.022	0.0188	0.0184		0.0425	0.0465	0.0472
49.6	0.0438667	0.0568854	0.0462479	0.0446167	0.0307021	0.0459687	0.0293542	0.0193396		49.6	0.0423	0.0464	0.0478	0.0373	0.0262	0.0311	0.0285	0.0237		0.0403	0.0442	0.0457	0.0359	0.0259	0.0318	0.0283	0.0222		0.0373	0.0416	0.0435	0.0329	0.0251	0.0331	0.0289	0.0212		0.0196	0.0199	0.0225	0.0169	0.0143	0.0219	0.0188	0.0183		0.0424	0.0463	0.0471
49.8	0.0445667	0.0611354	0.0433979	0.0498667	0.0274021	0.0472187	0.0279042	0.0169396		49.8	0.0422	0.0462	0.0475	0.0372	0.0264	0.0309	0.0284	0.0238		0.0401	0.044	0.0456	0.0358	0.0259	0.0316	0.0283	0.0221		0.0371	0.0414	0.0433	0.0328	0.025	0.033	0.0289	0.0211		0.0195	0.0198	0.0225	0.0169	0.0143	0.0219	0.0187	0.0182		0.0422	0.0461	0.047
50	0.0442667	0.0567354	0.0422479	0.0444667	0.0291521	0.0434688	0.0280042	0.0190896		50	0.0421	0.0461	0.0472	0.0371	0.0266	0.0308	0.0282	0.0239		0.0399	0.0438	0.0454	0.0357	0.0258	0.0314	0.0282	0.022		0.0369	0.0411	0.0432	0.0327	0.0249	0.0328	0.0288	0.0209		0.0195	0.0198	0.0224	0.0168	0.0142	0.0218	0.0186	0.0182		0.042	0.0459	0.0469
50.2	0.0440167	0.0557854	0.0445479	0.0430667	0.0295521	0.0438687	0.0320042	0.0161396		50.2	0.042	0.0458	0.047	0.0369	0.0267	0.0309	0.0279	0.0235		0.0397	0.0436	0.0452	0.0356	0.0257	0.0313	0.0281	0.022		0.0367	0.0409	0.043	0.0326	0.0248	0.0328	0.0287	0.0208		0.0194	0.0197	0.0224	0.0168	0.0141	0.0218	0.0186	0.0181		0.0418	0.0457	0.0468
50.4	0.0428167	0.0531854	0.0452479	0.0430167	0.0289021	0.0441687	0.0309542	0.0145396		50.4	0.0419	0.0456	0.0468	0.0368	0.0266	0.0311	0.0276	0.0229		0.0395	0.0434	0.0451	0.0355	0.0256	0.0313	0.028	0.022		0.0365	0.0407	0.0428	0.0325	0.0247	0.0327	0.0286	0.0207		0.0194	0.0197	0.0223	0.0167	0.0141	0.0217	0.0185	0.0181		0.0416	0.0455	0.0466
50.6	0.0437167	0.0544354	0.0463479	0.0474167	0.0275521	0.0472687	0.0279042	0.0185396		50.6	0.0416	0.0454	0.0467	0.0367	0.0263	0.0314	0.0273	0.0221		0.0393	0.0432	0.0449	0.0354	0.0254	0.0313	0.0279	0.0219		0.0363	0.0405	0.0426	0.0323	0.0245	0.0326	0.0285	0.0206		0.0193	0.0196	0.0223	0.0167	0.014	0.0217	0.0185	0.018		0.0414	0.0452	0.0465
50.8	0.0436167	0.0581854	0.0468479	0.0499167	0.0298521	0.0457188	0.0311542	0.0170396		50.8	0.0414	0.0452	0.0467	0.0366	0.0259	0.0316	0.0272	0.0215		0.0391	0.0431	0.0447	0.0353	0.0252	0.0313	0.0278	0.0218		0.0361	0.0404	0.0423	0.0322	0.0244	0.0324	0.0283	0.0205		0.0193	0.0196	0.0222	0.0166	0.014	0.0216	0.0184	0.0179		0.0413	0.0451	0.0463
51	0.0427667	0.0584354	0.0440979	0.0450167	0.0305021	0.0466188	0.0305542	0.0175896		51	0.0412	0.0452	0.0467	0.0365	0.0256	0.0314	0.027	0.0212		0.039	0.0431	0.0445	0.0351	0.025	0.0312	0.0277	0.0216		0.036	0.0404	0.0422	0.032	0.0242	0.0323	0.0282	0.0204		0.0192	0.0195	0.0222	0.0165	0.0139	0.0216	0.0184	0.0179		0.0411	0.0451	0.0461
51.2	0.0423667	0.0593854	0.0435979	0.0469667	0.0294021	0.0467687	0.0301042	0.0134896		51.2	0.0411	0.0452	0.0467	0.0363	0.0254	0.031	0.0267	0.0211		0.039	0.0431	0.0444	0.0349	0.0249	0.0311	0.0276	0.0213		0.036	0.0405	0.0421	0.0318	0.0241	0.0321	0.0281	0.0203		0.0191	0.0195	0.0221	0.0165	0.0139	0.0215	0.0183	0.0178		0.0411	0.045	0.046
51.4	0.0433667	0.0566854	0.0405479	0.0450667	0.0320021	0.0445688	0.0272042	0.0165396		51.4	0.041	0.0452	0.0466	0.0361	0.0253	0.0304	0.0267	0.0213		0.039	0.0432	0.0443	0.0347	0.0248	0.0309	0.0275	0.0211		0.036	0.0405	0.042	0.0316	0.024	0.032	0.0279	0.0202		0.0191	0.0194	0.022	0.0164	0.0138	0.0214	0.0183	0.0178		0.041	0.0451	0.0458
51.6	0.0409667	0.0569854	0.0405479	0.0427667	0.0337021	0.0409187	0.0304542	0.0156396		51.6	0.0411	0.0453	0.0464	0.0359	0.0254	0.0298	0.0268	0.0217		0.039	0.0432	0.0443	0.0345	0.0247	0.0307	0.0274	0.021		0.036	0.0405	0.042	0.0315	0.0238	0.0319	0.0278	0.0201		0.019	0.0193	0.022	0.0164	0.0138	0.0214	0.0182	0.0177		0.041	0.0451	0.0458
51.8	0.0440167	0.0569854	0.0443479	0.0433167	0.0318021	0.0427187	0.0281542	0.0142396		51.8	0.0411	0.0452	0.0462	0.0357	0.0255	0.0294	0.0269	0.0222		0.039	0.0431	0.0444	0.0344	0.0247	0.0306	0.0273	0.021		0.036	0.0403	0.042	0.0314	0.0237	0.0318	0.0277	0.02		0.0189	0.0192	0.0219	0.0163	0.0137	0.0213	0.0182	0.0177		0.041	0.045	0.0458
52	0.0426167	0.0546354	0.0461479	0.0421167	0.0321021	0.0424687	0.0269042	0.0167896		52	0.0411	0.045	0.046	0.0357	0.0256	0.0292	0.0268	0.0225		0.0389	0.0428	0.0444	0.0344	0.0246	0.0305	0.0272	0.021		0.0359	0.0401	0.042	0.0314	0.0237	0.0318	0.0276	0.0199		0.0189	0.0191	0.0218	0.0163	0.0137	0.0213	0.0181	0.0176		0.0409	0.0448	0.0458
52.2	0.0420167	0.0532354	0.0450979	0.0444167	0.0310021	0.0410187	0.0296042	0.0150396		52.2	0.0411	0.0448	0.0459	0.0357	0.0256	0.0293	0.0266	0.0225		0.0387	0.0426	0.0443	0.0344	0.0247	0.0305	0.0272	0.021		0.0356	0.0398	0.0419	0.0314	0.0236	0.0318	0.0275	0.0198		0.0188	0.0191	0.0218	0.0162	0.0136	0.0212	0.018	0.0176		0.0408	0.0446	0.0457
52.4	0.0430167	0.0563354	0.0432479	0.0458667	0.0286521	0.0402187	0.0322042	0.0148396		52.4	0.0409	0.0445	0.0459	0.0359	0.0254	0.0295	0.0266	0.0223		0.0384	0.0423	0.0441	0.0344	0.0247	0.0305	0.0272	0.021		0.0354	0.0395	0.0417	0.0313	0.0236	0.0318	0.0275	0.0197		0.0187	0.019	0.0217	0.0161	0.0135	0.0211	0.018	0.0175		0.0406	0.0444	0.0456
52.6	0.0405667	0.0566354	0.0430479	0.0418167	0.0270521	0.0415188	0.0294042	0.0136396		52.6	0.0406	0.0442	0.0458	0.036	0.0251	0.0298	0.0268	0.0219		0.0382	0.0419	0.0439	0.0344	0.0247	0.0305	0.0271	0.0209		0.0351	0.0392	0.0414	0.0313	0.0236	0.0317	0.0275	0.0197		0.0186	0.0189	0.0216	0.0161	0.0135	0.0211	0.0179	0.0174		0.0404	0.0441	0.0454
52.8	0.0408667	0.0580354	0.0422979	0.0422667	0.0289521	0.0417187	0.0291542	0.0165896		52.8	0.0402	0.0439	0.0458	0.0359	0.0248	0.03	0.0271	0.0216		0.0379	0.0417	0.0437	0.0344	0.0246	0.0305	0.0271	0.0208		0.0348	0.0389	0.0411	0.0311	0.0235	0.0315	0.0274	0.0196		0.0186	0.0188	0.0215	0.016	0.0134	0.021	0.0178	0.0174		0.0401	0.0438	0.0452
53	0.0430167	0.0594354	0.0422979	0.0421667	0.0280521	0.0439687	0.0290542	0.0162896		53	0.0399	0.0436	0.0456	0.0357	0.0246	0.0301	0.0272	0.0217		0.0377	0.0415	0.0434	0.0342	0.0245	0.0303	0.0271	0.0207		0.0345	0.0386	0.0409	0.031	0.0234	0.0314	0.0274	0.0196		0.0185	0.0188	0.0215	0.0159	0.0134	0.0209	0.0178	0.0173		0.0399	0.0436	0.045
53.2	0.0423667	0.0609354	0.0435479	0.0433167	0.0294521	0.0429688	0.0298042	0.0161396		53.2	0.0396	0.0434	0.0454	0.0354	0.0245	0.0299	0.0273	0.0219		0.0375	0.0412	0.0431	0.034	0.0243	0.0302	0.027	0.0206		0.0343	0.0384	0.0407	0.0308	0.0232	0.0312	0.0273	0.0196		0.0184	0.0187	0.0214	0.0159	0.0133	0.0209	0.0177	0.0173		0.0397	0.0433	0.0448
53.4	0.0418167	0.0566354	0.0437979	0.0410167	0.0294021	0.0433188	0.0306542	0.0148896		53.4	0.0395	0.0432	0.045	0.0352	0.0246	0.0296	0.0272	0.0221		0.0373	0.041	0.0429	0.0338	0.0242	0.03	0.0268	0.0206		0.0341	0.0381	0.0404	0.0306	0.0231	0.0311	0.0272	0.0195		0.0184	0.0187	0.0214	0.0158	0.0132	0.0208	0.0177	0.0172		0.0395	0.0431	0.0445
53.6	0.0412667	0.0527354	0.0444479	0.0388167	0.0279521	0.0461188	0.0262042	0.0113396		53.6	0.0393	0.0429	0.0447	0.0349	0.0248	0.0294	0.0269	0.022		0.0371	0.0407	0.0427	0.0336	0.024	0.0299	0.0267	0.0206		0.034	0.0379	0.0402	0.0305	0.0229	0.031	0.027	0.0194		0.0183	0.0186	0.0213	0.0157	0.0132	0.0207	0.0176	0.0171		0.0393	0.0428	0.0443
53.8	0.0410667	0.0553354	0.0448479	0.0414167	0.0278021	0.0445688	0.0285542	0.0122896		53.8	0.0392	0.0428	0.0443	0.0346	0.025	0.0293	0.0265	0.0217		0.0369	0.0405	0.0425	0.0334	0.0239	0.0298	0.0266	0.0205		0.0338	0.0378	0.04	0.0303	0.0228	0.0309	0.0269	0.0193		0.0183	0.0186	0.0213	0.0157	0.0131	0.0207	0.0175	0.0171		0.0392	0.0427	0.0441
54	0.0412667	0.0542854	0.0441979	0.0451667	0.0277521	0.0415688	0.0270042	0.0118396		54	0.0392	0.0427	0.0441	0.0344	0.025	0.0295	0.026	0.0212		0.0367	0.0405	0.0423	0.0332	0.0238	0.0297	0.0265	0.0205		0.0336	0.0378	0.0398	0.0301	0.0226	0.0307	0.0268	0.0192		0.0182	0.0186	0.0212	0.0156	0.0131	0.0206	0.0175	0.017		0.039	0.0426	0.0439
54.2	0.0429167	0.0545354	0.0423479	0.0443167	0.0285021	0.0422687	0.0253542	0.0121896		54.2	0.0391	0.0427	0.044	0.0343	0.0247	0.0298	0.0256	0.0206		0.0366	0.0405	0.0421	0.033	0.0236	0.0296	0.0264	0.0204		0.0335	0.0379	0.0396	0.0299	0.0225	0.0306	0.0266	0.0191		0.0182	0.0185	0.0212	0.0156	0.013	0.0206	0.0174	0.017		0.0389	0.0426	0.0438
54.4	0.0388667	0.0544354	0.0405479	0.0442167	0.0276021	0.0430687	0.0257542	0.0168896		54.4	0.039	0.0428	0.044	0.0343	0.0242	0.0299	0.0255	0.0202		0.0366	0.0406	0.042	0.0328	0.0235	0.0295	0.0263	0.0203		0.0335	0.038	0.0396	0.0297	0.0224	0.0304	0.0265	0.019		0.0182	0.0185	0.0212	0.0155	0.013	0.0205	0.0174	0.0169		0.0389	0.0426	0.0437
54.6	0.0417667	0.0492354	0.0413979	0.0418167	0.0286021	0.0447188	0.0287042	0.0152396		54.6	0.0389	0.0428	0.0442	0.0343	0.0238	0.0299	0.0254	0.0201		0.0365	0.0407	0.042	0.0327	0.0233	0.0294	0.0262	0.0201		0.0335	0.0381	0.0396	0.0295	0.0222	0.0303	0.0264	0.0189		0.0182	0.0185	0.0211	0.0155	0.0129	0.0205	0.0173	0.0169		0.0388	0.0427	0.0437
54.8	0.0409667	0.0496854	0.0432979	0.0372167	0.0288021	0.0426687	0.0272042	0.0174896		54.8	0.0389	0.0429	0.0443	0.0343	0.0236	0.0296	0.0253	0.0202		0.0366	0.0408	0.042	0.0325	0.0232	0.0293	0.0261	0.02		0.0336	0.0381	0.0396	0.0294	0.0221	0.0302	0.0262	0.0188		0.0181	0.0184	0.0211	0.0155	0.0129	0.0205	0.0173	0.0168		0.0388	0.0428	0.0437
55	0.0416167	0.0557854	0.0455479	0.0400667	0.0309021	0.0413188	0.0291542	0.0124896		55	0.0388	0.0429	0.0444	0.0342	0.0235	0.0291	0.0251	0.0205		0.0366	0.0408	0.0421	0.0325	0.0231	0.0292	0.026	0.0199		0.0336	0.0381	0.0396	0.0294	0.022	0.0302	0.0261	0.0187		0.0181	0.0184	0.021	0.0154	0.0129	0.0204	0.0173	0.0168		0.0388	0.0427	0.0437
55.2	0.0411167	0.0581354	0.0426479	0.0405167	0.0306521	0.0430188	0.0290042	0.0104396		55.2	0.0388	0.0429	0.0444	0.0341	0.0236	0.0286	0.0252	0.0207		0.0366	0.0408	0.0421	0.0325	0.0231	0.0292	0.0259	0.0198		0.0336	0.0381	0.0397	0.0294	0.022	0.0301	0.026	0.0186		0.018	0.0184	0.021	0.0154	0.0128	0.0204	0.0172	0.0167		0.0388	0.0427	0.0437
55.4	0.0407167	0.0550354	0.0432479	0.0411667	0.0307021	0.0415688	0.0266042	0.0114396		55.4	0.0388	0.0429	0.0443	0.0341	0.0238	0.0282	0.0254	0.0209		0.0366	0.0408	0.0421	0.0325	0.0231	0.0292	0.0258	0.0198		0.0336	0.038	0.0397	0.0294	0.0219	0.0301	0.0259	0.0185		0.018	0.0183	0.021	0.0154	0.0128	0.0204	0.0172	0.0167		0.0388	0.0427	0.0437
55.6	0.0395667	0.0538354	0.0427479	0.0437667	0.0325021	0.0424687	0.0268542	0.0145896		55.6	0.0389	0.0428	0.0441	0.0341	0.0239	0.028	0.0255	0.0208		0.0366	0.0407	0.0421	0.0325	0.0231	0.0292	0.0258	0.0198		0.0335	0.038	0.0396	0.0294	0.0219	0.0301	0.0259	0.0185		0.018	0.0183	0.0209	0.0153	0.0128	0.0203	0.0171	0.0166		0.0388	0.0427	0.0436
55.8	0.0387667	0.0544354	0.0420979	0.0443167	0.0317521	0.0483188	0.0261542	0.0122396		55.8	0.0389	0.0427	0.0439	0.034	0.0239	0.028	0.0256	0.0207		0.0365	0.0406	0.0421	0.0325	0.0231	0.0291	0.0257	0.0197		0.0334	0.0378	0.0396	0.0294	0.0219	0.0301	0.0259	0.0184		0.0179	0.0182	0.0209	0.0153	0.0127	0.0203	0.0171	0.0166		0.0388	0.0426	0.0436
56	0.0397167	0.0535354	0.0391979	0.0425167	0.0297521	0.0442188	0.0272042	0.00968958		56	0.039	0.0426	0.0438	0.034	0.0238	0.0281	0.0257	0.0207		0.0365	0.0405	0.0421	0.0325	0.0231	0.029	0.0258	0.0197		0.0333	0.0377	0.0396	0.0293	0.0218	0.03	0.0259	0.0184		0.0179	0.0182	0.0208	0.0152	0.0127	0.0202	0.0171	0.0165		0.0387	0.0424	0.0436
56.2	0.0407167	0.0506854	0.0406979	0.0421667	0.0281021	0.0435187	0.0273542	0.00968958		56.2	0.0388	0.0424	0.0438	0.0341	0.0236	0.0284	0.0259	0.0206		0.0363	0.0404	0.042	0.0325	0.0231	0.029	0.0257	0.0196		0.0332	0.0376	0.0395	0.0293	0.0218	0.0299	0.0258	0.0184		0.0178	0.0181	0.0208	0.0152	0.0126	0.0202	0.017	0.0165		0.0385	0.0422	0.0435
56.4	0.0395667	0.0550854	0.0424979	0.0396667	0.0270521	0.0430687	0.0291042	0.0103396		56.4	0.0386	0.0423	0.0438	0.0341	0.0234	0.0288	0.0261	0.0206		0.0362	0.0402	0.0419	0.0324	0.023	0.0289	0.0257	0.0195		0.0331	0.0374	0.0394	0.0292	0.0217	0.0299	0.0258	0.0184		0.0178	0.018	0.0207	0.0152	0.0126	0.0201	0.017	0.0165		0.0384	0.0421	0.0434
56.6	0.0401667	0.0557854	0.0447979	0.0393667	0.0238521	0.0409687	0.0238542	0.00943958		56.6	0.0384	0.042	0.0438	0.0341	0.0233	0.029	0.0262	0.0208		0.0361	0.04	0.0418	0.0324	0.023	0.0288	0.0257	0.0195		0.033	0.0372	0.0392	0.0292	0.0217	0.0298	0.0258	0.0183		0.0177	0.018	0.0207	0.0151	0.0126	0.0201	0.0169	0.0164		0.0383	0.042	0.0433
56.8	0.0386667	0.0522854	0.0452979	0.0419667	0.0245021	0.0405688	0.0257042	0.00958958		56.8	0.0382	0.0418	0.0438	0.0339	0.0233	0.0289	0.0261	0.0209		0.0359	0.0398	0.0416	0.0323	0.023	0.0287	0.0257	0.0195		0.0328	0.037	0.0391	0.0291	0.0216	0.0298	0.0257	0.0183		0.0176	0.0179	0.0206	0.0151	0.0125	0.0201	0.0169	0.0164		0.0382	0.0417	0.0431
57	0.0401667	0.0543854	0.0437479	0.0391167	0.0252521	0.0414187	0.0246542	0.00773958		57	0.038	0.0416	0.0436	0.0336	0.0234	0.0286	0.0257	0.0209		0.0357	0.0396	0.0415	0.0322	0.023	0.0287	0.0256	0.0194		0.0326	0.0368	0.0389	0.029	0.0216	0.0297	0.0257	0.0182		0.0176	0.0179	0.0206	0.015	0.0125	0.02	0.0168	0.0163		0.038	0.0415	0.043
57.2	0.0395667	0.0512854	0.0435979	0.0419667	0.0287021	0.0368187	0.0249542	0.00683958		57.2	0.0379	0.0414	0.0433	0.0334	0.0236	0.0283	0.0253	0.0206		0.0356	0.0394	0.0413	0.0321	0.0229	0.0286	0.0256	0.0194		0.0324	0.0366	0.0388	0.0289	0.0215	0.0296	0.0256	0.0181		0.0175	0.0178	0.0205	0.015	0.0124	0.0199	0.0168	0.0163		0.0378	0.0413	0.0428
57.4	0.0402667	0.0519354	0.0421979	0.0412167	0.0277521	0.0406187	0.0260042	0.0133396		57.4	0.0378	0.0412	0.043	0.0331	0.0237	0.0281	0.0248	0.0202		0.0354	0.0392	0.0411	0.032	0.0227	0.0285	0.0255	0.0193		0.0322	0.0364	0.0386	0.0288	0.0214	0.0295	0.0256	0.018		0.0175	0.0177	0.0205	0.0149	0.0124	0.0199	0.0167	0.0162		0.0377	0.0411	0.0427
57.6	0.0407667	0.0526354	0.0418479	0.0399667	0.0297521	0.0389188	0.0260042	0.0152396		57.6	0.0377	0.041	0.0428	0.0329	0.0236	0.0281	0.0243	0.0199		0.0352	0.039	0.0409	0.0318	0.0226	0.0285	0.0253	0.0192		0.032	0.0362	0.0384	0.0287	0.0213	0.0294	0.0255	0.0179		0.0174	0.0177	0.0204	0.0149	0.0123	0.0198	0.0167	0.0162		0.0376	0.0409	0.0425
57.8	0.0408667	0.0554854	0.0412479	0.0395167	0.0284521	0.0421687	0.0276542	0.0137396		57.8	0.0376	0.0409	0.0426	0.0328	0.0233	0.0282	0.024	0.0196		0.035	0.0388	0.0407	0.0316	0.0224	0.0284	0.0252	0.0192		0.0318	0.036	0.0382	0.0285	0.0212	0.0294	0.0253	0.0178		0.0174	0.0176	0.0204	0.0148	0.0123	0.0198	0.0166	0.0161		0.0374	0.0407	0.0423
58	0.0399667	0.0536354	0.0427479	0.0409167	0.0279021	0.0432688	0.0284042	0.0102396		58	0.0375	0.0407	0.0424	0.0328	0.0229	0.0283	0.024	0.0194		0.0348	0.0387	0.0405	0.0315	0.0223	0.0283	0.025	0.019		0.0317	0.0359	0.038	0.0284	0.021	0.0292	0.0252	0.0178		0.0173	0.0176	0.0203	0.0148	0.0122	0.0197	0.0166	0.0161		0.0373	0.0406	0.0422
58.2	0.0395167	0.0546854	0.0445979	0.0419667	0.0289021	0.0435687	0.0288542	0.00773958		58.2	0.0373	0.0406	0.0424	0.0329	0.0226	0.0284	0.0241	0.0191		0.0347	0.0386	0.0403	0.0313	0.0221	0.0282	0.0249	0.0189		0.0316	0.0358	0.0378	0.0282	0.0209	0.0291	0.0251	0.0177		0.0173	0.0175	0.0203	0.0147	0.0122	0.0197	0.0166	0.016		0.0371	0.0405	0.042
58.4	0.0368167	0.0527354	0.0456979	0.0409167	0.0312521	0.0426687	0.0259042	0.00368958		58.4	0.0372	0.0405	0.0424	0.0329	0.0224	0.0283	0.0242	0.0189		0.0346	0.0385	0.0402	0.0311	0.022	0.0281	0.0248	0.0188		0.0315	0.0357	0.0377	0.028	0.0207	0.0289	0.025	0.0176		0.0172	0.0175	0.0202	0.0147	0.0121	0.0197	0.0165	0.016		0.037	0.0403	0.0419
58.6	0.0380167	0.0485854	0.0421479	0.0415667	0.0301021	0.0416688	0.0282542	0.00368958		58.6	0.037	0.0404	0.0424	0.0328	0.0223	0.028	0.0241	0.0188		0.0345	0.0384	0.0401	0.031	0.0219	0.028	0.0247	0.0187		0.0314	0.0356	0.0375	0.0278	0.0206	0.0288	0.0249	0.0175		0.0172	0.0175	0.0202	0.0146	0.0121	0.0196	0.0165	0.016		0.0369	0.0403	0.0418
58.8	0.0403667	0.0506854	0.0412479	0.0429667	0.0299021	0.0397187	0.0243542	0.0100896		58.8	0.0369	0.0403	0.0424	0.0327	0.0223	0.0275	0.0241	0.019		0.0345	0.0383	0.04	0.0309	0.0218	0.0279	0.0247	0.0187		0.0313	0.0356	0.0374	0.0277	0.0205	0.0287	0.0247	0.0174		0.0172	0.0174	0.0201	0.0146	0.0121	0.0196	0.0164	0.0159		0.0368	0.0402	0.0418
59	0.0390167	0.0485854	0.0400479	0.0412667	0.0264521	0.0409687	0.0237542	0.0127896		59	0.0368	0.0403	0.0423	0.0325	0.0224	0.0271	0.0241	0.0192		0.0344	0.0383	0.0399	0.0308	0.0218	0.0278	0.0246	0.0186		0.0312	0.0355	0.0374	0.0276	0.0204	0.0286	0.0246	0.0173		0.0171	0.0174	0.0201	0.0145	0.012	0.0195	0.0164	0.0159		0.0367	0.0401	0.0417
59.2	0.0354667	0.0496354	0.0402979	0.0382167	0.0267521	0.0361187	0.0269542	0.0165396		59.2	0.0367	0.0402	0.0421	0.0324	0.0225	0.0268	0.0243	0.0194		0.0343	0.0383	0.0399	0.0307	0.0217	0.0277	0.0245	0.0186		0.0311	0.0354	0.0373	0.0276	0.0204	0.0286	0.0246	0.0173		0.0171	0.0174	0.0201	0.0145	0.012	0.0195	0.0163	0.0158		0.0366	0.04	0.0416
59.4	0.0371167	0.0516354	0.0388979	0.0395667	0.0270521	0.0343688	0.0266042	0.0183396		59.4	0.0366	0.0402	0.0419	0.0323	0.0225	0.0266	0.0244	0.0196		0.0343	0.0382	0.0398	0.0307	0.0217	0.0277	0.0245	0.0185		0.0311	0.0354	0.0372	0.0275	0.0203	0.0285	0.0245	0.0172		0.017	0.0173	0.02	0.0145	0.0119	0.0194	0.0163	0.0158		0.0365	0.04	0.0415
59.6	0.0373667	0.0495854	0.0407979	0.0404667	0.0251521	0.0365188	0.0259542	0.0155896		59.6	0.0366	0.0402	0.0417	0.0322	0.0224	0.0267	0.0244	0.0198		0.0342	0.0382	0.0398	0.0306	0.0216	0.0277	0.0244	0.0184		0.031	0.0354	0.0372	0.0274	0.0202	0.0284	0.0244	0.0172		0.017	0.0173	0.02	0.0144	0.0119	0.0194	0.0163	0.0157		0.0364	0.04	0.0414
59.8	0.0385667	0.0506354	0.0422979	0.0356667	0.0250021	0.0384188	0.0274542	0.0118396		59.8	0.0366	0.0401	0.0416	0.0321	0.0223	0.0269	0.0244	0.0199		0.0341	0.0381	0.0398	0.0306	0.0216	0.0276	0.0244	0.0184		0.0309	0.0353	0.0371	0.0274	0.0201	0.0284	0.0243	0.0172		0.017	0.0172	0.02	0.0144	0.0119	0.0194	0.0162	0.0157		0.0364	0.04	0.0413
60	0.0361667	0.0491854	0.0415479	0.0376667	0.0264521	0.0390687	0.0280542	0.0124396		60	0.0365	0.0401	0.0415	0.032	0.0221	0.0272	0.0244	0.0199		0.0341	0.0381	0.0397	0.0305	0.0216	0.0275	0.0244	0.0183		0.0309	0.0353	0.0371	0.0273	0.0201	0.0283	0.0243	0.0171		0.0169	0.0172	0.0199	0.0143	0.0118	0.0193	0.0162	0.0157		0.0363	0.0399	0.0413
[truncated: 21 more columns]

## Sheet: 2B_Staggered_RMSE(BB_0.1)_PPMCC
t	S3	S4	S5	S6	S7	S8	S9	S10		time	HEC_P3	HEC_P4	HEC_P5	HEC_P6	HEC_P7	HEC_P8	HEC_P9	HEC_P10		Erroe_3	Erroe_4	Erroe_5	Erroe_6	Erroe_7	Erroe_8	Erroe_9	Erroe_10		Error^2_3	Error^2_4	Error^2_5	Error^2_6	Error^2_7	Error^2_8	Error^2_9	Error^2_10		RMSE_3	RMSE_4	RMSE_5	RMSE_6	RMSE_7	RMSE_8	RMSE_9	RMSE_10
0	-3.33333e-05	3.54167e-05	-0.000102083	-3.33333e-05	0.000152083	-0.00013125	-4.58333e-05	-1.04167e-05		0	0	0	0	0	0	0	0	0		-3.33333e-05	3.54167e-05	-0.000102083	-3.33333e-05	0.000152083	-0.00013125	-4.58333e-05	-1.04167e-05		1.11111e-09	1.25434e-09	1.0421e-08	1.11111e-09	2.31293e-08	1.72266e-08	2.10069e-09	1.08507e-10		0.802525	1.0736	0.923912	0.852534	0.386773	1.45641	0.256523	0.621565
0.2	0.000116667	0.000385417	-0.000102083	-8.33333e-05	0.000302083	-8.125e-05	5.41667e-05	-0.000160417		0.2	0	0	0	0	0	0	0	0		0.000116667	0.000385417	-0.000102083	-8.33333e-05	0.000302083	-8.125e-05	5.41667e-05	-0.000160417		1.36111e-08	1.48546e-07	1.0421e-08	6.94444e-09	9.12543e-08	6.60156e-09	2.93403e-09	2.57335e-08
0.4	1.66667e-05	-0.000114583	-2.08333e-06	-3.33333e-05	5.20833e-05	-0.00013125	0.000204167	-1.04167e-05		0.4	0	0	0	0	0	0	0	0		1.66667e-05	-0.000114583	-2.08333e-06	-3.33333e-05	5.20833e-05	-0.00013125	0.000204167	-1.04167e-05		2.77778e-10	1.31293e-08	4.34028e-12	1.11111e-09	2.71267e-09	1.72266e-08	4.1684e-08	1.08507e-10	PPMCC	0.94693	0.930037	0.962145	0.981921	0.96959	0.986927	0.98909	0.936086
0.6	-8.33333e-05	-1.45833e-05	4.79167e-05	1.66667e-05	-4.79167e-05	1.875e-05	-0.000195833	-1.04167e-05		0.6	0	0	0	0	0	0	0	0		-8.33333e-05	-1.45833e-05	4.79167e-05	1.66667e-05	-4.79167e-05	1.875e-05	-0.000195833	-1.04167e-05		6.94444e-09	2.12674e-10	2.29601e-09	2.77778e-10	2.29601e-09	3.51562e-10	3.83507e-08	1.08507e-10
0.8	-3.33333e-05	0.000135417	-2.08333e-06	6.66667e-05	-0.000147917	-0.00013125	-9.58333e-05	0.000189583		0.8	0	0	0	0	0	0	0	0		-3.33333e-05	0.000135417	-2.08333e-06	6.66667e-05	-0.000147917	-0.00013125	-9.58333e-05	0.000189583		1.11111e-09	1.83377e-08	4.34028e-12	4.44444e-09	2.18793e-08	1.72266e-08	9.18403e-09	3.59418e-08
1	-8.33333e-05	8.54167e-05	4.79167e-05	6.66667e-05	-0.000147917	6.875e-05	4.16667e-06	-1.04167e-05		1	0	0	0	0	0	0	0	0		-8.33333e-05	8.54167e-05	4.79167e-05	6.66667e-05	-0.000147917	6.875e-05	4.16667e-06	-1.04167e-05		6.94444e-09	7.29601e-09	2.29601e-09	4.44444e-09	2.18793e-08	4.72656e-09	1.73611e-11	1.08507e-10
1.2	6.66667e-05	-0.000114583	4.79167e-05	0.000266667	-0.000147917	1.875e-05	-4.58333e-05	-0.000110417		1.2	0	0	0	0	0	0	0	0		6.66667e-05	-0.000114583	4.79167e-05	0.000266667	-0.000147917	1.875e-05	-4.58333e-05	-0.000110417		4.44444e-09	1.31293e-08	2.29601e-09	7.11111e-08	2.18793e-08	3.51562e-10	2.10069e-09	1.21918e-08
1.4	1.66667e-05	3.54167e-05	4.79167e-05	-8.33333e-05	-0.000147917	6.875e-05	5.41667e-05	0.000139583		1.4	0	0	0	0	0	0	0	0		1.66667e-05	3.54167e-05	4.79167e-05	-8.33333e-05	-0.000147917	6.875e-05	5.41667e-05	0.000139583		2.77778e-10	1.25434e-09	2.29601e-09	6.94444e-09	2.18793e-08	4.72656e-09	2.93403e-09	1.94835e-08
1.6	0.000316667	3.54167e-05	4.79167e-05	-8.33333e-05	-9.79167e-05	6.875e-05	0.000104167	3.95833e-05		1.6	0	0	0	0	0	0	0	0		0.000316667	3.54167e-05	4.79167e-05	-8.33333e-05	-9.79167e-05	6.875e-05	0.000104167	3.95833e-05		1.00278e-07	1.25434e-09	2.29601e-09	6.94444e-09	9.58767e-09	4.72656e-09	1.08507e-08	1.56684e-09
1.8	1.66667e-05	-0.000164583	4.79167e-05	-8.33333e-05	-9.79167e-05	0.00021875	0.000104167	-0.000160417		1.8	0	0	0	0	0	0	0	0		1.66667e-05	-0.000164583	4.79167e-05	-8.33333e-05	-9.79167e-05	0.00021875	0.000104167	-0.000160417		2.77778e-10	2.70877e-08	2.29601e-09	6.94444e-09	9.58767e-09	4.78516e-08	1.08507e-08	2.57335e-08
2	-0.000133333	-6.45833e-05	4.79167e-05	-3.33333e-05	2.08333e-06	1.875e-05	-0.000145833	-1.04167e-05		2	0	0	0	0	0	0	0	0		-0.000133333	-6.45833e-05	4.79167e-05	-3.33333e-05	2.08333e-06	1.875e-05	-0.000145833	-1.04167e-05		1.77778e-08	4.17101e-09	2.29601e-09	1.11111e-09	4.34028e-12	3.51562e-10	2.12674e-08	1.08507e-10
2.2	1.66667e-05	-1.45833e-05	-2.08333e-06	1.66667e-05	-4.79167e-05	6.875e-05	-4.58333e-05	-6.04167e-05		2.2	0	0	0	0	0	0	0	0		1.66667e-05	-1.45833e-05	-2.08333e-06	1.66667e-05	-4.79167e-05	6.875e-05	-4.58333e-05	-6.04167e-05		2.77778e-10	2.12674e-10	4.34028e-12	2.77778e-10	2.29601e-09	4.72656e-09	2.10069e-09	3.65017e-09
2.4	-8.33333e-05	0.000135417	4.79167e-05	-3.33333e-05	5.20833e-05	6.875e-05	5.41667e-05	0.000139583		2.4	0	0	0	0	0	0	0	0		-8.33333e-05	0.000135417	4.79167e-05	-3.33333e-05	5.20833e-05	6.875e-05	5.41667e-05	0.000139583		6.94444e-09	1.83377e-08	2.29601e-09	1.11111e-09	2.71267e-09	4.72656e-09	2.93403e-09	1.94835e-08
2.6	0.000116667	-0.000114583	-5.20833e-05	1.66667e-05	-9.79167e-05	-0.00013125	-4.58333e-05	-6.04167e-05		2.6	0	0	0	0	0	0	0	0		0.000116667	-0.000114583	-5.20833e-05	1.66667e-05	-9.79167e-05	-0.00013125	-4.58333e-05	-6.04167e-05		1.36111e-08	1.31293e-08	2.71267e-09	2.77778e-10	9.58767e-09	1.72266e-08	2.10069e-09	3.65017e-09
2.8	6.66667e-05	-6.45833e-05	-2.08333e-06	6.66667e-05	5.20833e-05	-8.125e-05	5.41667e-05	-0.000110417		2.8	0	0	0	0	0	0	0	0		6.66667e-05	-6.45833e-05	-2.08333e-06	6.66667e-05	5.20833e-05	-8.125e-05	5.41667e-05	-0.000110417		4.44444e-09	4.17101e-09	4.34028e-12	4.44444e-09	2.71267e-09	6.60156e-09	2.93403e-09	1.21918e-08
3	-0.000133333	-1.45833e-05	4.79167e-05	0.000116667	5.20833e-05	-0.00013125	0.000104167	0.000139583		3	0	0	0	0	0	0	0	0		-0.000133333	-1.45833e-05	4.79167e-05	0.000116667	5.20833e-05	-0.00013125	0.000104167	0.000139583		1.77778e-08	2.12674e-10	2.29601e-09	1.36111e-08	2.71267e-09	1.72266e-08	1.08507e-08	1.94835e-08
3.2	-3.33333e-05	8.54167e-05	-5.20833e-05	0.000116667	5.20833e-05	6.875e-05	-0.000195833	3.95833e-05		3.2	0	0	0	0	0	0	0	0		-3.33333e-05	8.54167e-05	-5.20833e-05	0.000116667	5.20833e-05	6.875e-05	-0.000195833	3.95833e-05		1.11111e-09	7.29601e-09	2.71267e-09	1.36111e-08	2.71267e-09	4.72656e-09	3.83507e-08	1.56684e-09
3.4	-0.000133333	-0.000164583	-2.08333e-06	-0.000133333	2.08333e-06	-0.00013125	-9.58333e-05	-0.000160417		3.4	0	0	0	0	0	0	0	0		-0.000133333	-0.000164583	-2.08333e-06	-0.000133333	2.08333e-06	-0.00013125	-9.58333e-05	-0.000160417		1.77778e-08	2.70877e-08	4.34028e-12	1.77778e-08	4.34028e-12	1.72266e-08	9.18403e-09	2.57335e-08
3.6	1.66667e-05	-6.45833e-05	4.79167e-05	-8.33333e-05	2.08333e-06	1.875e-05	-4.58333e-05	3.95833e-05		3.6	0	0	0	0	0	0	0	0		1.66667e-05	-6.45833e-05	4.79167e-05	-8.33333e-05	2.08333e-06	1.875e-05	-4.58333e-05	3.95833e-05		2.77778e-10	4.17101e-09	2.29601e-09	6.94444e-09	4.34028e-12	3.51562e-10	2.10069e-09	1.56684e-09
3.8	1.66667e-05	-1.45833e-05	-2.08333e-06	-3.33333e-05	2.08333e-06	-3.125e-05	-4.58333e-05	-1.04167e-05		3.8	0	0	0	0	0	0	0	0		1.66667e-05	-1.45833e-05	-2.08333e-06	-3.33333e-05	2.08333e-06	-3.125e-05	-4.58333e-05	-1.04167e-05		2.77778e-10	2.12674e-10	4.34028e-12	1.11111e-09	4.34028e-12	9.76563e-10	2.10069e-09	1.08507e-10
4	6.66667e-05	0.000135417	4.79167e-05	-3.33333e-05	5.20833e-05	0.00011875	5.41667e-05	0.000189583		4	0	0	0	0	0	0	0	0		6.66667e-05	0.000135417	4.79167e-05	-3.33333e-05	5.20833e-05	0.00011875	5.41667e-05	0.000189583		4.44444e-09	1.83377e-08	2.29601e-09	1.11111e-09	2.71267e-09	1.41016e-08	2.93403e-09	3.59418e-08
4.2	-3.33333e-05	-0.000114583	-5.20833e-05	1.66667e-05	5.20833e-05	-3.125e-05	0.000104167	-1.04167e-05		4.2	0	0	0	0	0	0	0	0		-3.33333e-05	-0.000114583	-5.20833e-05	1.66667e-05	5.20833e-05	-3.125e-05	0.000104167	-1.04167e-05		1.11111e-09	1.31293e-08	2.71267e-09	2.77778e-10	2.71267e-09	9.76563e-10	1.08507e-08	1.08507e-10
4.4	-0.000133333	-1.45833e-05	-0.000152083	-3.33333e-05	5.20833e-05	0.00016875	0.000204167	-0.000110417		4.4	0	0	0	0	0	0	0	0		-0.000133333	-1.45833e-05	-0.000152083	-3.33333e-05	5.20833e-05	0.00016875	0.000204167	-0.000110417		1.77778e-08	2.12674e-10	2.31293e-08	1.11111e-09	2.71267e-09	2.84766e-08	4.1684e-08	1.21918e-08
4.6	6.66667e-05	-1.45833e-05	-2.08333e-06	1.66667e-05	0.000102083	1.875e-05	-9.58333e-05	8.95833e-05		4.6	0	0	0	0	0	0	0	0		6.66667e-05	-1.45833e-05	-2.08333e-06	1.66667e-05	0.000102083	1.875e-05	-9.58333e-05	8.95833e-05		4.44444e-09	2.12674e-10	4.34028e-12	2.77778e-10	1.0421e-08	3.51562e-10	9.18403e-09	8.02517e-09
4.8	-3.33333e-05	0.000135417	-2.08333e-06	6.66667e-05	0.000102083	0.00021875	-9.58333e-05	3.95833e-05		4.8	0	0	0	0	0	0	0	0		-3.33333e-05	0.000135417	-2.08333e-06	6.66667e-05	0.000102083	0.00021875	-9.58333e-05	3.95833e-05		1.11111e-09	1.83377e-08	4.34028e-12	4.44444e-09	1.0421e-08	4.78516e-08	9.18403e-09	1.56684e-09
5	0.000166667	-0.000164583	-5.20833e-05	0.000166667	0.000302083	6.875e-05	4.16667e-06	-0.000160417		5	0	0	0	0	0	0	0	0		0.000166667	-0.000164583	-5.20833e-05	0.000166667	0.000302083	6.875e-05	4.16667e-06	-0.000160417		2.77778e-08	2.70877e-08	2.71267e-09	2.77778e-08	9.12543e-08	4.72656e-09	1.73611e-11	2.57335e-08
5.2	1.66667e-05	-1.45833e-05	-0.000102083	-8.33333e-05	0.000102083	-3.125e-05	4.16667e-06	-1.04167e-05		5.2	0	0	0	0	0	0	0	0		1.66667e-05	-1.45833e-05	-0.000102083	-8.33333e-05	0.000102083	-3.125e-05	4.16667e-06	-1.04167e-05		2.77778e-10	2.12674e-10	1.0421e-08	6.94444e-09	1.0421e-08	9.76563e-10	1.73611e-11	1.08507e-10
5.4	-0.000183333	-1.45833e-05	-2.08333e-06	-0.000183333	-4.79167e-05	1.875e-05	5.41667e-05	-1.04167e-05		5.4	0	0	0	0	0	0	0	0		-0.000183333	-1.45833e-05	-2.08333e-06	-0.000183333	-4.79167e-05	1.875e-05	5.41667e-05	-1.04167e-05		3.36111e-08	2.12674e-10	4.34028e-12	3.36111e-08	2.29601e-09	3.51562e-10	2.93403e-09	1.08507e-10
5.6	1.66667e-05	0.000135417	-5.20833e-05	-8.33333e-05	-0.000147917	-0.00013125	0.000154167	0.000189583		5.6	0	0	0	0	0	0	0	0		1.66667e-05	0.000135417	-5.20833e-05	-8.33333e-05	-0.000147917	-0.00013125	0.000154167	0.000189583		2.77778e-10	1.83377e-08	2.71267e-09	6.94444e-09	2.18793e-08	1.72266e-08	2.37674e-08	3.59418e-08
5.8	-8.33333e-05	-0.000114583	4.79167e-05	-8.33333e-05	-0.000147917	-3.125e-05	-0.000145833	-1.04167e-05		5.8	0	0	0	0	0	0	0	0		-8.33333e-05	-0.000114583	4.79167e-05	-8.33333e-05	-0.000147917	-3.125e-05	-0.000145833	-1.04167e-05		6.94444e-09	1.31293e-08	2.29601e-09	6.94444e-09	2.18793e-08	9.76563e-10	2.12674e-08	1.08507e-10
6	6.66667e-05	-0.000164583	-5.20833e-05	1.66667e-05	-0.000147917	-0.00013125	-0.000145833	-0.000110417		6	0	0	0	0	0	0	0	0		6.66667e-05	-0.000164583	-5.20833e-05	1.66667e-05	-0.000147917	-0.00013125	-0.000145833	-0.000110417		4.44444e-09	2.70877e-08	2.71267e-09	2.77778e-10	2.18793e-08	1.72266e-08	2.12674e-08	1.21918e-08
6.2	-0.000133333	3.54167e-05	-5.20833e-05	-3.33333e-05	-0.000147917	6.875e-05	4.16667e-06	0.000139583		6.2	0	0	0	0	0	0	0	0		-0.000133333	3.54167e-05	-5.20833e-05	-3.33333e-05	-0.000147917	6.875e-05	4.16667e-06	0.000139583		1.77778e-08	1.25434e-09	2.71267e-09	1.11111e-09	2.18793e-08	4.72656e-09	1.73611e-11	1.94835e-08
6.4	-0.000133333	0.000185417	-0.000102083	-3.33333e-05	-0.000147917	-8.125e-05	4.16667e-06	8.95833e-05		6.4	0	0	0	0	0	0	0	0		-0.000133333	0.000185417	-0.000102083	-3.33333e-05	-0.000147917	-8.125e-05	4.16667e-06	8.95833e-05		1.77778e-08	3.43793e-08	1.0421e-08	1.11111e-09	2.18793e-08	6.60156e-09	1.73611e-11	8.02517e-09
6.6	-8.33333e-05	-0.000114583	4.79167e-05	1.66667e-05	-0.000147917	6.875e-05	5.41667e-05	-0.000160417		6.6	0	0	0	0	0	0	0	0		-8.33333e-05	-0.000114583	4.79167e-05	1.66667e-05	-0.000147917	6.875e-05	5.41667e-05	-0.000160417		6.94444e-09	1.31293e-08	2.29601e-09	2.77778e-10	2.18793e-08	4.72656e-09	2.93403e-09	2.57335e-08
6.8	-0.000133333	-6.45833e-05	-5.20833e-05	6.66667e-05	-4.79167e-05	-3.125e-05	0.000104167	3.95833e-05		6.8	0	0	0	0	0	0	0	0		-0.000133333	-6.45833e-05	-5.20833e-05	6.66667e-05	-4.79167e-05	-3.125e-05	0.000104167	3.95833e-05		1.77778e-08	4.17101e-09	2.71267e-09	4.44444e-09	2.29601e-09	9.76563e-10	1.08507e-08	1.56684e-09
7	6.66667e-05	3.54167e-05	-2.08333e-06	0.000316667	-4.79167e-05	0.00011875	0.000354167	-1.04167e-05		7	0	0	0	0	0	0	0	0		6.66667e-05	3.54167e-05	-2.08333e-06	0.000316667	-4.79167e-05	0.00011875	0.000354167	-1.04167e-05		4.44444e-09	1.25434e-09	4.34028e-12	1.00278e-07	2.29601e-09	1.41016e-08	1.25434e-07	1.08507e-10
7.2	1.66667e-05	-0.000114583	-2.08333e-06	-0.000133333	-4.79167e-05	1.875e-05	-0.000145833	0.000189583		7.2	0	0	0	0	0	0	0	0		1.66667e-05	-0.000114583	-2.08333e-06	-0.000133333	-4.79167e-05	1.875e-05	-0.000145833	0.000189583		2.77778e-10	1.31293e-08	4.34028e-12	1.77778e-08	2.29601e-09	3.51562e-10	2.12674e-08	3.59418e-08
7.4	0.000216667	-0.000114583	9.79167e-05	-8.33333e-05	-0.000197917	0.00021875	-4.58333e-05	-1.04167e-05		7.4	0	0	0	0	0	0	0	0		0.000216667	-0.000114583	9.79167e-05	-8.33333e-05	-0.000197917	0.00021875	-4.58333e-05	-1.04167e-05		4.69444e-08	1.31293e-08	9.58767e-09	6.94444e-09	3.9171e-08	4.78516e-08	2.10069e-09	1.08507e-10
7.6	-8.33333e-05	3.54167e-05	0.000147917	-8.33333e-05	2.08333e-06	1.875e-05	4.16667e-06	-6.04167e-05		7.6	0	0	0	0	0	0	0	0		-8.33333e-05	3.54167e-05	0.000147917	-8.33333e-05	2.08333e-06	1.875e-05	4.16667e-06	-6.04167e-05		6.94444e-09	1.25434e-09	2.18793e-08	6.94444e-09	4.34028e-12	3.51562e-10	1.73611e-11	3.65017e-09
7.8	-0.000183333	3.54167e-05	0.000147917	-3.33333e-05	5.20833e-05	6.875e-05	-4.58333e-05	0.000139583		7.8	0	0	0	0	0	0	0	0		-0.000183333	3.54167e-05	0.000147917	-3.33333e-05	5.20833e-05	6.875e-05	-4.58333e-05	0.000139583		3.36111e-08	1.25434e-09	2.18793e-08	1.11111e-09	2.71267e-09	4.72656e-09	2.10069e-09	1.94835e-08
8	1.66667e-05	-0.000114583	0.000247917	-3.33333e-05	2.08333e-06	1.875e-05	5.41667e-05	-6.04167e-05		8	0	0	0	0	0	0	0	0		1.66667e-05	-0.000114583	0.000247917	-3.33333e-05	2.08333e-06	1.875e-05	5.41667e-05	-6.04167e-05		2.77778e-10	1.31293e-08	6.14627e-08	1.11111e-09	4.34028e-12	3.51562e-10	2.93403e-09	3.65017e-09
8.2	-8.33333e-05	-6.45833e-05	0.000297917	-3.33333e-05	2.08333e-06	-0.00013125	0.000154167	-0.000210417		8.2	0	0	0	0	0	0	0	0		-8.33333e-05	-6.45833e-05	0.000297917	-3.33333e-05	2.08333e-06	-0.00013125	0.000154167	-0.000210417		6.94444e-09	4.17101e-09	8.87543e-08	1.11111e-09	4.34028e-12	1.72266e-08	2.37674e-08	4.42752e-08
8.4	0.000116667	-1.45833e-05	0.000447917	1.66667e-05	2.08333e-06	-3.125e-05	-0.000145833	3.95833e-05		8.4	0	0	0	0	0	0	0	0		0.000116667	-1.45833e-05	0.000447917	1.66667e-05	2.08333e-06	-3.125e-05	-0.000145833	3.95833e-05		1.36111e-08	2.12674e-10	2.00629e-07	2.77778e-10	4.34028e-12	9.76563e-10	2.12674e-08	1.56684e-09
8.6	1.66667e-05	3.54167e-05	0.000447917	1.66667e-05	-4.79167e-05	-0.00018125	-0.000145833	-1.04167e-05		8.6	0	0	0	0	0	0	0	0		1.66667e-05	3.54167e-05	0.000447917	1.66667e-05	-4.79167e-05	-0.00018125	-0.000145833	-1.04167e-05		2.77778e-10	1.25434e-09	2.00629e-07	2.77778e-10	2.29601e-09	3.28516e-08	2.12674e-08	1.08507e-10
8.8	-0.000183333	-0.000214583	0.000247917	0.000116667	5.20833e-05	1.875e-05	-4.58333e-05	0.000289583		8.8	0	0	0	0	0	0	0	0		-0.000183333	-0.000214583	0.000247917	0.000116667	5.20833e-05	1.875e-05	-4.58333e-05	0.000289583		3.36111e-08	4.6046e-08	6.14627e-08	1.36111e-08	2.71267e-09	3.51562e-10	2.10069e-09	8.38585e-08
9	-3.33333e-05	-6.45833e-05	0.000247917	1.66667e-05	2.08333e-06	-0.00018125	4.16667e-06	-6.04167e-05		9	0	0	0	0	0	0	0	0		-3.33333e-05	-6.45833e-05	0.000247917	1.66667e-05	2.08333e-06	-0.00018125	4.16667e-06	-6.04167e-05		1.11111e-09	4.17101e-09	6.14627e-08	2.77778e-10	4.34028e-12	3.28516e-08	1.73611e-11	3.65017e-09
9.2	-8.33333e-05	-0.000114583	0.000197917	-0.000133333	2.08333e-06	6.875e-05	4.16667e-06	-6.04167e-05		9.2	0	0	0	0	0	0	0	0		-8.33333e-05	-0.000114583	0.000197917	-0.000133333	2.08333e-06	6.875e-05	4.16667e-06	-6.04167e-05		6.94444e-09	1.31293e-08	3.9171e-08	1.77778e-08	4.34028e-12	4.72656e-09	1.73611e-11	3.65017e-09
9.4	6.66667e-05	3.54167e-05	0.000247917	-8.33333e-05	5.20833e-05	-8.125e-05	0.000104167	0.000139583		9.4	0	0	0	0	0	0	0	0		6.66667e-05	3.54167e-05	0.000247917	-8.33333e-05	5.20833e-05	-8.125e-05	0.000104167	0.000139583		4.44444e-09	1.25434e-09	6.14627e-08	6.94444e-09	2.71267e-09	6.60156e-09	1.08507e-08	1.94835e-08
9.6	-3.33333e-05	-0.000214583	0.000197917	-8.33333e-05	0.000102083	0.00011875	0.000154167	-6.04167e-05		9.6	0	0	0	0	0	0	0	0		-3.33333e-05	-0.000214583	0.000197917	-8.33333e-05	0.000102083	0.00011875	0.000154167	-6.04167e-05		1.11111e-09	4.6046e-08	3.9171e-08	6.94444e-09	1.0421e-08	1.41016e-08	2.37674e-08	3.65017e-09
9.8	1.66667e-05	-6.45833e-05	0.000197917	-3.33333e-05	5.20833e-05	-3.125e-05	-0.000195833	-0.000160417		9.8	0	0	0	0	0	0	0	0		1.66667e-05	-6.45833e-05	0.000197917	-3.33333e-05	5.20833e-05	-3.125e-05	-0.000195833	-0.000160417		2.77778e-10	4.17101e-09	3.9171e-08	1.11111e-09	2.71267e-09	9.76563e-10	3.83507e-08	2.57335e-08
10	-8.33333e-05	-6.45833e-05	0.000147917	-3.33333e-05	0.000202083	0.00011875	-4.58333e-05	3.95833e-05		10	0	0	0	0	0	0	0	0		-8.33333e-05	-6.45833e-05	0.000147917	-3.33333e-05	0.000202083	0.00011875	-4.58333e-05	3.95833e-05		6.94444e-09	4.17101e-09	2.18793e-08	1.11111e-09	4.08377e-08	1.41016e-08	2.10069e-09	1.56684e-09
10.2	-0.000183333	8.54167e-05	0.000147917	-8.33333e-05	5.20833e-05	6.875e-05	-4.58333e-05	-1.04167e-05		10.2	0	0	0	0	0	0	0	0		-0.000183333	8.54167e-05	0.000147917	-8.33333e-05	5.20833e-05	6.875e-05	-4.58333e-05	-1.04167e-05		3.36111e-08	7.29601e-09	2.18793e-08	6.94444e-09	2.71267e-09	4.72656e-09	2.10069e-09	1.08507e-10
10.4	1.66667e-05	-0.000164583	0.000147917	-3.33333e-05	-0.000147917	0.00026875	-4.58333e-05	0.000239583		10.4	0	0	0	0	0	0	0	0		1.66667e-05	-0.000164583	0.000147917	-3.33333e-05	-0.000147917	0.00026875	-4.58333e-05	0.000239583		2.77778e-10	2.70877e-08	2.18793e-08	1.11111e-09	2.18793e-08	7.22266e-08	2.10069e-09	5.74002e-08
10.6	-8.33333e-05	0.0137354	0.000147917	6.66667e-05	-0.000147917	6.875e-05	4.16667e-06	-1.04167e-05		10.6	0	0	0	0	0	0	0	0		-8.33333e-05	0.0137354	0.000147917	6.66667e-05	-0.000147917	6.875e-05	4.16667e-06	-1.04167e-05		6.94444e-09	0.000188662	2.18793e-08	4.44444e-09	2.18793e-08	4.72656e-09	1.73611e-11	1.08507e-10
10.8	0.00841667	0.0145854	0.000147917	0.000116667	-0.000197917	-8.125e-05	0.000154167	-6.04167e-05		10.8	0	0.0318	0	0	0	0	0	0		0.00841667	-0.0172146	0.000147917	0.000116667	-0.000197917	-8.125e-05	0.000154167	-6.04167e-05		7.08403e-05	0.000296342	2.18793e-08	1.36111e-08	3.9171e-08	6.60156e-09	2.37674e-08	3.65017e-09
11	0.0115667	0.0161854	0.00574792	-0.000133333	-0.000197917	-3.125e-05	-9.58333e-05	8.95833e-05		11	0	0.0287	0	0	0	0	0	0		0.0115667	-0.0125146	0.00574792	-0.000133333	-0.000197917	-3.125e-05	-9.58333e-05	8.95833e-05		0.000133788	0.000156615	3.30385e-05	1.77778e-08	3.9171e-08	9.76563e-10	9.18403e-09	8.02517e-09
11.2	0.0124667	0.0204354	0.0185479	-0.000183333	-0.000147917	-0.00013125	-0.000145833	-1.04167e-05		11.2	0.033	0.0701	0	0	0	0	0	0		-0.0205333	-0.0496646	0.0185479	-0.000183333	-0.000147917	-0.00013125	-0.000145833	-1.04167e-05		0.000421618	0.00246657	0.000344025	3.36111e-08	2.18793e-08	1.72266e-08	2.12674e-08	1.08507e-10
11.4	0.0140667	0.0311854	0.0208479	1.66667e-05	-0.000147917	-3.125e-05	4.16667e-06	-0.000160417		11.4	0.0567	0.0762	0.0361	0	0	0	0	0		-0.0426333	-0.0450146	-0.0152521	1.66667e-05	-0.000147917	-3.125e-05	4.16667e-06	-0.000160417		0.0018176	0.00202631	0.000232626	2.77778e-10	2.18793e-08	9.76563e-10	1.73611e-11	2.57335e-08
11.6	0.0169667	0.0344854	0.0205979	0.00571667	-9.79167e-05	-0.00018125	4.16667e-06	3.95833e-05		11.6	0.0629	0.0775	0.0464	0	0	0	0	0		-0.0459333	-0.0430146	-0.0258021	0.00571667	-9.79167e-05	-0.00018125	4.16667e-06	3.95833e-05		0.00210987	0.00185025	0.000665748	3.26803e-05	9.58767e-09	3.28516e-08	1.73611e-11	1.56684e-09
11.8	0.0192667	0.0433354	0.0209979	0.00621667	0.00110208	1.875e-05	-4.58333e-05	-1.04167e-05		11.8	0.0657	0.0815	0.0599	0	0	0	0	0		-0.0464333	-0.0381646	-0.0389021	0.00621667	0.00110208	1.875e-05	-4.58333e-05	-1.04167e-05		0.00215605	0.00145654	0.00151337	3.86469e-05	1.21459e-06	3.51562e-10	2.10069e-09	1.08507e-10
12	0.0206667	0.0418854	0.0242979	0.0123167	0.00745208	0.0118687	0.000104167	0.000139583		12	0.0721	0.0847	0.0504	0.0247	0	0	0	0		-0.0514333	-0.0428146	-0.0261021	-0.0123833	0.00745208	0.0118687	0.000104167	0.000139583		0.00264539	0.00183309	0.000681319	0.000153347	5.55335e-05	0.000140867	1.08507e-08	1.94835e-08
12.2	0.0227667	0.0426854	0.0269479	0.0175167	0.00855208	0.0162688	0.000104167	-6.04167e-05		12.2	0.0729	0.0876	0.0642	0.0212	0	0.0109	0	0		-0.0501333	-0.0449146	-0.0372521	-0.00368333	0.00855208	0.00536875	0.000104167	-6.04167e-05		0.00251335	0.00201732	0.00138772	1.35669e-05	7.31381e-05	2.88235e-05	1.08507e-08	3.65017e-09
12.4	0.0370167	0.0522854	0.0327979	0.0184667	0.0101521	0.0425188	0.000104167	-0.000110417		12.4	0.0753	0.0882	0.0867	0.0442	0.014	0.028	0	0		-0.0382833	-0.0359146	-0.0539021	-0.0257333	-0.00384792	0.0145188	0.000104167	-0.000110417		0.00146561	0.00128986	0.00290543	0.000662204	1.48065e-05	0.000210794	1.08507e-08	1.21918e-08
12.6	0.0513167	0.0502354	0.0474979	0.0211167	0.0144521	0.0484187	0.00265417	0.000189583		12.6	0.0771	0.0872	0.0822	0.0372	0.0129	0.0297	0.0104	0		-0.0257833	-0.0369646	-0.0347021	-0.0160833	0.00155208	0.0187187	-0.00774583	0.000189583		0.00066478	0.00136638	0.00120423	0.000258674	2.40896e-06	0.000350392	5.99979e-05	3.59418e-08
12.8	0.0504667	0.0502854	0.0529479	0.0242667	0.0290021	0.0415688	0.00795417	3.95833e-05		12.8	0.0793	0.0885	0.0835	0.0257	0.0217	0.0356	0.0058	0		-0.0288333	-0.0382146	-0.0305521	-0.00143333	0.00730208	0.00596875	0.00215417	3.95833e-05		0.000831361	0.00146035	0.00093343	2.05444e-06	5.33204e-05	3.5626e-05	4.64043e-06	1.56684e-09
13	0.0553667	0.0600354	0.0574979	0.0306667	0.0300021	0.0506187	0.0110042	8.95833e-05		13	0.0794	0.0889	0.0834	0.0234	0.016	0.0378	0.0106	0		-0.0240333	-0.0288646	-0.0259021	0.00726667	0.0140021	0.0128187	0.000404167	8.95833e-05		0.000577601	0.000833164	0.000670918	5.28044e-05	0.000196058	0.00016432	1.63351e-07	8.02517e-09
13.2	0.0586167	0.0664354	0.0571479	0.0410167	0.0310021	0.0502187	0.0187042	0.00468958		13.2	0.0812	0.0878	0.0847	0.0332	0.0185	0.0368	0.0246	0		-0.0225833	-0.0213646	-0.0275521	0.00781667	0.0125021	0.0134188	-0.00589583	0.00468958		0.000510007	0.000456445	0.000759117	6.11003e-05	0.000156302	0.000180063	3.47609e-05	2.19922e-05
13.4	0.0588667	0.0807854	0.0616979	0.0453167	0.0312521	0.0530187	0.0261042	0.00548958		13.4	0.0836	0.0872	0.0854	0.0638	0.0322	0.0402	0.023	0		-0.0247333	-0.00641458	-0.0237021	-0.0184833	-0.000947917	0.0128187	0.00310417	0.00548958		0.000611738	4.11469e-05	0.000561789	0.000341634	8.98546e-07	0.00016432	9.63585e-06	3.01355e-05
13.6	0.0640167	0.0999354	0.0680979	0.0525667	0.0360521	0.0475187	0.0272042	0.00668958		13.6	0.0835	0.087	0.085	0.0663	0.0362	0.0385	0.0249	0.0059		-0.0194833	0.0129354	-0.0169021	-0.0137333	-0.000147917	0.00901875	0.00230417	0.000789583		0.0003796	0.000167325	0.00028568	0.000188604	2.18793e-08	8.13379e-05	5.30918e-06	6.23442e-07
13.8	0.0648667	0.103835	0.0648979	0.0567167	0.0328521	0.0536188	0.0282042	0.00648958		13.8	0.0824	0.0867	0.085	0.062	0.0369	0.0382	0.0245	0.0091		-0.0175333	0.0171354	-0.0201021	-0.00528333	-0.00404792	0.0154188	0.00370417	-0.00261042		0.000307418	0.000293623	0.000404094	2.79136e-05	1.63856e-05	0.000237738	1.37209e-05	6.81428e-06
14	0.0703667	0.104885	0.0633479	0.0576667	0.0339021	0.0509688	0.0254042	0.00568958		14	0.0815	0.0877	0.0847	0.0591	0.036	0.0386	0.0307	0.0085		-0.0111333	0.0171854	-0.0213521	-0.00143333	-0.00209792	0.0123687	-0.00529583	-0.00281042		0.000123951	0.000295339	0.000455911	2.05444e-06	4.40125e-06	0.000152986	2.80459e-05	7.89844e-06
14.2	0.0714667	0.0901354	0.0626479	0.0662667	0.0311521	0.0590688	0.0255042	0.00778958		14.2	0.0811	0.0885	0.0846	0.0594	0.0362	0.0395	0.0298	0.0114		-0.00963333	0.00163542	-0.0219521	0.00686667	-0.00504792	0.0195688	-0.00429583	-0.00361042		9.28011e-05	2.67459e-06	0.000481894	4.71511e-05	2.54815e-05	0.000382936	1.84542e-05	1.30351e-05
14.4	0.0730167	0.0811354	0.0613979	0.0728667	0.0369521	0.0615688	0.0277042	0.00593958		14.4	0.0805	0.0888	0.0843	0.0601	0.0371	0.0383	0.0309	0.0118		-0.00748333	-0.00766458	-0.0229021	0.0127667	-0.000147917	0.0232688	-0.00319583	-0.00586042		5.60003e-05	5.87458e-05	0.000524505	0.000162988	2.18793e-08	0.000541435	1.02134e-05	3.43445e-05
14.6	0.0664667	0.0796854	0.0649979	0.0659667	0.0374521	0.0549688	0.0339542	0.00478958		14.6	0.0801	0.0884	0.0846	0.0621	0.0386	0.038	0.0311	0.0125		-0.0136333	-0.00871458	-0.0196021	0.00386667	-0.00114792	0.0169688	0.00285417	-0.00771042		0.000185868	7.5944e-05	0.000384242	1.49511e-05	1.31771e-06	0.000287938	8.14627e-06	5.94505e-05
14.8	0.0705167	0.0702354	0.0713979	0.0628667	0.0395521	0.0575688	0.0326042	0.0101896		14.8	0.0802	0.0879	0.0853	0.0603	0.0408	0.0387	0.0333	0.0114		-0.00968333	-0.0176646	-0.0139021	0.00256667	-0.00124792	0.0188688	-0.000695833	-0.00121042		9.37669e-05	0.000312038	0.000193268	6.58778e-06	1.5573e-06	0.00035603	4.84184e-07	1.46511e-06
15	0.0714167	0.0808354	0.0706479	0.0600167	0.0395521	0.0593187	0.0361042	0.0113896		15	0.0794	0.0873	0.0855	0.0588	0.0422	0.039	0.033	0.0114		-0.00798333	-0.00646458	-0.0148521	0.00121667	-0.00264792	0.0203187	0.00310417	-1.04167e-05		6.37336e-05	4.17908e-05	0.000220584	1.48028e-06	7.01146e-06	0.000412852	9.63585e-06	1.08507e-10
15.2	0.0700167	0.0779354	0.0666979	0.0634667	0.0364521	0.0613687	0.0398542	0.00853958		15.2	0.0785	0.087	0.0847	0.0582	0.0431	0.0385	0.035	0.0125		-0.00848333	-0.00906458	-0.0180021	0.00526667	-0.00664792	0.0228688	0.00485417	-0.00396042		7.19669e-05	8.21667e-05	0.000324075	2.77378e-05	4.41948e-05	0.00052298	2.35629e-05	1.56849e-05
15.4	0.0714167	0.0752854	0.0634979	0.0632667	0.0340521	0.0527688	0.0355542	0.00673958		15.4	0.0781	0.0863	0.0841	0.0594	0.0433	0.0385	0.0364	0.013		-0.00668333	-0.0110146	-0.0206021	0.00386667	-0.00924792	0.0142688	-0.000845833	-0.00626042		4.46669e-05	0.000121321	0.000424446	1.49511e-05	8.5524e-05	0.000203597	7.15434e-07	3.91928e-05
15.6	0.0734667	0.0771354	0.0663979	0.0655667	0.0370021	0.0539187	0.0368042	0.00553958		15.6	0.0778	0.0855	0.0834	0.0598	0.0429	0.039	0.0366	0.0134		-0.00433333	-0.00836458	-0.0170021	0.00576667	-0.00589792	0.0149187	0.000204167	-0.00786042		1.87778e-05	6.99663e-05	0.000289071	3.32544e-05	3.47854e-05	0.000222569	4.1684e-08	6.17862e-05
15.8	0.0733167	0.0753854	0.0696979	0.0672667	0.0391521	0.0608687	0.0399042	0.00863958		15.8	0.0779	0.0844	0.0824	0.0599	0.043	0.0403	0.0364	0.0134		-0.00458333	-0.00901458	-0.0127021	0.00736667	-0.00384792	0.0205687	0.00350417	-0.00476042		2.10069e-05	8.12627e-05	0.000161343	5.42678e-05	1.48065e-05	0.000423073	1.22792e-05	2.26616e-05
16	0.0724667	0.0785854	0.0715479	0.0697667	0.0365521	0.0568687	0.0390542	0.0102896		16	0.0778	0.0835	0.0818	0.0604	0.0424	0.0415	0.0366	0.0131		-0.00533333	-0.00491458	-0.0102521	0.00936667	-0.00584792	0.0153687	0.00245417	-0.00281042		2.84444e-05	2.41531e-05	0.000105105	8.77344e-05	3.41981e-05	0.000236198	6.02293e-06	7.89844e-06
16.2	0.0722667	0.0750354	0.0678979	0.0679667	0.0357021	0.0653688	0.0362542	0.0115396		16.2	0.0774	0.0825	0.0811	0.0604	0.0418	0.0424	0.0367	0.0131		-0.00513333	-0.00746458	-0.0132021	0.00756667	-0.00609792	0.0229688	-0.000445833	-0.00156042		2.63511e-05	5.572e-05	0.000174295	5.72544e-05	3.71846e-05	0.000527563	1.98767e-07	2.4349e-06
16.4	0.0714167	0.0798354	0.0635979	0.0665167	0.0343521	0.0634688	0.0396042	0.0226396		16.4	0.0771	0.0818	0.0807	0.0605	0.0413	0.0434	0.0376	0.0146		-0.00568333	-0.00196458	-0.0171021	0.00601667	-0.00694792	0.0200688	0.00200417	0.00803958		3.23003e-05	3.85959e-06	0.000292481	3.62003e-05	4.82735e-05	0.000402755	4.01668e-06	6.46349e-05
16.6	0.0757167	0.0795854	0.0657979	0.0678667	0.0404021	0.0534188	0.0397542	0.0157896		16.6	0.0764	0.0816	0.0806	0.0604	0.0415	0.0438	0.0395	0.0166		-0.000683333	-0.00201458	-0.0148021	0.00746667	-0.00109792	0.00961875	0.000254167	-0.000810417		4.66944e-07	4.05855e-06	0.000219102	5.57511e-05	1.20542e-06	9.25204e-05	6.46007e-08	6.56775e-07
16.8	0.0736167	0.0795354	0.0666979	0.0710667	0.0411521	0.0536688	0.0440042	0.0108396		16.8	0.0758	0.0815	0.0807	0.0604	0.043	0.044	0.04	0.0168		-0.00218333	-0.00196458	-0.0140021	0.0106667	-0.00184792	0.00966875	0.00400417	-0.00596042		4.76694e-06	3.85959e-06	0.000196058	0.000113778	3.4148e-06	9.34847e-05	1.60334e-05	3.55266e-05
17	0.0707167	0.0790354	0.0704979	0.0731667	0.0393521	0.0560187	0.0465042	0.0157396		17	0.0754	0.0818	0.0805	0.0604	0.0447	0.0444	0.0396	0.0201		-0.00468333	-0.00276458	-0.0100021	0.0127667	-0.00534792	0.0116187	0.00690417	-0.00436042		2.19336e-05	7.64292e-06	0.000100042	0.000162988	2.86002e-05	0.000134995	4.76675e-05	1.90132e-05
17.2	0.0716167	0.0801354	0.0677979	0.0695667	0.0405521	0.0577187	0.0456542	0.0189896		17.2	0.0755	0.0819	0.0802	0.0597	0.0446	0.0447	0.0381	0.0213		-0.00388333	-0.00176458	-0.0124021	0.00986667	-0.00404792	0.0130188	0.00755417	-0.00231042		1.50803e-05	3.11375e-06	0.000153812	9.73511e-05	1.63856e-05	0.000169488	5.70654e-05	5.33803e-06
17.4	0.0689167	0.0817354	0.0684479	0.0669167	0.0388521	0.0670687	0.0424042	0.0181396		17.4	0.0756	0.0818	0.08	0.0595	0.044	0.0456	0.0378	0.0271		-0.00668333	-6.45833e-05	-0.0115521	0.00741667	-0.00514792	0.0214687	0.00460417	-0.00896042		4.46669e-05	4.17101e-09	0.000133451	5.50069e-05	2.6501e-05	0.000460907	2.11984e-05	8.02891e-05
17.6	0.0725167	0.0819354	0.0667979	0.0706667	0.0404021	0.0629187	0.0507042	0.0152896		17.6	0.0758	0.0817	0.08	0.0592	0.0435	0.046	0.0387	0.0283		-0.00328333	0.000235417	-0.0132021	0.0114667	-0.00309792	0.0169187	0.0120042	-0.0130104		1.07803e-05	5.5421e-08	0.000174295	0.000131484	9.59709e-06	0.000286244	0.0001441	0.000169271
17.8	0.0732167	0.0800354	0.0713979	0.0671667	0.0387521	0.0644688	0.0488542	0.0302396		17.8	0.0755	0.0816	0.0801	0.0591	0.0431	0.0454	0.0393	0.0269		-0.00228333	-0.00156458	-0.00870208	0.00806667	-0.00434792	0.0190688	0.00955417	0.00333958		5.21361e-06	2.44792e-06	7.57263e-05	6.50711e-05	1.89044e-05	0.000363617	9.12821e-05	1.11528e-05
18	0.0714667	0.0822354	0.0672979	0.0736167	0.0403021	0.0644187	0.0427042	0.0295396		18	0.075	0.0815	0.0801	0.0585	0.0432	0.0444	0.0402	0.0266		-0.00353333	0.000735417	-0.0128021	0.0151167	-0.00289792	0.0200187	0.00250417	0.00293958		1.24844e-05	5.40838e-07	0.000163893	0.000228514	8.39792e-06	0.00040075	6.27085e-06	8.64115e-06
18.2	0.0744167	0.0857354	0.0689479	0.0713667	0.0407521	0.0662188	0.0434042	0.0227396		18.2	0.0745	0.0812	0.0803	0.0582	0.0437	0.0435	0.0413	0.027		-8.33333e-05	0.00453542	-0.0113521	0.0131667	-0.00294792	0.0227188	0.00210417	-0.00426042		6.94444e-09	2.057e-05	0.00012887	0.000173361	8.69021e-06	0.000516142	4.42752e-06	1.81512e-05
18.4	0.0709667	0.0840354	0.0657979	0.0725167	0.0384021	0.0644187	0.0453542	0.0191896		18.4	0.0742	0.0808	0.08	0.0581	0.0444	0.0433	0.0421	0.0273		-0.00323333	0.00323542	-0.0142021	0.0144167	-0.00599792	0.0211187	0.00325417	-0.00811042		1.04544e-05	1.04679e-05	0.000201699	0.00020784	3.5975e-05	0.000446002	1.05896e-05	6.57789e-05
18.6	0.0699167	0.0804854	0.0621979	0.0687167	0.0356521	0.0622187	0.0447542	0.0221396		18.6	0.0741	0.0805	0.0792	0.0583	0.0447	0.0439	0.0418	0.0284		-0.00418333	-1.45833e-05	-0.0170021	0.0104167	-0.00904792	0.0183187	0.00295417	-0.00626042		1.75003e-05	2.12674e-10	0.000289071	0.000108507	8.18648e-05	0.000335577	8.7271e-06	3.91928e-05
18.8	0.0726667	0.0798854	0.0668979	0.0681667	0.0384521	0.0637687	0.0389542	0.0173396		18.8	0.0741	0.08	0.0785	0.0586	0.0448	0.0448	0.0413	0.0309		-0.00143333	-0.000114583	-0.0116021	0.00956667	-0.00634792	0.0189687	-0.00234583	-0.0135604		2.05444e-06	1.31293e-08	0.000134608	9.15211e-05	4.0296e-05	0.000359813	5.50293e-06	0.000183885
19	0.0710667	0.0833354	0.0696979	0.0681167	0.0408521	0.0702688	0.0414542	0.0156396		19	0.0739	0.0796	0.0779	0.0592	0.0448	0.0465	0.0414	0.0322		-0.00283333	0.00373542	-0.00820208	0.00891667	-0.00394792	0.0237688	5.41667e-05	-0.0165604		8.02778e-06	1.39533e-05	6.72742e-05	7.95069e-05	1.5586e-05	0.000564953	2.93403e-09	0.000274247
19.2	0.0712667	0.0774854	0.0698479	0.0731667	0.0425521	0.0720688	0.0438542	0.0322396		19.2	0.0738	0.0795	0.078	0.0596	0.0446	0.0477	0.0421	0.0345		-0.00253333	-0.00201458	-0.00815208	0.0135667	-0.00204792	0.0243688	0.00175417	-0.00226042		6.41778e-06	4.05855e-06	6.64565e-05	0.000184054	4.19396e-06	0.000593836	3.0771e-06	5.10948e-06
19.4	0.0710167	0.0795854	0.0655479	0.0706167	0.0432021	0.0730688	0.0456042	0.0192896		19.4	0.0738	0.0793	0.0783	0.0592	0.0447	0.047	0.0418	0.0353		-0.00278333	0.000285417	-0.0127521	0.0114167	-0.00149792	0.0260688	0.00380417	-0.0160104		7.74694e-06	8.14627e-08	0.000162616	0.00013034	2.24375e-06	0.00067958	1.44717e-05	0.000256333
19.6	0.0704167	0.0797354	0.0660979	0.0701167	0.0397021	0.0805188	0.0464042	0.0155396		19.6	0.0737	0.0792	0.0787	0.0591	0.0453	0.0459	0.0418	0.0346		-0.00328333	0.000535417	-0.0126021	0.0110167	-0.00559792	0.0346188	0.00460417	-0.0190604		1.07803e-05	2.86671e-07	0.000158813	0.000121367	3.13367e-05	0.00119846	2.11984e-05	0.000363299
19.8	0.0712667	0.0783854	0.0611479	0.0692667	0.0420021	0.0843688	0.0396542	0.0165896		19.8	0.0736	0.0792	0.0786	0.0592	0.0458	0.0451	0.0428	0.0341		-0.00233333	-0.000814583	-0.0174521	0.0100667	-0.00379792	0.0392688	-0.00314583	-0.0175104		5.44444e-06	6.63546e-07	0.000304575	0.000101338	1.44242e-05	0.00154203	9.89627e-06	0.000306615
20	0.0674167	0.0807354	0.0610979	0.0689167	0.0445521	0.0759688	0.0454542	0.0283896		20	0.0736	0.0793	0.0782	0.06	0.0459	0.0451	0.043	0.0335		-0.00618333	0.00143542	-0.0171021	0.00891667	-0.00134792	0.0308688	0.00245417	-0.00511042		3.82336e-05	2.06042e-06	0.000292481	7.95069e-05	1.81688e-06	0.00095288	6.02293e-06	2.61164e-05
20.2	0.0704667	0.0800354	0.0663479	0.0648167	0.0413021	0.0701187	0.0417542	0.0281896		20.2	0.0735	0.0793	0.0775	0.061	0.0454	0.0468	0.0433	0.0353		-0.00303333	0.000735417	-0.0111521	0.00381667	-0.00409792	0.0233187	-0.00154583	-0.00711042		9.20111e-06	5.40838e-07	0.000124369	1.45669e-05	1.67929e-05	0.000543764	2.3896e-06	5.0558e-05
20.4	0.0689167	0.0807854	0.0690979	0.0656667	0.0396021	0.0663688	0.0463042	0.0243896		20.4	0.0732	0.079	0.0769	0.0615	0.0444	0.049	0.0444	0.0369		-0.00428333	0.00178542	-0.00780208	0.00416667	-0.00479792	0.0173688	0.00190417	-0.0125104		1.83469e-05	3.18771e-06	6.08725e-05	1.73611e-05	2.302e-05	0.000301673	3.62585e-06	0.000156511
20.6	0.0704667	0.0790354	0.0686979	0.0707667	0.0400021	0.0624188	0.0455042	0.0203396		20.6	0.0727	0.0788	0.0769	0.0615	0.0434	0.0501	0.0456	0.0376		-0.00223333	0.000235417	-0.00820208	0.00926667	-0.00339792	0.0123188	-9.58333e-05	-0.0172604		4.98778e-06	5.5421e-08	6.72742e-05	8.58711e-05	1.15458e-05	0.000151752	9.18403e-09	0.000297922
20.8	0.0707667	0.0776354	0.0640479	0.0757667	0.0426021	0.0648187	0.0455542	0.0245396		20.8	0.072	0.0785	0.0773	0.0608	0.0435	0.0496	0.046	0.0381		-0.00123333	-0.000864583	-0.0132521	0.0149667	-0.000897917	0.0152187	-0.000445833	-0.0135604		1.52111e-06	7.47504e-07	0.000175618	0.000224001	8.06254e-07	0.00023161	1.98767e-07	0.000183885
21	0.0722167	0.0821854	0.0617479	0.0734167	0.0405021	0.0587188	0.0419542	0.0279896		21	0.0714	0.0781	0.0776	0.0593	0.0451	0.0486	0.0455	0.0387		0.000816667	0.00408542	-0.0158521	0.0141167	-0.00459792	0.0101188	-0.00354583	-0.0107104		6.66944e-07	1.66906e-05	0.000251289	0.00019928	2.11408e-05	0.000102389	1.25729e-05	0.000114713
21.2	0.0702167	0.0778854	0.0576979	0.0721667	0.0431521	0.0658688	0.0458542	0.0283896		21.2	0.071	0.0777	0.0775	0.0579	0.0475	0.0473	0.0445	0.0385		-0.000783333	0.000185417	-0.0198021	0.0142667	-0.00434792	0.0185688	0.00135417	-0.0101104		6.13611e-07	3.43793e-08	0.000392123	0.000203538	1.89044e-05	0.000344798	1.83377e-06	0.000102221
21.4	0.0678667	0.0782854	0.0620979	0.0670167	0.0404021	0.0697687	0.0420542	0.0335396		21.4	0.071	0.0773	0.0768	0.0579	0.048	0.047	0.0437	0.0382		-0.00313333	0.000985417	-0.0147021	0.00911667	-0.00759792	0.0227687	-0.00164583	-0.00466042		9.81778e-06	9.71046e-07	0.000216151	8.31136e-05	5.77283e-05	0.000518416	2.70877e-06	2.17195e-05
21.6	0.0696667	0.0801854	0.0661979	0.0665167	0.0404021	0.0759187	0.0423042	0.0315896		21.6	0.0711	0.0768	0.0757	0.0589	0.047	0.0473	0.0426	0.0388		-0.00143333	0.00338542	-0.00950208	0.00761667	-0.00659792	0.0286187	-0.000295833	-0.00721042		2.05444e-06	1.1461e-05	9.02896e-05	5.80136e-05	4.35325e-05	0.000819033	8.75174e-08	5.19901e-05
21.8	0.0707167	0.0798854	0.0676479	0.0726667	0.0373521	0.0711188	0.0436042	0.0322896		21.8	0.071	0.0763	0.0747	0.0599	0.0459	0.0479	0.0421	0.0374		-0.000283333	0.00358542	-0.00705208	0.0127667	-0.00854792	0.0232188	0.00150417	-0.00511042		8.02778e-08	1.28552e-05	4.97319e-05	0.000162988	7.30669e-05	0.00053911	2.26252e-06	2.61164e-05
22	0.0710667	0.0750854	0.0644479	0.0708667	0.0405021	0.0637188	0.0465542	0.0315896		22	0.0705	0.0759	0.0742	0.0601	0.0447	0.0481	0.0429	0.0338		0.000566667	-0.000814583	-0.00975208	0.0107667	-0.00419792	0.0156188	0.00365417	-0.00221042		3.21111e-07	6.63546e-07	9.51031e-05	0.000115921	1.76225e-05	0.000243945	1.33529e-05	4.88594e-06
22.2	0.0701167	0.0768854	0.0594979	0.0683667	0.0393021	0.0649688	0.0422042	0.0279896		22.2	0.0698	0.0754	0.0742	0.0599	0.0441	0.0473	0.0438	0.0321		0.000316667	0.00148542	-0.0147021	0.00846667	-0.00479792	0.0176688	-0.00159583	-0.00411042		1.00278e-07	2.20646e-06	0.000216151	7.16844e-05	2.302e-05	0.000312185	2.54668e-06	1.68955e-05
22.4	0.0674167	0.0801354	0.0594979	0.0642667	0.0423021	0.0629688	0.0411542	0.0235896		22.4	0.069	0.0749	0.0745	0.0591	0.0443	0.0459	0.0444	0.0334		-0.00158333	0.00523542	-0.0150021	0.00516667	-0.00199792	0.0170688	-0.00324583	-0.00981042		2.50694e-06	2.74096e-05	0.000225063	2.66944e-05	3.99167e-06	0.000291342	1.05354e-05	9.62443e-05
22.6	0.0686667	0.0806854	0.0611479	0.0611167	0.0429021	0.0647687	0.0430542	0.0268396		22.6	0.0685	0.0744	0.0746	0.0586	0.0445	0.0451	0.0449	0.0358		0.000166667	0.00628542	-0.0134521	0.00251667	-0.00159792	0.0196687	-0.00184583	-0.00896042		2.77778e-08	3.95065e-05	0.000180959	6.33361e-06	2.55334e-06	0.00038686	3.4071e-06	8.02891e-05
22.8	0.0664167	0.0792854	0.0637479	0.0652667	0.0394021	0.0612188	0.0425542	0.0332396		22.8	0.068	0.0739	0.074	0.0584	0.0445	0.0454	0.0453	0.0369		-0.00158333	0.00538542	-0.0102521	0.00686667	-0.00509792	0.0158187	-0.00274583	-0.00366042		2.50694e-06	2.90027e-05	0.000105105	4.71511e-05	2.59888e-05	0.000250233	7.5396e-06	1.33987e-05
23	0.0683667	0.0776354	0.0686479	0.0703667	0.0393021	0.0668187	0.0417542	0.0351896		23	0.0678	0.0737	0.073	0.0584	0.0442	0.0467	0.0449	0.0376		0.000566667	0.00393542	-0.00435208	0.0119667	-0.00489792	0.0201187	-0.00314583	-0.00241042		3.21111e-07	1.54875e-05	1.89406e-05	0.000143201	2.39896e-05	0.000404764	9.89627e-06	5.81011e-06
23.2	0.0674167	0.0772354	0.0703479	0.0694667	0.0358021	0.0663688	0.0480042	0.0364896		23.2	0.0677	0.0735	0.0719	0.0587	0.0442	0.0484	0.0447	0.0388		-0.000283333	0.00373542	-0.00155208	0.0107667	-0.00839792	0.0179688	0.00330417	-0.00231042		8.02778e-08	1.39533e-05	2.40896e-06	0.000115921	7.0525e-05	0.000322876	1.09175e-05	5.33803e-06
23.4	0.0707667	0.0806354	0.0630979	0.0720167	0.0399521	0.0658187	0.0467042	0.0336396		23.4	0.0674	0.0731	0.0712	0.0588	0.0446	0.05	0.0455	0.0396		0.00336667	0.00753542	-0.00810208	0.0132167	-0.00464792	0.0158187	0.00120417	-0.00596042		1.13344e-05	5.67825e-05	6.56438e-05	0.00017468	2.16031e-05	0.000250233	1.45002e-06	3.55266e-05
23.6	0.0676167	0.0766854	0.0600479	0.0709167	0.0482521	0.0697187	0.0455042	0.0299896		23.6	0.0671	0.0727	0.0711	0.0584	0.0451	0.05	0.0456	0.0389		0.000516667	0.00398542	-0.0110521	0.0125167	0.00315208	0.0197187	-9.58333e-05	-0.00891042		2.66944e-07	1.58835e-05	0.000122149	0.000156667	9.93563e-06	0.000388829	9.18403e-09	7.93955e-05
23.8	0.0669667	0.0775854	0.0579479	0.0652667	0.0439521	0.0713687	0.0449542	0.0317896		23.8	0.0667	0.0724	0.0716	0.0576	0.0454	0.0486	0.0442	0.0377		0.000266667	0.00518542	-0.0136521	0.00766667	-0.00144792	0.0227687	0.000754167	-0.00591042		7.11111e-08	2.68885e-05	0.000186379	5.87778e-05	2.09646e-06	0.000518416	5.68767e-07	3.4933e-05
24	0.0682167	0.0736854	0.0579979	0.0705167	0.0423021	0.0694688	0.0381042	0.0286396		24	0.0663	0.0721	0.0721	0.0567	0.045	0.0467	0.0423	0.0383		0.00191667	0.00158542	-0.0141021	0.0138167	-0.00269792	0.0227688	-0.00419583	-0.00966042		3.67361e-06	2.51355e-06	0.000198869	0.0001909	7.27875e-06	0.000518416	1.7605e-05	9.33237e-05
24.2	0.0658667	0.0739854	0.0611979	0.0680167	0.0413521	0.0716188	0.0401542	0.0363396		24.2	0.066	0.0721	0.0723	0.0561	0.0443	0.0455	0.0415	0.0376		-0.000133333	0.00188542	-0.0111021	0.0119167	-0.00294792	0.0261188	-0.00134583	-0.00126042		1.77778e-08	3.5548e-06	0.000123256	0.000142007	8.69021e-06	0.000682189	1.81127e-06	1.58865e-06
24.4	0.0659667	0.0725854	0.0635479	0.0708667	0.0415521	0.0651188	0.0423542	0.0304396		24.4	0.0659	0.0722	0.0718	0.0559	0.0433	0.0453	0.0415	0.0351		6.66667e-05	0.000385417	-0.00825208	0.0149667	-0.00174792	0.0198188	0.000854167	-0.00466042		4.44444e-09	1.48546e-07	6.80969e-05	0.000224001	3.05521e-06	0.000392783	7.29601e-07	2.17195e-05
24.6	0.0680167	0.0745854	0.0648979	0.0673167	0.0407521	0.0626188	0.0429042	0.0310396		24.6	0.0659	0.0722	0.0709	0.0561	0.0425	0.0452	0.0414	0.0332		0.00211667	0.00238542	-0.00600208	0.0112167	-0.00174792	0.0174188	0.00150417	-0.00216042		4.48028e-06	5.69021e-06	3.6025e-05	0.000125814	3.05521e-06	0.000303413	2.26252e-06	4.6674e-06
24.8	0.0678167	0.0734354	0.0612979	0.0618167	0.0394021	0.0609687	0.0483042	0.0334896		24.8	0.0659	0.072	0.07	0.0564	0.0423	0.0454	0.0422	0.0337		0.00191667	0.00143542	-0.00870208	0.00541667	-0.00289792	0.0155687	0.00610417	-0.000210417		3.67361e-06	2.06042e-06	7.57263e-05	2.93403e-05	8.39792e-06	0.000242386	3.72609e-05	4.42752e-08
25	0.0656167	0.0744854	0.0589979	0.0672667	0.0400521	0.0623187	0.0399042	0.0320896		25	0.0656	0.0717	0.0694	0.0566	0.0421	0.0458	0.0437	0.0353		1.66667e-05	0.00278542	-0.0104021	0.0106667	-0.00204792	0.0165187	-0.00379583	-0.00321042		2.77778e-10	7.75855e-06	0.000108203	0.000113778	4.19396e-06	0.000272869	1.44084e-05	1.03068e-05
25.2	0.0659167	0.0742854	0.0598479	0.0727167	0.0414021	0.0607188	0.0416042	0.0264896		25.2	0.0653	0.0714	0.0694	0.0568	0.0418	0.0463	0.0445	0.0362		0.000616667	0.00288542	-0.00955208	0.0159167	-0.000397917	0.0144188	-0.00289583	-0.00971042		3.80278e-07	8.32563e-06	9.12423e-05	0.00025334	1.58338e-07	0.0002079	8.38585e-06	9.42922e-05
25.4	0.0673167	0.0754854	0.0599479	0.0664167	0.0398021	0.0700188	0.0416542	0.0279396		25.4	0.0649	0.071	0.0699	0.0567	0.0418	0.0468	0.0444	0.0366		0.00241667	0.00448542	-0.00995208	0.00971667	-0.00199792	0.0232188	-0.00274583	-0.00866042		5.84028e-06	2.0119e-05	9.9044e-05	9.44136e-05	3.99167e-06	0.00053911	7.5396e-06	7.50028e-05
25.6	0.0660667	0.0723354	0.0611979	0.0661167	0.0427521	0.0708687	0.0435042	0.0327396		25.6	0.0646	0.0705	0.0705	0.0563	0.0422	0.0468	0.0439	0.0369		0.00146667	0.00183542	-0.00930208	0.00981667	0.000552083	0.0240687	-0.000395833	-0.00416042		2.15111e-06	3.36875e-06	8.65288e-05	9.63669e-05	3.04796e-07	0.000579305	1.56684e-07	1.73091e-05
25.8	0.0683667	0.0737354	0.0621479	0.0625167	0.0382521	0.0686688	0.0397042	0.0303896		25.8	0.0645	0.0703	0.0707	0.0559	0.0433	0.0466	0.0436	0.0375		0.00386667	0.00343542	-0.00855208	0.00661667	-0.00504792	0.0220687	-0.00389583	-0.00711042		1.49511e-05	1.18021e-05	7.31381e-05	4.37803e-05	2.54815e-05	0.00048703	1.51775e-05	5.0558e-05
26	0.0657667	0.0744354	0.0613979	0.0610667	0.0405021	0.0644688	0.0372542	0.0276396		26	0.0643	0.0703	0.0702	0.0559	0.0439	0.0463	0.0431	0.0375		0.00146667	0.00413542	-0.00880208	0.00516667	-0.00339792	0.0181688	-0.00584583	-0.00986042		2.15111e-06	1.71017e-05	7.74767e-05	2.66944e-05	1.15458e-05	0.000330103	3.41738e-05	9.72278e-05
26.2	0.0648667	0.0743354	0.0598979	0.0676167	0.0440521	0.0654187	0.0403042	0.0310396		26.2	0.0643	0.0702	0.0694	0.0557	0.0439	0.0461	0.0421	0.037		0.000566667	0.00413542	-0.00950208	0.0119167	0.000152083	0.0193187	-0.00179583	-0.00596042		3.21111e-07	1.71017e-05	9.02896e-05	0.000142007	2.31293e-08	0.000373214	3.22502e-06	3.55266e-05
26.4	0.0633667	0.0702354	0.0603979	0.0709667	0.0408021	0.0636687	0.0407542	0.0342896		26.4	0.0642	0.0699	0.0686	0.0554	0.0434	0.0459	0.0413	0.0369		-0.000833333	0.000335417	-0.00820208	0.0155667	-0.00259792	0.0177687	-0.000545833	-0.00261042		6.94444e-07	1.12504e-07	6.72742e-05	0.000242321	6.74917e-06	0.000315728	2.97934e-07	6.81428e-06
26.6	0.0613667	0.0751354	0.0594479	0.0659167	0.0356021	0.0615188	0.0418542	0.0251396		26.6	0.0637	0.0694	0.068	0.0549	0.0425	0.046	0.041	0.0374		-0.00233333	0.00573542	-0.00855208	0.0110167	-0.00689792	0.0155188	0.000854167	-0.0122604		5.44444e-06	3.2895e-05	7.31381e-05	0.000121367	4.75813e-05	0.000240832	7.29601e-07	0.000150318
26.8	0.0672667	0.0732854	0.0591479	0.0642667	0.0354021	0.0618187	0.0421542	0.0279896		26.8	0.063	0.0688	0.0678	0.0547	0.0415	0.046	0.0411	0.0364		0.00426667	0.00448542	-0.00865208	0.00956667	-0.00609792	0.0158187	0.00105417	-0.00841042		1.82044e-05	2.0119e-05	7.48585e-05	9.15211e-05	3.71846e-05	0.000250233	1.11127e-06	7.07351e-05
27	0.0649167	0.0719854	0.0597979	0.0653167	0.0386021	0.0628188	0.0390542	0.0308396		27	0.0624	0.0682	0.0681	0.0543	0.0407	0.0452	0.0412	0.0335		0.00251667	0.00378542	-0.00830208	0.0110167	-0.00209792	0.0176188	-0.00214583	-0.00266042		6.33361e-06	1.43294e-05	6.89246e-05	0.000121367	4.40125e-06	0.00031042	4.6046e-06	7.07782e-06
27.2	0.0600167	0.0711354	0.0599979	0.0686167	0.0366521	0.0671188	0.0421542	0.0284396		27.2	0.062	0.0677	0.0682	0.0536	0.0407	0.0439	0.041	0.0324		-0.00198333	0.00343542	-0.00820208	0.0150167	-0.00404792	0.0232188	0.00115417	-0.00396042		3.93361e-06	1.18021e-05	6.72742e-05	0.0002255	1.63856e-05	0.00053911	1.3321e-06	1.56849e-05
27.4	0.0662667	0.0746854	0.0592979	0.0642667	0.0405021	0.0703688	0.0406042	0.0296396		27.4	0.0617	0.0674	0.0677	0.0532	0.0412	0.0429	0.0414	0.0331		0.00456667	0.00728542	-0.00840208	0.0110667	-0.000697917	0.0274688	-0.000795833	-0.00346042		2.08544e-05	5.30773e-05	7.0595e-05	0.000122471	4.87088e-07	0.000754532	6.33351e-07	1.19745e-05
27.6	0.0610667	0.0709354	0.0585979	0.0635667	0.0384521	0.0698187	0.0395542	0.0329396		27.6	0.0616	0.0674	0.0667	0.0534	0.0414	0.0428	0.0417	0.0346		-0.000533333	0.00353542	-0.00810208	0.0101667	-0.00294792	0.0270188	-0.00214583	-0.00166042		2.84444e-07	1.24992e-05	6.56438e-05	0.000103361	8.69021e-06	0.000730013	4.6046e-06	2.75698e-06
27.8	0.0649167	0.0703354	0.0605479	0.0631667	0.0373521	0.0693187	0.0415542	0.0293396		27.8	0.0617	0.0673	0.0657	0.0538	0.0412	0.0431	0.0412	0.0361		0.00321667	0.00303542	-0.00515208	0.00936667	-0.00384792	0.0262187	0.000354167	-0.00676042		1.03469e-05	9.21375e-06	2.6544e-05	8.77344e-05	1.48065e-05	0.000687423	1.25434e-07	4.57032e-05
28	0.0628167	0.0711354	0.0619479	0.0626667	0.0394021	0.0630687	0.0446542	0.0233896		28	0.0617	0.0671	0.065	0.0537	0.0405	0.0436	0.041	0.0368		0.00111667	0.00403542	-0.00305208	0.00896667	-0.00109792	0.0194687	0.00365417	-0.0134104		1.24694e-06	1.62846e-05	9.31521e-06	8.04011e-05	1.20542e-06	0.000379032	1.33529e-05	0.000179839
28.2	0.0602167	0.0733354	0.0612979	0.0656167	0.0405521	0.0606187	0.0388042	0.0226896		28.2	0.0615	0.067	0.0649	0.0532	0.0398	0.0441	0.0414	0.0368		-0.00128333	0.00633542	-0.00360208	0.0124167	0.000752083	0.0165187	-0.00259583	-0.0141104		1.64694e-06	4.01375e-05	1.2975e-05	0.000154174	5.65629e-07	0.000272869	6.73835e-06	0.000199104
28.4	0.0623167	0.0714854	0.0617979	0.0673167	0.0423021	0.0614687	0.0472042	0.0260396		28.4	0.0611	0.0668	0.0654	0.053	0.0395	0.0446	0.0419	0.0364		0.00121667	0.00468542	-0.00360208	0.0143167	0.00280208	0.0168687	0.00530417	-0.0103604		1.48028e-06	2.19531e-05	1.2975e-05	0.000204967	7.85167e-06	0.000284555	2.81342e-05	0.000107338
28.6	0.0640167	0.0743354	0.0598979	0.0617667	0.0393521	0.0602187	0.0398042	0.0310896		28.6	0.0608	0.0665	0.0664	0.0528	0.0399	0.0444	0.0418	0.0355		0.00321667	0.00783542	-0.00650208	0.00896667	-0.000547917	0.0158187	-0.00199583	-0.00441042		1.03469e-05	6.13938e-05	4.22771e-05	8.04011e-05	3.00213e-07	0.000250233	3.98335e-06	1.94518e-05
28.8	0.0632167	0.0721354	0.0591979	0.0606667	0.0368521	0.0635687	0.0402042	0.0327896		28.8	0.0606	0.0663	0.067	0.0526	0.0407	0.0441	0.0412	0.0341		0.00261667	0.00583542	-0.00780208	0.00806667	-0.00384792	0.0194687	-0.000995833	-0.00131042		6.84694e-06	3.40521e-05	6.08725e-05	6.50711e-05	1.48065e-05	0.000379032	9.91684e-07	1.71719e-06
29	0.0622667	0.0721854	0.0617479	0.0612667	0.0387021	0.0578188	0.0409542	0.0327896		29	0.0605	0.0663	0.0668	0.0525	0.0412	0.0441	0.0405	0.0329		0.00176667	0.00588542	-0.00505208	0.00876667	-0.00249792	0.0137188	0.000454167	-0.000110417		3.12111e-06	3.46381e-05	2.55235e-05	7.68544e-05	6.23959e-06	0.000188204	2.06267e-07	1.21918e-08
29.2	0.0631167	0.0727854	0.0602479	0.0618667	0.0400021	0.0609188	0.0421542	0.0399896		29.2	0.0605	0.0663	0.0662	0.0528	0.041	0.044	0.0392	0.0331		0.00261667	0.00648542	-0.00595208	0.00906667	-0.000997917	0.0169188	0.00295417	0.00688958		6.84694e-06	4.20606e-05	3.54273e-05	8.22044e-05	9.95838e-07	0.000286244	8.7271e-06	4.74664e-05
29.4	0.0630667	0.0728354	0.0610479	0.0635167	0.0399521	0.0582188	0.0441042	0.0297396		29.4	0.0606	0.0663	0.0654	0.053	0.0405	0.044	0.0381	0.0333		0.00246667	0.00653542	-0.00435208	0.0105167	-0.000547917	0.0142188	0.00600417	-0.00356042		6.08444e-06	4.27117e-05	1.89406e-05	0.0001106	3.00213e-07	0.000202173	3.605e-05	1.26766e-05
29.6	0.0600667	0.0734354	0.0596979	0.0634167	0.0375521	0.0576687	0.0416542	0.0243896		29.6	0.0605	0.066	0.0648	0.0527	0.0398	0.0441	0.0378	0.0332		-0.000433333	0.00743542	-0.00510208	0.0107167	-0.00224792	0.0135687	0.00385417	-0.00881042		1.87778e-07	5.52854e-05	2.60313e-05	0.000114847	5.05313e-06	0.000184111	1.48546e-05	7.76234e-05
29.8	0.0603667	0.0701354	0.0596979	0.0644667	0.0386021	0.0562188	0.0408042	0.0306896		29.8	0.0601	0.0656	0.0644	0.0523	0.039	0.0438	0.0382	0.0332		0.000266667	0.00453542	-0.00470208	0.0121667	-0.000397917	0.0124188	0.00260417	-0.00251042		7.11111e-08	2.057e-05	2.21096e-05	0.000148028	1.58338e-07	0.000154225	6.78168e-06	6.30219e-06
30	0.0608167	0.0685354	0.0578479	0.0688667	0.0380021	0.0558188	0.0412542	0.0270396		30	0.0596	0.0652	0.0645	0.052	0.0385	0.0431	0.0392	0.0342		0.00121667	0.00333542	-0.00665208	0.0168667	-0.000497917	0.0127188	0.00205417	-0.00716042		1.48028e-06	1.1125e-05	4.42502e-05	0.000284484	2.47921e-07	0.000161767	4.2196e-06	5.12716e-05
30.2	0.0639167	0.0693354	0.0598979	0.0645667	0.0396521	0.0588687	0.0425542	0.0336396		30.2	0.0591	0.0647	0.0648	0.0516	0.0385	0.0422	0.0401	0.0354		0.00481667	0.00463542	-0.00490208	0.0129667	0.00115208	0.0166687	0.00245417	-0.00176042		2.32003e-05	2.14871e-05	2.40304e-05	0.000168134	1.3273e-06	0.000277847	6.02293e-06	3.09907e-06
30.4	0.0618167	0.0706354	0.0622979	0.0591667	0.0372521	0.0628188	0.0394042	0.0329396		30.4	0.0588	0.0644	0.0649	0.0513	0.0387	0.0413	0.0403	0.0361		0.00301667	0.00623542	-0.00260208	0.00786667	-0.00144792	0.0215188	-0.000895833	-0.00316042		9.10028e-06	3.88804e-05	6.77084e-06	6.18844e-05	2.09646e-06	0.000463057	8.02517e-07	9.98823e-06
30.6	0.0613667	0.0679354	0.0629479	0.0598667	0.0382521	0.0529688	0.0430042	0.0328896		30.6	0.0586	0.0641	0.0644	0.0513	0.0389	0.0409	0.0403	0.0353		0.00276667	0.00383542	-0.00145208	0.00856667	-0.000647917	0.0120688	0.00270417	-0.00241042		7.65444e-06	1.47104e-05	2.10855e-06	7.33878e-05	4.19796e-07	0.000145655	7.31252e-06	5.81011e-06
30.8	0.0592167	0.0731854	0.0618479	0.0579667	0.0391521	0.0536188	0.0382542	0.0333396		30.8	0.0586	0.0638	0.0636	0.0512	0.0389	0.0411	0.0399	0.0339		0.000616667	0.00938542	-0.00175208	0.00676667	0.000252083	0.0125188	-0.00164583	-0.000560417		3.80278e-07	8.8086e-05	3.0698e-06	4.57878e-05	6.3546e-08	0.000156719	2.70877e-06	3.14067e-07
31	0.0568167	0.0720354	0.0594979	0.0580167	0.0369021	0.0550187	0.0384042	0.0268396		31	0.0586	0.0636	0.0629	0.0509	0.0386	0.0414	0.0395	0.0333		-0.00178333	0.00843542	-0.00340208	0.00711667	-0.00169792	0.0136187	-0.00109583	-0.00646042		3.18028e-06	7.11563e-05	1.15742e-05	5.06469e-05	2.88292e-06	0.00018547	1.20085e-06	4.1737e-05
31.2	0.0598167	0.0688854	0.0572979	0.0586167	0.0366021	0.0514687	0.0420542	0.0308896		31.2	0.0585	0.0633	0.0623	0.0505	0.0383	0.0416	0.0394	0.033		0.00131667	0.00558542	-0.00500208	0.00811667	-0.00169792	0.00986875	0.00265417	-0.00211042		1.73361e-06	3.11969e-05	2.50208e-05	6.58803e-05	2.88292e-06	9.73922e-05	7.0446e-06	4.45386e-06
31.4	0.0607667	0.0698354	0.0567479	0.0634667	0.0385521	0.0548187	0.0373042	0.0320896		31.4	0.0581	0.0629	0.0621	0.0502	0.0382	0.042	0.0394	0.0325		0.00266667	0.00693542	-0.00535208	0.0132667	0.000352083	0.0128187	-0.00209583	-0.000410417		7.11111e-06	4.81e-05	2.86448e-05	0.000176004	1.23963e-07	0.00016432	4.39252e-06	1.68442e-07
31.6	0.0588667	0.0680354	0.0559479	0.0576167	0.0384521	0.0544688	0.0394042	0.0386896		31.6	0.0575	0.0624	0.0623	0.0501	0.0384	0.0426	0.0393	0.0322		0.00136667	0.00563542	-0.00635208	0.00751667	5.20833e-05	0.0118688	0.000104167	0.00648958		1.86778e-06	3.17579e-05	4.0349e-05	5.65003e-05	2.71267e-09	0.000140867	1.08507e-08	4.21147e-05
31.8	0.0611667	0.0663854	0.0560979	0.0552167	0.0385521	0.0515188	0.0387042	0.0297896		31.8	0.0569	0.0619	0.0627	0.0501	0.0385	0.043	0.0386	0.0325		0.00426667	0.00448542	-0.00660208	0.00511667	5.20833e-05	0.00851875	0.000104167	-0.00271042		1.82044e-05	2.0119e-05	4.35875e-05	2.61803e-05	2.71267e-09	7.25691e-05	1.08507e-08	7.34636e-06
32	0.0590667	0.0670354	0.0563479	0.0552667	0.0386521	0.0525687	0.0393542	0.0394396		32	0.0563	0.0614	0.0628	0.05	0.0383	0.0428	0.0374	0.033		0.00276667	0.00563542	-0.00645208	0.00526667	0.000352083	0.00976875	0.00195417	0.00643958		7.65444e-06	3.17579e-05	4.16294e-05	2.77378e-05	1.23963e-07	9.54285e-05	3.81877e-06	4.14682e-05
32.2	0.0568167	0.0669854	0.0558479	0.0556167	0.0408021	0.0573187	0.0366042	0.0330896		32.2	0.0558	0.061	0.0624	0.05	0.0379	0.0425	0.0366	0.0331		0.00101667	0.00598542	-0.00655208	0.00561667	0.00290208	0.0148187	4.16667e-06	-1.04167e-05		1.03361e-06	3.58252e-05	4.29298e-05	3.15469e-05	8.42209e-06	0.000219595	1.73611e-11	1.08507e-10
32.4	0.0572167	0.0683854	0.0568479	0.0601667	0.0400521	0.0526688	0.0375042	0.0342896		32.4	0.0555	0.0606	0.0616	0.0498	0.0373	0.0419	0.0364	0.0329		0.00171667	0.00778542	-0.00475208	0.0103667	0.00275208	0.0107688	0.00110417	0.00138958		2.94694e-06	6.06127e-05	2.25823e-05	0.000107468	7.57396e-06	0.000115966	1.21918e-06	1.93094e-06
32.6	0.0585667	0.0655354	0.0570479	0.0621167	0.0389021	0.0549188	0.0363542	0.0361896		32.6	0.0552	0.0605	0.0607	0.0495	0.0367	0.041	0.0362	0.0324		0.00336667	0.00503542	-0.00365208	0.0126167	0.00220208	0.0139188	0.000154167	0.00378958		1.13344e-05	2.53554e-05	1.33377e-05	0.00015918	4.84917e-06	0.000193732	2.37674e-08	1.43609e-05
32.8	0.0552667	0.0624354	0.0547479	0.0612667	0.0364521	0.0598187	0.0398542	0.0315896		32.8	0.0551	0.0603	0.06	0.0488	0.0364	0.0401	0.036	0.0321		0.000166667	0.00213542	-0.00525208	0.0124667	5.20833e-05	0.0197188	0.00385417	-0.000510417		2.77778e-08	4.56e-06	2.75844e-05	0.000155418	2.71267e-09	0.000388829	1.48546e-05	2.60525e-07
33	0.0580167	0.0685854	0.0534479	0.0561667	0.0387521	0.0608687	0.0373042	0.0327396		33	0.055	0.0602	0.0595	0.0482	0.0361	0.0394	0.0363	0.0324		0.00301667	0.00838542	-0.00605208	0.00796667	0.00265208	0.0214688	0.00100417	0.000339583		9.10028e-06	7.03152e-05	3.66277e-05	6.34678e-05	7.03355e-06	0.000460907	1.00835e-06	1.15317e-07
33.2	0.0577667	0.0700854	0.0543979	0.0576667	0.0377021	0.0552688	0.0410542	0.0348896		33.2	0.0548	0.06	0.0594	0.048	0.0357	0.0391	0.037	0.0332		0.00296667	0.0100854	-0.00500208	0.00966667	0.00200208	0.0161688	0.00405417	0.00168958		8.80111e-06	0.000101716	2.50208e-05	9.34444e-05	4.00834e-06	0.000261428	1.64363e-05	2.85469e-06
33.4	0.0577167	0.0669854	0.0570479	0.0603667	0.0359521	0.0546188	0.0397542	0.0369896		33.4	0.0545	0.0598	0.0597	0.048	0.0352	0.0392	0.0378	0.0335		0.00321667	0.00718542	-0.00265208	0.0123667	0.000752083	0.0154188	0.00195417	0.00348958		1.03469e-05	5.16302e-05	7.03355e-06	0.000152934	5.65629e-07	0.000237738	3.81877e-06	1.21772e-05
33.6	0.0571667	0.0649854	0.0587979	0.0578167	0.0356521	0.0526187	0.0387042	0.0341896		33.6	0.0542	0.0595	0.06	0.0479	0.035	0.0395	0.0382	0.0333		0.00296667	0.00548542	-0.00120208	0.00991667	0.000652083	0.0131187	0.000504167	0.000889583		8.80111e-06	3.00898e-05	1.445e-06	9.83403e-05	4.25213e-07	0.000172102	2.54184e-07	7.91359e-07
33.8	0.0573167	0.0660354	0.0570479	0.0563667	0.0376021	0.0510187	0.0373542	0.0324396		33.8	0.054	0.0592	0.06	0.0476	0.0352	0.0398	0.0381	0.0331		0.00331667	0.00683542	-0.00295208	0.00876667	0.00240208	0.0112187	-0.000745833	-0.000660417		1.10003e-05	4.67229e-05	8.7148e-06	7.68544e-05	5.77e-06	0.00012586	5.56267e-07	4.3615e-07
34	0.0546167	0.0653854	0.0541979	0.0603167	0.0393521	0.0465188	0.0401542	0.0356896		34	0.0538	0.0588	0.0595	0.0476	0.0358	0.0402	0.0378	0.0329		0.000816667	0.00658542	-0.00530208	0.0127167	0.00355208	0.00631875	0.00235417	0.00278958		6.66944e-07	4.33677e-05	2.81121e-05	0.000161714	1.26173e-05	3.99266e-05	5.5421e-06	7.78178e-06
34.2	0.0558667	0.0723854	0.0521979	0.0619667	0.0393521	0.0513687	0.0364542	0.0340896		34.2	0.0537	0.0584	0.0588	0.0477	0.0365	0.0403	0.0374	0.0324		0.00216667	0.0139854	-0.00660208	0.0142667	0.00285208	0.0110687	-0.000945833	0.00168958		4.69444e-06	0.000195592	4.35875e-05	0.000203538	8.13438e-06	0.000122517	8.94601e-07	2.85469e-06
34.4	0.0581167	0.0708354	0.0542979	0.0577167	0.0372021	0.0496188	0.0372042	0.0303396		34.4	0.0535	0.058	0.0581	0.0476	0.0369	0.0402	0.0367	0.0317		0.00461667	0.0128354	-0.00380208	0.0101167	0.000302083	0.00941875	0.000504167	-0.00136042		2.13136e-05	0.000164748	1.44558e-05	0.000102347	9.12543e-08	8.87129e-05	2.54184e-07	1.85073e-06
34.6	0.0549667	0.0662854	0.0550979	0.0546167	0.0363521	0.0571687	0.0372542	0.0302896		34.6	0.0532	0.0576	0.0576	0.0473	0.0367	0.0402	0.0362	0.0312		0.00176667	0.00868542	-0.00250208	0.00731667	-0.000347917	0.0169687	0.00105417	-0.000910417		3.12111e-06	7.54365e-05	6.26042e-06	5.35336e-05	1.21046e-07	0.000287938	1.11127e-06	8.28859e-07
34.8	0.0587667	0.0677354	0.0606979	0.0538667	0.0366521	0.0539687	0.0373042	0.0276396		34.8	0.0528	0.0572	0.0574	0.047	0.036	0.0403	0.0356	0.0311		0.00596667	0.0105354	0.00329792	0.00686667	0.000652083	0.0136687	0.00170417	-0.00346042		3.56011e-05	0.000110995	1.08763e-05	4.71511e-05	4.25213e-07	0.000186835	2.90418e-06	1.19745e-05
35	0.0525667	0.0680354	0.0584479	0.0546667	0.0364021	0.0535687	0.0358042	0.0303396		35	0.0523	0.0569	0.0575	0.0467	0.0352	0.0402	0.0352	0.0313		0.000266667	0.0111354	0.000947917	0.00796667	0.00120208	0.0133687	0.000604167	-0.000960417		7.11111e-08	0.000123998	8.98546e-07	6.34678e-05	1.445e-06	0.000178723	3.65017e-07	9.224e-07
35.2	0.0547667	0.0668354	0.0536979	0.0588167	0.0374521	0.0498688	0.0393542	0.0325896		35.2	0.0518	0.0567	0.0579	0.0463	0.0344	0.0397	0.0349	0.0315		0.00296667	0.0101354	-0.00420208	0.0125167	0.00305208	0.0101688	0.00445417	0.00108958		8.80111e-06	0.000102727	1.76575e-05	0.000156667	9.31521e-06	0.000103403	1.98396e-05	1.18719e-06
35.4	0.0564167	0.0687854	0.0534479	0.0579667	0.0340021	0.0552187	0.0355542	0.0352396		35.4	0.0515	0.0566	0.0579	0.0458	0.0339	0.0389	0.0348	0.0314		0.00491667	0.0121854	-0.00445208	0.0121667	0.000102083	0.0163187	0.000754167	0.00383958		2.41736e-05	0.000148484	1.9821e-05	0.000148028	1.0421e-08	0.000266302	5.68767e-07	1.47424e-05
35.6	0.0527167	0.0662354	0.0529979	0.0529167	0.0330521	0.0562188	0.0375542	0.0296396		35.6	0.0513	0.0565	0.0576	0.0454	0.0338	0.0381	0.0349	0.0312		0.00141667	0.00973542	-0.00460208	0.00751667	-0.000747917	0.0181188	0.00265417	-0.00156042		2.00694e-06	9.47783e-05	2.11792e-05	5.65003e-05	5.59379e-07	0.000328289	7.0446e-06	2.4349e-06
35.8	0.0567167	0.0620854	0.0509479	0.0524167	0.0355521	0.0565688	0.0366042	0.0244396		35.8	0.0513	0.0565	0.057	0.0452	0.0339	0.0374	0.035	0.0315		0.00541667	0.00558542	-0.00605208	0.00721667	0.00165208	0.0191687	0.00160417	-0.00706042		2.93403e-05	3.11969e-05	3.66277e-05	5.20803e-05	2.72938e-06	0.000367441	2.57335e-06	4.98495e-05
36	0.0542667	0.0617354	0.0542479	0.0513167	0.0378021	0.0554687	0.0364542	0.0254396		36	0.0513	0.0565	0.0564	0.0451	0.034	0.037	0.0348	0.032		0.00296667	0.00523542	-0.00215208	0.00621667	0.00380208	0.0184687	0.00165417	-0.00656042		8.80111e-06	2.74096e-05	4.63146e-06	3.86469e-05	1.44558e-05	0.000341095	2.73627e-06	4.30391e-05
36.2	0.0558667	0.0643354	0.0569479	0.0534167	0.0358521	0.0504687	0.0375042	0.0283396		36.2	0.0514	0.0564	0.0558	0.045	0.0338	0.0369	0.0344	0.0319		0.00446667	0.00793542	0.00114792	0.00841667	0.00205208	0.0135687	0.00310417	-0.00356042		1.99511e-05	6.29708e-05	1.31771e-06	7.08403e-05	4.21105e-06	0.000184111	9.63585e-06	1.26766e-05
36.4	0.0530667	0.0669854	0.0568979	0.0518667	0.0348521	0.0501187	0.0398542	0.0315896		36.4	0.0513	0.0562	0.0555	0.0449	0.0332	0.0373	0.0343	0.031		0.00176667	0.0107854	0.00139792	0.00696667	0.00165208	0.0128187	0.00555417	0.000589583		3.12111e-06	0.000116325	1.95417e-06	4.85344e-05	2.72938e-06	0.00016432	3.08488e-05	3.47609e-07
36.6	0.0568667	0.0668854	0.0541479	0.0556667	0.0346521	0.0509187	0.0364042	0.0254396		36.6	0.051	0.056	0.0555	0.0449	0.0326	0.0378	0.0345	0.0302		0.00586667	0.0108854	-0.00135208	0.0107667	0.00205208	0.0131187	0.00190417	-0.00476042		3.44178e-05	0.000118492	1.82813e-06	0.000115921	4.21105e-06	0.000172102	3.62585e-06	2.26616e-05
36.8	0.0539167	0.0713854	0.0521479	0.0587167	0.0380521	0.0509187	0.0338542	0.0275896		36.8	0.0507	0.0557	0.0558	0.0449	0.0321	0.0381	0.0347	0.0298		0.00321667	0.0156854	-0.00365208	0.0138167	0.00595208	0.0128187	-0.000845833	-0.00221042		1.03469e-05	0.000246032	1.33377e-05	0.0001909	3.54273e-05	0.00016432	7.15434e-07	4.88594e-06
37	0.0539167	0.0739354	0.0506479	0.0602167	0.0343521	0.0537688	0.0335042	0.0255396		37	0.0504	0.0555	0.056	0.0447	0.0321	0.038	0.0349	0.0297		0.00351667	0.0184354	-0.00535208	0.0155167	0.00225208	0.0157688	-0.00139583	-0.00416042		1.23669e-05	0.000339865	2.86448e-05	0.000240767	5.07188e-06	0.000248653	1.94835e-06	1.73091e-05
37.2	0.0547167	0.0644854	0.0527979	0.0519167	0.0375521	0.0535687	0.0364542	0.0217396		37.2	0.0502	0.0553	0.0559	0.0445	0.0326	0.0376	0.0352	0.0295		0.00451667	0.00918542	-0.00310208	0.00741667	0.00495208	0.0159687	0.00125417	-0.00776042		2.04003e-05	8.43719e-05	9.62292e-06	5.50069e-05	2.45231e-05	0.000255001	1.57293e-06	6.02241e-05
37.4	0.0527167	0.0634354	0.0536479	0.0511167	0.0378021	0.0498187	0.0351042	0.0234396		37.4	0.0501	0.0552	0.0556	0.0444	0.0335	0.0372	0.0352	0.0294		0.00261667	0.00823542	-0.00195208	0.00671667	0.00430208	0.0126187	-9.58333e-05	-0.00596042		6.84694e-06	6.78221e-05	3.81063e-06	4.51136e-05	1.85079e-05	0.000159233	9.18403e-09	3.55266e-05
37.6	0.0557167	0.0647854	0.0544979	0.0549167	0.0357521	0.0484187	0.0374542	0.0270396		37.6	0.0501	0.0552	0.0551	0.0443	0.0341	0.0368	0.0344	0.0293		0.00561667	0.00958542	-0.000602083	0.0106167	0.00165208	0.0116187	0.00305417	-0.00226042		3.15469e-05	9.18802e-05	3.62504e-07	0.000112714	2.72938e-06	0.000134995	9.32793e-06	5.10948e-06
37.8	0.0509167	0.0640854	0.0552479	0.0497667	0.0358521	0.0496188	0.0373042	0.0269896		37.8	0.0502	0.0552	0.0548	0.0441	0.0341	0.0367	0.0333	0.0291		0.000716667	0.00888542	0.000447917	0.00566667	0.00175208	0.0129187	0.00400417	-0.00211042		5.13611e-07	7.89506e-05	2.00629e-07	3.21111e-05	3.0698e-06	0.000166894	1.60334e-05	4.45386e-06
38	0.0524667	0.0633854	0.0547479	0.0492167	0.0367021	0.0481687	0.0359042	0.0209396		38	0.0503	0.0552	0.0546	0.0438	0.0335	0.037	0.0325	0.0291		0.00216667	0.00818542	0.000147917	0.00541667	0.00320208	0.0111687	0.00340417	-0.00816042		4.69444e-06	6.7001e-05	2.18793e-08	2.93403e-05	1.02533e-05	0.000124741	1.15884e-05	6.65924e-05
38.2	0.0527667	0.0640854	0.0518979	0.0546167	0.0353021	0.0529188	0.0346042	0.0254896		38.2	0.0503	0.0552	0.0547	0.0436	0.0326	0.0372	0.0323	0.029		0.00246667	0.00888542	-0.00280208	0.0110167	0.00270208	0.0157188	0.00230417	-0.00351042		6.08444e-06	7.89506e-05	7.85167e-06	0.000121367	7.30125e-06	0.000247079	5.30918e-06	1.2323e-05
38.4	0.0523167	0.0633854	0.0513479	0.0557667	0.0336021	0.0586688	0.0350542	0.0232896		38.4	0.0501	0.0551	0.055	0.0435	0.0316	0.0372	0.0324	0.0284		0.00221667	0.00828542	-0.00365208	0.0122667	0.00200208	0.0214688	0.00265417	-0.00511042		4.91361e-06	6.86481e-05	1.33377e-05	0.000150471	4.00834e-06	0.000460907	7.0446e-06	2.61164e-05
38.6	0.0507667	0.0632854	0.0546979	0.0540167	0.0367021	0.0535187	0.0349042	0.0210896		38.6	0.0499	0.0551	0.0554	0.0434	0.0309	0.0369	0.0325	0.0274		0.000866667	0.00818542	-0.000702083	0.0106167	0.00580208	0.0166187	0.00240417	-0.00631042		7.51111e-07	6.7001e-05	4.92921e-07	0.000112714	3.36642e-05	0.000276183	5.78002e-06	3.98214e-05
38.8	0.0536667	0.0597354	0.0541479	0.0506667	0.0377021	0.0522188	0.0353542	0.0226896		38.8	0.0497	0.0549	0.0556	0.0432	0.0308	0.0363	0.0326	0.0271		0.00396667	0.00483542	-0.00145208	0.00746667	0.00690208	0.0159188	0.00275417	-0.00441042		1.57344e-05	2.33813e-05	2.10855e-06	5.57511e-05	4.76388e-05	0.000253407	7.58543e-06	1.94518e-05
39	0.0515167	0.0601354	0.0533479	0.0522667	0.0410021	0.0472687	0.0370542	0.0237896		39	0.0495	0.0547	0.0554	0.0431	0.0314	0.0354	0.0329	0.0275		0.00201667	0.00543542	-0.00205208	0.00916667	0.00960208	0.0118687	0.00415417	-0.00371042		4.06694e-06	2.95438e-05	4.21105e-06	8.40278e-05	9.22e-05	0.000140867	1.72571e-05	1.37672e-05
39.2	0.0511667	0.0614854	0.0527479	0.0542667	0.0388021	0.0455187	0.0356542	0.0248396		39.2	0.0494	0.0545	0.0549	0.0432	0.032	0.0348	0.033	0.0282		0.00176667	0.00698542	-0.00215208	0.0110667	0.00680208	0.0107187	0.00265417	-0.00336042		3.12111e-06	4.8796e-05	4.63146e-06	0.000122471	4.62683e-05	0.000114892	7.0446e-06	1.12924e-05
39.4	0.0523667	0.0606354	0.0498979	0.0531667	0.0400521	0.0488188	0.0363042	0.0243396		39.4	0.0493	0.0542	0.0543	0.0433	0.0324	0.0346	0.0328	0.0288		0.00306667	0.00643542	-0.00440208	0.00986667	0.00765208	0.0142188	0.00350417	-0.00446042		9.40444e-06	4.14146e-05	1.93783e-05	9.73511e-05	5.85544e-05	0.000202173	1.22792e-05	1.98953e-05
39.6	0.0496667	0.0642354	0.0498479	0.0522167	0.0399021	0.0496188	0.0335542	0.0263396		39.6	0.0492	0.054	0.0539	0.0432	0.0322	0.0348	0.0325	0.0289		0.000466667	0.0102354	-0.00405208	0.00901667	0.00770208	0.0148188	0.00105417	-0.00256042		2.17778e-07	0.000104764	1.64194e-05	8.13003e-05	5.93221e-05	0.000219595	1.11127e-06	6.55573e-06
39.8	0.0513167	0.0607354	0.0511979	0.0508167	0.0341021	0.0511688	0.0362042	0.0209396		39.8	0.049	0.0539	0.0536	0.043	0.0316	0.0351	0.0324	0.0288		0.00231667	0.00683542	-0.00240208	0.00781667	0.00250208	0.0160688	0.00380417	-0.00786042		5.36694e-06	4.67229e-05	5.77e-06	6.11003e-05	6.26042e-06	0.000258205	1.44717e-05	6.17862e-05
40	0.0514667	0.0613354	0.0508479	0.0491667	0.0319521	0.0497187	0.0341042	0.0161896		40	0.0487	0.0538	0.0535	0.0429	0.0308	0.0355	0.0327	0.0286		0.00276667	0.00753542	-0.00265208	0.00626667	0.00115208	0.0142188	0.00140417	-0.0124104		7.65444e-06	5.67825e-05	7.03355e-06	3.92711e-05	1.3273e-06	0.000202173	1.97168e-06	0.000154018
40.2	0.0516167	0.0638854	0.0548979	0.0514667	0.0337021	0.0514687	0.0356542	0.0194396		40.2	0.0485	0.0537	0.0537	0.0427	0.0302	0.0358	0.033	0.0283		0.00311667	0.0101854	0.00119792	0.00876667	0.00350208	0.0156687	0.00265417	-0.00886042		9.71361e-06	0.000103743	1.435e-06	7.68544e-05	1.22646e-05	0.00024551	7.0446e-06	7.8507e-05
40.4	0.0500167	0.0619354	0.0530979	0.0472167	0.0349021	0.0506187	0.0347042	0.0230396		40.4	0.0483	0.0537	0.054	0.0423	0.0302	0.0357	0.033	0.0277		0.00171667	0.00823542	-0.000902083	0.00491667	0.00470208	0.0149187	0.00170417	-0.00466042		2.94694e-06	6.78221e-05	8.13754e-07	2.41736e-05	2.21096e-05	0.000222569	2.90418e-06	2.17195e-05
40.6	0.0525667	0.0586854	0.0500479	0.0491667	0.0356021	0.0492187	0.0338042	0.0228896		40.6	0.0483	0.0537	0.054	0.042	0.0307	0.0354	0.0329	0.0266		0.00426667	0.00498542	-0.00395208	0.00716667	0.00490208	0.0138187	0.000904167	-0.00371042		1.82044e-05	2.48544e-05	1.5619e-05	5.13611e-05	2.40304e-05	0.000190958	8.17517e-07	1.37672e-05
40.8	0.0500667	0.0615854	0.0500979	0.0503667	0.0396521	0.0505188	0.0365542	0.0233396		40.8	0.0483	0.0536	0.0538	0.0418	0.0316	0.0351	0.0325	0.0258		0.00176667	0.00798542	-0.00370208	0.00856667	0.00805208	0.0154188	0.00405417	-0.00246042		3.12111e-06	6.37669e-05	1.37054e-05	7.33878e-05	6.4836e-05	0.000237738	1.64363e-05	6.05365e-06
41	0.0474667	0.0620354	0.0482479	0.0535667	0.0396021	0.0498187	0.0324542	0.0205396		41	0.0484	0.0536	0.0536	0.0418	0.0321	0.035	0.0316	0.0257		-0.000933333	0.00843542	-0.00535208	0.0117667	0.00750208	0.0148187	0.000854167	-0.00516042		8.71111e-07	7.11563e-05	2.86448e-05	0.000138454	5.62813e-05	0.000219595	7.29601e-07	2.66299e-05
41.2	0.0491667	0.0624854	0.0489479	0.0510167	0.0356021	0.0484687	0.0336042	0.0209396		41.2	0.0485	0.0535	0.0533	0.0418	0.032	0.035	0.0307	0.0259		0.000666667	0.00898542	-0.00435208	0.00921667	0.00360208	0.0134687	0.00290417	-0.00496042		4.44444e-07	8.07377e-05	1.89406e-05	8.49469e-05	1.2975e-05	0.000181407	8.43418e-06	2.46057e-05
41.4	0.0495667	0.0601854	0.0536479	0.0478167	0.0333021	0.0486188	0.0346042	0.0224896		41.4	0.0485	0.0534	0.0531	0.0418	0.0315	0.0351	0.0302	0.0263		0.00106667	0.00678542	0.000547917	0.00601667	0.00180208	0.0135188	0.00440417	-0.00381042		1.13778e-06	4.60419e-05	3.00213e-07	3.62003e-05	3.2475e-06	0.000182757	1.93967e-05	1.45193e-05
41.6	0.0491167	0.0574354	0.0567979	0.0475667	0.0323021	0.0492187	0.0352042	0.0230396		41.6	0.0484	0.0531	0.0531	0.0418	0.0307	0.0352	0.0301	0.0265		0.000716667	0.00433542	0.00369792	0.00576667	0.00160208	0.0140187	0.00510417	-0.00346042		5.13611e-07	1.87958e-05	1.36746e-05	3.32544e-05	2.56667e-06	0.000196525	2.60525e-05	1.19745e-05
41.8	0.0508167	0.0609854	0.0536979	0.0461167	0.0309021	0.0466188	0.0322042	0.0225396		41.8	0.0481	0.0528	0.0532	0.0418	0.03	0.0351	0.0305	0.0264		0.00271667	0.00818542	0.000497917	0.00431667	0.000902083	0.0115188	0.00170417	-0.00386042		7.38028e-06	6.7001e-05	2.47921e-07	1.86336e-05	8.13754e-07	0.000132682	2.90418e-06	1.49028e-05
42	0.0461167	0.0654854	0.0499979	0.0503667	0.0329521	0.0464687	0.0340042	0.0239896		42	0.0477	0.0524	0.0533	0.0417	0.0296	0.0346	0.0308	0.0259		-0.00158333	0.0130854	-0.00330208	0.00866667	0.00335208	0.0118687	0.00320417	-0.00191042		2.50694e-06	0.000171228	1.09038e-05	7.51111e-05	1.12365e-05	0.000140867	1.02667e-05	3.64969e-06
42.2	0.0492167	0.0600354	0.0473479	0.0510667	0.0327521	0.0484187	0.0316042	0.0216896		42.2	0.0473	0.0519	0.0532	0.0415	0.0296	0.0339	0.031	0.0255		0.00191667	0.00813542	-0.00585208	0.00956667	0.00315208	0.0145187	0.000604167	-0.00381042		3.67361e-06	6.6185e-05	3.42469e-05	9.15211e-05	9.93563e-06	0.000210794	3.65017e-07	1.45193e-05
42.4	0.0502167	0.0588854	0.0480479	0.0492667	0.0364521	0.0469688	0.0338042	0.0184396		42.4	0.047	0.0515	0.0529	0.0413	0.03	0.0333	0.0313	0.0255		0.00321667	0.00738542	-0.00485208	0.00796667	0.00645208	0.0136688	0.00250417	-0.00706042		1.03469e-05	5.45444e-05	2.35427e-05	6.34678e-05	4.16294e-05	0.000186835	6.27085e-06	4.98495e-05
42.6	0.0497667	0.0568354	0.0492479	0.0487167	0.0358521	0.0485687	0.0339542	0.0228896		42.6	0.0467	0.0513	0.0523	0.0412	0.0303	0.0327	0.0314	0.0255		0.00306667	0.00553542	-0.00305208	0.00751667	0.00555208	0.0158687	0.00255417	-0.00261042		9.40444e-06	3.06408e-05	9.31521e-06	5.65003e-05	3.08256e-05	0.000251817	6.52377e-06	6.81428e-06
42.8	0.0511167	0.0616854	0.0538479	0.0515667	0.0358021	0.0486188	0.0339042	0.0219396		42.8	0.0465	0.0514	0.0517	0.0411	0.0304	0.0326	0.0314	0.0252		0.00461667	0.0102854	0.00214792	0.0104667	0.00540208	0.0160188	0.00250417	-0.00326042		2.13136e-05	0.00010579	4.61355e-06	0.000109551	2.91825e-05	0.0002566	6.27085e-06	1.06303e-05
43	0.0486667	0.0611854	0.0545979	0.0479667	0.0331521	0.0484687	0.0351542	0.0202396		43	0.0466	0.0514	0.0512	0.0409	0.0301	0.0329	0.0313	0.0252		0.00206667	0.00978542	0.00339792	0.00706667	0.00305208	0.0155687	0.00385417	-0.00496042		4.27111e-06	9.57544e-05	1.15458e-05	4.99378e-05	9.31521e-06	0.000242386	1.48546e-05	2.46057e-05
43.2	0.0487167	0.0564354	0.0529479	0.0451167	0.0282021	0.0486188	0.0323542	0.0176396		43.2	0.0467	0.0516	0.0511	0.0405	0.0296	0.0335	0.0312	0.0256		0.00201667	0.00483542	0.00184792	0.00461667	-0.00139792	0.0151188	0.00115417	-0.00796042		4.06694e-06	2.33813e-05	3.4148e-06	2.13136e-05	1.95417e-06	0.000228577	1.3321e-06	6.33682e-05
43.4	0.0486667	0.0545354	0.0502979	0.0466667	0.0297021	0.0494187	0.0319042	0.0219396		43.4	0.0468	0.0519	0.0512	0.0404	0.029	0.034	0.0312	0.0259		0.00186667	0.00263542	-0.000902083	0.00626667	0.000702083	0.0154187	0.000704167	-0.00396042		3.48444e-06	6.94542e-06	8.13754e-07	3.92711e-05	4.92921e-07	0.000237738	4.95851e-07	1.56849e-05
43.6	0.0471667	0.0606354	0.0493979	0.0506167	0.0282021	0.0519187	0.0305542	0.0158396		43.6	0.0468	0.052	0.0516	0.0402	0.0287	0.0345	0.0312	0.0259		0.000366667	0.00863542	-0.00220208	0.0104167	-0.000497917	0.0174187	-0.000645833	-0.0100604		1.34444e-07	7.45704e-05	4.84917e-06	0.000108507	2.47921e-07	0.000303413	4.17101e-07	0.000101212
43.8	0.0487167	0.0608354	0.0486979	0.0517667	0.0323521	0.0511688	0.0320042	0.0142396		43.8	0.0469	0.0519	0.0521	0.0401	0.0288	0.0345	0.0307	0.0256		0.00181667	0.00893542	-0.00340208	0.0116667	0.00355208	0.0166688	0.00130417	-0.0113604		3.30028e-06	7.98417e-05	1.15742e-05	0.000136111	1.26173e-05	0.000277847	1.70085e-06	0.000129059
44	0.0474667	0.0632854	0.0486479	0.0509167	0.0320521	0.0516687	0.0323542	0.0149396		44	0.0468	0.0517	0.0525	0.0401	0.0293	0.0343	0.0301	0.025		0.000666667	0.0115854	-0.00385208	0.0108167	0.00275208	0.0173688	0.00225417	-0.0100604		4.44444e-07	0.000134222	1.48385e-05	0.000117	7.57396e-06	0.000301673	5.08127e-06	0.000101212
44.2	0.0462667	0.0571354	0.0513979	0.0485167	0.0323521	0.0442188	0.0332042	0.0208396		44.2	0.0467	0.0515	0.0524	0.0402	0.0298	0.0339	0.0295	0.0244		-0.000433333	0.00563542	-0.00100208	0.00831667	0.00255208	0.0103188	0.00370417	-0.00356042		1.87778e-07	3.17579e-05	1.00417e-06	6.91669e-05	6.51313e-06	0.000106477	1.37209e-05	1.26766e-05
44.4	0.0489167	0.0582854	0.0550479	0.0455167	0.0322521	0.0480187	0.0342042	0.0194396		44.4	0.0465	0.0514	0.0521	0.0405	0.0301	0.0336	0.0293	0.024		0.00241667	0.00688542	0.00294792	0.00501667	0.00215208	0.0144188	0.00490417	-0.00456042		5.84028e-06	4.7409e-05	8.69021e-06	2.51669e-05	4.63146e-06	0.0002079	2.40509e-05	2.07974e-05
44.6	0.0473167	0.0603354	0.0536979	0.0480167	0.0297021	0.0477187	0.0313042	0.0218896		44.6	0.0464	0.0511	0.0518	0.0407	0.03	0.0334	0.0292	0.0242		0.000916667	0.00923542	0.00189792	0.00731667	-0.000297917	0.0143187	0.00210417	-0.00231042		8.40278e-07	8.52929e-05	3.60209e-06	5.35336e-05	8.87543e-08	0.000205027	4.42752e-06	5.33803e-06
44.8	0.0470667	0.0546854	0.0506979	0.0452667	0.0293021	0.0472187	0.0302542	0.0223396		44.8	0.0463	0.0508	0.0515	0.0406	0.0297	0.0332	0.0293	0.0246		0.000766667	0.00388542	-0.000802083	0.00466667	-0.000397917	0.0140187	0.000954167	-0.00226042		5.87778e-07	1.50965e-05	6.43338e-07	2.17778e-05	1.58338e-07	0.000196525	9.10434e-07	5.10948e-06
45	0.0442667	0.0542854	0.0481979	0.0458167	0.0318021	0.0516188	0.0330042	0.0185896		45	0.0461	0.0505	0.0512	0.0404	0.0292	0.0331	0.0294	0.0248		-0.00183333	0.00378542	-0.00300208	0.00541667	0.00260208	0.0185188	0.00360417	-0.00621042		3.36111e-06	1.43294e-05	9.0125e-06	2.93403e-05	6.77084e-06	0.000342944	1.299e-05	3.85693e-05
45.2	0.0480167	0.0544854	0.0464479	0.0513667	0.0287521	0.0550687	0.0305042	0.0159396		45.2	0.0458	0.05	0.0509	0.0403	0.0289	0.0329	0.0298	0.0251		0.00221667	0.00448542	-0.00445208	0.0110667	-0.000147917	0.0221688	0.000704167	-0.00916042		4.91361e-06	2.0119e-05	1.9821e-05	0.000122471	2.18793e-08	0.000491453	4.95851e-07	8.39132e-05
45.4	0.0466167	0.0588854	0.0435979	0.0476167	0.0315521	0.0476188	0.0309542	0.0149396		45.4	0.0455	0.0496	0.0508	0.04	0.0286	0.0327	0.0302	0.0253		0.00111667	0.00928542	-0.00720208	0.00761667	0.00295208	0.0149188	0.000754167	-0.0103604		1.24694e-06	8.6219e-05	5.187e-05	5.80136e-05	8.7148e-06	0.000222569	5.68767e-07	0.000107338
45.6	0.0469167	0.0564354	0.0459979	0.0446667	0.0308521	0.0453188	0.0321542	0.0156896		45.6	0.0451	0.0492	0.0507	0.0397	0.0284	0.0324	0.0302	0.0254		0.00181667	0.00723542	-0.00470208	0.00496667	0.00245208	0.0129188	0.00195417	-0.00971042		3.30028e-06	5.23513e-05	2.21096e-05	2.46678e-05	6.01271e-06	0.000166894	3.81877e-06	9.42922e-05
45.8	0.0459667	0.0557854	0.0481479	0.0468167	0.0312021	0.0472187	0.0306042	0.0188896		45.8	0.0448	0.049	0.0505	0.0393	0.0284	0.032	0.0301	0.0252		0.00116667	0.00678542	-0.00235208	0.00751667	0.00280208	0.0152187	0.000504167	-0.00631042		1.36111e-06	4.60419e-05	5.5323e-06	5.65003e-05	7.85167e-06	0.00023161	2.54184e-07	3.98214e-05
46	0.0469667	0.0532354	0.0488979	0.0426667	0.0293521	0.0440688	0.0288542	0.0206396		46	0.0446	0.0488	0.0501	0.0391	0.0284	0.0318	0.03	0.0249		0.00236667	0.00443542	-0.00120208	0.00356667	0.000952083	0.0122688	-0.00114583	-0.00426042		5.60111e-06	1.96729e-05	1.445e-06	1.27211e-05	9.06463e-07	0.000150522	1.31293e-06	1.81512e-05
46.2	0.0454167	0.0582854	0.0491979	0.0458667	0.0312021	0.0437688	0.0324042	0.0207396		46.2	0.0445	0.0486	0.0496	0.0389	0.0284	0.0317	0.0298	0.0245		0.000916667	0.00968542	-0.000402083	0.00696667	0.00280208	0.0120688	0.00260417	-0.00376042		8.40278e-07	9.38073e-05	1.61671e-07	4.85344e-05	7.85167e-06	0.000145655	6.78168e-06	1.41407e-05
46.4	0.0457667	0.0601354	0.0470479	0.0495167	0.0311521	0.0453687	0.0311042	0.0195896		46.4	0.0444	0.0484	0.0492	0.0388	0.0283	0.0318	0.0295	0.0244		0.00136667	0.0117354	-0.00215208	0.0107167	0.00285208	0.0135687	0.00160417	-0.00481042		1.86778e-06	0.00013772	4.63146e-06	0.000114847	8.13438e-06	0.000184111	2.57335e-06	2.31401e-05
46.6	0.0445167	0.0635854	0.0462479	0.0517667	0.0315521	0.0498688	0.0314042	0.0152396		46.6	0.0442	0.0482	0.0489	0.0386	0.0281	0.032	0.0293	0.0244		0.000316667	0.0153854	-0.00265208	0.0131667	0.00345208	0.0178688	0.00210417	-0.00916042		1.00278e-07	0.000236711	7.03355e-06	0.000173361	1.19169e-05	0.000319292	4.42752e-06	8.39132e-05
46.8	0.0447667	0.0577854	0.0492979	0.0481667	0.0323521	0.0498688	0.0301042	0.0202896		46.8	0.0441	0.048	0.0487	0.0385	0.0278	0.0325	0.0293	0.0244		0.000666667	0.00978542	0.000597917	0.00966667	0.00455208	0.0173688	0.000804167	-0.00411042		4.44444e-07	9.57544e-05	3.57504e-07	9.34444e-05	2.07215e-05	0.000301673	6.46684e-07	1.68955e-05
47	0.0454167	0.0538854	0.0500479	0.0451667	0.0326021	0.0425188	0.0302542	0.0167896		47	0.0439	0.0479	0.0487	0.0385	0.0274	0.0329	0.0292	0.0242		0.00151667	0.00598542	0.00134792	0.00666667	0.00520208	0.00961875	0.00105417	-0.00741042		2.30028e-06	3.58252e-05	1.81688e-06	4.44444e-05	2.70617e-05	9.25204e-05	1.11127e-06	5.49143e-05
47.2	0.0453667	0.0543854	0.0521979	0.0430167	0.0313521	0.0472187	0.0292542	0.0183896		47.2	0.0437	0.0478	0.0489	0.0384	0.0273	0.0331	0.029	0.0237		0.00166667	0.00658542	0.00329792	0.00461667	0.00405208	0.0141187	0.000254167	-0.00531042		2.77778e-06	4.33677e-05	1.08763e-05	2.13136e-05	1.64194e-05	0.000199339	6.46007e-08	2.82005e-05
47.4	0.0446167	0.0580354	0.0483979	0.0433667	0.0291521	0.0466688	0.0312042	0.0172896		47.4	0.0434	0.0477	0.0491	0.0383	0.0272	0.033	0.0286	0.0235		0.00121667	0.0103354	-0.000702083	0.00506667	0.00195208	0.0136688	0.00260417	-0.00621042		1.48028e-06	0.000106821	4.92921e-07	2.56711e-05	3.81063e-06	0.000186835	6.78168e-06	3.85693e-05
47.6	0.0471667	0.0541354	0.0495979	0.0429167	0.0277021	0.0428688	0.0286542	0.0190396		47.6	0.0432	0.0477	0.0491	0.0382	0.0273	0.0327	0.0281	0.0234		0.00396667	0.00643542	0.000497917	0.00471667	0.000402083	0.0101688	0.000554167	-0.00436042		1.57344e-05	4.14146e-05	2.47921e-07	2.22469e-05	1.61671e-07	0.000103403	3.07101e-07	1.90132e-05
47.8	0.0441667	0.0531854	0.0500979	0.0461667	0.0298021	0.0451187	0.0299542	0.0162896		47.8	0.043	0.0476	0.049	0.0382	0.0274	0.0322	0.028	0.0231		0.00116667	0.00558542	0.00109792	0.00796667	0.00240208	0.0129187	0.00195417	-0.00681042		1.36111e-06	3.11969e-05	1.20542e-06	6.34678e-05	5.77e-06	0.000166894	3.81877e-06	4.63818e-05
48	0.0420667	0.0557854	0.0460979	0.0499167	0.0307521	0.0452688	0.0325042	0.0141896		48	0.0429	0.0476	0.0487	0.0382	0.0274	0.0317	0.0281	0.0229		-0.000833333	0.00818542	-0.00260208	0.0117167	0.00335208	0.0135688	0.00440417	-0.00871042		6.94444e-07	6.7001e-05	6.77084e-06	0.00013728	1.12365e-05	0.000184111	1.93967e-05	7.58714e-05
48.2	0.0442167	0.0531854	0.0495979	0.0557667	0.0311021	0.0454188	0.0299542	0.0140896		48.2	0.0429	0.0475	0.0484	0.0381	0.0275	0.0313	0.0282	0.0232		0.00131667	0.00568542	0.00119792	0.0176667	0.00360208	0.0141187	0.00175417	-0.00911042		1.73361e-06	3.2324e-05	1.435e-06	0.000312111	1.2975e-05	0.000199339	3.0771e-06	8.29997e-05
48.4	0.0448667	0.0542354	0.0490479	0.0502667	0.0312021	0.0424188	0.0294542	0.0126396		48.4	0.043	0.0474	0.0481	0.038	0.0274	0.0311	0.0282	0.0236		0.00186667	0.00683542	0.000947917	0.0122667	0.00380208	0.0113188	0.00125417	-0.0109604		3.48444e-06	4.67229e-05	8.98546e-07	0.000150471	1.44558e-05	0.000128114	1.57293e-06	0.000120131
48.6	0.0439667	0.0573354	0.0494479	0.0431167	0.0293021	0.0422187	0.0279542	0.0168396		48.6	0.043	0.0473	0.0479	0.0378	0.0271	0.031	0.0282	0.0238		0.000966667	0.0100354	0.00154792	0.00531667	0.00220208	0.0112187	-0.000245833	-0.00696042		9.34444e-07	0.00010071	2.39605e-06	2.82669e-05	4.84917e-06	0.00012586	6.0434e-08	4.84474e-05
48.8	0.0428167	0.0577854	0.0508479	0.0435167	0.0313521	0.0459188	0.0317042	0.0173396		48.8	0.0429	0.0472	0.0478	0.0377	0.0268	0.0311	0.0284	0.0239		-8.33333e-05	0.0105854	0.00304792	0.00581667	0.00455208	0.0148188	0.00330417	-0.00656042		6.94444e-09	0.000112051	9.2898e-06	3.38336e-05	2.07215e-05	0.000219595	1.09175e-05	4.30391e-05
49	0.0457167	0.0561354	0.0506979	0.0438167	0.0310521	0.0464187	0.0285042	0.0205396		49	0.0428	0.047	0.0479	0.0376	0.0264	0.0312	0.0286	0.0239		0.00291667	0.00913542	0.00279792	0.00621667	0.00465208	0.0152187	-9.58333e-05	-0.00336042		8.50694e-06	8.34558e-05	7.82834e-06	3.86469e-05	2.16419e-05	0.00023161	9.18403e-09	1.12924e-05
49.2	0.0452667	0.0569854	0.0489479	0.0462167	0.0298021	0.0444688	0.0294542	0.0165896		49.2	0.0426	0.0469	0.048	0.0374	0.0262	0.0312	0.0285	0.0238		0.00266667	0.0100854	0.000947917	0.00881667	0.00360208	0.0132688	0.000954167	-0.00721042		7.11111e-06	0.000101716	8.98546e-07	7.77336e-05	1.2975e-05	0.00017606	9.10434e-07	5.19901e-05
49.4	0.0437167	0.0568354	0.0482979	0.0432167	0.0313521	0.0453687	0.0301042	0.0157396		49.4	0.0424	0.0466	0.048	0.0373	0.0261	0.0312	0.0285	0.0237		0.00131667	0.0102354	0.000297917	0.00591667	0.00525208	0.0141688	0.00160417	-0.00796042		1.73361e-06	0.000104764	8.87543e-08	3.50069e-05	2.75844e-05	0.000200753	2.57335e-06	6.33682e-05
49.6	0.0438667	0.0568854	0.0462479	0.0446167	0.0307021	0.0459687	0.0293542	0.0193396		49.6	0.0423	0.0464	0.0478	0.0373	0.0262	0.0311	0.0285	0.0237		0.00156667	0.0104854	-0.00155208	0.00731667	0.00450208	0.0148687	0.000854167	-0.00436042		2.45444e-06	0.000109944	2.40896e-06	5.35336e-05	2.02688e-05	0.00022108	7.29601e-07	1.90132e-05
49.8	0.0445667	0.0611354	0.0433979	0.0498667	0.0274021	0.0472187	0.0279042	0.0169396		49.8	0.0422	0.0462	0.0475	0.0372	0.0264	0.0309	0.0284	0.0238		0.00236667	0.0149354	-0.00410208	0.0126667	0.00100208	0.0163187	-0.000495833	-0.00686042		5.60111e-06	0.000223067	1.68271e-05	0.000160444	1.00417e-06	0.000266302	2.45851e-07	4.70653e-05
50	0.0442667	0.0567354	0.0422479	0.0444667	0.0291521	0.0434688	0.0280042	0.0190896		50	0.0421	0.0461	0.0472	0.0371	0.0266	0.0308	0.0282	0.0239		0.00216667	0.0106354	-0.00495208	0.00736667	0.00255208	0.0126687	-0.000195833	-0.00481042		4.69444e-06	0.000113112	2.45231e-05	5.42678e-05	6.51313e-06	0.000160497	3.83507e-08	2.31401e-05
50.2	0.0440167	0.0557854	0.0445479	0.0430667	0.0295521	0.0438687	0.0320042	0.0161396		50.2	0.042	0.0458	0.047	0.0369	0.0267	0.0309	0.0279	0.0235		0.00201667	0.00998542	-0.00245208	0.00616667	0.00285208	0.0129687	0.00410417	-0.00736042		4.06694e-06	9.97085e-05	6.01271e-06	3.80278e-05	8.13438e-06	0.000168188	1.68442e-05	5.41757e-05
50.4	0.0428167	0.0531854	0.0452479	0.0430167	0.0289021	0.0441687	0.0309542	0.0145396		50.4	0.0419	0.0456	0.0468	0.0368	0.0266	0.0311	0.0276	0.0229		0.000916667	0.00758542	-0.00155208	0.00621667	0.00230208	0.0130688	0.00335417	-0.00836042		8.40278e-07	5.75385e-05	2.40896e-06	3.86469e-05	5.29959e-06	0.000170792	1.12504e-05	6.98966e-05
50.6	0.0437167	0.0544354	0.0463479	0.0474167	0.0275521	0.0472687	0.0279042	0.0185396		50.6	0.0416	0.0454	0.0467	0.0367	0.0263	0.0314	0.0273	0.0221		0.00211667	0.00903542	-0.000352083	0.0107167	0.00125208	0.0158688	0.000604167	-0.00356042		4.48028e-06	8.16388e-05	1.23963e-07	0.000114847	1.56771e-06	0.000251817	3.65017e-07	1.26766e-05
50.8	0.0436167	0.0581854	0.0468479	0.0499167	0.0298521	0.0457188	0.0311542	0.0170396		50.8	0.0414	0.0452	0.0467	0.0366	0.0259	0.0316	0.0272	0.0215		0.00221667	0.0129854	0.000147917	0.0133167	0.00395208	0.0141187	0.00395417	-0.00446042		4.91361e-06	0.000168621	2.18793e-08	0.000177334	1.5619e-05	0.000199339	1.56354e-05	1.98953e-05
51	0.0427667	0.0584354	0.0440979	0.0450167	0.0305021	0.0466188	0.0305542	0.0175896		51	0.0412	0.0452	0.0467	0.0365	0.0256	0.0314	0.027	0.0212		0.00156667	0.0132354	-0.00260208	0.00851667	0.00490208	0.0152188	0.00355417	-0.00361042		2.45444e-06	0.000175176	6.77084e-06	7.25336e-05	2.40304e-05	0.00023161	1.26321e-05	1.30351e-05
51.2	0.0423667	0.0593854	0.0435979	0.0469667	0.0294021	0.0467687	0.0301042	0.0134896		51.2	0.0411	0.0452	0.0467	0.0363	0.0254	0.031	0.0267	0.0211		0.00126667	0.0141854	-0.00310208	0.0106667	0.00400208	0.0157687	0.00340417	-0.00761042		1.60444e-06	0.000201226	9.62292e-06	0.000113778	1.60167e-05	0.000248653	1.15884e-05	5.79184e-05
51.4	0.0433667	0.0566854	0.0405479	0.0450667	0.0320021	0.0445688	0.0272042	0.0165396		51.4	0.041	0.0452	0.0466	0.0361	0.0253	0.0304	0.0267	0.0213		0.00236667	0.0114854	-0.00605208	0.00896667	0.00670208	0.0141688	0.000504167	-0.00476042		5.60111e-06	0.000131915	3.66277e-05	8.04011e-05	4.49179e-05	0.000200753	2.54184e-07	2.26616e-05
51.6	0.0409667	0.0569854	0.0405479	0.0427667	0.0337021	0.0409187	0.0304542	0.0156396		51.6	0.0411	0.0453	0.0464	0.0359	0.0254	0.0298	0.0268	0.0217		-0.000133333	0.0116854	-0.00585208	0.00686667	0.00830208	0.0111187	0.00365417	-0.00606042		1.77778e-08	0.000136549	3.42469e-05	4.71511e-05	6.89246e-05	0.000123627	1.33529e-05	3.67287e-05
51.8	0.0440167	0.0569854	0.0443479	0.0433167	0.0318021	0.0427187	0.0281542	0.0142396		51.8	0.0411	0.0452	0.0462	0.0357	0.0255	0.0294	0.0269	0.0222		0.00291667	0.0117854	-0.00185208	0.00761667	0.00630208	0.0133188	0.00125417	-0.00796042		8.50694e-06	0.000138896	3.43021e-06	5.80136e-05	3.97163e-05	0.000177389	1.57293e-06	6.33682e-05
52	0.0426167	0.0546354	0.0461479	0.0421167	0.0321021	0.0424687	0.0269042	0.0167896		52	0.0411	0.045	0.046	0.0357	0.0256	0.0292	0.0268	0.0225		0.00151667	0.00963542	0.000147917	0.00641667	0.00650208	0.0132687	0.000104167	-0.00571042		2.30028e-06	9.28413e-05	2.18793e-08	4.11736e-05	4.22771e-05	0.00017606	1.08507e-08	3.26089e-05
52.2	0.0420167	0.0532354	0.0450979	0.0444167	0.0310021	0.0410187	0.0296042	0.0150396		52.2	0.0411	0.0448	0.0459	0.0357	0.0256	0.0293	0.0266	0.0225		0.000916667	0.00843542	-0.000802083	0.00871667	0.00540208	0.0117188	0.00300417	-0.00746042		8.40278e-07	7.11563e-05	6.43338e-07	7.59803e-05	2.91825e-05	0.000137329	9.02502e-06	5.56578e-05
52.4	0.0430167	0.0563354	0.0432479	0.0458667	0.0286521	0.0402187	0.0322042	0.0148396		52.4	0.0409	0.0445	0.0459	0.0359	0.0254	0.0295	0.0266	0.0223		0.00211667	0.0118354	-0.00265208	0.00996667	0.00325208	0.0107187	0.00560417	-0.00746042		4.48028e-06	0.000140077	7.03355e-06	9.93344e-05	1.0576e-05	0.000114892	3.14067e-05	5.56578e-05
52.6	0.0405667	0.0566354	0.0430479	0.0418167	0.0270521	0.0415188	0.0294042	0.0136396		52.6	0.0406	0.0442	0.0458	0.036	0.0251	0.0298	0.0268	0.0219		-3.33333e-05	0.0124354	-0.00275208	0.00581667	0.00195208	0.0117188	0.00260417	-0.00826042		1.11111e-09	0.00015464	7.57396e-06	3.38336e-05	3.81063e-06	0.000137329	6.78168e-06	6.82345e-05
52.8	0.0408667	0.0580354	0.0422979	0.0422667	0.0289521	0.0417187	0.0291542	0.0165896		52.8	0.0402	0.0439	0.0458	0.0359	0.0248	0.03	0.0271	0.0216		0.000666667	0.0141354	-0.00350208	0.00636667	0.00415208	0.0117188	0.00205417	-0.00501042		4.44444e-07	0.00019981	1.22646e-05	4.05344e-05	1.72398e-05	0.000137329	4.2196e-06	2.51043e-05
53	0.0430167	0.0594354	0.0422979	0.0421667	0.0280521	0.0439687	0.0290542	0.0162896		53	0.0399	0.0436	0.0456	0.0357	0.0246	0.0301	0.0272	0.0217		0.00311667	0.0158354	-0.00330208	0.00646667	0.00345208	0.0138687	0.00185417	-0.00541042		9.71361e-06	0.00025076	1.09038e-05	4.18178e-05	1.19169e-05	0.000192342	3.43793e-06	2.92726e-05
53.2	0.0423667	0.0609354	0.0435479	0.0433167	0.0294521	0.0429688	0.0298042	0.0161396		53.2	0.0396	0.0434	0.0454	0.0354	0.0245	0.0299	0.0273	0.0219		0.00276667	0.0175354	-0.00185208	0.00791667	0.00495208	0.0130688	0.00250417	-0.00576042		7.65444e-06	0.000307491	3.43021e-06	6.26736e-05	2.45231e-05	0.000170792	6.27085e-06	3.31824e-05
53.4	0.0418167	0.0566354	0.0437979	0.0410167	0.0294021	0.0433188	0.0306542	0.0148896		53.4	0.0395	0.0432	0.045	0.0352	0.0246	0.0296	0.0272	0.0221		0.00231667	0.0134354	-0.00120208	0.00581667	0.00480208	0.0137188	0.00345417	-0.00721042		5.36694e-06	0.00018051	1.445e-06	3.38336e-05	2.306e-05	0.000188204	1.19313e-05	5.19901e-05
53.6	0.0412667	0.0527354	0.0444479	0.0388167	0.0279521	0.0461188	0.0262042	0.0113396		53.6	0.0393	0.0429	0.0447	0.0349	0.0248	0.0294	0.0269	0.022		0.00196667	0.00983542	-0.000252083	0.00391667	0.00315208	0.0167188	-0.000695833	-0.0106604		3.86778e-06	9.67354e-05	6.3546e-08	1.53403e-05	9.93563e-06	0.000279517	4.84184e-07	0.000113644
53.8	0.0410667	0.0553354	0.0448479	0.0414167	0.0278021	0.0445688	0.0285542	0.0122896		53.8	0.0392	0.0428	0.0443	0.0346	0.025	0.0293	0.0265	0.0217		0.00186667	0.0125354	0.000547917	0.00681667	0.00280208	0.0152688	0.00205417	-0.00941042		3.48444e-06	0.000157137	3.00213e-07	4.64669e-05	7.85167e-06	0.000233135	4.2196e-06	8.85559e-05
54	0.0412667	0.0542854	0.0441979	0.0451667	0.0277521	0.0415688	0.0270042	0.0118396		54	0.0392	0.0427	0.0441	0.0344	0.025	0.0295	0.026	0.0212		0.00206667	0.0115854	9.79167e-05	0.0107667	0.00275208	0.0120688	0.00100417	-0.00936042		4.27111e-06	0.000134222	9.58767e-09	0.000115921	7.57396e-06	0.000145655	1.00835e-06	8.76174e-05
54.2	0.0429167	0.0545354	0.0423479	0.0443167	0.0285021	0.0422687	0.0253542	0.0121896		54.2	0.0391	0.0427	0.044	0.0343	0.0247	0.0298	0.0256	0.0206		0.00381667	0.0118354	-0.00165208	0.0100167	0.00380208	0.0124687	-0.000245833	-0.00841042		1.45669e-05	0.000140077	2.72938e-06	0.000100334	1.44558e-05	0.00015547	6.0434e-08	7.07351e-05
54.4	0.0388667	0.0544354	0.0405479	0.0442167	0.0276021	0.0430687	0.0257542	0.0168896		54.4	0.039	0.0428	0.044	0.0343	0.0242	0.0299	0.0255	0.0202		-0.000133333	0.0116354	-0.00345208	0.00991667	0.00340208	0.0131687	0.000254167	-0.00331042		1.77778e-08	0.000135383	1.19169e-05	9.83403e-05	1.15742e-05	0.000173416	6.46007e-08	1.09589e-05
54.6	0.0417667	0.0492354	0.0413979	0.0418167	0.0286021	0.0447188	0.0287042	0.0152396		54.6	0.0389	0.0428	0.0442	0.0343	0.0238	0.0299	0.0254	0.0201		0.00286667	0.00643542	-0.00280208	0.00751667	0.00480208	0.0148188	0.00330417	-0.00486042		8.21778e-06	4.14146e-05	7.85167e-06	5.65003e-05	2.306e-05	0.000219595	1.09175e-05	2.36237e-05
54.8	0.0409667	0.0496854	0.0432979	0.0372167	0.0288021	0.0426687	0.0272042	0.0174896		54.8	0.0389	0.0429	0.0443	0.0343	0.0236	0.0296	0.0253	0.0202		0.00206667	0.00678542	-0.00100208	0.00291667	0.00520208	0.0130687	0.00190417	-0.00271042		4.27111e-06	4.60419e-05	1.00417e-06	8.50694e-06	2.70617e-05	0.000170792	3.62585e-06	7.34636e-06
55	0.0416167	0.0557854	0.0455479	0.0400667	0.0309021	0.0413188	0.0291542	0.0124896		55	0.0388	0.0429	0.0444	0.0342	0.0235	0.0291	0.0251	0.0205		0.00281667	0.0128854	0.00114792	0.00586667	0.00740208	0.0122188	0.00405417	-0.00801042		7.93361e-06	0.000166034	1.31771e-06	3.44178e-05	5.47908e-05	0.000149298	1.64363e-05	6.41668e-05
55.2	0.0411167	0.0581354	0.0426479	0.0405167	0.0306521	0.0430188	0.0290042	0.0104396		55.2	0.0388	0.0429	0.0444	0.0341	0.0236	0.0286	0.0252	0.0207		0.00231667	0.0152354	-0.00175208	0.00641667	0.00705208	0.0144188	0.00380417	-0.0102604		5.36694e-06	0.000232118	3.0698e-06	4.11736e-05	4.97319e-05	0.0002079	1.44717e-05	0.000105276
55.4	0.0407167	0.0550354	0.0432479	0.0411667	0.0307021	0.0415688	0.0266042	0.0114396		55.4	0.0388	0.0429	0.0443	0.0341	0.0238	0.0282	0.0254	0.0209		0.00191667	0.0121354	-0.00105208	0.00706667	0.00690208	0.0133688	0.00120417	-0.00946042		3.67361e-06	0.000147268	1.10688e-06	4.99378e-05	4.76388e-05	0.000178723	1.45002e-06	8.94995e-05
55.6	0.0395667	0.0538354	0.0427479	0.0437667	0.0325021	0.0424687	0.0268542	0.0145896		55.6	0.0389	0.0428	0.0441	0.0341	0.0239	0.028	0.0255	0.0208		0.000666667	0.0110354	-0.00135208	0.00966667	0.00860208	0.0144687	0.00135417	-0.00621042		4.44444e-07	0.00012178	1.82813e-06	9.34444e-05	7.39958e-05	0.000209345	1.83377e-06	3.85693e-05
55.8	0.0387667	0.0544354	0.0420979	0.0443167	0.0317521	0.0483188	0.0261542	0.0122396		55.8	0.0389	0.0427	0.0439	0.034	0.0239	0.028	0.0256	0.0207		-0.000133333	0.0117354	-0.00180208	0.0103167	0.00785208	0.0203188	0.000554167	-0.00846042		1.77778e-08	0.00013772	3.2475e-06	0.000106434	6.16552e-05	0.000412852	3.07101e-07	7.15787e-05
56	0.0397167	0.0535354	0.0391979	0.0425167	0.0297521	0.0442188	0.0272042	0.00968958		56	0.039	0.0426	0.0438	0.034	0.0238	0.0281	0.0257	0.0207		0.000716667	0.0109354	-0.00460208	0.00851667	0.00595208	0.0161188	0.00150417	-0.0110104		5.13611e-07	0.000119583	2.11792e-05	7.25336e-05	3.54273e-05	0.000259814	2.26252e-06	0.000121229
56.2	0.0407167	0.0506854	0.0406979	0.0421667	0.0281021	0.0435187	0.0273542	0.00968958		56.2	0.0388	0.0424	0.0438	0.0341	0.0236	0.0284	0.0259	0.0206		0.00191667	0.00828542	-0.00310208	0.00806667	0.00450208	0.0151187	0.00145417	-0.0109104		3.67361e-06	6.86481e-05	9.62292e-06	6.50711e-05	2.02688e-05	0.000228577	2.1146e-06	0.000119037
56.4	0.0395667	0.0550854	0.0424979	0.0396667	0.0270521	0.0430687	0.0291042	0.0103396		56.4	0.0386	0.0423	0.0438	0.0341	0.0234	0.0288	0.0261	0.0206		0.000966667	0.0127854	-0.00130208	0.00556667	0.00365208	0.0142687	0.00300417	-0.0102604		9.34444e-07	0.000163467	1.69542e-06	3.09878e-05	1.33377e-05	0.000203597	9.02502e-06	0.000105276
56.6	0.0401667	0.0557854	0.0447979	0.0393667	0.0238521	0.0409687	0.0238542	0.00943958		56.6	0.0384	0.042	0.0438	0.0341	0.0233	0.029	0.0262	0.0208		0.00176667	0.0137854	0.000997917	0.00526667	0.000552083	0.0119687	-0.00234583	-0.0113604		3.12111e-06	0.000190038	9.95838e-07	2.77378e-05	3.04796e-07	0.000143251	5.50293e-06	0.000129059
56.8	0.0386667	0.0522854	0.0452979	0.0419667	0.0245021	0.0405688	0.0257042	0.00958958		56.8	0.0382	0.0418	0.0438	0.0339	0.0233	0.0289	0.0261	0.0209		0.000466667	0.0104854	0.00149792	0.00806667	0.00120208	0.0116688	-0.000395833	-0.0113104		2.17778e-07	0.000109944	2.24375e-06	6.50711e-05	1.445e-06	0.00013616	1.56684e-07	0.000127926
57	0.0401667	0.0543854	0.0437479	0.0391167	0.0252521	0.0414187	0.0246542	0.00773958		57	0.038	0.0416	0.0436	0.0336	0.0234	0.0286	0.0257	0.0209		0.00216667	0.0127854	0.000147917	0.00551667	0.00185208	0.0128187	-0.00104583	-0.0131604		4.69444e-06	0.000163467	2.18793e-08	3.04336e-05	3.43021e-06	0.00016432	1.09377e-06	0.000173197
57.2	0.0395667	0.0512854	0.0435979	0.0419667	0.0287021	0.0368187	0.0249542	0.00683958		57.2	0.0379	0.0414	0.0433	0.0334	0.0236	0.0283	0.0253	0.0206		0.00166667	0.00988542	0.000297917	0.00856667	0.00510208	0.00851875	-0.000345833	-0.0137604		2.77778e-06	9.77215e-05	8.87543e-08	7.33878e-05	2.60313e-05	7.25691e-05	1.19601e-07	0.000189349
57.4	0.0402667	0.0519354	0.0421979	0.0412167	0.0277521	0.0406187	0.0260042	0.0133396		57.4	0.0378	0.0412	0.043	0.0331	0.0237	0.0281	0.0248	0.0202		0.00246667	0.0107354	-0.000802083	0.00811667	0.00405208	0.0125187	0.00120417	-0.00686042		6.08444e-06	0.000115249	6.43338e-07	6.58803e-05	1.64194e-05	0.000156719	1.45002e-06	4.70653e-05
57.6	0.0407667	0.0526354	0.0418479	0.0399667	0.0297521	0.0389188	0.0260042	0.0152396		57.6	0.0377	0.041	0.0428	0.0329	0.0236	0.0281	0.0243	0.0199		0.00306667	0.0116354	-0.000952083	0.00706667	0.00615208	0.0108188	0.00170417	-0.00466042		9.40444e-06	0.000135383	9.06463e-07	4.99378e-05	3.78481e-05	0.000117045	2.90418e-06	2.17195e-05
57.8	0.0408667	0.0554854	0.0412479	0.0395167	0.0284521	0.0421687	0.0276542	0.0137396		57.8	0.0376	0.0409	0.0426	0.0328	0.0233	0.0282	0.024	0.0196		0.00326667	0.0145854	-0.00135208	0.00671667	0.00515208	0.0139687	0.00365417	-0.00586042		1.06711e-05	0.000212734	1.82813e-06	4.51136e-05	2.6544e-05	0.000195126	1.33529e-05	3.43445e-05
58	0.0399667	0.0536354	0.0427479	0.0409167	0.0279021	0.0432688	0.0284042	0.0102396		58	0.0375	0.0407	0.0424	0.0328	0.0229	0.0283	0.024	0.0194		0.00246667	0.0129354	0.000347917	0.00811667	0.00500208	0.0149688	0.00440417	-0.00916042		6.08444e-06	0.000167325	1.21046e-07	6.58803e-05	2.50208e-05	0.000224063	1.93967e-05	8.39132e-05
58.2	0.0395167	0.0546854	0.0445979	0.0419667	0.0289021	0.0435687	0.0288542	0.00773958		58.2	0.0373	0.0406	0.0424	0.0329	0.0226	0.0284	0.0241	0.0191		0.00221667	0.0140854	0.00219792	0.00906667	0.00630208	0.0151687	0.00475417	-0.0113604		4.91361e-06	0.000198399	4.83084e-06	8.22044e-05	3.97163e-05	0.000230091	2.26021e-05	0.000129059
58.4	0.0368167	0.0527354	0.0456979	0.0409167	0.0312521	0.0426687	0.0259042	0.00368958		58.4	0.0372	0.0405	0.0424	0.0329	0.0224	0.0283	0.0242	0.0189		-0.000383333	0.0122354	0.00329792	0.00801667	0.00885208	0.0143687	0.00170417	-0.0152104		1.46944e-07	0.000149705	1.08763e-05	6.42669e-05	7.83594e-05	0.000206461	2.90418e-06	0.000231357
58.6	0.0380167	0.0485854	0.0421479	0.0415667	0.0301021	0.0416688	0.0282542	0.00368958		58.6	0.037	0.0404	0.0424	0.0328	0.0223	0.028	0.0241	0.0188		0.00101667	0.00818542	-0.000252083	0.00876667	0.00780208	0.0136688	0.00415417	-0.0151104		1.03361e-06	6.7001e-05	6.3546e-08	7.68544e-05	6.08725e-05	0.000186835	1.72571e-05	0.000228325
58.8	0.0403667	0.0506854	0.0412479	0.0429667	0.0299021	0.0397187	0.0243542	0.0100896		58.8	0.0369	0.0403	0.0424	0.0327	0.0223	0.0275	0.0241	0.019		0.00346667	0.0103854	-0.00115208	0.0102667	0.00760208	0.0122187	0.000254167	-0.00891042		1.20178e-05	0.000107857	1.3273e-06	0.000105404	5.77917e-05	0.000149298	6.46007e-08	7.93955e-05
59	0.0390167	0.0485854	0.0400479	0.0412667	0.0264521	0.0409687	0.0237542	0.0127896		59	0.0368	0.0403	0.0423	0.0325	0.0224	0.0271	0.0241	0.0192		0.00221667	0.00828542	-0.00225208	0.00876667	0.00405208	0.0138687	-0.000345833	-0.00641042		4.91361e-06	6.86481e-05	5.07188e-06	7.68544e-05	1.64194e-05	0.000192342	1.19601e-07	4.10934e-05
59.2	0.0354667	0.0496354	0.0402979	0.0382167	0.0267521	0.0361187	0.0269542	0.0165396		59.2	0.0367	0.0402	0.0421	0.0324	0.0225	0.0268	0.0243	0.0194		-0.00123333	0.00943542	-0.00180208	0.00581667	0.00425208	0.00931875	0.00265417	-0.00286042		1.52111e-06	8.90271e-05	3.2475e-06	3.38336e-05	1.80802e-05	8.68391e-05	7.0446e-06	8.18198e-06
59.4	0.0371167	0.0516354	0.0388979	0.0395667	0.0270521	0.0343688	0.0266042	0.0183396		59.4	0.0366	0.0402	0.0419	0.0323	0.0225	0.0266	0.0244	0.0196		0.000516667	0.0114354	-0.00300208	0.00726667	0.00455208	0.00776875	0.00220417	-0.00126042		2.66944e-07	0.000130769	9.0125e-06	5.28044e-05	2.07215e-05	6.03535e-05	4.85835e-06	1.58865e-06
59.6	0.0373667	0.0495854	0.0407979	0.0404667	0.0251521	0.0365188	0.0259542	0.0155896		59.6	0.0366	0.0402	0.0417	0.0322	0.0224	0.0267	0.0244	0.0198		0.000766667	0.00938542	-0.000902083	0.00826667	0.00275208	0.00981875	0.00155417	-0.00421042		5.87778e-07	8.8086e-05	8.13754e-07	6.83378e-05	7.57396e-06	9.64079e-05	2.41543e-06	1.77276e-05
59.8	0.0385667	0.0506354	0.0422979	0.0356667	0.0250021	0.0384188	0.0274542	0.0118396		59.8	0.0366	0.0401	0.0416	0.0321	0.0223	0.0269	0.0244	0.0199		0.00196667	0.0105354	0.000697917	0.00356667	0.00270208	0.0115188	0.00305417	-0.00806042		3.86778e-06	0.000110995	4.87088e-07	1.27211e-05	7.30125e-06	0.000132682	9.32793e-06	6.49703e-05
60	0.0361667	0.0491854	0.0415479	0.0376667	0.0264521	0.0390687	0.0280542	0.0124396		60	0.0365	0.0401	0.0415	0.032	0.0221	0.0272	0.0244	0.0199		-0.000333333	0.00908542	4.79167e-05	0.00566667	0.00435208	0.0118688	0.00365417	-0.00746042		1.11111e-07	8.25448e-05	2.29601e-09	3.21111e-05	1.89406e-05	0.000140867	1.33529e-05	5.56578e-05

## Sheet: 2B_Staggered_RMSE(BR_10)_PPMCC
t	S3	S4	S5	S6	S7	S8	S9	S10		HEC_BR_10_P3	HEC_BR_10_P4	HEC_BR_10_P5	HEC_BR_10_P6	HEC_BR_10_P7	HEC_BR_10_P8	HEC_BR_10_P9	HEC_BR_10_P10		Error_3	Error_4	Error_5	Error_6	Error_7	Error_8	Error_9	Error_10		Error^2_3	Error^2_4	Error^2_5	Error^2_6	Error^2_7	Error^2_8	Error^2_9	Error^2_10		RMSE_3	RMSE_4	RMSE_5	RMSE_6	RMSE_7	RMSE_8	RMSE_9	RMSE_10
0	-3.33333e-05	3.54167e-05	-0.000102083	-3.33333e-05	0.000152083	-0.00013125	-4.58333e-05	-1.04167e-05		0	0	0	0	0	0	0	0		-3.33333e-05	3.54167e-05	-0.000102083	-3.33333e-05	0.000152083	-0.00013125	-4.58333e-05	-1.04167e-05		1.11111e-09	1.25434e-09	1.0421e-08	1.11111e-09	2.31293e-08	1.72266e-08	2.10069e-09	1.08507e-10		0.784591	1.07499	0.814346	0.94386	0.361589	1.46276	0.275829	0.625157
0.2	0.000116667	0.000385417	-0.000102083	-8.33333e-05	0.000302083	-8.125e-05	5.41667e-05	-0.000160417		0	0	0	0	0	0	0	0		0.000116667	0.000385417	-0.000102083	-8.33333e-05	0.000302083	-8.125e-05	5.41667e-05	-0.000160417		1.36111e-08	1.48546e-07	1.0421e-08	6.94444e-09	9.12543e-08	6.60156e-09	2.93403e-09	2.57335e-08
0.4	1.66667e-05	-0.000114583	-2.08333e-06	-3.33333e-05	5.20833e-05	-0.00013125	0.000204167	-1.04167e-05		0	0	0	0	0	0	0	0		1.66667e-05	-0.000114583	-2.08333e-06	-3.33333e-05	5.20833e-05	-0.00013125	0.000204167	-1.04167e-05		2.77778e-10	1.31293e-08	4.34028e-12	1.11111e-09	2.71267e-09	1.72266e-08	4.1684e-08	1.08507e-10	PPMCC	0.948211	0.930754	0.968786	0.988808	0.973032	0.986516	0.987077	0.936548
0.6	-8.33333e-05	-1.45833e-05	4.79167e-05	1.66667e-05	-4.79167e-05	1.875e-05	-0.000195833	-1.04167e-05		0	0	0	0	0	0	0	0		-8.33333e-05	-1.45833e-05	4.79167e-05	1.66667e-05	-4.79167e-05	1.875e-05	-0.000195833	-1.04167e-05		6.94444e-09	2.12674e-10	2.29601e-09	2.77778e-10	2.29601e-09	3.51562e-10	3.83507e-08	1.08507e-10
0.8	-3.33333e-05	0.000135417	-2.08333e-06	6.66667e-05	-0.000147917	-0.00013125	-9.58333e-05	0.000189583		0	0	0	0	0	0	0	0		-3.33333e-05	0.000135417	-2.08333e-06	6.66667e-05	-0.000147917	-0.00013125	-9.58333e-05	0.000189583		1.11111e-09	1.83377e-08	4.34028e-12	4.44444e-09	2.18793e-08	1.72266e-08	9.18403e-09	3.59418e-08
1	-8.33333e-05	8.54167e-05	4.79167e-05	6.66667e-05	-0.000147917	6.875e-05	4.16667e-06	-1.04167e-05		0	0	0	0	0	0	0	0		-8.33333e-05	8.54167e-05	4.79167e-05	6.66667e-05	-0.000147917	6.875e-05	4.16667e-06	-1.04167e-05		6.94444e-09	7.29601e-09	2.29601e-09	4.44444e-09	2.18793e-08	4.72656e-09	1.73611e-11	1.08507e-10
1.2	6.66667e-05	-0.000114583	4.79167e-05	0.000266667	-0.000147917	1.875e-05	-4.58333e-05	-0.000110417		0	0	0	0	0	0	0	0		6.66667e-05	-0.000114583	4.79167e-05	0.000266667	-0.000147917	1.875e-05	-4.58333e-05	-0.000110417		4.44444e-09	1.31293e-08	2.29601e-09	7.11111e-08	2.18793e-08	3.51562e-10	2.10069e-09	1.21918e-08
1.4	1.66667e-05	3.54167e-05	4.79167e-05	-8.33333e-05	-0.000147917	6.875e-05	5.41667e-05	0.000139583		0	0	0	0	0	0	0	0		1.66667e-05	3.54167e-05	4.79167e-05	-8.33333e-05	-0.000147917	6.875e-05	5.41667e-05	0.000139583		2.77778e-10	1.25434e-09	2.29601e-09	6.94444e-09	2.18793e-08	4.72656e-09	2.93403e-09	1.94835e-08
1.6	0.000316667	3.54167e-05	4.79167e-05	-8.33333e-05	-9.79167e-05	6.875e-05	0.000104167	3.95833e-05		0	0	0	0	0	0	0	0		0.000316667	3.54167e-05	4.79167e-05	-8.33333e-05	-9.79167e-05	6.875e-05	0.000104167	3.95833e-05		1.00278e-07	1.25434e-09	2.29601e-09	6.94444e-09	9.58767e-09	4.72656e-09	1.08507e-08	1.56684e-09
1.8	1.66667e-05	-0.000164583	4.79167e-05	-8.33333e-05	-9.79167e-05	0.00021875	0.000104167	-0.000160417		0	0	0	0	0	0	0	0		1.66667e-05	-0.000164583	4.79167e-05	-8.33333e-05	-9.79167e-05	0.00021875	0.000104167	-0.000160417		2.77778e-10	2.70877e-08	2.29601e-09	6.94444e-09	9.58767e-09	4.78516e-08	1.08507e-08	2.57335e-08
2	-0.000133333	-6.45833e-05	4.79167e-05	-3.33333e-05	2.08333e-06	1.875e-05	-0.000145833	-1.04167e-05		0	0	0	0	0	0	0	0		-0.000133333	-6.45833e-05	4.79167e-05	-3.33333e-05	2.08333e-06	1.875e-05	-0.000145833	-1.04167e-05		1.77778e-08	4.17101e-09	2.29601e-09	1.11111e-09	4.34028e-12	3.51562e-10	2.12674e-08	1.08507e-10
2.2	1.66667e-05	-1.45833e-05	-2.08333e-06	1.66667e-05	-4.79167e-05	6.875e-05	-4.58333e-05	-6.04167e-05		0	0	0	0	0	0	0	0		1.66667e-05	-1.45833e-05	-2.08333e-06	1.66667e-05	-4.79167e-05	6.875e-05	-4.58333e-05	-6.04167e-05		2.77778e-10	2.12674e-10	4.34028e-12	2.77778e-10	2.29601e-09	4.72656e-09	2.10069e-09	3.65017e-09
2.4	-8.33333e-05	0.000135417	4.79167e-05	-3.33333e-05	5.20833e-05	6.875e-05	5.41667e-05	0.000139583		0	0	0	0	0	0	0	0		-8.33333e-05	0.000135417	4.79167e-05	-3.33333e-05	5.20833e-05	6.875e-05	5.41667e-05	0.000139583		6.94444e-09	1.83377e-08	2.29601e-09	1.11111e-09	2.71267e-09	4.72656e-09	2.93403e-09	1.94835e-08
2.6	0.000116667	-0.000114583	-5.20833e-05	1.66667e-05	-9.79167e-05	-0.00013125	-4.58333e-05	-6.04167e-05		0	0	0	0	0	0	0	0		0.000116667	-0.000114583	-5.20833e-05	1.66667e-05	-9.79167e-05	-0.00013125	-4.58333e-05	-6.04167e-05		1.36111e-08	1.31293e-08	2.71267e-09	2.77778e-10	9.58767e-09	1.72266e-08	2.10069e-09	3.65017e-09
2.8	6.66667e-05	-6.45833e-05	-2.08333e-06	6.66667e-05	5.20833e-05	-8.125e-05	5.41667e-05	-0.000110417		0	0	0	0	0	0	0	0		6.66667e-05	-6.45833e-05	-2.08333e-06	6.66667e-05	5.20833e-05	-8.125e-05	5.41667e-05	-0.000110417		4.44444e-09	4.17101e-09	4.34028e-12	4.44444e-09	2.71267e-09	6.60156e-09	2.93403e-09	1.21918e-08
3	-0.000133333	-1.45833e-05	4.79167e-05	0.000116667	5.20833e-05	-0.00013125	0.000104167	0.000139583		0	0	0	0	0	0	0	0		-0.000133333	-1.45833e-05	4.79167e-05	0.000116667	5.20833e-05	-0.00013125	0.000104167	0.000139583		1.77778e-08	2.12674e-10	2.29601e-09	1.36111e-08	2.71267e-09	1.72266e-08	1.08507e-08	1.94835e-08
3.2	-3.33333e-05	8.54167e-05	-5.20833e-05	0.000116667	5.20833e-05	6.875e-05	-0.000195833	3.95833e-05		0	0	0	0	0	0	0	0		-3.33333e-05	8.54167e-05	-5.20833e-05	0.000116667	5.20833e-05	6.875e-05	-0.000195833	3.95833e-05		1.11111e-09	7.29601e-09	2.71267e-09	1.36111e-08	2.71267e-09	4.72656e-09	3.83507e-08	1.56684e-09
3.4	-0.000133333	-0.000164583	-2.08333e-06	-0.000133333	2.08333e-06	-0.00013125	-9.58333e-05	-0.000160417		0	0	0	0	0	0	0	0		-0.000133333	-0.000164583	-2.08333e-06	-0.000133333	2.08333e-06	-0.00013125	-9.58333e-05	-0.000160417		1.77778e-08	2.70877e-08	4.34028e-12	1.77778e-08	4.34028e-12	1.72266e-08	9.18403e-09	2.57335e-08
3.6	1.66667e-05	-6.45833e-05	4.79167e-05	-8.33333e-05	2.08333e-06	1.875e-05	-4.58333e-05	3.95833e-05		0	0	0	0	0	0	0	0		1.66667e-05	-6.45833e-05	4.79167e-05	-8.33333e-05	2.08333e-06	1.875e-05	-4.58333e-05	3.95833e-05		2.77778e-10	4.17101e-09	2.29601e-09	6.94444e-09	4.34028e-12	3.51562e-10	2.10069e-09	1.56684e-09
3.8	1.66667e-05	-1.45833e-05	-2.08333e-06	-3.33333e-05	2.08333e-06	-3.125e-05	-4.58333e-05	-1.04167e-05		0	0	0	0	0	0	0	0		1.66667e-05	-1.45833e-05	-2.08333e-06	-3.33333e-05	2.08333e-06	-3.125e-05	-4.58333e-05	-1.04167e-05		2.77778e-10	2.12674e-10	4.34028e-12	1.11111e-09	4.34028e-12	9.76563e-10	2.10069e-09	1.08507e-10
4	6.66667e-05	0.000135417	4.79167e-05	-3.33333e-05	5.20833e-05	0.00011875	5.41667e-05	0.000189583		0	0	0	0	0	0	0	0		6.66667e-05	0.000135417	4.79167e-05	-3.33333e-05	5.20833e-05	0.00011875	5.41667e-05	0.000189583		4.44444e-09	1.83377e-08	2.29601e-09	1.11111e-09	2.71267e-09	1.41016e-08	2.93403e-09	3.59418e-08
4.2	-3.33333e-05	-0.000114583	-5.20833e-05	1.66667e-05	5.20833e-05	-3.125e-05	0.000104167	-1.04167e-05		0	0	0	0	0	0	0	0		-3.33333e-05	-0.000114583	-5.20833e-05	1.66667e-05	5.20833e-05	-3.125e-05	0.000104167	-1.04167e-05		1.11111e-09	1.31293e-08	2.71267e-09	2.77778e-10	2.71267e-09	9.76563e-10	1.08507e-08	1.08507e-10
4.4	-0.000133333	-1.45833e-05	-0.000152083	-3.33333e-05	5.20833e-05	0.00016875	0.000204167	-0.000110417		0	0	0	0	0	0	0	0		-0.000133333	-1.45833e-05	-0.000152083	-3.33333e-05	5.20833e-05	0.00016875	0.000204167	-0.000110417		1.77778e-08	2.12674e-10	2.31293e-08	1.11111e-09	2.71267e-09	2.84766e-08	4.1684e-08	1.21918e-08
4.6	6.66667e-05	-1.45833e-05	-2.08333e-06	1.66667e-05	0.000102083	1.875e-05	-9.58333e-05	8.95833e-05		0	0	0	0	0	0	0	0		6.66667e-05	-1.45833e-05	-2.08333e-06	1.66667e-05	0.000102083	1.875e-05	-9.58333e-05	8.95833e-05		4.44444e-09	2.12674e-10	4.34028e-12	2.77778e-10	1.0421e-08	3.51562e-10	9.18403e-09	8.02517e-09
4.8	-3.33333e-05	0.000135417	-2.08333e-06	6.66667e-05	0.000102083	0.00021875	-9.58333e-05	3.95833e-05		0	0	0	0	0	0	0	0		-3.33333e-05	0.000135417	-2.08333e-06	6.66667e-05	0.000102083	0.00021875	-9.58333e-05	3.95833e-05		1.11111e-09	1.83377e-08	4.34028e-12	4.44444e-09	1.0421e-08	4.78516e-08	9.18403e-09	1.56684e-09
5	0.000166667	-0.000164583	-5.20833e-05	0.000166667	0.000302083	6.875e-05	4.16667e-06	-0.000160417		0	0	0	0	0	0	0	0		0.000166667	-0.000164583	-5.20833e-05	0.000166667	0.000302083	6.875e-05	4.16667e-06	-0.000160417		2.77778e-08	2.70877e-08	2.71267e-09	2.77778e-08	9.12543e-08	4.72656e-09	1.73611e-11	2.57335e-08
5.2	1.66667e-05	-1.45833e-05	-0.000102083	-8.33333e-05	0.000102083	-3.125e-05	4.16667e-06	-1.04167e-05		0	0	0	0	0	0	0	0		1.66667e-05	-1.45833e-05	-0.000102083	-8.33333e-05	0.000102083	-3.125e-05	4.16667e-06	-1.04167e-05		2.77778e-10	2.12674e-10	1.0421e-08	6.94444e-09	1.0421e-08	9.76563e-10	1.73611e-11	1.08507e-10
5.4	-0.000183333	-1.45833e-05	-2.08333e-06	-0.000183333	-4.79167e-05	1.875e-05	5.41667e-05	-1.04167e-05		0	0	0	0	0	0	0	0		-0.000183333	-1.45833e-05	-2.08333e-06	-0.000183333	-4.79167e-05	1.875e-05	5.41667e-05	-1.04167e-05		3.36111e-08	2.12674e-10	4.34028e-12	3.36111e-08	2.29601e-09	3.51562e-10	2.93403e-09	1.08507e-10
5.6	1.66667e-05	0.000135417	-5.20833e-05	-8.33333e-05	-0.000147917	-0.00013125	0.000154167	0.000189583		0	0	0	0	0	0	0	0		1.66667e-05	0.000135417	-5.20833e-05	-8.33333e-05	-0.000147917	-0.00013125	0.000154167	0.000189583		2.77778e-10	1.83377e-08	2.71267e-09	6.94444e-09	2.18793e-08	1.72266e-08	2.37674e-08	3.59418e-08
5.8	-8.33333e-05	-0.000114583	4.79167e-05	-8.33333e-05	-0.000147917	-3.125e-05	-0.000145833	-1.04167e-05		0	0	0	0	0	0	0	0		-8.33333e-05	-0.000114583	4.79167e-05	-8.33333e-05	-0.000147917	-3.125e-05	-0.000145833	-1.04167e-05		6.94444e-09	1.31293e-08	2.29601e-09	6.94444e-09	2.18793e-08	9.76563e-10	2.12674e-08	1.08507e-10
6	6.66667e-05	-0.000164583	-5.20833e-05	1.66667e-05	-0.000147917	-0.00013125	-0.000145833	-0.000110417		0	0	0	0	0	0	0	0		6.66667e-05	-0.000164583	-5.20833e-05	1.66667e-05	-0.000147917	-0.00013125	-0.000145833	-0.000110417		4.44444e-09	2.70877e-08	2.71267e-09	2.77778e-10	2.18793e-08	1.72266e-08	2.12674e-08	1.21918e-08
6.2	-0.000133333	3.54167e-05	-5.20833e-05	-3.33333e-05	-0.000147917	6.875e-05	4.16667e-06	0.000139583		0	0	0	0	0	0	0	0		-0.000133333	3.54167e-05	-5.20833e-05	-3.33333e-05	-0.000147917	6.875e-05	4.16667e-06	0.000139583		1.77778e-08	1.25434e-09	2.71267e-09	1.11111e-09	2.18793e-08	4.72656e-09	1.73611e-11	1.94835e-08
6.4	-0.000133333	0.000185417	-0.000102083	-3.33333e-05	-0.000147917	-8.125e-05	4.16667e-06	8.95833e-05		0	0	0	0	0	0	0	0		-0.000133333	0.000185417	-0.000102083	-3.33333e-05	-0.000147917	-8.125e-05	4.16667e-06	8.95833e-05		1.77778e-08	3.43793e-08	1.0421e-08	1.11111e-09	2.18793e-08	6.60156e-09	1.73611e-11	8.02517e-09
6.6	-8.33333e-05	-0.000114583	4.79167e-05	1.66667e-05	-0.000147917	6.875e-05	5.41667e-05	-0.000160417		0	0	0	0	0	0	0	0		-8.33333e-05	-0.000114583	4.79167e-05	1.66667e-05	-0.000147917	6.875e-05	5.41667e-05	-0.000160417		6.94444e-09	1.31293e-08	2.29601e-09	2.77778e-10	2.18793e-08	4.72656e-09	2.93403e-09	2.57335e-08
6.8	-0.000133333	-6.45833e-05	-5.20833e-05	6.66667e-05	-4.79167e-05	-3.125e-05	0.000104167	3.95833e-05		0	0	0	0	0	0	0	0		-0.000133333	-6.45833e-05	-5.20833e-05	6.66667e-05	-4.79167e-05	-3.125e-05	0.000104167	3.95833e-05		1.77778e-08	4.17101e-09	2.71267e-09	4.44444e-09	2.29601e-09	9.76563e-10	1.08507e-08	1.56684e-09
7	6.66667e-05	3.54167e-05	-2.08333e-06	0.000316667	-4.79167e-05	0.00011875	0.000354167	-1.04167e-05		0	0	0	0	0	0	0	0		6.66667e-05	3.54167e-05	-2.08333e-06	0.000316667	-4.79167e-05	0.00011875	0.000354167	-1.04167e-05		4.44444e-09	1.25434e-09	4.34028e-12	1.00278e-07	2.29601e-09	1.41016e-08	1.25434e-07	1.08507e-10
7.2	1.66667e-05	-0.000114583	-2.08333e-06	-0.000133333	-4.79167e-05	1.875e-05	-0.000145833	0.000189583		0	0	0	0	0	0	0	0		1.66667e-05	-0.000114583	-2.08333e-06	-0.000133333	-4.79167e-05	1.875e-05	-0.000145833	0.000189583		2.77778e-10	1.31293e-08	4.34028e-12	1.77778e-08	2.29601e-09	3.51562e-10	2.12674e-08	3.59418e-08
7.4	0.000216667	-0.000114583	9.79167e-05	-8.33333e-05	-0.000197917	0.00021875	-4.58333e-05	-1.04167e-05		0	0	0	0	0	0	0	0		0.000216667	-0.000114583	9.79167e-05	-8.33333e-05	-0.000197917	0.00021875	-4.58333e-05	-1.04167e-05		4.69444e-08	1.31293e-08	9.58767e-09	6.94444e-09	3.9171e-08	4.78516e-08	2.10069e-09	1.08507e-10
7.6	-8.33333e-05	3.54167e-05	0.000147917	-8.33333e-05	2.08333e-06	1.875e-05	4.16667e-06	-6.04167e-05		0	0	0	0	0	0	0	0		-8.33333e-05	3.54167e-05	0.000147917	-8.33333e-05	2.08333e-06	1.875e-05	4.16667e-06	-6.04167e-05		6.94444e-09	1.25434e-09	2.18793e-08	6.94444e-09	4.34028e-12	3.51562e-10	1.73611e-11	3.65017e-09
7.8	-0.000183333	3.54167e-05	0.000147917	-3.33333e-05	5.20833e-05	6.875e-05	-4.58333e-05	0.000139583		0	0	0	0	0	0	0	0		-0.000183333	3.54167e-05	0.000147917	-3.33333e-05	5.20833e-05	6.875e-05	-4.58333e-05	0.000139583		3.36111e-08	1.25434e-09	2.18793e-08	1.11111e-09	2.71267e-09	4.72656e-09	2.10069e-09	1.94835e-08
8	1.66667e-05	-0.000114583	0.000247917	-3.33333e-05	2.08333e-06	1.875e-05	5.41667e-05	-6.04167e-05		0	0	0	0	0	0	0	0		1.66667e-05	-0.000114583	0.000247917	-3.33333e-05	2.08333e-06	1.875e-05	5.41667e-05	-6.04167e-05		2.77778e-10	1.31293e-08	6.14627e-08	1.11111e-09	4.34028e-12	3.51562e-10	2.93403e-09	3.65017e-09
8.2	-8.33333e-05	-6.45833e-05	0.000297917	-3.33333e-05	2.08333e-06	-0.00013125	0.000154167	-0.000210417		0	0	0	0	0	0	0	0		-8.33333e-05	-6.45833e-05	0.000297917	-3.33333e-05	2.08333e-06	-0.00013125	0.000154167	-0.000210417		6.94444e-09	4.17101e-09	8.87543e-08	1.11111e-09	4.34028e-12	1.72266e-08	2.37674e-08	4.42752e-08
8.4	0.000116667	-1.45833e-05	0.000447917	1.66667e-05	2.08333e-06	-3.125e-05	-0.000145833	3.95833e-05		0	0	0	0	0	0	0	0		0.000116667	-1.45833e-05	0.000447917	1.66667e-05	2.08333e-06	-3.125e-05	-0.000145833	3.95833e-05		1.36111e-08	2.12674e-10	2.00629e-07	2.77778e-10	4.34028e-12	9.76563e-10	2.12674e-08	1.56684e-09
8.6	1.66667e-05	3.54167e-05	0.000447917	1.66667e-05	-4.79167e-05	-0.00018125	-0.000145833	-1.04167e-05		0	0	0	0	0	0	0	0		1.66667e-05	3.54167e-05	0.000447917	1.66667e-05	-4.79167e-05	-0.00018125	-0.000145833	-1.04167e-05		2.77778e-10	1.25434e-09	2.00629e-07	2.77778e-10	2.29601e-09	3.28516e-08	2.12674e-08	1.08507e-10
8.8	-0.000183333	-0.000214583	0.000247917	0.000116667	5.20833e-05	1.875e-05	-4.58333e-05	0.000289583		0	0	0	0	0	0	0	0		-0.000183333	-0.000214583	0.000247917	0.000116667	5.20833e-05	1.875e-05	-4.58333e-05	0.000289583		3.36111e-08	4.6046e-08	6.14627e-08	1.36111e-08	2.71267e-09	3.51562e-10	2.10069e-09	8.38585e-08
9	-3.33333e-05	-6.45833e-05	0.000247917	1.66667e-05	2.08333e-06	-0.00018125	4.16667e-06	-6.04167e-05		0	0	0	0	0	0	0	0		-3.33333e-05	-6.45833e-05	0.000247917	1.66667e-05	2.08333e-06	-0.00018125	4.16667e-06	-6.04167e-05		1.11111e-09	4.17101e-09	6.14627e-08	2.77778e-10	4.34028e-12	3.28516e-08	1.73611e-11	3.65017e-09
9.2	-8.33333e-05	-0.000114583	0.000197917	-0.000133333	2.08333e-06	6.875e-05	4.16667e-06	-6.04167e-05		0	0	0	0	0	0	0	0		-8.33333e-05	-0.000114583	0.000197917	-0.000133333	2.08333e-06	6.875e-05	4.16667e-06	-6.04167e-05		6.94444e-09	1.31293e-08	3.9171e-08	1.77778e-08	4.34028e-12	4.72656e-09	1.73611e-11	3.65017e-09
9.4	6.66667e-05	3.54167e-05	0.000247917	-8.33333e-05	5.20833e-05	-8.125e-05	0.000104167	0.000139583		0	0	0	0	0	0	0	0		6.66667e-05	3.54167e-05	0.000247917	-8.33333e-05	5.20833e-05	-8.125e-05	0.000104167	0.000139583		4.44444e-09	1.25434e-09	6.14627e-08	6.94444e-09	2.71267e-09	6.60156e-09	1.08507e-08	1.94835e-08
9.6	-3.33333e-05	-0.000214583	0.000197917	-8.33333e-05	0.000102083	0.00011875	0.000154167	-6.04167e-05		0	0	0	0	0	0	0	0		-3.33333e-05	-0.000214583	0.000197917	-8.33333e-05	0.000102083	0.00011875	0.000154167	-6.04167e-05		1.11111e-09	4.6046e-08	3.9171e-08	6.94444e-09	1.0421e-08	1.41016e-08	2.37674e-08	3.65017e-09
9.8	1.66667e-05	-6.45833e-05	0.000197917	-3.33333e-05	5.20833e-05	-3.125e-05	-0.000195833	-0.000160417		0	0	0	0	0	0	0	0		1.66667e-05	-6.45833e-05	0.000197917	-3.33333e-05	5.20833e-05	-3.125e-05	-0.000195833	-0.000160417		2.77778e-10	4.17101e-09	3.9171e-08	1.11111e-09	2.71267e-09	9.76563e-10	3.83507e-08	2.57335e-08
10	-8.33333e-05	-6.45833e-05	0.000147917	-3.33333e-05	0.000202083	0.00011875	-4.58333e-05	3.95833e-05		0	0	0	0	0	0	0	0		-8.33333e-05	-6.45833e-05	0.000147917	-3.33333e-05	0.000202083	0.00011875	-4.58333e-05	3.95833e-05		6.94444e-09	4.17101e-09	2.18793e-08	1.11111e-09	4.08377e-08	1.41016e-08	2.10069e-09	1.56684e-09
10.2	-0.000183333	8.54167e-05	0.000147917	-8.33333e-05	5.20833e-05	6.875e-05	-4.58333e-05	-1.04167e-05		0	0	0	0	0	0	0	0		-0.000183333	8.54167e-05	0.000147917	-8.33333e-05	5.20833e-05	6.875e-05	-4.58333e-05	-1.04167e-05		3.36111e-08	7.29601e-09	2.18793e-08	6.94444e-09	2.71267e-09	4.72656e-09	2.10069e-09	1.08507e-10
10.4	1.66667e-05	-0.000164583	0.000147917	-3.33333e-05	-0.000147917	0.00026875	-4.58333e-05	0.000239583		0	0	0	0	0	0	0	0		1.66667e-05	-0.000164583	0.000147917	-3.33333e-05	-0.000147917	0.00026875	-4.58333e-05	0.000239583		2.77778e-10	2.70877e-08	2.18793e-08	1.11111e-09	2.18793e-08	7.22266e-08	2.10069e-09	5.74002e-08
10.6	-8.33333e-05	0.0137354	0.000147917	6.66667e-05	-0.000147917	6.875e-05	4.16667e-06	-1.04167e-05		0	0	0	0	0	0	0	0		-8.33333e-05	0.0137354	0.000147917	6.66667e-05	-0.000147917	6.875e-05	4.16667e-06	-1.04167e-05		6.94444e-09	0.000188662	2.18793e-08	4.44444e-09	2.18793e-08	4.72656e-09	1.73611e-11	1.08507e-10
10.8	0.00841667	0.0145854	0.000147917	0.000116667	-0.000197917	-8.125e-05	0.000154167	-6.04167e-05		0	0.0318	0	0	0	0	0	0		0.00841667	-0.0172146	0.000147917	0.000116667	-0.000197917	-8.125e-05	0.000154167	-6.04167e-05		7.08403e-05	0.000296342	2.18793e-08	1.36111e-08	3.9171e-08	6.60156e-09	2.37674e-08	3.65017e-09
11	0.0115667	0.0161854	0.00574792	-0.000133333	-0.000197917	-3.125e-05	-9.58333e-05	8.95833e-05		0	0.029	0	0	0	0	0	0		0.0115667	-0.0128146	0.00574792	-0.000133333	-0.000197917	-3.125e-05	-9.58333e-05	8.95833e-05		0.000133788	0.000164214	3.30385e-05	1.77778e-08	3.9171e-08	9.76563e-10	9.18403e-09	8.02517e-09
11.2	0.0124667	0.0204354	0.0185479	-0.000183333	-0.000147917	-0.00013125	-0.000145833	-1.04167e-05		0.033	0.0698	0	0	0	0	0	0		-0.0205333	-0.0493646	0.0185479	-0.000183333	-0.000147917	-0.00013125	-0.000145833	-1.04167e-05		0.000421618	0.00243686	0.000344025	3.36111e-08	2.18793e-08	1.72266e-08	2.12674e-08	1.08507e-10
11.4	0.0140667	0.0311854	0.0208479	1.66667e-05	-0.000147917	-3.125e-05	4.16667e-06	-0.000160417		0.0579	0.0766	0.0371	0	0	0	0	0		-0.0438333	-0.0454146	-0.0162521	1.66667e-05	-0.000147917	-3.125e-05	4.16667e-06	-0.000160417		0.00192136	0.00206248	0.00026413	2.77778e-10	2.18793e-08	9.76563e-10	1.73611e-11	2.57335e-08
11.6	0.0169667	0.0344854	0.0205979	0.00571667	-9.79167e-05	-0.00018125	4.16667e-06	3.95833e-05		0.0625	0.0777	0.0318	0	0	0	0	0		-0.0455333	-0.0432146	-0.0112021	0.00571667	-9.79167e-05	-0.00018125	4.16667e-06	3.95833e-05		0.00207328	0.0018675	0.000125487	3.26803e-05	9.58767e-09	3.28516e-08	1.73611e-11	1.56684e-09
11.8	0.0192667	0.0433354	0.0209979	0.00621667	0.00110208	1.875e-05	-4.58333e-05	-1.04167e-05		0.0644	0.0803	0.0604	0	0	0	0	0		-0.0451333	-0.0369646	-0.0394021	0.00621667	0.00110208	1.875e-05	-4.58333e-05	-1.04167e-05		0.00203702	0.00136638	0.00155252	3.86469e-05	1.21459e-06	3.51562e-10	2.10069e-09	1.08507e-10
12	0.0206667	0.0418854	0.0242979	0.0123167	0.00745208	0.0118687	0.000104167	0.000139583		0.0723	0.085	0.043	0.0174	0	0	0	0		-0.0516333	-0.0431146	-0.0187021	-0.00508333	0.00745208	0.0118687	0.000104167	0.000139583		0.002666	0.00185887	0.000349768	2.58403e-05	5.55335e-05	0.000140867	1.08507e-08	1.94835e-08
12.2	0.0227667	0.0426854	0.0269479	0.0175167	0.00855208	0.0162688	0.000104167	-6.04167e-05		0.0723	0.0858	0.0443	0.0208	0	0.0115	0	0		-0.0495333	-0.0431146	-0.0173521	-0.00328333	0.00855208	0.00476875	0.000104167	-6.04167e-05		0.00245355	0.00185887	0.000301095	1.07803e-05	7.31381e-05	2.2741e-05	1.08507e-08	3.65017e-09
12.4	0.0370167	0.0522854	0.0327979	0.0184667	0.0101521	0.0425188	0.000104167	-0.000110417		0.0741	0.0875	0.0851	0.0175	0.0154	0.0245	0	0		-0.0370833	-0.0352146	-0.0523021	0.000966667	-0.00524792	0.0180188	0.000104167	-0.000110417		0.00137517	0.00124007	0.00273551	9.34444e-07	2.75406e-05	0.000324675	1.08507e-08	1.21918e-08
12.6	0.0513167	0.0502354	0.0474979	0.0211167	0.0144521	0.0484187	0.00265417	0.000189583		0.0765	0.0866	0.0801	0.0349	0.0124	0.0287	0.0106	0		-0.0251833	-0.0363646	-0.0326021	-0.0137833	0.00205208	0.0197187	-0.00794583	0.000189583		0.0006342	0.00132238	0.0010629	0.00018998	4.21105e-06	0.000388829	6.31363e-05	3.59418e-08
12.8	0.0504667	0.0502854	0.0529479	0.0242667	0.0290021	0.0415688	0.00795417	3.95833e-05		0.0784	0.0872	0.0792	0.026	0.0104	0.0328	0.0059	0		-0.0279333	-0.0369146	-0.0262521	-0.00173333	0.0186021	0.00876875	0.00205417	3.95833e-05		0.000780271	0.00136269	0.000689172	3.00444e-06	0.000346038	7.6891e-05	4.2196e-06	1.56684e-09
13	0.0553667	0.0600354	0.0574979	0.0306667	0.0300021	0.0506187	0.0110042	8.95833e-05		0.0782	0.0877	0.0797	0.0263	0.0187	0.0369	0.0106	0		-0.0228333	-0.0276646	-0.0222021	0.00436667	0.0113021	0.0137187	0.000404167	8.95833e-05		0.000521361	0.000765329	0.000492933	1.90678e-05	0.000127737	0.000188204	1.63351e-07	8.02517e-09
13.2	0.0586167	0.0664354	0.0571479	0.0410167	0.0310021	0.0502187	0.0187042	0.00468958		0.0785	0.087	0.0804	0.0267	0.019	0.0358	0.0226	0		-0.0198833	-0.0205646	-0.0232521	0.0143167	0.0120021	0.0144188	-0.00389583	0.00468958		0.000395347	0.000422902	0.000540659	0.000204967	0.00014405	0.0002079	1.51775e-05	2.19922e-05
13.4	0.0588667	0.0807854	0.0616979	0.0453167	0.0312521	0.0530187	0.0261042	0.00548958		0.081	0.0863	0.0837	0.0437	0.0315	0.0393	0.022	0		-0.0221333	-0.00551458	-0.0220021	0.00161667	-0.000247917	0.0137187	0.00410417	0.00548958		0.000489884	3.04106e-05	0.000484092	2.61361e-06	6.14627e-08	0.000188204	1.68442e-05	3.01355e-05
13.6	0.0640167	0.0999354	0.0680979	0.0525667	0.0360521	0.0475187	0.0272042	0.00668958		0.0814	0.0858	0.0822	0.0632	0.0332	0.0395	0.024	0.0066		-0.0173833	0.0141354	-0.0141021	-0.0106333	0.00285208	0.00801875	0.00320417	8.95833e-05		0.00030218	0.00019981	0.000198869	0.000113068	8.13438e-06	6.43004e-05	1.02667e-05	8.02517e-09
13.8	0.0648667	0.103835	0.0648979	0.0567167	0.0328521	0.0536188	0.0282042	0.00648958		0.081	0.0856	0.082	0.0614	0.0366	0.038	0.0259	0.0061		-0.0161333	0.0182354	-0.0171021	-0.00468333	-0.00374792	0.0156188	0.00230417	0.000389583		0.000260284	0.00033253	0.000292481	2.19336e-05	1.40469e-05	0.000243945	5.30918e-06	1.51775e-07
14	0.0703667	0.104885	0.0633479	0.0576667	0.0339021	0.0509688	0.0254042	0.00568958		0.0803	0.0862	0.0819	0.0576	0.0357	0.0386	0.0261	0.0084		-0.00993333	0.0186854	-0.0185521	6.66667e-05	-0.00179792	0.0123687	-0.000695833	-0.00271042		9.86711e-05	0.000349145	0.00034418	4.44444e-09	3.2325e-06	0.000152986	4.84184e-07	7.34636e-06
14.2	0.0714667	0.0901354	0.0626479	0.0662667	0.0311521	0.0590688	0.0255042	0.00778958		0.0802	0.0867	0.082	0.0537	0.0363	0.0391	0.0305	0.0112		-0.00873333	0.00343542	-0.0193521	0.0125667	-0.00514792	0.0199688	-0.00499583	-0.00341042		7.62711e-05	1.18021e-05	0.000374503	0.000157921	2.6501e-05	0.000398751	2.49584e-05	1.16309e-05
14.4	0.0730167	0.0811354	0.0613979	0.0728667	0.0369521	0.0615688	0.0277042	0.00593958		0.0796	0.0873	0.0817	0.055	0.0357	0.0384	0.0274	0.0106		-0.00658333	-0.00616458	-0.0203021	0.0178667	0.00125208	0.0231688	0.000304167	-0.00466042		4.33403e-05	3.80021e-05	0.000412175	0.000319218	1.56771e-06	0.000536791	9.25174e-08	2.17195e-05
14.6	0.0664667	0.0796854	0.0649979	0.0659667	0.0374521	0.0549688	0.0339542	0.00478958		0.0792	0.0874	0.0822	0.0574	0.0364	0.0368	0.029	0.0106		-0.0127333	-0.00771458	-0.0172021	0.00856667	0.00105208	0.0181688	0.00495417	-0.00581042		0.000162138	5.95148e-05	0.000295912	7.33878e-05	1.10688e-06	0.000330103	2.45438e-05	3.37609e-05
14.8	0.0705167	0.0702354	0.0713979	0.0628667	0.0395521	0.0575688	0.0326042	0.0101896		0.0791	0.087	0.0827	0.0573	0.037	0.0368	0.0294	0.0123		-0.00858333	-0.0167646	-0.0113021	0.00556667	0.00255208	0.0207688	0.00320417	-0.00211042		7.36736e-05	0.000281051	0.000127737	3.09878e-05	6.51313e-06	0.000431341	1.02667e-05	4.45386e-06
15	0.0714167	0.0808354	0.0706479	0.0600167	0.0395521	0.0593187	0.0361042	0.0113896		0.0786	0.0867	0.083	0.0557	0.0382	0.0373	0.0314	0.011		-0.00718333	-0.00586458	-0.0123521	0.00431667	0.00135208	0.0220187	0.00470417	0.000389583		5.16003e-05	3.43933e-05	0.000152574	1.86336e-05	1.82813e-06	0.000484825	2.21292e-05	1.51775e-07
15.2	0.0700167	0.0779354	0.0666979	0.0634667	0.0364521	0.0613687	0.0398542	0.00853958		0.0779	0.0863	0.0826	0.0547	0.0392	0.0375	0.0315	0.0105		-0.00788333	-0.00836458	-0.0159021	0.00876667	-0.00274792	0.0238688	0.00835417	-0.00196042		6.21469e-05	6.99663e-05	0.000252876	7.68544e-05	7.55105e-06	0.000569717	6.97921e-05	3.84323e-06
15.4	0.0714167	0.0752854	0.0634979	0.0632667	0.0340521	0.0527688	0.0355542	0.00673958		0.0771	0.0858	0.082	0.0554	0.0395	0.0372	0.0332	0.0119		-0.00568333	-0.0105146	-0.0185021	0.00786667	-0.00544792	0.0155688	0.00235417	-0.00516042		3.23003e-05	0.000110556	0.000342327	6.18844e-05	2.96798e-05	0.000242386	5.5421e-06	2.66299e-05
15.6	0.0734667	0.0771354	0.0663979	0.0655667	0.0370021	0.0539187	0.0368042	0.00553958		0.0768	0.0848	0.0816	0.0572	0.0399	0.0373	0.0332	0.0125		-0.00333333	-0.00766458	-0.0152021	0.00836667	-0.00289792	0.0166187	0.00360417	-0.00696042		1.11111e-05	5.87458e-05	0.000231103	7.00011e-05	8.39792e-06	0.000276183	1.299e-05	4.84474e-05
15.8	0.0733167	0.0753854	0.0696979	0.0672667	0.0391521	0.0608687	0.0399042	0.00863958		0.0767	0.0839	0.0808	0.0581	0.0402	0.0381	0.033	0.013		-0.00338333	-0.00851458	-0.0111021	0.00916667	-0.00104792	0.0227687	0.00690417	-0.00436042		1.14469e-05	7.24981e-05	0.000123256	8.40278e-05	1.09813e-06	0.000518416	4.76675e-05	1.90132e-05
16	0.0724667	0.0785854	0.0715479	0.0697667	0.0365521	0.0568687	0.0390542	0.0102896		0.0767	0.083	0.08	0.0583	0.0405	0.0391	0.0331	0.0127		-0.00423333	-0.00441458	-0.00845208	0.0114667	-0.00394792	0.0177687	0.00595417	-0.00241042		1.79211e-05	1.94885e-05	7.14377e-05	0.000131484	1.5586e-05	0.000315728	3.54521e-05	5.81011e-06
16.2	0.0722667	0.0750354	0.0678979	0.0679667	0.0357021	0.0653688	0.0362542	0.0115396		0.0767	0.082	0.0795	0.0581	0.0403	0.0399	0.0337	0.0119		-0.00443333	-0.00696458	-0.0116021	0.00986667	-0.00459792	0.0254688	0.00255417	-0.000360417		1.96544e-05	4.85054e-05	0.000134608	9.73511e-05	2.11408e-05	0.000648657	6.52377e-06	1.299e-07
16.4	0.0714167	0.0798354	0.0635979	0.0665167	0.0343521	0.0634688	0.0396042	0.0226396		0.0764	0.0816	0.0792	0.0579	0.0399	0.0406	0.034	0.0176		-0.00498333	-0.00176458	-0.0156021	0.00861667	-0.00554792	0.0228688	0.00560417	0.00503958		2.48336e-05	3.11375e-06	0.000243425	7.42469e-05	3.07794e-05	0.00052298	3.14067e-05	2.53974e-05
16.6	0.0757167	0.0795854	0.0657979	0.0678667	0.0404021	0.0534188	0.0397542	0.0157896		0.0761	0.081	0.079	0.0576	0.0398	0.0414	0.0344	0.0173		-0.000383333	-0.00141458	-0.0132021	0.0102667	0.000602083	0.0120188	0.00535417	-0.00151042		1.46944e-07	2.00105e-06	0.000174295	0.000105404	3.62504e-07	0.00014445	2.86671e-05	2.28136e-06
16.8	0.0736167	0.0795354	0.0666979	0.0710667	0.0411521	0.0536688	0.0440042	0.0108396		0.0753	0.0807	0.0788	0.0575	0.0406	0.0421	0.036	0.0164		-0.00168333	-0.00116458	-0.0121021	0.0135667	0.000552083	0.0115688	0.00800417	-0.00556042		2.83361e-06	1.35625e-06	0.00014646	0.000184054	3.04796e-07	0.000133836	6.40667e-05	3.09182e-05
17	0.0707167	0.0790354	0.0704979	0.0731667	0.0393521	0.0560187	0.0465042	0.0157396		0.0748	0.0807	0.0785	0.0572	0.0417	0.0426	0.0371	0.0179		-0.00408333	-0.00166458	-0.00800208	0.0159667	-0.00234792	0.0134188	0.00940417	-0.00216042		1.66736e-05	2.77084e-06	6.40333e-05	0.000254934	5.51271e-06	0.000180063	8.84384e-05	4.6674e-06
17.2	0.0716167	0.0801354	0.0677979	0.0695667	0.0405521	0.0577187	0.0456542	0.0189896		0.0745	0.0809	0.0783	0.0569	0.0428	0.0435	0.0367	0.0197		-0.00288333	-0.000764583	-0.0105021	0.0126667	-0.00224792	0.0142188	0.00895417	-0.000710417		8.31361e-06	5.84588e-07	0.000110294	0.000160444	5.05313e-06	0.000202173	8.01771e-05	5.04692e-07
17.4	0.0689167	0.0817354	0.0684479	0.0669167	0.0388521	0.0670687	0.0424042	0.0181396		0.0745	0.0811	0.0782	0.0564	0.0429	0.0441	0.0358	0.0251		-0.00558333	0.000635417	-0.00975208	0.0105167	-0.00404792	0.0229687	0.00660417	-0.00696042		3.11736e-05	4.03754e-07	9.51031e-05	0.0001106	1.63856e-05	0.000527563	4.3615e-05	4.84474e-05
17.6	0.0725167	0.0819354	0.0667979	0.0706667	0.0404021	0.0629187	0.0507042	0.0152896		0.0749	0.0809	0.0784	0.0561	0.0423	0.0443	0.0354	0.0279		-0.00238333	0.00103542	-0.0116021	0.0145667	-0.00189792	0.0186187	0.0153042	-0.0126104		5.68028e-06	1.07209e-06	0.000134608	0.000212188	3.60209e-06	0.000346658	0.000234218	0.000159023
17.8	0.0732167	0.0800354	0.0713979	0.0671667	0.0387521	0.0644688	0.0488542	0.0302396		0.0748	0.0808	0.0786	0.0562	0.0419	0.0441	0.0359	0.0261		-0.00158333	-0.000764583	-0.00720208	0.0109667	-0.00314792	0.0203688	0.0129542	0.00413958		2.50694e-06	5.84588e-07	5.187e-05	0.000120268	9.90938e-06	0.000414886	0.00016781	1.71362e-05
18	0.0714667	0.0822354	0.0672979	0.0736167	0.0403021	0.0644187	0.0427042	0.0295396		0.0744	0.0808	0.0786	0.0562	0.0418	0.0436	0.0367	0.0246		-0.00293333	0.00143542	-0.0113021	0.0174167	-0.00149792	0.0208187	0.00600417	0.00493958		8.60444e-06	2.06042e-06	0.000127737	0.00030334	2.24375e-06	0.00043342	3.605e-05	2.43995e-05
18.2	0.0744167	0.0857354	0.0689479	0.0713667	0.0407521	0.0662188	0.0434042	0.0227396		0.074	0.0806	0.0787	0.0562	0.0419	0.0433	0.0383	0.0246		0.000416667	0.00513542	-0.00975208	0.0151667	-0.00114792	0.0229188	0.00510417	-0.00186042		1.73611e-07	2.63725e-05	9.51031e-05	0.000230028	1.31771e-06	0.000525269	2.60525e-05	3.46115e-06
18.4	0.0709667	0.0840354	0.0657979	0.0725167	0.0384021	0.0644187	0.0453542	0.0191896		0.0736	0.0801	0.0784	0.0564	0.0423	0.0433	0.0398	0.0265		-0.00263333	0.00393542	-0.0126021	0.0161167	-0.00389792	0.0211187	0.00555417	-0.00731042		6.93444e-06	1.54875e-05	0.000158813	0.000259747	1.51938e-05	0.000446002	3.08488e-05	5.34422e-05
18.6	0.0699167	0.0804854	0.0621979	0.0687167	0.0356521	0.0622187	0.0447542	0.0221396		0.0734	0.0797	0.0777	0.0565	0.0431	0.0437	0.0403	0.0283		-0.00348333	0.000785417	-0.0155021	0.0122167	-0.00744792	0.0185187	0.00445417	-0.00616042		1.21336e-05	6.16879e-07	0.000240315	0.000149247	5.54715e-05	0.000342944	1.98396e-05	3.79507e-05
18.8	0.0726667	0.0798854	0.0668979	0.0681667	0.0384521	0.0637687	0.0389542	0.0173396		0.0733	0.0794	0.0771	0.0566	0.0439	0.0443	0.0404	0.0291		-0.000633333	0.000485417	-0.0102021	0.0115667	-0.00544792	0.0194687	-0.00144583	-0.0117604		4.01111e-07	2.35629e-07	0.000104083	0.000133788	2.96798e-05	0.000379032	2.09043e-06	0.000138307
19	0.0710667	0.0833354	0.0696979	0.0681167	0.0408521	0.0702688	0.0414542	0.0156396		0.0732	0.079	0.0767	0.0565	0.0442	0.0453	0.04	0.0322		-0.00213333	0.00433542	-0.00700208	0.0116167	-0.00334792	0.0249688	0.00145417	-0.0165604		4.55111e-06	1.87958e-05	4.90292e-05	0.000134947	1.12085e-05	0.000623438	2.1146e-06	0.000274247
19.2	0.0712667	0.0774854	0.0698479	0.0731667	0.0425521	0.0720688	0.0438542	0.0322396		0.073	0.0788	0.0767	0.0564	0.044	0.046	0.0401	0.0343		-0.00173333	-0.00131458	-0.00685208	0.0167667	-0.00144792	0.0260688	0.00375417	-0.00206042		3.00444e-06	1.72813e-06	4.6951e-05	0.000281121	2.09646e-06	0.00067958	1.40938e-05	4.24532e-06
19.4	0.0710167	0.0795854	0.0655479	0.0706167	0.0432021	0.0730688	0.0456042	0.0192896		0.0731	0.0787	0.0768	0.056	0.0436	0.0458	0.0399	0.0351		-0.00208333	0.000885417	-0.0112521	0.0146167	-0.000397917	0.0272688	0.00570417	-0.0158104		4.34028e-06	7.83963e-07	0.000126609	0.000213647	1.58338e-07	0.000743585	3.25375e-05	0.000249969
19.6	0.0704167	0.0797354	0.0660979	0.0701167	0.0397021	0.0805188	0.0464042	0.0155396		0.0731	0.0786	0.0769	0.0557	0.0434	0.0452	0.0398	0.0345		-0.00268333	0.00113542	-0.0108021	0.0144167	-0.00369792	0.0353188	0.00660417	-0.0189604		7.20028e-06	1.28917e-06	0.000116685	0.00020784	1.36746e-05	0.00124741	4.3615e-05	0.000359497
19.8	0.0712667	0.0783854	0.0611479	0.0692667	0.0420021	0.0843688	0.0396542	0.0165896		0.0731	0.0786	0.0769	0.0558	0.0435	0.0447	0.0407	0.0332		-0.00183333	-0.000214583	-0.0157521	0.0134667	-0.00149792	0.0396688	-0.00104583	-0.0166104		3.36111e-06	4.6046e-08	0.000248128	0.000181351	2.24375e-06	0.00157361	1.09377e-06	0.000275906
20	0.0674167	0.0807354	0.0610979	0.0689167	0.0445521	0.0759688	0.0454542	0.0283896		0.073	0.0787	0.0768	0.0565	0.0438	0.0449	0.0415	0.0323		-0.00558333	0.00203542	-0.0157021	0.0124167	0.000752083	0.0310687	0.00395417	-0.00391042		3.11736e-05	4.14292e-06	0.000246555	0.000154174	5.65629e-07	0.000965267	1.56354e-05	1.52914e-05
20.2	0.0704667	0.0800354	0.0663479	0.0648167	0.0413021	0.0701187	0.0417542	0.0281896		0.0728	0.0786	0.0766	0.0572	0.0442	0.0459	0.0418	0.0328		-0.00233333	0.00143542	-0.0102521	0.00761667	-0.00289792	0.0242187	-4.58333e-05	-0.00461042		5.44444e-06	2.06042e-06	0.000105105	5.80136e-05	8.39792e-06	0.000586548	2.10069e-09	2.12559e-05
20.4	0.0689167	0.0807854	0.0690979	0.0656667	0.0396021	0.0663688	0.0463042	0.0243896		0.0725	0.0783	0.0764	0.0578	0.0446	0.0472	0.0421	0.0332		-0.00358333	0.00248542	-0.00730208	0.00786667	-0.00499792	0.0191688	0.00420417	-0.00881042		1.28403e-05	6.1773e-06	5.33204e-05	6.18844e-05	2.49792e-05	0.000367441	1.7675e-05	7.76234e-05
20.6	0.0704667	0.0790354	0.0686979	0.0707667	0.0400021	0.0624188	0.0455042	0.0203396		0.072	0.0779	0.0762	0.0581	0.0444	0.0482	0.0428	0.033		-0.00153333	0.00113542	-0.00750208	0.0126667	-0.00439792	0.0142188	0.00270417	-0.0126604		2.35111e-06	1.28917e-06	5.62813e-05	0.000160444	1.93417e-05	0.000202173	7.31252e-06	0.000160286
20.8	0.0707667	0.0776354	0.0640479	0.0757667	0.0426021	0.0648187	0.0455542	0.0245396		0.0714	0.0776	0.0761	0.0579	0.0441	0.0484	0.043	0.0336		-0.000633333	3.54167e-05	-0.0120521	0.0178667	-0.00149792	0.0164187	0.00255417	-0.00906042		4.01111e-07	1.25434e-09	0.000145253	0.000319218	2.24375e-06	0.000269575	6.52377e-06	8.20912e-05
21	0.0722167	0.0821854	0.0617479	0.0734167	0.0405021	0.0587188	0.0419542	0.0279896		0.0709	0.0773	0.0759	0.0573	0.044	0.048	0.0427	0.0354		0.00131667	0.00488542	-0.0141521	0.0161167	-0.00349792	0.0107187	-0.000745833	-0.00741042		1.73361e-06	2.38673e-05	0.000200281	0.000259747	1.22354e-05	0.000114892	5.56267e-07	5.49143e-05
21.2	0.0702167	0.0778854	0.0576979	0.0721667	0.0431521	0.0658688	0.0458542	0.0283896		0.0705	0.0769	0.0756	0.0566	0.0443	0.0472	0.0428	0.037		-0.000283333	0.000985417	-0.0179021	0.0155667	-0.00114792	0.0186688	0.00305417	-0.00861042		8.02778e-08	9.71046e-07	0.000320485	0.000242321	1.31771e-06	0.000348522	9.32793e-06	7.41393e-05
21.4	0.0678667	0.0782854	0.0620979	0.0670167	0.0404021	0.0697687	0.0420542	0.0335396		0.0704	0.0765	0.0752	0.0561	0.0448	0.0464	0.0433	0.0379		-0.00253333	0.00178542	-0.0131021	0.0109167	-0.00439792	0.0233687	-0.00124583	-0.00436042		6.41778e-06	3.18771e-06	0.000171665	0.000119174	1.93417e-05	0.000546098	1.5521e-06	1.90132e-05
21.6	0.0696667	0.0801854	0.0661979	0.0665167	0.0404021	0.0759187	0.0423042	0.0315896		0.0703	0.0759	0.0747	0.056	0.0457	0.0461	0.0435	0.0383		-0.000633333	0.00428542	-0.00850208	0.0105167	-0.00529792	0.0298187	-0.00119583	-0.00671042		4.01111e-07	1.83648e-05	7.22854e-05	0.0001106	2.80679e-05	0.000889158	1.43002e-06	4.50297e-05
21.8	0.0707167	0.0798854	0.0676479	0.0726667	0.0373521	0.0711188	0.0436042	0.0322896		0.0702	0.0755	0.0741	0.0561	0.046	0.0465	0.0432	0.0378		0.000516667	0.00438542	-0.00645208	0.0165667	-0.00864792	0.0246188	0.000404167	-0.00551042		2.66944e-07	1.92319e-05	4.16294e-05	0.000274454	7.47865e-05	0.000606083	1.63351e-07	3.03647e-05
22	0.0710667	0.0750854	0.0644479	0.0708667	0.0405021	0.0637188	0.0465542	0.0315896		0.0698	0.0752	0.0737	0.0564	0.0456	0.0473	0.0429	0.0375		0.00126667	-0.000114583	-0.00925208	0.0144667	-0.00509792	0.0164188	0.00365417	-0.00591042		1.60444e-06	1.31293e-08	8.5601e-05	0.000209284	2.59888e-05	0.000269575	1.33529e-05	3.4933e-05
22.2	0.0701167	0.0768854	0.0594979	0.0683667	0.0393021	0.0649688	0.0422042	0.0279896		0.0694	0.075	0.0735	0.0567	0.045	0.0476	0.043	0.0381		0.000716667	0.00188542	-0.0140021	0.0116667	-0.00569792	0.0173688	-0.000795833	-0.0101104		5.13611e-07	3.5548e-06	0.000196058	0.000136111	3.24663e-05	0.000301673	6.33351e-07	0.000102221
22.4	0.0674167	0.0801354	0.0594979	0.0642667	0.0423021	0.0629688	0.0411542	0.0235896		0.069	0.0747	0.0735	0.0567	0.0445	0.0471	0.0431	0.0376		-0.00158333	0.00543542	-0.0140021	0.00756667	-0.00219792	0.0158688	-0.00194583	-0.0140104		2.50694e-06	2.95438e-05	0.000196058	5.72544e-05	4.83084e-06	0.000251817	3.78627e-06	0.000196292
22.6	0.0686667	0.0806854	0.0611479	0.0611167	0.0429021	0.0647687	0.0430542	0.0268396		0.0685	0.0742	0.0734	0.0566	0.0444	0.0463	0.0431	0.0343		0.000166667	0.00648542	-0.0122521	0.00451667	-0.00149792	0.0184687	-4.58333e-05	-0.00746042		2.77778e-08	4.20606e-05	0.000150114	2.04003e-05	2.24375e-06	0.000341095	2.10069e-09	5.56578e-05
22.8	0.0664167	0.0792854	0.0637479	0.0652667	0.0394021	0.0612188	0.0425542	0.0332396		0.068	0.0738	0.0731	0.0566	0.0443	0.0457	0.0434	0.0331		-0.00158333	0.00548542	-0.00935208	0.00866667	-0.00489792	0.0155188	-0.000845833	0.000139583		2.50694e-06	3.00898e-05	8.74615e-05	7.51111e-05	2.39896e-05	0.000240832	7.15434e-07	1.94835e-08
23	0.0683667	0.0776354	0.0686479	0.0703667	0.0393021	0.0668187	0.0417542	0.0351896		0.0676	0.0735	0.0725	0.0568	0.0442	0.0456	0.0443	0.0336		0.000766667	0.00413542	-0.00385208	0.0135667	-0.00489792	0.0212187	-0.00254583	0.00158958		5.87778e-07	1.71017e-05	1.48385e-05	0.000184054	2.39896e-05	0.000450235	6.48127e-06	2.52678e-06
23.2	0.0674167	0.0772354	0.0703479	0.0694667	0.0358021	0.0663688	0.0480042	0.0364896		0.0672	0.0731	0.0717	0.0569	0.0438	0.0464	0.045	0.034		0.000216667	0.00413542	-0.00135208	0.0125667	-0.00799792	0.0199688	0.00300417	0.00248958		4.69444e-08	1.71017e-05	1.82813e-06	0.000157921	6.39667e-05	0.000398751	9.02502e-06	6.19803e-06
23.4	0.0707667	0.0806354	0.0630979	0.0720167	0.0399521	0.0658187	0.0467042	0.0336396		0.0668	0.0727	0.0711	0.0568	0.0436	0.0479	0.0455	0.0344		0.00396667	0.00793542	-0.00800208	0.0152167	-0.00364792	0.0179187	0.00120417	-0.000760417		1.57344e-05	6.29708e-05	6.40333e-05	0.000231547	1.33073e-05	0.000321082	1.45002e-06	5.78234e-07
23.6	0.0676167	0.0766854	0.0600479	0.0709167	0.0482521	0.0697187	0.0455042	0.0299896		0.0665	0.0725	0.0707	0.0564	0.0441	0.049	0.0455	0.0352		0.00111667	0.00418542	-0.0106521	0.0145167	0.00415208	0.0207187	4.16667e-06	-0.00521042		1.24694e-06	1.75177e-05	0.000113467	0.000210734	1.72398e-05	0.000429267	1.73611e-11	2.71484e-05
23.8	0.0669667	0.0775854	0.0579479	0.0652667	0.0439521	0.0713687	0.0449542	0.0317896		0.0663	0.0722	0.0707	0.0559	0.045	0.0494	0.0447	0.0368		0.000666667	0.00538542	-0.0127521	0.00936667	-0.00104792	0.0219687	0.000254167	-0.00501042		4.44444e-07	2.90027e-05	0.000162616	8.77344e-05	1.09813e-06	0.000482626	6.46007e-08	2.51043e-05
24	0.0682167	0.0736854	0.0579979	0.0705167	0.0423021	0.0694688	0.0381042	0.0286396		0.0661	0.0718	0.0707	0.0553	0.0452	0.0488	0.0433	0.039		0.00211667	0.00188542	-0.0127021	0.0152167	-0.00289792	0.0206688	-0.00519583	-0.0103604		4.48028e-06	3.5548e-06	0.000161343	0.000231547	8.39792e-06	0.000427197	2.69967e-05	0.000107338
24.2	0.0658667	0.0739854	0.0611979	0.0680167	0.0413521	0.0716188	0.0401542	0.0363396		0.0659	0.0716	0.0707	0.0548	0.0447	0.0476	0.0421	0.0421		-3.33333e-05	0.00238542	-0.00950208	0.0132167	-0.00334792	0.0240188	-0.00194583	-0.00576042		1.11111e-09	5.69021e-06	9.02896e-05	0.00017468	1.12085e-05	0.0005769	3.78627e-06	3.31824e-05
24.4	0.0659667	0.0725854	0.0635479	0.0708667	0.0415521	0.0651188	0.0423542	0.0304396		0.0658	0.0715	0.0704	0.0545	0.0441	0.0464	0.042	0.0443		0.000166667	0.00108542	-0.00685208	0.0163667	-0.00254792	0.0187188	0.000354167	-0.0138604		2.77778e-08	1.17813e-06	4.6951e-05	0.000267868	6.49188e-06	0.000350392	1.25434e-07	0.000192111
24.6	0.0680167	0.0745854	0.0648979	0.0673167	0.0407521	0.0626188	0.0429042	0.0310396		0.0657	0.0714	0.0702	0.0545	0.0434	0.0454	0.042	0.0435		0.00231667	0.00318542	-0.00530208	0.0128167	-0.00264792	0.0172187	0.000904167	-0.0124604		5.36694e-06	1.01469e-05	2.81121e-05	0.000164267	7.01146e-06	0.000296485	8.17517e-07	0.000155262
24.8	0.0678167	0.0734354	0.0612979	0.0618167	0.0394021	0.0609687	0.0483042	0.0334896		0.0655	0.0712	0.0699	0.0546	0.0431	0.0448	0.042	0.0401		0.00231667	0.00223542	-0.00860208	0.00721667	-0.00369792	0.0161687	0.00630417	-0.00661042		5.36694e-06	4.99709e-06	7.39958e-05	5.20803e-05	1.36746e-05	0.000261428	3.97425e-05	4.36976e-05
25	0.0656167	0.0744854	0.0589979	0.0672667	0.0400521	0.0623187	0.0399042	0.0320896		0.0652	0.0711	0.0696	0.0545	0.043	0.0448	0.0426	0.0359		0.000416667	0.00338542	-0.0106021	0.0127667	-0.00294792	0.0175187	-0.00269583	-0.00381042		1.73611e-07	1.1461e-05	0.000112404	0.000162988	8.69021e-06	0.000306907	7.26752e-06	1.45193e-05
25.2	0.0659167	0.0742854	0.0598479	0.0727167	0.0414021	0.0607188	0.0416042	0.0264896		0.0649	0.071	0.0694	0.0546	0.0431	0.0448	0.0435	0.033		0.00101667	0.00328542	-0.00955208	0.0181167	-0.00169792	0.0159188	-0.00189583	-0.00651042		1.03361e-06	1.0794e-05	9.12423e-05	0.000328214	2.88292e-06	0.000253407	3.59418e-06	4.23855e-05
25.4	0.0673167	0.0754854	0.0599479	0.0664167	0.0398021	0.0700188	0.0416542	0.0279396		0.0647	0.0708	0.0693	0.0546	0.043	0.0452	0.044	0.0325		0.00261667	0.00468542	-0.00935208	0.0118167	-0.00319792	0.0248188	-0.00234583	-0.00456042		6.84694e-06	2.19531e-05	8.74615e-05	0.000139634	1.02267e-05	0.00061597	5.50293e-06	2.07974e-05
25.6	0.0660667	0.0723354	0.0611979	0.0661167	0.0427521	0.0708687	0.0435042	0.0327396		0.0645	0.0705	0.0692	0.0547	0.0428	0.0459	0.0443	0.0332		0.00156667	0.00183542	-0.00800208	0.0114167	-4.79167e-05	0.0249687	-0.000795833	-0.000460417		2.45444e-06	3.36875e-06	6.40333e-05	0.00013034	2.29601e-09	0.000623438	6.33351e-07	2.11984e-07
25.8	0.0683667	0.0737354	0.0621479	0.0625167	0.0382521	0.0686688	0.0397042	0.0303896		0.0643	0.0702	0.069	0.0548	0.0428	0.0464	0.0443	0.0345		0.00406667	0.00353542	-0.00685208	0.00771667	-0.00454792	0.0222688	-0.00459583	-0.00411042		1.65378e-05	1.24992e-05	4.6951e-05	5.95469e-05	2.06835e-05	0.000495897	2.11217e-05	1.68955e-05
26	0.0657667	0.0744354	0.0613979	0.0610667	0.0405021	0.0644688	0.0372542	0.0276396		0.064	0.07	0.0686	0.0548	0.0431	0.0466	0.0441	0.0361		0.00176667	0.00443542	-0.00720208	0.00626667	-0.00259792	0.0178688	-0.00684583	-0.00846042		3.12111e-06	1.96729e-05	5.187e-05	3.92711e-05	6.74917e-06	0.000319292	4.68654e-05	7.15787e-05
26.2	0.0648667	0.0743354	0.0598979	0.0676167	0.0440521	0.0654187	0.0403042	0.0310396		0.0638	0.0697	0.0684	0.0545	0.0436	0.0465	0.0439	0.0374		0.00106667	0.00463542	-0.00850208	0.0131167	0.000452083	0.0189187	-0.00359583	-0.00636042		1.13778e-06	2.14871e-05	7.22854e-05	0.000172047	2.04379e-07	0.000357919	1.293e-05	4.04549e-05
26.4	0.0633667	0.0702354	0.0603979	0.0709667	0.0408021	0.0636687	0.0407542	0.0342896		0.0636	0.0692	0.0682	0.0541	0.0438	0.0464	0.0435	0.0377		-0.000233333	0.00103542	-0.00780208	0.0168667	-0.00299792	0.0172687	-0.00274583	-0.00341042		5.44444e-08	1.07209e-06	6.08725e-05	0.000284484	8.9875e-06	0.00029821	7.5396e-06	1.16309e-05
26.6	0.0613667	0.0751354	0.0594479	0.0659167	0.0356021	0.0615188	0.0418542	0.0251396		0.0632	0.0687	0.068	0.0537	0.0435	0.0464	0.0426	0.0372		-0.00183333	0.00643542	-0.00855208	0.0122167	-0.00789792	0.0151188	-0.000745833	-0.0120604		3.36111e-06	4.14146e-05	7.31381e-05	0.000149247	6.23771e-05	0.000228577	5.56267e-07	0.000145454
26.8	0.0672667	0.0732854	0.0591479	0.0642667	0.0354021	0.0618187	0.0421542	0.0279896		0.0627	0.0683	0.0677	0.0533	0.043	0.0462	0.0417	0.0367		0.00456667	0.00498542	-0.00855208	0.0109667	-0.00759792	0.0156188	0.000454167	-0.00871042		2.08544e-05	2.48544e-05	7.31381e-05	0.000120268	5.77283e-05	0.000243945	2.06267e-07	7.58714e-05
27	0.0649167	0.0719854	0.0597979	0.0653167	0.0386021	0.0628188	0.0390542	0.0308396		0.0623	0.0679	0.0675	0.0529	0.0423	0.0456	0.041	0.036		0.00261667	0.00408542	-0.00770208	0.0124167	-0.00369792	0.0172188	-0.00194583	-0.00516042		6.84694e-06	1.66906e-05	5.93221e-05	0.000154174	1.36746e-05	0.000296485	3.78627e-06	2.66299e-05
27.2	0.0600167	0.0711354	0.0599979	0.0686167	0.0366521	0.0671188	0.0421542	0.0284396		0.062	0.0675	0.0672	0.0524	0.0416	0.0447	0.0408	0.0342		-0.00198333	0.00363542	-0.00720208	0.0162167	-0.00494792	0.0224188	0.00135417	-0.00576042		3.93361e-06	1.32163e-05	5.187e-05	0.00026298	2.44819e-05	0.0005026	1.83377e-06	3.31824e-05
27.4	0.0662667	0.0746854	0.0592979	0.0642667	0.0405021	0.0703688	0.0406042	0.0296396		0.0616	0.0672	0.0667	0.052	0.041	0.0439	0.0407	0.0321		0.00466667	0.00748542	-0.00740208	0.0122667	-0.000497917	0.0264688	-9.58333e-05	-0.00246042		2.17778e-05	5.60315e-05	5.47908e-05	0.000150471	2.47921e-07	0.000700595	9.18403e-09	6.05365e-06
27.6	0.0610667	0.0709354	0.0585979	0.0635667	0.0384521	0.0698187	0.0395542	0.0329396		0.0615	0.067	0.0661	0.0518	0.0408	0.0435	0.041	0.0321		-0.000433333	0.00393542	-0.00750208	0.0117667	-0.00234792	0.0263188	-0.00144583	0.000839583		1.87778e-07	1.54875e-05	5.62813e-05	0.000138454	5.51271e-06	0.000692677	2.09043e-06	7.049e-07
27.8	0.0649167	0.0703354	0.0605479	0.0631667	0.0373521	0.0693187	0.0415542	0.0293396		0.0615	0.0668	0.0655	0.0517	0.0407	0.0433	0.0413	0.0333		0.00341667	0.00353542	-0.00495208	0.0114667	-0.00334792	0.0260188	0.000254167	-0.00396042		1.16736e-05	1.24992e-05	2.45231e-05	0.000131484	1.12085e-05	0.000676975	6.46007e-08	1.56849e-05
28	0.0628167	0.0711354	0.0619479	0.0626667	0.0394021	0.0630687	0.0446542	0.0233896		0.0613	0.0667	0.0651	0.0519	0.0407	0.0433	0.0412	0.0348		0.00151667	0.00443542	-0.00315208	0.0107667	-0.00129792	0.0197687	0.00345417	-0.0114104		2.30028e-06	1.96729e-05	9.93563e-06	0.000115921	1.68459e-06	0.000390803	1.19313e-05	0.000130198
28.2	0.0602167	0.0733354	0.0612979	0.0656167	0.0405521	0.0606187	0.0388042	0.0226896		0.0612	0.0667	0.0649	0.0521	0.0405	0.0436	0.0411	0.0358		-0.000983333	0.00663542	-0.00360208	0.0135167	5.20833e-05	0.0170187	-0.00229583	-0.0131104		9.66944e-07	4.40288e-05	1.2975e-05	0.0001827	2.71267e-09	0.000289638	5.27085e-06	0.000171883
28.4	0.0623167	0.0714854	0.0617979	0.0673167	0.0423021	0.0614687	0.0472042	0.0260396		0.061	0.0666	0.065	0.0523	0.0403	0.0442	0.0414	0.0365		0.00131667	0.00488542	-0.00320208	0.0150167	0.00200208	0.0172687	0.00580417	-0.0104604		1.73361e-06	2.38673e-05	1.02533e-05	0.0002255	4.00834e-06	0.00029821	3.36884e-05	0.00010942
28.6	0.0640167	0.0743354	0.0598979	0.0617667	0.0393521	0.0602187	0.0398042	0.0310896		0.0607	0.0664	0.0653	0.0523	0.0402	0.0445	0.0418	0.0371		0.00331667	0.00793542	-0.00540208	0.00946667	-0.000847917	0.0157187	-0.00199583	-0.00601042		1.10003e-05	6.29708e-05	2.91825e-05	8.96178e-05	7.18963e-07	0.000247079	3.98335e-06	3.61251e-05
28.8	0.0632167	0.0721354	0.0591979	0.0606667	0.0368521	0.0635687	0.0402042	0.0327896		0.0604	0.0663	0.0655	0.0521	0.0404	0.0446	0.0422	0.0374		0.00281667	0.00583542	-0.00630208	0.00856667	-0.00354792	0.0189687	-0.00199583	-0.00461042		7.93361e-06	3.40521e-05	3.97163e-05	7.33878e-05	1.25877e-05	0.000359813	3.98335e-06	2.12559e-05
29	0.0622667	0.0721854	0.0617479	0.0612667	0.0387021	0.0578188	0.0409542	0.0327896		0.0603	0.0661	0.0654	0.0518	0.041	0.0445	0.0421	0.0369		0.00196667	0.00608542	-0.00365208	0.00946667	-0.00229792	0.0133188	-0.00114583	-0.00411042		3.86778e-06	3.70323e-05	1.33377e-05	8.96178e-05	5.28042e-06	0.000177389	1.31293e-06	1.68955e-05
29.2	0.0631167	0.0727854	0.0602479	0.0618667	0.0400021	0.0609188	0.0421542	0.0399896		0.0602	0.0659	0.0652	0.0515	0.0416	0.0444	0.0416	0.0356		0.00291667	0.00688542	-0.00495208	0.0103667	-0.00159792	0.0165187	0.000554167	0.00438958		8.50694e-06	4.7409e-05	2.45231e-05	0.000107468	2.55334e-06	0.000272869	3.07101e-07	1.92684e-05
29.4	0.0630667	0.0728354	0.0610479	0.0635167	0.0399521	0.0582188	0.0441042	0.0297396		0.0601	0.0657	0.0649	0.0512	0.0417	0.0443	0.0406	0.0346		0.00296667	0.00713542	-0.00385208	0.0123167	-0.00174792	0.0139188	0.00350417	-0.00486042		8.80111e-06	5.09142e-05	1.48385e-05	0.0001517	3.05521e-06	0.000193732	1.22792e-05	2.36237e-05
29.6	0.0600667	0.0734354	0.0596979	0.0634167	0.0375521	0.0576687	0.0416542	0.0243896		0.0598	0.0654	0.0647	0.051	0.0412	0.0442	0.0397	0.0339		0.000266667	0.00803542	-0.00500208	0.0124167	-0.00364792	0.0134687	0.00195417	-0.00951042		7.11111e-08	6.45679e-05	2.50208e-05	0.000154174	1.33073e-05	0.000181407	3.81877e-06	9.0448e-05
29.8	0.0603667	0.0701354	0.0596979	0.0644667	0.0386021	0.0562188	0.0408042	0.0306896		0.0596	0.0651	0.0644	0.0507	0.0404	0.0442	0.0393	0.033		0.000766667	0.00503542	-0.00470208	0.0137667	-0.00179792	0.0120188	0.00150417	-0.00231042		5.87778e-07	2.53554e-05	2.21096e-05	0.000189521	3.2325e-06	0.00014445	2.26252e-06	5.33803e-06
30	0.0608167	0.0685354	0.0578479	0.0688667	0.0380021	0.0558188	0.0412542	0.0270396		0.0593	0.0648	0.0642	0.0505	0.0395	0.0439	0.0394	0.0323		0.00151667	0.00373542	-0.00635208	0.0183667	-0.00149792	0.0119187	0.00185417	-0.00526042		2.30028e-06	1.39533e-05	4.0349e-05	0.000337334	2.24375e-06	0.000142057	3.43793e-06	2.7672e-05
30.2	0.0639167	0.0693354	0.0598979	0.0645667	0.0396521	0.0588687	0.0425542	0.0336396		0.0591	0.0645	0.064	0.0503	0.0388	0.0433	0.0395	0.0328		0.00481667	0.00483542	-0.00410208	0.0142667	0.000852083	0.0155687	0.00305417	0.000839583		2.32003e-05	2.33813e-05	1.68271e-05	0.000203538	7.26046e-07	0.000242386	9.32793e-06	7.049e-07
30.4	0.0618167	0.0706354	0.0622979	0.0591667	0.0372521	0.0628188	0.0394042	0.0329396		0.0589	0.0642	0.0638	0.0499	0.0386	0.0425	0.0396	0.0338		0.00291667	0.00643542	-0.00150208	0.00926667	-0.00134792	0.0203188	-0.000195833	-0.000860417		8.50694e-06	4.14146e-05	2.25625e-06	8.58711e-05	1.81688e-06	0.000412852	3.83507e-08	7.40317e-07
30.6	0.0613667	0.0679354	0.0629479	0.0598667	0.0382521	0.0529688	0.0430042	0.0328896		0.0587	0.0639	0.0634	0.0497	0.0388	0.0418	0.0398	0.0348		0.00266667	0.00403542	-0.000452083	0.0101667	-0.000547917	0.0111688	0.00320417	-0.00191042		7.11111e-06	1.62846e-05	2.04379e-07	0.000103361	3.00213e-07	0.000124741	1.02667e-05	3.64969e-06
30.8	0.0592167	0.0731854	0.0618479	0.0579667	0.0391521	0.0536188	0.0382542	0.0333396		0.0585	0.0635	0.063	0.0497	0.039	0.0415	0.0397	0.0351		0.000716667	0.00968542	-0.00115208	0.00826667	0.000152083	0.0121188	-0.00144583	-0.00176042		5.13611e-07	9.38073e-05	1.3273e-06	6.83378e-05	2.31293e-08	0.000146864	2.09043e-06	3.09907e-06
31	0.0568167	0.0720354	0.0594979	0.0580167	0.0369021	0.0550187	0.0384042	0.0268396		0.0583	0.0632	0.0625	0.0498	0.039	0.0416	0.0395	0.0345		-0.00148333	0.00883542	-0.00300208	0.00821667	-0.00209792	0.0134188	-0.00109583	-0.00766042		2.20028e-06	7.80646e-05	9.0125e-06	6.75136e-05	4.40125e-06	0.000180063	1.20085e-06	5.8682e-05
31.2	0.0598167	0.0688854	0.0572979	0.0586167	0.0366021	0.0514687	0.0420542	0.0308896		0.058	0.0629	0.0621	0.0498	0.0388	0.0419	0.0393	0.0337		0.00181667	0.00598542	-0.00480208	0.00881667	-0.00219792	0.00956875	0.00275417	-0.00281042		3.30028e-06	3.58252e-05	2.306e-05	7.77336e-05	4.83084e-06	9.1561e-05	7.58543e-06	7.89844e-06
31.4	0.0607667	0.0698354	0.0567479	0.0634667	0.0385521	0.0548187	0.0373042	0.0320896		0.0576	0.0626	0.0619	0.0497	0.0385	0.0422	0.0395	0.0332		0.00316667	0.00723542	-0.00515208	0.0137667	5.20833e-05	0.0126187	-0.00219583	-0.00111042		1.00278e-05	5.23513e-05	2.6544e-05	0.000189521	2.71267e-09	0.000159233	4.82168e-06	1.23303e-06
31.6	0.0588667	0.0680354	0.0559479	0.0576167	0.0384521	0.0544688	0.0394042	0.0386896		0.0572	0.0622	0.0618	0.0495	0.0383	0.0424	0.0399	0.033		0.00166667	0.00583542	-0.00585208	0.00811667	0.000152083	0.0120688	-0.000495833	0.00568958		2.77778e-06	3.40521e-05	3.42469e-05	6.58803e-05	2.31293e-08	0.000145655	2.45851e-07	3.23714e-05
31.8	0.0611667	0.0663854	0.0560979	0.0552167	0.0385521	0.0515188	0.0387042	0.0297896		0.0567	0.0618	0.0618	0.0492	0.0385	0.0424	0.04	0.0329		0.00446667	0.00458542	-0.00570208	0.00601667	5.20833e-05	0.00911875	-0.00129583	-0.00311042		1.99511e-05	2.1026e-05	3.25138e-05	3.62003e-05	2.71267e-09	8.31516e-05	1.67918e-06	9.67469e-06
32	0.0590667	0.0670354	0.0563479	0.0552667	0.0386521	0.0525687	0.0393542	0.0394396		0.0563	0.0614	0.0617	0.0488	0.0389	0.0422	0.0396	0.0328		0.00276667	0.00563542	-0.00535208	0.00646667	-0.000247917	0.0103687	-0.000245833	0.00663958		7.65444e-06	3.17579e-05	2.86448e-05	4.18178e-05	6.14627e-08	0.000107511	6.0434e-08	4.40841e-05
32.2	0.0568167	0.0669854	0.0558479	0.0556167	0.0408021	0.0573187	0.0366042	0.0330896		0.0559	0.0608	0.0614	0.0484	0.039	0.0421	0.0387	0.0329		0.000916667	0.00618542	-0.00555208	0.00721667	0.00180208	0.0152187	-0.00209583	0.000189583		8.40278e-07	3.82594e-05	3.08256e-05	5.20803e-05	3.2475e-06	0.00023161	4.39252e-06	3.59418e-08
32.4	0.0572167	0.0683854	0.0568479	0.0601667	0.0400521	0.0526688	0.0375042	0.0342896		0.0555	0.0604	0.0609	0.0482	0.0385	0.042	0.0376	0.0333		0.00171667	0.00798542	-0.00405208	0.0119667	0.00155208	0.0106687	-9.58333e-05	0.000989583		2.94694e-06	6.37669e-05	1.64194e-05	0.000143201	2.40896e-06	0.000113822	9.18403e-09	9.79275e-07
32.6	0.0585667	0.0655354	0.0570479	0.0621167	0.0389021	0.0549188	0.0363542	0.0361896		0.055	0.0601	0.0604	0.0479	0.0377	0.0418	0.0369	0.0333		0.00356667	0.00543542	-0.00335208	0.0142167	0.00120208	0.0131188	-0.000545833	0.00288958		1.27211e-05	2.95438e-05	1.12365e-05	0.000202114	1.445e-06	0.000172102	2.97934e-07	8.34969e-06
32.8	0.0552667	0.0624354	0.0547479	0.0612667	0.0364521	0.0598187	0.0398542	0.0315896		0.0548	0.06	0.0598	0.0476	0.0369	0.0414	0.0367	0.0328		0.000466667	0.00243542	-0.00505208	0.0136667	-0.000447917	0.0184187	0.00315417	-0.00121042		2.17778e-07	5.93125e-06	2.55235e-05	0.000186778	2.00629e-07	0.00033925	9.94877e-06	1.46511e-06
33	0.0580167	0.0685854	0.0534479	0.0561667	0.0387521	0.0608687	0.0373042	0.0327396		0.0546	0.0599	0.0595	0.0474	0.0362	0.0409	0.0369	0.0321		0.00341667	0.00868542	-0.00605208	0.00876667	0.00255208	0.0199688	0.000404167	0.000639583		1.16736e-05	7.54365e-05	3.66277e-05	7.68544e-05	6.51313e-06	0.000398751	1.63351e-07	4.09067e-07
33.2	0.0577667	0.0700854	0.0543979	0.0576667	0.0377021	0.0552688	0.0410542	0.0348896		0.0545	0.0598	0.0593	0.0471	0.0358	0.0404	0.0373	0.032		0.00326667	0.0102854	-0.00490208	0.0105667	0.00190208	0.0148688	0.00375417	0.00288958		1.06711e-05	0.00010579	2.40304e-05	0.000111654	3.61792e-06	0.00022108	1.40938e-05	8.34969e-06
33.4	0.0577167	0.0669854	0.0570479	0.0603667	0.0359521	0.0546188	0.0397542	0.0369896		0.0544	0.0596	0.0592	0.0469	0.0358	0.0399	0.0376	0.0324		0.00331667	0.00738542	-0.00215208	0.0134667	0.000152083	0.0147188	0.00215417	0.00458958		1.10003e-05	5.45444e-05	4.63146e-06	0.000181351	2.31293e-08	0.000216642	4.64043e-06	2.10643e-05
33.6	0.0571667	0.0649854	0.0587979	0.0578167	0.0356521	0.0526187	0.0387042	0.0341896		0.0543	0.0594	0.0592	0.0467	0.036	0.0396	0.0377	0.0327		0.00286667	0.00558542	-0.000402083	0.0111167	-0.000347917	0.0130187	0.00100417	0.00148958		8.21778e-06	3.11969e-05	1.61671e-07	0.00012358	1.21046e-07	0.000169488	1.00835e-06	2.21886e-06
33.8	0.0573167	0.0660354	0.0570479	0.0563667	0.0376021	0.0510187	0.0373542	0.0324396		0.054	0.0591	0.059	0.0467	0.0363	0.0396	0.0376	0.0329		0.00331667	0.00693542	-0.00195208	0.00966667	0.00130208	0.0114187	-0.000245833	-0.000460417		1.10003e-05	4.81e-05	3.81063e-06	9.34444e-05	1.69542e-06	0.000130388	6.0434e-08	2.11984e-07
34	0.0546167	0.0653854	0.0541979	0.0603167	0.0393521	0.0465188	0.0401542	0.0356896		0.0538	0.0586	0.0587	0.0467	0.0364	0.0398	0.0375	0.0329		0.000816667	0.00678542	-0.00450208	0.0136167	0.00295208	0.00671875	0.00265417	0.00278958		6.66944e-07	4.60419e-05	2.02688e-05	0.000185414	8.7148e-06	4.51416e-05	7.0446e-06	7.78178e-06
34.2	0.0558667	0.0723854	0.0521979	0.0619667	0.0393521	0.0513687	0.0364542	0.0340896		0.0535	0.0581	0.0583	0.0467	0.0364	0.04	0.0374	0.0332		0.00236667	0.0142854	-0.00610208	0.0152667	0.00295208	0.0113687	-0.000945833	0.000889583		5.60111e-06	0.000204073	3.72354e-05	0.000233071	8.7148e-06	0.000129248	8.94601e-07	7.91359e-07
34.4	0.0581167	0.0708354	0.0542979	0.0577167	0.0372021	0.0496188	0.0372042	0.0303396		0.0532	0.0577	0.0579	0.0465	0.0363	0.0402	0.0375	0.0335		0.00491667	0.0131354	-0.00360208	0.0112167	0.000902083	0.00941875	-0.000295833	-0.00316042		2.41736e-05	0.000172539	1.2975e-05	0.000125814	8.13754e-07	8.87129e-05	8.75174e-08	9.98823e-06
34.6	0.0549667	0.0662854	0.0550979	0.0546167	0.0363521	0.0571687	0.0372542	0.0302896		0.0528	0.0573	0.0575	0.0463	0.0363	0.0402	0.0375	0.0332		0.00216667	0.00898542	-0.00240208	0.00831667	5.20833e-05	0.0169687	-0.000245833	-0.00291042		4.69444e-06	8.07377e-05	5.77e-06	6.91669e-05	2.71267e-09	0.000287938	6.0434e-08	8.47053e-06
34.8	0.0587667	0.0677354	0.0606979	0.0538667	0.0366521	0.0539687	0.0373042	0.0276396		0.0525	0.057	0.0572	0.0459	0.0363	0.0402	0.0374	0.0325		0.00626667	0.0107354	0.00349792	0.00796667	0.000352083	0.0137687	-9.58333e-05	-0.00486042		3.92711e-05	0.000115249	1.22354e-05	6.34678e-05	1.23963e-07	0.000189578	9.18403e-09	2.36237e-05
35	0.0525667	0.0680354	0.0584479	0.0546667	0.0364021	0.0535687	0.0358042	0.0303396		0.0521	0.0567	0.0571	0.0454	0.0361	0.04	0.037	0.0318		0.000466667	0.0113354	0.00134792	0.00926667	0.000302083	0.0135687	-0.00119583	-0.00146042		2.17778e-07	0.000128492	1.81688e-06	8.58711e-05	9.12543e-08	0.000184111	1.43002e-06	2.13282e-06
35.2	0.0547667	0.0668354	0.0536979	0.0588167	0.0374521	0.0498688	0.0393542	0.0325896		0.0518	0.0566	0.0571	0.045	0.0358	0.0398	0.0363	0.0313		0.00296667	0.0102354	-0.00340208	0.0138167	0.00165208	0.0100688	0.00305417	0.00128958		8.80111e-06	0.000104764	1.15742e-05	0.0001909	2.72938e-06	0.00010138	9.32793e-06	1.66303e-06
35.4	0.0564167	0.0687854	0.0534479	0.0579667	0.0340021	0.0552187	0.0355542	0.0352396		0.0516	0.0564	0.0569	0.0447	0.0353	0.0394	0.0356	0.0309		0.00481667	0.0123854	-0.00345208	0.0132667	-0.00129792	0.0158187	-4.58333e-05	0.00433958		2.32003e-05	0.000153399	1.19169e-05	0.000176004	1.68459e-06	0.000250233	2.10069e-09	1.8832e-05
35.6	0.0527167	0.0662354	0.0529979	0.0529167	0.0330521	0.0562188	0.0375542	0.0296396		0.0514	0.0563	0.0567	0.0444	0.0347	0.039	0.0351	0.0306		0.00131667	0.00993542	-0.00370208	0.00851667	-0.00164792	0.0172188	0.00245417	-0.000960417		1.73361e-06	9.87125e-05	1.37054e-05	7.25336e-05	2.71563e-06	0.000296485	6.02293e-06	9.224e-07
35.8	0.0567167	0.0620854	0.0509479	0.0524167	0.0355521	0.0565688	0.0366042	0.0244396		0.0513	0.0562	0.0564	0.0443	0.0343	0.0385	0.0348	0.0305		0.00541667	0.00588542	-0.00545208	0.00811667	0.00125208	0.0180688	0.00180417	-0.00606042		2.93403e-05	3.46381e-05	2.97252e-05	6.58803e-05	1.56771e-06	0.00032648	3.25502e-06	3.67287e-05
36	0.0542667	0.0617354	0.0542479	0.0513167	0.0378021	0.0554687	0.0364542	0.0254396		0.0511	0.0561	0.0561	0.0442	0.0339	0.0381	0.0347	0.0306		0.00316667	0.00563542	-0.00185208	0.00711667	0.00390208	0.0173687	0.00175417	-0.00516042		1.00278e-05	3.17579e-05	3.43021e-06	5.06469e-05	1.52263e-05	0.000301673	3.0771e-06	2.66299e-05
36.2	0.0558667	0.0643354	0.0569479	0.0534167	0.0358521	0.0504687	0.0375042	0.0283396		0.051	0.056	0.0558	0.0441	0.0337	0.0378	0.0347	0.031		0.00486667	0.00833542	0.00114792	0.00931667	0.00215208	0.0126687	0.00280417	-0.00266042		2.36844e-05	6.94792e-05	1.31771e-06	8.68003e-05	4.63146e-06	0.000160497	7.86335e-06	7.07782e-06
36.4	0.0530667	0.0669854	0.0568979	0.0518667	0.0348521	0.0501187	0.0398542	0.0315896		0.0509	0.0559	0.0556	0.0442	0.0335	0.0378	0.035	0.0312		0.00216667	0.0110854	0.00129792	0.00766667	0.00135208	0.0123187	0.00485417	0.000389583		4.69444e-06	0.000122886	1.68459e-06	5.87778e-05	1.82813e-06	0.000151752	2.35629e-05	1.51775e-07
36.6	0.0568667	0.0668854	0.0541479	0.0556667	0.0346521	0.0509187	0.0364042	0.0254396		0.0508	0.0557	0.0554	0.0442	0.0333	0.0378	0.0352	0.031		0.00606667	0.0111854	-0.00125208	0.0114667	0.00135208	0.0131187	0.00120417	-0.00556042		3.68044e-05	0.000125114	1.56771e-06	0.000131484	1.82813e-06	0.000172102	1.45002e-06	3.09182e-05
36.8	0.0539167	0.0713854	0.0521479	0.0587167	0.0380521	0.0509187	0.0338542	0.0275896		0.0506	0.0556	0.0553	0.0441	0.0333	0.0377	0.0353	0.0305		0.00331667	0.0157854	-0.00315208	0.0146167	0.00475208	0.0132188	-0.00144583	-0.00291042		1.10003e-05	0.000249179	9.93563e-06	0.000213647	2.25823e-05	0.000174735	2.09043e-06	8.47053e-06
37	0.0539167	0.0739354	0.0506479	0.0602167	0.0343521	0.0537688	0.0335042	0.0255396		0.0505	0.0554	0.0551	0.0439	0.0334	0.0376	0.0352	0.0299		0.00341667	0.0185354	-0.00445208	0.0163167	0.000952083	0.0161688	-0.00169583	-0.00436042		1.16736e-05	0.000343562	1.9821e-05	0.000266234	9.06463e-07	0.000261428	2.87585e-06	1.90132e-05
37.2	0.0547167	0.0644854	0.0527979	0.0519167	0.0375521	0.0535687	0.0364542	0.0217396		0.0503	0.0553	0.0549	0.0436	0.0337	0.0374	0.0352	0.0296		0.00441667	0.00918542	-0.00210208	0.00831667	0.00385208	0.0161687	0.00125417	-0.00786042		1.95069e-05	8.43719e-05	4.41875e-06	6.91669e-05	1.48385e-05	0.000261428	1.57293e-06	6.17862e-05
37.4	0.0527167	0.0634354	0.0536479	0.0511167	0.0378021	0.0498187	0.0351042	0.0234396		0.0501	0.0552	0.0548	0.0434	0.0339	0.0373	0.0351	0.0294		0.00261667	0.00823542	-0.00115208	0.00771667	0.00390208	0.0125187	4.16667e-06	-0.00596042		6.84694e-06	6.78221e-05	1.3273e-06	5.95469e-05	1.52263e-05	0.000156719	1.73611e-11	3.55266e-05
37.6	0.0557167	0.0647854	0.0544979	0.0549167	0.0357521	0.0484187	0.0374542	0.0270396		0.05	0.0551	0.0547	0.0431	0.034	0.0371	0.035	0.0294		0.00571667	0.00968542	-0.000202083	0.0118167	0.00175208	0.0113187	0.00245417	-0.00236042		3.26803e-05	9.38073e-05	4.08377e-08	0.000139634	3.0698e-06	0.000128114	6.02293e-06	5.57157e-06
37.8	0.0509167	0.0640854	0.0552479	0.0497667	0.0358521	0.0496188	0.0373042	0.0269896		0.0499	0.055	0.0547	0.0429	0.034	0.037	0.0347	0.0293		0.00101667	0.00908542	0.000547917	0.00686667	0.00185208	0.0126188	0.00260417	-0.00231042		1.03361e-06	8.25448e-05	3.00213e-07	4.71511e-05	3.43021e-06	0.000159233	6.78168e-06	5.33803e-06
38	0.0524667	0.0633854	0.0547479	0.0492167	0.0367021	0.0481687	0.0359042	0.0209396		0.0499	0.055	0.0546	0.0428	0.0337	0.0372	0.0342	0.0292		0.00256667	0.00838542	0.000147917	0.00641667	0.00300208	0.0109687	0.00170417	-0.00826042		6.58778e-06	7.03152e-05	2.18793e-08	4.11736e-05	9.0125e-06	0.000120313	2.90418e-06	6.82345e-05
38.2	0.0527667	0.0640854	0.0518979	0.0546167	0.0353021	0.0529188	0.0346042	0.0254896		0.0499	0.055	0.0546	0.0427	0.0332	0.0374	0.0338	0.0291		0.00286667	0.00908542	-0.00270208	0.0119167	0.00210208	0.0155187	0.000804167	-0.00361042		8.21778e-06	8.25448e-05	7.30125e-06	0.000142007	4.41875e-06	0.000240832	6.46684e-07	1.30351e-05
38.4	0.0523167	0.0633854	0.0513479	0.0557667	0.0336021	0.0586688	0.0350542	0.0232896		0.0499	0.055	0.0546	0.0426	0.0326	0.0375	0.0334	0.0287		0.00241667	0.00838542	-0.00325208	0.0131667	0.00100208	0.0211688	0.00165417	-0.00541042		5.84028e-06	7.03152e-05	1.0576e-05	0.000173361	1.00417e-06	0.000448116	2.73627e-06	2.92726e-05
38.6	0.0507667	0.0632854	0.0546979	0.0540167	0.0367021	0.0535187	0.0349042	0.0210896		0.0499	0.055	0.0546	0.0425	0.0321	0.0374	0.0331	0.028		0.000866667	0.00828542	9.79167e-05	0.0115167	0.00460208	0.0161187	0.00180417	-0.00691042		7.51111e-07	6.86481e-05	9.58767e-09	0.000132634	2.11792e-05	0.000259814	3.25502e-06	4.77539e-05
38.8	0.0536667	0.0597354	0.0541479	0.0506667	0.0377021	0.0522188	0.0353542	0.0226896		0.0498	0.0548	0.0546	0.0424	0.0319	0.0369	0.033	0.0273		0.00386667	0.00493542	-0.000452083	0.00826667	0.00580208	0.0153187	0.00235417	-0.00461042		1.49511e-05	2.43583e-05	2.04379e-07	6.83378e-05	3.36642e-05	0.000234664	5.5421e-06	2.12559e-05
39	0.0515167	0.0601354	0.0533479	0.0522667	0.0410021	0.0472687	0.0370542	0.0237896		0.0496	0.0546	0.0545	0.0423	0.0319	0.0364	0.0329	0.027		0.00191667	0.00553542	-0.00115208	0.00996667	0.00910208	0.0108687	0.00415417	-0.00321042		3.67361e-06	3.06408e-05	1.3273e-06	9.93344e-05	8.28479e-05	0.00011813	1.72571e-05	1.03068e-05
39.2	0.0511667	0.0614854	0.0527479	0.0542667	0.0388021	0.0455187	0.0356542	0.0248396		0.0494	0.0543	0.0544	0.0422	0.0321	0.0359	0.033	0.0273		0.00176667	0.00718542	-0.00165208	0.0120667	0.00670208	0.00961875	0.00265417	-0.00246042		3.12111e-06	5.16302e-05	2.72938e-06	0.000145604	4.49179e-05	9.25204e-05	7.0446e-06	6.05365e-06
39.4	0.0523667	0.0606354	0.0498979	0.0531667	0.0400521	0.0488188	0.0363042	0.0243396		0.0492	0.054	0.0541	0.0421	0.0323	0.0355	0.0331	0.028		0.00316667	0.00663542	-0.00420208	0.0110667	0.00775208	0.0133188	0.00320417	-0.00366042		1.00278e-05	4.40288e-05	1.76575e-05	0.000122471	6.00948e-05	0.000177389	1.02667e-05	1.33987e-05
39.6	0.0496667	0.0642354	0.0498479	0.0522167	0.0399021	0.0496188	0.0335542	0.0263396		0.0489	0.0538	0.0539	0.0421	0.0323	0.0353	0.0332	0.0286		0.000766667	0.0104354	-0.00405208	0.0101167	0.00760208	0.0143188	0.000354167	-0.00226042		5.87778e-07	0.000108898	1.64194e-05	0.000102347	5.77917e-05	0.000205027	1.25434e-07	5.10948e-06
39.8	0.0513167	0.0607354	0.0511979	0.0508167	0.0341021	0.0511688	0.0362042	0.0209396		0.0487	0.0538	0.0536	0.042	0.0321	0.0353	0.0332	0.0287		0.00261667	0.00693542	-0.00240208	0.00881667	0.00200208	0.0158688	0.00300417	-0.00776042		6.84694e-06	4.81e-05	5.77e-06	7.77336e-05	4.00834e-06	0.000251817	9.02502e-06	6.02241e-05
40	0.0514667	0.0613354	0.0508479	0.0491667	0.0319521	0.0497187	0.0341042	0.0161896		0.0486	0.0537	0.0534	0.0419	0.0318	0.0354	0.0332	0.0284		0.00286667	0.00763542	-0.00255208	0.00726667	0.000152083	0.0143187	0.000904167	-0.0122104		8.21778e-06	5.82996e-05	6.51313e-06	5.28044e-05	2.31293e-08	0.000205027	8.17517e-07	0.000149094
40.2	0.0516167	0.0638854	0.0548979	0.0514667	0.0337021	0.0514687	0.0356542	0.0194396		0.0486	0.0537	0.0532	0.0417	0.0316	0.0355	0.0332	0.0282		0.00301667	0.0101854	0.00169792	0.00976667	0.00210208	0.0159687	0.00245417	-0.00876042		9.10028e-06	0.000103743	2.88292e-06	9.53878e-05	4.41875e-06	0.000255001	6.02293e-06	7.67449e-05
40.4	0.0500167	0.0619354	0.0530979	0.0472167	0.0349021	0.0506187	0.0347042	0.0230396		0.0485	0.0537	0.0532	0.0415	0.0315	0.0356	0.0331	0.0278		0.00151667	0.00823542	-0.000102083	0.00571667	0.00340208	0.0150187	0.00160417	-0.00476042		2.30028e-06	6.78221e-05	1.0421e-08	3.26803e-05	1.15742e-05	0.000225563	2.57335e-06	2.26616e-05
40.6	0.0525667	0.0586854	0.0500479	0.0491667	0.0356021	0.0492187	0.0338042	0.0228896		0.0485	0.0537	0.0532	0.0413	0.0315	0.0356	0.033	0.0274		0.00406667	0.00498542	-0.00315208	0.00786667	0.00410208	0.0136187	0.000804167	-0.00451042		1.65378e-05	2.48544e-05	9.93563e-06	6.18844e-05	1.68271e-05	0.00018547	6.46684e-07	2.03439e-05
40.8	0.0500667	0.0615854	0.0500979	0.0503667	0.0396521	0.0505188	0.0365542	0.0233396		0.0484	0.0536	0.0532	0.0411	0.0316	0.0355	0.0328	0.0269		0.00166667	0.00798542	-0.00310208	0.00926667	0.00805208	0.0150188	0.00375417	-0.00356042		2.77778e-06	6.37669e-05	9.62292e-06	8.58711e-05	6.4836e-05	0.000225563	1.40938e-05	1.26766e-05
41	0.0474667	0.0620354	0.0482479	0.0535667	0.0396021	0.0498187	0.0324542	0.0205396		0.0483	0.0534	0.0532	0.0409	0.0317	0.0354	0.0325	0.0268		-0.000833333	0.00863542	-0.00495208	0.0126667	0.00790208	0.0144187	-4.58333e-05	-0.00626042		6.94444e-07	7.45704e-05	2.45231e-05	0.000160444	6.24429e-05	0.0002079	2.10069e-09	3.91928e-05
41.2	0.0491667	0.0624854	0.0489479	0.0510167	0.0356021	0.0484687	0.0336042	0.0209396		0.0482	0.0533	0.0531	0.0408	0.0318	0.0354	0.0321	0.0268		0.000966667	0.00918542	-0.00415208	0.0102167	0.00380208	0.0130687	0.00150417	-0.00586042		9.34444e-07	8.43719e-05	1.72398e-05	0.00010438	1.44558e-05	0.000170792	2.26252e-06	3.43445e-05
41.4	0.0495667	0.0601854	0.0536479	0.0478167	0.0333021	0.0486188	0.0346042	0.0224896		0.0482	0.0531	0.053	0.0409	0.0316	0.0355	0.0317	0.0267		0.00136667	0.00708542	0.000647917	0.00691667	0.00170208	0.0131188	0.00290417	-0.00421042		1.86778e-06	5.02031e-05	4.19796e-07	4.78403e-05	2.89709e-06	0.000172102	8.43418e-06	1.77276e-05
41.6	0.0491167	0.0574354	0.0567979	0.0475667	0.0323021	0.0492187	0.0352042	0.0230396		0.0481	0.0529	0.0529	0.0409	0.0312	0.0354	0.0315	0.0267		0.00101667	0.00453542	0.00389792	0.00666667	0.00110208	0.0138187	0.00370417	-0.00366042		1.03361e-06	2.057e-05	1.51938e-05	4.44444e-05	1.21459e-06	0.000190958	1.37209e-05	1.33987e-05
41.8	0.0508167	0.0609854	0.0536979	0.0461167	0.0309021	0.0466188	0.0322042	0.0225396		0.0479	0.0526	0.0528	0.0408	0.0308	0.0353	0.0314	0.0266		0.00291667	0.00838542	0.000897917	0.00531667	0.000102083	0.0113188	0.000804167	-0.00406042		8.50694e-06	7.03152e-05	8.06254e-07	2.82669e-05	1.0421e-08	0.000128114	6.46684e-07	1.6487e-05
42	0.0461167	0.0654854	0.0499979	0.0503667	0.0329521	0.0464687	0.0340042	0.0239896		0.0477	0.0522	0.0526	0.0407	0.0305	0.035	0.0314	0.0267		-0.00158333	0.0132854	-0.00260208	0.00966667	0.00245208	0.0114687	0.00260417	-0.00271042		2.50694e-06	0.000176502	6.77084e-06	9.34444e-05	6.01271e-06	0.000131532	6.78168e-06	7.34636e-06
42.2	0.0492167	0.0600354	0.0473479	0.0510667	0.0327521	0.0484187	0.0316042	0.0216896		0.0474	0.0519	0.0524	0.0405	0.0304	0.0346	0.0315	0.0267		0.00181667	0.00813542	-0.00505208	0.0105667	0.00235208	0.0138187	0.000104167	-0.00501042		3.30028e-06	6.6185e-05	2.55235e-05	0.000111654	5.5323e-06	0.000190958	1.08507e-08	2.51043e-05
42.4	0.0502167	0.0588854	0.0480479	0.0492667	0.0364521	0.0469688	0.0338042	0.0184396		0.0471	0.0514	0.0521	0.0404	0.0305	0.0342	0.0316	0.0268		0.00311667	0.00748542	-0.00405208	0.00886667	0.00595208	0.0127688	0.00220417	-0.00836042		9.71361e-06	5.60315e-05	1.64194e-05	7.86178e-05	3.54273e-05	0.000163041	4.85835e-06	6.98966e-05
42.6	0.0497667	0.0568354	0.0492479	0.0487167	0.0358521	0.0485687	0.0339542	0.0228896		0.0467	0.0512	0.0518	0.0402	0.0306	0.0339	0.0317	0.0268		0.00306667	0.00563542	-0.00255208	0.00851667	0.00525208	0.0146687	0.00225417	-0.00391042		9.40444e-06	3.17579e-05	6.51313e-06	7.25336e-05	2.75844e-05	0.000215172	5.08127e-06	1.52914e-05
42.8	0.0511167	0.0616854	0.0538479	0.0515667	0.0358021	0.0486188	0.0339042	0.0219396		0.0464	0.0512	0.0515	0.0401	0.0306	0.0337	0.0318	0.0268		0.00471667	0.0104854	0.00234792	0.0114667	0.00520208	0.0149188	0.00210417	-0.00486042		2.22469e-05	0.000109944	5.51271e-06	0.000131484	2.70617e-05	0.000222569	4.42752e-06	2.36237e-05
43	0.0486667	0.0611854	0.0545979	0.0479667	0.0331521	0.0484687	0.0351542	0.0202396		0.0464	0.0513	0.0512	0.0399	0.0305	0.0337	0.0319	0.0267		0.00226667	0.00988542	0.00339792	0.00806667	0.00265208	0.0147687	0.00325417	-0.00646042		5.13778e-06	9.77215e-05	1.15458e-05	6.50711e-05	7.03355e-06	0.000218116	1.05896e-05	4.1737e-05
43.2	0.0487167	0.0564354	0.0529479	0.0451167	0.0282021	0.0486188	0.0323542	0.0176396		0.0465	0.0514	0.0511	0.0397	0.0302	0.0337	0.0318	0.0265		0.00221667	0.00503542	0.00184792	0.00541667	-0.00199792	0.0149188	0.000554167	-0.00886042		4.91361e-06	2.53554e-05	3.4148e-06	2.93403e-05	3.99167e-06	0.000222569	3.07101e-07	7.8507e-05
43.4	0.0486667	0.0545354	0.0502979	0.0466667	0.0297021	0.0494187	0.0319042	0.0219396		0.0466	0.0517	0.0511	0.0396	0.03	0.0338	0.0316	0.0264		0.00206667	0.00283542	-0.000802083	0.00706667	-0.000297917	0.0156188	0.000304167	-0.00446042		4.27111e-06	8.03959e-06	6.43338e-07	4.99378e-05	8.87543e-08	0.000243945	9.25174e-08	1.98953e-05
43.6	0.0471667	0.0606354	0.0493979	0.0506167	0.0282021	0.0519187	0.0305542	0.0158396		0.0468	0.0518	0.0512	0.0394	0.0297	0.034	0.0314	0.0264		0.000366667	0.00883542	-0.00180208	0.0112167	-0.00149792	0.0179187	-0.000845833	-0.0105604		1.34444e-07	7.80646e-05	3.2475e-06	0.000125814	2.24375e-06	0.000321082	7.15434e-07	0.000111522
43.8	0.0487167	0.0608354	0.0486979	0.0517667	0.0323521	0.0511688	0.0320042	0.0142396		0.0469	0.0518	0.0514	0.0394	0.0297	0.0342	0.0311	0.0262		0.00181667	0.00903542	-0.00270208	0.0123667	0.00265208	0.0169688	0.000904167	-0.0119604		3.30028e-06	8.16388e-05	7.30125e-06	0.000152934	7.03355e-06	0.000287938	8.17517e-07	0.000143052
44	0.0474667	0.0632854	0.0486479	0.0509167	0.0320521	0.0516687	0.0323542	0.0149396		0.0469	0.0517	0.0515	0.0395	0.0298	0.0343	0.0309	0.0261		0.000566667	0.0115854	-0.00285208	0.0114167	0.00225208	0.0173688	0.00145417	-0.0111604		3.21111e-07	0.000134222	8.13438e-06	0.00013034	5.07188e-06	0.000301673	2.1146e-06	0.000124555
44.2	0.0462667	0.0571354	0.0513979	0.0485167	0.0323521	0.0442188	0.0332042	0.0208396		0.0467	0.0515	0.0516	0.0396	0.03	0.0343	0.0306	0.0259		-0.000433333	0.00563542	-0.000202083	0.00891667	0.00235208	0.00991875	0.00260417	-0.00506042		1.87778e-07	3.17579e-05	4.08377e-08	7.95069e-05	5.5323e-06	9.83816e-05	6.78168e-06	2.56078e-05
44.4	0.0489167	0.0582854	0.0550479	0.0455167	0.0322521	0.0480187	0.0342042	0.0194396		0.0465	0.0513	0.0515	0.0396	0.0301	0.0343	0.0304	0.0258		0.00241667	0.00698542	0.00354792	0.00591667	0.00215208	0.0137188	0.00380417	-0.00636042		5.84028e-06	4.8796e-05	1.25877e-05	3.50069e-05	4.63146e-06	0.000188204	1.44717e-05	4.04549e-05
44.6	0.0473167	0.0603354	0.0536979	0.0480167	0.0297021	0.0477187	0.0313042	0.0218896		0.0462	0.051	0.0514	0.0397	0.0301	0.0341	0.0304	0.0257		0.00111667	0.00933542	0.00229792	0.00831667	-0.000397917	0.0136187	0.000904167	-0.00381042		1.24694e-06	8.715e-05	5.28042e-06	6.91669e-05	1.58338e-07	0.00018547	8.17517e-07	1.45193e-05
44.8	0.0470667	0.0546854	0.0506979	0.0452667	0.0293021	0.0472187	0.0302542	0.0223396		0.046	0.0506	0.0512	0.0396	0.03	0.0339	0.0305	0.0256		0.00106667	0.00408542	-0.000502083	0.00566667	-0.000697917	0.0133187	-0.000245833	-0.00326042		1.13778e-06	1.66906e-05	2.52088e-07	3.21111e-05	4.87088e-07	0.000177389	6.0434e-08	1.06303e-05
45	0.0442667	0.0542854	0.0481979	0.0458167	0.0318021	0.0516188	0.0330042	0.0185896		0.0458	0.0502	0.051	0.0394	0.0297	0.0337	0.0306	0.0255		-0.00153333	0.00408542	-0.00280208	0.00641667	0.00210208	0.0179188	0.00240417	-0.00691042		2.35111e-06	1.66906e-05	7.85167e-06	4.11736e-05	4.41875e-06	0.000321082	5.78002e-06	4.77539e-05
45.2	0.0480167	0.0544854	0.0464479	0.0513667	0.0287521	0.0550687	0.0305042	0.0159396		0.0456	0.0499	0.0507	0.0392	0.0295	0.0334	0.0307	0.0253		0.00241667	0.00458542	-0.00425208	0.0121667	-0.000747917	0.0216688	-0.000195833	-0.00936042		5.84028e-06	2.1026e-05	1.80802e-05	0.000148028	5.59379e-07	0.000469535	3.83507e-08	8.76174e-05
45.4	0.0466167	0.0588854	0.0435979	0.0476167	0.0315521	0.0476188	0.0309542	0.0149396		0.0454	0.0495	0.0504	0.039	0.0293	0.0331	0.0307	0.0253		0.00121667	0.00938542	-0.00680208	0.00861667	0.00225208	0.0145188	0.000254167	-0.0103604		1.48028e-06	8.8086e-05	4.62683e-05	7.42469e-05	5.07188e-06	0.000210794	6.46007e-08	0.000107338
45.6	0.0469167	0.0564354	0.0459979	0.0446667	0.0308521	0.0453188	0.0321542	0.0156896		0.0452	0.0492	0.0501	0.0387	0.0291	0.0329	0.0305	0.0254		0.00171667	0.00723542	-0.00410208	0.00596667	0.00175208	0.0124188	0.00165417	-0.00971042		2.94694e-06	5.23513e-05	1.68271e-05	3.56011e-05	3.0698e-06	0.000154225	2.73627e-06	9.42922e-05
45.8	0.0459667	0.0557854	0.0481479	0.0468167	0.0312021	0.0472187	0.0306042	0.0188896		0.0449	0.0489	0.0498	0.0385	0.029	0.0327	0.0303	0.0255		0.00106667	0.00688542	-0.00165208	0.00831667	0.00220208	0.0145187	0.000304167	-0.00661042		1.13778e-06	4.7409e-05	2.72938e-06	6.91669e-05	4.84917e-06	0.000210794	9.25174e-08	4.36976e-05
46	0.0469667	0.0532354	0.0488979	0.0426667	0.0293521	0.0440688	0.0288542	0.0206396		0.0447	0.0487	0.0495	0.0382	0.0289	0.0325	0.0303	0.0255		0.00226667	0.00453542	-0.000602083	0.00446667	0.000452083	0.0115688	-0.00144583	-0.00486042		5.13778e-06	2.057e-05	3.62504e-07	1.99511e-05	2.04379e-07	0.000133836	2.09043e-06	2.36237e-05
46.2	0.0454167	0.0582854	0.0491979	0.0458667	0.0312021	0.0437688	0.0324042	0.0207396		0.0445	0.0485	0.0493	0.0381	0.0288	0.0324	0.0303	0.0254		0.000916667	0.00978542	-0.000102083	0.00776667	0.00240208	0.0113688	0.00210417	-0.00466042		8.40278e-07	9.57544e-05	1.0421e-08	6.03211e-05	5.77e-06	0.000129248	4.42752e-06	2.17195e-05
46.4	0.0457667	0.0601354	0.0470479	0.0495167	0.0311521	0.0453687	0.0311042	0.0195896		0.0443	0.0482	0.0491	0.038	0.0286	0.0324	0.0302	0.0253		0.00146667	0.0119354	-0.00205208	0.0115167	0.00255208	0.0129688	0.000904167	-0.00571042		2.15111e-06	0.000142454	4.21105e-06	0.000132634	6.51313e-06	0.000168188	8.17517e-07	3.26089e-05
46.6	0.0445167	0.0635854	0.0462479	0.0517667	0.0315521	0.0498688	0.0314042	0.0152396		0.0441	0.048	0.0489	0.038	0.0285	0.0325	0.03	0.0252		0.000416667	0.0155854	-0.00265208	0.0137667	0.00305208	0.0173688	0.00140417	-0.00996042		1.73611e-07	0.000242905	7.03355e-06	0.000189521	9.31521e-06	0.000301673	1.97168e-06	9.92099e-05
46.8	0.0447667	0.0577854	0.0492979	0.0481667	0.0323521	0.0498688	0.0301042	0.0202896		0.0439	0.0479	0.0487	0.038	0.0284	0.0325	0.0298	0.0248		0.000866667	0.00988542	0.000597917	0.0101667	0.00395208	0.0173688	0.000304167	-0.00451042		7.51111e-07	9.77215e-05	3.57504e-07	0.000103361	1.5619e-05	0.000301673	9.25174e-08	2.03439e-05
47	0.0454167	0.0538854	0.0500479	0.0451667	0.0326021	0.0425188	0.0302542	0.0167896		0.0437	0.0477	0.0485	0.0379	0.0283	0.0327	0.0296	0.0243		0.00171667	0.00618542	0.00154792	0.00726667	0.00430208	0.00981875	0.000654167	-0.00751042		2.94694e-06	3.82594e-05	2.39605e-06	5.28044e-05	1.85079e-05	9.64079e-05	4.27934e-07	5.64064e-05
47.2	0.0453667	0.0543854	0.0521979	0.0430167	0.0313521	0.0472187	0.0292542	0.0183896		0.0436	0.0476	0.0484	0.0379	0.0282	0.0328	0.0294	0.0238		0.00176667	0.00678542	0.00379792	0.00511667	0.00315208	0.0144187	-0.000145833	-0.00541042		3.12111e-06	4.60419e-05	1.44242e-05	2.61803e-05	9.93563e-06	0.0002079	2.12674e-08	2.92726e-05
47.4	0.0446167	0.0580354	0.0483979	0.0433667	0.0291521	0.0466688	0.0312042	0.0172896		0.0434	0.0476	0.0483	0.0377	0.0281	0.0328	0.0292	0.0237		0.00121667	0.0104354	9.79167e-05	0.00566667	0.00105208	0.0138687	0.00200417	-0.00641042		1.48028e-06	0.000108898	9.58767e-09	3.21111e-05	1.10688e-06	0.000192342	4.01668e-06	4.10934e-05
47.6	0.0471667	0.0541354	0.0495979	0.0429167	0.0277021	0.0428688	0.0286542	0.0190396		0.0432	0.0475	0.0482	0.0376	0.028	0.0327	0.0291	0.0238		0.00396667	0.00663542	0.00139792	0.00531667	-0.000297917	0.0101688	-0.000445833	-0.00476042		1.57344e-05	4.40288e-05	1.95417e-06	2.82669e-05	8.87543e-08	0.000103403	1.98767e-07	2.26616e-05
47.8	0.0441667	0.0531854	0.0500979	0.0461667	0.0298021	0.0451187	0.0299542	0.0162896		0.043	0.0475	0.0482	0.0374	0.0279	0.0325	0.029	0.024		0.00116667	0.00568542	0.00189792	0.00876667	0.00190208	0.0126187	0.000954167	-0.00771042		1.36111e-06	3.2324e-05	3.60209e-06	7.68544e-05	3.61792e-06	0.000159233	9.10434e-07	5.94505e-05
48	0.0420667	0.0557854	0.0460979	0.0499167	0.0307521	0.0452688	0.0325042	0.0141896		0.0429	0.0475	0.0481	0.0373	0.0278	0.0322	0.029	0.0242		-0.000833333	0.00828542	-0.00200208	0.0126167	0.00295208	0.0130688	0.00350417	-0.0100104		6.94444e-07	6.86481e-05	4.00834e-06	0.00015918	8.7148e-06	0.000170792	1.22792e-05	0.000100208
48.2	0.0442167	0.0531854	0.0495979	0.0557667	0.0311021	0.0454188	0.0299542	0.0140896		0.0428	0.0474	0.0481	0.0372	0.0278	0.032	0.0291	0.0243		0.00141667	0.00578542	0.00149792	0.0185667	0.00330208	0.0134188	0.000854167	-0.0102104		2.00694e-06	3.3471e-05	2.24375e-06	0.000344721	1.09038e-05	0.000180063	7.29601e-07	0.000104253
48.4	0.0448667	0.0542354	0.0490479	0.0502667	0.0312021	0.0424188	0.0294542	0.0126396		0.0427	0.0473	0.048	0.0371	0.0277	0.0318	0.0291	0.0241		0.00216667	0.00693542	0.00104792	0.0131667	0.00350208	0.0106188	0.000354167	-0.0114604		4.69444e-06	4.81e-05	1.09813e-06	0.000173361	1.22646e-05	0.000112758	1.25434e-07	0.000131341
48.6	0.0439667	0.0573354	0.0494479	0.0431167	0.0293021	0.0422187	0.0279542	0.0168396		0.0427	0.0471	0.0478	0.0371	0.0275	0.0316	0.0291	0.024		0.00126667	0.0102354	0.00164792	0.00601667	0.00180208	0.0106187	-0.00114583	-0.00716042		1.60444e-06	0.000104764	2.71563e-06	3.62003e-05	3.2475e-06	0.000112758	1.31293e-06	5.12716e-05
48.8	0.0428167	0.0577854	0.0508479	0.0435167	0.0313521	0.0459188	0.0317042	0.0173396		0.0427	0.047	0.0477	0.0369	0.0273	0.0316	0.029	0.0239		0.000116667	0.0107854	0.00314792	0.00661667	0.00405208	0.0143187	0.00270417	-0.00656042		1.36111e-08	0.000116325	9.90938e-06	4.37803e-05	1.64194e-05	0.000205027	7.31252e-06	4.30391e-05
49	0.0457167	0.0561354	0.0506979	0.0438167	0.0310521	0.0464187	0.0285042	0.0205396		0.0427	0.0468	0.0475	0.0368	0.0271	0.0316	0.0288	0.0238		0.00301667	0.00933542	0.00319792	0.00701667	0.00395208	0.0148187	-0.000295833	-0.00326042		9.10028e-06	8.715e-05	1.02267e-05	4.92336e-05	1.5619e-05	0.000219595	8.75174e-08	1.06303e-05
49.2	0.0452667	0.0569854	0.0489479	0.0462167	0.0298021	0.0444688	0.0294542	0.0165896		0.0426	0.0467	0.0473	0.0367	0.0269	0.0315	0.0288	0.0239		0.00266667	0.0102854	0.00164792	0.00951667	0.00290208	0.0129688	0.000654167	-0.00731042		7.11111e-06	0.00010579	2.71563e-06	9.05669e-05	8.42209e-06	0.000168188	4.27934e-07	5.34422e-05
49.4	0.0437167	0.0568354	0.0482979	0.0432167	0.0313521	0.0453687	0.0301042	0.0157396		0.0425	0.0465	0.0472	0.0366	0.0268	0.0315	0.0288	0.024		0.00121667	0.0103354	0.00109792	0.00661667	0.00455208	0.0138687	0.00130417	-0.00826042		1.48028e-06	0.000106821	1.20542e-06	4.37803e-05	2.07215e-05	0.000192342	1.70085e-06	6.82345e-05
49.6	0.0438667	0.0568854	0.0462479	0.0446167	0.0307021	0.0459687	0.0293542	0.0193396		0.0424	0.0463	0.0471	0.0364	0.0268	0.0314	0.0288	0.0241		0.00146667	0.0105854	-0.000852083	0.00821667	0.00390208	0.0145687	0.000554167	-0.00476042		2.15111e-06	0.000112051	7.26046e-07	6.75136e-05	1.52263e-05	0.000212248	3.07101e-07	2.26616e-05
49.8	0.0445667	0.0611354	0.0433979	0.0498667	0.0274021	0.0472187	0.0279042	0.0169396		0.0422	0.0461	0.047	0.0363	0.0269	0.0313	0.0288	0.024		0.00236667	0.0150354	-0.00360208	0.0135667	0.000502083	0.0159187	-0.000895833	-0.00706042		5.60111e-06	0.000226064	1.2975e-05	0.000184054	2.52088e-07	0.000253407	8.02517e-07	4.98495e-05
50	0.0442667	0.0567354	0.0422479	0.0444667	0.0291521	0.0434688	0.0280042	0.0190896		0.042	0.0459	0.0469	0.0362	0.027	0.0312	0.0288	0.0236		0.00226667	0.0108354	-0.00465208	0.00826667	0.00215208	0.0122688	-0.000795833	-0.00451042		5.13778e-06	0.000117406	2.16419e-05	6.83378e-05	4.63146e-06	0.000150522	6.33351e-07	2.03439e-05
50.2	0.0440167	0.0557854	0.0445479	0.0430667	0.0295521	0.0438687	0.0320042	0.0161396		0.0418	0.0457	0.0468	0.0361	0.0271	0.0312	0.0286	0.023		0.00221667	0.0100854	-0.00225208	0.00696667	0.00245208	0.0126687	0.00340417	-0.00686042		4.91361e-06	0.000101716	5.07188e-06	4.85344e-05	6.01271e-06	0.000160497	1.15884e-05	4.70653e-05
50.4	0.0428167	0.0531854	0.0452479	0.0430167	0.0289021	0.0441687	0.0309542	0.0145396		0.0416	0.0455	0.0466	0.0361	0.0271	0.0312	0.0283	0.0225		0.00121667	0.00768542	-0.00135208	0.00691667	0.00180208	0.0129688	0.00265417	-0.00796042		1.48028e-06	5.90656e-05	1.82813e-06	4.78403e-05	3.2475e-06	0.000168188	7.0446e-06	6.33682e-05
50.6	0.0437167	0.0544354	0.0463479	0.0474167	0.0275521	0.0472687	0.0279042	0.0185396		0.0414	0.0452	0.0465	0.036	0.0269	0.0312	0.028	0.0223		0.00231667	0.00923542	-0.000152083	0.0114167	0.000652083	0.0160687	-9.58333e-05	-0.00376042		5.36694e-06	8.52929e-05	2.31293e-08	0.00013034	4.25213e-07	0.000258205	9.18403e-09	1.41407e-05
50.8	0.0436167	0.0581854	0.0468479	0.0499167	0.0298521	0.0457188	0.0311542	0.0170396		0.0413	0.0451	0.0463	0.0359	0.0267	0.0312	0.0277	0.0224		0.00231667	0.0130854	0.000547917	0.0140167	0.00315208	0.0145188	0.00345417	-0.00536042		5.36694e-06	0.000171228	3.00213e-07	0.000196467	9.93563e-06	0.000210794	1.19313e-05	2.87341e-05
51	0.0427667	0.0584354	0.0440979	0.0450167	0.0305021	0.0466188	0.0305542	0.0175896		0.0411	0.0451	0.0461	0.0358	0.0264	0.0311	0.0276	0.0225		0.00166667	0.0133354	-0.00200208	0.00921667	0.00410208	0.0155188	0.00295417	-0.00491042		2.77778e-06	0.000177833	4.00834e-06	8.49469e-05	1.68271e-05	0.000240832	8.7271e-06	2.41122e-05
51.2	0.0423667	0.0593854	0.0435979	0.0469667	0.0294021	0.0467687	0.0301042	0.0134896		0.0411	0.045	0.046	0.0356	0.0261	0.0309	0.0275	0.0226		0.00126667	0.0143854	-0.00240208	0.0113667	0.00330208	0.0158687	0.00260417	-0.00911042		1.60444e-06	0.00020694	5.77e-06	0.000129201	1.09038e-05	0.000251817	6.78168e-06	8.29997e-05
51.4	0.0433667	0.0566854	0.0405479	0.0450667	0.0320021	0.0445688	0.0272042	0.0165396		0.041	0.0451	0.0458	0.0354	0.0259	0.0306	0.0274	0.0226		0.00236667	0.0115854	-0.00525208	0.00966667	0.00610208	0.0139688	-0.000195833	-0.00606042		5.60111e-06	0.000134222	2.75844e-05	9.34444e-05	3.72354e-05	0.000195126	3.83507e-08	3.67287e-05
51.6	0.0409667	0.0569854	0.0405479	0.0427667	0.0337021	0.0409187	0.0304542	0.0156396		0.041	0.0451	0.0458	0.0353	0.0258	0.0304	0.0274	0.0224		-3.33333e-05	0.0118854	-0.00525208	0.00746667	0.00790208	0.0105187	0.00305417	-0.00676042		1.11111e-09	0.000141263	2.75844e-05	5.57511e-05	6.24429e-05	0.000110644	9.32793e-06	4.57032e-05
51.8	0.0440167	0.0569854	0.0443479	0.0433167	0.0318021	0.0427187	0.0281542	0.0142396		0.041	0.045	0.0458	0.0352	0.0258	0.0302	0.0274	0.0222		0.00301667	0.0119854	-0.00145208	0.00811667	0.00600208	0.0125187	0.000754167	-0.00796042		9.10028e-06	0.00014365	2.10855e-06	6.58803e-05	3.6025e-05	0.000156719	5.68767e-07	6.33682e-05
52	0.0426167	0.0546354	0.0461479	0.0421167	0.0321021	0.0424687	0.0269042	0.0167896		0.0409	0.0448	0.0458	0.0352	0.0257	0.03	0.0275	0.0221		0.00171667	0.00983542	0.000347917	0.00691667	0.00640208	0.0124688	-0.000595833	-0.00531042		2.94694e-06	9.67354e-05	1.21046e-07	4.78403e-05	4.09867e-05	0.00015547	3.55017e-07	2.82005e-05
52.2	0.0420167	0.0532354	0.0450979	0.0444167	0.0310021	0.0410187	0.0296042	0.0150396		0.0408	0.0446	0.0457	0.0351	0.0257	0.03	0.0275	0.022		0.00121667	0.00863542	-0.000602083	0.00931667	0.00530208	0.0110188	0.00210417	-0.00696042		1.48028e-06	7.45704e-05	3.62504e-07	8.68003e-05	2.81121e-05	0.000121413	4.42752e-06	4.84474e-05
52.4	0.0430167	0.0563354	0.0432479	0.0458667	0.0286521	0.0402187	0.0322042	0.0148396		0.0406	0.0444	0.0456	0.0352	0.0257	0.03	0.0275	0.022		0.00241667	0.0119354	-0.00235208	0.0106667	0.00295208	0.0102187	0.00470417	-0.00716042		5.84028e-06	0.000142454	5.5323e-06	0.000113778	8.7148e-06	0.000104423	2.21292e-05	5.12716e-05
52.6	0.0405667	0.0566354	0.0430479	0.0418167	0.0270521	0.0415188	0.0294042	0.0136396		0.0404	0.0441	0.0454	0.0351	0.0256	0.0301	0.0274	0.0222		0.000166667	0.0125354	-0.00235208	0.00671667	0.00145208	0.0114188	0.00200417	-0.00856042		2.77778e-08	0.000157137	5.5323e-06	4.51136e-05	2.10855e-06	0.000130388	4.01668e-06	7.32807e-05
52.8	0.0408667	0.0580354	0.0422979	0.0422667	0.0289521	0.0417187	0.0291542	0.0165896		0.0401	0.0438	0.0452	0.0351	0.0255	0.0301	0.0274	0.0225		0.000766667	0.0142354	-0.00290208	0.00716667	0.00345208	0.0116188	0.00175417	-0.00591042		5.87778e-07	0.000202647	8.42209e-06	5.13611e-05	1.19169e-05	0.000134995	3.0771e-06	3.4933e-05
53	0.0430167	0.0594354	0.0422979	0.0421667	0.0280521	0.0439687	0.0290542	0.0162896		0.0399	0.0436	0.045	0.0349	0.0255	0.0301	0.0274	0.0226		0.00311667	0.0158354	-0.00270208	0.00726667	0.00255208	0.0138687	0.00165417	-0.00631042		9.71361e-06	0.00025076	7.30125e-06	5.28044e-05	6.51313e-06	0.000192342	2.73627e-06	3.98214e-05
53.2	0.0423667	0.0609354	0.0435479	0.0433167	0.0294521	0.0429688	0.0298042	0.0161396		0.0397	0.0433	0.0448	0.0347	0.0255	0.0301	0.0273	0.0224		0.00266667	0.0176354	-0.00125208	0.00861667	0.00395208	0.0128688	0.00250417	-0.00626042		7.11111e-06	0.000311008	1.56771e-06	7.42469e-05	1.5619e-05	0.000165605	6.27085e-06	3.91928e-05
53.4	0.0418167	0.0566354	0.0437979	0.0410167	0.0294021	0.0433188	0.0306542	0.0148896		0.0395	0.0431	0.0445	0.0344	0.0254	0.03	0.0273	0.0219		0.00231667	0.0135354	-0.000702083	0.00661667	0.00400208	0.0133188	0.00335417	-0.00701042		5.36694e-06	0.000183208	4.92921e-07	4.37803e-05	1.60167e-05	0.000177389	1.12504e-05	4.91459e-05
53.6	0.0412667	0.0527354	0.0444479	0.0388167	0.0279521	0.0461188	0.0262042	0.0113396		0.0393	0.0428	0.0443	0.0343	0.0254	0.0299	0.0271	0.0214		0.00196667	0.00993542	0.000147917	0.00451667	0.00255208	0.0162188	-0.000895833	-0.0100604		3.86778e-06	9.87125e-05	2.18793e-08	2.04003e-05	6.51313e-06	0.000263048	8.02517e-07	0.000101212
53.8	0.0410667	0.0553354	0.0448479	0.0414167	0.0278021	0.0445688	0.0285542	0.0122896		0.0392	0.0427	0.0441	0.0341	0.0254	0.0298	0.0269	0.021		0.00186667	0.0126354	0.000747917	0.00731667	0.00240208	0.0147688	0.00165417	-0.00871042		3.48444e-06	0.000159654	5.59379e-07	5.35336e-05	5.77e-06	0.000218116	2.73627e-06	7.58714e-05
54	0.0412667	0.0542854	0.0441979	0.0451667	0.0277521	0.0415688	0.0270042	0.0118396		0.039	0.0426	0.0439	0.0339	0.0253	0.0297	0.0267	0.0209		0.00226667	0.0116854	0.000297917	0.0112667	0.00245208	0.0118688	0.000304167	-0.00906042		5.13778e-06	0.000136549	8.87543e-08	0.000126938	6.01271e-06	0.000140867	9.25174e-08	8.20912e-05
54.2	0.0429167	0.0545354	0.0423479	0.0443167	0.0285021	0.0422687	0.0253542	0.0121896		0.0389	0.0426	0.0438	0.0339	0.0251	0.0296	0.0265	0.021		0.00401667	0.0119354	-0.00145208	0.0104167	0.00340208	0.0126687	-0.00114583	-0.00881042		1.61336e-05	0.000142454	2.10855e-06	0.000108507	1.15742e-05	0.000160497	1.31293e-06	7.76234e-05
54.4	0.0388667	0.0544354	0.0405479	0.0442167	0.0276021	0.0430687	0.0257542	0.0168896		0.0389	0.0426	0.0437	0.0338	0.0249	0.0295	0.0263	0.0212		-3.33333e-05	0.0118354	-0.00315208	0.0104167	0.00270208	0.0135687	-0.000545833	-0.00431042		1.11111e-09	0.000140077	9.93563e-06	0.000108507	7.30125e-06	0.000184111	2.97934e-07	1.85797e-05
54.6	0.0417667	0.0492354	0.0413979	0.0418167	0.0286021	0.0447188	0.0287042	0.0152396		0.0388	0.0427	0.0437	0.0337	0.0246	0.0293	0.0261	0.0213		0.00296667	0.00653542	-0.00230208	0.00811667	0.00400208	0.0154188	0.00260417	-0.00606042		8.80111e-06	4.27117e-05	5.29959e-06	6.58803e-05	1.60167e-05	0.000237738	6.78168e-06	3.67287e-05
54.8	0.0409667	0.0496854	0.0432979	0.0372167	0.0288021	0.0426687	0.0272042	0.0174896		0.0388	0.0428	0.0437	0.0336	0.0244	0.0292	0.026	0.0213		0.00216667	0.00688542	-0.000402083	0.00361667	0.00440208	0.0134687	0.00120417	-0.00381042		4.69444e-06	4.7409e-05	1.61671e-07	1.30803e-05	1.93783e-05	0.000181407	1.45002e-06	1.45193e-05
55	0.0416167	0.0557854	0.0455479	0.0400667	0.0309021	0.0413188	0.0291542	0.0124896		0.0388	0.0427	0.0437	0.0336	0.0242	0.029	0.0259	0.0212		0.00281667	0.0130854	0.00184792	0.00646667	0.00670208	0.0123187	0.00325417	-0.00871042		7.93361e-06	0.000171228	3.4148e-06	4.18178e-05	4.49179e-05	0.000151752	1.05896e-05	7.58714e-05
55.2	0.0411167	0.0581354	0.0426479	0.0405167	0.0306521	0.0430188	0.0290042	0.0104396		0.0388	0.0427	0.0437	0.0336	0.0241	0.0289	0.0259	0.0209		0.00231667	0.0154354	-0.00105208	0.00691667	0.00655208	0.0141188	0.00310417	-0.0104604		5.36694e-06	0.000238252	1.10688e-06	4.78403e-05	4.29298e-05	0.000199339	9.63585e-06	0.00010942
55.4	0.0407167	0.0550354	0.0432479	0.0411667	0.0307021	0.0415688	0.0266042	0.0114396		0.0388	0.0427	0.0437	0.0336	0.024	0.0289	0.026	0.0206		0.00191667	0.0123354	-0.000452083	0.00756667	0.00670208	0.0126688	0.000604167	-0.00916042		3.67361e-06	0.000152163	2.04379e-07	5.72544e-05	4.49179e-05	0.000160497	3.65017e-07	8.39132e-05
55.6	0.0395667	0.0538354	0.0427479	0.0437667	0.0325021	0.0424687	0.0268542	0.0145896		0.0388	0.0427	0.0436	0.0336	0.024	0.0289	0.0262	0.0206		0.000766667	0.0111354	-0.000852083	0.0101667	0.00850208	0.0135688	0.000654167	-0.00601042		5.87778e-07	0.000123998	7.26046e-07	0.000103361	7.22854e-05	0.000184111	4.27934e-07	3.61251e-05
55.8	0.0387667	0.0544354	0.0420979	0.0443167	0.0317521	0.0483188	0.0261542	0.0122396		0.0388	0.0426	0.0436	0.0335	0.024	0.0289	0.0263	0.0208		-3.33333e-05	0.0118354	-0.00150208	0.0108167	0.00775208	0.0194188	-0.000145833	-0.00856042		1.11111e-09	0.000140077	2.25625e-06	0.000117	6.00948e-05	0.000377088	2.12674e-08	7.32807e-05
56	0.0397167	0.0535354	0.0391979	0.0425167	0.0297521	0.0442188	0.0272042	0.00968958		0.0387	0.0424	0.0436	0.0334	0.024	0.0289	0.0264	0.021		0.00101667	0.0111354	-0.00440208	0.00911667	0.00575208	0.0153188	0.000804167	-0.0113104		1.03361e-06	0.000123998	1.93783e-05	8.31136e-05	3.30865e-05	0.000234664	6.46684e-07	0.000127926
56.2	0.0407167	0.0506854	0.0406979	0.0421667	0.0281021	0.0435187	0.0273542	0.00968958		0.0385	0.0422	0.0435	0.0333	0.0241	0.0289	0.0264	0.0212		0.00221667	0.00848542	-0.00280208	0.00886667	0.00400208	0.0146187	0.000954167	-0.0115104		4.91361e-06	7.20023e-05	7.85167e-06	7.86178e-05	1.60167e-05	0.000213708	9.10434e-07	0.00013249
56.4	0.0395667	0.0550854	0.0424979	0.0396667	0.0270521	0.0430687	0.0291042	0.0103396		0.0384	0.0421	0.0434	0.0332	0.0242	0.0289	0.0263	0.0212		0.00116667	0.0129854	-0.000902083	0.00646667	0.00285208	0.0141687	0.00280417	-0.0108604		1.36111e-06	0.000168621	8.13754e-07	4.18178e-05	8.13438e-06	0.000200753	7.86335e-06	0.000117949
56.6	0.0401667	0.0557854	0.0447979	0.0393667	0.0238521	0.0409687	0.0238542	0.00943958		0.0383	0.042	0.0433	0.0331	0.0243	0.0288	0.0261	0.0211		0.00186667	0.0137854	0.00149792	0.00626667	-0.000447917	0.0121687	-0.00224583	-0.0116604		3.48444e-06	0.000190038	2.24375e-06	3.92711e-05	2.00629e-07	0.000148078	5.04377e-06	0.000135965
56.8	0.0386667	0.0522854	0.0452979	0.0419667	0.0245021	0.0405688	0.0257042	0.00958958		0.0382	0.0417	0.0431	0.033	0.0244	0.0288	0.0259	0.0208		0.000466667	0.0105854	0.00219792	0.00896667	0.000102083	0.0117688	-0.000195833	-0.0112104		2.17778e-07	0.000112051	4.83084e-06	8.04011e-05	1.0421e-08	0.000138503	3.83507e-08	0.000125673
57	0.0401667	0.0543854	0.0437479	0.0391167	0.0252521	0.0414187	0.0246542	0.00773958		0.038	0.0415	0.043	0.0329	0.0243	0.0287	0.0257	0.0204		0.00216667	0.0128854	0.000747917	0.00621667	0.000952083	0.0127187	-0.00104583	-0.0126604		4.69444e-06	0.000166034	5.59379e-07	3.86469e-05	9.06463e-07	0.000161767	1.09377e-06	0.000160286
57.2	0.0395667	0.0512854	0.0435979	0.0419667	0.0287021	0.0368187	0.0249542	0.00683958		0.0378	0.0413	0.0428	0.0328	0.0241	0.0287	0.0255	0.02		0.00176667	0.00998542	0.000797917	0.00916667	0.00460208	0.00811875	-0.000545833	-0.0131604		3.12111e-06	9.97085e-05	6.36671e-07	8.40278e-05	2.11792e-05	6.59141e-05	2.97934e-07	0.000173197
57.4	0.0402667	0.0519354	0.0421979	0.0412167	0.0277521	0.0406187	0.0260042	0.0133396		0.0377	0.0411	0.0427	0.0327	0.0239	0.0286	0.0253	0.0198		0.00256667	0.0108354	-0.000502083	0.00851667	0.00385208	0.0120187	0.000704167	-0.00646042		6.58778e-06	0.000117406	2.52088e-07	7.25336e-05	1.48385e-05	0.00014445	4.95851e-07	4.1737e-05
57.6	0.0407667	0.0526354	0.0418479	0.0399667	0.0297521	0.0389188	0.0260042	0.0152396		0.0376	0.0409	0.0425	0.0327	0.0237	0.0285	0.0252	0.0197		0.00316667	0.0117354	-0.000652083	0.00726667	0.00605208	0.0104188	0.000804167	-0.00446042		1.00278e-05	0.00013772	4.25213e-07	5.28044e-05	3.66277e-05	0.00010855	6.46684e-07	1.98953e-05
57.8	0.0408667	0.0554854	0.0412479	0.0395167	0.0284521	0.0421687	0.0276542	0.0137396		0.0374	0.0407	0.0423	0.0326	0.0235	0.0284	0.0251	0.0198		0.00346667	0.0147854	-0.00105208	0.00691667	0.00495208	0.0137687	0.00255417	-0.00606042		1.20178e-05	0.000218609	1.10688e-06	4.78403e-05	2.45231e-05	0.000189578	6.52377e-06	3.67287e-05
58	0.0399667	0.0536354	0.0427479	0.0409167	0.0279021	0.0432688	0.0284042	0.0102396		0.0373	0.0406	0.0422	0.0325	0.0234	0.0282	0.0251	0.0199		0.00266667	0.0130354	0.000547917	0.00841667	0.00450208	0.0150688	0.00330417	-0.00966042		7.11111e-06	0.000169922	3.00213e-07	7.08403e-05	2.02688e-05	0.000227067	1.09175e-05	9.33237e-05
58.2	0.0395167	0.0546854	0.0445979	0.0419667	0.0289021	0.0435687	0.0288542	0.00773958		0.0371	0.0405	0.042	0.0323	0.0233	0.028	0.025	0.02		0.00241667	0.0141854	0.00259792	0.00966667	0.00560208	0.0155687	0.00385417	-0.0122604		5.84028e-06	0.000201226	6.74917e-06	9.34444e-05	3.13833e-05	0.000242386	1.48546e-05	0.000150318
58.4	0.0368167	0.0527354	0.0456979	0.0409167	0.0312521	0.0426687	0.0259042	0.00368958		0.037	0.0403	0.0419	0.0322	0.0232	0.0278	0.025	0.02		-0.000183333	0.0124354	0.00379792	0.00871667	0.00805208	0.0148688	0.000904167	-0.0163104		3.36111e-08	0.00015464	1.44242e-05	7.59803e-05	6.4836e-05	0.00022108	8.17517e-07	0.00026603
58.6	0.0380167	0.0485854	0.0421479	0.0415667	0.0301021	0.0416688	0.0282542	0.00368958		0.0369	0.0403	0.0418	0.0321	0.0231	0.0277	0.025	0.0199		0.00111667	0.00828542	0.000347917	0.00946667	0.00700208	0.0139688	0.00325417	-0.0162104		1.24694e-06	6.86481e-05	1.21046e-07	8.96178e-05	4.90292e-05	0.000195126	1.05896e-05	0.000262778
58.8	0.0403667	0.0506854	0.0412479	0.0429667	0.0299021	0.0397187	0.0243542	0.0100896		0.0368	0.0402	0.0418	0.032	0.023	0.0276	0.025	0.0198		0.00356667	0.0104854	-0.000552083	0.0109667	0.00690208	0.0121187	-0.000645833	-0.00971042		1.27211e-05	0.000109944	3.04796e-07	0.000120268	4.76388e-05	0.000146864	4.17101e-07	9.42922e-05
59	0.0390167	0.0485854	0.0400479	0.0412667	0.0264521	0.0409687	0.0237542	0.0127896		0.0367	0.0401	0.0417	0.0319	0.0229	0.0276	0.025	0.0198		0.00231667	0.00848542	-0.00165208	0.00936667	0.00355208	0.0133687	-0.00124583	-0.00701042		5.36694e-06	7.20023e-05	2.72938e-06	8.77344e-05	1.26173e-05	0.000178723	1.5521e-06	4.91459e-05
59.2	0.0354667	0.0496354	0.0402979	0.0382167	0.0267521	0.0361187	0.0269542	0.0165396		0.0366	0.04	0.0416	0.0318	0.0228	0.0276	0.0249	0.0197		-0.00113333	0.00963542	-0.00130208	0.00641667	0.00395208	0.00851875	0.00205417	-0.00316042		1.28444e-06	9.28413e-05	1.69542e-06	4.11736e-05	1.5619e-05	7.25691e-05	4.2196e-06	9.98823e-06
59.4	0.0371167	0.0516354	0.0388979	0.0395667	0.0270521	0.0343688	0.0266042	0.0183396		0.0365	0.04	0.0415	0.0318	0.0227	0.0277	0.0249	0.0198		0.000616667	0.0116354	-0.00260208	0.00776667	0.00435208	0.00666875	0.00170417	-0.00146042		3.80278e-07	0.000135383	6.77084e-06	6.03211e-05	1.89406e-05	4.44722e-05	2.90418e-06	2.13282e-06
59.6	0.0373667	0.0495854	0.0407979	0.0404667	0.0251521	0.0365188	0.0259542	0.0155896		0.0364	0.04	0.0414	0.0317	0.0227	0.0278	0.0249	0.0199		0.000966667	0.00958542	-0.000602083	0.00876667	0.00245208	0.00871875	0.00105417	-0.00431042		9.34444e-07	9.18802e-05	3.62504e-07	7.68544e-05	6.01271e-06	7.60166e-05	1.11127e-06	1.85797e-05
59.8	0.0385667	0.0506354	0.0422979	0.0356667	0.0250021	0.0384188	0.0274542	0.0118396		0.0364	0.04	0.0413	0.0316	0.0227	0.0278	0.0249	0.0199		0.00216667	0.0106354	0.000997917	0.00406667	0.00230208	0.0106188	0.00255417	-0.00806042		4.69444e-06	0.000113112	9.95838e-07	1.65378e-05	5.29959e-06	0.000112758	6.52377e-06	6.49703e-05
60	0.0361667	0.0491854	0.0415479	0.0376667	0.0264521	0.0390687	0.0280542	0.0124396		0.0363	0.0399	0.0413	0.0315	0.0228	0.0278	0.0248	0.0198		-0.000133333	0.00928542	0.000247917	0.00616667	0.00365208	0.0112688	0.00325417	-0.00736042		1.77778e-08	8.6219e-05	6.14627e-08	3.80278e-05	1.33377e-05	0.000126985	1.05896e-05	5.41757e-05
